# Supplementary material for: Temporal proteomic analysis of HIV infection reveals remodelling of the host phosphoproteome by lentiviral Vif variants
Source: eLife. 2016 Sep 30;5:e18296. doi: 10.7554/eLife.18296 (PMC5085607; doi:10.7554/eLife.18296)
Supplement: Figure 1—source data 1. — Interactive spreadsheet enabling generation of temporal profiles of protein abundance for any quantitated genes of interest ('Gene search and plots' worksheet). Detailed instructions are incorporated into the spreadsheet. The complete (unfiltered) TMT-based proteomic time course dataset ('Complete TMT time course data' worksheet) and a database of gene name aliases ('Gene name aliases' worksheet) are also included. Protein abundance is depicted on a colour scale (red = downregulated; green = upregulated). The number of unique peptides, peptides and peptide spectral matches are specified for each protein, along with ratio counts and variability for each TMT condition. DOI: http://dx.doi.org/10.7554/eLife.18296.004 [file elife-18296-fig1-data1.xlsx]

## Sheet: Complete TMT time course data
Accession	Gene name	Protein name	Description	# AAs	MW [kDa]	6 h	24 h	48 h	72 h	RTi	UniPeps	Peps	PSMs	6 h Count	6 h Var%	24 h Count	24 h Var%	48 h Count	48 h Var%	72 h Count	72 h Var%	RTi Count	RTi Var%
H3BU82	AAAS		Aladin (Fragment) OS=Homo sapiens GN=AAAS PE=2 SV=1 - [H3BU82_HUMAN]	358	38.5	1.012	0.962	0.799	0.734	0.894	8	8	12	12	6.1	11	5.1	12	6.8	11	10.3	12	7
Q86V21	AACS	Acetoacetyl-CoA synthetase	Acetoacetyl-CoA synthetase OS=Homo sapiens GN=AACS PE=1 SV=1 - [AACS_HUMAN]	672	75.1	0.988	0.998	1.14	1.435	1.406	6	7	8	7	14.9	7	3.8	7	10.7	7	18.2	7	5
Q6PD74	AAGAB	Alpha- and gamma-adaptin-binding protein p34	Alpha- and gamma-adaptin-binding protein p34 OS=Homo sapiens GN=AAGAB PE=1 SV=1 - [AAGAB_HUMAN]	315	34.6	0.954	0.87	0.475	0.379	0.982	2	2	4	4	2	4	3.2	4	16.4	4	26.7	4	5
Q2M2I8	AAK1	AP2-associated protein kinase 1	AP2-associated protein kinase 1 OS=Homo sapiens GN=AAK1 PE=1 SV=3 - [AAK1_HUMAN]	961	103.8	1.007	1.317	1.532	1.784	1.529	14	14	19	19	6	19	10.2	19	11.6	19	16.8	19	11.4
Q9H7C9	AAMDC	Mth938 domain-containing protein	Mth938 domain-containing protein OS=Homo sapiens GN=AAMDC PE=1 SV=1 - [AAMDC_HUMAN]	122	13.3	1.039	0.855	1.167	1.32	1.145	6	6	6	6	3.3	6	5.3	6	13.2	6	13.8	6	9.1
C9JG97	AAMP		Angio-associated migratory cell protein OS=Homo sapiens GN=AAMP PE=2 SV=1 - [C9JG97_HUMAN]	415	44.7	0.876	0.799	0.601	0.607	0.729	11	11	16	16	9.8	16	4.9	16	11.4	16	15.7	16	7.7
Q9Y312	AAR2	Protein AAR2 homolog	Protein AAR2 homolog OS=Homo sapiens GN=AAR2 PE=1 SV=2 - [AAR2_HUMAN]	384	43.4	0.996	1.054	1.085	1.065	0.991	8	8	16	16	10.9	16	13.7	16	9.5	16	8.8	16	10.4
P49588	AARS	Alanine--tRNA ligase, cytoplasmic	Alanine--tRNA ligase, cytoplasmic OS=Homo sapiens GN=AARS PE=1 SV=2 - [SYAC_HUMAN]	968	106.7	1.021	0.852	0.872	0.865	0.777	36	36	74	73	6.1	73	9.7	73	9.2	73	7.4	73	9.8
Q5JTZ9	AARS2	Alanine--tRNA ligase, mitochondrial	Alanine--tRNA ligase, mitochondrial OS=Homo sapiens GN=AARS2 PE=1 SV=1 - [SYAM_HUMAN]	985	107.3	0.991	0.961	1.036	1.075	0.982	16	16	21	21	11.7	21	9.6	21	12.9	21	7.6	21	8.4
Q9BTE6	AARSD1	Alanyl-tRNA editing protein Aarsd1	Alanyl-tRNA editing protein Aarsd1 OS=Homo sapiens GN=AARSD1 PE=1 SV=2 - [AASD1_HUMAN]	412	45.5	1.031	1.113	1.129	1.099	1.229	10	10	17	16	12.3	16	18.8	16	11.4	16	14.6	16	13.8
Q9NRN7	AASDHPPT	L-aminoadipate-semialdehyde dehydrogenase-phosphopantetheinyl transferase	L-aminoadipate-semialdehyde dehydrogenase-phosphopantetheinyl transferase OS=Homo sapiens GN=AASDHPPT PE=1 SV=2 - [ADPPT_HUMAN]	309	35.8	0.99	0.925	0.848	0.82	0.9	5	5	10	10	4.2	10	2.7	10	5.6	10	4.5	10	7.7
Q9UDR5	AASS	Alpha-aminoadipic semialdehyde synthase, mitochondrial;Lysine ketoglutarate reductase;Saccharopine dehydrogenase	Alpha-aminoadipic semialdehyde synthase, mitochondrial OS=Homo sapiens GN=AASS PE=1 SV=1 - [AASS_HUMAN]	926	102.1	1.051	1.067	1.321	1.472	1.156	9	9	11	11	11.1	11	9	11	12.9	11	12.5	11	10.6
Q9NY61	AATF	Protein AATF	Protein AATF OS=Homo sapiens GN=AATF PE=1 SV=1 - [AATF_HUMAN]	560	63.1	0.955	0.917	0.797	0.699	0.772	13	13	18	18	9.2	18	6.5	18	16.9	18	18.1	18	10.4
P80404	ABAT	4-aminobutyrate aminotransferase, mitochondrial	4-aminobutyrate aminotransferase, mitochondrial OS=Homo sapiens GN=ABAT PE=1 SV=3 - [GABT_HUMAN]	500	56.4	0.989	1.051	1.437	1.601	1.249	5	5	6	6	8.3	6	14.2	6	36.6	6	50.6	6	23.2
O95477	ABCA1	ATP-binding cassette sub-family A member 1	ATP-binding cassette sub-family A member 1 OS=Homo sapiens GN=ABCA1 PE=1 SV=3 - [ABCA1_HUMAN]	2261	254.1	1.067	0.905	0.789	0.776	0.762	1	1	1	1	NaN	1	NaN	1	NaN	1	NaN	1	NaN
Q9NRK6	ABCB10	ATP-binding cassette sub-family B member 10, mitochondrial	ATP-binding cassette sub-family B member 10, mitochondrial OS=Homo sapiens GN=ABCB10 PE=1 SV=2 - [ABCBA_HUMAN]	738	79.1	1.007	0.957	0.886	0.849	0.777	16	16	28	27	7.7	27	10.2	27	9.2	27	8.9	27	7.6
G3XAC4	ABCB7		ATP-binding cassette sub-family B member 7, mitochondrial OS=Homo sapiens GN=ABCB7 PE=2 SV=1 - [G3XAC4_HUMAN]	712	78.1	1.032	0.975	1.009	1.004	0.875	12	12	17	17	3.9	17	4.6	17	5.7	17	9.4	17	4.8
G3XAP3	ABCB8		ATP-binding cassette sub-family B member 8, mitochondrial OS=Homo sapiens GN=ABCB8 PE=2 SV=1 - [G3XAP3_HUMAN]	630	68	0.95	1.028	0.993	0.846	0.836	3	4	4	3	11.1	3	7	3	8	3	8.6	3	15.1
I3L4X2	ABCC1		Multidrug resistance-associated protein 1 (Fragment) OS=Homo sapiens GN=ABCC1 PE=3 SV=1 - [I3L4X2_HUMAN]	1440	160.4	0.998	0.894	0.957	1.136	1.02	11	11	12	12	12.5	12	10.3	12	22.9	12	18.8	12	21
O15439	ABCC4	Multidrug resistance-associated protein 4	Multidrug resistance-associated protein 4 OS=Homo sapiens GN=ABCC4 PE=1 SV=3 - [MRP4_HUMAN]	1325	149.4	1.093	1.102	0.974	1.083	1.001	2	3	3	2	17.7	2	12	2	7.3	2	11.3	2	3.6
P28288	ABCD3	ATP-binding cassette sub-family D member 3	ATP-binding cassette sub-family D member 3 OS=Homo sapiens GN=ABCD3 PE=1 SV=1 - [ABCD3_HUMAN]	659	75.4	1.039	1.023	1.111	1.251	1.085	18	19	27	26	5.8	26	6.7	26	5.1	26	7.5	26	9
P61221	ABCE1	ATP-binding cassette sub-family E member 1	ATP-binding cassette sub-family E member 1 OS=Homo sapiens GN=ABCE1 PE=1 SV=1 - [ABCE1_HUMAN]	599	67.3	1.012	1.015	0.914	0.811	0.892	13	17	42	37	6.9	37	9.7	37	10.7	37	8.5	37	11.5
H0Y990	ABCE1		ATP-binding cassette sub-family E member 1 (Fragment) OS=Homo sapiens GN=ABCE1 PE=2 SV=1 - [H0Y990_HUMAN]	147	16.2	0.938	1.048	1.073	0.834	0.767	1	5	6	1	NaN	1	NaN	1	NaN	1	NaN	1	NaN
Q8NE71	ABCF1	ATP-binding cassette sub-family F member 1	ATP-binding cassette sub-family F member 1 OS=Homo sapiens GN=ABCF1 PE=1 SV=2 - [ABCF1_HUMAN]	845	95.9	0.991	0.924	0.892	0.898	0.886	13	23	34	19	7.2	19	4.6	19	16	19	10.1	19	7.4
Q5STZ8	ABCF1		ATP-binding cassette sub-family F member 1 (Fragment) OS=Homo sapiens GN=ABCF1 PE=2 SV=2 - [Q5STZ8_HUMAN]	340	38.4	1.022	0.848	0.821	0.884	0.614	1	11	17	4	16.5	4	7.9	4	10.4	4	12.4	4	41.5
Q9UG63	ABCF2	ATP-binding cassette sub-family F member 2	ATP-binding cassette sub-family F member 2 OS=Homo sapiens GN=ABCF2 PE=1 SV=2 - [ABCF2_HUMAN]	623	71.2	0.91	0.987	0.804	0.763	0.898	21	21	34	34	6.7	34	6.4	34	11	33	8.6	34	10.5
Q9NUQ8	ABCF3	ATP-binding cassette sub-family F member 3	ATP-binding cassette sub-family F member 3 OS=Homo sapiens GN=ABCF3 PE=1 SV=2 - [ABCF3_HUMAN]	709	79.7	0.96	1.103	1.161	1.206	1.084	11	11	15	15	9.2	15	12.7	15	8.1	15	11.5	15	13.3
Q9NUJ1	ABHD10	Mycophenolic acid acyl-glucuronide esterase, mitochondrial	Mycophenolic acid acyl-glucuronide esterase, mitochondrial OS=Homo sapiens GN=ABHD10 PE=1 SV=1 - [ABHDA_HUMAN]	306	33.9	0.973	0.989	1.166	1.234	1	9	9	20	20	6.4	20	6.7	20	8.8	20	10.6	20	6.2
Q8NFV4	ABHD11	Alpha/beta hydrolase domain-containing protein 11	Alpha/beta hydrolase domain-containing protein 11 OS=Homo sapiens GN=ABHD11 PE=2 SV=1 - [ABHDB_HUMAN]	315	34.7	1.042	0.927	0.943	0.998	0.784	3	3	3	3	2.6	3	2.2	3	6.7	3	4.8	3	1.3
Q8N2K0	ABHD12	Monoacylglycerol lipase ABHD12	Monoacylglycerol lipase ABHD12 OS=Homo sapiens GN=ABHD12 PE=1 SV=2 - [ABD12_HUMAN]	398	45.1	1.026	1.052	1.249	1.431	1.121	5	5	6	6	13.2	6	10	6	6.6	6	8.7	6	9.8
Q96IU4	ABHD14B	Alpha/beta hydrolase domain-containing protein 14B	Alpha/beta hydrolase domain-containing protein 14B OS=Homo sapiens GN=ABHD14B PE=1 SV=1 - [ABHEB_HUMAN]	210	22.3	1.088	1.038	1.191	1.174	1.011	6	6	10	10	7.4	10	5	10	8.6	10	5.2	10	2.6
Q6UXT9	ABHD15	Abhydrolase domain-containing protein 15	Abhydrolase domain-containing protein 15 OS=Homo sapiens GN=ABHD15 PE=2 SV=2 - [ABH15_HUMAN]	468	51.7	1.026	1.289	1.46	1.625	1.606	1	1	1	1	NaN	1	NaN	1	NaN	1	NaN	1	NaN
O95870	ABHD16A	Abhydrolase domain-containing protein 16A	Abhydrolase domain-containing protein 16A OS=Homo sapiens GN=ABHD16A PE=1 SV=3 - [ABHGA_HUMAN]	558	63.2	1.012	1.117	1.252	1.518	1.218	4	4	4	4	14.9	4	16.6	4	5.1	4	12.9	4	18.8
Q5VST6	ABHD17B	Alpha/beta hydrolase domain-containing protein 17B	Alpha/beta hydrolase domain-containing protein 17B OS=Homo sapiens GN=ABHD17B PE=2 SV=1 - [AB17B_HUMAN]	288	32.2	0.936	1.173	0.876	0.819	1.258	3	3	4	4	7	4	10.1	4	11.5	4	22.7	4	18.1
J3KSP1	ABHD3		Abhydrolase domain-containing protein 3 OS=Homo sapiens GN=ABHD3 PE=4 SV=1 - [J3KSP1_HUMAN]	214	24.4	0.924	2.06	2.463	2.034	1.02	1	1	1	1	NaN	1	NaN	1	NaN	1	NaN	1	NaN
F5H1G9	ABI1		Abl interactor 1 OS=Homo sapiens GN=ABI1 PE=2 SV=1 - [F5H1G9_HUMAN]	394	43.4	1.044	0.935	1.025	1.058	1.059	7	7	13	13	10.1	13	12.1	13	10.5	13	13.2	13	11.7
Q9P2A4	ABI3	ABI gene family member 3	ABI gene family member 3 OS=Homo sapiens GN=ABI3 PE=1 SV=2 - [ABI3_HUMAN]	366	39	1.024	0.915	1.271	1.109	0.977	2	2	2	2	7	2	4.8	2	17.4	2	36.2	2	37.6
P00519	ABL1	Tyrosine-protein kinase ABL1	Tyrosine-protein kinase ABL1 OS=Homo sapiens GN=ABL1 PE=1 SV=4 - [ABL1_HUMAN]	1130	122.8	0.943	0.863	0.965	1.063	1.156	1	3	3	1	NaN	1	NaN	1	NaN	1	NaN	1	NaN
P42684	ABL2	Abelson tyrosine-protein kinase 2	Abelson tyrosine-protein kinase 2 OS=Homo sapiens GN=ABL2 PE=1 SV=1 - [ABL2_HUMAN]	1182	128.3	0.941	0.831	0.728	0.716	0.942	1	3	3	1	NaN	1	NaN	1	NaN	1	NaN	1	NaN
J3QSX6	ABLIM1		Actin-binding LIM protein 1 OS=Homo sapiens GN=ABLIM1 PE=4 SV=1 - [J3QSX6_HUMAN]	455	52	0.973	0.963	1.009	1.067	1.125	7	7	7	7	6	7	9.1	7	15.2	7	1.9	7	8.6
Q12979	ABR	Active breakpoint cluster region-related protein	Active breakpoint cluster region-related protein OS=Homo sapiens GN=ABR PE=2 SV=2 - [ABR_HUMAN]	859	97.5	0.982	1.071	1.116	1.158	1.307	5	6	6	5	5.1	5	15.2	5	7.7	5	14.7	5	5.5
Q9P1F3	ABRACL	Costars family protein ABRACL	Costars family protein ABRACL OS=Homo sapiens GN=ABRACL PE=1 SV=1 - [ABRAL_HUMAN]	81	9.1	0.991	0.934	0.637	0.93	1.333	1	1	1	1	NaN	1	NaN	1	NaN	1	NaN	1	NaN
Q9ULW3	ABT1	Activator of basal transcription 1	Activator of basal transcription 1 OS=Homo sapiens GN=ABT1 PE=1 SV=1 - [ABT1_HUMAN]	272	31.1	1.012	0.985	0.794	0.714	0.867	6	6	6	6	5.2	6	7.1	6	10.5	6	34.8	6	17.7
P09110	ACAA1	3-ketoacyl-CoA thiolase, peroxisomal	3-ketoacyl-CoA thiolase, peroxisomal OS=Homo sapiens GN=ACAA1 PE=1 SV=2 - [THIK_HUMAN]	424	44.3	0.992	1.083	1.2	1.293	1.177	12	12	28	28	10.9	28	13	28	12	28	10.8	28	5.9
P42765	ACAA2	3-ketoacyl-CoA thiolase, mitochondrial	3-ketoacyl-CoA thiolase, mitochondrial OS=Homo sapiens GN=ACAA2 PE=1 SV=2 - [THIM_HUMAN]	397	41.9	1.061	1.175	1.418	1.556	1.284	14	15	29	27	9.1	27	13.6	27	9.8	27	13.4	27	9.3
Q13085	ACACA	Acetyl-CoA carboxylase 1;Biotin carboxylase	Acetyl-CoA carboxylase 1 OS=Homo sapiens GN=ACACA PE=1 SV=2 - [ACACA_HUMAN]	2346	265.4	0.956	0.871	0.871	0.934	0.782	45	45	58	58	11.3	58	11	58	10	58	10.5	58	10.1
D6RFF6	ACAD10		Acyl-CoA dehydrogenase family member 10 (Fragment) OS=Homo sapiens GN=ACAD10 PE=2 SV=1 - [D6RFF6_HUMAN]	96	11.1	0.842	1.052	1.107	0.854	0.813	1	1	1	1	NaN	1	NaN	1	NaN	1	NaN	1	NaN
Q9UKU7	ACAD8	Isobutyryl-CoA dehydrogenase, mitochondrial	Isobutyryl-CoA dehydrogenase, mitochondrial OS=Homo sapiens GN=ACAD8 PE=1 SV=1 - [ACAD8_HUMAN]	415	45	1.032	1.064	1.222	1.421	1.101	10	10	16	16	6.4	16	14.3	16	9.2	16	18.1	16	8.5
Q9H845	ACAD9	Acyl-CoA dehydrogenase family member 9, mitochondrial	Acyl-CoA dehydrogenase family member 9, mitochondrial OS=Homo sapiens GN=ACAD9 PE=1 SV=1 - [ACAD9_HUMAN]	621	68.7	0.98	1.06	1.038	1.044	0.945	6	6	9	9	8.1	9	7.7	9	3	9	14.2	9	9.7
P11310	ACADM	Medium-chain specific acyl-CoA dehydrogenase, mitochondrial	Medium-chain specific acyl-CoA dehydrogenase, mitochondrial OS=Homo sapiens GN=ACADM PE=1 SV=1 - [ACADM_HUMAN]	421	46.6	1.043	0.915	1.05	1.191	0.958	15	16	36	35	7.4	35	8.9	35	7.7	35	8	35	9.9
E9PE82	ACADS		Short-chain-specific acyl-CoA dehydrogenase, mitochondrial OS=Homo sapiens GN=ACADS PE=2 SV=1 - [E9PE82_HUMAN]	408	44	0.967	0.943	1.212	1.422	0.955	2	2	2	2	10.5	2	16.6	2	13.4	2	7.9	2	18.1
P45954	ACADSB	Short/branched chain specific acyl-CoA dehydrogenase, mitochondrial	Short/branched chain specific acyl-CoA dehydrogenase, mitochondrial OS=Homo sapiens GN=ACADSB PE=1 SV=1 - [ACDSB_HUMAN]	432	47.5	1.031	1.019	1.242	1.344	1.141	11	11	14	14	6.8	14	6.6	14	8.4	14	7.3	14	6.2
P49748	ACADVL	Very long-chain specific acyl-CoA dehydrogenase, mitochondrial	Very long-chain specific acyl-CoA dehydrogenase, mitochondrial OS=Homo sapiens GN=ACADVL PE=1 SV=1 - [ACADV_HUMAN]	655	70.3	1.053	0.894	0.904	0.841	0.818	26	26	52	52	5.8	52	10	52	10.4	52	11.9	52	11
Q15027	ACAP1	Arf-GAP with coiled-coil, ANK repeat and PH domain-containing protein 1	Arf-GAP with coiled-coil, ANK repeat and PH domain-containing protein 1 OS=Homo sapiens GN=ACAP1 PE=1 SV=1 - [ACAP1_HUMAN]	740	81.5	0.955	0.924	0.983	1.025	1.077	15	16	21	20	12.6	20	10.1	20	12.1	20	5.9	20	8.9
Q15057	ACAP2	Arf-GAP with coiled-coil, ANK repeat and PH domain-containing protein 2	Arf-GAP with coiled-coil, ANK repeat and PH domain-containing protein 2 OS=Homo sapiens GN=ACAP2 PE=1 SV=3 - [ACAP2_HUMAN]	778	88	1.007	1.001	1.065	1.169	1.009	16	16	25	24	6.7	24	10.2	24	13.7	24	6.2	24	14.8
P24752	ACAT1	Acetyl-CoA acetyltransferase, mitochondrial	Acetyl-CoA acetyltransferase, mitochondrial OS=Homo sapiens GN=ACAT1 PE=1 SV=1 - [THIL_HUMAN]	427	45.2	1.024	0.946	0.983	0.959	0.808	19	19	60	56	6.8	56	10.1	56	8.8	56	9.7	56	14.7
Q9BWD1	ACAT2	Acetyl-CoA acetyltransferase, cytosolic	Acetyl-CoA acetyltransferase, cytosolic OS=Homo sapiens GN=ACAT2 PE=1 SV=2 - [THIC_HUMAN]	397	41.3	1.004	1.102	1.38	1.423	1.1	8	8	29	27	10.3	27	18.7	27	21.2	27	10.9	27	14.3
Q9H3P7	ACBD3	Golgi resident protein GCP60	Golgi resident protein GCP60 OS=Homo sapiens GN=ACBD3 PE=1 SV=4 - [GCP60_HUMAN]	528	60.6	1.045	1.036	1.073	1.066	0.981	11	11	23	21	10.8	21	15.2	21	16.5	21	18.4	21	14.4
Q5T8D3	ACBD5	Acyl-CoA-binding domain-containing protein 5	Acyl-CoA-binding domain-containing protein 5 OS=Homo sapiens GN=ACBD5 PE=1 SV=1 - [ACBD5_HUMAN]	534	60.1	0.87	1.149	1.037	1.022	1.067	2	5	5	2	1.7	2	5.4	2	4.7	2	0.5	2	16.2
B7Z2A7	ACBD5		Acyl-CoA-binding domain-containing protein 5 OS=Homo sapiens GN=ACBD5 PE=2 SV=1 - [B7Z2A7_HUMAN]	348	38.7	0.903	1.055	0.969	0.856	0.92	1	4	4	1	NaN	1	NaN	1	NaN	1	NaN	1	NaN
Q9BR61	ACBD6	Acyl-CoA-binding domain-containing protein 6	Acyl-CoA-binding domain-containing protein 6 OS=Homo sapiens GN=ACBD6 PE=1 SV=1 - [ACBD6_HUMAN]	282	31.1	0.869	0.8	0.643	0.602	0.794	3	3	3	3	2.3	3	2.4	3	6.1	3	3.2	3	3.7
Q8N6N7	ACBD7	Acyl-CoA-binding domain-containing protein 7	Acyl-CoA-binding domain-containing protein 7 OS=Homo sapiens GN=ACBD7 PE=1 SV=1 - [ACBD7_HUMAN]	88	9.8	1.038	0.868	0.666	0.824	1.133	5	5	7	7	1.5	7	7.8	7	7.8	7	11.7	7	9.7
S4R3H4	ACIN1		Apoptotic chromatin condensation inducer in the nucleus OS=Homo sapiens GN=ACIN1 PE=4 SV=1 - [S4R3H4_HUMAN]	1283	145.4	1.009	0.984	0.877	0.828	0.926	29	29	59	58	6.4	59	13.3	59	10.4	59	17.6	59	16.3
P53396	ACLY	ATP-citrate synthase	ATP-citrate synthase OS=Homo sapiens GN=ACLY PE=1 SV=3 - [ACLY_HUMAN]	1101	120.8	1.018	0.96	1.05	1.107	0.863	31	31	89	87	5.5	87	8.5	87	9.3	85	8.5	87	12.1
Q9NRP4	ACN9	Protein ACN9 homolog, mitochondrial	Protein ACN9 homolog, mitochondrial OS=Homo sapiens GN=ACN9 PE=2 SV=1 - [ACN9_HUMAN]	125	14.6	0.94	1.39	1.511	1.381	1.177	2	2	2	2	15.8	2	2.6	2	7.7	2	3.3	2	14.9
P21399	ACO1	Cytoplasmic aconitate hydratase	Cytoplasmic aconitate hydratase OS=Homo sapiens GN=ACO1 PE=1 SV=3 - [ACOC_HUMAN]	889	98.3	1.011	0.925	1.087	1.132	1.095	22	22	51	50	10.5	50	12.2	50	11.4	50	12.9	50	8.9
Q99798	ACO2	Aconitate hydratase, mitochondrial	Aconitate hydratase, mitochondrial OS=Homo sapiens GN=ACO2 PE=1 SV=2 - [ACON_HUMAN]	780	85.4	1.015	0.984	1.176	1.193	0.982	35	35	87	81	7.5	81	8.9	81	10.8	81	9.5	81	10.5
Q86TX2	ACOT1	Acyl-coenzyme A thioesterase 1	Acyl-coenzyme A thioesterase 1 OS=Homo sapiens GN=ACOT1 PE=1 SV=1 - [ACOT1_HUMAN]	421	46.2	1.007	1.075	1.163	1.277	1.016	15	15	33	33	5.6	33	6.8	33	9	33	7.9	33	6.8
Q9NPJ3	ACOT13	Acyl-coenzyme A thioesterase 13	Acyl-coenzyme A thioesterase 13 OS=Homo sapiens GN=ACOT13 PE=1 SV=1 - [ACO13_HUMAN]	140	15	1.02	1.056	1.279	1.475	1.187	4	4	12	12	5.5	12	4.4	12	5.5	12	7.1	12	7.1
O00154	ACOT7	Cytosolic acyl coenzyme A thioester hydrolase	Cytosolic acyl coenzyme A thioester hydrolase OS=Homo sapiens GN=ACOT7 PE=1 SV=3 - [BACH_HUMAN]	380	41.8	1.023	1.01	1.024	1.03	1.004	10	10	26	26	8.1	26	10.2	26	14.3	26	6.7	26	7.2
O14734	ACOT8	Acyl-coenzyme A thioesterase 8	Acyl-coenzyme A thioesterase 8 OS=Homo sapiens GN=ACOT8 PE=1 SV=1 - [ACOT8_HUMAN]	319	35.9	0.999	0.912	1.083	1.202	0.881	5	5	6	6	5.2	6	9	6	2.3	6	10.1	6	10.9
Q15067	ACOX1	Peroxisomal acyl-coenzyme A oxidase 1	Peroxisomal acyl-coenzyme A oxidase 1 OS=Homo sapiens GN=ACOX1 PE=1 SV=3 - [ACOX1_HUMAN]	660	74.4	0.983	1.133	1.401	1.251	1.164	18	18	33	33	6	33	7.8	33	10.7	33	12.7	33	13.6
O15254	ACOX3	Peroxisomal acyl-coenzyme A oxidase 3	Peroxisomal acyl-coenzyme A oxidase 3 OS=Homo sapiens GN=ACOX3 PE=1 SV=2 - [ACOX3_HUMAN]	700	77.6	1.089	0.976	1.131	1.317	1.022	5	5	6	6	12.7	6	9.4	6	10.8	6	11	6	3.1
P24666	ACP1	Low molecular weight phosphotyrosine protein phosphatase	Low molecular weight phosphotyrosine protein phosphatase OS=Homo sapiens GN=ACP1 PE=1 SV=3 - [PPAC_HUMAN]	158	18	1.041	0.972	1.112	1.156	0.999	7	7	27	27	7.3	27	12.7	27	16.9	27	14.7	27	9.8
D3YTI2	ACP1		Low molecular weight phosphotyrosine protein phosphatase OS=Homo sapiens GN=ACP1 PE=2 SV=1 - [D3YTI2_HUMAN]	85	9.4	1.299	0.869	1.349	1.192	0.904	2	2	2	2	46.3	2	7.9	2	11	2	12.5	2	20.1
G5EA28	ACP2		Acid phosphatase 2, lysosomal, isoform CRA_a OS=Homo sapiens GN=ACP2 PE=2 SV=1 - [G5EA28_HUMAN]	122	14	1.072	0.963	1.238	1.351	1.001	1	1	1	1	NaN	1	NaN	1	NaN	1	NaN	1	NaN
B7Z4T2	ACPL2		Acid phosphatase-like protein 2 OS=Homo sapiens GN=ACPL2 PE=2 SV=1 - [B7Z4T2_HUMAN]	442	51	0.998	0.971	0.813	0.668	0.722	1	1	2	2	20	2	23.4	2	1.6	2	25.1	2	5.9
E9PF16	ACSF2		Acyl-CoA synthetase family member 2, mitochondrial OS=Homo sapiens GN=ACSF2 PE=2 SV=1 - [E9PF16_HUMAN]	572	63.6	1.008	0.941	1.333	1.67	1.082	15	15	19	19	7.8	19	11.6	19	20.5	19	12.4	19	11.4
Q4G176	ACSF3	Acyl-CoA synthetase family member 3, mitochondrial	Acyl-CoA synthetase family member 3, mitochondrial OS=Homo sapiens GN=ACSF3 PE=1 SV=3 - [ACSF3_HUMAN]	576	64.1	1.077	0.967	1.012	1.006	0.945	9	9	13	13	5.1	13	19.2	13	14.7	13	19.6	13	21.8
O95573	ACSL3	Long-chain-fatty-acid--CoA ligase 3	Long-chain-fatty-acid--CoA ligase 3 OS=Homo sapiens GN=ACSL3 PE=1 SV=3 - [ACSL3_HUMAN]	720	80.4	1.016	1.074	1.264	1.546	0.938	17	19	37	30	4.8	30	7.6	30	14.2	30	12.8	30	8.1
O60488	ACSL4	Long-chain-fatty-acid--CoA ligase 4	Long-chain-fatty-acid--CoA ligase 4 OS=Homo sapiens GN=ACSL4 PE=1 SV=2 - [ACSL4_HUMAN]	711	79.1	1.039	0.949	1.092	1.218	0.965	22	24	48	41	9.5	41	11.3	41	10.4	41	9.9	41	10.8
Q9ULC5	ACSL5	Long-chain-fatty-acid--CoA ligase 5	Long-chain-fatty-acid--CoA ligase 5 OS=Homo sapiens GN=ACSL5 PE=1 SV=1 - [ACSL5_HUMAN]	683	75.9	1.021	1.255	1.348	1.547	1.074	2	2	2	2	7.6	2	4	2	3.2	2	0.8	2	12.1
E7ETR5	ACSM3		Acyl-coenzyme A synthetase ACSM3, mitochondrial OS=Homo sapiens GN=ACSM3 PE=2 SV=1 - [E7ETR5_HUMAN]	578	65	1.137	1.063	1.056	1.352	0.824	1	1	1	1	NaN	1	NaN	1	NaN	1	NaN	1	NaN
Q9NUB1	ACSS1	Acetyl-coenzyme A synthetase 2-like, mitochondrial	Acetyl-coenzyme A synthetase 2-like, mitochondrial OS=Homo sapiens GN=ACSS1 PE=1 SV=2 - [ACS2L_HUMAN]	689	74.8	1.044	1.033	1.054	1.094	1.039	12	12	13	13	8.9	13	13	13	13.5	13	15.6	13	6
P60709	ACTB	Actin, cytoplasmic 1;Actin, cytoplasmic 1, N-terminally processed	Actin, cytoplasmic 1 OS=Homo sapiens GN=ACTB PE=1 SV=1 - [ACTB_HUMAN]	375	41.7	1.044	0.979	1.038	1.129	1.116	10	22	885	465	9	465	10.8	464	23.1	464	22.5	465	16
Q562R1	ACTBL2	Beta-actin-like protein 2	Beta-actin-like protein 2 OS=Homo sapiens GN=ACTBL2 PE=1 SV=2 - [ACTBL_HUMAN]	376	42	0.964	0.906	0.897	0.979	0.961	2	8	207	4	18.4	4	4.3	4	8.6	4	19.6	4	10.5
P68032	ACTC1	Actin, alpha cardiac muscle 1	Actin, alpha cardiac muscle 1 OS=Homo sapiens GN=ACTC1 PE=1 SV=1 - [ACTC_HUMAN]	377	42	1.044	0.915	0.95	1.016	1.029	1	13	491	94	1.3	94	3.5	94	25.8	94	18.7	94	10.7
O96019	ACTL6A	Actin-like protein 6A	Actin-like protein 6A OS=Homo sapiens GN=ACTL6A PE=1 SV=1 - [ACL6A_HUMAN]	429	47.4	0.994	0.928	0.95	0.909	0.921	15	15	49	49	7.4	49	8	49	9	49	8.7	49	12
P12814	ACTN1	Alpha-actinin-1	Alpha-actinin-1 OS=Homo sapiens GN=ACTN1 PE=1 SV=2 - [ACTN1_HUMAN]	892	103	1.005	1.019	1.198	1.276	1.198	23	42	126	68	6.1	69	8.2	68	9.1	69	8.4	69	9.9
B2RCS5	ACTN2		Actinin, alpha 2, isoform CRA_b OS=Homo sapiens GN=ACTN2 PE=2 SV=1 - [B2RCS5_HUMAN]	894	103.9	0.956	1.067	1.213	1.335	1.225	1	14	46	2	1.1	2	5.7	2	6.4	2	0.8	2	4.9
O43707	ACTN4	Alpha-actinin-4	Alpha-actinin-4 OS=Homo sapiens GN=ACTN4 PE=1 SV=2 - [ACTN4_HUMAN]	911	104.8	1.002	0.956	1.154	1.277	1.051	39	55	162	105	7.2	105	8.3	105	12.1	105	10.9	105	7.1
Q9NZ32	ACTR10	Actin-related protein 10	Actin-related protein 10 OS=Homo sapiens GN=ACTR10 PE=1 SV=1 - [ARP10_HUMAN]	417	46.3	0.961	1.07	1.148	1.195	1.138	5	5	11	10	8.4	10	12.3	10	15.6	10	11.2	10	7.2
R4GMT0	ACTR1A		Alpha-centractin OS=Homo sapiens GN=ACTR1A PE=3 SV=1 - [R4GMT0_HUMAN]	332	37.4	1	1.064	1.179	1.254	1.124	6	12	39	15	5	15	10.8	15	7	15	5.7	15	11.2
P42025	ACTR1B	Beta-centractin	Beta-centractin OS=Homo sapiens GN=ACTR1B PE=1 SV=1 - [ACTY_HUMAN]	376	42.3	1	0.987	0.975	1.069	0.874	4	9	25	5	4.2	5	2.1	5	12.3	5	4.3	5	7.9
P61160	ACTR2	Actin-related protein 2	Actin-related protein 2 OS=Homo sapiens GN=ACTR2 PE=1 SV=1 - [ARP2_HUMAN]	394	44.7	0.975	1.039	1.061	1.133	1.082	9	10	36	32	6.5	32	7.8	32	9.3	32	6.1	32	8.7
P61158	ACTR3	Actin-related protein 3	Actin-related protein 3 OS=Homo sapiens GN=ACTR3 PE=1 SV=3 - [ARP3_HUMAN]	418	47.3	0.984	1.015	1.145	1.261	1.076	17	17	48	48	5.6	48	11.2	48	12.7	48	11.3	48	10.1
Q9H9F9	ACTR5	Actin-related protein 5	Actin-related protein 5 OS=Homo sapiens GN=ACTR5 PE=1 SV=2 - [ARP5_HUMAN]	607	68.3	0.929	1.006	0.82	0.766	0.976	7	7	10	10	16.9	10	13.1	10	19.1	10	14	10	8.9
F8W057	ACTR6		Actin-related protein 6 OS=Homo sapiens GN=ACTR6 PE=2 SV=1 - [F8W057_HUMAN]	376	43.5	0.809	0.96	0.703	0.753	0.832	3	3	3	3	7.3	3	3.7	3	5	3	18.7	3	8.6
Q9H981	ACTR8	Actin-related protein 8	Actin-related protein 8 OS=Homo sapiens GN=ACTR8 PE=1 SV=2 - [ARP8_HUMAN]	624	70.4	0.982	0.944	0.879	0.946	0.818	1	1	1	1	NaN	1	NaN	1	NaN	1	NaN	1	NaN
Q03154	ACY1	Aminoacylase-1	Aminoacylase-1 OS=Homo sapiens GN=ACY1 PE=1 SV=1 - [ACY1_HUMAN]	408	45.9	1.026	0.809	0.801	0.819	0.628	7	7	9	9	2.5	9	14	9	11	9	19.6	9	25.6
P07311	ACYP1	Acylphosphatase-1	Acylphosphatase-1 OS=Homo sapiens GN=ACYP1 PE=1 SV=2 - [ACYP1_HUMAN]	99	11.3	1.07	0.925	0.963	0.964	0.94	4	4	6	6	6.1	6	1.7	6	12.2	6	6.5	6	7.9
E9PF46	ACYP2	Acylphosphatase	Acylphosphatase OS=Homo sapiens GN=ACYP2 PE=2 SV=1 - [E9PF46_HUMAN]	97	10.3	1.001	0.869	0.806	0.875	1.019	2	2	2	2	7.1	2	3.8	2	8.3	2	22.8	2	14.1
P00813	ADA	Adenosine deaminase	Adenosine deaminase OS=Homo sapiens GN=ADA PE=1 SV=3 - [ADA_HUMAN]	363	40.7	1.045	1.009	1.097	1.115	1.26	17	17	40	39	5.6	39	5.5	39	8.7	39	6.4	39	9.8
O14672	ADAM10	Disintegrin and metalloproteinase domain-containing protein 10	Disintegrin and metalloproteinase domain-containing protein 10 OS=Homo sapiens GN=ADAM10 PE=1 SV=1 - [ADA10_HUMAN]	748	84.1	1.053	1.139	1.13	1.286	1.317	9	9	10	10	13.9	10	19.6	10	15.6	10	11.4	10	11.1
P78536	ADAM17	Disintegrin and metalloproteinase domain-containing protein 17	Disintegrin and metalloproteinase domain-containing protein 17 OS=Homo sapiens GN=ADAM17 PE=1 SV=1 - [ADA17_HUMAN]	824	93	1.075	1.071	1.254	1.191	1.232	1	1	1	1	NaN	1	NaN	1	NaN	1	NaN	1	NaN
E7EPF1	ADAM22		Disintegrin and metalloproteinase domain-containing protein 22 OS=Homo sapiens GN=ADAM22 PE=2 SV=1 - [E7EPF1_HUMAN]	342	39.5	2.921	3.124	2.95	3.217	4.216	1	1	1	1	NaN	1	NaN	1	NaN	1	NaN	1	NaN
F8WC54	ADAM9		Disintegrin and metalloproteinase domain-containing protein 9 OS=Homo sapiens GN=ADAM9 PE=2 SV=1 - [F8WC54_HUMAN]	628	69.3	0.954	1.312	1.231	1.028	1.466	1	1	1	1	NaN	1	NaN	1	NaN	1	NaN	1	NaN
P55265	ADAR	Double-stranded RNA-specific adenosine deaminase	Double-stranded RNA-specific adenosine deaminase OS=Homo sapiens GN=ADAR PE=1 SV=4 - [DSRAD_HUMAN]	1226	136	1.015	0.971	0.896	0.863	0.932	41	41	82	81	6.2	81	7.4	81	8.5	81	10.5	81	9.8
H3BP27	ADAT1		tRNA-specific adenosine deaminase 1 (Fragment) OS=Homo sapiens GN=ADAT1 PE=2 SV=1 - [H3BP27_HUMAN]	120	13.6	1.107	1.284	0.893	1.055	1.328	1	1	1	1	NaN	1	NaN	1	NaN	1	NaN	1	NaN
Q7Z6V5	ADAT2	tRNA-specific adenosine deaminase 2	tRNA-specific adenosine deaminase 2 OS=Homo sapiens GN=ADAT2 PE=1 SV=1 - [ADAT2_HUMAN]	191	21	1	0.944	0.894	0.82	1.021	3	3	3	3	5.5	3	15.9	3	20.3	3	8.9	3	6.9
Q5T7A2	ADCK3		Chaperone activity of bc1 complex-like, mitochondrial OS=Homo sapiens GN=ADCK3 PE=2 SV=1 - [Q5T7A2_HUMAN]	492	55.9	1.038	0.722	0.66	0.534	0.612	5	5	5	5	26.9	5	4.4	5	54.5	5	8.5	5	4.9
E7EV99	ADD1		Alpha-adducin OS=Homo sapiens GN=ADD1 PE=2 SV=1 - [E7EV99_HUMAN]	632	70	0.95	1.138	1.245	1.168	1.272	12	12	18	18	9.9	18	8.7	18	12.1	18	19	18	11.3
Q9UEY8	ADD3	Gamma-adducin	Gamma-adducin OS=Homo sapiens GN=ADD3 PE=1 SV=1 - [ADDG_HUMAN]	706	79.1	0.965	1.131	1.231	1.104	1.204	7	7	9	9	10.1	9	5.2	9	6.5	9	12.7	9	13.1
P11766	ADH5	Alcohol dehydrogenase class-3	Alcohol dehydrogenase class-3 OS=Homo sapiens GN=ADH5 PE=1 SV=4 - [ADHX_HUMAN]	374	39.7	1.078	1.01	1.137	1.237	1.088	15	15	31	30	5.1	30	7.9	30	12.6	30	9.8	30	13.8
Q9BV57	ADI1	1,2-dihydroxy-3-keto-5-methylthiopentene dioxygenase	1,2-dihydroxy-3-keto-5-methylthiopentene dioxygenase OS=Homo sapiens GN=ADI1 PE=1 SV=1 - [MTND_HUMAN]	179	21.5	1.022	0.82	0.674	0.605	0.816	6	6	8	8	5	8	12.8	8	13.7	8	11.3	8	7.8
P55263	ADK	Adenosine kinase	Adenosine kinase OS=Homo sapiens GN=ADK PE=1 SV=2 - [ADK_HUMAN]	362	40.5	1.057	1.088	1.178	1.093	0.953	10	10	21	21	8.8	21	8.7	21	16.7	21	16.2	21	13
Q9H2P0	ADNP	Activity-dependent neuroprotector homeobox protein	Activity-dependent neuroprotector homeobox protein OS=Homo sapiens GN=ADNP PE=1 SV=1 - [ADNP_HUMAN]	1102	123.5	1.038	1.018	0.987	0.956	1.113	25	25	38	38	8.5	38	7.1	38	14.2	38	13.7	38	10.2
H0YLN6	ADNP2		ADNP homeobox protein 2 (Fragment) OS=Homo sapiens GN=ADNP2 PE=2 SV=1 - [H0YLN6_HUMAN]	171	19.8	0.931	0.823	0.725	0.625	0.75	1	1	2	2	4.8	2	0.8	2	1.2	2	6.7	2	4.6
Q96SZ5	ADO	2-aminoethanethiol dioxygenase	2-aminoethanethiol dioxygenase OS=Homo sapiens GN=ADO PE=1 SV=2 - [AEDO_HUMAN]	270	29.7	0.974	1.01	1.029	1.13	1.035	6	6	6	6	4.1	6	9	6	10.8	6	7.1	6	5.5
H3BRS6	ADPGK		ADP-dependent glucokinase (Fragment) OS=Homo sapiens GN=ADPGK PE=4 SV=1 - [H3BRS6_HUMAN]	204	21.9	0.925	1.079	1.147	1.381	1.058	1	1	2	2	2.4	2	0.1	2	1.1	2	3.4	2	3.4
Q9NX46	ADPRHL2	Poly(ADP-ribose) glycohydrolase ARH3	Poly(ADP-ribose) glycohydrolase ARH3 OS=Homo sapiens GN=ADPRHL2 PE=1 SV=1 - [ARHL2_HUMAN]	363	38.9	1.008	0.925	1.033	1.018	0.922	7	7	10	10	6.3	10	4.5	10	17.3	10	11.9	10	7.4
P25098	ADRBK1	Beta-adrenergic receptor kinase 1	Beta-adrenergic receptor kinase 1 OS=Homo sapiens GN=ADRBK1 PE=1 SV=2 - [ARBK1_HUMAN]	689	79.5	0.958	0.987	0.963	0.939	1.049	11	18	31	18	9.7	18	9.7	18	19.6	18	14.9	18	8.4
P35626	ADRBK2	Beta-adrenergic receptor kinase 2	Beta-adrenergic receptor kinase 2 OS=Homo sapiens GN=ADRBK2 PE=2 SV=2 - [ARBK2_HUMAN]	688	79.7	0.967	1.208	1.084	0.911	1.651	8	15	23	9	6.3	9	17.4	9	25.7	9	12.7	9	11.6
Q16186	ADRM1	Proteasomal ubiquitin receptor ADRM1	Proteasomal ubiquitin receptor ADRM1 OS=Homo sapiens GN=ADRM1 PE=1 SV=2 - [ADRM1_HUMAN]	407	42.1	1.032	1.051	1.149	1.181	1.105	6	6	14	14	9	14	5.4	14	14.7	14	12.3	14	15.4
P30566	ADSL	Adenylosuccinate lyase	Adenylosuccinate lyase OS=Homo sapiens GN=ADSL PE=1 SV=2 - [PUR8_HUMAN]	484	54.9	1.023	0.965	0.914	0.907	0.906	13	13	27	27	8.4	27	9.7	27	10.7	27	7.3	27	7.8
P30520	ADSS	Adenylosuccinate synthetase isozyme 2	Adenylosuccinate synthetase isozyme 2 OS=Homo sapiens GN=ADSS PE=1 SV=3 - [PURA2_HUMAN]	456	50.1	0.979	0.911	0.77	0.628	0.826	17	17	42	42	4.6	42	7.8	42	17.8	42	15.4	42	6.1
H0YH08	AEBP2		Zinc finger protein AEBP2 (Fragment) OS=Homo sapiens GN=AEBP2 PE=2 SV=1 - [H0YH08_HUMAN]	130	15	1.044	0.915	0.801	0.909	1.003	1	1	1	1	NaN	1	NaN	1	NaN	1	NaN	1	NaN
K7EQH5	AES		Amino-terminal enhancer of split OS=Homo sapiens GN=AES PE=4 SV=1 - [K7EQH5_HUMAN]	141	15.5	0.897	1.062	0.897	0.872	1.11	1	1	1	1	NaN	1	NaN	1	NaN	1	NaN	1	NaN
F5GXF9	AFF1		AF4/FMR2 family member 1 OS=Homo sapiens GN=AFF1 PE=2 SV=1 - [F5GXF9_HUMAN]	849	91.6	1.032	1.247	1.15	1.042	0.894	1	1	1	1	NaN	1	NaN	1	NaN	1	NaN	1	NaN
Q9UHB7	AFF4	AF4/FMR2 family member 4	AF4/FMR2 family member 4 OS=Homo sapiens GN=AFF4 PE=1 SV=1 - [AFF4_HUMAN]	1163	127.4	1.057	1.253	1.119	1.325	1.154	4	4	8	8	18.5	8	21.4	8	16.4	8	8.7	8	13.5
Q9Y4W6	AFG3L2	AFG3-like protein 2	AFG3-like protein 2 OS=Homo sapiens GN=AFG3L2 PE=1 SV=2 - [AFG32_HUMAN]	797	88.5	1.03	0.935	0.946	0.942	0.861	27	27	38	38	5.3	38	5.3	38	7.7	38	8.9	38	7.9
Q6ULP2	AFTPH	Aftiphilin	Aftiphilin OS=Homo sapiens GN=AFTPH PE=1 SV=2 - [AFTIN_HUMAN]	937	102.1	1.054	1.056	0.991	0.961	0.969	6	6	7	7	5.3	7	17.8	7	12.5	7	9.9	7	16.8
P20933	AGA	Glycosylasparaginase alpha chain;Glycosylasparaginase beta chain;N(4)-(beta-N-acetylglucosaminyl)-L-asparaginase	N(4)-(beta-N-acetylglucosaminyl)-L-asparaginase OS=Homo sapiens GN=AGA PE=1 SV=2 - [ASPG_HUMAN]	346	37.2	1.135	1.298	1.374	1.629	1.657	2	2	3	3	7.9	3	12.9	3	38.4	3	33.5	3	35.2
J3KNM6	AGAP2		Arf-GAP with GTPase, ANK repeat and PH domain-containing protein 2 (Fragment) OS=Homo sapiens GN=AGAP2 PE=4 SV=1 - [J3KNM6_HUMAN]	1036	108.6	0.929	1.064	1.265	1.542	1.054	6	6	6	6	12.3	6	8.5	6	14.5	6	15.8	6	12.6
R4GNB7	AGAP8		Arf-GAP with GTPase, ANK repeat and PH domain-containing protein 8 OS=Homo sapiens GN=AGAP8 PE=4 SV=1 - [R4GNB7_HUMAN]	647	71.4	1.044	0.915	0.801	0.909	1.003	1	1	1	1	NaN	1	NaN	1	NaN	1	NaN	1	NaN
P52594	AGFG1	Arf-GAP domain and FG repeat-containing protein 1	Arf-GAP domain and FG repeat-containing protein 1 OS=Homo sapiens GN=AGFG1 PE=1 SV=2 - [AGFG1_HUMAN]	562	58.2	1	0.945	0.935	0.981	1.015	9	9	13	13	8.1	13	9.3	13	10.8	13	11	13	9.3
Q8N302	AGGF1	Angiogenic factor with G patch and FHA domains 1	Angiogenic factor with G patch and FHA domains 1 OS=Homo sapiens GN=AGGF1 PE=1 SV=2 - [AGGF1_HUMAN]	714	80.9	0.954	1.053	1.062	1.013	1.251	1	1	1	1	NaN	1	NaN	1	NaN	1	NaN	1	NaN
E9PC15	AGK		Acylglycerol kinase, mitochondrial OS=Homo sapiens GN=AGK PE=2 SV=1 - [E9PC15_HUMAN]	394	43.8	0.989	1.012	1.059	1.082	0.888	13	13	32	30	5.9	30	10.1	30	8.3	30	10.4	30	14.5
P35573	AGL	4-alpha-glucanotransferase;Amylo-alpha-1,6-glucosidase;Glycogen debranching enzyme	Glycogen debranching enzyme OS=Homo sapiens GN=AGL PE=1 SV=3 - [GDE_HUMAN]	1532	174.7	1.003	1.093	1.221	1.286	1.318	42	42	57	54	8.9	54	8.8	54	9	54	8.4	54	10.9
Q9BSE5	AGMAT	Agmatinase, mitochondrial	Agmatinase, mitochondrial OS=Homo sapiens GN=AGMAT PE=1 SV=2 - [SPEB_HUMAN]	352	37.6	1.016	0.999	0.957	0.935	0.921	1	1	1	1	NaN	1	NaN	1	NaN	1	NaN	1	NaN
Q5TA58	AGO1		Protein argonaute-1 OS=Homo sapiens GN=AGO1 PE=2 SV=1 - [Q5TA58_HUMAN]	782	88.8	0.926	1.05	0.984	1.223	1.224	3	7	7	3	0.3	3	9.5	3	0.9	3	18.2	3	3.7
Q9HBM8	AGPAT1		1-acyl-sn-glycerol-3-phosphate acyltransferase alpha OS=Homo sapiens GN=AGPAT1 PE=2 SV=1 - [Q9HBM8_HUMAN]	171	18.7	1.097	1.155	1.287	1.527	1.24	3	3	5	5	6.5	5	18.6	5	18.7	5	15.1	5	9
O15120	AGPAT2	1-acyl-sn-glycerol-3-phosphate acyltransferase beta	1-acyl-sn-glycerol-3-phosphate acyltransferase beta OS=Homo sapiens GN=AGPAT2 PE=1 SV=1 - [PLCB_HUMAN]	278	30.9	1.03	1.068	1.081	1.297	1.11	2	2	2	2	9.6	2	17.9	2	17.5	2	31.4	2	28.1
Q9NRZ7	AGPAT3	1-acyl-sn-glycerol-3-phosphate acyltransferase gamma	1-acyl-sn-glycerol-3-phosphate acyltransferase gamma OS=Homo sapiens GN=AGPAT3 PE=1 SV=1 - [PLCC_HUMAN]	376	43.4	0.979	0.921	1.059	1.221	0.964	7	7	8	8	9.1	8	2.4	8	8.1	8	7.7	8	11.8
Q9NUQ2	AGPAT5	1-acyl-sn-glycerol-3-phosphate acyltransferase epsilon	1-acyl-sn-glycerol-3-phosphate acyltransferase epsilon OS=Homo sapiens GN=AGPAT5 PE=1 SV=3 - [PLCE_HUMAN]	364	42	0.983	0.871	0.839	0.877	0.857	5	5	13	13	5	13	9.6	13	8.1	13	12.8	13	6
Q86UL3	AGPAT6	Glycerol-3-phosphate acyltransferase 4	Glycerol-3-phosphate acyltransferase 4 OS=Homo sapiens GN=AGPAT6 PE=1 SV=1 - [GPAT4_HUMAN]	456	52	0.981	1.084	1.158	1.182	0.974	5	5	7	7	8.7	7	18.4	7	17.2	7	21.8	7	12.2
O00116	AGPS	Alkyldihydroxyacetonephosphate synthase, peroxisomal	Alkyldihydroxyacetonephosphate synthase, peroxisomal OS=Homo sapiens GN=AGPS PE=1 SV=1 - [ADAS_HUMAN]	658	72.9	0.99	0.995	1.053	1.1	0.961	24	24	46	46	4.7	46	9.7	46	10.9	46	8.4	46	6.3
Q8WYP5	AHCTF1	Protein ELYS	Protein ELYS OS=Homo sapiens GN=AHCTF1 PE=1 SV=3 - [ELYS_HUMAN]	2266	252.3	1.011	0.954	0.895	0.849	0.937	33	33	44	44	7.8	44	11.6	44	15.1	44	14.5	44	9.9
P23526	AHCY	Adenosylhomocysteinase	Adenosylhomocysteinase OS=Homo sapiens GN=AHCY PE=1 SV=4 - [SAHH_HUMAN]	432	47.7	1.044	0.926	0.862	0.826	0.824	19	20	71	66	5.5	66	7.3	66	10.1	66	11.7	66	9.3
O43865	AHCYL1	Putative adenosylhomocysteinase 2	Putative adenosylhomocysteinase 2 OS=Homo sapiens GN=AHCYL1 PE=1 SV=2 - [SAHH2_HUMAN]	530	58.9	1.008	1.377	1.373	1.26	1.872	8	22	48	22	6.3	22	21.8	22	21.6	22	12.3	22	16.9
Q96HN2	AHCYL2	Putative adenosylhomocysteinase 3	Putative adenosylhomocysteinase 3 OS=Homo sapiens GN=AHCYL2 PE=1 SV=1 - [SAHH3_HUMAN]	611	66.7	0.919	0.992	1.184	1.352	1.139	3	18	32	4	7.4	4	4.1	4	7.7	4	18.3	4	7.7
O95433	AHSA1	Activator of 90 kDa heat shock protein ATPase homolog 1	Activator of 90 kDa heat shock protein ATPase homolog 1 OS=Homo sapiens GN=AHSA1 PE=1 SV=1 - [AHSA1_HUMAN]	338	38.3	0.978	0.964	0.916	0.863	0.808	16	16	54	51	6.9	51	16.6	51	12.7	51	11.5	51	14.6
F5H715	AIDA		Axin interactor, dorsalization-associated protein OS=Homo sapiens GN=AIDA PE=2 SV=1 - [F5H715_HUMAN]	282	32	0.971	1.101	1.095	1.207	1.221	4	4	4	4	7.5	4	2.8	4	16.8	4	10.3	4	14.2
P55008	AIF1	Allograft inflammatory factor 1	Allograft inflammatory factor 1 OS=Homo sapiens GN=AIF1 PE=1 SV=1 - [AIF1_HUMAN]	147	16.7	0.85	0.485	0.237	0.233	0.313	1	1	2	2	7.3	2	1.5	2	71.3	2	30.2	2	1.6
O95831	AIFM1	Apoptosis-inducing factor 1, mitochondrial	Apoptosis-inducing factor 1, mitochondrial OS=Homo sapiens GN=AIFM1 PE=1 SV=1 - [AIFM1_HUMAN]	613	66.9	1.044	1.015	1.061	1.108	0.987	16	16	45	44	6.5	45	8.5	45	7.4	45	9.1	45	7.9
Q9Y4K1	AIM1	Absent in melanoma 1 protein	Absent in melanoma 1 protein OS=Homo sapiens GN=AIM1 PE=1 SV=3 - [AIM1_HUMAN]	1723	188.6	0.945	1.263	1.188	1.196	1.303	29	29	46	45	8.3	45	16.6	45	18.3	45	19.7	45	18
Q12904	AIMP1	Aminoacyl tRNA synthase complex-interacting multifunctional protein 1;Endothelial monocyte-activating polypeptide 2	Aminoacyl tRNA synthase complex-interacting multifunctional protein 1 OS=Homo sapiens GN=AIMP1 PE=1 SV=2 - [AIMP1_HUMAN]	312	34.3	1.019	0.994	0.931	0.878	0.891	11	12	31	28	4.1	28	9.7	28	8.5	28	6.5	28	9.1
Q13155	AIMP2	Aminoacyl tRNA synthase complex-interacting multifunctional protein 2	Aminoacyl tRNA synthase complex-interacting multifunctional protein 2 OS=Homo sapiens GN=AIMP2 PE=1 SV=2 - [AIMP2_HUMAN]	320	35.3	0.932	0.908	0.907	0.801	0.809	1	7	18	2	4.1	2	8.4	2	7.2	2	18.2	2	5.9
F8W950	AIMP2		Aminoacyl tRNA synthase complex-interacting multifunctional protein 2 OS=Homo sapiens GN=AIMP2 PE=2 SV=1 - [F8W950_HUMAN]	251	27.8	1.035	1.071	1.121	1.036	1.013	1	7	17	1	NaN	1	NaN	1	NaN	1	NaN	1	NaN
O00170	AIP	AH receptor-interacting protein	AH receptor-interacting protein OS=Homo sapiens GN=AIP PE=1 SV=2 - [AIP_HUMAN]	330	37.6	1.005	1.099	1.009	0.964	1.093	14	14	33	33	7.2	33	8.7	33	10.6	33	10.3	33	9.5
F8W1A4	AK2		Adenylate kinase 2, mitochondrial OS=Homo sapiens GN=AK2 PE=2 SV=1 - [F8W1A4_HUMAN]	232	25.6	1.044	0.946	0.966	0.873	0.862	11	11	40	40	6.3	40	5.1	40	8.6	40	7.2	40	11.4
Q9UIJ7	AK3	GTP:AMP phosphotransferase AK3, mitochondrial	GTP:AMP phosphotransferase AK3, mitochondrial OS=Homo sapiens GN=AK3 PE=1 SV=4 - [KAD3_HUMAN]	227	25.5	1.039	0.981	1.266	1.595	1.052	8	8	10	10	3.5	10	10.4	10	5.3	10	11.3	10	4
P27144	AK4	GTP:AMP phosphotransferase AK4, mitochondrial	Adenylate kinase 4, mitochondrial OS=Homo sapiens GN=AK4 PE=1 SV=1 - [KAD4_HUMAN]	223	25.3	1.049	0.891	1.036	0.958	0.849	7	7	9	9	5.3	9	3.3	9	10.3	9	8.8	9	2
Q92667	AKAP1	A-kinase anchor protein 1, mitochondrial	A-kinase anchor protein 1, mitochondrial OS=Homo sapiens GN=AKAP1 PE=1 SV=1 - [AKAP1_HUMAN]	903	97.3	0.858	0.866	0.628	0.496	0.812	6	6	6	6	3.3	6	7.9	6	24.9	6	11.1	6	7
E7EMD6	AKAP10		A-kinase anchor protein 10, mitochondrial OS=Homo sapiens GN=AKAP10 PE=2 SV=3 - [E7EMD6_HUMAN]	604	67.7	1.105	0.992	1.11	1.223	1.038	2	2	2	2	3.7	2	3.8	2	8.2	2	8.7	2	23.7
Q9UKA4	AKAP11	A-kinase anchor protein 11	A-kinase anchor protein 11 OS=Homo sapiens GN=AKAP11 PE=1 SV=1 - [AKA11_HUMAN]	1901	210.4	0.916	1.181	1.067	0.989	1.028	4	4	4	4	10.6	4	13	4	18.2	4	11.4	4	10.2
A8MYJ1	AKAP13		A kinase (PRKA) anchor protein 13, isoform CRA_a OS=Homo sapiens GN=AKAP13 PE=2 SV=2 - [A8MYJ1_HUMAN]	1058	120.1	0.948	1.063	1.177	1.432	1.049	2	2	2	2	23.3	2	9.8	2	46.6	2	66.1	2	20.7
Q02040	AKAP17A	A-kinase anchor protein 17A	A-kinase anchor protein 17A OS=Homo sapiens GN=AKAP17A PE=1 SV=2 - [AK17A_HUMAN]	695	80.7	1.066	0.975	1.138	1.163	1.05	3	3	3	3	7.6	3	19.4	3	4.5	3	14.2	3	12.9
Q9Y2D5	AKAP2	A-kinase anchor protein 2	A-kinase anchor protein 2 OS=Homo sapiens GN=AKAP2 PE=1 SV=3 - [AKAP2_HUMAN]	859	94.6	1	1.038	0.661	0.518	1.005	14	14	18	18	8.8	18	10.9	18	15.2	18	14.7	18	7.2
O43823	AKAP8	A-kinase anchor protein 8	A-kinase anchor protein 8 OS=Homo sapiens GN=AKAP8 PE=1 SV=1 - [AKAP8_HUMAN]	692	76.1	0.948	0.803	0.677	0.683	0.724	12	12	16	16	6.5	16	12.9	16	11.7	16	11.9	16	5.7
Q9ULX6	AKAP8L	A-kinase anchor protein 8-like	A-kinase anchor protein 8-like OS=Homo sapiens GN=AKAP8L PE=1 SV=3 - [AKP8L_HUMAN]	646	71.6	0.87	0.701	0.727	0.76	0.737	6	6	7	7	5.2	7	17	7	23.2	7	30.7	7	20.6
Q99996	AKAP9	A-kinase anchor protein 9	A-kinase anchor protein 9 OS=Homo sapiens GN=AKAP9 PE=1 SV=3 - [AKAP9_HUMAN]	3911	453.4	0.944	1.141	0.935	0.884	1.253	17	18	20	18	17.8	18	14.2	18	25.3	18	20.6	18	13
Q7Z591	AKNA	AT-hook-containing transcription factor	AT-hook-containing transcription factor OS=Homo sapiens GN=AKNA PE=1 SV=2 - [AKNA_HUMAN]	1439	155	1.026	1.04	1.056	0.982	1.01	3	3	5	5	6.7	5	7.1	5	12.1	5	16.6	5	6.7
P14550	AKR1A1	Alcohol dehydrogenase [NADP(+)]	Alcohol dehydrogenase [NADP(+)] OS=Homo sapiens GN=AKR1A1 PE=1 SV=3 - [AK1A1_HUMAN]	325	36.5	1.043	1.045	1.232	1.308	1.041	15	15	32	32	8.2	32	8.2	32	9.1	32	14.4	32	11
P15121	AKR1B1	Aldose reductase	Aldose reductase OS=Homo sapiens GN=AKR1B1 PE=1 SV=3 - [ALDR_HUMAN]	316	35.8	1.028	0.855	1.045	1.085	0.88	10	10	16	16	5.6	16	7.5	16	7.4	16	5.8	16	9.5
Q04828	AKR1C1	Aldo-keto reductase family 1 member C1	Aldo-keto reductase family 1 member C1 OS=Homo sapiens GN=AKR1C1 PE=1 SV=1 - [AK1C1_HUMAN]	323	36.8	1.044	1.999	2.895	2.815	3.231	3	10	17	3	11.7	3	36.4	3	18.7	3	31.7	3	20.1
P42330	AKR1C3	Aldo-keto reductase family 1 member C3	Aldo-keto reductase family 1 member C3 OS=Homo sapiens GN=AKR1C3 PE=1 SV=4 - [AK1C3_HUMAN]	323	36.8	1.064	1.348	1.567	1.654	1.457	6	13	27	13	8.7	13	17.9	13	16.3	13	9.7	13	9.6
H3BLU7	AKR7A2		Aflatoxin B1 aldehyde reductase member 2 (Fragment) OS=Homo sapiens GN=AKR7A2 PE=2 SV=1 - [H3BLU7_HUMAN]	314	34.7	1.046	0.863	0.916	0.956	0.93	9	9	14	14	5.6	14	9.6	14	9	14	10	14	9.2
P31749	AKT1	RAC-alpha serine/threonine-protein kinase	RAC-alpha serine/threonine-protein kinase OS=Homo sapiens GN=AKT1 PE=1 SV=2 - [AKT1_HUMAN]	480	55.7	1.004	0.961	1.042	1.189	1.285	6	8	9	7	6.5	7	13.1	7	18.4	7	1.8	7	6.2
P31751	AKT2	RAC-beta serine/threonine-protein kinase	RAC-beta serine/threonine-protein kinase OS=Homo sapiens GN=AKT2 PE=1 SV=2 - [AKT2_HUMAN]	481	55.7	1.032	1.202	1.179	1.247	1.166	3	5	6	4	7.2	4	8.6	4	10.6	4	13.5	4	7
B7Z3I9	ALAD	Delta-aminolevulinic acid dehydratase	Delta-aminolevulinic acid dehydratase OS=Homo sapiens GN=ALAD PE=2 SV=1 - [B7Z3I9_HUMAN]	313	34.5	1.053	1.02	1.22	1.425	1.103	7	7	11	11	5.2	11	10.1	11	16.9	11	8.1	11	11.5
P13196	ALAS1	5-aminolevulinate synthase, nonspecific, mitochondrial	5-aminolevulinate synthase, nonspecific, mitochondrial OS=Homo sapiens GN=ALAS1 PE=1 SV=2 - [HEM1_HUMAN]	640	70.5	1.056	1.045	1.005	0.934	0.939	1	1	1	1	NaN	1	NaN	1	NaN	1	NaN	1	NaN
H0YA55	ALB		Serum albumin (Fragment) OS=Homo sapiens GN=ALB PE=4 SV=1 - [H0YA55_HUMAN]	454	51.5	1.273	0.888	0.751	1.291	0.79	2	2	2	2	0.5	2	1.8	2	5.6	2	2.5	2	6.1
Q13740	ALCAM	CD166 antigen	CD166 antigen OS=Homo sapiens GN=ALCAM PE=1 SV=2 - [CD166_HUMAN]	583	65.1	0.988	1.117	0.891	0.763	1.113	12	12	20	19	4.8	19	3.6	19	11.6	19	12.2	19	5.1
Q8IZ83	ALDH16A1	Aldehyde dehydrogenase family 16 member A1	Aldehyde dehydrogenase family 16 member A1 OS=Homo sapiens GN=ALDH16A1 PE=1 SV=2 - [A16A1_HUMAN]	802	85.1	1.027	1.044	1.25	1.41	1.21	13	13	16	15	5.8	16	13.7	15	13	16	11.8	16	13.7
P54886	ALDH18A1	Delta-1-pyrroline-5-carboxylate synthase;Gamma-glutamyl phosphate reductase;Glutamate 5-kinase	Delta-1-pyrroline-5-carboxylate synthase OS=Homo sapiens GN=ALDH18A1 PE=1 SV=2 - [P5CS_HUMAN]	795	87.2	0.968	1.018	0.92	0.877	0.918	30	30	62	62	8.7	62	7.9	62	12.4	62	9.3	62	9.5
P00352	ALDH1A1	Retinal dehydrogenase 1	Retinal dehydrogenase 1 OS=Homo sapiens GN=ALDH1A1 PE=1 SV=2 - [AL1A1_HUMAN]	501	54.8	1.335	1.138	1.398	1.317	1.118	2	2	2	2	13.4	2	21.1	2	25.4	2	29.9	2	16.2
H0YMG7	ALDH1A2		Retinal dehydrogenase 2 OS=Homo sapiens GN=ALDH1A2 PE=2 SV=1 - [H0YMG7_HUMAN]	489	53.7	0.989	0.714	0.62	0.608	0.758	4	4	5	5	8.2	5	30.2	5	116	5	100.6	5	2.6
P30837	ALDH1B1	Aldehyde dehydrogenase X, mitochondrial	Aldehyde dehydrogenase X, mitochondrial OS=Homo sapiens GN=ALDH1B1 PE=1 SV=3 - [AL1B1_HUMAN]	517	57.2	0.986	0.902	0.915	0.823	0.747	10	10	17	17	5.7	17	10.4	17	7.8	17	12.5	17	13.9
P30038	ALDH4A1	Delta-1-pyrroline-5-carboxylate dehydrogenase, mitochondrial	Delta-1-pyrroline-5-carboxylate dehydrogenase, mitochondrial OS=Homo sapiens GN=ALDH4A1 PE=1 SV=3 - [AL4A1_HUMAN]	563	61.7	1.056	1.061	1.304	1.458	1.318	14	14	16	16	9.2	16	5.9	16	9.9	16	8.6	16	9.1
P51649	ALDH5A1	Succinate-semialdehyde dehydrogenase, mitochondrial	Succinate-semialdehyde dehydrogenase, mitochondrial OS=Homo sapiens GN=ALDH5A1 PE=1 SV=2 - [SSDH_HUMAN]	535	57.2	0.985	0.925	0.986	1.036	0.941	11	11	21	20	10.2	20	17.3	20	14.1	20	11.6	20	16.6
J3KNU8	ALDH6A1		Methylmalonate-semialdehyde dehydrogenase [acylating], mitochondrial OS=Homo sapiens GN=ALDH6A1 PE=3 SV=1 - [J3KNU8_HUMAN]	522	56.2	1.057	0.862	1.097	1.18	0.922	17	17	27	27	6.1	27	6.3	27	5.8	27	6	27	8.1
P49419	ALDH7A1	Alpha-aminoadipic semialdehyde dehydrogenase	Alpha-aminoadipic semialdehyde dehydrogenase OS=Homo sapiens GN=ALDH7A1 PE=1 SV=5 - [AL7A1_HUMAN]	539	58.5	0.993	1.166	1.252	1.109	1.239	1	1	1	1	NaN	1	NaN	1	NaN	1	NaN	1	NaN
P49189	ALDH9A1	4-trimethylaminobutyraldehyde dehydrogenase	4-trimethylaminobutyraldehyde dehydrogenase OS=Homo sapiens GN=ALDH9A1 PE=1 SV=3 - [AL9A1_HUMAN]	494	53.8	1.045	0.985	1.136	1.247	1.021	18	18	46	44	4	44	6.8	44	9.3	44	9.5	44	6.9
P04075	ALDOA	Fructose-bisphosphate aldolase A	Fructose-bisphosphate aldolase A OS=Homo sapiens GN=ALDOA PE=1 SV=2 - [ALDOA_HUMAN]	364	39.4	1.044	0.896	1.019	0.966	0.767	23	28	402	307	9.9	307	12.8	307	17.6	307	13.1	307	17.6
P09972	ALDOC	Fructose-bisphosphate aldolase C	Fructose-bisphosphate aldolase C OS=Homo sapiens GN=ALDOC PE=1 SV=2 - [ALDOC_HUMAN]	364	39.4	1.058	0.785	0.927	1.029	0.752	17	24	222	128	9.6	128	16.4	128	14.7	128	11.7	128	14.4
B4DP08	ALG1		Chitobiosyldiphosphodolichol beta-mannosyltransferase OS=Homo sapiens GN=ALG1 PE=2 SV=1 - [B4DP08_HUMAN]	353	40.3	0.989	0.958	1.023	1.075	0.9	5	5	6	6	5.5	6	6.9	6	16.1	6	2.5	6	9.7
Q5BKT4	ALG10	Dol-P-Glc:Glc(2)Man(9)GlcNAc(2)-PP-Dol alpha-1,2-glucosyltransferase	Dol-P-Glc:Glc(2)Man(9)GlcNAc(2)-PP-Dol alpha-1,2-glucosyltransferase OS=Homo sapiens GN=ALG10 PE=2 SV=1 - [AG10A_HUMAN]	473	55.6	1.061	0.949	0.988	1.107	1.027	2	2	2	2	2.5	2	5.4	2	31.9	2	29.9	2	3.6
Q2TAA5	ALG11	GDP-Man:Man(3)GlcNAc(2)-PP-Dol alpha-1,2-mannosyltransferase	GDP-Man:Man(3)GlcNAc(2)-PP-Dol alpha-1,2-mannosyltransferase OS=Homo sapiens GN=ALG11 PE=1 SV=2 - [ALG11_HUMAN]	492	55.6	0.94	1.015	1.163	1.435	0.934	2	2	3	3	1.4	3	7.7	3	6	3	4.7	3	3.4
H7C4I6	ALG12		Dol-P-Man:Man(7)GlcNAc(2)-PP-Dol alpha-1,6-mannosyltransferase (Fragment) OS=Homo sapiens GN=ALG12 PE=4 SV=1 - [H7C4I6_HUMAN]	196	22.1	1.016	0.92	0.977	1.067	0.943	1	1	1	1	NaN	1	NaN	1	NaN	1	NaN	1	NaN
D6RE84	ALG13		UDP-N-acetylglucosamine transferase subunit ALG13 homolog (Fragment) OS=Homo sapiens GN=ALG13 PE=2 SV=1 - [D6RE84_HUMAN]	222	24.3	1.002	1.059	1.116	1.304	1.156	3	3	4	4	6.2	4	15.6	4	10	4	11.9	4	7.5
Q9H553	ALG2	Alpha-1,3/1,6-mannosyltransferase ALG2	Alpha-1,3/1,6-mannosyltransferase ALG2 OS=Homo sapiens GN=ALG2 PE=1 SV=1 - [ALG2_HUMAN]	416	47.1	1.044	1.042	1.214	1.114	0.992	2	2	2	2	16.6	2	17.5	2	5.2	2	0.1	2	8.1
H7C0X4	ALG3		Dol-P-Man:Man(5)GlcNAc(2)-PP-Dol alpha-1,3-mannosyltransferase (Fragment) OS=Homo sapiens GN=ALG3 PE=4 SV=1 - [H7C0X4_HUMAN]	323	37	1.081	1.025	0.882	0.919	0.873	2	2	4	4	8	4	17.4	4	13.9	4	21.7	4	5.9
Q9Y673	ALG5	Dolichyl-phosphate beta-glucosyltransferase	Dolichyl-phosphate beta-glucosyltransferase OS=Homo sapiens GN=ALG5 PE=1 SV=1 - [ALG5_HUMAN]	324	36.9	1.027	1.033	1.008	1.066	0.859	8	8	13	13	10.1	13	11.7	13	8.1	13	8.7	13	9.5
Q9Y672	ALG6	Dolichyl pyrophosphate Man9GlcNAc2 alpha-1,3-glucosyltransferase	Dolichyl pyrophosphate Man9GlcNAc2 alpha-1,3-glucosyltransferase OS=Homo sapiens GN=ALG6 PE=1 SV=1 - [ALG6_HUMAN]	507	58.1	1.003	1.058	1.166	1.349	1.125	4	4	5	5	5.9	5	16.1	5	16.9	5	15.9	5	17.2
H0YDD3	ALG8		Probable dolichyl pyrophosphate Glc1Man9GlcNAc2 alpha-1,3-glucosyltransferase (Fragment) OS=Homo sapiens GN=ALG8 PE=2 SV=1 - [H0YDD3_HUMAN]	226	25.5	1.016	0.927	0.975	0.964	0.799	2	2	3	3	3.2	3	7.7	3	0.8	3	2.3	3	10.8
Q9H6U8	ALG9	Alpha-1,2-mannosyltransferase ALG9	Alpha-1,2-mannosyltransferase ALG9 OS=Homo sapiens GN=ALG9 PE=1 SV=2 - [ALG9_HUMAN]	611	69.8	1.023	0.934	0.969	0.985	0.927	2	2	2	2	6.2	2	9.1	2	6.6	2	12.3	2	5.1
H0YJF3	ALKBH1		Alkylated DNA repair protein alkB homolog 1 (Fragment) OS=Homo sapiens GN=ALKBH1 PE=2 SV=1 - [H0YJF3_HUMAN]	112	12	1.201	1.169	1.047	0.957	1.21	1	1	1	1	NaN	1	NaN	1	NaN	1	NaN	1	NaN
F5GZZ0	ALKBH2		Alpha-ketoglutarate-dependent dioxygenase alkB homolog 2 (Fragment) OS=Homo sapiens GN=ALKBH2 PE=2 SV=1 - [F5GZZ0_HUMAN]	121	13.4	0.726	0.977	0.719	0.611	1.028	1	1	2	2	7.9	2	9.3	2	3.8	2	24.3	2	5.6
E9PN35	ALKBH3		Alpha-ketoglutarate-dependent dioxygenase alkB homolog 3 OS=Homo sapiens GN=ALKBH3 PE=2 SV=1 - [E9PN35_HUMAN]	171	19.4	0.857	1.061	0.876	0.761	0.921	1	1	1	1	NaN	1	NaN	1	NaN	1	NaN	1	NaN
Q9NXW9	ALKBH4	Alpha-ketoglutarate-dependent dioxygenase alkB homolog 4	Alpha-ketoglutarate-dependent dioxygenase alkB homolog 4 OS=Homo sapiens GN=ALKBH4 PE=1 SV=1 - [ALKB4_HUMAN]	302	33.8	0.929	0.988	1.018	0.999	1.079	4	4	5	4	3.4	4	12.2	4	21.9	4	4.4	4	19.5
Q6P6C2	ALKBH5	RNA demethylase ALKBH5	RNA demethylase ALKBH5 OS=Homo sapiens GN=ALKBH5 PE=1 SV=2 - [ALKB5_HUMAN]	394	44.2	1.003	0.832	0.87	0.779	0.905	5	5	6	6	3.3	6	4.2	6	4.4	6	4.5	6	6.5
M0QZI0	ALKBH7		Alpha-ketoglutarate-dependent dioxygenase alkB homolog 7, mitochondrial OS=Homo sapiens GN=ALKBH7 PE=4 SV=1 - [M0QZI0_HUMAN]	160	17.6	0.785	1.015	0.893	0.606	1.051	1	1	1	1	NaN	1	NaN	1	NaN	1	NaN	1	NaN
A6NMY3	ALMS1		Alstrom syndrome protein 1 OS=Homo sapiens GN=ALMS1 PE=2 SV=1 - [A6NMY3_HUMAN]	2561	279	0.8	0.723	0.531	0.447	0.868	2	2	3	3	1.8	3	2.9	3	5.3	3	96.6	3	10.7
P20292	ALOX5AP	Arachidonate 5-lipoxygenase-activating protein	Arachidonate 5-lipoxygenase-activating protein OS=Homo sapiens GN=ALOX5AP PE=1 SV=2 - [AL5AP_HUMAN]	161	18.1	1.228	1.579	1.632	2.101	1.962	1	1	1	1	NaN	1	NaN	1	NaN	1	NaN	1	NaN
Q86V81	ALYREF	THO complex subunit 4	THO complex subunit 4 OS=Homo sapiens GN=ALYREF PE=1 SV=3 - [THOC4_HUMAN]	257	26.9	1.011	1.033	0.907	0.78	0.97	6	6	24	23	7.4	23	8.4	23	17.1	23	12.9	23	13.9
Q9C0C7	AMBRA1	Activating molecule in BECN1-regulated autophagy protein 1	Activating molecule in BECN1-regulated autophagy protein 1 OS=Homo sapiens GN=AMBRA1 PE=1 SV=2 - [AMRA1_HUMAN]	1298	142.4	0.952	1.09	0.866	0.85	0.936	3	3	3	3	0.5	3	26.2	3	27	3	24.6	3	13
Q5VXN5	AMD1		S-adenosylmethionine decarboxylase proenzyme OS=Homo sapiens GN=AMD1 PE=2 SV=1 - [Q5VXN5_HUMAN]	265	30.5	0.656	0.542	0.382	0.608	0.599	1	1	1	1	NaN	1	NaN	1	NaN	1	NaN	1	NaN
H3BTE3	AMDHD2		Putative N-acetylglucosamine-6-phosphate deacetylase (Fragment) OS=Homo sapiens GN=AMDHD2 PE=2 SV=1 - [H3BTE3_HUMAN]	269	28.5	1.203	0.916	1.009	1.17	0.791	1	1	1	1	NaN	1	NaN	1	NaN	1	NaN	1	NaN
H3BRK9	AMFR		E3 ubiquitin-protein ligase AMFR (Fragment) OS=Homo sapiens GN=AMFR PE=2 SV=1 - [H3BRK9_HUMAN]	288	32.7	0.984	1.408	1.122	1.044	1.194	1	1	1	1	NaN	1	NaN	1	NaN	1	NaN	1	NaN
Q8IY63	AMOTL1	Angiomotin-like protein 1	Angiomotin-like protein 1 OS=Homo sapiens GN=AMOTL1 PE=1 SV=1 - [AMOL1_HUMAN]	956	106.5	0.979	1.039	0.89	0.99	1.324	1	2	2	1	NaN	1	NaN	1	NaN	1	NaN	1	NaN
Q01433	AMPD2	AMP deaminase 2	AMP deaminase 2 OS=Homo sapiens GN=AMPD2 PE=1 SV=2 - [AMPD2_HUMAN]	879	100.6	0.978	0.781	0.747	0.752	0.697	17	17	25	25	3.3	25	8	25	14.5	25	6.8	25	12.6
Q01432	AMPD3	AMP deaminase 3	AMP deaminase 3 OS=Homo sapiens GN=AMPD3 PE=1 SV=1 - [AMPD3_HUMAN]	767	88.8	0.436	0.916	1.067	1.494	1.66	1	1	1	1	NaN	1	NaN	1	NaN	1	NaN	1	NaN
Q9H1A4	ANAPC1	Anaphase-promoting complex subunit 1	Anaphase-promoting complex subunit 1 OS=Homo sapiens GN=ANAPC1 PE=1 SV=1 - [APC1_HUMAN]	1944	216.4	0.921	1.017	0.938	0.939	1.103	8	8	11	11	8	11	4.4	11	5.5	11	5.6	11	6.3
Q9UM13	ANAPC10	Anaphase-promoting complex subunit 10	Anaphase-promoting complex subunit 10 OS=Homo sapiens GN=ANAPC10 PE=1 SV=1 - [APC10_HUMAN]	185	21.2	1.038	1.091	1.081	1.05	1.13	2	2	2	2	4.8	2	18.9	2	7.5	2	11	2	6.7
Q9UJX6	ANAPC2	Anaphase-promoting complex subunit 2	Anaphase-promoting complex subunit 2 OS=Homo sapiens GN=ANAPC2 PE=1 SV=1 - [ANC2_HUMAN]	822	93.8	1.036	1.012	0.982	0.922	1.129	5	5	5	5	21.4	5	10.5	5	8.9	5	10.8	5	18.9
Q9UJX5	ANAPC4	Anaphase-promoting complex subunit 4	Anaphase-promoting complex subunit 4 OS=Homo sapiens GN=ANAPC4 PE=1 SV=2 - [APC4_HUMAN]	808	92.1	0.936	0.976	0.843	0.886	1.043	2	2	2	2	16.2	2	9.6	2	7.6	2	3.8	2	5.8
F5GY68	ANAPC5		Anaphase-promoting complex subunit 5 (Fragment) OS=Homo sapiens GN=ANAPC5 PE=2 SV=1 - [F5GY68_HUMAN]	217	24.7	0.974	1.055	0.953	0.952	1.113	3	3	3	3	2.2	3	3.9	3	12.1	3	5.7	3	14
Q9UJX3	ANAPC7	Anaphase-promoting complex subunit 7	Anaphase-promoting complex subunit 7 OS=Homo sapiens GN=ANAPC7 PE=1 SV=4 - [APC7_HUMAN]	599	66.8	0.935	1.058	1.041	1.01	1.07	16	16	18	18	6.6	18	11.9	18	10.5	18	9.7	18	9.1
B7Z5T0	ANGEL2		Protein angel homolog 2 OS=Homo sapiens GN=ANGEL2 PE=2 SV=1 - [B7Z5T0_HUMAN]	212	24.1	1.043	1.122	1.527	1.597	1.162	1	1	1	1	NaN	1	NaN	1	NaN	1	NaN	1	NaN
Q9P2R3	ANKFY1	Ankyrin repeat and FYVE domain-containing protein 1	Ankyrin repeat and FYVE domain-containing protein 1 OS=Homo sapiens GN=ANKFY1 PE=1 SV=2 - [ANFY1_HUMAN]	1169	128.3	0.951	0.951	1.024	1.138	1.057	16	17	23	21	10.5	21	10.3	21	12.6	21	19.5	21	8.2
Q8IWZ3	ANKHD1	Ankyrin repeat and KH domain-containing protein 1	Ankyrin repeat and KH domain-containing protein 1 OS=Homo sapiens GN=ANKHD1 PE=1 SV=1 - [ANKH1_HUMAN]	2542	269.3	0.92	1.084	0.975	0.716	1.055	9	22	29	10	6.1	10	13	10	19.5	10	10.6	10	13.8
D6RHC4	ANKHD1		Ankyrin repeat and KH domain-containing protein 1 (Fragment) OS=Homo sapiens GN=ANKHD1 PE=2 SV=1 - [D6RHC4_HUMAN]	368	37.5	1.079	1.224	0.743	0.761	0.925	1	6	10	1	NaN	1	NaN	1	NaN	1	NaN	1	NaN
F5H2H5	ANKLE2		Ankyrin repeat and LEM domain-containing protein 2 OS=Homo sapiens GN=ANKLE2 PE=2 SV=1 - [F5H2H5_HUMAN]	876	97.7	0.9	0.859	0.804	0.672	0.862	5	5	5	5	6.6	5	7.6	5	4.6	5	4.6	5	11.6
Q8IV38	ANKMY2	Ankyrin repeat and MYND domain-containing protein 2	Ankyrin repeat and MYND domain-containing protein 2 OS=Homo sapiens GN=ANKMY2 PE=1 SV=1 - [ANKY2_HUMAN]	441	49.3	1.019	0.931	0.837	0.858	0.994	8	8	11	11	9.3	11	8.6	11	5.5	11	13.3	11	4.6
Q8IZ07	ANKRD13A	Ankyrin repeat domain-containing protein 13A	Ankyrin repeat domain-containing protein 13A OS=Homo sapiens GN=ANKRD13A PE=1 SV=3 - [AN13A_HUMAN]	590	67.6	1.023	1.001	1.139	1.247	1.145	8	8	9	9	18.8	9	4.1	9	19.5	9	18.7	9	15.1
Q8N6S4	ANKRD13C	Ankyrin repeat domain-containing protein 13C	Ankyrin repeat domain-containing protein 13C OS=Homo sapiens GN=ANKRD13C PE=2 SV=2 - [AN13C_HUMAN]	541	60.8	1.045	1.15	1.143	1.111	1.365	1	1	1	1	NaN	1	NaN	1	NaN	1	NaN	1	NaN
H0YM23	ANKRD17		Ankyrin repeat domain-containing protein 17 (Fragment) OS=Homo sapiens GN=ANKRD17 PE=4 SV=1 - [H0YM23_HUMAN]	2487	263.2	0.86	1.031	0.903	0.824	1.014	12	23	31	15	9.1	15	9.1	15	17.9	15	17.6	15	15.4
Q4UJ75	ANKRD20A4	Ankyrin repeat domain-containing protein 20A4	Ankyrin repeat domain-containing protein 20A4 OS=Homo sapiens GN=ANKRD20A4 PE=2 SV=1 - [A20A4_HUMAN]	823	94.1	1.033	0.965	0.867	0.548	0.631	1	1	1	1	NaN	1	NaN	1	NaN	1	NaN	1	NaN
Q96NW4	ANKRD27	Ankyrin repeat domain-containing protein 27	Ankyrin repeat domain-containing protein 27 OS=Homo sapiens GN=ANKRD27 PE=1 SV=2 - [ANR27_HUMAN]	1050	116.9	0.893	1.033	0.951	0.839	1.05	3	3	3	3	2.5	3	7	3	8.1	3	6.7	3	7.7
O15084	ANKRD28	Serine/threonine-protein phosphatase 6 regulatory ankyrin repeat subunit A	Serine/threonine-protein phosphatase 6 regulatory ankyrin repeat subunit A OS=Homo sapiens GN=ANKRD28 PE=1 SV=5 - [ANR28_HUMAN]	1053	112.9	0.979	0.938	1.054	1.037	1.011	7	8	11	9	7.1	9	6.7	9	8	9	11.3	9	4.2
Q8N7Z5	ANKRD31	Putative ankyrin repeat domain-containing protein 31	Putative ankyrin repeat domain-containing protein 31 OS=Homo sapiens GN=ANKRD31 PE=5 SV=2 - [ANR31_HUMAN]	1873	210.7	1.098	1.005	1.007	1.053	0.964	1	1	1	1	NaN	1	NaN	1	NaN	1	NaN	1	NaN
Q53RE8	ANKRD39	Ankyrin repeat domain-containing protein 39	Ankyrin repeat domain-containing protein 39 OS=Homo sapiens GN=ANKRD39 PE=1 SV=1 - [ANR39_HUMAN]	183	19.6	1.045	1.034	1.197	1.19	1.138	2	2	2	2	7.8	2	5.3	2	69.2	2	61.1	2	1.9
J3KP26	ANKRD46		Ankyrin repeat domain-containing protein 46 (Fragment) OS=Homo sapiens GN=ANKRD46 PE=4 SV=1 - [J3KP26_HUMAN]	195	21.7	0.775	1.303	0.968	0.97	1.344	1	1	1	1	NaN	1	NaN	1	NaN	1	NaN	1	NaN
Q9ULJ7	ANKRD50	Ankyrin repeat domain-containing protein 50	Ankyrin repeat domain-containing protein 50 OS=Homo sapiens GN=ANKRD50 PE=1 SV=4 - [ANR50_HUMAN]	1429	155.8	0.795	1.299	1.26	1.156	1.25	1	1	1	1	NaN	1	NaN	1	NaN	1	NaN	1	NaN
Q8NB46	ANKRD52	Serine/threonine-protein phosphatase 6 regulatory ankyrin repeat subunit C	Serine/threonine-protein phosphatase 6 regulatory ankyrin repeat subunit C OS=Homo sapiens GN=ANKRD52 PE=1 SV=3 - [ANR52_HUMAN]	1076	115	0.963	0.79	0.749	0.867	0.551	1	2	3	1	NaN	1	NaN	1	NaN	1	NaN	1	NaN
Q92625	ANKS1A	Ankyrin repeat and SAM domain-containing protein 1A	Ankyrin repeat and SAM domain-containing protein 1A OS=Homo sapiens GN=ANKS1A PE=1 SV=4 - [ANS1A_HUMAN]	1134	123	0.988	1.166	1.226	1.316	1.194	11	11	18	18	14.7	18	15.2	18	9.5	18	21.6	18	20.9
Q9H8Y5	ANKZF1	Ankyrin repeat and zinc finger domain-containing protein 1	Ankyrin repeat and zinc finger domain-containing protein 1 OS=Homo sapiens GN=ANKZF1 PE=1 SV=1 - [ANKZ1_HUMAN]	726	80.9	0.99	0.958	1.076	0.911	0.785	14	14	15	15	6.1	15	14.1	15	10.1	15	16.9	15	12.4
Q9NQW6	ANLN	Actin-binding protein anillin	Actin-binding protein anillin OS=Homo sapiens GN=ANLN PE=1 SV=2 - [ANLN_HUMAN]	1124	124.1	1.142	1.823	2.217	2.407	1.415	18	18	18	18	9.7	18	18.1	18	15.1	18	19.6	18	13.4
Q9NW15	ANO10	Anoctamin-10	Anoctamin-10 OS=Homo sapiens GN=ANO10 PE=1 SV=2 - [ANO10_HUMAN]	660	76.3	1.089	1.105	1.362	1.437	1.319	1	2	2	1	NaN	1	NaN	1	NaN	1	NaN	1	NaN
Q4KMQ2	ANO6	Anoctamin-6	Anoctamin-6 OS=Homo sapiens GN=ANO6 PE=1 SV=2 - [ANO6_HUMAN]	910	106.1	0.947	0.989	1.228	1.386	1.172	7	7	7	7	2.4	7	12.6	7	16	7	5.5	7	11.3
H0YN26	ANP32A		Acidic leucine-rich nuclear phosphoprotein 32 family member A OS=Homo sapiens GN=ANP32A PE=2 SV=1 - [H0YN26_HUMAN]	177	20	1.114	0.917	0.902	0.878	0.93	4	10	48	10	8.1	10	10.1	10	5.9	10	9.2	10	8.8
Q92688	ANP32B	Acidic leucine-rich nuclear phosphoprotein 32 family member B	Acidic leucine-rich nuclear phosphoprotein 32 family member B OS=Homo sapiens GN=ANP32B PE=1 SV=1 - [AN32B_HUMAN]	251	28.8	1.034	0.967	0.862	0.838	0.905	3	9	58	20	4.9	20	6.8	20	5.9	20	7.7	20	7.4
Q9BTT0	ANP32E	Acidic leucine-rich nuclear phosphoprotein 32 family member E	Acidic leucine-rich nuclear phosphoprotein 32 family member E OS=Homo sapiens GN=ANP32E PE=1 SV=1 - [AN32E_HUMAN]	268	30.7	1.052	0.988	0.965	0.864	0.983	5	5	17	17	10.1	17	10.3	17	10.9	17	12	17	7.2
J3KPY9	ANTXR2		Anthrax toxin receptor 2 OS=Homo sapiens GN=ANTXR2 PE=4 SV=1 - [J3KPY9_HUMAN]	411	44.8	0.903	1.346	1.361	2.25	1.043	2	2	2	2	5.6	2	39.6	2	22.7	2	6.8	2	33
P04083	ANXA1	Annexin A1	Annexin A1 OS=Homo sapiens GN=ANXA1 PE=1 SV=2 - [ANXA1_HUMAN]	346	38.7	1.045	1.089	1.148	1.225	1.061	22	22	57	57	7.9	57	6.9	57	8.5	57	11.9	57	9
B4DVE7	ANXA11	Annexin	Annexin OS=Homo sapiens GN=ANXA11 PE=2 SV=1 - [B4DVE7_HUMAN]	472	51.2	0.994	0.908	1.05	1.084	0.914	13	13	32	32	7.4	32	8.2	32	7.4	32	11.1	32	10.6
P07355	ANXA2	Annexin A2	Annexin A2 OS=Homo sapiens GN=ANXA2 PE=1 SV=2 - [ANXA2_HUMAN]	339	38.6	0.99	1.04	1.167	1.174	1.02	23	23	53	53	7	53	9.8	53	12.2	53	11.5	53	16.2
P12429	ANXA3	Annexin A3	Annexin A3 OS=Homo sapiens GN=ANXA3 PE=1 SV=3 - [ANXA3_HUMAN]	323	36.4	1.06	0.862	0.897	0.983	0.602	13	13	18	18	7.5	18	6.7	18	7.5	18	8.4	18	8.9
P09525	ANXA4	Annexin A4	Annexin A4 OS=Homo sapiens GN=ANXA4 PE=1 SV=4 - [ANXA4_HUMAN]	319	35.9	1.042	1.019	1.515	1.887	1.1	11	12	20	18	11.8	18	11.2	18	10.1	18	18.8	18	16.5
P08758	ANXA5	Annexin A5	Annexin A5 OS=Homo sapiens GN=ANXA5 PE=1 SV=2 - [ANXA5_HUMAN]	320	35.9	1.064	1.126	1.28	1.508	1.3	11	12	32	30	6	30	12.3	30	25.4	30	16.7	30	13.6
P08133	ANXA6	Annexin A6	Annexin A6 OS=Homo sapiens GN=ANXA6 PE=1 SV=3 - [ANXA6_HUMAN]	673	75.8	1.01	1.107	1.469	1.474	1.159	2	39	149	9	5.4	9	3.4	9	11.5	9	6.3	9	6.9
A6NN80	ANXA6	Annexin	Annexin OS=Homo sapiens GN=ANXA6 PE=2 SV=3 - [A6NN80_HUMAN]	667	75.2	1.018	1.013	1.541	1.694	1.161	2	39	143	3	3.7	3	1.8	3	1.7	3	0.6	3	2.2
B4DT77	ANXA7	Annexin	Annexin OS=Homo sapiens GN=ANXA7 PE=2 SV=1 - [B4DT77_HUMAN]	336	37.8	1.022	1.055	1.12	1.288	1.047	12	12	24	24	6.5	24	7.3	24	15.8	24	15.2	24	8.5
Q63HQ0	AP1AR	AP-1 complex-associated regulatory protein	AP-1 complex-associated regulatory protein OS=Homo sapiens GN=AP1AR PE=1 SV=1 - [AP1AR_HUMAN]	302	34.3	0.957	0.841	0.729	0.704	0.836	1	1	1	1	NaN	1	NaN	1	NaN	1	NaN	1	NaN
Q10567	AP1B1	AP-1 complex subunit beta-1	AP-1 complex subunit beta-1 OS=Homo sapiens GN=AP1B1 PE=1 SV=2 - [AP1B1_HUMAN]	949	104.6	1.014	1.013	1.112	1.216	1.087	15	30	53	26	8.7	26	10.4	26	14.7	26	12	26	12.2
O43747	AP1G1	AP-1 complex subunit gamma-1	AP-1 complex subunit gamma-1 OS=Homo sapiens GN=AP1G1 PE=1 SV=5 - [AP1G1_HUMAN]	822	91.3	1.074	1.002	1.028	1.126	0.998	9	9	13	13	4.9	13	5.1	13	13.7	13	14.5	13	10.8
O75843	AP1G2	AP-1 complex subunit gamma-like 2	AP-1 complex subunit gamma-like 2 OS=Homo sapiens GN=AP1G2 PE=1 SV=1 - [AP1G2_HUMAN]	785	87.1	1.037	0.975	1.163	1.542	1.19	8	8	8	8	6.2	8	10.4	8	24.3	8	16.2	8	14.6
Q9BXS5	AP1M1	AP-1 complex subunit mu-1	AP-1 complex subunit mu-1 OS=Homo sapiens GN=AP1M1 PE=1 SV=3 - [AP1M1_HUMAN]	423	48.6	1.014	1.005	1.05	1.114	1.023	12	12	28	25	6.4	25	7.5	25	7.2	25	8.1	25	13.4
P61966	AP1S1	AP-1 complex subunit sigma-1A	AP-1 complex subunit sigma-1A OS=Homo sapiens GN=AP1S1 PE=1 SV=1 - [AP1S1_HUMAN]	158	18.7	1.018	0.964	0.987	1.018	0.887	3	3	7	7	8.7	7	3.6	7	8.8	7	3.3	7	5.9
P56377	AP1S2	AP-1 complex subunit sigma-2	AP-1 complex subunit sigma-2 OS=Homo sapiens GN=AP1S2 PE=1 SV=1 - [AP1S2_HUMAN]	157	18.6	0.983	0.994	1.091	1.24	1.16	3	3	3	3	0.4	3	4.8	3	10.8	3	9.8	3	8.6
O95782	AP2A1	AP-2 complex subunit alpha-1	AP-2 complex subunit alpha-1 OS=Homo sapiens GN=AP2A1 PE=1 SV=3 - [AP2A1_HUMAN]	977	107.5	1.014	1.038	1.207	1.219	1.11	19	26	47	38	5.7	38	6.7	38	8.6	38	9.6	38	6.9
O94973	AP2A2	AP-2 complex subunit alpha-2	AP-2 complex subunit alpha-2 OS=Homo sapiens GN=AP2A2 PE=1 SV=2 - [AP2A2_HUMAN]	939	103.9	1.002	1.002	1.095	1.251	1.127	11	18	29	21	6	21	9	21	8.4	21	6.9	21	8.4
P63010	AP2B1	AP-2 complex subunit beta	AP-2 complex subunit beta OS=Homo sapiens GN=AP2B1 PE=1 SV=1 - [AP2B1_HUMAN]	937	104.5	1.013	1.017	1.133	1.093	1.058	15	30	60	31	8.3	31	10.6	31	11.8	31	9.7	31	13
Q96CW1	AP2M1	AP-2 complex subunit mu	AP-2 complex subunit mu OS=Homo sapiens GN=AP2M1 PE=1 SV=2 - [AP2M1_HUMAN]	435	49.6	1.032	1.055	1.066	1.145	1.05	11	11	16	16	7.6	16	8.8	16	8.1	16	14.5	16	13
P53680	AP2S1	AP-2 complex subunit sigma	AP-2 complex subunit sigma OS=Homo sapiens GN=AP2S1 PE=1 SV=2 - [AP2S1_HUMAN]	142	17	1.02	1.053	1.079	1.145	1.101	4	4	7	7	12.4	7	3.6	7	7.5	7	5.3	7	11.3
O00203	AP3B1	AP-3 complex subunit beta-1	AP-3 complex subunit beta-1 OS=Homo sapiens GN=AP3B1 PE=1 SV=3 - [AP3B1_HUMAN]	1094	121.2	1.023	0.886	0.981	1.018	0.968	22	27	35	29	8.4	29	8.9	29	16.9	29	11.5	29	9.3
Q13367	AP3B2	AP-3 complex subunit beta-2	AP-3 complex subunit beta-2 OS=Homo sapiens GN=AP3B2 PE=1 SV=2 - [AP3B2_HUMAN]	1082	119	0.956	0.994	0.898	0.837	0.827	1	6	7	1	NaN	1	NaN	1	NaN	1	NaN	1	NaN
O14617	AP3D1	AP-3 complex subunit delta-1	AP-3 complex subunit delta-1 OS=Homo sapiens GN=AP3D1 PE=1 SV=1 - [AP3D1_HUMAN]	1153	130.1	0.964	0.947	0.997	1.062	0.994	23	23	46	46	9.5	46	7.5	46	12.1	46	9.1	46	10.9
Q9Y2T2	AP3M1	AP-3 complex subunit mu-1	AP-3 complex subunit mu-1 OS=Homo sapiens GN=AP3M1 PE=1 SV=1 - [AP3M1_HUMAN]	418	46.9	0.995	0.96	1.045	1.119	1.028	11	11	16	16	9.7	16	10	16	10.8	16	8.1	16	10.9
Q92572	AP3S1	AP-3 complex subunit sigma-1	AP-3 complex subunit sigma-1 OS=Homo sapiens GN=AP3S1 PE=1 SV=1 - [AP3S1_HUMAN]	193	21.7	0.989	1.001	0.985	1	1.057	6	6	8	8	6.5	8	10.6	8	12.6	8	14.1	8	15.6
Q9UPM8	AP4E1	AP-4 complex subunit epsilon-1	AP-4 complex subunit epsilon-1 OS=Homo sapiens GN=AP4E1 PE=1 SV=2 - [AP4E1_HUMAN]	1137	127.2	1.044	0.915	0.801	0.909	1.003	1	1	1	1	NaN	1	NaN	1	NaN	1	NaN	1	NaN
H7C0A0	AP4M1		AP-4 complex subunit mu-1 (Fragment) OS=Homo sapiens GN=AP4M1 PE=4 SV=1 - [H7C0A0_HUMAN]	138	15.7	1.039	1.298	1.2	1.353	1.311	1	1	1	1	NaN	1	NaN	1	NaN	1	NaN	1	NaN
Q9NUS5	AP5S1	AP-5 complex subunit sigma-1	AP-5 complex subunit sigma-1 OS=Homo sapiens GN=AP5S1 PE=1 SV=1 - [AP5S1_HUMAN]	200	22.5	0.93	0.854	0.961	1.116	1.138	1	2	2	1	NaN	1	NaN	1	NaN	1	NaN	1	NaN
O43299	AP5Z1	AP-5 complex subunit zeta-1	AP-5 complex subunit zeta-1 OS=Homo sapiens GN=AP5Z1 PE=1 SV=2 - [AP5Z1_HUMAN]	807	88.5	0.864	0.704	0.715	0.785	0.85	1	1	1	1	NaN	1	NaN	1	NaN	1	NaN	1	NaN
C9JLV4	APAF1		Apoptotic protease-activating factor 1 OS=Homo sapiens GN=APAF1 PE=2 SV=1 - [C9JLV4_HUMAN]	1163	132.4	0.982	1.31	1.559	1.842	1.541	4	5	5	4	2.3	4	10.6	4	10.5	4	5.6	4	24.6
Q7Z5R6	APBB1IP	Amyloid beta A4 precursor protein-binding family B member 1-interacting protein	Amyloid beta A4 precursor protein-binding family B member 1-interacting protein OS=Homo sapiens GN=APBB1IP PE=1 SV=1 - [AB1IP_HUMAN]	666	73.1	0.972	1.289	1.193	1.041	1.219	16	17	32	27	12.2	27	6.5	27	16.4	26	17.1	27	12.2
E9PFT7	APC		Adenomatous polyposis coli protein (Fragment) OS=Homo sapiens GN=APC PE=2 SV=1 - [E9PFT7_HUMAN]	1305	145.7	1.249	1.555	1.305	1.804	1.382	1	2	2	1	NaN	1	NaN	1	NaN	1	NaN	1	NaN
O95996	APC2	Adenomatous polyposis coli protein 2	Adenomatous polyposis coli protein 2 OS=Homo sapiens GN=APC2 PE=1 SV=1 - [APC2_HUMAN]	2303	243.8	0.916	1.009	1.019	0.929	0.875	1	2	2	1	NaN	1	NaN	1	NaN	1	NaN	1	NaN
P13798	APEH	Acylamino-acid-releasing enzyme	Acylamino-acid-releasing enzyme OS=Homo sapiens GN=APEH PE=1 SV=4 - [ACPH_HUMAN]	732	81.2	1.032	0.948	1.108	1.24	0.965	17	17	37	37	5.9	37	8.4	37	7.9	37	6.7	37	12.4
P27695	APEX1	DNA-(apurinic or apyrimidinic site) lyase;DNA-(apurinic or apyrimidinic site) lyase, mitochondrial	DNA-(apurinic or apyrimidinic site) lyase OS=Homo sapiens GN=APEX1 PE=1 SV=2 - [APEX1_HUMAN]	318	35.5	1.01	1.07	0.973	0.967	1.017	17	17	37	37	6.5	37	7	37	14.7	37	9.2	37	13.7
G3V1C3	API5		Apoptosis inhibitor 5 OS=Homo sapiens GN=API5 PE=2 SV=1 - [G3V1C3_HUMAN]	510	57.5	1.008	0.954	0.919	0.84	0.824	17	17	41	41	7.4	41	9.3	41	16.7	41	11.1	41	13.8
Q96GX9	APIP	Methylthioribulose-1-phosphate dehydratase	Methylthioribulose-1-phosphate dehydratase OS=Homo sapiens GN=APIP PE=1 SV=1 - [MTNB_HUMAN]	242	27.1	1.029	0.915	1.002	1.021	0.973	9	9	17	17	4.3	17	7	17	12.9	17	13.6	17	8
Q8N2Z9	APITD1	Centromere protein S	Centromere protein S OS=Homo sapiens GN=APITD1 PE=1 SV=1 - [CENPS_HUMAN]	138	15.9	0.925	0.779	0.775	0.682	0.855	3	3	3	3	4.5	3	4.8	3	9.2	3	11.3	3	0.7
Q9HDC9	APMAP	Adipocyte plasma membrane-associated protein	Adipocyte plasma membrane-associated protein OS=Homo sapiens GN=APMAP PE=1 SV=2 - [APMAP_HUMAN]	416	46.5	1.032	0.999	1.136	1.267	1.029	13	13	34	33	8.3	33	8.9	33	9.3	33	10.7	33	11.7
F8W696	APOA1		Truncated apolipoprotein A-I OS=Homo sapiens GN=APOA1 PE=2 SV=1 - [F8W696_HUMAN]	245	27.9	0.651	0.906	0.954	3.86	0.514	1	2	2	1	NaN	1	NaN	1	NaN	1	NaN	1	NaN
Q8NCW5	APOA1BP	NAD(P)H-hydrate epimerase	NAD(P)H-hydrate epimerase OS=Homo sapiens GN=APOA1BP PE=1 SV=2 - [NNRE_HUMAN]	288	31.7	1.015	1.005	1.132	1.254	1.054	10	10	23	23	6	23	8	23	9.8	23	9.5	23	5.1
P04114	APOB	Apolipoprotein B-100;Apolipoprotein B-48	Apolipoprotein B-100 OS=Homo sapiens GN=APOB PE=1 SV=2 - [APOB_HUMAN]	4563	515.3	1.127	1.055	0.996	1.12	1.173	1	1	1	1	NaN	1	NaN	1	NaN	1	NaN	1	NaN
Q9UH17	APOBEC3B	DNA dC->dU-editing enzyme APOBEC-3B	DNA dC->dU-editing enzyme APOBEC-3B OS=Homo sapiens GN=APOBEC3B PE=1 SV=1 - [ABC3B_HUMAN]	382	45.9	0.852	1.052	0.658	0.71	0.721	2	3	4	2	32.7	2	11.2	2	18.6	2	6.3	2	25.1
Q9NRW3	APOBEC3C	DNA dC->dU-editing enzyme APOBEC-3C	DNA dC->dU-editing enzyme APOBEC-3C OS=Homo sapiens GN=APOBEC3C PE=1 SV=2 - [ABC3C_HUMAN]	190	22.8	0.992	0.451	0.06	0.018	1.066	2	2	5	5	5	5	7.5	5	44	5	114.8	5	8.8
Q9BQE5	APOL2	Apolipoprotein L2	Apolipoprotein L2 OS=Homo sapiens GN=APOL2 PE=1 SV=1 - [APOL2_HUMAN]	337	37.1	0.96	1.194	1.048	0.975	0.953	3	4	5	3	5.7	3	9.5	3	2.4	3	1.5	3	7.1
O95236	APOL3	Apolipoprotein L3	Apolipoprotein L3 OS=Homo sapiens GN=APOL3 PE=2 SV=3 - [APOL3_HUMAN]	402	44.3	0.935	1.435	1.132	1.252	1	4	4	5	5	3	5	3.1	5	4.5	5	9	5	4.3
H7C1U8	APOO		Apolipoprotein O (Fragment) OS=Homo sapiens GN=APOO PE=2 SV=1 - [H7C1U8_HUMAN]	178	20.1	1.05	1.02	0.989	1.1	1.004	4	4	10	10	9.2	10	9.7	10	14.3	10	8.7	10	10.5
Q6UXV4	APOOL	Apolipoprotein O-like	Apolipoprotein O-like OS=Homo sapiens GN=APOOL PE=1 SV=1 - [APOOL_HUMAN]	268	29.1	1.014	0.974	1.039	1.111	0.885	6	6	6	5	5	6	2.9	6	5.2	6	8.5	6	10.3
K7EN61	APPBP2		Amyloid protein-binding protein 2 OS=Homo sapiens GN=APPBP2 PE=4 SV=1 - [K7EN61_HUMAN]	95	11.2	0.994	1.06	0.913	0.732	1.457	1	1	1	1	NaN	1	NaN	1	NaN	1	NaN	1	NaN
Q9UKG1	APPL1	DCC-interacting protein 13-alpha	DCC-interacting protein 13-alpha OS=Homo sapiens GN=APPL1 PE=1 SV=1 - [DP13A_HUMAN]	709	79.6	1.012	0.97	0.996	0.987	0.951	17	17	26	26	8.3	26	8.9	26	11.5	26	18	26	14.9
P07741	APRT	Adenine phosphoribosyltransferase	Adenine phosphoribosyltransferase OS=Homo sapiens GN=APRT PE=1 SV=2 - [APT_HUMAN]	180	19.6	1.049	0.912	0.978	1.013	0.833	7	7	20	20	6.6	20	10.4	20	6.8	20	9.3	20	11.9
Q7Z2E3	APTX	Aprataxin	Aprataxin OS=Homo sapiens GN=APTX PE=1 SV=2 - [APTX_HUMAN]	356	40.7	0.85	1.104	0.97	1.044	1.074	3	3	3	3	6.4	3	14.7	3	2.9	3	0.1	3	14.8
O60306	AQR	Intron-binding protein aquarius	Intron-binding protein aquarius OS=Homo sapiens GN=AQR PE=1 SV=4 - [AQR_HUMAN]	1485	171.2	1.005	0.926	0.898	0.851	0.902	25	26	40	39	7.9	39	8.7	39	12.5	39	12.5	39	7
P10398	ARAF	Serine/threonine-protein kinase A-Raf	Serine/threonine-protein kinase A-Raf OS=Homo sapiens GN=ARAF PE=1 SV=2 - [ARAF_HUMAN]	606	67.5	0.983	1.013	0.929	1.001	1.023	6	9	10	6	9.7	6	10.3	6	12	6	15.1	6	9.8
Q96P48	ARAP1	Arf-GAP with Rho-GAP domain, ANK repeat and PH domain-containing protein 1	Arf-GAP with Rho-GAP domain, ANK repeat and PH domain-containing protein 1 OS=Homo sapiens GN=ARAP1 PE=1 SV=3 - [ARAP1_HUMAN]	1450	162.1	0.994	0.979	1.129	1.273	1.101	15	15	19	18	11.6	19	13.2	18	5.8	19	13.1	18	12.5
P48444	ARCN1	Coatomer subunit delta	Coatomer subunit delta OS=Homo sapiens GN=ARCN1 PE=1 SV=1 - [COPD_HUMAN]	511	57.2	0.988	0.997	1.125	1.178	1.034	22	22	51	51	5.9	51	8.5	51	10.6	51	7.5	51	8.5
P61204	ARF3	ADP-ribosylation factor 3	ADP-ribosylation factor 3 OS=Homo sapiens GN=ARF3 PE=1 SV=2 - [ARF3_HUMAN]	181	20.6	1.053	1.048	1.06	1.172	1.007	3	8	34	12	5.1	12	5.1	12	11	12	9.2	12	8.9
P18085	ARF4	ADP-ribosylation factor 4	ADP-ribosylation factor 4 OS=Homo sapiens GN=ARF4 PE=1 SV=3 - [ARF4_HUMAN]	180	20.5	1.016	1.001	1.097	1.078	0.892	5	9	36	19	8.3	19	7.9	19	11.8	19	5.2	19	5.9
P84085	ARF5	ADP-ribosylation factor 5	ADP-ribosylation factor 5 OS=Homo sapiens GN=ARF5 PE=1 SV=2 - [ARF5_HUMAN]	180	20.5	1.03	1.067	1.248	1.365	1.159	4	9	36	13	6.7	14	8.3	14	11.6	14	11.1	14	9.5
P62330	ARF6	ADP-ribosylation factor 6	ADP-ribosylation factor 6 OS=Homo sapiens GN=ARF6 PE=1 SV=2 - [ARF6_HUMAN]	175	20.1	1.065	0.957	0.981	1.048	1.045	4	4	14	12	4.2	12	1.8	12	8.9	12	8.1	12	3.5
Q8N6T3	ARFGAP1	ADP-ribosylation factor GTPase-activating protein 1	ADP-ribosylation factor GTPase-activating protein 1 OS=Homo sapiens GN=ARFGAP1 PE=1 SV=2 - [ARFG1_HUMAN]	406	44.6	0.955	0.906	0.835	0.837	0.865	14	14	23	23	8.5	23	8.2	23	10.3	23	12.6	23	11.9
Q8N6H7	ARFGAP2	ADP-ribosylation factor GTPase-activating protein 2	ADP-ribosylation factor GTPase-activating protein 2 OS=Homo sapiens GN=ARFGAP2 PE=1 SV=1 - [ARFG2_HUMAN]	521	56.7	1.043	1.095	1.054	1.033	1.139	11	11	17	14	10.8	14	11.1	14	15.9	14	13.8	14	8.7
C9JZR4	ARFGAP3		ADP-ribosylation factor GTPase-activating protein 3 OS=Homo sapiens GN=ARFGAP3 PE=2 SV=2 - [C9JZR4_HUMAN]	444	48.9	0.985	0.855	0.824	0.769	0.935	11	11	14	14	7.6	14	10.2	14	13.6	14	15.3	14	10.5
Q9Y6D6	ARFGEF1	Brefeldin A-inhibited guanine nucleotide-exchange protein 1	Brefeldin A-inhibited guanine nucleotide-exchange protein 1 OS=Homo sapiens GN=ARFGEF1 PE=1 SV=2 - [BIG1_HUMAN]	1849	208.6	0.946	1.05	1.147	1.214	1.122	7	17	21	8	6.8	8	3.7	8	6.6	8	8.1	8	6
Q9Y6D5	ARFGEF2	Brefeldin A-inhibited guanine nucleotide-exchange protein 2	Brefeldin A-inhibited guanine nucleotide-exchange protein 2 OS=Homo sapiens GN=ARFGEF2 PE=1 SV=3 - [BIG2_HUMAN]	1785	201.9	1.003	0.939	1.005	1.111	0.952	12	22	26	13	10.7	13	7.6	13	8.3	13	8.2	13	10.5
P53367	ARFIP1	Arfaptin-1	Arfaptin-1 OS=Homo sapiens GN=ARFIP1 PE=1 SV=2 - [ARFP1_HUMAN]	373	41.7	0.968	1.022	1.158	1.261	1.12	8	9	10	9	5.5	9	7	9	11.3	9	9	9	4.7
P53365	ARFIP2	Arfaptin-2	Arfaptin-2 OS=Homo sapiens GN=ARFIP2 PE=1 SV=1 - [ARFP2_HUMAN]	341	37.8	0.982	1.031	1.09	1.026	0.895	5	6	9	8	15.7	8	8.7	8	10.8	8	5.9	8	8.8
Q13795	ARFRP1	ADP-ribosylation factor-related protein 1	ADP-ribosylation factor-related protein 1 OS=Homo sapiens GN=ARFRP1 PE=1 SV=1 - [ARFRP_HUMAN]	201	22.6	0.991	0.994	1.062	1.038	0.867	6	6	9	9	7.1	9	4.5	9	6.8	9	6.8	9	6.8
P05089	ARG1	Arginase-1	Arginase-1 OS=Homo sapiens GN=ARG1 PE=1 SV=2 - [ARGI1_HUMAN]	322	34.7	0.799	0.299	7.919	0.645	1.091	1	1	1	1	NaN	1	NaN	1	NaN	1	NaN	1	NaN
Q9NWB6	ARGLU1	Arginine and glutamate-rich protein 1	Arginine and glutamate-rich protein 1 OS=Homo sapiens GN=ARGLU1 PE=1 SV=1 - [ARGL1_HUMAN]	273	33.2	0.985	1.034	1.114	1.105	1.067	5	6	7	6	16	6	5.9	6	8.8	6	10.1	6	17
Q07960	ARHGAP1	Rho GTPase-activating protein 1	Rho GTPase-activating protein 1 OS=Homo sapiens GN=ARHGAP1 PE=1 SV=1 - [RHG01_HUMAN]	439	50.4	0.994	0.974	1.102	1.231	1.043	11	11	22	22	8.5	22	8.9	22	12.9	22	11.9	22	9.3
Q6P4F7	ARHGAP11A	Rho GTPase-activating protein 11A	Rho GTPase-activating protein 11A OS=Homo sapiens GN=ARHGAP11A PE=1 SV=2 - [RHGBA_HUMAN]	1023	113.8	0.677	0.651	0.622	0.623	0.816	2	2	2	2	27.3	2	39.4	2	35.3	2	62	2	24.8
Q8IWW6	ARHGAP12	Rho GTPase-activating protein 12	Rho GTPase-activating protein 12 OS=Homo sapiens GN=ARHGAP12 PE=1 SV=1 - [RHG12_HUMAN]	846	96.2	0.864	0.847	0.958	1.107	1.115	1	1	1	1	NaN	1	NaN	1	NaN	1	NaN	1	NaN
Q53QZ3	ARHGAP15	Rho GTPase-activating protein 15	Rho GTPase-activating protein 15 OS=Homo sapiens GN=ARHGAP15 PE=1 SV=2 - [RHG15_HUMAN]	475	54.5	0.995	1.106	1.138	1.173	1.048	14	15	25	24	5	24	10.3	24	7.3	24	6.7	24	9.1
Q68EM7	ARHGAP17	Rho GTPase-activating protein 17	Rho GTPase-activating protein 17 OS=Homo sapiens GN=ARHGAP17 PE=1 SV=1 - [RHG17_HUMAN]	881	95.4	0.992	1.119	1.314	1.475	1.295	11	11	14	14	8.9	14	8	14	8.5	14	12.4	14	12.2
H7BXR8	ARHGAP19		Rho GTPase-activating protein 19 OS=Homo sapiens GN=ARHGAP19 PE=2 SV=1 - [H7BXR8_HUMAN]	494	55.8	0.969	1.124	1.578	1.538	1.108	9	9	18	17	16.6	17	20.5	17	22.3	17	23.2	17	14.9
E9PNT2	ARHGAP27		Rho GTPase-activating protein 27 OS=Homo sapiens GN=ARHGAP27 PE=2 SV=1 - [E9PNT2_HUMAN]	667	75	1.09	1.036	1.078	1.092	0.964	3	3	4	4	9	4	4	4	19.9	4	25.5	4	1.9
Q7Z6I6	ARHGAP30	Rho GTPase-activating protein 30	Rho GTPase-activating protein 30 OS=Homo sapiens GN=ARHGAP30 PE=1 SV=3 - [RHG30_HUMAN]	1101	118.5	0.945	1.07	1.284	1.407	1.149	14	14	15	15	7.9	15	7.8	15	12.8	15	13	15	10.4
Q9NRY4	ARHGAP35	Rho GTPase-activating protein 35	Rho GTPase-activating protein 35 OS=Homo sapiens GN=ARHGAP35 PE=1 SV=3 - [RHG35_HUMAN]	1499	170.4	1.022	1.063	1.209	1.369	1.201	6	6	6	6	15.5	6	8.9	6	15.7	6	17.2	6	13.5
P98171	ARHGAP4	Rho GTPase-activating protein 4	Rho GTPase-activating protein 4 OS=Homo sapiens GN=ARHGAP4 PE=1 SV=2 - [RHG04_HUMAN]	946	105	1.02	0.874	0.989	1.174	0.937	18	18	20	19	4.5	19	10.5	19	8.6	18	12	19	6
Q13017	ARHGAP5	Rho GTPase-activating protein 5	Rho GTPase-activating protein 5 OS=Homo sapiens GN=ARHGAP5 PE=1 SV=2 - [RHG05_HUMAN]	1502	172.4	0.945	1.093	1.076	1.126	0.949	3	3	3	3	2.2	3	5.7	3	12.2	3	7	3	3.2
Q9BRR9	ARHGAP9	Rho GTPase-activating protein 9	Rho GTPase-activating protein 9 OS=Homo sapiens GN=ARHGAP9 PE=1 SV=2 - [RHG09_HUMAN]	750	83.2	0.997	1.213	1.437	1.854	1.361	4	5	5	4	4.5	4	6.4	4	16	4	3.2	4	14.7
P52565	ARHGDIA	Rho GDP-dissociation inhibitor 1	Rho GDP-dissociation inhibitor 1 OS=Homo sapiens GN=ARHGDIA PE=1 SV=3 - [GDIR1_HUMAN]	204	23.2	1.001	0.915	0.948	1.011	0.949	8	8	21	21	6.1	21	9.5	21	13.5	21	11.2	21	6.8
P52566	ARHGDIB	Rho GDP-dissociation inhibitor 2	Rho GDP-dissociation inhibitor 2 OS=Homo sapiens GN=ARHGDIB PE=1 SV=3 - [GDIR2_HUMAN]	201	23	1.037	1.014	1.123	1.176	1.066	14	14	72	72	9.1	72	9.6	72	13.5	72	8.9	72	15.7
Q92888	ARHGEF1	Rho guanine nucleotide exchange factor 1	Rho guanine nucleotide exchange factor 1 OS=Homo sapiens GN=ARHGEF1 PE=1 SV=2 - [ARHG1_HUMAN]	912	102.4	1.013	0.966	1.046	1.125	1.054	22	22	30	30	9.3	30	7.6	30	12.7	30	9.4	30	7.7
B4DTE2	ARHGEF10L		Rho guanine nucleotide exchange factor 10-like protein OS=Homo sapiens GN=ARHGEF10L PE=2 SV=1 - [B4DTE2_HUMAN]	488	55.1	0.951	1.071	1.135	0.909	0.997	1	1	1	1	NaN	1	NaN	1	NaN	1	NaN	1	NaN
M0R150	ARHGEF18		Uncharacterized protein (Fragment) OS=Homo sapiens PE=4 SV=1 - [M0R150_HUMAN]	1114	124.8	0.922	0.896	0.879	0.873	0.898	9	10	12	11	17.1	11	22.3	11	14.8	11	11.2	11	8.2
Q92974	ARHGEF2	Rho guanine nucleotide exchange factor 2	Rho guanine nucleotide exchange factor 2 OS=Homo sapiens GN=ARHGEF2 PE=1 SV=4 - [ARHG2_HUMAN]	986	111.5	0.953	1.036	1.139	1.16	1.116	29	29	48	48	9.3	48	11.2	48	13.7	48	13.7	48	11.2
Q15052	ARHGEF6	Rho guanine nucleotide exchange factor 6	Rho guanine nucleotide exchange factor 6 OS=Homo sapiens GN=ARHGEF6 PE=1 SV=2 - [ARHG6_HUMAN]	776	87.4	1.036	1.175	0.958	0.797	1.066	16	21	30	20	4.8	20	10.8	20	12.3	20	17.8	20	8.6
B1ALK7	ARHGEF7		Rho guanine nucleotide exchange factor 7 OS=Homo sapiens GN=ARHGEF7 PE=2 SV=1 - [B1ALK7_HUMAN]	705	79.8	1.076	1.188	1.23	1.042	1.26	15	20	36	26	7.9	26	6.4	26	14.1	26	11.2	26	6.5
O14497	ARID1A	AT-rich interactive domain-containing protein 1A	AT-rich interactive domain-containing protein 1A OS=Homo sapiens GN=ARID1A PE=1 SV=3 - [ARI1A_HUMAN]	2285	241.9	1.004	0.974	0.937	0.966	1.022	33	36	52	45	5.6	45	11	45	9.3	45	12	45	9.2
G3XAA0	ARID1B		AT rich interactive domain 1B (SWI1-like), isoform CRA_a OS=Homo sapiens GN=ARID1B PE=2 SV=1 - [G3XAA0_HUMAN]	2231	236.4	1.003	0.968	0.986	1.022	1.267	7	10	14	7	12.4	7	8.1	7	16.2	7	19.3	7	27.3
Q68CP9	ARID2	AT-rich interactive domain-containing protein 2	AT-rich interactive domain-containing protein 2 OS=Homo sapiens GN=ARID2 PE=1 SV=2 - [ARID2_HUMAN]	1835	197.3	1	1.066	0.978	0.976	1.128	16	16	20	20	4.8	20	5.5	20	10.7	20	8.9	20	10.4
K7EJ04	ARID3A		AT-rich interactive domain-containing protein 3A (Fragment) OS=Homo sapiens GN=ARID3A PE=4 SV=1 - [K7EJ04_HUMAN]	182	19.7	0.918	0.881	0.675	0.711	0.963	1	1	1	1	NaN	1	NaN	1	NaN	1	NaN	1	NaN
Q8IVW6	ARID3B	AT-rich interactive domain-containing protein 3B	AT-rich interactive domain-containing protein 3B OS=Homo sapiens GN=ARID3B PE=1 SV=2 - [ARI3B_HUMAN]	561	60.6	1.114	0.813	0.763	0.693	0.814	2	2	2	2	3.8	2	8.2	2	22.5	2	19.9	2	1.3
P29374	ARID4A	AT-rich interactive domain-containing protein 4A	AT-rich interactive domain-containing protein 4A OS=Homo sapiens GN=ARID4A PE=1 SV=3 - [ARI4A_HUMAN]	1257	142.7	1.068	1.006	1.037	1.001	0.986	6	8	8	6	12.8	6	4.7	6	5.4	6	6.6	6	3.7
Q4LE39	ARID4B	AT-rich interactive domain-containing protein 4B	AT-rich interactive domain-containing protein 4B OS=Homo sapiens GN=ARID4B PE=1 SV=2 - [ARI4B_HUMAN]	1312	147.7	1.019	0.99	1.063	1.049	1.07	9	10	10	9	6.3	9	9.6	9	11.3	9	8.1	9	7.6
Q9Y4X5	ARIH1	E3 ubiquitin-protein ligase ARIH1	E3 ubiquitin-protein ligase ARIH1 OS=Homo sapiens GN=ARIH1 PE=1 SV=2 - [ARI1_HUMAN]	557	64.1	1.017	1.101	1.229	1.373	1.236	11	11	15	15	6.1	15	6.3	15	10.8	15	8	15	7
O95376	ARIH2	E3 ubiquitin-protein ligase ARIH2	E3 ubiquitin-protein ligase ARIH2 OS=Homo sapiens GN=ARIH2 PE=1 SV=1 - [ARI2_HUMAN]	493	57.8	0.959	0.933	0.925	0.933	0.921	8	8	11	11	10.3	11	16.2	11	8.9	11	9.8	11	8.7
B4DWW1	ARL1		ADP-ribosylation factor-like protein 1 OS=Homo sapiens GN=ARL1 PE=2 SV=1 - [B4DWW1_HUMAN]	164	18.6	0.947	1.116	1.071	1.057	1.037	7	7	16	16	11.2	16	8.7	16	7	16	7.2	16	8
B4DRI8	ARL13B		ADP-ribosylation factor-like protein 13B OS=Homo sapiens GN=ARL13B PE=2 SV=1 - [B4DRI8_HUMAN]	149	16.9	1.64	1.142	1.067	1.253	1.607	1	1	1	1	NaN	1	NaN	1	NaN	1	NaN	1	NaN
E9PRK7	ARL14EP		ARL14 effector protein (Fragment) OS=Homo sapiens GN=ARL14EP PE=2 SV=1 - [E9PRK7_HUMAN]	168	19.1	0.983	0.795	0.961	0.924	0.979	2	2	3	3	29.3	3	2.9	3	10.5	3	2.6	3	7.9
Q9NXU5	ARL15	ADP-ribosylation factor-like protein 15	ADP-ribosylation factor-like protein 15 OS=Homo sapiens GN=ARL15 PE=1 SV=1 - [ARL15_HUMAN]	204	22.9	1.061	1.62	2.096	2.338	1.923	2	2	2	2	9.9	2	29.4	2	27.2	2	27	2	15.8
P36404	ARL2	ADP-ribosylation factor-like protein 2	ADP-ribosylation factor-like protein 2 OS=Homo sapiens GN=ARL2 PE=1 SV=4 - [ARL2_HUMAN]	184	20.9	0.99	0.864	0.931	0.91	0.862	4	4	12	12	5.4	12	6.6	12	15.2	12	5.7	12	10.9
H3BU49	ARL2BP		ADP-ribosylation factor-like protein 2-binding protein OS=Homo sapiens GN=ARL2BP PE=2 SV=1 - [H3BU49_HUMAN]	123	13.8	1.053	1.185	1.257	1.244	1.456	2	2	3	3	6.3	3	11.2	3	9.1	3	0.5	3	5.9
P36405	ARL3	ADP-ribosylation factor-like protein 3	ADP-ribosylation factor-like protein 3 OS=Homo sapiens GN=ARL3 PE=1 SV=2 - [ARL3_HUMAN]	182	20.4	0.986	0.962	1.191	1.185	1.139	9	9	14	14	7.9	14	12.1	14	12.1	14	15.2	14	13.4
P56559	ARL4C	ADP-ribosylation factor-like protein 4C	ADP-ribosylation factor-like protein 4C OS=Homo sapiens GN=ARL4C PE=1 SV=1 - [ARL4C_HUMAN]	192	21.5	0.808	1.13	0.708	0.484	1.149	5	5	5	5	7	5	11.2	5	10.7	5	4.1	5	4.7
Q9Y689	ARL5A	ADP-ribosylation factor-like protein 5A	ADP-ribosylation factor-like protein 5A OS=Homo sapiens GN=ARL5A PE=1 SV=1 - [ARL5A_HUMAN]	179	20.7	0.937	0.899	1.018	0.928	0.818	1	1	2	2	12.7	2	9.1	2	8.9	2	3.8	2	2
Q9H0F7	ARL6	ADP-ribosylation factor-like protein 6	ADP-ribosylation factor-like protein 6 OS=Homo sapiens GN=ARL6 PE=1 SV=1 - [ARL6_HUMAN]	186	21.1	0.983	1.155	0.948	0.989	1.086	4	4	4	4	7.7	4	2.7	4	24.4	4	11.9	4	4.9
F5GXP4	ARL6IP1		ADP-ribosylation factor-like protein 6-interacting protein 1 OS=Homo sapiens GN=ARL6IP1 PE=2 SV=1 - [F5GXP4_HUMAN]	174	20.2	1.22	1.052	1.553	1.922	0.99	2	2	5	5	12.1	5	3.5	5	15.6	5	15.2	5	1.2
B3V0L1	ARL6IP4		ADP-ribosylation factor-like protein 6-interacting protein 4 OS=Homo sapiens GN=ARL6IP4 PE=2 SV=1 - [B3V0L1_HUMAN]	226	25.3	1.056	1.086	0.968	0.891	1.032	6	6	7	7	4.2	7	5.4	7	17.2	7	19.8	7	2.3
O75915	ARL6IP5	PRA1 family protein 3	PRA1 family protein 3 OS=Homo sapiens GN=ARL6IP5 PE=1 SV=1 - [PRAF3_HUMAN]	188	21.6	0.997	1.192	1.422	1.579	1.29	4	4	7	7	3.1	7	9.4	7	19.5	7	9.8	7	5.8
Q8N6S5	ARL6IP6	ADP-ribosylation factor-like protein 6-interacting protein 6	ADP-ribosylation factor-like protein 6-interacting protein 6 OS=Homo sapiens GN=ARL6IP6 PE=1 SV=1 - [AR6P6_HUMAN]	226	24.7	0.892	0.847	0.85	0.752	0.897	2	2	2	2	3.9	2	2.8	2	3.5	2	7.5	2	3
Q96BM9	ARL8A	ADP-ribosylation factor-like protein 8A	ADP-ribosylation factor-like protein 8A OS=Homo sapiens GN=ARL8A PE=1 SV=1 - [ARL8A_HUMAN]	186	21.4	1.206	0.999	1.35	1.496	1.241	1	6	10	2	28	2	10.6	2	15	2	4.5	2	22
Q9NVJ2	ARL8B	ADP-ribosylation factor-like protein 8B	ADP-ribosylation factor-like protein 8B OS=Homo sapiens GN=ARL8B PE=1 SV=1 - [ARL8B_HUMAN]	186	21.5	1.039	1.077	1.297	1.475	1.056	1	5	10	3	2.6	3	3.9	3	12.5	3	2.1	3	15.9
Q9NVT9	ARMC1	Armadillo repeat-containing protein 1	Armadillo repeat-containing protein 1 OS=Homo sapiens GN=ARMC1 PE=1 SV=1 - [ARMC1_HUMAN]	282	31.3	0.938	0.94	0.779	0.761	0.875	2	2	4	4	3.4	4	3.5	4	10.7	4	2	4	3.9
Q8N2F6	ARMC10	Armadillo repeat-containing protein 10	Armadillo repeat-containing protein 10 OS=Homo sapiens GN=ARMC10 PE=1 SV=1 - [ARM10_HUMAN]	343	37.5	0.989	0.907	0.887	1.015	0.933	4	4	7	7	16.1	7	7.6	7	15.3	7	16.4	7	10.8
Q6NXE6	ARMC6	Armadillo repeat-containing protein 6	Armadillo repeat-containing protein 6 OS=Homo sapiens GN=ARMC6 PE=1 SV=2 - [ARMC6_HUMAN]	501	54.1	0.95	0.966	0.964	0.889	1.029	11	11	16	16	10.2	16	5	16	7.2	16	11.5	16	6
J3KST7	ARMC7		Armadillo repeat containing 7, isoform CRA_c OS=Homo sapiens GN=ARMC7 PE=4 SV=1 - [J3KST7_HUMAN]	82	9.2	1.092	0.845	0.79	0.861	0.817	1	1	1	1	NaN	1	NaN	1	NaN	1	NaN	1	NaN
A8MTG8	ARMC8		Armadillo repeat-containing protein 8 OS=Homo sapiens GN=ARMC8 PE=2 SV=3 - [A8MTG8_HUMAN]	663	74.3	0.996	0.962	0.873	0.972	1.016	14	14	19	19	9.5	19	13.7	19	8.8	19	15.7	19	12.4
Q9UH62	ARMCX3	Armadillo repeat-containing X-linked protein 3	Armadillo repeat-containing X-linked protein 3 OS=Homo sapiens GN=ARMCX3 PE=1 SV=1 - [ARMX3_HUMAN]	379	42.5	0.984	1.221	1.72	2.001	1.196	6	6	7	7	12.1	7	4.4	7	9.6	7	1.6	7	13.3
Q6P1M9	ARMCX5	Armadillo repeat-containing X-linked protein 5	Armadillo repeat-containing X-linked protein 5 OS=Homo sapiens GN=ARMCX5 PE=2 SV=1 - [ARMX5_HUMAN]	558	62.3	1.126	0.956	0.822	0.8	1.091	2	2	2	2	4.6	2	7.4	2	38.3	2	48.6	2	15.5
F8WAP6	ARNT		Aryl hydrocarbon receptor nuclear translocator OS=Homo sapiens GN=ARNT PE=2 SV=1 - [F8WAP6_HUMAN]	787	86.3	0.859	1.27	1.327	1.054	1.132	2	2	2	2	14.5	2	16.2	2	0.6	2	3.5	2	17.6
Q92747	ARPC1A	Actin-related protein 2/3 complex subunit 1A	Actin-related protein 2/3 complex subunit 1A OS=Homo sapiens GN=ARPC1A PE=1 SV=2 - [ARC1A_HUMAN]	370	41.5	0.965	1.096	1.228	1.224	1.158	9	9	12	12	4.9	12	7.5	12	10.8	12	11.6	12	5.7
O15143	ARPC1B	Actin-related protein 2/3 complex subunit 1B	Actin-related protein 2/3 complex subunit 1B OS=Homo sapiens GN=ARPC1B PE=1 SV=3 - [ARC1B_HUMAN]	372	40.9	1.004	1.021	1.137	1.268	1.107	13	13	30	28	9.4	28	6.9	28	9.5	28	8.3	28	6.4
O15144	ARPC2	Actin-related protein 2/3 complex subunit 2	Actin-related protein 2/3 complex subunit 2 OS=Homo sapiens GN=ARPC2 PE=1 SV=1 - [ARPC2_HUMAN]	300	34.3	1.011	0.996	1.127	1.204	1.103	16	17	37	34	7.7	34	7.5	34	10	34	7.4	34	8.3
O15145	ARPC3	Actin-related protein 2/3 complex subunit 3	Actin-related protein 2/3 complex subunit 3 OS=Homo sapiens GN=ARPC3 PE=1 SV=3 - [ARPC3_HUMAN]	178	20.5	0.99	1.036	0.986	1.042	1.103	4	4	4	4	2.4	4	4.9	4	16.5	4	18.3	4	1.7
F8WDD7	ARPC4		Actin-related protein 2/3 complex subunit 4 OS=Homo sapiens GN=ARPC4 PE=2 SV=1 - [F8WDD7_HUMAN]	113	13	1.05	1.119	1.109	1.187	1.147	5	5	12	12	3.7	12	7	12	11.5	12	7.4	12	20.3
O15511	ARPC5	Actin-related protein 2/3 complex subunit 5	Actin-related protein 2/3 complex subunit 5 OS=Homo sapiens GN=ARPC5 PE=1 SV=3 - [ARPC5_HUMAN]	151	16.3	1	1.062	1.132	1.213	1.224	5	5	14	13	9.8	14	12.3	14	14.6	14	14.9	14	16
Q9BPX5	ARPC5L	Actin-related protein 2/3 complex subunit 5-like protein	Actin-related protein 2/3 complex subunit 5-like protein OS=Homo sapiens GN=ARPC5L PE=1 SV=1 - [ARP5L_HUMAN]	153	16.9	1.006	1.054	1.038	1.126	0.972	4	4	5	5	2.9	5	11.3	5	8.7	5	9	5	9.3
H3BQ52	ARPP19		cAMP-regulated phosphoprotein 19 OS=Homo sapiens GN=ARPP19 PE=2 SV=1 - [H3BQ52_HUMAN]	71	7.7	0.945	0.942	0.825	0.904	0.834	2	3	4	3	3.8	3	6.9	3	6.3	3	6.3	3	2.2
Q9UBL0	ARPP21	cAMP-regulated phosphoprotein 21	cAMP-regulated phosphoprotein 21 OS=Homo sapiens GN=ARPP21 PE=1 SV=2 - [ARP21_HUMAN]	812	89.1	0.938	1.421	1.562	1.35	2.069	5	5	5	5	10.4	5	21.5	5	27.6	5	30.6	5	39.3
P32121	ARRB2	Beta-arrestin-2	Beta-arrestin-2 OS=Homo sapiens GN=ARRB2 PE=1 SV=2 - [ARRB2_HUMAN]	409	46.1	0.953	0.9	0.86	0.956	0.909	7	7	9	9	5.8	9	5.5	9	8.3	9	7.1	9	2.5
P15289	ARSA	Arylsulfatase A;Arylsulfatase A component B;Arylsulfatase A component C	Arylsulfatase A OS=Homo sapiens GN=ARSA PE=1 SV=3 - [ARSA_HUMAN]	507	53.6	1.043	1.148	1.981	2.409	1.738	2	3	4	3	11.1	3	11.4	3	14.9	3	24.7	3	10.9
E9PGI0	ARSK		Arylsulfatase K OS=Homo sapiens GN=ARSK PE=2 SV=1 - [E9PGI0_HUMAN]	395	44.9	1.002	0.968	0.7	0.721	0.852	1	1	1	1	NaN	1	NaN	1	NaN	1	NaN	1	NaN
Q9HBK9	AS3MT	Arsenite methyltransferase	Arsenite methyltransferase OS=Homo sapiens GN=AS3MT PE=1 SV=3 - [AS3MT_HUMAN]	375	41.7	1.057	1.102	1.296	1.311	1.31	12	12	17	17	8.6	17	4.1	17	11	17	7.4	17	9.1
E7ERV9	ASAH1		Acid ceramidase OS=Homo sapiens GN=ASAH1 PE=2 SV=1 - [E7ERV9_HUMAN]	305	34.6	0.986	1.133	1.433	1.724	1.357	5	5	6	6	6.1	6	7.1	6	8.1	6	1.7	6	8.4
Q9ULH1	ASAP1	Arf-GAP with SH3 domain, ANK repeat and PH domain-containing protein 1	Arf-GAP with SH3 domain, ANK repeat and PH domain-containing protein 1 OS=Homo sapiens GN=ASAP1 PE=1 SV=4 - [ASAP1_HUMAN]	1129	125.4	1.038	0.978	1.038	1.075	1.064	8	8	9	9	13.1	9	13.9	9	10	9	7.7	9	12.5
R4GN94	ASB9		Ankyrin repeat and SOCS box protein 9 (Fragment) OS=Homo sapiens GN=ASB9 PE=4 SV=1 - [R4GN94_HUMAN]	211	22.6	1.075	1.069	1.223	1.305	0.915	1	1	2	2	3.4	2	5.8	2	17.3	2	14.7	2	24
F5H874	ASCC1		Activating signal cointegrator 1 complex subunit 1 OS=Homo sapiens GN=ASCC1 PE=2 SV=1 - [F5H874_HUMAN]	379	43.6	1.012	1.098	1.134	1.026	1.082	4	4	4	4	7.7	4	5.8	4	15.4	4	2.9	4	4.4
Q9H1I8	ASCC2	Activating signal cointegrator 1 complex subunit 2	Activating signal cointegrator 1 complex subunit 2 OS=Homo sapiens GN=ASCC2 PE=1 SV=3 - [ASCC2_HUMAN]	757	86.3	0.947	1.104	1.139	1.04	1.084	9	9	12	12	9.5	12	16.5	12	9.1	12	12.9	12	11.4
Q8N3C0	ASCC3	Activating signal cointegrator 1 complex subunit 3	Activating signal cointegrator 1 complex subunit 3 OS=Homo sapiens GN=ASCC3 PE=1 SV=3 - [ASCC3_HUMAN]	2202	251.3	0.939	1.084	1.06	1.027	1.112	19	20	21	20	13.5	20	11.4	20	7.6	20	9	20	4.5
Q9Y294	ASF1A	Histone chaperone ASF1A	Histone chaperone ASF1A OS=Homo sapiens GN=ASF1A PE=1 SV=1 - [ASF1A_HUMAN]	204	23	1.012	1.326	1.22	1.061	1.273	7	7	15	15	7.4	15	10.5	15	11.2	15	6.2	15	8.5
Q9NVP2	ASF1B	Histone chaperone ASF1B	Histone chaperone ASF1B OS=Homo sapiens GN=ASF1B PE=1 SV=1 - [ASF1B_HUMAN]	202	22.4	1.049	1.095	0.947	0.755	1.091	3	3	5	5	7.1	5	8.8	5	7.1	5	11.8	5	8.4
F5H8F7	ASH2L		Set1/Ash2 histone methyltransferase complex subunit ASH2 OS=Homo sapiens GN=ASH2L PE=2 SV=1 - [F5H8F7_HUMAN]	489	55.3	0.98	0.875	0.85	0.874	0.916	13	13	22	20	8.5	20	13.1	20	7.9	20	8	20	10.8
P04424	ASL	Argininosuccinate lyase	Argininosuccinate lyase OS=Homo sapiens GN=ASL PE=1 SV=4 - [ARLY_HUMAN]	464	51.6	0.99	0.89	0.888	1.067	0.842	3	3	3	3	9.9	3	3.8	3	5.7	3	5.4	3	6.3
O95671	ASMTL	N-acetylserotonin O-methyltransferase-like protein	N-acetylserotonin O-methyltransferase-like protein OS=Homo sapiens GN=ASMTL PE=1 SV=3 - [ASML_HUMAN]	621	68.8	0.911	0.813	0.849	0.933	0.919	3	3	4	4	26.1	4	9.7	4	7.5	4	9	4	16.4
O43681	ASNA1	ATPase ASNA1	ATPase ASNA1 OS=Homo sapiens GN=ASNA1 PE=1 SV=2 - [ASNA_HUMAN]	348	38.8	0.987	0.994	1.115	1.108	0.999	7	7	17	17	9.2	17	7.1	17	10.2	17	9.7	17	7
P08243	ASNS	Asparagine synthetase [glutamine-hydrolyzing]	Asparagine synthetase [glutamine-hydrolyzing] OS=Homo sapiens GN=ASNS PE=1 SV=4 - [ASNS_HUMAN]	561	64.3	1.05	0.784	0.741	0.696	0.409	14	14	32	32	9.5	32	10.1	32	6.5	32	13.2	32	15.7
Q12797	ASPH	Aspartyl/asparaginyl beta-hydroxylase	Aspartyl/asparaginyl beta-hydroxylase OS=Homo sapiens GN=ASPH PE=1 SV=3 - [ASPH_HUMAN]	758	85.8	0.96	1.046	1.227	1.28	1.184	6	6	8	8	5.1	8	10.1	8	18.7	8	20	8	19.7
Q8IZT6	ASPM	Abnormal spindle-like microcephaly-associated protein	Abnormal spindle-like microcephaly-associated protein OS=Homo sapiens GN=ASPM PE=1 SV=2 - [ASPM_HUMAN]	3477	409.5	1.016	1.073	1.042	0.906	0.921	1	2	2	1	NaN	1	NaN	1	NaN	1	NaN	1	NaN
Q9BZE9	ASPSCR1	Tether containing UBX domain for GLUT4	Tether containing UBX domain for GLUT4 OS=Homo sapiens GN=ASPSCR1 PE=1 SV=1 - [ASPC1_HUMAN]	553	60.1	1.021	0.922	0.782	0.85	0.93	6	6	8	8	4.5	8	19.2	8	10.1	8	13	8	22.1
Q7L266	ASRGL1	Isoaspartyl peptidase/L-asparaginase;Isoaspartyl peptidase/L-asparaginase alpha chain;Isoaspartyl peptidase/L-asparaginase beta chain	Isoaspartyl peptidase/L-asparaginase OS=Homo sapiens GN=ASRGL1 PE=1 SV=2 - [ASGL1_HUMAN]	308	32	0.962	1.457	1.781	2.07	2.21	4	4	5	5	15.2	5	11.7	5	8.1	5	14	5	14.2
P00966	ASS1	Argininosuccinate synthase	Argininosuccinate synthase OS=Homo sapiens GN=ASS1 PE=1 SV=2 - [ASSY_HUMAN]	412	46.5	1.039	0.738	0.648	0.601	0.455	6	6	6	6	7.3	6	7	6	17.3	6	22.6	6	8.5
Q2TB18	ASTE1	Protein asteroid homolog 1	Protein asteroid homolog 1 OS=Homo sapiens GN=ASTE1 PE=2 SV=1 - [ASTE1_HUMAN]	679	77	0.934	0.999	0.9	0.817	0.922	2	2	2	2	18.2	2	4.8	2	12.5	2	23.2	2	8.7
Q9NVM9	ASUN	Protein asunder homolog	Protein asunder homolog OS=Homo sapiens GN=ASUN PE=1 SV=2 - [ASUN_HUMAN]	706	80.2	0.923	0.947	0.886	0.852	1.012	13	13	16	16	10.1	16	11.1	16	12.4	16	15.1	16	12
E7EWD6	ASXL2		Putative Polycomb group protein ASXL2 OS=Homo sapiens GN=ASXL2 PE=2 SV=1 - [E7EWD6_HUMAN]	1407	150.4	1.012	1.048	0.968	0.831	0.863	1	1	1	1	NaN	1	NaN	1	NaN	1	NaN	1	NaN
Q8NBU5	ATAD1	ATPase family AAA domain-containing protein 1	ATPase family AAA domain-containing protein 1 OS=Homo sapiens GN=ATAD1 PE=1 SV=1 - [ATAD1_HUMAN]	361	40.7	0.968	1.029	1.041	0.988	0.881	9	9	16	15	5.6	15	10.5	15	9.6	15	7.9	15	5.7
Q6PL18	ATAD2	ATPase family AAA domain-containing protein 2	ATPase family AAA domain-containing protein 2 OS=Homo sapiens GN=ATAD2 PE=1 SV=1 - [ATAD2_HUMAN]	1390	158.5	1.017	0.97	0.58	0.34	1.131	17	21	28	24	9	24	8.3	24	18.6	24	37.8	24	11.2
Q9ULI0	ATAD2B	ATPase family AAA domain-containing protein 2B	ATPase family AAA domain-containing protein 2B OS=Homo sapiens GN=ATAD2B PE=1 SV=3 - [ATD2B_HUMAN]	1458	164.8	0.935	1.084	1.041	0.889	1.234	11	14	17	14	9.6	14	8.9	14	8.4	14	6.2	14	4
H0Y2W2	ATAD3A		ATPase family AAA domain-containing protein 3A (Fragment) OS=Homo sapiens GN=ATAD3A PE=4 SV=1 - [H0Y2W2_HUMAN]	572	64.3	0.979	0.965	0.922	0.902	0.867	7	20	41	21	5.5	21	10.3	21	10.1	21	10.9	21	11.7
Q5T9A4	ATAD3B	ATPase family AAA domain-containing protein 3B	ATPase family AAA domain-containing protein 3B OS=Homo sapiens GN=ATAD3B PE=1 SV=1 - [ATD3B_HUMAN]	648	72.5	0.93	0.924	0.905	0.868	0.795	6	19	26	6	2.7	6	8.8	6	14.1	6	14.1	6	7.3
Q5SQI0	ATAT1	Alpha-tubulin N-acetyltransferase	Alpha-tubulin N-acetyltransferase OS=Homo sapiens GN=ATAT1 PE=1 SV=1 - [ATAT_HUMAN]	421	46.8	1.056	1.495	1.157	1.188	1.478	1	1	1	1	NaN	1	NaN	1	NaN	1	NaN	1	NaN
F5GXE4	ATE1	Arginyl-tRNA--protein transferase 1	Arginyl-tRNA--protein transferase 1 OS=Homo sapiens GN=ATE1 PE=2 SV=1 - [F5GXE4_HUMAN]	511	58.1	0.972	1.069	1.092	1.145	1.189	10	10	12	12	3.4	12	10.9	12	2.6	12	7	12	16.1
P18846	ATF1	Cyclic AMP-dependent transcription factor ATF-1	Cyclic AMP-dependent transcription factor ATF-1 OS=Homo sapiens GN=ATF1 PE=1 SV=2 - [ATF1_HUMAN]	271	29.2	0.792	0.656	0.479	0.41	0.609	2	2	2	2	32.9	2	56.4	2	40.9	2	11.6	2	38.9
B8ZZU6	ATF2		Cyclic AMP-dependent transcription factor ATF-2 OS=Homo sapiens GN=ATF2 PE=2 SV=1 - [B8ZZU6_HUMAN]	389	42.3	0.895	0.895	1.038	0.945	0.858	4	6	7	5	19.4	5	13.7	5	12.1	5	3.3	5	4.3
P18850	ATF6	Cyclic AMP-dependent transcription factor ATF-6 alpha;Processed cyclic AMP-dependent transcription factor ATF-6 alpha	Cyclic AMP-dependent transcription factor ATF-6 alpha OS=Homo sapiens GN=ATF6 PE=1 SV=3 - [ATF6A_HUMAN]	670	74.5	1.082	0.915	0.623	0.645	0.96	1	1	1	1	NaN	1	NaN	1	NaN	1	NaN	1	NaN
P17544	ATF7	Cyclic AMP-dependent transcription factor ATF-7	Cyclic AMP-dependent transcription factor ATF-7 OS=Homo sapiens GN=ATF7 PE=1 SV=2 - [ATF7_HUMAN]	494	52.9	0.992	1.015	1	0.952	1.134	4	6	7	5	13.9	5	18.1	5	8	5	16.4	5	4.7
G3V1U0	ATF7IP		Activating transcription factor 7 interacting protein, isoform CRA_f OS=Homo sapiens GN=ATF7IP PE=2 SV=1 - [G3V1U0_HUMAN]	1269	136.2	1.025	1.056	1.033	0.999	1.084	6	6	8	8	13.2	8	9.2	8	11.8	8	10.2	8	5.6
O94817	ATG12	Ubiquitin-like protein ATG12	Ubiquitin-like protein ATG12 OS=Homo sapiens GN=ATG12 PE=1 SV=1 - [ATG12_HUMAN]	140	15.1	1.072	0.877	0.844	0.828	0.863	2	2	2	2	0.5	2	2.1	2	3.1	2	2.1	2	2.4
O75143	ATG13	Autophagy-related protein 13	Autophagy-related protein 13 OS=Homo sapiens GN=ATG13 PE=1 SV=1 - [ATG13_HUMAN]	517	56.5	0.961	0.997	0.945	0.923	0.881	2	2	2	2	12.8	2	2.9	2	17.2	2	22.3	2	2.7
Q676U5	ATG16L1	Autophagy-related protein 16-1	Autophagy-related protein 16-1 OS=Homo sapiens GN=ATG16L1 PE=1 SV=2 - [A16L1_HUMAN]	607	68.2	1.089	1.03	0.984	1.118	0.874	5	5	5	5	11.5	5	7.7	5	1.7	5	11.4	5	15.3
H7C3T2	ATG2A		Autophagy-related protein 2 homolog A (Fragment) OS=Homo sapiens GN=ATG2A PE=4 SV=1 - [H7C3T2_HUMAN]	1742	190.6	0.951	1.012	1.249	1.216	1.067	2	2	3	3	5	3	5.8	3	11.8	3	0.7	3	4.2
Q9NT62	ATG3	Ubiquitin-like-conjugating enzyme ATG3	Ubiquitin-like-conjugating enzyme ATG3 OS=Homo sapiens GN=ATG3 PE=1 SV=1 - [ATG3_HUMAN]	314	35.8	0.991	0.998	1.004	0.967	0.976	8	8	16	16	12.1	16	6.1	16	12.5	16	16.6	16	14.3
G5E979	ATG4A		ATG4 autophagy related 4 homolog A (S. cerevisiae), isoform CRA_e OS=Homo sapiens GN=ATG4A PE=2 SV=1 - [G5E979_HUMAN]	231	26.5	0.855	0.942	0.947	1.079	0.819	1	1	1	1	NaN	1	NaN	1	NaN	1	NaN	1	NaN
Q9Y4P1	ATG4B	Cysteine protease ATG4B	Cysteine protease ATG4B OS=Homo sapiens GN=ATG4B PE=1 SV=2 - [ATG4B_HUMAN]	393	44.3	1.009	0.88	0.856	0.841	0.88	4	4	8	8	10.3	8	8.9	8	9.4	8	5.5	8	11.1
H7BZW5	ATG4C		Cysteine protease ATG4C (Fragment) OS=Homo sapiens GN=ATG4C PE=2 SV=2 - [H7BZW5_HUMAN]	110	12.3	1.166	1.103	1.166	0.986	1.3	1	1	1	1	NaN	1	NaN	1	NaN	1	NaN	1	NaN
Q9H1Y0	ATG5	Autophagy protein 5	Autophagy protein 5 OS=Homo sapiens GN=ATG5 PE=1 SV=2 - [ATG5_HUMAN]	275	32.4	1.056	0.971	0.887	0.948	0.932	6	6	7	6	9	7	6.7	6	13.5	6	15.9	7	15.5
O95352	ATG7	Ubiquitin-like modifier-activating enzyme ATG7	Ubiquitin-like modifier-activating enzyme ATG7 OS=Homo sapiens GN=ATG7 PE=1 SV=1 - [ATG7_HUMAN]	703	77.9	0.985	0.952	1.045	1.105	1.109	8	8	13	13	8.4	13	7.8	13	15.8	13	15.8	13	9.3
Q7Z3C6	ATG9A	Autophagy-related protein 9A	Autophagy-related protein 9A OS=Homo sapiens GN=ATG9A PE=1 SV=3 - [ATG9A_HUMAN]	839	94.4	0.975	1.064	1.485	1.592	1.098	2	2	2	2	13.7	2	13.2	2	11.1	2	12.1	2	4.8
E9PBU3	ATIC		Phosphoribosylaminoimidazolecarboxamide formyltransferase OS=Homo sapiens GN=ATIC PE=2 SV=1 - [E9PBU3_HUMAN]	591	64.5	1.003	0.951	0.928	0.893	0.876	31	31	122	118	6.3	118	11.9	118	12.3	118	10.7	118	11.7
B7Z7X8	ATL2		Atlastin-2 OS=Homo sapiens GN=ATL2 PE=2 SV=1 - [B7Z7X8_HUMAN]	565	64.5	0.984	1.049	1.085	1.081	0.997	8	8	11	11	10	11	9	11	13.7	11	20.3	11	10.4
Q6DD88	ATL3	Atlastin-3	Atlastin-3 OS=Homo sapiens GN=ATL3 PE=1 SV=1 - [ATLA3_HUMAN]	541	60.5	1.039	0.999	1.126	1.208	0.957	20	20	46	46	11.7	46	11.7	46	10.9	46	11.4	46	13.6
Q13315	ATM	Serine-protein kinase ATM	Serine-protein kinase ATM OS=Homo sapiens GN=ATM PE=1 SV=3 - [ATM_HUMAN]	3056	350.5	0.967	1.051	1.104	1.303	1.579	1	2	2	1	NaN	1	NaN	1	NaN	1	NaN	1	NaN
P54259	ATN1	Atrophin-1	Atrophin-1 OS=Homo sapiens GN=ATN1 PE=1 SV=3 - [ATN1_HUMAN]	1190	125.3	1.185	1.216	1.22	1.239	1.375	1	1	1	1	NaN	1	NaN	1	NaN	1	NaN	1	NaN
E5RGN3	ATOX1		Copper transport protein ATOX1 OS=Homo sapiens GN=ATOX1 PE=2 SV=1 - [E5RGN3_HUMAN]	59	6.3	1.111	1.015	0.907	0.945	1.445	3	3	4	4	6	4	5	4	5.2	4	4.1	4	6.2
Q9Y2G3	ATP11B	Probable phospholipid-transporting ATPase IF	Probable phospholipid-transporting ATPase IF OS=Homo sapiens GN=ATP11B PE=1 SV=2 - [AT11B_HUMAN]	1177	134.1	1.003	0.899	0.794	0.841	0.835	10	10	11	11	6.9	11	11.3	11	7.7	11	6.4	11	9.7
Q8NB49	ATP11C	Probable phospholipid-transporting ATPase IG	Probable phospholipid-transporting ATPase IG OS=Homo sapiens GN=ATP11C PE=1 SV=3 - [AT11C_HUMAN]	1132	129.4	0.904	1.032	1.091	1.059	1.124	7	7	9	9	11.4	9	12.3	9	14.9	9	8.5	9	17.4
Q9HD20	ATP13A1	Probable cation-transporting ATPase 13A1	Probable cation-transporting ATPase 13A1 OS=Homo sapiens GN=ATP13A1 PE=1 SV=2 - [AT131_HUMAN]	1204	132.9	0.968	0.995	1.127	1.231	1.098	12	12	12	12	3.5	12	12.2	12	16.2	12	15	12	20.7
Q9H7F0	ATP13A3	Probable cation-transporting ATPase 13A3	Probable cation-transporting ATPase 13A3 OS=Homo sapiens GN=ATP13A3 PE=1 SV=4 - [AT133_HUMAN]	1226	138	0.872	0.936	0.687	0.781	1.046	1	1	1	1	NaN	1	NaN	1	NaN	1	NaN	1	NaN
P05023	ATP1A1	Sodium/potassium-transporting ATPase subunit alpha-1	Sodium/potassium-transporting ATPase subunit alpha-1 OS=Homo sapiens GN=ATP1A1 PE=1 SV=1 - [AT1A1_HUMAN]	1023	112.8	0.952	1.009	1.067	1.098	1.117	24	38	84	55	7.7	55	9.7	55	6.5	55	6.1	55	6
P13637	ATP1A3	Sodium/potassium-transporting ATPase subunit alpha-3	Sodium/potassium-transporting ATPase subunit alpha-3 OS=Homo sapiens GN=ATP1A3 PE=1 SV=3 - [AT1A3_HUMAN]	1013	111.7	0.943	1.184	1.062	0.937	1.195	13	27	45	16	7.1	16	8.2	16	13.9	16	8.8	16	10.3
P54709	ATP1B3	Sodium/potassium-transporting ATPase subunit beta-3	Sodium/potassium-transporting ATPase subunit beta-3 OS=Homo sapiens GN=ATP1B3 PE=1 SV=1 - [AT1B3_HUMAN]	279	31.5	1.027	1.05	1.003	1.081	1.104	5	5	12	12	6.6	12	8.6	12	8.5	12	5.9	12	11.4
P16615	ATP2A2	Sarcoplasmic/endoplasmic reticulum calcium ATPase 2	Sarcoplasmic/endoplasmic reticulum calcium ATPase 2 OS=Homo sapiens GN=ATP2A2 PE=1 SV=1 - [AT2A2_HUMAN]	1042	114.7	0.997	1.057	1.157	1.159	0.985	25	29	61	49	6.9	49	12.5	49	16.3	49	11.6	49	11.5
Q93084	ATP2A3	Sarcoplasmic/endoplasmic reticulum calcium ATPase 3	Sarcoplasmic/endoplasmic reticulum calcium ATPase 3 OS=Homo sapiens GN=ATP2A3 PE=1 SV=2 - [AT2A3_HUMAN]	1043	113.9	0.996	0.94	0.971	0.983	0.941	18	22	41	28	10.1	28	6.8	28	15.9	28	10	28	8.1
P20020	ATP2B1	Plasma membrane calcium-transporting ATPase 1	Plasma membrane calcium-transporting ATPase 1 OS=Homo sapiens GN=ATP2B1 PE=1 SV=3 - [AT2B1_HUMAN]	1258	138.7	0.989	1.165	1.155	1.218	1.24	4	12	19	3	5.5	3	5.7	3	26	3	0.1	3	15.9
P23634	ATP2B4	Plasma membrane calcium-transporting ATPase 4	Plasma membrane calcium-transporting ATPase 4 OS=Homo sapiens GN=ATP2B4 PE=1 SV=2 - [AT2B4_HUMAN]	1241	137.8	1.003	1.127	1.328	1.368	1.435	17	25	49	34	7.5	34	9.4	34	12.4	34	9.9	34	13.7
H0Y9V7	ATP2C1		Calcium-transporting ATPase type 2C member 1 (Fragment) OS=Homo sapiens GN=ATP2C1 PE=3 SV=1 - [H0Y9V7_HUMAN]	903	99	0.913	1.204	1.304	1.458	1.07	11	11	14	14	10.7	14	15.1	14	9.3	14	13.1	14	18.3
P25705	ATP5A1	ATP synthase subunit alpha, mitochondrial	ATP synthase subunit alpha, mitochondrial OS=Homo sapiens GN=ATP5A1 PE=1 SV=1 - [ATPA_HUMAN]	553	59.7	1.041	1.01	1.055	1.093	0.924	26	26	136	131	8.2	131	13.2	131	12	131	11.5	131	13.1
P06576	ATP5B	ATP synthase subunit beta, mitochondrial	ATP synthase subunit beta, mitochondrial OS=Homo sapiens GN=ATP5B PE=1 SV=3 - [ATPB_HUMAN]	529	56.5	1.009	0.961	1.061	1.043	0.889	25	25	174	159	8.3	159	12	159	14	159	11.4	159	11.1
P36542	ATP5C1	ATP synthase subunit gamma, mitochondrial	ATP synthase subunit gamma, mitochondrial OS=Homo sapiens GN=ATP5C1 PE=1 SV=1 - [ATPG_HUMAN]	298	33	1.044	0.915	1.061	1.061	0.81	9	9	29	29	6.2	29	5.7	29	9.3	29	7.5	29	14.2
P30049	ATP5D	ATP synthase subunit delta, mitochondrial	ATP synthase subunit delta, mitochondrial OS=Homo sapiens GN=ATP5D PE=1 SV=2 - [ATPD_HUMAN]	168	17.5	1.009	0.936	0.952	1.006	0.943	1	1	3	3	0.1	3	3.2	3	4.1	3	3.7	3	7.7
P56381	ATP5E	ATP synthase subunit epsilon, mitochondrial	ATP synthase subunit epsilon, mitochondrial OS=Homo sapiens GN=ATP5E PE=1 SV=2 - [ATP5E_HUMAN]	51	5.8	1.071	0.979	0.905	1.079	1.05	2	2	2	2	0.8	2	19	2	6.7	2	18.7	2	30
Q5QNZ2	ATP5F1		ATP synthase subunit b, mitochondrial OS=Homo sapiens GN=ATP5F1 PE=2 SV=1 - [Q5QNZ2_HUMAN]	195	22.3	1	0.929	1.022	1.006	0.867	10	11	18	17	3.3	17	9.1	17	16	17	9.6	17	6.7
D6R9H7	ATP5G1		ATP synthase lipid-binding protein, mitochondrial OS=Homo sapiens GN=ATP5G1 PE=2 SV=1 - [D6R9H7_HUMAN]	99	10.2	1.003	1.129	1.181	1.333	1.106	1	1	2	2	9.8	2	0.6	2	4.3	2	2.7	2	5.5
O75947	ATP5H	ATP synthase subunit d, mitochondrial	ATP synthase subunit d, mitochondrial OS=Homo sapiens GN=ATP5H PE=1 SV=3 - [ATP5H_HUMAN]	161	18.5	1.061	0.998	1.093	1.105	0.923	11	11	39	39	7.6	39	9.4	39	12.4	39	5.8	39	12.3
P56385	ATP5I	ATP synthase subunit e, mitochondrial	ATP synthase subunit e, mitochondrial OS=Homo sapiens GN=ATP5I PE=1 SV=2 - [ATP5I_HUMAN]	69	7.9	1.058	1	0.967	1.005	0.91	2	2	9	9	2.3	9	6.3	9	19.3	9	11.8	9	6.4
P18859	ATP5J	ATP synthase-coupling factor 6, mitochondrial	ATP synthase-coupling factor 6, mitochondrial OS=Homo sapiens GN=ATP5J PE=1 SV=1 - [ATP5J_HUMAN]	108	12.6	1.068	1.067	1.277	1.267	0.965	6	6	14	14	3.6	14	16.2	14	2.7	14	12.4	14	11.3
G3V325	ATP5J2-PTCD1		Pentatricopeptide repeat-containing protein 1, mitochondrial OS=Homo sapiens GN=ATP5J2-PTCD1 PE=4 SV=1 - [G3V325_HUMAN]	749	84.1	0.968	0.964	0.95	1.001	0.858	4	4	8	8	3.1	8	6	8	6.3	8	5.8	8	10.3
E9PN17	ATP5L		ATP synthase subunit g, mitochondrial OS=Homo sapiens GN=ATP5L PE=2 SV=1 - [E9PN17_HUMAN]	76	8.4	1.098	1.186	1.169	1.188	1.078	2	2	5	5	4.8	5	5.3	5	12.4	5	5.6	5	3.9
P48047	ATP5O	ATP synthase subunit O, mitochondrial	ATP synthase subunit O, mitochondrial OS=Homo sapiens GN=ATP5O PE=1 SV=1 - [ATPO_HUMAN]	213	23.3	1.009	0.917	1.013	1.04	0.845	9	9	19	19	6.3	19	6.5	19	17.6	19	15.3	19	15.3
Q99766	ATP5S	ATP synthase subunit s, mitochondrial	ATP synthase subunit s, mitochondrial OS=Homo sapiens GN=ATP5S PE=1 SV=3 - [ATP5S_HUMAN]	215	24.8	0.949	0.747	0.831	0.911	0.84	2	2	3	3	19.6	3	6.4	3	37.7	3	46.1	3	15.1
M0QZP7	ATP5SL		ATP synthase subunit s-like protein (Fragment) OS=Homo sapiens GN=ATP5SL PE=4 SV=1 - [M0QZP7_HUMAN]	150	16.9	1.097	1.254	1.392	1.145	0.901	1	1	4	4	7.4	4	20.5	4	2	4	14.7	4	15.7
Q15904	ATP6AP1	V-type proton ATPase subunit S1	V-type proton ATPase subunit S1 OS=Homo sapiens GN=ATP6AP1 PE=1 SV=2 - [VAS1_HUMAN]	470	52	0.971	1.004	0.968	0.962	0.948	6	6	10	10	8.9	10	13.4	10	8.3	10	15.5	10	10.8
B7Z413	ATP6AP2		Renin receptor OS=Homo sapiens GN=ATP6AP2 PE=2 SV=1 - [B7Z413_HUMAN]	274	30.9	0.895	0.938	0.99	1.05	0.942	6	6	7	7	10.4	7	25.6	7	6.6	7	6.3	7	21.4
Q9Y487	ATP6V0A2	V-type proton ATPase 116 kDa subunit a isoform 2	V-type proton ATPase 116 kDa subunit a isoform 2 OS=Homo sapiens GN=ATP6V0A2 PE=1 SV=2 - [VPP2_HUMAN]	856	98	0.915	0.922	0.809	0.781	1.072	6	6	9	9	11.5	9	5.2	9	9.6	9	15.7	9	9.2
P61421	ATP6V0D1	V-type proton ATPase subunit d 1	V-type proton ATPase subunit d 1 OS=Homo sapiens GN=ATP6V0D1 PE=1 SV=1 - [VA0D1_HUMAN]	351	40.3	1.002	1.058	1.057	1.23	1.004	7	7	7	7	7.8	7	4.7	7	7	7	10.4	7	5.7
B7Z1R5	ATP6V1A		V-type proton ATPase catalytic subunit A OS=Homo sapiens GN=ATP6V1A PE=2 SV=1 - [B7Z1R5_HUMAN]	584	64.7	1.001	1.012	1.159	1.25	1.031	26	26	53	52	8.3	52	14.3	52	11.5	52	10.4	52	9.5
P21281	ATP6V1B2	V-type proton ATPase subunit B, brain isoform	V-type proton ATPase subunit B, brain isoform OS=Homo sapiens GN=ATP6V1B2 PE=1 SV=3 - [VATB2_HUMAN]	511	56.5	0.998	0.958	1.027	1.096	1.004	22	22	56	55	7.6	56	10.7	56	14.7	56	12.5	56	9.5
P21283	ATP6V1C1	V-type proton ATPase subunit C 1	V-type proton ATPase subunit C 1 OS=Homo sapiens GN=ATP6V1C1 PE=1 SV=4 - [VATC1_HUMAN]	382	43.9	1.002	0.934	1.006	1.061	0.907	15	15	22	22	6.3	22	8.9	22	8.6	22	6.4	22	7.8
Q9Y5K8	ATP6V1D	V-type proton ATPase subunit D	V-type proton ATPase subunit D OS=Homo sapiens GN=ATP6V1D PE=1 SV=1 - [VATD_HUMAN]	247	28.2	0.949	1.064	1.149	1.122	1.116	10	10	14	14	12.7	14	19.5	14	16.6	14	31.7	14	13.7
P36543	ATP6V1E1	V-type proton ATPase subunit E 1	V-type proton ATPase subunit E 1 OS=Homo sapiens GN=ATP6V1E1 PE=1 SV=1 - [VATE1_HUMAN]	226	26.1	1.006	0.987	1.064	1.124	1.025	11	12	28	25	6.9	25	7.1	25	10.6	25	11.3	25	14
Q16864	ATP6V1F	V-type proton ATPase subunit F	V-type proton ATPase subunit F OS=Homo sapiens GN=ATP6V1F PE=1 SV=2 - [VATF_HUMAN]	119	13.4	0.943	1.034	1.052	1.068	1.033	6	6	9	9	4.9	9	7.1	9	2.9	9	6.3	9	10.2
O75348	ATP6V1G1	V-type proton ATPase subunit G 1	V-type proton ATPase subunit G 1 OS=Homo sapiens GN=ATP6V1G1 PE=1 SV=3 - [VATG1_HUMAN]	118	13.7	0.995	0.996	1.12	1.149	0.976	2	2	2	2	2.9	2	3.8	2	3.4	2	6.4	2	8.7
F2Z307	ATP6V1G2-DDX39B		Protein ATP6V1G2-DDX39B OS=Homo sapiens GN=ATP6V1G2-DDX39B PE=2 SV=1 - [F2Z307_HUMAN]	99	11.3	1.109	0.919	1.06	0.958	1.429	1	1	1	1	NaN	1	NaN	1	NaN	1	NaN	1	NaN
Q9UI12	ATP6V1H	V-type proton ATPase subunit H	V-type proton ATPase subunit H OS=Homo sapiens GN=ATP6V1H PE=1 SV=1 - [VATH_HUMAN]	483	55.8	1.004	0.998	0.986	1.098	1.029	8	8	20	20	9	20	12.8	20	8.3	20	18.7	20	12.3
Q04656	ATP7A	Copper-transporting ATPase 1	Copper-transporting ATPase 1 OS=Homo sapiens GN=ATP7A PE=1 SV=3 - [ATP7A_HUMAN]	1500	163.3	1.071	1.382	1.921	1.944	1.647	2	2	2	2	2.7	2	24.3	2	26.7	2	6.2	2	23.6
Q5TC12	ATPAF1	ATP synthase mitochondrial F1 complex assembly factor 1	ATP synthase mitochondrial F1 complex assembly factor 1 OS=Homo sapiens GN=ATPAF1 PE=1 SV=1 - [ATPF1_HUMAN]	328	36.4	1.038	1.243	1.34	1.167	1.275	8	8	11	11	10.6	11	6.3	11	17.3	11	11	11	7.2
Q8N5M1	ATPAF2	ATP synthase mitochondrial F1 complex assembly factor 2	ATP synthase mitochondrial F1 complex assembly factor 2 OS=Homo sapiens GN=ATPAF2 PE=1 SV=1 - [ATPF2_HUMAN]	289	32.8	1.02	1.18	1.326	1.528	1.257	4	4	5	5	12.2	5	2.4	5	9.5	5	13.3	5	6.3
Q7L8W6	ATPBD4	Diphthine--ammonia ligase	Diphthine--ammonia ligase OS=Homo sapiens GN=DPH6 PE=1 SV=3 - [DPH6_HUMAN]	267	30.3	0.952	1.119	1.33	1.425	1.24	4	4	5	5	8.5	5	3.4	5	3.5	5	10.2	5	10.9
Q9UII2	ATPIF1	ATPase inhibitor, mitochondrial	ATPase inhibitor, mitochondrial OS=Homo sapiens GN=ATPIF1 PE=1 SV=1 - [ATIF1_HUMAN]	106	12.2	0.945	0.915	1.173	1.365	1.003	5	5	111	85	26.3	85	30.5	85	30	85	23.4	85	21.3
Q13535	ATR	Serine/threonine-protein kinase ATR	Serine/threonine-protein kinase ATR OS=Homo sapiens GN=ATR PE=1 SV=3 - [ATR_HUMAN]	2644	301.2	0.974	0.982	1.041	1.047	1.104	5	5	5	5	10.4	5	13	5	7.3	5	12.7	5	11.6
O75882	ATRN	Attractin	Attractin OS=Homo sapiens GN=ATRN PE=1 SV=2 - [ATRN_HUMAN]	1429	158.4	1.13	1.264	0.999	1.153	1.224	1	1	1	1	NaN	1	NaN	1	NaN	1	NaN	1	NaN
P46100	ATRX	Transcriptional regulator ATRX	Transcriptional regulator ATRX OS=Homo sapiens GN=ATRX PE=1 SV=5 - [ATRX_HUMAN]	2492	282.4	0.98	1.064	1.113	1.132	1.081	9	9	10	10	8.1	10	12	10	16.5	10	48.1	10	25.5
Q9UBB4	ATXN10	Ataxin-10	Ataxin-10 OS=Homo sapiens GN=ATXN10 PE=1 SV=1 - [ATX10_HUMAN]	475	53.5	0.989	0.934	0.793	0.693	0.838	23	23	52	52	4.8	52	7.4	52	6.4	52	7.9	52	8.7
H0YH87	ATXN2		Ataxin-2 (Fragment) OS=Homo sapiens GN=ATXN2 PE=4 SV=1 - [H0YH87_HUMAN]	916	98.1	0.989	1.017	0.876	0.886	0.98	18	19	26	25	8	25	9.6	25	11.5	25	9.6	25	11.9
Q8WWM7	ATXN2L	Ataxin-2-like protein	Ataxin-2-like protein OS=Homo sapiens GN=ATXN2L PE=1 SV=2 - [ATX2L_HUMAN]	1075	113.3	1.008	0.93	0.734	0.64	0.823	25	26	42	41	6.1	41	6.5	41	17.1	41	21.5	41	9.6
G3V3R7	ATXN3		Ataxin-3 (Fragment) OS=Homo sapiens GN=ATXN3 PE=2 SV=1 - [G3V3R7_HUMAN]	329	37.7	0.999	0.914	0.881	0.906	1.017	11	11	13	13	9.7	13	11	13	22.3	13	13.9	13	16.4
Q96GX2	ATXN7L3B	Putative ataxin-7-like protein 3B	Putative ataxin-7-like protein 3B OS=Homo sapiens GN=ATXN7L3B PE=3 SV=2 - [A7L3B_HUMAN]	97	10.8	0.9	1.263	0.966	0.952	1.455	2	2	3	3	1.1	3	10.1	3	1.6	3	0.6	3	2.3
Q13825	AUH	Methylglutaconyl-CoA hydratase, mitochondrial	Methylglutaconyl-CoA hydratase, mitochondrial OS=Homo sapiens GN=AUH PE=1 SV=1 - [AUHM_HUMAN]	339	35.6	0.978	0.995	1.056	1.034	1.009	2	2	2	2	10.9	2	0.9	2	1.6	2	4.2	2	0.5
Q9Y679	AUP1	Ancient ubiquitous protein 1	Ancient ubiquitous protein 1 OS=Homo sapiens GN=AUP1 PE=1 SV=1 - [AUP1_HUMAN]	476	53	0.966	1.09	1.04	1.118	0.979	6	6	12	12	19.1	12	12.8	12	12.9	12	13.3	12	13.8
O14965	AURKA	Aurora kinase A	Aurora kinase A OS=Homo sapiens GN=AURKA PE=1 SV=2 - [AURKA_HUMAN]	403	45.8	1.121	1.727	2.304	2.303	1.349	8	8	11	11	5.1	11	8.6	11	24.7	11	21.9	11	12.6
Q9NWT8	AURKAIP1	Aurora kinase A-interacting protein	Aurora kinase A-interacting protein OS=Homo sapiens GN=AURKAIP1 PE=1 SV=1 - [AKIP_HUMAN]	199	22.3	0.956	0.963	1.014	1.067	0.898	1	1	1	1	NaN	1	NaN	1	NaN	1	NaN	1	NaN
Q96GD4	AURKB	Aurora kinase B	Aurora kinase B OS=Homo sapiens GN=AURKB PE=1 SV=3 - [AURKB_HUMAN]	344	39.3	1.082	1.366	1.85	1.61	1.073	7	7	14	14	8.4	14	11.9	14	14.4	14	9.4	14	14.9
Q9NQS1	AVEN	Cell death regulator Aven	Cell death regulator Aven OS=Homo sapiens GN=AVEN PE=1 SV=1 - [AVEN_HUMAN]	362	38.5	0.94	0.839	0.85	0.725	0.925	5	5	6	6	10.4	6	25	6	8.4	6	12.9	6	3.4
Q8N6Z3	AVL9		AVL9 protein OS=Homo sapiens GN=AVL9 PE=2 SV=1 - [Q8N6Z3_HUMAN]	463	51.8	1.11	0.779	0.857	0.838	0.812	2	2	2	2	7.9	2	10.3	2	6.9	2	4.5	2	2
Q9UPN4	AZI1	5-azacytidine-induced protein 1	5-azacytidine-induced protein 1 OS=Homo sapiens GN=AZI1 PE=1 SV=3 - [AZI1_HUMAN]	1083	122.1	1.011	0.99	0.982	0.992	1.039	20	20	23	23	10	23	9.9	23	13.5	23	14.7	23	10.1
P61769	B2M	Beta-2-microglobulin;Beta-2-microglobulin form pI 5.3	Beta-2-microglobulin OS=Homo sapiens GN=B2M PE=1 SV=1 - [B2MG_HUMAN]	119	13.7	0.999	1.012	1.191	1.335	0.999	4	4	8	8	17.3	8	8	8	6.6	8	14.3	8	15.4
Q96L58	B3GALT6	Beta-1,3-galactosyltransferase 6	Beta-1,3-galactosyltransferase 6 OS=Homo sapiens GN=B3GALT6 PE=2 SV=2 - [B3GT6_HUMAN]	329	37.1	0.753	0.996	1.065	1.026	1.009	1	1	1	1	NaN	1	NaN	1	NaN	1	NaN	1	NaN
Q6Y288	B3GALTL	Beta-1,3-glucosyltransferase	Beta-1,3-glucosyltransferase OS=Homo sapiens GN=B3GALTL PE=1 SV=2 - [B3GLT_HUMAN]	498	56.5	0.976	2.569	2.968	2.674	2.283	1	1	1	1	NaN	1	NaN	1	NaN	1	NaN	1	NaN
B7ZAB3	B3GAT3		Galactosylgalactosylxylosylprotein 3-beta-glucuronosyltransferase 3 OS=Homo sapiens GN=B3GAT3 PE=2 SV=1 - [B7ZAB3_HUMAN]	315	34.6	0.993	1.012	1.191	1.109	0.862	1	1	1	1	NaN	1	NaN	1	NaN	1	NaN	1	NaN
O60512	B4GALT3	Beta-1,4-galactosyltransferase 3;Beta-N-acetylglucosaminyl-glycolipid beta-1,4-galactosyltransferase;Beta-N-acetylglucosaminylglycopeptide beta-1,4-galactosyltransferase;N-acetyllactosamine synthase	Beta-1,4-galactosyltransferase 3 OS=Homo sapiens GN=B4GALT3 PE=1 SV=2 - [B4GT3_HUMAN]	393	43.9	0.685	1.356	1.206	1.104	1.489	1	1	1	1	NaN	1	NaN	1	NaN	1	NaN	1	NaN
J3KQS6	BABAM1		BRISC and BRCA1-A complex member 1 OS=Homo sapiens GN=BABAM1 PE=4 SV=1 - [J3KQS6_HUMAN]	329	36.4	1.053	0.964	0.976	0.935	0.987	6	6	6	6	4.5	6	16.9	6	20.8	6	6.9	6	1.4
O14867	BACH1	Transcription regulator protein BACH1	Transcription regulator protein BACH1 OS=Homo sapiens GN=BACH1 PE=1 SV=2 - [BACH1_HUMAN]	736	81.9	0.955	0.883	1.022	0.911	0.946	2	2	2	2	8.2	2	32.3	2	24.5	2	38.5	2	48.4
F5GYS3	BAD		Bcl2 antagonist of cell death OS=Homo sapiens GN=BAD PE=2 SV=1 - [F5GYS3_HUMAN]	157	16.6	0.962	1.105	1.234	1.467	1.357	1	1	1	1	NaN	1	NaN	1	NaN	1	NaN	1	NaN
J3QTA2	BAG1		BAG family molecular chaperone regulator 1 OS=Homo sapiens GN=BAG1 PE=4 SV=1 - [J3QTA2_HUMAN]	345	38.7	0.996	1.022	1.036	1.025	1.172	5	5	6	6	4.6	6	9.3	6	8.4	6	7.7	6	19.5
O95816	BAG2	BAG family molecular chaperone regulator 2	BAG family molecular chaperone regulator 2 OS=Homo sapiens GN=BAG2 PE=1 SV=1 - [BAG2_HUMAN]	211	23.8	0.986	1.051	1.103	1.071	1.01	9	10	16	15	8.5	15	8.2	15	3.4	15	6.6	15	4.5
O95817	BAG3	BAG family molecular chaperone regulator 3	BAG family molecular chaperone regulator 3 OS=Homo sapiens GN=BAG3 PE=1 SV=3 - [BAG3_HUMAN]	575	61.6	1.116	1.049	1.033	1.09	1.046	7	7	8	8	8.6	8	9.8	8	17.5	8	22.8	8	7.9
O95429	BAG4	BAG family molecular chaperone regulator 4	BAG family molecular chaperone regulator 4 OS=Homo sapiens GN=BAG4 PE=1 SV=1 - [BAG4_HUMAN]	457	49.6	1.002	1.021	0.92	0.824	0.973	4	5	8	6	6.8	6	4	6	7	6	3.9	6	4.1
Q9UL15	BAG5	BAG family molecular chaperone regulator 5	BAG family molecular chaperone regulator 5 OS=Homo sapiens GN=BAG5 PE=1 SV=1 - [BAG5_HUMAN]	447	51.2	1.002	1.005	0.972	0.961	1.079	13	14	21	19	7.2	19	5.8	19	5.1	19	3.8	19	11
B0UX83	BAG6		HLA-B associated transcript 3, isoform CRA_a OS=Homo sapiens GN=BAG6 PE=2 SV=1 - [B0UX83_HUMAN]	1126	118.6	0.966	1.021	0.957	0.915	0.96	21	21	40	40	7.2	40	9.7	40	12.1	40	9.6	40	9.2
C0H5Y7	BAK1		BAK1 protein OS=Homo sapiens GN=BAK1 PE=2 SV=1 - [C0H5Y7_HUMAN]	153	16.9	0.905	1	1.015	1.119	0.923	1	1	1	1	NaN	1	NaN	1	NaN	1	NaN	1	NaN
O75531	BANF1	Barrier-to-autointegration factor	Barrier-to-autointegration factor OS=Homo sapiens GN=BANF1 PE=1 SV=1 - [BAF_HUMAN]	89	10.1	1.067	0.957	1.004	1.001	0.95	3	3	16	16	6.5	16	6.6	16	16	16	16.1	16	11.1
C9JYB6	BANP		Protein BANP (Fragment) OS=Homo sapiens GN=BANP PE=2 SV=1 - [C9JYB6_HUMAN]	95	10.7	0.895	0.999	0.815	0.832	1.034	1	1	1	1	NaN	1	NaN	1	NaN	1	NaN	1	NaN
Q92560	BAP1	Ubiquitin carboxyl-terminal hydrolase BAP1	Ubiquitin carboxyl-terminal hydrolase BAP1 OS=Homo sapiens GN=BAP1 PE=1 SV=2 - [BAP1_HUMAN]	729	80.3	0.976	0.843	0.891	0.96	0.915	3	3	3	3	13.2	3	19	3	6.1	3	12	3	12.3
Q8IXM2	BAP18	Chromatin complexes subunit BAP18	Chromatin complexes subunit BAP18 OS=Homo sapiens GN=BAP18 PE=1 SV=1 - [BAP18_HUMAN]	172	17.9	1.031	1.009	0.971	0.902	1.093	8	8	17	17	9.4	17	5.5	17	5.4	17	7.1	17	4.9
E7EUI3	BARD1		BRCA1-associated RING domain protein 1 OS=Homo sapiens GN=BARD1 PE=2 SV=1 - [E7EUI3_HUMAN]	567	62.1	0.9	1.036	1.113	0.859	1.109	2	2	2	2	0.7	2	7.1	2	20.8	2	21.4	2	1
Q07812	BAX	Apoptosis regulator BAX	Apoptosis regulator BAX OS=Homo sapiens GN=BAX PE=1 SV=1 - [BAX_HUMAN]	192	21.2	0.998	1.063	1.158	1.197	1.228	6	6	14	14	11.4	14	16.4	14	5.9	14	13.5	14	12.1
Q9NRL2	BAZ1A	Bromodomain adjacent to zinc finger domain protein 1A	Bromodomain adjacent to zinc finger domain protein 1A OS=Homo sapiens GN=BAZ1A PE=1 SV=2 - [BAZ1A_HUMAN]	1556	178.6	0.909	1.213	1.122	1.037	1.233	27	27	36	35	6.3	35	9.4	35	8.4	35	8.5	35	14
Q9UIG0	BAZ1B	Tyrosine-protein kinase BAZ1B	Tyrosine-protein kinase BAZ1B OS=Homo sapiens GN=BAZ1B PE=1 SV=2 - [BAZ1B_HUMAN]	1483	170.8	0.907	0.843	0.755	0.661	0.982	43	43	64	64	5.7	64	12.8	64	12.3	64	11.1	64	13.3
J3QK86	BAZ2A		Bromodomain adjacent to zinc finger domain protein 2A OS=Homo sapiens GN=BAZ2A PE=4 SV=1 - [J3QK86_HUMAN]	1873	207.7	0.998	0.939	1.149	1.224	0.932	5	5	5	5	11.6	5	2.2	5	15.1	5	9.8	5	3.3
C9J8D0	BBX		HMG box transcription factor BBX (Fragment) OS=Homo sapiens GN=BBX PE=2 SV=1 - [C9J8D0_HUMAN]	448	50.6	0.193	0.222	0.483	0.499	0.305	1	1	1	1	NaN	1	NaN	1	NaN	1	NaN	1	NaN
C9JTE9	BCAP29		B-cell receptor-associated protein 29 (Fragment) OS=Homo sapiens GN=BCAP29 PE=2 SV=1 - [C9JTE9_HUMAN]	230	26.9	1.015	1.295	1.509	1.703	1.422	4	4	8	8	2.5	8	5.7	8	7.8	8	6.2	8	2.9
P51572	BCAP31	B-cell receptor-associated protein 31	B-cell receptor-associated protein 31 OS=Homo sapiens GN=BCAP31 PE=1 SV=3 - [BAP31_HUMAN]	246	28	1.028	0.968	1.016	1.072	0.941	10	10	21	21	7.4	21	8.2	21	11.4	21	9.9	21	8.5
O75934	BCAS2	Pre-mRNA-splicing factor SPF27	Pre-mRNA-splicing factor SPF27 OS=Homo sapiens GN=BCAS2 PE=1 SV=1 - [SPF27_HUMAN]	225	26.1	1.043	0.955	0.9	0.862	0.93	11	11	28	28	8.2	28	7.5	28	15.3	28	9.2	28	10.7
Q9H6U6	BCAS3	Breast carcinoma-amplified sequence 3	Breast carcinoma-amplified sequence 3 OS=Homo sapiens GN=BCAS3 PE=1 SV=3 - [BCAS3_HUMAN]	928	101.2	0.971	1.002	1.148	1.164	1.127	3	3	4	4	4.6	4	5.4	4	4.5	4	3	4	10.6
P54687	BCAT1	Branched-chain-amino-acid aminotransferase, cytosolic	Branched-chain-amino-acid aminotransferase, cytosolic OS=Homo sapiens GN=BCAT1 PE=1 SV=3 - [BCAT1_HUMAN]	386	42.9	1.032	0.981	1.031	0.935	1.004	8	8	26	26	6.8	26	4.9	26	8.1	26	7.2	26	4.8
O15382	BCAT2	Branched-chain-amino-acid aminotransferase, mitochondrial	Branched-chain-amino-acid aminotransferase, mitochondrial OS=Homo sapiens GN=BCAT2 PE=1 SV=2 - [BCAT2_HUMAN]	392	44.3	0.997	0.909	0.902	0.906	0.755	11	11	22	22	7.6	22	7.2	22	8.3	22	7.9	22	11.2
Q9P287	BCCIP	BRCA2 and CDKN1A-interacting protein	BRCA2 and CDKN1A-interacting protein OS=Homo sapiens GN=BCCIP PE=1 SV=1 - [BCCIP_HUMAN]	314	36	0.995	0.988	0.834	0.813	0.77	5	10	23	10	6.4	10	13.3	10	11.5	10	11.7	10	13.1
B4E318	BCCIP	BRCA2 and CDKN1A-interacting protein	BRCA2 and CDKN1A-interacting protein OS=Homo sapiens GN=BCCIP PE=2 SV=1 - [B4E318_HUMAN]	262	29.8	1.296	1.398	0.877	1.191	1.328	1	6	14	1	NaN	1	NaN	1	NaN	1	NaN	1	NaN
P06276	BCHE	Cholinesterase	Cholinesterase OS=Homo sapiens GN=BCHE PE=1 SV=1 - [CHLE_HUMAN]	602	68.4	0.959	1.401	1.624	1.202	1.383	4	4	5	5	7.5	5	9	5	23.1	5	6.7	5	9.4
P12694	BCKDHA	2-oxoisovalerate dehydrogenase subunit alpha, mitochondrial	2-oxoisovalerate dehydrogenase subunit alpha, mitochondrial OS=Homo sapiens GN=BCKDHA PE=1 SV=2 - [ODBA_HUMAN]	445	50.4	1.044	0.915	0.998	1.043	0.875	11	12	22	21	8.6	21	9	21	7	21	6.1	21	16.5
P21953	BCKDHB	2-oxoisovalerate dehydrogenase subunit beta, mitochondrial	2-oxoisovalerate dehydrogenase subunit beta, mitochondrial OS=Homo sapiens GN=BCKDHB PE=1 SV=2 - [ODBB_HUMAN]	392	43.1	1.046	0.96	1.006	1.072	0.866	8	8	12	12	9.3	12	7.1	12	9.8	12	9.2	12	11.5
Q96G95	BCKDK		BCKDK protein OS=Homo sapiens GN=BCKDK PE=2 SV=1 - [Q96G95_HUMAN]	335	37.7	1.055	0.937	0.988	0.919	0.734	4	4	4	4	7.3	4	4.8	4	4.5	4	5.9	4	6.7
O95999	BCL10	B-cell lymphoma/leukemia 10	B-cell lymphoma/leukemia 10 OS=Homo sapiens GN=BCL10 PE=1 SV=1 - [BCL10_HUMAN]	233	26.2	1.031	1.051	1.164	1.165	1.067	5	5	6	6	4.7	6	13.7	6	1.4	6	13.2	6	11.6
F5H2Y4	BCL11A		B-cell lymphoma/leukemia 11A OS=Homo sapiens GN=BCL11A PE=2 SV=1 - [F5H2Y4_HUMAN]	793	86.3	0.998	1.521	1.334	1.238	1.096	1	3	5	1	NaN	1	NaN	1	NaN	1	NaN	1	NaN
Q9C0K0	BCL11B	B-cell lymphoma/leukemia 11B	B-cell lymphoma/leukemia 11B OS=Homo sapiens GN=BCL11B PE=1 SV=1 - [BC11B_HUMAN]	894	95.5	0.962	0.904	0.71	0.599	1.003	12	14	22	18	12.5	18	9.7	18	13.6	18	24.1	18	11.5
Q5QP56	BCL2L1		Bcl-2-like protein 1 (Fragment) OS=Homo sapiens GN=BCL2L1 PE=2 SV=1 - [Q5QP56_HUMAN]	181	20.2	1.081	1.026	1.217	1.232	1.208	2	2	4	4	9.1	4	18.6	4	21.9	4	30.5	4	17.4
O43521	BCL2L11	Bcl-2-like protein 11	Bcl-2-like protein 11 OS=Homo sapiens GN=BCL2L11 PE=1 SV=1 - [B2L11_HUMAN]	198	22.2	0.991	1.178	1.008	1.011	0.986	1	1	1	1	NaN	1	NaN	1	NaN	1	NaN	1	NaN
M0QZM6	BCL2L12		Bcl-2-like protein 12 (Fragment) OS=Homo sapiens GN=BCL2L12 PE=4 SV=1 - [M0QZM6_HUMAN]	164	17.9	0.861	0.954	1.452	1.401	1.033	1	1	1	1	NaN	1	NaN	1	NaN	1	NaN	1	NaN
Q9BXK5	BCL2L13	Bcl-2-like protein 13	Bcl-2-like protein 13 OS=Homo sapiens GN=BCL2L13 PE=1 SV=1 - [B2L13_HUMAN]	485	52.7	0.963	1.157	1.101	1.097	1.07	10	10	18	18	8	18	8.8	18	15.9	18	17.6	18	10.4
Q4VC05	BCL7A	B-cell CLL/lymphoma 7 protein family member A	B-cell CLL/lymphoma 7 protein family member A OS=Homo sapiens GN=BCL7A PE=1 SV=1 - [BCL7A_HUMAN]	210	22.8	1.013	1.06	1.032	0.925	1.106	5	6	12	9	7.1	9	12	9	14.3	9	8.7	9	21.1
Q9BQE9	BCL7B	B-cell CLL/lymphoma 7 protein family member B	B-cell CLL/lymphoma 7 protein family member B OS=Homo sapiens GN=BCL7B PE=1 SV=1 - [BCL7B_HUMAN]	202	22.2	0.936	1.024	0.94	0.855	1.103	3	4	5	4	2.5	4	8.3	4	28.2	4	10.8	4	14
Q9NYF8	BCLAF1	Bcl-2-associated transcription factor 1	Bcl-2-associated transcription factor 1 OS=Homo sapiens GN=BCLAF1 PE=1 SV=2 - [BCLF1_HUMAN]	920	106.1	1.051	0.994	0.942	0.827	0.941	21	22	33	30	8.1	30	8.9	30	16.3	29	12.9	30	11.4
H7C231	BCOR		BCL-6 corepressor (Fragment) OS=Homo sapiens GN=BCOR PE=4 SV=1 - [H7C231_HUMAN]	289	32.5	0.33	0.305	0.383	0.347	0.388	1	1	1	1	NaN	1	NaN	1	NaN	1	NaN	1	NaN
P11274	BCR	Breakpoint cluster region protein	Breakpoint cluster region protein OS=Homo sapiens GN=BCR PE=1 SV=2 - [BCR_HUMAN]	1271	142.7	0.989	1.107	1.121	1.149	1.449	15	16	23	22	8.6	22	13.3	22	13.5	22	17	22	18.2
Q9Y276	BCS1L	Mitochondrial chaperone BCS1	Mitochondrial chaperone BCS1 OS=Homo sapiens GN=BCS1L PE=1 SV=1 - [BCS1_HUMAN]	419	47.5	1.06	1.024	1.036	0.946	0.925	6	6	7	7	16.4	7	11.5	7	2.7	7	12.7	7	19.4
E9PCG9	BDH1		D-beta-hydroxybutyrate dehydrogenase, mitochondrial OS=Homo sapiens GN=BDH1 PE=2 SV=1 - [E9PCG9_HUMAN]	256	29	1.043	0.883	0.966	0.92	0.792	8	8	21	21	10.5	21	10.8	21	12.1	21	22.8	21	10.3
Q9BUT1	BDH2	3-hydroxybutyrate dehydrogenase type 2	3-hydroxybutyrate dehydrogenase type 2 OS=Homo sapiens GN=BDH2 PE=1 SV=2 - [BDH2_HUMAN]	245	26.7	1.021	1.051	1.281	1.363	1.272	5	6	12	11	5.2	11	8.7	11	13.8	11	8.7	11	10
Q14457	BECN1	Beclin-1	Beclin-1 OS=Homo sapiens GN=BECN1 PE=1 SV=2 - [BECN1_HUMAN]	450	51.9	0.991	0.959	0.977	1.01	0.974	8	8	8	8	11.2	8	10.4	8	13.2	8	12.5	8	7.4
Q5T5X7	BEND3	BEN domain-containing protein 3	BEN domain-containing protein 3 OS=Homo sapiens GN=BEND3 PE=1 SV=1 - [BEND3_HUMAN]	828	94.4	1.006	1.074	0.968	0.867	1.148	8	8	10	10	5.1	10	15.8	10	8.5	10	9.6	10	11
Q7L4P6	BEND5	BEN domain-containing protein 5	BEN domain-containing protein 5 OS=Homo sapiens GN=BEND5 PE=1 SV=1 - [BEND5_HUMAN]	421	48.2	1.036	0.869	0.846	0.816	0.885	1	1	1	1	NaN	1	NaN	1	NaN	1	NaN	1	NaN
O15155	BET1	BET1 homolog	BET1 homolog OS=Homo sapiens GN=BET1 PE=1 SV=1 - [BET1_HUMAN]	118	13.3	1.003	1.151	1.201	1.208	0.989	1	1	4	4	7.2	4	3.2	4	4.3	4	6.6	4	4.3
E9PQJ6	BET1L		BET1-like protein OS=Homo sapiens GN=BET1L PE=2 SV=1 - [E9PQJ6_HUMAN]	88	9.8	0.894	0.984	0.729	0.723	0.735	2	2	2	2	9.2	2	2.1	2	6.3	2	2.4	2	21.1
B4DUT0	BFAR		Bifunctional apoptosis regulator OS=Homo sapiens GN=BFAR PE=2 SV=1 - [B4DUT0_HUMAN]	322	38.6	0.785	1.001	0.771	0.785	0.93	1	1	1	1	NaN	1	NaN	1	NaN	1	NaN	1	NaN
A8MVZ6	BICD1		BICD1 protein OS=Homo sapiens GN=BICD1 PE=2 SV=3 - [A8MVZ6_HUMAN]	827	94.8	0.894	1.559	1.285	1.287	1.693	1	3	3	1	NaN	1	NaN	1	NaN	1	NaN	1	NaN
Q8TD16	BICD2	Protein bicaudal D homolog 2	Protein bicaudal D homolog 2 OS=Homo sapiens GN=BICD2 PE=1 SV=1 - [BICD2_HUMAN]	824	93.5	0.948	1.04	1.104	1.029	1.083	12	14	15	13	7.7	13	11.9	13	9.8	13	7.6	13	8.6
P55957	BID	BH3-interacting domain death agonist;BH3-interacting domain death agonist p11;BH3-interacting domain death agonist p13;BH3-interacting domain death agonist p15	BH3-interacting domain death agonist OS=Homo sapiens GN=BID PE=1 SV=1 - [BID_HUMAN]	195	22	1.028	1.081	1.011	1.064	1.091	5	5	13	13	6.7	13	14.4	13	14.1	13	14.3	13	13.9
O00499	BIN1	Myc box-dependent-interacting protein 1	Myc box-dependent-interacting protein 1 OS=Homo sapiens GN=BIN1 PE=1 SV=1 - [BIN1_HUMAN]	593	64.7	1.015	0.997	1.102	1.18	1.118	13	13	22	22	9.3	22	13.1	22	11.3	22	17.2	22	7.5
Q9UBW5	BIN2	Bridging integrator 2	Bridging integrator 2 OS=Homo sapiens GN=BIN2 PE=1 SV=3 - [BIN2_HUMAN]	565	61.8	0.909	0.792	1.015	1.404	1.168	12	12	20	18	8.5	18	11.3	18	7.4	18	15.1	18	11.5
E9PI77	BIRC2		Baculoviral IAP repeat-containing protein 2 (Fragment) OS=Homo sapiens GN=BIRC2 PE=2 SV=1 - [E9PI77_HUMAN]	139	15.8	0.962	0.908	1.062	0.877	0.996	1	1	1	1	NaN	1	NaN	1	NaN	1	NaN	1	NaN
O15392	BIRC5	Baculoviral IAP repeat-containing protein 5	Baculoviral IAP repeat-containing protein 5 OS=Homo sapiens GN=BIRC5 PE=1 SV=3 - [BIRC5_HUMAN]	142	16.4	1.207	1.14	1.852	1.735	1.027	3	3	6	6	4.7	6	7.8	6	2.8	6	13.5	6	9.7
Q9NR09	BIRC6	Baculoviral IAP repeat-containing protein 6	Baculoviral IAP repeat-containing protein 6 OS=Homo sapiens GN=BIRC6 PE=1 SV=2 - [BIRC6_HUMAN]	4857	529.9	1.049	1.014	1.066	1.092	1.08	21	21	26	26	14.7	26	11.6	26	13.8	26	12.6	26	12.9
Q6ICH2	bK150C2.9		BK150C2.9 protein OS=Homo sapiens GN=bK150C2.9 PE=2 SV=1 - [Q6ICH2_HUMAN]	202	24.1	0.895	0.396	0.048	0.038	0.502	1	2	3	1	NaN	1	NaN	1	NaN	1	NaN	1	NaN
H0YNU5	BLM		Bloom syndrome protein OS=Homo sapiens GN=BLM PE=2 SV=1 - [H0YNU5_HUMAN]	1286	144.4	0.969	0.996	0.898	0.995	1.07	3	4	4	3	16.2	3	8.8	3	35.9	3	63.1	3	16.4
Q13867	BLMH	Bleomycin hydrolase	Bleomycin hydrolase OS=Homo sapiens GN=BLMH PE=1 SV=1 - [BLMH_HUMAN]	455	52.5	1.028	0.924	0.995	0.974	0.917	13	13	25	25	7.4	25	7.2	25	9.4	25	7.2	25	8
G8JLQ3	BLOC1S1		Biogenesis of lysosome-related organelles complex 1 subunit 1 OS=Homo sapiens GN=BLOC1S1 PE=2 SV=1 - [G8JLQ3_HUMAN]	75	8.6	1.074	0.961	1.128	1.309	1.183	2	2	3	3	8.3	3	3.6	3	9.4	3	13.6	3	5.8
Q6QNY1	BLOC1S2	Biogenesis of lysosome-related organelles complex 1 subunit 2	Biogenesis of lysosome-related organelles complex 1 subunit 2 OS=Homo sapiens GN=BLOC1S2 PE=1 SV=1 - [BL1S2_HUMAN]	142	16	0.934	1.135	1.392	1.468	1.241	1	1	1	1	NaN	1	NaN	1	NaN	1	NaN	1	NaN
Q9NUP1	BLOC1S4	Biogenesis of lysosome-related organelles complex 1 subunit 4	Biogenesis of lysosome-related organelles complex 1 subunit 4 OS=Homo sapiens GN=BLOC1S4 PE=1 SV=1 - [BL1S4_HUMAN]	217	23.3	1.139	0.942	1.046	1.102	0.905	1	1	1	1	NaN	1	NaN	1	NaN	1	NaN	1	NaN
Q8TDH9	BLOC1S5	Biogenesis of lysosome-related organelles complex 1 subunit 5	Biogenesis of lysosome-related organelles complex 1 subunit 5 OS=Homo sapiens GN=BLOC1S5 PE=1 SV=1 - [BL1S5_HUMAN]	187	21.6	0.922	0.912	1.032	1.026	0.972	1	1	2	2	13.6	2	5.9	2	11.3	2	1.5	2	22.2
P53004	BLVRA	Biliverdin reductase A	Biliverdin reductase A OS=Homo sapiens GN=BLVRA PE=1 SV=2 - [BIEA_HUMAN]	296	33.4	1.063	1.039	1.187	1.304	1.159	8	8	27	23	13.4	23	20.9	23	9.9	23	17.2	23	12.6
R4GMX3	BMI1		Polycomb complex protein BMI-1 OS=Homo sapiens GN=BMI1 PE=4 SV=1 - [R4GMX3_HUMAN]	469	53.3	1.073	1.062	1.03	1.078	1.18	4	7	9	4	6.6	4	13.6	4	11.2	4	7.1	4	19
Q9NSY1	BMP2K	BMP-2-inducible protein kinase	BMP-2-inducible protein kinase OS=Homo sapiens GN=BMP2K PE=1 SV=2 - [BMP2K_HUMAN]	1161	129.1	0.913	0.913	0.878	0.905	0.871	13	13	15	15	8.8	15	8.7	15	11	15	12.8	15	12.7
Q14692	BMS1	Ribosome biogenesis protein BMS1 homolog	Ribosome biogenesis protein BMS1 homolog OS=Homo sapiens GN=BMS1 PE=1 SV=1 - [BMS1_HUMAN]	1282	145.7	0.919	0.823	0.678	0.554	0.783	14	14	18	18	5	18	16.4	18	14.7	18	13.6	18	17.4
P51813	BMX	Cytoplasmic tyrosine-protein kinase BMX	Cytoplasmic tyrosine-protein kinase BMX OS=Homo sapiens GN=BMX PE=1 SV=1 - [BMX_HUMAN]	675	78	1.191	0.745	0.735	0.563	0.812	1	1	2	2	33.5	2	26.6	2	0	2	9.1	2	14.8
Q12981	BNIP1	Vesicle transport protein SEC20	Vesicle transport protein SEC20 OS=Homo sapiens GN=BNIP1 PE=1 SV=3 - [SEC20_HUMAN]	228	26.1	1.068	1.038	0.957	0.998	0.818	12	12	16	16	9.4	16	9.2	16	14.8	16	12.9	16	12.6
J3KN59	BNIP2		BCL2/adenovirus E1B 19 kDa protein-interacting protein 2 OS=Homo sapiens GN=BNIP2 PE=4 SV=1 - [J3KN59_HUMAN]	435	48.8	0.862	1.022	0.723	0.55	0.953	2	2	2	2	1.7	2	8.1	2	25	2	89.3	2	0.3
Q8NFC6	BOD1L1	Biorientation of chromosomes in cell division protein 1-like 1	Biorientation of chromosomes in cell division protein 1-like 1 OS=Homo sapiens GN=BOD1L1 PE=1 SV=2 - [BD1L1_HUMAN]	3051	330.3	0.982	1.079	1.082	1.052	1.142	23	24	26	25	8.4	25	11.9	25	12.6	25	9.8	25	10.3
Q9Y3E2	BOLA1	BolA-like protein 1	BolA-like protein 1 OS=Homo sapiens GN=BOLA1 PE=1 SV=1 - [BOLA1_HUMAN]	137	14.3	1.004	1.03	0.8	0.63	1.03	2	2	2	2	3	2	6	2	9.4	2	10.9	2	6.5
Q9H3K6	BOLA2	BolA-like protein 2	BolA-like protein 2 OS=Homo sapiens GN=BOLA2 PE=1 SV=1 - [BOLA2_HUMAN]	86	10.1	0.973	0.979	0.887	0.916	1.002	4	4	11	11	10	11	7	11	6.1	11	6.1	11	3.5
Q53S33	BOLA3	BolA-like protein 3	BolA-like protein 3 OS=Homo sapiens GN=BOLA3 PE=1 SV=1 - [BOLA3_HUMAN]	107	12.1	1.024	1.004	0.914	1.155	1.125	4	4	6	6	10.8	6	3.4	6	12.8	6	12.3	6	7.1
Q14137	BOP1	Ribosome biogenesis protein BOP1	Ribosome biogenesis protein BOP1 OS=Homo sapiens GN=BOP1 PE=1 SV=2 - [BOP1_HUMAN]	746	83.6	0.924	0.942	0.797	0.709	0.829	19	19	36	34	7.8	36	10.2	36	10.8	36	13	36	9.5
P07738	BPGM	Bisphosphoglycerate mutase	Bisphosphoglycerate mutase OS=Homo sapiens GN=BPGM PE=1 SV=2 - [PMGE_HUMAN]	259	30	1.092	1.113	1.313	1.509	1.248	2	2	2	2	17	2	0.3	2	15.1	2	12.7	2	16.5
Q86WA6	BPHL	Valacyclovir hydrolase	Valacyclovir hydrolase OS=Homo sapiens GN=BPHL PE=1 SV=1 - [BPHL_HUMAN]	291	32.5	1.004	1	1.091	1.313	1.146	3	3	3	3	3.1	3	0.3	3	13.7	3	2.1	3	3.1
O95861	BPNT1	3'(2'),5'-bisphosphate nucleotidase 1	3'(2'),5'-bisphosphate nucleotidase 1 OS=Homo sapiens GN=BPNT1 PE=1 SV=1 - [BPNT1_HUMAN]	308	33.4	1.024	1.016	1.134	1.254	1.071	10	10	22	22	5.4	22	6.1	22	7.7	22	11.5	22	10.4
E7ETD6	BPTF		Nucleosome-remodeling factor subunit BPTF OS=Homo sapiens GN=BPTF PE=4 SV=3 - [E7ETD6_HUMAN]	2764	307.9	1.008	1.004	0.775	0.711	1.012	12	12	15	15	6.6	15	13.2	15	7.1	15	10.8	15	17.7
P15056	BRAF	Serine/threonine-protein kinase B-raf	Serine/threonine-protein kinase B-raf OS=Homo sapiens GN=BRAF PE=1 SV=4 - [BRAF_HUMAN]	766	84.4	1.08	1.328	1.289	1.198	1.181	1	5	6	1	NaN	1	NaN	1	NaN	1	NaN	1	NaN
J3KNN7	BRAP		BRCA1-associated protein OS=Homo sapiens GN=BRAP PE=4 SV=1 - [J3KNN7_HUMAN]	562	64.2	0.945	1.019	0.952	0.929	1.014	10	10	13	12	16.3	12	10.9	12	12.4	12	11.8	12	3.5
Q6PJG6	BRAT1	BRCA1-associated ATM activator 1	BRCA1-associated ATM activator 1 OS=Homo sapiens GN=BRAT1 PE=1 SV=2 - [BRAT1_HUMAN]	821	88.1	0.938	1.288	1.154	1.076	1.145	3	4	5	4	2.5	4	15.4	4	11.9	4	5.4	4	5.7
E9PC22	BRCA1		Breast cancer type 1 susceptibility protein OS=Homo sapiens GN=BRCA1 PE=2 SV=1 - [E9PC22_HUMAN]	59	6.7	1.092	1.12	1.126	0.983	1.097	3	3	5	5	20.4	5	3.9	5	8.2	5	17.1	5	4.1
E9PIQ1	BRCA2		Breast cancer type 2 susceptibility protein (Fragment) OS=Homo sapiens GN=BRCA2 PE=2 SV=2 - [E9PIQ1_HUMAN]	481	53.3	0.981	0.896	0.985	1.069	0.947	1	1	1	1	NaN	1	NaN	1	NaN	1	NaN	1	NaN
P46736	BRCC3	Lys-63-specific deubiquitinase BRCC36	Lys-63-specific deubiquitinase BRCC36 OS=Homo sapiens GN=BRCC3 PE=1 SV=2 - [BRCC3_HUMAN]	316	36	1.018	0.932	1.035	1.115	0.975	6	6	7	7	11	7	10	7	11.5	7	18	7	3.1
O95696	BRD1	Bromodomain-containing protein 1	Bromodomain-containing protein 1 OS=Homo sapiens GN=BRD1 PE=1 SV=1 - [BRD1_HUMAN]	1058	119.4	0.96	0.933	0.878	0.853	1.028	8	9	10	9	12	9	3.5	9	9.6	9	2.6	9	7.8
P25440	BRD2	Bromodomain-containing protein 2	Bromodomain-containing protein 2 OS=Homo sapiens GN=BRD2 PE=1 SV=2 - [BRD2_HUMAN]	801	88	1.034	0.869	0.776	0.742	0.841	10	11	14	12	10.7	12	3.3	12	8.9	12	6.5	12	10.9
Q15059	BRD3	Bromodomain-containing protein 3	Bromodomain-containing protein 3 OS=Homo sapiens GN=BRD3 PE=1 SV=1 - [BRD3_HUMAN]	726	79.5	1.045	0.917	0.977	1.094	0.997	9	12	19	12	4.8	12	6.4	12	12.3	12	9.1	12	3.5
O60885	BRD4	Bromodomain-containing protein 4	Bromodomain-containing protein 4 OS=Homo sapiens GN=BRD4 PE=1 SV=2 - [BRD4_HUMAN]	1362	152.1	1.032	0.925	0.99	1.071	0.911	15	18	26	19	3.2	19	6.4	19	8.3	19	7.3	19	6.8
Q9NPI1	BRD7	Bromodomain-containing protein 7	Bromodomain-containing protein 7 OS=Homo sapiens GN=BRD7 PE=1 SV=1 - [BRD7_HUMAN]	651	74.1	0.944	1	0.987	0.946	1	7	7	8	8	7.9	8	6.7	8	5.1	8	7.8	8	10.2
F8W820	BRD8		Bromodomain-containing protein 8 OS=Homo sapiens GN=BRD8 PE=2 SV=1 - [F8W820_HUMAN]	837	91.1	1.221	1.008	1.245	1.08	1.164	1	8	10	2	2.2	2	28.4	2	5.2	2	2.7	2	22.2
H7C128	BRD8		Bromodomain-containing protein 8 (Fragment) OS=Homo sapiens GN=BRD8 PE=4 SV=1 - [H7C128_HUMAN]	857	93.3	1.112	1.084	0.647	0.577	0.799	1	8	9	1	NaN	1	NaN	1	NaN	1	NaN	1	NaN
Q9H8M2	BRD9	Bromodomain-containing protein 9	Bromodomain-containing protein 9 OS=Homo sapiens GN=BRD9 PE=1 SV=2 - [BRD9_HUMAN]	597	67	0.745	1.021	0.809	0.813	1.072	1	1	1	1	NaN	1	NaN	1	NaN	1	NaN	1	NaN
Q9NXR7	BRE	BRCA1-A complex subunit BRE	BRCA1-A complex subunit BRE OS=Homo sapiens GN=BRE PE=1 SV=2 - [BRE_HUMAN]	383	43.5	1.029	1.056	1.059	1.125	1.011	4	4	6	6	3.1	6	16.9	6	10.8	6	10.3	6	2.8
Q92994	BRF1	Transcription factor IIIB 90 kDa subunit	Transcription factor IIIB 90 kDa subunit OS=Homo sapiens GN=BRF1 PE=1 SV=1 - [TF3B_HUMAN]	677	73.8	0.932	0.995	0.924	1.107	1.182	6	6	10	10	15.8	10	11.4	10	28.4	10	19.2	10	8.1
Q8WY22	BRI3BP	BRI3-binding protein	BRI3-binding protein OS=Homo sapiens GN=BRI3BP PE=1 SV=1 - [BRI3B_HUMAN]	251	27.8	0.983	1.031	1.018	1.041	0.964	3	3	7	7	7.3	7	4.2	7	3.4	7	3.8	7	4
J3QSE8	BRIP1		39S ribosomal protein L36, mitochondrial OS=Homo sapiens GN=BRIP1 PE=4 SV=1 - [J3QSE8_HUMAN]	994	112.4	0.858	0.76	0.767	0.687	0.837	1	1	1	1	NaN	1	NaN	1	NaN	1	NaN	1	NaN
Q8TDN6	BRIX1	Ribosome biogenesis protein BRX1 homolog	Ribosome biogenesis protein BRX1 homolog OS=Homo sapiens GN=BRIX1 PE=1 SV=2 - [BRX1_HUMAN]	353	41.4	0.959	1.055	0.914	0.82	0.964	11	11	18	18	7.6	18	17.2	18	19.9	18	14.8	18	12.3
Q8WUW1	BRK1	Protein BRICK1	Protein BRICK1 OS=Homo sapiens GN=BRK1 PE=1 SV=1 - [BRK1_HUMAN]	75	8.7	1.018	0.915	1.056	0.895	0.957	5	5	13	13	5.2	13	14.8	13	11.2	13	19.5	13	8.3
E9PJF5	BRMS1		Breast cancer metastasis-suppressor 1 (Fragment) OS=Homo sapiens GN=BRMS1 PE=2 SV=1 - [E9PJF5_HUMAN]	244	28.3	0.974	1.159	0.879	1.016	0.95	5	5	9	9	16.9	9	31.5	9	22.2	9	23.1	9	35.5
H0YHD0	BRMS1L		Breast cancer metastasis-suppressor 1-like protein (Fragment) OS=Homo sapiens GN=BRMS1L PE=4 SV=1 - [H0YHD0_HUMAN]	215	25.1	1.04	1.008	1.224	1.059	1.224	1	1	2	2	4.8	2	19.3	2	3.1	2	16.9	2	13.4
Q5VW32	BROX	BRO1 domain-containing protein BROX	BRO1 domain-containing protein BROX OS=Homo sapiens GN=BROX PE=1 SV=1 - [BROX_HUMAN]	411	46.4	1.011	1.045	1.002	0.979	1.197	4	4	7	7	9.6	7	7.7	7	7.3	7	9.3	7	8.8
P55201	BRPF1	Peregrin	Peregrin OS=Homo sapiens GN=BRPF1 PE=1 SV=2 - [BRPF1_HUMAN]	1214	137.4	0.976	0.953	0.825	0.86	0.948	7	8	9	8	8.5	8	5.9	8	3.3	8	11.4	8	6.3
Q9NW68	BSDC1	BSD domain-containing protein 1	BSD domain-containing protein 1 OS=Homo sapiens GN=BSDC1 PE=1 SV=1 - [BSDC1_HUMAN]	430	47.1	0.99	0.987	0.883	0.836	0.883	7	7	8	8	19.1	8	12.2	8	13.5	8	24.8	8	22.6
P35613	BSG	Basigin	Basigin OS=Homo sapiens GN=BSG PE=1 SV=2 - [BASI_HUMAN]	385	42.2	1.042	0.992	0.971	0.941	1.067	6	6	24	24	11.6	24	15.4	24	17.9	24	11	24	11.1
Q10589	BST2	Bone marrow stromal antigen 2	Bone marrow stromal antigen 2 OS=Homo sapiens GN=BST2 PE=1 SV=1 - [BST2_HUMAN]	180	19.8	0.909	1.112	0.481	0.549	0.863	1	1	1	1	NaN	1	NaN	1	NaN	1	NaN	1	NaN
O14981	BTAF1	TATA-binding protein-associated factor 172	TATA-binding protein-associated factor 172 OS=Homo sapiens GN=BTAF1 PE=1 SV=2 - [BTAF1_HUMAN]	1849	206.8	0.946	1.069	1.073	1.088	1.089	11	11	14	14	22.7	14	6.2	14	3	14	8.9	14	14
B7Z503	BTBD10		BTB (POZ) domain containing 10, isoform CRA_c OS=Homo sapiens GN=BTBD10 PE=2 SV=1 - [B7Z503_HUMAN]	427	48.3	0.931	0.991	0.782	0.853	0.926	1	1	1	1	NaN	1	NaN	1	NaN	1	NaN	1	NaN
Q9BX70	BTBD2	BTB/POZ domain-containing protein 2	BTB/POZ domain-containing protein 2 OS=Homo sapiens GN=BTBD2 PE=1 SV=1 - [BTBD2_HUMAN]	525	55.9	0.671	0.861	0.736	0.744	0.934	2	2	2	2	10.5	2	0.4	2	10.4	2	10.6	2	4.5
P20290	BTF3	Transcription factor BTF3	Transcription factor BTF3 OS=Homo sapiens GN=BTF3 PE=1 SV=1 - [BTF3_HUMAN]	206	22.2	0.863	1.127	0.898	0.712	0.885	4	8	24	16	9.8	16	9.1	16	14.7	16	9.6	16	16.6
D6RDG3	BTF3		Butyrophilin subfamily 3 member A3 (Fragment) OS=Homo sapiens GN=BTF3 PE=2 SV=2 - [D6RDG3_HUMAN]	110	11.9	0.923	0.885	0.554	0.518	0.823	1	4	9	5	3.5	5	0.4	5	4.5	5	7.2	5	4.1
Q96K17	BTF3L4	Transcription factor BTF3 homolog 4	Transcription factor BTF3 homolog 4 OS=Homo sapiens GN=BTF3L4 PE=1 SV=1 - [BT3L4_HUMAN]	158	17.3	1.003	1.037	1.115	1.171	1.119	5	6	17	13	6.8	13	18.7	13	15.1	13	12.7	13	13.3
S4R3N0	BTN3A2		Butyrophilin subfamily 3 member A2 (Fragment) OS=Homo sapiens GN=BTN3A2 PE=4 SV=1 - [S4R3N0_HUMAN]	115	12.9	1.009	0.984	0.897	1.029	1	2	2	2	2	3.4	2	11	2	3.4	2	7.8	2	0.8
E9PC26	BUB1		Mitotic checkpoint serine/threonine-protein kinase BUB1 OS=Homo sapiens GN=BUB1 PE=2 SV=1 - [E9PC26_HUMAN]	1028	115.8	0.908	1.721	1.462	1.487	1.338	8	8	9	9	20.4	9	31.3	9	32.9	9	19	9	10.3
O60566	BUB1B	Mitotic checkpoint serine/threonine-protein kinase BUB1 beta	Mitotic checkpoint serine/threonine-protein kinase BUB1 beta OS=Homo sapiens GN=BUB1B PE=1 SV=3 - [BUB1B_HUMAN]	1050	119.5	0.848	1.293	1.443	1.334	1.27	14	14	14	14	8.6	14	15.5	14	26.6	14	23.7	14	4.6
O43684	BUB3	Mitotic checkpoint protein BUB3	Mitotic checkpoint protein BUB3 OS=Homo sapiens GN=BUB3 PE=1 SV=1 - [BUB3_HUMAN]	328	37.1	0.989	1.049	0.982	0.921	0.922	12	12	23	23	5.8	23	7.1	23	10.2	23	8.7	23	7.7
Q9BRD0	BUD13	BUD13 homolog	BUD13 homolog OS=Homo sapiens GN=BUD13 PE=1 SV=1 - [BUD13_HUMAN]	619	70.5	1.017	0.97	0.877	0.792	0.931	4	4	4	4	2.2	4	5	4	10	4	16.9	4	13.4
P41223	BUD31	Protein BUD31 homolog	Protein BUD31 homolog OS=Homo sapiens GN=BUD31 PE=1 SV=2 - [BUD31_HUMAN]	144	17	0.942	0.975	0.853	0.772	0.898	6	6	10	10	8.9	10	13	10	21.1	10	21.1	10	5.5
Q13895	BYSL	Bystin	Bystin OS=Homo sapiens GN=BYSL PE=1 SV=3 - [BYST_HUMAN]	437	49.6	0.915	0.835	0.628	0.583	0.818	15	15	23	23	7	23	17.3	23	18.1	23	15.8	23	8.6
O95153	BZRAP1	Peripheral-type benzodiazepine receptor-associated protein 1	Peripheral-type benzodiazepine receptor-associated protein 1 OS=Homo sapiens GN=BZRAP1 PE=1 SV=2 - [RIMB1_HUMAN]	1857	199.9	0.927	1.004	1.065	0.956	0.911	1	1	2	1	NaN	1	NaN	1	NaN	1	NaN	1	NaN
Q7L1Q6	BZW1	Basic leucine zipper and W2 domain-containing protein 1	Basic leucine zipper and W2 domain-containing protein 1 OS=Homo sapiens GN=BZW1 PE=1 SV=1 - [BZW1_HUMAN]	419	48	1.037	0.979	0.986	0.962	0.988	12	13	35	30	9	30	10.4	30	14.1	30	14.1	30	16.9
E7ETZ4	BZW2		Basic leucine zipper and W2 domain-containing protein 2 (Fragment) OS=Homo sapiens GN=BZW2 PE=2 SV=1 - [E7ETZ4_HUMAN]	408	46.9	1.016	0.936	0.838	0.809	0.919	18	19	36	33	5.9	33	14.2	33	10.6	33	13.8	33	13
Q7Z3E2	C10orf118	Uncharacterized protein C10orf118	Uncharacterized protein C10orf118 OS=Homo sapiens GN=C10orf118 PE=1 SV=2 - [CJ118_HUMAN]	898	103.6	0.891	1.307	1.091	1.027	1.393	3	3	3	3	7.5	3	3.5	3	4.3	3	10.7	3	18.5
Q96B45	C10orf32	UPF0693 protein C10orf32	UPF0693 protein C10orf32 OS=Homo sapiens GN=C10orf32 PE=1 SV=1 - [CJ032_HUMAN]	105	11.6	1.146	0.932	1.074	1.148	1.144	2	2	2	2	4	2	6.8	2	6.4	2	6.6	2	0
Q5SWW7	C10orf55	Uncharacterized protein C10orf55	Uncharacterized protein C10orf55 OS=Homo sapiens GN=C10orf55 PE=2 SV=1 - [CJ055_HUMAN]	151	16	0.912	1.056	1.246	1.046	0.945	1	1	2	1	NaN	1	NaN	1	NaN	1	NaN	1	NaN
Q5T2E7	C10orf76		UPF0668 protein C10orf76 OS=Homo sapiens GN=C10orf76 PE=2 SV=1 - [Q5T2E7_HUMAN]	198	22.9	0.923	0.984	1.128	1.358	1.024	2	2	2	2	11	2	9.2	2	9.7	2	6.3	2	32.4
Q9H8K7	C10orf88	Uncharacterized protein C10orf88	Uncharacterized protein C10orf88 OS=Homo sapiens GN=C10orf88 PE=1 SV=2 - [CJ088_HUMAN]	445	49.2	0.834	1.08	0.869	0.766	1.092	1	1	1	1	NaN	1	NaN	1	NaN	1	NaN	1	NaN
E9PMC9	C11orf30		Protein EMSY OS=Homo sapiens GN=C11orf30 PE=2 SV=1 - [E9PMC9_HUMAN]	1224	130.6	0.931	1.029	0.952	0.936	1.003	2	2	2	2	8.9	2	10.4	2	14.6	2	8.8	2	10.5
Q9H0W9	C11orf54	Ester hydrolase C11orf54	Ester hydrolase C11orf54 OS=Homo sapiens GN=C11orf54 PE=1 SV=1 - [CK054_HUMAN]	315	35.1	0.963	0.97	1.197	1.386	1.211	9	9	16	16	5.9	16	8.2	16	8.2	16	10.4	16	7.2
E9PM92	C11orf58		Small acidic protein (Fragment) OS=Homo sapiens GN=C11orf58 PE=2 SV=1 - [E9PM92_HUMAN]	156	17.5	0.992	1.063	1.033	0.964	1.137	3	3	10	9	6.2	10	6.9	10	25.5	10	9.8	10	16.8
Q9H3H3	C11orf68	UPF0696 protein C11orf68	UPF0696 protein C11orf68 OS=Homo sapiens GN=C11orf68 PE=1 SV=2 - [CK068_HUMAN]	251	27.3	1.037	0.96	0.953	0.995	1.005	6	6	7	7	4.4	7	5.1	7	1.5	7	10.3	7	7.8
Q53FT3	C11orf73	Protein Hikeshi	Protein Hikeshi OS=Homo sapiens GN=C11orf73 PE=1 SV=2 - [HIKES_HUMAN]	197	21.6	0.986	0.96	1.114	1.239	1.03	2	2	2	2	7.4	2	0.7	2	0.3	2	5.8	2	3
Q6UW78	C11orf83	UPF0723 protein C11orf83	UPF0723 protein C11orf83 OS=Homo sapiens GN=C11orf83 PE=1 SV=2 - [CK083_HUMAN]	93	10.1	0.897	1.011	1.156	1.137	1.173	1	1	3	3	22.2	3	6.5	3	6.2	3	17.5	3	4.3
Q9BUA3	C11orf84	Uncharacterized protein C11orf84	Uncharacterized protein C11orf84 OS=Homo sapiens GN=C11orf84 PE=1 SV=3 - [CK084_HUMAN]	381	41	0.905	1.055	1.016	0.939	0.908	3	3	3	3	12.1	3	5.4	3	2.3	3	17.4	3	4.1
Q9HB07	C12orf10	UPF0160 protein MYG1, mitochondrial	UPF0160 protein MYG1, mitochondrial OS=Homo sapiens GN=C12orf10 PE=1 SV=2 - [MYG1_HUMAN]	376	42.4	0.993	1.045	1.012	0.953	1.054	12	12	27	27	7.9	27	8.2	27	13.4	27	8.3	27	14.8
Q8WUH6	C12orf23	UPF0444 transmembrane protein C12orf23	UPF0444 transmembrane protein C12orf23 OS=Homo sapiens GN=C12orf23 PE=1 SV=1 - [CL023_HUMAN]	116	11.7	1.093	0.991	0.956	1.018	0.974	5	5	9	9	7.2	9	13.6	9	32.1	9	12	9	2.4
Q8N999	C12orf29	Uncharacterized protein C12orf29	Uncharacterized protein C12orf29 OS=Homo sapiens GN=C12orf29 PE=1 SV=2 - [CL029_HUMAN]	325	37.5	0.891	0.958	0.962	0.965	0.824	4	4	4	4	5.4	4	21	4	18	4	5.2	4	10.1
Q9NQ89	C12orf4	Uncharacterized protein C12orf4	Uncharacterized protein C12orf4 OS=Homo sapiens GN=C12orf4 PE=2 SV=1 - [CL004_HUMAN]	552	63.8	1.054	1.003	0.94	1.019	0.881	1	2	2	1	NaN	1	NaN	1	NaN	1	NaN	1	NaN
F5H3K2	C12orf43		Uncharacterized protein C12orf43 (Fragment) OS=Homo sapiens GN=C12orf43 PE=2 SV=1 - [F5H3K2_HUMAN]	188	20.5	1.052	1.084	0.872	0.777	0.864	3	3	3	3	3.8	3	2	3	23.1	3	5.1	3	0.8
H3BMZ4	C12orf44		Autophagy-related protein 101 (Fragment) OS=Homo sapiens GN=C12orf44 PE=2 SV=1 - [H3BMZ4_HUMAN]	84	9.5	0.88	0.936	1.088	1.09	0.848	1	1	1	1	NaN	1	NaN	1	NaN	1	NaN	1	NaN
Q8N5I9	C12orf45	Uncharacterized protein C12orf45	Uncharacterized protein C12orf45 OS=Homo sapiens GN=C12orf45 PE=1 SV=2 - [CL045_HUMAN]	185	20.1	0.933	0.981	0.673	0.601	1.02	5	5	5	5	6.2	5	0.9	5	2.5	5	12.8	5	2.3
Q99622	C12orf57	Protein C10	Protein C10 OS=Homo sapiens GN=C12orf57 PE=1 SV=1 - [C10_HUMAN]	126	13.2	1.035	0.731	0.675	0.636	1.026	3	3	5	4	0.4	4	2.8	4	1.7	4	4.1	4	2.9
Q9H3J6	C12orf65	Probable peptide chain release factor C12orf65, mitochondrial	Probable peptide chain release factor C12orf65, mitochondrial OS=Homo sapiens GN=C12orf65 PE=2 SV=1 - [CL065_HUMAN]	166	18.8	0.962	0.786	0.755	0.784	0.674	1	1	1	1	NaN	1	NaN	1	NaN	1	NaN	1	NaN
Q69YU5	C12orf73	Uncharacterized protein C12orf73	Uncharacterized protein C12orf73 OS=Homo sapiens GN=C12orf73 PE=2 SV=2 - [CL073_HUMAN]	71	8	0.896	1.137	1.064	0.859	0.984	1	1	1	1	NaN	1	NaN	1	NaN	1	NaN	1	NaN
Q9UKR5	C14orf1	Probable ergosterol biosynthetic protein 28	Probable ergosterol biosynthetic protein 28 OS=Homo sapiens GN=C14orf1 PE=1 SV=1 - [ERG28_HUMAN]	140	15.9	1.044	0.915	0.801	0.909	1.003	1	1	1	1	NaN	1	NaN	1	NaN	1	NaN	1	NaN
Q9NWQ9	C14orf119	Uncharacterized protein C14orf119	Uncharacterized protein C14orf119 OS=Homo sapiens GN=C14orf119 PE=1 SV=1 - [CN119_HUMAN]	140	16	0.681	0.833	0.495	0.488	0.834	1	1	1	1	NaN	1	NaN	1	NaN	1	NaN	1	NaN
Q9BXV9	C14orf142	Uncharacterized protein C14orf142	Uncharacterized protein C14orf142 OS=Homo sapiens GN=C14orf142 PE=2 SV=2 - [CN142_HUMAN]	100	10.9	0.993	1.169	1.15	1.274	1.365	3	3	8	8	9	8	8.1	8	7.1	8	10.3	8	14.6
Q7Z3D6	C14orf159	UPF0317 protein C14orf159, mitochondrial	UPF0317 protein C14orf159, mitochondrial OS=Homo sapiens GN=C14orf159 PE=1 SV=2 - [CN159_HUMAN]	616	66.4	0.923	0.993	1.032	1.188	1.064	2	10	12	2	2.2	2	11.1	2	0.3	2	0.5	2	3.1
H0YB09	C14orf159		UPF0317 protein C14orf159, mitochondrial (Fragment) OS=Homo sapiens GN=C14orf159 PE=4 SV=1 - [H0YB09_HUMAN]	564	60.6	1.07	0.95	1.086	1.211	1.052	1	9	12	2	7.5	2	2.1	2	1.7	2	0.3	2	5.9
Q9Y224	C14orf166	UPF0568 protein C14orf166	UPF0568 protein C14orf166 OS=Homo sapiens GN=C14orf166 PE=1 SV=1 - [CN166_HUMAN]	244	28.1	1.018	0.976	0.961	0.963	0.982	9	9	20	20	5	20	5.6	20	13.4	20	8.6	20	12.1
H3BQZ5	C15orf40		UPF0235 protein C15orf40 OS=Homo sapiens GN=C15orf40 PE=2 SV=1 - [H3BQZ5_HUMAN]	68	7.5	0.999	1.08	1.096	1.078	1.003	1	1	2	2	10	2	14.5	2	10.1	2	22.2	2	8.7
H0YN78	C15orf57		Uncharacterized protein C15orf57 (Fragment) OS=Homo sapiens GN=C15orf57 PE=2 SV=1 - [H0YN78_HUMAN]	170	19.2	1.034	1.07	1.453	1.396	1.363	2	2	2	2	21.3	2	4.9	2	13.1	2	8.5	2	3.7
Q96S19	C16orf13	UPF0585 protein C16orf13	UPF0585 protein C16orf13 OS=Homo sapiens GN=C16orf13 PE=1 SV=2 - [CP013_HUMAN]	204	22.6	1.044	0.919	0.895	0.999	0.902	7	7	12	11	7.1	12	6.4	12	9.7	12	11.2	12	14.4
H3BSM7	C16orf58		UPF0420 protein C16orf58 OS=Homo sapiens GN=C16orf58 PE=2 SV=1 - [H3BSM7_HUMAN]	466	50.8	1.051	0.965	1.022	0.994	0.902	10	10	11	11	3	11	14.1	11	14.9	11	11.3	11	15.3
G5E9I3	C16orf62		Esophageal cancer associated protein, isoform CRA_c OS=Homo sapiens GN=C16orf62 PE=2 SV=1 - [G5E9I3_HUMAN]	870	98.8	1.073	0.94	0.89	0.983	0.962	7	7	8	8	15.9	8	10.9	8	4.8	8	11.4	8	10.3
Q9Y6A4	C16orf80	UPF0468 protein C16orf80	UPF0468 protein C16orf80 OS=Homo sapiens GN=C16orf80 PE=1 SV=1 - [CP080_HUMAN]	193	22.8	1.053	1.019	0.879	0.876	0.906	3	3	5	5	6.1	5	1.5	5	12.2	5	14.4	5	4.9
Q6PH81	C16orf87	UPF0547 protein C16orf87	UPF0547 protein C16orf87 OS=Homo sapiens GN=C16orf87 PE=1 SV=1 - [CP087_HUMAN]	154	17.8	1.147	1.06	0.796	0.808	1.146	2	2	2	2	1.8	2	26.1	2	2.9	2	27.5	2	18.2
Q96GS4	C17orf59	Uncharacterized protein C17orf59	Uncharacterized protein C17orf59 OS=Homo sapiens GN=C17orf59 PE=1 SV=2 - [CQ059_HUMAN]	357	37.2	1.046	0.997	1.237	1.152	1.051	3	3	4	4	10.9	4	8.6	4	7.5	4	9.6	4	22.9
Q9BQA9	C17orf62	Uncharacterized protein C17orf62	Uncharacterized protein C17orf62 OS=Homo sapiens GN=C17orf62 PE=1 SV=1 - [CQ062_HUMAN]	187	20.8	1.033	1.032	1.245	1.273	1.129	3	3	4	4	5.1	4	8.6	4	12.1	4	8.4	4	13.9
J9JIC5	C17orf75		Protein Njmu-R1 OS=Homo sapiens GN=C17orf75 PE=4 SV=1 - [J9JIC5_HUMAN]	396	44.6	0.976	0.934	1.055	0.989	0.974	7	7	8	8	10.1	8	13.3	8	5.8	8	12.6	8	14.1
J3KT60	C17orf80		Uncharacterized protein C17orf80 (Fragment) OS=Homo sapiens GN=C17orf80 PE=4 SV=1 - [J3KT60_HUMAN]	109	12.3	1.016	1.008	0.976	1.215	1.31	1	1	1	1	NaN	1	NaN	1	NaN	1	NaN	1	NaN
Q53F19	C17orf85	Uncharacterized protein C17orf85	Uncharacterized protein C17orf85 OS=Homo sapiens GN=C17orf85 PE=1 SV=2 - [CQ085_HUMAN]	620	70.5	1.003	0.987	0.967	0.983	1.093	11	12	14	13	7.1	13	7.3	13	4.4	13	13.4	13	12.6
H7C5B9	C17orf97		Uncharacterized protein C17orf97 (Fragment) OS=Homo sapiens GN=C17orf97 PE=2 SV=1 - [H7C5B9_HUMAN]	209	23.1	0.991	1.004	0.861	0.851	0.961	1	1	2	2	1.8	2	5.9	2	10.7	2	5.7	2	1.6
K7EQH1	C18orf25		Uncharacterized protein C18orf25 (Fragment) OS=Homo sapiens GN=C18orf25 PE=4 SV=1 - [K7EQH1_HUMAN]	146	15.5	1.031	1.168	1.002	1.045	1.088	2	2	2	2	0.6	2	12.5	2	27.3	2	41.4	2	13.2
Q8TCD1	C18orf32	UPF0729 protein C18orf32	UPF0729 protein C18orf32 OS=Homo sapiens GN=C18orf32 PE=2 SV=1 - [CR032_HUMAN]	76	8.7	0.984	1.19	1.281	1.24	1.126	2	2	4	4	3.9	4	4.8	4	11.7	4	17.6	4	2.1
K7ENL9	C18orf8		Uncharacterized protein C18orf8 OS=Homo sapiens GN=C18orf8 PE=4 SV=1 - [K7ENL9_HUMAN]	609	69.3	0.997	1.042	1.069	0.973	1.011	6	6	7	7	7.6	7	8.6	7	7.2	7	19.3	7	6.5
Q969H8	C19orf10	UPF0556 protein C19orf10	UPF0556 protein C19orf10 OS=Homo sapiens GN=C19orf10 PE=1 SV=1 - [CS010_HUMAN]	173	18.8	0.97	1.017	1.267	1.305	1.037	5	5	7	7	10.9	7	7.3	7	3.6	7	4.6	7	2.5
Q9UFG5	C19orf25	UPF0449 protein C19orf25	UPF0449 protein C19orf25 OS=Homo sapiens GN=C19orf25 PE=1 SV=2 - [CS025_HUMAN]	118	12.9	0.966	1.106	1.094	1.117	1.115	3	3	6	6	5.8	6	10.3	6	7.6	6	9.4	6	9.1
Q9BQ61	C19orf43	Uncharacterized protein C19orf43	Uncharacterized protein C19orf43 OS=Homo sapiens GN=C19orf43 PE=1 SV=1 - [CS043_HUMAN]	176	18.4	1.003	0.994	0.807	0.788	0.957	5	5	15	14	8.6	14	6.1	14	16.5	14	13.7	14	7.2
Q8N9M1	C19orf47	Uncharacterized protein C19orf47	Uncharacterized protein C19orf47 OS=Homo sapiens GN=C19orf47 PE=1 SV=1 - [CS047_HUMAN]	422	44.7	0.923	0.995	0.902	0.924	1.025	3	3	3	3	2.5	3	9.8	3	3.5	3	2.3	3	5.4
Q9BSF4	C19orf52	Uncharacterized protein C19orf52	Uncharacterized protein C19orf52 OS=Homo sapiens GN=C19orf52 PE=1 SV=2 - [CS052_HUMAN]	260	29.2	1.161	1.179	1.093	0.986	0.983	2	2	2	2	7.2	2	4.7	2	3.7	2	1.3	2	2.7
Q9UNZ5	C19orf53	Leydig cell tumor 10 kDa protein homolog	Leydig cell tumor 10 kDa protein homolog OS=Homo sapiens GN=C19orf53 PE=1 SV=1 - [L10K_HUMAN]	99	10.6	0.888	0.822	0.731	0.623	0.873	3	3	4	4	3.9	4	3.3	4	2.5	4	1.3	4	3.8
Q9NUL5	C19orf66	UPF0515 protein C19orf66	UPF0515 protein C19orf66 OS=Homo sapiens GN=C19orf66 PE=2 SV=2 - [CS066_HUMAN]	291	33.1	0.969	0.893	0.953	0.979	0.97	4	4	7	7	7.4	7	17.7	7	9.9	7	12.7	7	15.1
K7EIR2	C19orf70		Protein QIL1 OS=Homo sapiens GN=C19orf70 PE=4 SV=1 - [K7EIR2_HUMAN]	88	9.7	0.97	1.007	1.001	1.038	0.938	1	1	2	2	0.3	2	4.6	2	0.7	2	4.6	2	10.4
Q13901	C1D	Nuclear nucleic acid-binding protein C1D	Nuclear nucleic acid-binding protein C1D OS=Homo sapiens GN=C1D PE=1 SV=1 - [C1D_HUMAN]	141	16	1.101	1.351	1.17	1.166	1.327	1	1	1	1	NaN	1	NaN	1	NaN	1	NaN	1	NaN
Q9NS00	C1GALT1	Glycoprotein-N-acetylgalactosamine 3-beta-galactosyltransferase 1	Glycoprotein-N-acetylgalactosamine 3-beta-galactosyltransferase 1 OS=Homo sapiens GN=C1GALT1 PE=1 SV=1 - [C1GLT_HUMAN]	363	42.2	0.862	1.05	1.224	1.312	1.075	1	1	1	1	NaN	1	NaN	1	NaN	1	NaN	1	NaN
Q96EU7	C1GALT1C1	C1GALT1-specific chaperone 1	C1GALT1-specific chaperone 1 OS=Homo sapiens GN=C1GALT1C1 PE=1 SV=1 - [C1GLC_HUMAN]	318	36.4	0.989	1.105	1.272	1.207	1.013	2	2	2	2	4.9	2	9.9	2	13.4	2	14.8	2	7.7
Q9NSG2	C1orf112	Uncharacterized protein C1orf112	Uncharacterized protein C1orf112 OS=Homo sapiens GN=C1orf112 PE=1 SV=1 - [CA112_HUMAN]	853	96.5	0.777	1.367	1.424	1.136	1.258	3	3	3	3	18.4	3	23	3	32.9	3	25.1	3	11.8
Q6ZSJ8	C1orf122	Uncharacterized protein C1orf122	Uncharacterized protein C1orf122 OS=Homo sapiens GN=C1orf122 PE=2 SV=2 - [CA122_HUMAN]	110	11.5	0.751	0.921	0.892	0.851	0.862	3	3	4	4	2.1	4	2.8	4	2.7	4	15.1	4	2
Q9NWV4	C1orf123	UPF0587 protein C1orf123	UPF0587 protein C1orf123 OS=Homo sapiens GN=C1orf123 PE=1 SV=1 - [CA123_HUMAN]	160	18	1.067	0.938	0.975	1.072	0.884	7	7	15	12	6.7	12	10.2	12	12.6	12	10.1	12	7.3
Q8NDD1	C1orf131	Uncharacterized protein C1orf131	Uncharacterized protein C1orf131 OS=Homo sapiens GN=C1orf131 PE=1 SV=3 - [CA131_HUMAN]	294	32.7	0.955	0.847	0.844	0.81	0.836	4	4	4	3	7.1	3	21.6	3	12.5	3	10	3	1.4
H0Y5L4	C1orf167		Uncharacterized protein C1orf167 (Fragment) OS=Homo sapiens GN=C1orf167 PE=4 SV=1 - [H0Y5L4_HUMAN]	532	59.2	0.974	0.921	1.122	0.928	0.831	1	1	1	1	NaN	1	NaN	1	NaN	1	NaN	1	NaN
Q8IYL3	C1orf174	UPF0688 protein C1orf174	UPF0688 protein C1orf174 OS=Homo sapiens GN=C1orf174 PE=1 SV=2 - [CA174_HUMAN]	243	26	0.981	1.021	0.948	0.894	0.951	7	7	10	10	4.1	10	6.6	10	9.6	10	10.8	10	10.8
Q9H425	C1orf198	Uncharacterized protein C1orf198	Uncharacterized protein C1orf198 OS=Homo sapiens GN=C1orf198 PE=1 SV=1 - [CA198_HUMAN]	327	36.3	0.94	1.049	0.843	0.854	1.303	3	3	3	3	0.2	3	2.6	3	12.5	3	0.2	3	10.2
Q9BV19	C1orf50	Uncharacterized protein C1orf50	Uncharacterized protein C1orf50 OS=Homo sapiens GN=C1orf50 PE=2 SV=2 - [CA050_HUMAN]	199	21.9	1.009	0.982	1.349	1.332	1.188	3	3	5	5	13.5	5	9.2	5	3.9	5	6.6	5	13.1
Q8N6N3	C1orf52	UPF0690 protein C1orf52	UPF0690 protein C1orf52 OS=Homo sapiens GN=C1orf52 PE=1 SV=1 - [CA052_HUMAN]	182	20.6	1.05	1.056	0.916	1.082	1.086	3	3	3	3	2.8	3	15	3	5.2	3	0.9	3	13.4
Q07021	C1QBP	Complement component 1 Q subcomponent-binding protein, mitochondrial	Complement component 1 Q subcomponent-binding protein, mitochondrial OS=Homo sapiens GN=C1QBP PE=1 SV=1 - [C1QBP_HUMAN]	282	31.3	0.996	0.991	0.978	0.887	0.794	9	9	45	45	8.2	45	13	45	11.8	45	10.8	45	14.2
F5H1V0	C1R		Complement C1r subcomponent OS=Homo sapiens GN=C1R PE=2 SV=1 - [F5H1V0_HUMAN]	144	16.2	1.714	0.628	1.09	1.298	0.882	1	1	1	1	NaN	1	NaN	1	NaN	1	NaN	1	NaN
Q9GZN8	C20orf27	UPF0687 protein C20orf27	UPF0687 protein C20orf27 OS=Homo sapiens GN=C20orf27 PE=1 SV=3 - [CT027_HUMAN]	174	19.3	0.947	0.994	0.941	0.91	1.068	5	5	8	8	7.3	8	5.8	8	3.4	8	4.5	8	5.7
P30042	C21orf33	ES1 protein homolog, mitochondrial	ES1 protein homolog, mitochondrial OS=Homo sapiens GN=C21orf33 PE=1 SV=3 - [ES1_HUMAN]	268	28.2	0.987	0.909	0.973	0.961	0.77	7	7	18	18	7.8	18	3.4	18	11.4	18	5.8	18	13.8
P57076	C21orf59	Uncharacterized protein C21orf59	Uncharacterized protein C21orf59 OS=Homo sapiens GN=C21orf59 PE=1 SV=1 - [CU059_HUMAN]	290	33.2	0.856	1.114	0.786	0.618	1.007	7	7	8	8	7.5	8	12	8	20.1	8	8.1	8	4.4
Q9Y3I0	C22orf28	tRNA-splicing ligase RtcB homolog	tRNA-splicing ligase RtcB homolog OS=Homo sapiens GN=RTCB PE=1 SV=1 - [RTCB_HUMAN]	505	55.2	1.03	0.939	0.99	1.025	0.908	22	22	55	55	6.2	55	7.7	55	11.6	55	9	55	8.1
F5H0U2	C2CD3		C2 domain-containing protein 3 OS=Homo sapiens GN=C2CD3 PE=2 SV=1 - [F5H0U2_HUMAN]	506	56.3	1.009	1.157	0.858	0.838	1.242	1	1	1	1	NaN	1	NaN	1	NaN	1	NaN	1	NaN
B4DRN7	C2CD5		C2 domain-containing protein 5 OS=Homo sapiens GN=C2CD5 PE=2 SV=1 - [B4DRN7_HUMAN]	1051	116	1.041	0.974	1.035	1.103	1.063	9	9	11	11	8.3	11	10.1	11	19.1	11	10.8	11	7.7
B5MCE2	C2orf43		UPF0554 protein C2orf43 (Fragment) OS=Homo sapiens GN=C2orf43 PE=2 SV=2 - [B5MCE2_HUMAN]	146	16.4	0.927	1.262	1.527	1.564	1.175	3	3	4	4	10.5	4	4.7	4	12	4	7.1	4	7.4
Q9H6R7	C2orf44	WD repeat-containing protein C2orf44	WD repeat-containing protein C2orf44 OS=Homo sapiens GN=C2orf44 PE=1 SV=1 - [CB044_HUMAN]	721	79.1	0.978	1.005	0.837	0.908	0.94	3	3	3	3	4.4	3	0.1	3	3.5	3	2.8	3	1.5
Q8WWC4	C2orf47	Uncharacterized protein C2orf47, mitochondrial	Uncharacterized protein C2orf47, mitochondrial OS=Homo sapiens GN=C2orf47 PE=1 SV=1 - [CB047_HUMAN]	291	32.5	0.995	1.027	0.953	0.922	0.919	6	6	9	9	1.3	9	12.7	9	5.9	9	7.6	9	6.5
Q9BVC5	C2orf49	Ashwin	Ashwin OS=Homo sapiens GN=C2orf49 PE=1 SV=1 - [ASHWN_HUMAN]	232	25.8	1.008	0.976	0.917	0.915	0.915	4	4	4	4	4.2	4	1.6	4	1.8	4	3.1	4	6.9
Q8N8R5	C2orf69	UPF0565 protein C2orf69	UPF0565 protein C2orf69 OS=Homo sapiens GN=C2orf69 PE=1 SV=1 - [CB069_HUMAN]	385	43.4	0.957	0.978	1.103	1.02	0.905	3	3	4	4	14.7	4	1.6	4	5.7	4	8.3	4	5
Q3KRA6	C2orf76	UPF0538 protein C2orf76	UPF0538 protein C2orf76 OS=Homo sapiens GN=C2orf76 PE=1 SV=3 - [CB076_HUMAN]	126	14.6	1.018	0.977	1.259	1.374	1.235	3	3	3	3	3.3	3	1.7	3	6.3	3	3.9	3	0.5
A8MVI8	C3orf17		Chromosome 3 open reading frame 17, isoform CRA_c OS=Homo sapiens GN=C3orf17 PE=2 SV=1 - [A8MVI8_HUMAN]	431	49.6	0.617	0.521	0.53	0.551	0.452	1	1	1	1	NaN	1	NaN	1	NaN	1	NaN	1	NaN
E7EMP6	C3orf37		UPF0361 protein C3orf37 OS=Homo sapiens GN=C3orf37 PE=2 SV=1 - [E7EMP6_HUMAN]	312	35.5	1.024	1.115	1.121	1.107	1.159	6	6	9	9	5.7	9	3.1	9	7.4	9	12	9	8.9
Q5JPI3	C3orf38	Uncharacterized protein C3orf38	Uncharacterized protein C3orf38 OS=Homo sapiens GN=C3orf38 PE=2 SV=1 - [CC038_HUMAN]	329	37.5	0.98	1.093	1.171	1.239	0.983	4	4	5	5	11.8	5	3.7	5	14.6	5	21.8	5	29.3
Q8NDZ4	C3orf58	Deleted in autism protein 1	Deleted in autism protein 1 OS=Homo sapiens GN=C3orf58 PE=2 SV=1 - [DIA1_HUMAN]	430	49.5	1.062	1.183	1.134	1.086	1.28	4	4	4	4	5.3	4	13.9	4	11.2	4	6.1	4	16.6
Q9NWY4	C4orf27	UPF0609 protein C4orf27	UPF0609 protein C4orf27 OS=Homo sapiens GN=C4orf27 PE=1 SV=2 - [CD027_HUMAN]	346	39.4	0.995	1.099	1.05	0.897	1.058	12	12	22	22	6.6	22	9.9	22	10.4	22	8.8	22	12.4
Q8WVX3	C4orf3	Uncharacterized protein C4orf3	Uncharacterized protein C4orf3 OS=Homo sapiens GN=C4orf3 PE=4 SV=2 - [CD003_HUMAN]	66	7.6	1.086	1.157	1.158	1.115	0.958	1	1	1	1	NaN	1	NaN	1	NaN	1	NaN	1	NaN
Q8N8J7	C4orf32	Uncharacterized protein C4orf32	Uncharacterized protein C4orf32 OS=Homo sapiens GN=C4orf32 PE=2 SV=2 - [CD032_HUMAN]	132	14.6	0.883	1.609	1.881	1.996	1.658	2	2	3	3	10.6	3	51.6	3	31.7	3	20.7	3	50.1
Q49AR2	C5orf22	UPF0489 protein C5orf22	UPF0489 protein C5orf22 OS=Homo sapiens GN=C5orf22 PE=1 SV=2 - [CE022_HUMAN]	442	49.9	0.933	1.096	1.211	1.06	1.063	3	3	3	3	4.4	3	4.3	3	16.5	3	23	3	11.1
H0YAE0	C5orf24		UPF0461 protein C5orf24 (Fragment) OS=Homo sapiens GN=C5orf24 PE=4 SV=1 - [H0YAE0_HUMAN]	84	9.6	1.028	1.154	1.119	1.002	1.265	2	2	2	2	7.1	2	1.2	2	22.2	2	15.8	2	8.3
A6NDU8	C5orf51	UPF0600 protein C5orf51	UPF0600 protein C5orf51 OS=Homo sapiens GN=C5orf51 PE=1 SV=1 - [CE051_HUMAN]	294	33.6	0.998	1.109	1.143	1.141	1.119	3	3	3	3	7.6	3	7	3	27.7	3	20.4	3	8.8
Q9H6K1	C6orf106	Uncharacterized protein C6orf106	Uncharacterized protein C6orf106 OS=Homo sapiens GN=C6orf106 PE=1 SV=2 - [CF106_HUMAN]	298	32.9	1.106	1.038	0.9	1.04	0.993	1	1	1	1	NaN	1	NaN	1	NaN	1	NaN	1	NaN
Q9P0P8	C6orf203	Uncharacterized protein C6orf203	Uncharacterized protein C6orf203 OS=Homo sapiens GN=C6orf203 PE=1 SV=1 - [CF203_HUMAN]	240	27.9	1.006	1.075	1.11	1.103	0.998	2	2	4	4	19.7	4	11.9	4	7.6	4	6.3	4	10.3
Q9H993	C6orf211	UPF0364 protein C6orf211	UPF0364 protein C6orf211 OS=Homo sapiens GN=C6orf211 PE=1 SV=1 - [CF211_HUMAN]	441	51.1	1.017	1.041	1.276	1.561	1.21	12	12	21	21	4.8	21	7.3	21	7.3	20	11.1	21	10.8
Q5TDC5	C6orf89		Bombesin receptor-activated protein C6orf89 OS=Homo sapiens GN=C6orf89 PE=2 SV=1 - [Q5TDC5_HUMAN]	241	27.8	1.266	1.475	1.553	1.772	1.329	1	1	1	1	NaN	1	NaN	1	NaN	1	NaN	1	NaN
Q9BPX7	C7orf25	UPF0415 protein C7orf25	UPF0415 protein C7orf25 OS=Homo sapiens GN=C7orf25 PE=1 SV=1 - [CG025_HUMAN]	421	46.4	1.079	1.087	1.278	1.525	1.295	2	2	3	3	10.5	3	18.2	3	22.9	3	20.7	3	15.7
Q96N11	C7orf26	Uncharacterized protein C7orf26	Uncharacterized protein C7orf26 OS=Homo sapiens GN=C7orf26 PE=2 SV=1 - [CG026_HUMAN]	449	50	1.128	1.034	0.985	0.905	1.036	2	2	3	3	1.7	3	29.1	3	1.8	3	4.6	3	4.8
C9JQV0	C7orf50		Uncharacterized protein C7orf50 (Fragment) OS=Homo sapiens GN=C7orf50 PE=2 SV=1 - [C9JQV0_HUMAN]	192	21.9	0.907	1.118	0.906	0.749	1.03	4	4	6	6	1.7	6	5.4	6	1.5	6	5.3	6	2.9
Q96HJ9	C7orf55	UPF0562 protein C7orf55	UPF0562 protein C7orf55 OS=Homo sapiens GN=C7orf55 PE=1 SV=2 - [CG055_HUMAN]	113	12.7	0.987	1.293	1.561	1.547	1.414	1	1	1	1	NaN	1	NaN	1	NaN	1	NaN	1	NaN
Q9H7E9	C8orf33	UPF0488 protein C8orf33	UPF0488 protein C8orf33 OS=Homo sapiens GN=C8orf33 PE=1 SV=1 - [CH033_HUMAN]	229	25	0.924	0.963	0.744	0.631	0.739	4	4	4	4	7.4	4	4.3	4	5.6	4	8.2	4	3.6
Q8N0T1	C8orf59	Uncharacterized protein C8orf59	Uncharacterized protein C8orf59 OS=Homo sapiens GN=C8orf59 PE=1 SV=3 - [CH059_HUMAN]	98	11.2	0.961	0.714	0.421	0.38	0.667	3	3	3	3	4	3	3.4	3	17.6	3	33.7	3	9.8
Q6P1X6	C8orf82	UPF0598 protein C8orf82	UPF0598 protein C8orf82 OS=Homo sapiens GN=C8orf82 PE=1 SV=2 - [CH082_HUMAN]	216	23.9	0.934	0.931	0.923	1.058	0.884	4	5	6	5	6.7	5	6.6	5	20.4	5	13.5	5	7.5
Q5T280	C9orf114	Uncharacterized protein C9orf114	Uncharacterized protein C9orf114 OS=Homo sapiens GN=C9orf114 PE=1 SV=3 - [CI114_HUMAN]	376	42	1.035	0.94	0.757	0.683	0.807	3	3	3	3	0.3	3	0.3	3	2.2	3	8.2	3	1.3
Q9BUH6	C9orf142	Uncharacterized protein C9orf142	Uncharacterized protein C9orf142 OS=Homo sapiens GN=C9orf142 PE=1 SV=2 - [CI142_HUMAN]	204	21.6	1.053	0.94	1.073	1.161	1.041	8	8	13	13	10.9	13	12.2	13	8.9	13	5.1	13	7.3
Q9BUW7	C9orf16	UPF0184 protein C9orf16	UPF0184 protein C9orf16 OS=Homo sapiens GN=C9orf16 PE=1 SV=1 - [CI016_HUMAN]	83	9	0.845	1.294	0.943	1.066	1.226	1	1	1	1	NaN	1	NaN	1	NaN	1	NaN	1	NaN
Q8IXQ3	C9orf40	Uncharacterized protein C9orf40	Uncharacterized protein C9orf40 OS=Homo sapiens GN=C9orf40 PE=1 SV=1 - [CI040_HUMAN]	194	21.1	0.804	0.964	0.684	0.545	0.956	1	1	1	1	NaN	1	NaN	1	NaN	1	NaN	1	NaN
B4DSD4	C9orf41		UPF0586 protein C9orf41 OS=Homo sapiens GN=C9orf41 PE=2 SV=1 - [B4DSD4_HUMAN]	196	22.5	1.015	1.013	0.835	0.865	0.92	2	2	2	2	6.2	2	6.4	2	5.1	2	7.2	2	8.2
Q5T6V5	C9orf64	UPF0553 protein C9orf64	UPF0553 protein C9orf64 OS=Homo sapiens GN=C9orf64 PE=1 SV=1 - [CI064_HUMAN]	341	39	1.017	1.036	1.3	1.282	1.184	10	10	15	15	12.7	15	9	15	6.9	15	7.1	15	12.8
Q9NZ63	C9orf78	Uncharacterized protein C9orf78	Uncharacterized protein C9orf78 OS=Homo sapiens GN=C9orf78 PE=1 SV=1 - [CI078_HUMAN]	289	33.7	0.965	1.121	0.777	0.663	1.055	8	8	15	15	6.3	15	8.1	15	15.6	15	11.9	15	9.1
P35219	CA8	Carbonic anhydrase-related protein	Carbonic anhydrase-related protein OS=Homo sapiens GN=CA8 PE=1 SV=3 - [CAH8_HUMAN]	290	33	0.99	0.94	0.93	0.898	1.012	5	5	7	7	14.3	7	3	7	1.3	7	12.3	7	7.6
Q16790	CA9	Carbonic anhydrase 9	Carbonic anhydrase 9 OS=Homo sapiens GN=CA9 PE=1 SV=2 - [CAH9_HUMAN]	459	49.7	1.036	0.768	0.728	0.59	0.814	4	4	8	8	4.1	8	5.8	8	6.6	8	9.7	8	4.4
Q9H8G2	CAAP1	Caspase activity and apoptosis inhibitor 1	Caspase activity and apoptosis inhibitor 1 OS=Homo sapiens GN=CAAP1 PE=1 SV=2 - [CAAP1_HUMAN]	361	38.3	1.03	1.056	1.079	1.241	1.133	3	3	3	3	1.2	3	12.2	3	22	3	1.4	3	8.4
Q9Y376	CAB39	Calcium-binding protein 39	Calcium-binding protein 39 OS=Homo sapiens GN=CAB39 PE=1 SV=1 - [CAB39_HUMAN]	341	39.8	1.029	0.954	0.945	0.997	0.842	14	14	19	18	3.3	18	13.8	18	16.4	18	5.3	18	10.4
Q9Y6J0	CABIN1	Calcineurin-binding protein cabin-1	Calcineurin-binding protein cabin-1 OS=Homo sapiens GN=CABIN1 PE=1 SV=1 - [CABIN_HUMAN]	2220	246.2	0.893	1.023	0.796	0.88	1.103	7	7	8	8	4.7	8	26.8	8	22.1	8	16.9	8	7.4
H0Y5H2	CABLES2		CDK5 and ABL1 enzyme substrate 2 (Fragment) OS=Homo sapiens GN=CABLES2 PE=3 SV=1 - [H0Y5H2_HUMAN]	258	29	1.024	0.939	1.091	1.299	1.236	1	1	1	1	NaN	1	NaN	1	NaN	1	NaN	1	NaN
Q9UGQ2	CACFD1	Calcium channel flower homolog	Calcium channel flower homolog OS=Homo sapiens GN=CACFD1 PE=2 SV=1 - [FLOWR_HUMAN]	172	18.5	0.833	0.965	1.247	1.754	1.831	1	1	1	1	NaN	1	NaN	1	NaN	1	NaN	1	NaN
Q8WUQ7	CACTIN	Cactin	Cactin OS=Homo sapiens GN=CACTIN PE=1 SV=3 - [CATIN_HUMAN]	758	88.6	1.031	0.953	0.856	0.761	0.918	5	5	5	5	15.3	5	11.9	5	3.4	5	8.2	5	6.9
Q86Y37	CACUL1	CDK2-associated and cullin domain-containing protein 1	CDK2-associated and cullin domain-containing protein 1 OS=Homo sapiens GN=CACUL1 PE=1 SV=1 - [CACL1_HUMAN]	369	41	0.972	0.936	0.885	0.991	1.06	2	2	2	2	2.3	2	17.4	2	1.7	2	12.9	2	14.3
Q9HB71	CACYBP	Calcyclin-binding protein	Calcyclin-binding protein OS=Homo sapiens GN=CACYBP PE=1 SV=2 - [CYBP_HUMAN]	228	26.2	1.009	0.941	0.95	0.869	0.858	14	15	32	29	6.6	29	4.5	29	10.5	29	8.2	29	11.1
F8VPD4	CAD		DNA fragmentation factor subunit beta OS=Homo sapiens GN=CAD PE=2 SV=1 - [F8VPD4_HUMAN]	2162	235.9	0.964	0.975	0.927	0.87	0.953	47	51	101	95	8.8	95	9.8	95	13.5	95	12.5	95	10.3
Q9P1Z2	CALCOCO1	Calcium-binding and coiled-coil domain-containing protein 1	Calcium-binding and coiled-coil domain-containing protein 1 OS=Homo sapiens GN=CALCOCO1 PE=1 SV=2 - [CACO1_HUMAN]	691	77.3	0.753	1.301	1.562	1.197	1.172	2	2	3	3	22.8	3	7.8	3	24	3	5.4	3	9.8
Q13137	CALCOCO2	Calcium-binding and coiled-coil domain-containing protein 2	Calcium-binding and coiled-coil domain-containing protein 2 OS=Homo sapiens GN=CALCOCO2 PE=1 SV=1 - [CACO2_HUMAN]	446	52.2	0.611	1.218	0.911	0.909	1.051	9	9	12	12	21.5	12	12.9	12	21.3	12	22.6	12	15.4
P62158	CALM1	Calmodulin	Calmodulin OS=Homo sapiens GN=CALM1 PE=1 SV=2 - [CALM_HUMAN]	149	16.8	1.01	1.06	1.009	1.081	1.192	11	11	65	57	7.7	57	12	57	14.4	57	10.3	57	20.8
P27797	CALR	Calreticulin	Calreticulin OS=Homo sapiens GN=CALR PE=1 SV=1 - [CALR_HUMAN]	417	48.1	1.007	1.016	1.09	1.141	1.167	22	22	127	113	7.5	113	12.4	113	13.9	113	14.5	113	15.1
O43852	CALU	Calumenin	Calumenin OS=Homo sapiens GN=CALU PE=1 SV=2 - [CALU_HUMAN]	315	37.1	0.946	0.951	1.175	1.427	0.934	17	17	43	43	10.4	43	10.6	43	19.5	43	13.6	43	14.3
Q8IU85	CAMK1D	Calcium/calmodulin-dependent protein kinase type 1D	Calcium/calmodulin-dependent protein kinase type 1D OS=Homo sapiens GN=CAMK1D PE=1 SV=1 - [KCC1D_HUMAN]	385	42.9	0.986	1.018	1.241	1.191	1.251	2	2	2	2	10.7	2	6.2	2	7.8	2	11.4	2	10.7
E9PBG7	CAMK2D		Calcium/calmodulin-dependent protein kinase type II subunit delta OS=Homo sapiens GN=CAMK2D PE=2 SV=1 - [E9PBG7_HUMAN]	512	57.7	1.033	1.01	1.101	1.312	1.374	1	12	31	1	NaN	1	NaN	1	NaN	1	NaN	1	NaN
D6R938	CAMK2D		Calcium/calmodulin-dependent protein kinase (CaM kinase) II delta, isoform CRA_e OS=Homo sapiens GN=CAMK2D PE=2 SV=1 - [D6R938_HUMAN]	498	56.3	0.892	1.018	1.179	1.278	1.471	1	12	31	1	NaN	1	NaN	1	NaN	1	NaN	1	NaN
Q5SWX3	CAMK2G		Calcium/calmodulin-dependent protein kinase (CaM kinase) II gamma, isoform CRA_n OS=Homo sapiens GN=CAMK2G PE=2 SV=1 - [Q5SWX3_HUMAN]	516	57.8	1.038	1.059	1.201	1.212	1.015	7	10	22	13	10.5	13	10.6	13	16.4	13	20.4	13	9.2
F5GZ00	CAMKK2		Calcium/calmodulin-dependent protein kinase kinase 2 OS=Homo sapiens GN=CAMKK2 PE=2 SV=1 - [F5GZ00_HUMAN]	343	38.6	0.818	0.821	0.656	0.649	1.043	3	3	3	3	6.1	3	2.4	3	12.6	3	4.6	3	9.7
Q7Z624	CAMKMT	Calmodulin-lysine N-methyltransferase	Calmodulin-lysine N-methyltransferase OS=Homo sapiens GN=CAMKMT PE=1 SV=2 - [CMKMT_HUMAN]	323	36.1	0.858	1.38	1.617	1.367	1.587	1	1	1	1	NaN	1	NaN	1	NaN	1	NaN	1	NaN
P49069	CAMLG	Calcium signal-modulating cyclophilin ligand	Calcium signal-modulating cyclophilin ligand OS=Homo sapiens GN=CAMLG PE=1 SV=1 - [CAMLG_HUMAN]	296	32.9	0.874	1.121	0.978	1.099	1.145	1	1	1	1	NaN	1	NaN	1	NaN	1	NaN	1	NaN
Q5T5Y3	CAMSAP1	Calmodulin-regulated spectrin-associated protein 1	Calmodulin-regulated spectrin-associated protein 1 OS=Homo sapiens GN=CAMSAP1 PE=1 SV=2 - [CAMP1_HUMAN]	1602	177.9	1.013	0.951	0.854	0.85	1.044	6	7	7	6	12.9	6	19.2	6	21.3	6	23.7	6	7.1
Q86VP6	CAND1	Cullin-associated NEDD8-dissociated protein 1	Cullin-associated NEDD8-dissociated protein 1 OS=Homo sapiens GN=CAND1 PE=1 SV=2 - [CAND1_HUMAN]	1230	136.3	1.027	0.964	0.966	1.008	0.989	45	45	111	109	6.3	108	8.6	108	10.5	109	9.4	108	9.5
Q8WVQ1	CANT1	Soluble calcium-activated nucleotidase 1	Soluble calcium-activated nucleotidase 1 OS=Homo sapiens GN=CANT1 PE=1 SV=1 - [CANT1_HUMAN]	401	44.8	0.962	1.11	1.181	1.154	1.187	9	9	11	11	10.4	11	5.6	11	3.1	11	5.4	11	6
P27824	CANX	Calnexin	Calnexin OS=Homo sapiens GN=CANX PE=1 SV=2 - [CALX_HUMAN]	592	67.5	1.001	0.968	1.054	1.107	0.927	22	22	47	47	9.9	47	11.6	47	15.8	47	12.7	47	14.7
Q01518	CAP1	Adenylyl cyclase-associated protein 1	Adenylyl cyclase-associated protein 1 OS=Homo sapiens GN=CAP1 PE=1 SV=5 - [CAP1_HUMAN]	475	51.9	1.023	0.972	1.091	1.27	1.031	25	25	80	79	5.4	79	10.7	79	13	79	14.2	79	10.7
P40121	CAPG	Macrophage-capping protein	Macrophage-capping protein OS=Homo sapiens GN=CAPG PE=1 SV=2 - [CAPG_HUMAN]	348	38.5	1.027	1.735	3.191	4.2	4.495	11	11	24	24	8.5	24	11.6	24	14.7	24	16.7	24	34.8
P07384	CAPN1	Calpain-1 catalytic subunit	Calpain-1 catalytic subunit OS=Homo sapiens GN=CAPN1 PE=1 SV=1 - [CAN1_HUMAN]	714	81.8	1.01	0.976	1.246	1.46	1.082	31	31	65	65	8.8	65	13.3	65	12.8	65	15.7	65	13.8
Q9Y6W3	CAPN7	Calpain-7	Calpain-7 OS=Homo sapiens GN=CAPN7 PE=1 SV=1 - [CAN7_HUMAN]	813	92.6	0.955	1.398	1.402	1.456	1.604	6	6	6	6	12.8	6	14.4	6	6.8	6	20.6	6	5.3
P04632	CAPNS1	Calpain small subunit 1	Calpain small subunit 1 OS=Homo sapiens GN=CAPNS1 PE=1 SV=1 - [CPNS1_HUMAN]	268	28.3	0.984	1.015	1.213	1.482	1.127	8	8	20	18	8.2	18	9.6	18	6.8	18	8.4	18	7.8
Q14444	CAPRIN1	Caprin-1	Caprin-1 OS=Homo sapiens GN=CAPRIN1 PE=1 SV=2 - [CAPR1_HUMAN]	709	78.3	0.923	1.024	0.801	0.694	1.015	9	9	29	29	3.5	29	8.3	29	11.8	29	15.8	29	7.6
A2RRN2	CAPS2		CAPS2 protein OS=Homo sapiens GN=CAPS2 PE=2 SV=1 - [A2RRN2_HUMAN]	204	23.4	1.204	1.032	1.097	1.238	1.161	1	1	1	1	NaN	1	NaN	1	NaN	1	NaN	1	NaN
P52907	CAPZA1	F-actin-capping protein subunit alpha-1	F-actin-capping protein subunit alpha-1 OS=Homo sapiens GN=CAPZA1 PE=1 SV=3 - [CAZA1_HUMAN]	286	32.9	1.045	0.939	1.037	1.045	0.911	9	11	39	32	6.3	32	8	32	7.2	32	9.7	32	10.5
P47755	CAPZA2	F-actin-capping protein subunit alpha-2	F-actin-capping protein subunit alpha-2 OS=Homo sapiens GN=CAPZA2 PE=1 SV=3 - [CAZA2_HUMAN]	286	32.9	1.018	0.957	1.092	1.18	0.944	8	10	28	21	9.1	21	10.7	21	10.2	21	11.2	21	7.1
B1AK87	CAPZB		Capping protein (Actin filament) muscle Z-line, beta, isoform CRA_a OS=Homo sapiens GN=CAPZB PE=2 SV=1 - [B1AK87_HUMAN]	260	29.3	1.044	0.922	0.98	1.03	0.918	22	22	54	54	7.6	54	9.5	54	11.9	54	9	54	9.4
E9PQW1	CARD16		Caspase recruitment domain-containing protein 16 (Fragment) OS=Homo sapiens GN=CARD16 PE=2 SV=1 - [E9PQW1_HUMAN]	95	10.3	1.117	0.825	0.943	0.937	1.013	1	1	1	1	NaN	1	NaN	1	NaN	1	NaN	1	NaN
Q9Y2V2	CARHSP1	Calcium-regulated heat stable protein 1	Calcium-regulated heat stable protein 1 OS=Homo sapiens GN=CARHSP1 PE=1 SV=2 - [CHSP1_HUMAN]	147	15.9	1.051	0.866	0.988	1.075	1.134	5	5	9	9	7.8	9	9	9	25.4	9	9.1	9	7.2
Q8IW45	CARKD	ATP-dependent (S)-NAD(P)H-hydrate dehydratase	ATP-dependent (S)-NAD(P)H-hydrate dehydratase OS=Homo sapiens GN=CARKD PE=1 SV=1 - [NNRD_HUMAN]	347	36.6	1.011	0.933	1.108	1.417	1.046	5	5	5	5	1.7	5	3.5	5	11.8	5	5.4	5	3.8
Q86X55	CARM1	Histone-arginine methyltransferase CARM1	Histone-arginine methyltransferase CARM1 OS=Homo sapiens GN=CARM1 PE=1 SV=3 - [CARM1_HUMAN]	608	65.8	1.052	0.922	0.872	0.849	0.877	8	8	11	11	3.5	11	5.7	11	3.7	11	7.2	11	6
P49589	CARS	Cysteine--tRNA ligase, cytoplasmic	Cysteine--tRNA ligase, cytoplasmic OS=Homo sapiens GN=CARS PE=1 SV=3 - [SYCC_HUMAN]	748	85.4	1.023	0.901	0.916	0.914	0.802	28	29	51	48	6	48	9.9	48	13	47	10.1	48	15.8
E9PLP0	CARS		Cysteine--tRNA ligase, cytoplasmic OS=Homo sapiens GN=CARS PE=2 SV=1 - [E9PLP0_HUMAN]	128	14.3	1.08	1.117	1.104	1.212	1.253	1	2	3	1	NaN	1	NaN	1	NaN	1	NaN	1	NaN
Q9HA77	CARS2	Probable cysteine--tRNA ligase, mitochondrial	Probable cysteine--tRNA ligase, mitochondrial OS=Homo sapiens GN=CARS2 PE=1 SV=1 - [SYCM_HUMAN]	564	62.2	1.027	0.939	0.941	0.984	0.976	7	7	10	10	3	10	2.1	10	9.1	10	8	10	7.8
O15234	CASC3	Protein CASC3	Protein CASC3 OS=Homo sapiens GN=CASC3 PE=1 SV=2 - [CASC3_HUMAN]	703	76.2	1.065	0.818	0.634	0.785	0.922	4	4	4	4	2.3	4	17.4	4	13.9	4	23.8	4	20.1
Q6P4E1	CASC4	Protein CASC4	Protein CASC4 OS=Homo sapiens GN=CASC4 PE=1 SV=1 - [CASC4_HUMAN]	433	48.8	0.99	1.349	1.346	1.124	1.217	3	3	3	2	2.4	3	41.2	3	45.3	3	35.9	3	42.5
Q8NG31	CASC5	Protein CASC5	Protein CASC5 OS=Homo sapiens GN=CASC5 PE=1 SV=3 - [CASC5_HUMAN]	2342	265.2	1.026	1.496	1.63	1.415	1.408	21	22	24	23	10.4	23	20.1	23	17.6	23	13.9	23	26.8
P42575	CASP2	Caspase-2;Caspase-2 subunit p12;Caspase-2 subunit p13;Caspase-2 subunit p18	Caspase-2 OS=Homo sapiens GN=CASP2 PE=1 SV=2 - [CASP2_HUMAN]	452	50.7	0.905	0.869	0.684	0.68	1.008	12	12	15	15	7.3	15	9.7	15	15.6	15	20.8	15	14.6
P42574	CASP3	Caspase-3;Caspase-3 subunit p12;Caspase-3 subunit p17	Caspase-3 OS=Homo sapiens GN=CASP3 PE=1 SV=2 - [CASP3_HUMAN]	277	31.6	1.046	0.995	1.071	1.157	1.037	5	5	10	10	3.9	10	4.8	10	7.6	10	7.4	10	6.7
P55212	CASP6	Caspase-6;Caspase-6 subunit p11;Caspase-6 subunit p18	Caspase-6 OS=Homo sapiens GN=CASP6 PE=1 SV=2 - [CASP6_HUMAN]	293	33.3	0.989	1.073	1.131	1.146	1.216	8	9	12	11	7.4	11	5.6	11	5.7	11	6.3	11	7.3
P55210	CASP7	Caspase-7;Caspase-7 subunit p11;Caspase-7 subunit p20	Caspase-7 OS=Homo sapiens GN=CASP7 PE=1 SV=1 - [CASP7_HUMAN]	303	34.3	1.057	1.071	1.06	1.254	1.122	10	10	12	12	9.2	12	5.1	12	6.7	12	7.9	12	4.4
Q14790	CASP8	Caspase-8;Caspase-8 subunit p10;Caspase-8 subunit p18	Caspase-8 OS=Homo sapiens GN=CASP8 PE=1 SV=1 - [CASP8_HUMAN]	479	55.4	0.992	1.098	1.386	1.438	1.221	9	9	13	13	5.1	13	14.5	13	19.9	13	18.6	13	16.1
Q9UKL3	CASP8AP2	CASP8-associated protein 2	CASP8-associated protein 2 OS=Homo sapiens GN=CASP8AP2 PE=1 SV=1 - [C8AP2_HUMAN]	1982	222.5	0.99	1.034	0.719	0.529	0.975	1	1	1	1	NaN	1	NaN	1	NaN	1	NaN	1	NaN
P55211	CASP9	Caspase-9;Caspase-9 subunit p10;Caspase-9 subunit p35	Caspase-9 OS=Homo sapiens GN=CASP9 PE=1 SV=3 - [CASP9_HUMAN]	416	46.3	1.023	0.939	0.73	1.009	1.072	2	2	3	2	26	2	22.1	2	65.6	2	64.6	2	21.4
D6RGF7	CAST		DNA-directed RNA polymerase I subunit RPA34 (Fragment) OS=Homo sapiens GN=CAST PE=2 SV=1 - [D6RGF7_HUMAN]	149	15.8	1.104	1.226	1.319	1.418	1.528	2	2	6	6	12.2	6	28.8	6	18.4	6	20.7	6	13.6
P04040	CAT	Catalase	Catalase OS=Homo sapiens GN=CAT PE=1 SV=3 - [CATA_HUMAN]	527	59.7	1	0.97	1.063	0.994	0.991	21	21	38	38	5.1	38	7.2	38	12.5	38	8.2	38	9.1
Q5TGE8	CBFA2T2		Protein CBFA2T2 (Fragment) OS=Homo sapiens GN=CBFA2T2 PE=2 SV=1 - [Q5TGE8_HUMAN]	181	19.3	1.064	0.93	0.64	0.563	1.071	1	1	1	1	NaN	1	NaN	1	NaN	1	NaN	1	NaN
E7EU24	CBFA2T3		Protein CBFA2T3 OS=Homo sapiens GN=CBFA2T3 PE=2 SV=2 - [E7EU24_HUMAN]	615	66.9	0.89	0.574	0.28	0.229	0.702	2	2	3	3	20.5	3	1.6	3	76.9	3	17.5	3	2.4
Q13951	CBFB	Core-binding factor subunit beta	Core-binding factor subunit beta OS=Homo sapiens GN=CBFB PE=1 SV=2 - [PEBB_HUMAN]	182	21.5	1.016	1.047	0.8	0.619	1.208	6	6	12	12	6.9	12	11.5	12	10.4	12	18.4	12	7.9
J3KTD8	CBFB		Core-binding factor subunit beta (Fragment) OS=Homo sapiens GN=CBFB PE=4 SV=1 - [J3KTD8_HUMAN]	60	7	1.091	1.02	0.727	0.56	1.141	1	1	2	2	6.4	2	0.8	2	5	2	4.4	2	3.9
P22681	CBL	E3 ubiquitin-protein ligase CBL	E3 ubiquitin-protein ligase CBL OS=Homo sapiens GN=CBL PE=1 SV=2 - [CBL_HUMAN]	906	99.6	1.034	0.98	1.196	1.391	1.114	13	16	20	16	9.5	16	11.4	16	12.4	16	19	16	12.8
B5MC15	CBLB		Cas-Br-M (Murine) ecotropic retroviral transforming sequence b, isoform CRA_a OS=Homo sapiens GN=CBLB PE=2 SV=1 - [B5MC15_HUMAN]	810	90.7	0.951	1.399	0.956	1.063	1.221	2	5	8	3	5.6	3	4.3	3	58.8	3	6.2	3	12
C9J2P9	CBLL1		E3 ubiquitin-protein ligase Hakai (Fragment) OS=Homo sapiens GN=CBLL1 PE=2 SV=1 - [C9J2P9_HUMAN]	323	36.4	1.038	1.017	0.916	0.888	1.028	4	4	4	4	18	4	17.5	4	11.9	4	16.8	4	16.1
B4DFK7	CBR1		Carbonyl reductase 1, isoform CRA_c OS=Homo sapiens GN=CBR1 PE=2 SV=1 - [B4DFK7_HUMAN]	173	18.7	1.009	1.247	1.236	1.209	0.91	1	1	1	1	NaN	1	NaN	1	NaN	1	NaN	1	NaN
Q8N4T8	CBR4	Carbonyl reductase family member 4	Carbonyl reductase family member 4 OS=Homo sapiens GN=CBR4 PE=1 SV=3 - [CBR4_HUMAN]	237	25.3	1.034	0.984	1.013	1.178	0.905	7	7	7	6	1.5	6	8.8	6	6.5	6	4.7	6	6.7
C9JGY1	CBWD1		COBW domain-containing protein 1 OS=Homo sapiens GN=CBWD1 PE=2 SV=1 - [C9JGY1_HUMAN]	347	38.7	0.972	0.885	0.967	0.736	1.018	3	3	5	5	21.5	5	7.8	5	7.8	5	14.4	5	24.5
J3KS05	CBX1		Chromobox protein homolog 1 (Fragment) OS=Homo sapiens GN=CBX1 PE=4 SV=1 - [J3KS05_HUMAN]	174	20.1	1.065	1.013	1.004	0.952	1.127	8	9	65	23	16.7	24	9.3	24	15.2	24	14.9	24	10.2
Q14781	CBX2	Chromobox protein homolog 2	Chromobox protein homolog 2 OS=Homo sapiens GN=CBX2 PE=1 SV=2 - [CBX2_HUMAN]	532	56	0.79	0.928	0.886	0.773	0.987	3	3	3	3	11.1	3	0.8	3	7.6	3	36.8	3	22.5
Q13185	CBX3	Chromobox protein homolog 3	Chromobox protein homolog 3 OS=Homo sapiens GN=CBX3 PE=1 SV=4 - [CBX3_HUMAN]	183	20.8	1.013	0.967	0.792	0.754	0.854	6	8	61	15	6.5	15	7.2	15	22	15	16.9	15	12.1
O00257	CBX4	E3 SUMO-protein ligase CBX4	E3 SUMO-protein ligase CBX4 OS=Homo sapiens GN=CBX4 PE=1 SV=3 - [CBX4_HUMAN]	560	61.3	0.802	0.88	0.832	0.761	1.041	7	7	9	8	12	8	15.8	8	9.2	8	11.4	8	8
P45973	CBX5	Chromobox protein homolog 5	Chromobox protein homolog 5 OS=Homo sapiens GN=CBX5 PE=1 SV=1 - [CBX5_HUMAN]	191	22.2	1.021	0.989	1.12	1.083	1.104	9	10	45	40	6.8	40	8.2	40	9.6	40	9.3	40	10.8
Q9HC52	CBX8	Chromobox protein homolog 8	Chromobox protein homolog 8 OS=Homo sapiens GN=CBX8 PE=1 SV=3 - [CBX8_HUMAN]	389	43.4	0.981	0.928	0.969	0.94	0.991	7	7	10	10	4.9	10	12.1	10	14.7	10	20.3	10	14.9
Q6P1N0	CC2D1A	Coiled-coil and C2 domain-containing protein 1A	Coiled-coil and C2 domain-containing protein 1A OS=Homo sapiens GN=CC2D1A PE=1 SV=1 - [C2D1A_HUMAN]	951	104	0.934	0.986	0.902	1.034	0.914	8	9	10	9	6.6	9	6.4	9	12.2	9	12.8	9	8.5
Q5T0F9	CC2D1B	Coiled-coil and C2 domain-containing protein 1B	Coiled-coil and C2 domain-containing protein 1B OS=Homo sapiens GN=CC2D1B PE=1 SV=1 - [C2D1B_HUMAN]	858	94.2	0.961	1.127	1.019	0.967	1.236	3	4	4	3	8.5	3	2.2	3	31.1	3	58.8	3	12.2
Q8IX12	CCAR1	Cell division cycle and apoptosis regulator protein 1	Cell division cycle and apoptosis regulator protein 1 OS=Homo sapiens GN=CCAR1 PE=1 SV=2 - [CCAR1_HUMAN]	1150	132.7	1.005	1.093	1.22	1.305	1.065	25	25	42	41	6.8	41	9.3	41	11.4	41	6.6	41	7.1
Q5T278	CCBL1		Kynurenine--oxoglutarate transaminase 1 (Fragment) OS=Homo sapiens GN=CCBL1 PE=2 SV=1 - [Q5T278_HUMAN]	251	27.8	1.002	0.978	1.04	1.109	0.866	2	3	3	2	8	2	9.7	2	17.4	2	2	2	0.8
Q6YP21	CCBL2	Kynurenine--oxoglutarate transaminase 3	Kynurenine--oxoglutarate transaminase 3 OS=Homo sapiens GN=CCBL2 PE=1 SV=1 - [KAT3_HUMAN]	454	51.4	1.068	0.969	1.029	1.09	0.836	16	17	26	25	8.4	25	13.3	25	11.9	25	11.7	25	11.8
Q96ES7	CCDC101	SAGA-associated factor 29 homolog	SAGA-associated factor 29 homolog OS=Homo sapiens GN=CCDC101 PE=1 SV=1 - [SGF29_HUMAN]	293	33.2	1.039	0.851	0.758	0.788	0.887	3	3	3	3	2.6	3	8	3	0.2	3	0.2	3	5
B5MCA1	CCDC104		Coiled-coil domain-containing protein 104 OS=Homo sapiens GN=CCDC104 PE=2 SV=1 - [B5MCA1_HUMAN]	313	36.1	0.944	1.048	1.024	0.861	0.955	6	6	6	6	16.3	6	8.8	6	15.1	6	11.7	6	13
Q9NWR8	CCDC109B	Coiled-coil domain-containing protein 109B	Coiled-coil domain-containing protein 109B OS=Homo sapiens GN=CCDC109B PE=2 SV=2 - [C109B_HUMAN]	336	39.1	1.084	1.137	1.054	1.032	1.159	1	1	1	1	NaN	1	NaN	1	NaN	1	NaN	1	NaN
Q96M91	CCDC11	Coiled-coil domain-containing protein 11	Coiled-coil domain-containing protein 11 OS=Homo sapiens GN=CCDC11 PE=1 SV=2 - [CCD11_HUMAN]	514	61.8	1.053	0.85	1.007	1.104	0.846	1	1	2	1	NaN	1	NaN	1	NaN	1	NaN	1	NaN
D6RDM1	CCDC111		Coiled-coil domain-containing protein 111 OS=Homo sapiens GN=CCDC111 PE=2 SV=1 - [D6RDM1_HUMAN]	559	64.2	1.216	1.605	1.077	1.087	2.032	1	2	3	2	8.9	2	52.4	2	22.8	2	15.9	2	39.9
Q96NT0	CCDC115	Coiled-coil domain-containing protein 115	Coiled-coil domain-containing protein 115 OS=Homo sapiens GN=CCDC115 PE=1 SV=1 - [CC115_HUMAN]	180	19.7	0.931	1.013	1.088	1.143	1.122	2	2	2	2	17.6	2	18.1	2	16.3	2	16.8	2	24
Q8IWD4	CCDC117	Coiled-coil domain-containing protein 117	Coiled-coil domain-containing protein 117 OS=Homo sapiens GN=CCDC117 PE=2 SV=1 - [CC117_HUMAN]	279	30.5	0.934	1.081	1.13	1.082	1.06	5	5	6	6	8.2	6	8.5	6	5.9	6	6.1	6	3.8
Q8WUD4	CCDC12	Coiled-coil domain-containing protein 12	Coiled-coil domain-containing protein 12 OS=Homo sapiens GN=CCDC12 PE=1 SV=1 - [CCD12_HUMAN]	166	19.2	1.061	0.956	0.664	0.595	0.838	9	9	16	16	5.5	16	8.3	16	18.8	16	11.7	16	16.6
Q96CT7	CCDC124	Coiled-coil domain-containing protein 124	Coiled-coil domain-containing protein 124 OS=Homo sapiens GN=CCDC124 PE=1 SV=1 - [CC124_HUMAN]	223	25.8	0.934	1.04	1.009	1.047	0.993	10	10	16	16	7.5	16	14.3	16	11.1	16	10	16	9.5
Q96BQ5	CCDC127	Coiled-coil domain-containing protein 127	Coiled-coil domain-containing protein 127 OS=Homo sapiens GN=CCDC127 PE=1 SV=1 - [CC127_HUMAN]	260	30.8	1.041	10.924	1.244	1.35	10.697	2	2	2	1	NaN	2	22862.7	1	NaN	1	NaN	2	30489.7
Q96JG6	CCDC132	Coiled-coil domain-containing protein 132	Coiled-coil domain-containing protein 132 OS=Homo sapiens GN=CCDC132 PE=1 SV=3 - [CC132_HUMAN]	964	111.1	0.971	0.937	1.048	1.21	0.929	3	3	3	3	0.4	3	14	3	4.2	3	3.8	3	1.4
Q9H6E4	CCDC134	Coiled-coil domain-containing protein 134	Coiled-coil domain-containing protein 134 OS=Homo sapiens GN=CCDC134 PE=1 SV=1 - [CC134_HUMAN]	229	26.5	0.998	1.1	1.099	1.381	0.972	4	4	6	6	4.7	6	1.4	6	9.4	6	4.5	6	3.9
Q6PK04	CCDC137	Coiled-coil domain-containing protein 137	Coiled-coil domain-containing protein 137 OS=Homo sapiens GN=CCDC137 PE=1 SV=1 - [CC137_HUMAN]	289	33.2	0.554	0.331	0.318	0.31	0.49	3	3	3	3	2.7	3	5.4	3	17	3	5.2	3	9.2
Q9P0B6	CCDC167	Coiled-coil domain-containing protein 167	Coiled-coil domain-containing protein 167 OS=Homo sapiens GN=CCDC167 PE=1 SV=2 - [CC167_HUMAN]	97	11.5	1.008	1.536	1.718	1.306	1.448	2	2	3	3	7.1	3	2.3	3	4.5	3	6.9	3	26.1
Q9NQR7	CCDC177	Coiled-coil domain-containing protein 177	Coiled-coil domain-containing protein 177 OS=Homo sapiens GN=CCDC177 PE=2 SV=3 - [CC177_HUMAN]	707	79.7	0.954	1.037	1.233	1.195	1.235	1	1	1	1	NaN	1	NaN	1	NaN	1	NaN	1	NaN
J3KS92	CCDC178		Coiled-coil domain-containing protein 178 OS=Homo sapiens GN=CCDC178 PE=4 SV=1 - [J3KS92_HUMAN]	849	100.1	1.11	0.971	0.821	0.613	0.832	1	2	3	2	7.7	2	9.1	2	10	2	22.3	2	15
O60826	CCDC22	Coiled-coil domain-containing protein 22	Coiled-coil domain-containing protein 22 OS=Homo sapiens GN=CCDC22 PE=1 SV=1 - [CCD22_HUMAN]	627	70.7	0.949	0.967	1.021	0.979	0.957	13	13	17	17	13.8	17	15.1	17	14.5	17	13.1	17	17.2
Q8N300	CCDC23	Coiled-coil domain-containing protein 23	Coiled-coil domain-containing protein 23 OS=Homo sapiens GN=CCDC23 PE=2 SV=1 - [CCD23_HUMAN]	66	7.8	0.899	1.063	0.953	1.102	1.404	3	3	3	3	0.1	3	7.6	3	9.1	3	25.2	3	7.1
Q86WR0	CCDC25	Coiled-coil domain-containing protein 25	Coiled-coil domain-containing protein 25 OS=Homo sapiens GN=CCDC25 PE=1 SV=2 - [CCD25_HUMAN]	208	24.5	1.034	0.929	0.938	0.918	0.83	9	9	10	10	3.2	10	10.8	10	11.1	10	22.5	10	14.3
Q96MW1	CCDC43	Coiled-coil domain-containing protein 43	Coiled-coil domain-containing protein 43 OS=Homo sapiens GN=CCDC43 PE=1 SV=2 - [CCD43_HUMAN]	224	25.2	0.976	0.971	0.932	0.942	1.003	6	6	8	8	5.8	8	8.1	8	15.8	8	6.2	8	16.4
Q96A33	CCDC47	Coiled-coil domain-containing protein 47	Coiled-coil domain-containing protein 47 OS=Homo sapiens GN=CCDC47 PE=1 SV=1 - [CCD47_HUMAN]	483	55.8	1.006	1.117	1.142	1.128	1.001	12	12	22	22	7.7	22	8.1	22	14.6	22	10.9	22	12.1
Q96ER9	CCDC51	Coiled-coil domain-containing protein 51	Coiled-coil domain-containing protein 51 OS=Homo sapiens GN=CCDC51 PE=1 SV=2 - [CCD51_HUMAN]	411	45.8	1.054	0.963	0.888	0.942	0.879	5	5	6	6	7.3	6	2.7	6	21.9	6	9.4	6	7.1
F5GWI9	CCDC53		WASH complex subunit CCDC53 OS=Homo sapiens GN=CCDC53 PE=2 SV=1 - [F5GWI9_HUMAN]	169	18.5	0.988	1.102	1.023	0.99	1.101	1	2	3	2	11.5	2	6.2	2	2.9	2	0.6	2	0.5
C9JQ41	CCDC58		Coiled-coil domain-containing protein 58 OS=Homo sapiens GN=CCDC58 PE=2 SV=1 - [C9JQ41_HUMAN]	130	15.3	1.038	0.891	0.945	0.888	0.777	7	7	15	15	4.4	15	7.3	15	9.4	15	11.6	15	11.2
Q9P031	CCDC59	Thyroid transcription factor 1-associated protein 26	Thyroid transcription factor 1-associated protein 26 OS=Homo sapiens GN=CCDC59 PE=1 SV=2 - [TAP26_HUMAN]	241	28.7	0.739	0.797	0.596	0.548	0.83	3	3	3	3	1.2	3	9	3	9.8	3	13.9	3	11.5
Q16204	CCDC6	Coiled-coil domain-containing protein 6	Coiled-coil domain-containing protein 6 OS=Homo sapiens GN=CCDC6 PE=1 SV=2 - [CCDC6_HUMAN]	474	53.3	0.997	1.001	0.954	0.935	0.984	12	12	16	16	4.4	16	8.8	16	11.4	16	8.2	16	9
Q8IV32	CCDC71	Coiled-coil domain-containing protein 71	Coiled-coil domain-containing protein 71 OS=Homo sapiens GN=CCDC71 PE=2 SV=3 - [CCD71_HUMAN]	467	49.6	1.24	1.177	1.351	1.33	1.32	1	1	1	1	NaN	1	NaN	1	NaN	1	NaN	1	NaN
Q9BR77	CCDC77	Coiled-coil domain-containing protein 77	Coiled-coil domain-containing protein 77 OS=Homo sapiens GN=CCDC77 PE=2 SV=1 - [CCD77_HUMAN]	488	57.5	0.937	0.974	0.828	0.817	0.917	3	3	3	3	11.4	3	7.9	3	9.7	3	5.7	3	1.6
A6NKD9	CCDC85C	Coiled-coil domain-containing protein 85C	Coiled-coil domain-containing protein 85C OS=Homo sapiens GN=CCDC85C PE=1 SV=1 - [CC85C_HUMAN]	419	45.2	0.799	0.965	0.884	0.777	1.254	1	1	1	1	NaN	1	NaN	1	NaN	1	NaN	1	NaN
Q9H6F5	CCDC86	Coiled-coil domain-containing protein 86	Coiled-coil domain-containing protein 86 OS=Homo sapiens GN=CCDC86 PE=1 SV=1 - [CCD86_HUMAN]	360	40.2	0.954	0.977	0.669	0.546	0.928	10	11	14	13	7.8	13	8.2	13	28.1	13	41.9	13	11.5
Q3V6T2	CCDC88A	Girdin	Girdin OS=Homo sapiens GN=CCDC88A PE=1 SV=2 - [GRDN_HUMAN]	1871	215.9	0.978	1.099	1.088	1.199	1.333	17	18	19	18	5.5	18	8.5	18	6.1	18	11	18	9.6
Q9P219	CCDC88C	Protein Daple	Protein Daple OS=Homo sapiens GN=CCDC88C PE=1 SV=3 - [DAPLE_HUMAN]	2028	228.1	0.972	0.959	0.982	0.994	1.025	6	7	9	8	9.9	8	8.2	8	15.4	8	12.8	8	8.6
Q9Y3X0	CCDC9	Coiled-coil domain-containing protein 9	Coiled-coil domain-containing protein 9 OS=Homo sapiens GN=CCDC9 PE=1 SV=1 - [CCDC9_HUMAN]	531	59.7	0.752	1.026	0.55	0.622	1.125	1	1	1	1	NaN	1	NaN	1	NaN	1	NaN	1	NaN
Q9GZT6	CCDC90B	Coiled-coil domain-containing protein 90B, mitochondrial	Coiled-coil domain-containing protein 90B, mitochondrial OS=Homo sapiens GN=CCDC90B PE=1 SV=2 - [CC90B_HUMAN]	254	29.5	0.968	1.009	1.232	1.392	1.124	4	4	4	4	8.4	4	14.2	4	15.4	4	15.4	4	16.5
F5GWR1	CCDC91		Coiled-coil domain-containing protein 91 (Fragment) OS=Homo sapiens GN=CCDC91 PE=2 SV=1 - [F5GWR1_HUMAN]	120	13.9	0.855	0.922	0.855	0.902	0.915	3	3	3	3	1.2	3	9	3	15.1	3	7.2	3	1.2
F8W9X7	CCDC93		Coiled-coil domain-containing protein 93 OS=Homo sapiens GN=CCDC93 PE=2 SV=1 - [F8W9X7_HUMAN]	630	73	1.003	0.938	0.923	0.954	0.974	14	15	16	15	9.4	15	9	15	5	15	7.1	15	12.5
Q9BW85	CCDC94	Coiled-coil domain-containing protein 94	Coiled-coil domain-containing protein 94 OS=Homo sapiens GN=CCDC94 PE=1 SV=1 - [CCD94_HUMAN]	323	37.1	1.002	1.084	0.889	0.711	0.906	5	5	8	7	10.2	8	13.5	7	7.1	7	14.1	8	10.2
Q96F63	CCDC97	Coiled-coil domain-containing protein 97	Coiled-coil domain-containing protein 97 OS=Homo sapiens GN=CCDC97 PE=1 SV=1 - [CCD97_HUMAN]	343	38.9	0.989	1.037	1.074	1.023	0.962	7	7	12	12	7.3	12	5.7	12	11.3	12	12.5	12	10
C9JUH3	CCM2		Malcavernin OS=Homo sapiens GN=CCM2 PE=2 SV=1 - [C9JUH3_HUMAN]	347	38.8	1.136	1.013	1.181	1.261	1.222	3	3	3	3	17.9	3	1.2	3	13.8	3	3.4	3	1.7
P20248	CCNA2	Cyclin-A2	Cyclin-A2 OS=Homo sapiens GN=CCNA2 PE=1 SV=2 - [CCNA2_HUMAN]	432	48.5	1.145	1.584	1.462	1.216	1.186	8	8	8	8	17.6	8	21.7	8	27.4	8	19.4	8	22.8
P14635	CCNB1	G2/mitotic-specific cyclin-B1	G2/mitotic-specific cyclin-B1 OS=Homo sapiens GN=CCNB1 PE=1 SV=1 - [CCNB1_HUMAN]	433	48.3	1.243	1.535	2.341	2.313	1.234	10	10	19	19	10.2	19	16.8	19	18.1	19	18.4	19	18.2
O95067	CCNB2	G2/mitotic-specific cyclin-B2	G2/mitotic-specific cyclin-B2 OS=Homo sapiens GN=CCNB2 PE=1 SV=1 - [CCNB2_HUMAN]	398	45.3	1.145	1.27	1.598	1.461	1.039	9	9	9	9	10.2	9	28.6	9	30.9	9	31.1	9	21.8
H0YBQ5	CCNC		Cyclin-C (Fragment) OS=Homo sapiens GN=CCNC PE=2 SV=1 - [H0YBQ5_HUMAN]	228	26.5	1.043	0.946	0.956	1.003	1.017	1	2	4	2	6.9	2	10	2	16.6	2	22.4	2	11.6
D6RIX2	CCND3		G1/S-specific cyclin-D3 (Fragment) OS=Homo sapiens GN=CCND3 PE=2 SV=1 - [D6RIX2_HUMAN]	118	13.6	1.044	0.915	0.801	0.909	1.003	1	1	1	1	NaN	1	NaN	1	NaN	1	NaN	1	NaN
O95273	CCNDBP1	Cyclin-D1-binding protein 1	Cyclin-D1-binding protein 1 OS=Homo sapiens GN=CCNDBP1 PE=1 SV=2 - [CCDB1_HUMAN]	360	40.2	1.068	1.436	1.145	1.172	1.373	3	3	3	3	0.2	3	10.5	3	33.4	3	17.2	3	19.6
P51946	CCNH	Cyclin-H	Cyclin-H OS=Homo sapiens GN=CCNH PE=1 SV=1 - [CCNH_HUMAN]	323	37.6	0.969	1.153	1.044	0.952	1.008	5	5	6	6	13.6	6	5.2	6	9.6	6	13.6	6	5.9
G3V5E1	CCNK		Cyclin-K OS=Homo sapiens GN=CCNK PE=2 SV=1 - [G3V5E1_HUMAN]	378	43.4	1.039	0.915	0.803	0.855	0.986	5	5	7	7	5.1	7	4	7	1.5	7	9.2	7	2.7
C9JPL0	CCNL1		DNA replication licensing factor MCM2 OS=Homo sapiens GN=CCNL1 PE=2 SV=1 - [C9JPL0_HUMAN]	428	47.8	1.018	0.923	0.823	0.732	0.768	2	2	2	2	9.8	2	16.5	2	24.8	2	40.4	2	37.5
O60563	CCNT1	Cyclin-T1	Cyclin-T1 OS=Homo sapiens GN=CCNT1 PE=1 SV=1 - [CCNT1_HUMAN]	726	80.6	0.893	0.759	0.848	0.823	0.818	4	4	5	5	13	5	13.7	5	11.7	5	40	5	25.1
B4DH21	CCNT2		Cyclin-T2 OS=Homo sapiens GN=CCNT2 PE=2 SV=1 - [B4DH21_HUMAN]	488	53.7	1.068	1.63	1.728	1.787	1.764	1	1	4	4	8.4	4	2.8	4	23.8	4	6.4	4	5.5
Q8ND76	CCNY	Cyclin-Y	Cyclin-Y OS=Homo sapiens GN=CCNY PE=1 SV=2 - [CCNY_HUMAN]	341	39.3	1.037	0.969	1.044	1.113	1.116	2	2	4	4	3.7	4	5	4	7.6	4	3.2	4	5.6
O43303	CCP110	Centriolar coiled-coil protein of 110 kDa	Centriolar coiled-coil protein of 110 kDa OS=Homo sapiens GN=CCP110 PE=1 SV=3 - [CP110_HUMAN]	1012	113.4	0.924	1.083	0.688	0.483	0.94	4	4	4	4	16.9	4	8.1	4	8.3	4	25.6	4	9.4
P51679	CCR4	C-C chemokine receptor type 4	C-C chemokine receptor type 4 OS=Homo sapiens GN=CCR4 PE=1 SV=1 - [CCR4_HUMAN]	360	41.4	1.066	1.049	1.026	1.217	1.14	1	1	1	1	NaN	1	NaN	1	NaN	1	NaN	1	NaN
Q9UK39	CCRN4L	Nocturnin	Nocturnin OS=Homo sapiens GN=CCRN4L PE=2 SV=2 - [NOCT_HUMAN]	431	48.2	1.013	0.906	0.717	0.725	0.787	2	2	2	2	5.8	2	15.5	2	49	2	46.9	2	17.2
J3KNF4	CCS		Copper chaperone for superoxide dismutase OS=Homo sapiens GN=CCS PE=4 SV=1 - [J3KNF4_HUMAN]	255	27.1	1.032	0.858	1.039	1.116	0.971	6	6	6	6	4.4	6	15.1	6	12	6	5.8	6	13.9
E7EUW0	CCSER1		Serine-rich coiled-coil domain-containing protein 1 OS=Homo sapiens GN=CCSER1 PE=2 SV=1 - [E7EUW0_HUMAN]	663	72.8	0.935	1.014	0.966	1.011	1.008	1	1	1	1	NaN	1	NaN	1	NaN	1	NaN	1	NaN
P78371	CCT2	T-complex protein 1 subunit beta	T-complex protein 1 subunit beta OS=Homo sapiens GN=CCT2 PE=1 SV=4 - [TCPB_HUMAN]	535	57.5	0.984	0.989	0.955	0.921	0.93	30	30	141	141	8.7	140	9.6	140	13.6	141	9.9	140	12.4
P49368	CCT3	T-complex protein 1 subunit gamma	T-complex protein 1 subunit gamma OS=Homo sapiens GN=CCT3 PE=1 SV=4 - [TCPG_HUMAN]	545	60.5	0.981	0.956	0.962	0.934	0.892	30	30	111	107	7.5	107	12.7	107	13.6	107	10.4	107	13.6
P50991	CCT4	T-complex protein 1 subunit delta	T-complex protein 1 subunit delta OS=Homo sapiens GN=CCT4 PE=1 SV=4 - [TCPD_HUMAN]	539	57.9	0.975	1.034	0.964	0.903	0.937	23	24	82	75	9.1	75	12.9	75	12.4	75	9.9	75	10.6
P48643	CCT5	T-complex protein 1 subunit epsilon	T-complex protein 1 subunit epsilon OS=Homo sapiens GN=CCT5 PE=1 SV=1 - [TCPE_HUMAN]	541	59.6	0.997	0.968	0.944	0.957	0.933	30	31	112	101	8.8	101	8.4	101	14	100	12.7	101	11.3
B4DPJ8	CCT6A		T-complex protein 1 subunit zeta OS=Homo sapiens GN=CCT6A PE=2 SV=1 - [B4DPJ8_HUMAN]	500	54.8	0.998	0.934	0.999	0.999	0.901	21	21	64	63	6	63	9.8	63	10.3	63	11.5	63	13.9
Q99832	CCT7	T-complex protein 1 subunit eta	T-complex protein 1 subunit eta OS=Homo sapiens GN=CCT7 PE=1 SV=2 - [TCPH_HUMAN]	543	59.3	0.993	0.962	0.923	0.922	0.889	28	28	112	106	7.4	106	9.4	106	13.4	106	11.5	106	10.1
P50990	CCT8	T-complex protein 1 subunit theta	T-complex protein 1 subunit theta OS=Homo sapiens GN=CCT8 PE=1 SV=4 - [TCPQ_HUMAN]	548	59.6	0.989	0.961	0.891	0.847	0.902	33	33	125	125	8.5	125	12	125	12.6	125	10.5	125	12.3
P86790	CCZ1B	Vacuolar fusion protein CCZ1 homolog B	Vacuolar fusion protein CCZ1 homolog B OS=Homo sapiens GN=CCZ1B PE=1 SV=1 - [CCZ1B_HUMAN]	482	55.8	0.996	0.981	0.827	0.899	1.008	6	6	8	8	7	8	10.3	8	6.1	8	11.7	8	8
E9PRJ3	CD151		CD151 antigen (Fragment) OS=Homo sapiens GN=CD151 PE=2 SV=1 - [E9PRJ3_HUMAN]	178	19.8	1.044	1.04	0.8	1.153	1.444	1	1	1	1	NaN	1	NaN	1	NaN	1	NaN	1	NaN
J3QR77	CD226		CD226 antigen OS=Homo sapiens GN=CD226 PE=4 SV=1 - [J3QR77_HUMAN]	181	21	0.76	0.835	0.58	0.709	1.063	1	1	1	1	NaN	1	NaN	1	NaN	1	NaN	1	NaN
P20963	CD247	T-cell surface glycoprotein CD3 zeta chain	T-cell surface glycoprotein CD3 zeta chain OS=Homo sapiens GN=CD247 PE=1 SV=2 - [CD3Z_HUMAN]	164	18.7	0.991	0.974	1.027	1.02	1.147	3	3	5	5	5.4	5	15.6	5	20.9	5	18.2	5	6.6
Q9Y5K6	CD2AP	CD2-associated protein	CD2-associated protein OS=Homo sapiens GN=CD2AP PE=1 SV=1 - [CD2AP_HUMAN]	639	71.4	1	1.009	0.993	1	1.01	20	20	31	31	8.3	31	9	31	10	31	9.6	31	4.8
O95400	CD2BP2	CD2 antigen cytoplasmic tail-binding protein 2	CD2 antigen cytoplasmic tail-binding protein 2 OS=Homo sapiens GN=CD2BP2 PE=1 SV=1 - [CD2B2_HUMAN]	341	37.6	0.953	1.093	1.1	1.179	1.125	7	7	7	7	2.3	7	1	7	8.7	7	2.5	7	5.2
Q9NPF0	CD320	CD320 antigen	CD320 antigen OS=Homo sapiens GN=CD320 PE=1 SV=1 - [CD320_HUMAN]	282	29	0.978	0.811	0.374	0.526	0.881	3	3	3	3	0.6	3	13.7	3	3.1	3	3.4	3	25.4
M0QZP6	CD37		Leukocyte antigen CD37 (Fragment) OS=Homo sapiens GN=CD37 PE=4 SV=1 - [M0QZP6_HUMAN]	254	27.7	0.887	1.155	0.575	0.581	1.001	1	1	1	1	NaN	1	NaN	1	NaN	1	NaN	1	NaN
P28907	CD38	ADP-ribosyl cyclase 1	ADP-ribosyl cyclase 1 OS=Homo sapiens GN=CD38 PE=1 SV=2 - [CD38_HUMAN]	300	34.3	1.05	1.18	1.078	0.866	1.678	9	9	13	13	4.4	13	9.3	13	8.2	13	9.8	13	15.4
P04234	CD3D	T-cell surface glycoprotein CD3 delta chain	T-cell surface glycoprotein CD3 delta chain OS=Homo sapiens GN=CD3D PE=1 SV=1 - [CD3D_HUMAN]	171	18.9	1.096	1.027	1.011	0.87	1.327	6	6	8	8	4.6	8	2.9	8	12	8	7.1	8	10
E9PSH8	CD3E		T-cell surface glycoprotein CD3 epsilon chain OS=Homo sapiens GN=CD3E PE=2 SV=1 - [E9PSH8_HUMAN]	201	22.5	0.996	1.076	1.073	1.008	1.271	6	6	13	13	9.5	13	11.5	13	7.2	13	10.4	13	11
O15446	CD3EAP	DNA-directed RNA polymerase I subunit RPA34	DNA-directed RNA polymerase I subunit RPA34 OS=Homo sapiens GN=CD3EAP PE=1 SV=1 - [RPA34_HUMAN]	510	55	0.964	0.939	0.778	0.671	0.875	9	9	11	11	7.3	11	9.7	11	12.5	11	13.3	11	9.9
P09693	CD3G	T-cell surface glycoprotein CD3 gamma chain	T-cell surface glycoprotein CD3 gamma chain OS=Homo sapiens GN=CD3G PE=1 SV=1 - [CD3G_HUMAN]	182	20.5	1.04	1.202	0.925	0.792	1.195	5	5	8	8	13.3	8	13	8	16.3	8	16.6	8	10.7
P01730	CD4	T-cell surface glycoprotein CD4	T-cell surface glycoprotein CD4 OS=Homo sapiens GN=CD4 PE=1 SV=1 - [CD4_HUMAN]	458	51.1	1.054	0.579	0.161	0.179	1.133	6	6	12	12	5.6	12	12.5	12	30.6	12	38.2	12	11.1
H0YD13	CD44		CD44 antigen OS=Homo sapiens GN=CD44 PE=2 SV=2 - [H0YD13_HUMAN]	206	22.7	0.968	1.162	0.686	0.652	1.2	5	5	10	8	5.7	8	8	8	11.1	8	18.5	8	11.3
P15529	CD46	Membrane cofactor protein	Membrane cofactor protein OS=Homo sapiens GN=CD46 PE=1 SV=3 - [MCP_HUMAN]	392	43.7	0.977	0.952	0.623	0.589	0.951	1	1	1	1	NaN	1	NaN	1	NaN	1	NaN	1	NaN
Q08722	CD47	Leukocyte surface antigen CD47	Leukocyte surface antigen CD47 OS=Homo sapiens GN=CD47 PE=1 SV=1 - [CD47_HUMAN]	323	35.2	1.044	1.099	0.801	0.909	1.003	2	2	4	3	1.2	3	9.2	3	15.9	3	38.2	3	7.3
P06127	CD5	T-cell surface glycoprotein CD5	T-cell surface glycoprotein CD5 OS=Homo sapiens GN=CD5 PE=1 SV=2 - [CD5_HUMAN]	495	54.5	1.062	1.003	0.753	0.58	1.245	3	3	3	3	0.9	3	9	3	18	3	10.2	3	16.8
H3BLV0	CD55		Complement decay-accelerating factor (Fragment) OS=Homo sapiens GN=CD55 PE=4 SV=1 - [H3BLV0_HUMAN]	326	35.8	0.994	1.128	0.676	0.576	1.13	2	2	2	2	4.6	2	10.9	2	11.1	2	9.1	2	13.9
E9PNW4	CD59		CD59 glycoprotein OS=Homo sapiens GN=CD59 PE=2 SV=1 - [E9PNW4_HUMAN]	108	12	1.076	1.255	1.097	0.96	1.677	4	4	8	8	4	8	5.2	8	14.4	8	9.5	8	11.2
J3QLM0	CD7		T-cell antigen CD7 OS=Homo sapiens GN=CD7 PE=4 SV=1 - [J3QLM0_HUMAN]	221	23	1.207	1.446	1.93	1.99	2.884	1	1	1	1	NaN	1	NaN	1	NaN	1	NaN	1	NaN
E9PM31	CD81		CD81 antigen (Fragment) OS=Homo sapiens GN=CD81 PE=2 SV=1 - [E9PM31_HUMAN]	93	10.1	0.918	1.073	0.449	0.381	1.04	1	1	3	3	1	3	1.5	3	7.1	3	3.7	3	4.8
P27701	CD82	CD82 antigen	CD82 antigen OS=Homo sapiens GN=CD82 PE=1 SV=1 - [CD82_HUMAN]	267	29.6	1.008	1.284	0.609	0.59	1.233	4	4	5	5	11	5	7	5	7.6	5	6.7	5	17.6
Q9UIB8	CD84	SLAM family member 5	SLAM family member 5 OS=Homo sapiens GN=CD84 PE=1 SV=1 - [SLAF5_HUMAN]	345	38.8	0.841	1.569	0.808	1.068	1.289	1	1	1	1	NaN	1	NaN	1	NaN	1	NaN	1	NaN
P48960	CD97	CD97 antigen;CD97 antigen subunit alpha;CD97 antigen subunit beta	CD97 antigen OS=Homo sapiens GN=CD97 PE=1 SV=4 - [CD97_HUMAN]	835	91.8	0.905	1.512	1.759	1.802	2.105	3	3	4	4	11.2	4	21.8	4	4	4	10	4	17.6
P14209	CD99	CD99 antigen	CD99 antigen OS=Homo sapiens GN=CD99 PE=1 SV=1 - [CD99_HUMAN]	185	18.8	0.878	1.146	1.263	1.105	1.533	1	1	1	1	NaN	1	NaN	1	NaN	1	NaN	1	NaN
Q8TCZ2	CD99L2	CD99 antigen-like protein 2	CD99 antigen-like protein 2 OS=Homo sapiens GN=CD99L2 PE=1 SV=1 - [C99L2_HUMAN]	262	28	1.04	1.192	1.098	1.213	1.67	1	1	1	1	NaN	1	NaN	1	NaN	1	NaN	1	NaN
Q8IWY9	CDAN1	Codanin-1	Codanin-1 OS=Homo sapiens GN=CDAN1 PE=1 SV=4 - [CDAN1_HUMAN]	1227	134	1.094	1.074	1.233	1.474	1.166	5	5	5	5	13.1	5	11.7	5	12.1	5	19.5	5	10
O75794	CDC123	Cell division cycle protein 123 homolog	Cell division cycle protein 123 homolog OS=Homo sapiens GN=CDC123 PE=1 SV=1 - [CD123_HUMAN]	336	39.1	0.872	0.832	0.525	0.555	0.829	5	5	8	8	8	8	6.6	8	15.5	8	20.6	8	4.1
Q13042	CDC16	Cell division cycle protein 16 homolog	Cell division cycle protein 16 homolog OS=Homo sapiens GN=CDC16 PE=1 SV=2 - [CDC16_HUMAN]	620	71.6	1.017	0.997	1.057	1.056	1.152	5	5	8	8	4.3	8	11.3	8	5.9	8	15.8	8	7.4
Q12834	CDC20	Cell division cycle protein 20 homolog	Cell division cycle protein 20 homolog OS=Homo sapiens GN=CDC20 PE=1 SV=2 - [CDC20_HUMAN]	499	54.7	0.995	1.371	1.289	1.137	0.878	7	7	11	11	14	11	12.2	11	11.4	11	14	11	6.6
Q9UJX2	CDC23	Cell division cycle protein 23 homolog	Cell division cycle protein 23 homolog OS=Homo sapiens GN=CDC23 PE=1 SV=3 - [CDC23_HUMAN]	597	68.8	1.064	1.035	0.926	0.941	1.054	8	8	10	10	4.6	10	14.6	10	5	10	8.8	10	10.1
G8JLH2	CDC25B		M-phase inducer phosphatase 2 OS=Homo sapiens GN=CDC25B PE=2 SV=1 - [G8JLH2_HUMAN]	489	55.9	1.049	1.267	1.585	1.988	1.028	3	3	3	3	1.5	3	2.8	3	37.1	3	27	3	2.9
P30307	CDC25C	M-phase inducer phosphatase 3	M-phase inducer phosphatase 3 OS=Homo sapiens GN=CDC25C PE=1 SV=2 - [MPIP3_HUMAN]	473	53.3	1.031	0.973	0.99	1.202	0.899	2	2	2	2	6.7	2	9.7	2	21.9	2	12.7	2	12.7
Q8NHZ8	CDC26	Anaphase-promoting complex subunit CDC26	Anaphase-promoting complex subunit CDC26 OS=Homo sapiens GN=CDC26 PE=1 SV=1 - [CDC26_HUMAN]	85	9.8	0.838	1.033	0.694	0.78	0.987	2	2	3	3	2.8	3	2.2	3	23.5	3	2.8	3	11.5
B4DL80	CDC27		Cell division cycle protein 27 homolog OS=Homo sapiens GN=CDC27 PE=2 SV=1 - [B4DL80_HUMAN]	763	84.8	1.003	1.193	1.142	1.066	1.153	11	11	16	16	5.4	16	10.2	16	16.4	16	12.1	16	6.4
P49427	CDC34	Ubiquitin-conjugating enzyme E2 R1	Ubiquitin-conjugating enzyme E2 R1 OS=Homo sapiens GN=CDC34 PE=1 SV=2 - [UB2R1_HUMAN]	236	26.7	0.853	1.066	1.084	1.194	1.157	3	3	3	3	1.6	3	5.1	3	8.9	3	19.9	3	13.4
Q16543	CDC37	Hsp90 co-chaperone Cdc37	Hsp90 co-chaperone Cdc37 OS=Homo sapiens GN=CDC37 PE=1 SV=1 - [CDC37_HUMAN]	378	44.4	1	0.989	0.975	1.038	1.019	8	13	39	25	5.6	25	15.4	25	10.8	25	10.2	25	15.2
K7EL68	CDC37		Hsp90 co-chaperone Cdc37 (Fragment) OS=Homo sapiens GN=CDC37 PE=4 SV=1 - [K7EL68_HUMAN]	184	21.1	1.124	1.074	1.197	1.185	1.171	1	6	15	1	NaN	1	NaN	1	NaN	1	NaN	1	NaN
B1AL69	CDC37L1		Hsp90 co-chaperone Cdc37-like 1 OS=Homo sapiens GN=CDC37L1 PE=2 SV=1 - [B1AL69_HUMAN]	308	35.6	0.94	1.411	1.152	1.524	1.582	1	1	1	1	NaN	1	NaN	1	NaN	1	NaN	1	NaN
O60508	CDC40	Pre-mRNA-processing factor 17	Pre-mRNA-processing factor 17 OS=Homo sapiens GN=CDC40 PE=1 SV=1 - [PRP17_HUMAN]	579	65.5	1.011	1.019	1.009	0.914	0.902	18	18	25	25	9	25	7.6	25	9.5	25	6.1	25	10.1
P60953	CDC42	Cell division control protein 42 homolog	Cell division control protein 42 homolog OS=Homo sapiens GN=CDC42 PE=1 SV=2 - [CDC42_HUMAN]	191	21.2	1.026	0.967	0.871	0.922	0.944	5	6	19	12	3.6	12	8.8	12	7	12	13.7	12	15.6
O75419	CDC45	Cell division control protein 45 homolog	Cell division control protein 45 homolog OS=Homo sapiens GN=CDC45 PE=1 SV=1 - [CDC45_HUMAN]	566	65.5	0.987	1.273	1.167	1.007	1.287	3	3	3	3	1.9	3	0.9	3	24.2	3	7.2	3	0.9
Q99459	CDC5L	Cell division cycle 5-like protein	Cell division cycle 5-like protein OS=Homo sapiens GN=CDC5L PE=1 SV=2 - [CDC5L_HUMAN]	802	92.2	1.031	1.006	0.992	0.921	0.978	26	26	42	42	8.9	42	9.3	42	13.6	42	12.3	42	9.6
J3KTI7	CDC6		Cell division control protein 6 homolog (Fragment) OS=Homo sapiens GN=CDC6 PE=4 SV=1 - [J3KTI7_HUMAN]	100	11	1.388	0.738	4.42	5.436	0.702	1	1	1	1	NaN	1	NaN	1	NaN	1	NaN	1	NaN
J3KQS2	CDC7		Cell division cycle 7-related protein kinase OS=Homo sapiens GN=CDC7 PE=4 SV=1 - [J3KQS2_HUMAN]	546	60.7	0.59	0.785	1	1.068	0.807	1	1	1	1	NaN	1	NaN	1	NaN	1	NaN	1	NaN
Q6P1J9	CDC73	Parafibromin	Parafibromin OS=Homo sapiens GN=CDC73 PE=1 SV=1 - [CDC73_HUMAN]	531	60.5	0.97	1.067	0.939	0.903	1.022	17	17	27	27	4.9	27	10.7	27	9.7	27	10.5	27	9.2
E9PEI0	CDCA2		Cell division cycle-associated protein 2 OS=Homo sapiens GN=CDCA2 PE=2 SV=1 - [E9PEI0_HUMAN]	1008	110.9	0.687	0.598	0.774	0.757	0.664	5	5	7	7	18.1	7	23.1	7	18.9	7	19.8	7	18.1
Q99618	CDCA3	Cell division cycle-associated protein 3	Cell division cycle-associated protein 3 OS=Homo sapiens GN=CDCA3 PE=1 SV=1 - [CDCA3_HUMAN]	268	29	1.007	1.797	2.021	1.889	1.321	10	10	15	15	9.1	15	24.6	15	34.3	15	32.7	15	21.8
Q9BXL8	CDCA4	Cell division cycle-associated protein 4	Cell division cycle-associated protein 4 OS=Homo sapiens GN=CDCA4 PE=1 SV=1 - [CDCA4_HUMAN]	241	26.1	1.107	1.099	0.926	0.391	1.057	1	1	1	1	NaN	1	NaN	1	NaN	1	NaN	1	NaN
Q96FF9	CDCA5	Sororin	Sororin OS=Homo sapiens GN=CDCA5 PE=1 SV=1 - [CDCA5_HUMAN]	252	27.6	0.753	0.483	0.564	0.563	0.638	4	4	6	6	7.9	6	10.7	6	4.2	6	16.8	6	5.1
B4DLP8	CDCA7		Cell division cycle-associated protein 7 OS=Homo sapiens GN=CDCA7 PE=2 SV=1 - [B4DLP8_HUMAN]	329	37.8	0.864	1.222	0.748	0.81	1.156	2	2	2	2	48.6	2	6.9	2	48.9	2	40.9	2	18.9
Q96GN5	CDCA7L	Cell division cycle-associated 7-like protein	Cell division cycle-associated 7-like protein OS=Homo sapiens GN=CDCA7L PE=1 SV=2 - [CDA7L_HUMAN]	454	52.2	0.908	0.797	0.634	0.591	1.063	2	2	2	2	1.7	2	5	2	12.8	2	11.5	2	7.4
Q53HL2	CDCA8	Borealin	Borealin OS=Homo sapiens GN=CDCA8 PE=1 SV=2 - [BOREA_HUMAN]	280	31.3	1.192	1.321	1.682	1.626	1.073	11	11	26	26	11.9	26	15.9	26	13.8	26	22.1	26	14.4
A8MWK3	CDH2		Cadherin-2 OS=Homo sapiens GN=CDH2 PE=2 SV=1 - [A8MWK3_HUMAN]	875	97	0.995	1.246	1.543	1.661	1.404	1	1	2	2	4.2	2	21.4	2	44.1	2	38.5	2	13.4
H3BUR9	CDIPT		CDP-diacylglycerol--inositol 3-phosphatidyltransferase OS=Homo sapiens GN=CDIPT PE=2 SV=1 - [H3BUR9_HUMAN]	157	17.3	1.06	0.985	1.081	1.357	1.002	1	1	1	1	NaN	1	NaN	1	NaN	1	NaN	1	NaN
P06493	CDK1	Cyclin-dependent kinase 1	Cyclin-dependent kinase 1 OS=Homo sapiens GN=CDK1 PE=1 SV=3 - [CDK1_HUMAN]	297	34.1	0.994	1.194	1.462	1.469	1.288	10	13	32	28	7.5	28	11.8	28	9.1	28	14	28	12.6
P21127	CDK11B	Cyclin-dependent kinase 11B	Cyclin-dependent kinase 11B OS=Homo sapiens GN=CDK11B PE=1 SV=3 - [CD11B_HUMAN]	795	92.7	0.995	1.004	1.035	1.054	0.983	15	15	20	20	5.3	20	3.4	20	9.4	20	6.6	20	4.8
Q9NYV4	CDK12	Cyclin-dependent kinase 12	Cyclin-dependent kinase 12 OS=Homo sapiens GN=CDK12 PE=1 SV=2 - [CDK12_HUMAN]	1490	164.1	1.034	1.07	0.952	0.948	1.052	7	10	17	12	8.3	12	11.9	12	14	12	9.5	12	7.8
Q00536	CDK16	Cyclin-dependent kinase 16	Cyclin-dependent kinase 16 OS=Homo sapiens GN=CDK16 PE=1 SV=1 - [CDK16_HUMAN]	496	55.7	0.897	0.828	1.054	1.007	0.884	2	4	5	2	18.3	2	31.8	2	3.4	2	16	2	12.8
Q00537	CDK17	Cyclin-dependent kinase 17	Cyclin-dependent kinase 17 OS=Homo sapiens GN=CDK17 PE=1 SV=2 - [CDK17_HUMAN]	523	59.5	0.898	1.408	2.283	3.153	1.012	4	6	7	4	6.6	4	4.3	4	6.2	4	22.7	4	6.5
Q9BWU1	CDK19	Cyclin-dependent kinase 19	Cyclin-dependent kinase 19 OS=Homo sapiens GN=CDK19 PE=1 SV=1 - [CDK19_HUMAN]	502	56.8	1.133	1.119	1.822	1.761	1.788	1	5	5	1	NaN	1	NaN	1	NaN	1	NaN	1	NaN
P24941	CDK2	Cyclin-dependent kinase 2	Cyclin-dependent kinase 2 OS=Homo sapiens GN=CDK2 PE=1 SV=2 - [CDK2_HUMAN]	298	33.9	0.999	1.138	1.27	1.17	1.166	8	11	23	19	6.4	19	4.6	19	12.9	19	12.1	19	9.2
F5GZF0	CDK2AP1		Cyclin-dependent kinase 2-associated protein 1 (Fragment) OS=Homo sapiens GN=CDK2AP1 PE=2 SV=1 - [F5GZF0_HUMAN]	66	7.2	0.962	0.952	0.911	0.886	0.93	2	2	2	2	15.7	2	14.7	2	10.4	2	20.1	2	29.8
F8VYH9	CDK4		Cyclin-dependent kinase 4 (Fragment) OS=Homo sapiens GN=CDK4 PE=2 SV=1 - [F8VYH9_HUMAN]	170	18.7	0.757	0.711	0.337	0.352	0.93	3	4	5	3	1.5	3	1.5	3	3.8	3	0.1	3	2.1
Q00535	CDK5	Cyclin-dependent kinase 5	Cyclin-dependent kinase 5 OS=Homo sapiens GN=CDK5 PE=1 SV=3 - [CDK5_HUMAN]	292	33.3	0.973	1.166	1.339	1.539	1.397	6	7	12	10	11.8	10	12.1	10	8.3	10	19.2	10	9.2
Q96SZ6	CDK5RAP1	CDK5 regulatory subunit-associated protein 1	CDK5 regulatory subunit-associated protein 1 OS=Homo sapiens GN=CDK5RAP1 PE=1 SV=2 - [CK5P1_HUMAN]	601	67.6	0.896	1.149	0.917	0.638	0.923	4	4	5	5	10.6	5	19.4	5	17.4	5	16.4	5	2.7
Q96SN8	CDK5RAP2	CDK5 regulatory subunit-associated protein 2	CDK5 regulatory subunit-associated protein 2 OS=Homo sapiens GN=CDK5RAP2 PE=1 SV=5 - [CK5P2_HUMAN]	1893	214.9	0.941	1.374	0.951	0.841	1.249	2	2	3	3	20.4	3	9.7	3	6.1	3	0.7	3	12.7
Q96JB5	CDK5RAP3	CDK5 regulatory subunit-associated protein 3	CDK5 regulatory subunit-associated protein 3 OS=Homo sapiens GN=CDK5RAP3 PE=1 SV=2 - [CK5P3_HUMAN]	506	56.9	1.018	0.999	1.088	1.113	1.01	14	15	26	22	8.3	22	8.6	22	5.6	22	18.4	22	13.1
Q00534	CDK6	Cyclin-dependent kinase 6	Cyclin-dependent kinase 6 OS=Homo sapiens GN=CDK6 PE=1 SV=1 - [CDK6_HUMAN]	326	36.9	0.917	1.358	1.264	1.147	1.402	15	16	34	32	9.7	32	11.6	32	8.6	32	10.8	32	13.8
D6RAD4	CDK7		Cyclin-dependent kinase 7 OS=Homo sapiens GN=CDK7 PE=2 SV=1 - [D6RAD4_HUMAN]	309	34.6	1.074	1.111	0.944	0.941	0.92	5	5	8	8	9.7	8	9.2	8	10.2	8	9.8	8	2.5
P49336	CDK8	Cyclin-dependent kinase 8	Cyclin-dependent kinase 8 OS=Homo sapiens GN=CDK8 PE=1 SV=1 - [CDK8_HUMAN]	464	53.2	0.913	1.19	0.93	0.89	1.043	1	5	5	1	NaN	1	NaN	1	NaN	1	NaN	1	NaN
P50750	CDK9	Cyclin-dependent kinase 9	Cyclin-dependent kinase 9 OS=Homo sapiens GN=CDK9 PE=1 SV=3 - [CDK9_HUMAN]	372	42.8	0.972	0.862	0.806	0.886	0.876	5	8	10	6	13.4	6	7.9	6	8.1	6	7.5	6	12.8
Q5VV42	CDKAL1	Threonylcarbamoyladenosine tRNA methylthiotransferase	Threonylcarbamoyladenosine tRNA methylthiotransferase OS=Homo sapiens GN=CDKAL1 PE=1 SV=1 - [CDKAL_HUMAN]	579	65.1	1.01	1.022	0.817	0.632	0.84	9	9	13	12	11.4	12	9.1	12	7.8	12	25	12	13
H7C2T1	CDKN1B		Cyclin-dependent kinase inhibitor 1B (Fragment) OS=Homo sapiens GN=CDKN1B PE=2 SV=1 - [H7C2T1_HUMAN]	104	11.9	1.028	0.836	0.588	0.737	0.761	2	2	2	2	2.5	2	7	2	39.9	2	31.1	2	18.6
Q9NXV6	CDKN2AIP	CDKN2A-interacting protein	CDKN2A-interacting protein OS=Homo sapiens GN=CDKN2AIP PE=1 SV=3 - [CARF_HUMAN]	580	61.1	1.036	0.962	0.896	0.914	0.975	17	17	23	23	7.1	23	5.7	23	8.1	23	14.4	23	6.7
Q96HQ2	CDKN2AIPNL	CDKN2AIP N-terminal-like protein	CDKN2AIP N-terminal-like protein OS=Homo sapiens GN=CDKN2AIPNL PE=1 SV=1 - [C2AIL_HUMAN]	116	13.2	1.006	0.92	0.821	0.899	1.057	4	4	4	4	5.2	4	1.6	4	6.6	4	4.7	4	8.6
P42773	CDKN2C	Cyclin-dependent kinase 4 inhibitor C	Cyclin-dependent kinase 4 inhibitor C OS=Homo sapiens GN=CDKN2C PE=1 SV=1 - [CDN2C_HUMAN]	168	18.1	1.062	0.982	1.136	1.39	1.286	4	4	9	6	6.7	6	4.3	6	7.6	6	3.2	6	4.4
H3BN65	CDR2		Cerebellar degeneration-related protein 2 (Fragment) OS=Homo sapiens GN=CDR2 PE=2 SV=1 - [H3BN65_HUMAN]	63	7.2	0.875	0.847	0.746	0.965	0.955	1	1	1	1	NaN	1	NaN	1	NaN	1	NaN	1	NaN
O95674	CDS2	Phosphatidate cytidylyltransferase 2	Phosphatidate cytidylyltransferase 2 OS=Homo sapiens GN=CDS2 PE=1 SV=1 - [CDS2_HUMAN]	445	51.4	0.953	1.012	1.244	1.453	1.005	4	4	5	5	2.4	5	9.8	5	15.4	5	10.4	5	13.9
Q9UKY7	CDV3	Protein CDV3 homolog	Protein CDV3 homolog OS=Homo sapiens GN=CDV3 PE=1 SV=1 - [CDV3_HUMAN]	258	27.3	0.972	0.968	0.783	0.819	0.88	9	9	16	16	9.7	16	13.5	16	15.4	16	14.5	16	14.8
Q9Y232	CDYL	Chromodomain Y-like protein	Chromodomain Y-like protein OS=Homo sapiens GN=CDYL PE=1 SV=2 - [CDYL1_HUMAN]	598	66.4	0.925	0.923	0.928	0.945	0.856	2	2	2	2	19.3	2	4.8	2	1.5	2	3.1	2	7.1
Q03701	CEBPZ	CCAAT/enhancer-binding protein zeta	CCAAT/enhancer-binding protein zeta OS=Homo sapiens GN=CEBPZ PE=1 SV=3 - [CEBPZ_HUMAN]	1054	120.9	0.985	1.034	0.935	0.818	0.911	27	27	47	46	6.1	46	12.2	46	11.5	46	10.8	46	11.6
Q9BXW7	CECR5	Cat eye syndrome critical region protein 5	Cat eye syndrome critical region protein 5 OS=Homo sapiens GN=CECR5 PE=1 SV=1 - [CECR5_HUMAN]	423	46.3	1.071	0.887	0.936	0.868	0.745	8	8	24	24	7.5	24	9.9	24	9.1	24	9.8	24	10.7
G5EA30	CELF1		CUG triplet repeat, RNA binding protein 1, isoform CRA_c OS=Homo sapiens GN=CELF1 PE=2 SV=1 - [G5EA30_HUMAN]	514	55.1	1.033	0.875	0.771	0.715	0.797	7	9	13	11	10.2	11	9.5	11	7.6	11	9.6	11	10.4
E9PC62	CELF2		CUGBP Elav-like family member 2 OS=Homo sapiens GN=CELF2 PE=2 SV=1 - [E9PC62_HUMAN]	521	55.7	1.047	1.11	1.201	1.248	1.26	10	12	31	27	7.4	27	8.5	27	8.5	27	10	27	7.6
P07199	CENPB	Major centromere autoantigen B	Major centromere autoantigen B OS=Homo sapiens GN=CENPB PE=1 SV=2 - [CENPB_HUMAN]	599	65.1	0.847	0.829	0.883	0.984	1.044	2	2	3	3	19.3	3	41	3	28.1	3	2.1	3	16.5
Q6PIR0	CENPC1		CENPC1 protein OS=Homo sapiens GN=CENPC1 PE=2 SV=1 - [Q6PIR0_HUMAN]	542	61.5	0.936	0.743	0.609	0.564	0.78	5	5	22	19	18.8	19	9.9	19	22.4	19	16	19	12
Q02224	CENPE	Centromere-associated protein E	Centromere-associated protein E OS=Homo sapiens GN=CENPE PE=1 SV=2 - [CENPE_HUMAN]	2701	316.2	1.062	1.431	1.671	1.5	1.159	15	17	18	15	10.7	15	27.4	15	39	15	16.1	15	15.9
P49454	CENPF	Centromere protein F	Centromere protein F OS=Homo sapiens GN=CENPF PE=1 SV=2 - [CENPF_HUMAN]	3210	367.5	1.223	1.497	1.805	1.296	1.209	84	87	96	93	10	93	12.4	93	15.7	93	11.3	93	12.6
B3KVZ3	CENPH		Centromere protein H OS=Homo sapiens GN=CENPH PE=2 SV=1 - [B3KVZ3_HUMAN]	228	26.2	0.985	1.069	0.941	0.806	1.073	5	5	6	6	9	6	6.3	6	19.4	6	28.2	6	13.3
Q5JX01	CENPI		Centromere protein I (Fragment) OS=Homo sapiens GN=CENPI PE=2 SV=1 - [Q5JX01_HUMAN]	75	8.4	1.113	1.152	1.409	1.14	1.122	1	1	1	1	NaN	1	NaN	1	NaN	1	NaN	1	NaN
D6RHD3	CENPK		Centromere protein K OS=Homo sapiens GN=CENPK PE=2 SV=1 - [D6RHD3_HUMAN]	239	28.2	1.065	1.017	0.866	0.738	1.045	3	4	4	3	2.1	3	5.6	3	5.8	3	17.4	3	1.2
Q8N0S6	CENPL	Centromere protein L	Centromere protein L OS=Homo sapiens GN=CENPL PE=1 SV=2 - [CENPL_HUMAN]	344	39	0.88	0.896	0.955	0.895	0.843	1	1	2	2	19	2	2.9	2	15.6	2	7.8	2	12.5
Q96H22	CENPN	Centromere protein N	Centromere protein N OS=Homo sapiens GN=CENPN PE=1 SV=2 - [CENPN_HUMAN]	339	39.5	1.051	0.896	0.879	0.881	0.947	5	5	6	6	3.7	6	24.2	6	8.3	6	17.2	6	14.3
Q9BU64	CENPO	Centromere protein O	Centromere protein O OS=Homo sapiens GN=CENPO PE=1 SV=1 - [CENPO_HUMAN]	300	33.8	1.081	1.179	1.11	0.884	1.051	1	1	1	1	NaN	1	NaN	1	NaN	1	NaN	1	NaN
Q7L2Z9	CENPQ	Centromere protein Q	Centromere protein Q OS=Homo sapiens GN=CENPQ PE=1 SV=1 - [CENPQ_HUMAN]	268	30.6	1.03	1.142	1.124	0.917	1.048	4	4	4	4	9.9	4	2.2	4	5	4	13.9	4	12.6
Q7Z7K6	CENPV	Centromere protein V	Centromere protein V OS=Homo sapiens GN=CENPV PE=1 SV=1 - [CENPV_HUMAN]	275	29.9	1.067	0.92	0.864	0.935	0.835	8	8	11	11	7.9	11	9.5	11	16.7	11	5.6	11	1.4
F8VRV0	CEP120		Centrosomal protein of 120 kDa (Fragment) OS=Homo sapiens GN=CEP120 PE=4 SV=1 - [F8VRV0_HUMAN]	165	18.6	0.909	1.053	1.101	0.964	1.235	1	1	1	1	NaN	1	NaN	1	NaN	1	NaN	1	NaN
Q66GS9	CEP135	Centrosomal protein of 135 kDa	Centrosomal protein of 135 kDa OS=Homo sapiens GN=CEP135 PE=1 SV=2 - [CP135_HUMAN]	1140	133.4	0.961	0.871	0.71	0.72	0.931	8	8	10	9	13.6	9	12.8	9	11.3	9	16.9	9	5.8
Q5SW79	CEP170	Centrosomal protein of 170 kDa	Centrosomal protein of 170 kDa OS=Homo sapiens GN=CEP170 PE=1 SV=1 - [CE170_HUMAN]	1584	175.2	0.983	0.971	0.97	0.97	1.024	23	23	25	25	9.1	25	8.6	25	13.2	25	10	25	16.1
Q9BV73	CEP250	Centrosome-associated protein CEP250	Centrosome-associated protein CEP250 OS=Homo sapiens GN=CEP250 PE=1 SV=2 - [CP250_HUMAN]	2442	281	0.966	1.106	1.006	1.063	1.131	12	13	17	16	13.8	16	12.1	16	8.4	16	8.8	16	13.7
H0Y7F7	CEP350		Centrosome-associated protein 350 (Fragment) OS=Homo sapiens GN=CEP350 PE=4 SV=1 - [H0Y7F7_HUMAN]	1292	147.2	0.86	0.981	0.672	0.68	0.925	4	4	4	4	7.1	4	1.4	4	23.5	4	14.6	4	5
Q9BYV8	CEP41	Centrosomal protein of 41 kDa	Centrosomal protein of 41 kDa OS=Homo sapiens GN=CEP41 PE=1 SV=1 - [CEP41_HUMAN]	373	41.3	1.075	1.174	1.218	1.259	1.443	4	4	4	4	7	4	10.5	4	11.5	4	29.7	4	16.5
Q9C0F1	CEP44	Centrosomal protein of 44 kDa	Centrosomal protein of 44 kDa OS=Homo sapiens GN=CEP44 PE=1 SV=2 - [CEP44_HUMAN]	390	44.1	0.985	0.974	1.154	1.144	0.969	10	10	16	16	18.3	16	7.2	16	12.2	16	10.4	16	13.1
Q53EZ4	CEP55	Centrosomal protein of 55 kDa	Centrosomal protein of 55 kDa OS=Homo sapiens GN=CEP55 PE=1 SV=3 - [CEP55_HUMAN]	464	54.1	0.987	0.925	1.008	0.955	1.019	9	9	10	10	4.4	10	9.6	10	17.6	10	10.7	10	12.6
F5GYW0	CEP57		Centrosomal protein of 57 kDa OS=Homo sapiens GN=CEP57 PE=2 SV=1 - [F5GYW0_HUMAN]	473	54.5	0.772	1.008	0.959	0.824	0.955	5	5	7	7	10.2	7	11.7	7	26.6	7	31.9	7	16.5
Q96MT8	CEP63	Centrosomal protein of 63 kDa	Centrosomal protein of 63 kDa OS=Homo sapiens GN=CEP63 PE=1 SV=1 - [CEP63_HUMAN]	703	81.3	1.032	0.932	0.902	0.871	0.948	1	1	1	1	NaN	1	NaN	1	NaN	1	NaN	1	NaN
F5H2Y2	CEP68		Cartilage acidic protein 1 OS=Homo sapiens GN=CEP68 PE=2 SV=1 - [F5H2Y2_HUMAN]	670	71.5	0.534	1.53	0.975	0.766	1.502	1	1	2	2	65.7	2	2.3	2	11.4	2	8.7	2	7.9
Q8TAP6	CEP76	Centrosomal protein of 76 kDa	Centrosomal protein of 76 kDa OS=Homo sapiens GN=CEP76 PE=1 SV=1 - [CEP76_HUMAN]	659	74.4	1.02	0.959	0.818	0.738	1.022	2	2	2	2	5.3	2	6.4	2	24.2	2	45.8	2	21.3
Q5JTW2	CEP78	Centrosomal protein of 78 kDa	Centrosomal protein of 78 kDa OS=Homo sapiens GN=CEP78 PE=1 SV=1 - [CEP78_HUMAN]	689	76.3	0.835	1.414	1.035	0.811	1.377	4	4	4	4	1.1	4	9.2	4	9.7	4	9.2	4	14.4
H7BZW2	CEP85		Centrosomal protein of 85 kDa (Fragment) OS=Homo sapiens GN=CEP85 PE=4 SV=1 - [H7BZW2_HUMAN]	435	50.3	0.896	1.041	0.862	0.796	1.061	6	6	7	7	4.5	7	7.8	7	2.6	7	12.8	7	14.3
E9PG22	CEP97		Centrosomal protein of 97 kDa OS=Homo sapiens GN=CEP97 PE=2 SV=1 - [E9PG22_HUMAN]	806	90.3	0.997	1.139	1.113	0.777	1.246	11	11	17	16	4.2	16	17.2	16	21.1	16	32.5	16	7.2
Q5SZE1	CERS2		Ceramide synthase 2 (Fragment) OS=Homo sapiens GN=CERS2 PE=2 SV=1 - [Q5SZE1_HUMAN]	324	38.5	0.977	1.032	1.163	1.061	0.977	3	3	4	4	5	4	4.8	4	10.5	4	5.5	4	4
Q6ZMG9	CERS6	Ceramide synthase 6	Ceramide synthase 6 OS=Homo sapiens GN=CERS6 PE=1 SV=1 - [CERS6_HUMAN]	384	44.9	0.967	1.062	1.087	1.188	0.995	3	3	3	3	1	3	3.6	3	6.2	3	1.6	3	11.3
Q6UWW8	CES3	Carboxylesterase 3	Carboxylesterase 3 OS=Homo sapiens GN=CES3 PE=1 SV=1 - [EST3_HUMAN]	571	62.2	0.983	1.076	1.454	1.633	1.198	4	4	5	5	9.1	5	4.5	5	4.4	5	21.4	5	9
P41208	CETN2	Centrin-2	Centrin-2 OS=Homo sapiens GN=CETN2 PE=1 SV=1 - [CETN2_HUMAN]	172	19.7	0.978	1.085	1.367	1.32	1.053	6	6	11	11	1.9	11	8.8	11	14.3	11	17.4	11	9.4
E5RK82	CETN3		Centrin-3 OS=Homo sapiens GN=CETN3 PE=2 SV=1 - [E5RK82_HUMAN]	156	18.3	0.88	1.154	1.098	0.952	1.25	2	2	2	2	8	2	0.8	2	6.1	2	7	2	25.6
Q9UEE9	CFDP1	Craniofacial development protein 1	Craniofacial development protein 1 OS=Homo sapiens GN=CFDP1 PE=1 SV=1 - [CFDP1_HUMAN]	299	33.6	1.005	0.918	0.782	0.651	0.849	6	6	9	9	5.6	9	9.1	9	21	9	16.9	9	11.6
P23528	CFL1	Cofilin-1	Cofilin-1 OS=Homo sapiens GN=CFL1 PE=1 SV=3 - [COF1_HUMAN]	166	18.5	1.034	0.99	1.091	1.112	1.032	9	14	60	42	9.6	42	11.3	42	15.1	42	12.7	42	16.4
Q9Y281	CFL2	Cofilin-2	Cofilin-2 OS=Homo sapiens GN=CFL2 PE=1 SV=1 - [COF2_HUMAN]	166	18.7	1.19	1.57	1.757	1.915	1.872	1	6	18	1	NaN	1	NaN	1	NaN	1	NaN	1	NaN
Q9UFW8	CGGBP1	CGG triplet repeat-binding protein 1	CGG triplet repeat-binding protein 1 OS=Homo sapiens GN=CGGBP1 PE=1 SV=2 - [CGBP1_HUMAN]	167	18.8	0.993	0.905	0.863	0.843	1.052	8	8	14	14	6.2	14	3.9	14	7.5	14	13.5	14	12.5
Q8WUX2	CHAC2	Cation transport regulator-like protein 2	Cation transport regulator-like protein 2 OS=Homo sapiens GN=CHAC2 PE=2 SV=1 - [CHAC2_HUMAN]	184	20.9	0.94	1.102	1.1	1.045	1.301	3	3	6	6	6.4	6	7.2	6	9.2	6	14	6	8.6
Q13111	CHAF1A	Chromatin assembly factor 1 subunit A	Chromatin assembly factor 1 subunit A OS=Homo sapiens GN=CHAF1A PE=1 SV=2 - [CAF1A_HUMAN]	956	106.9	0.998	0.954	0.838	0.764	1.009	18	18	22	22	5.1	22	7.8	22	10	22	12.4	22	7.8
Q13112	CHAF1B	Chromatin assembly factor 1 subunit B	Chromatin assembly factor 1 subunit B OS=Homo sapiens GN=CHAF1B PE=1 SV=1 - [CAF1B_HUMAN]	559	61.5	1.039	1.034	1.053	0.986	1.031	12	12	13	13	5.1	13	11.9	13	13.4	13	12.8	13	12.9
Q96JM3	CHAMP1	Chromosome alignment-maintaining phosphoprotein 1	Chromosome alignment-maintaining phosphoprotein 1 OS=Homo sapiens GN=CHAMP1 PE=1 SV=2 - [CHAP1_HUMAN]	812	89	1.033	0.865	0.825	0.859	0.937	16	16	24	24	9.4	24	9.3	24	9	24	10.9	24	9.9
Q96BP2	CHCHD1	Coiled-coil-helix-coiled-coil-helix domain-containing protein 1	Coiled-coil-helix-coiled-coil-helix domain-containing protein 1 OS=Homo sapiens GN=CHCHD1 PE=1 SV=1 - [CHCH1_HUMAN]	118	13.5	1.001	1.096	1.218	1.155	1.051	2	2	3	3	6.3	3	15.8	3	5.6	3	7.8	3	0.3
Q8WYQ3	CHCHD10	Coiled-coil-helix-coiled-coil-helix domain-containing protein 10, mitochondrial	Coiled-coil-helix-coiled-coil-helix domain-containing protein 10, mitochondrial OS=Homo sapiens GN=CHCHD10 PE=1 SV=1 - [CHC10_HUMAN]	142	14.1	0.937	1.064	0.737	0.513	0.79	1	1	1	1	NaN	1	NaN	1	NaN	1	NaN	1	NaN
Q9Y6H1	CHCHD2	Coiled-coil-helix-coiled-coil-helix domain-containing protein 2, mitochondrial	Coiled-coil-helix-coiled-coil-helix domain-containing protein 2, mitochondrial OS=Homo sapiens GN=CHCHD2 PE=1 SV=1 - [CHCH2_HUMAN]	151	15.5	0.904	1.094	0.943	0.602	1.187	3	3	10	10	11.4	10	6.7	10	12.7	10	6.8	10	8
Q9NX63	CHCHD3	Coiled-coil-helix-coiled-coil-helix domain-containing protein 3, mitochondrial	Coiled-coil-helix-coiled-coil-helix domain-containing protein 3, mitochondrial OS=Homo sapiens GN=CHCHD3 PE=1 SV=1 - [CHCH3_HUMAN]	227	26.1	1.01	0.96	0.93	0.968	0.844	10	10	18	18	9.7	18	5.2	18	11.5	18	8.7	18	7.4
Q8N4Q1	CHCHD4	Mitochondrial intermembrane space import and assembly protein 40	Mitochondrial intermembrane space import and assembly protein 40 OS=Homo sapiens GN=CHCHD4 PE=1 SV=1 - [MIA40_HUMAN]	142	16	1.032	1.143	1.037	1.03	1.049	3	3	4	4	2.4	4	7.4	4	9.4	4	8.3	4	2.2
J3QTB2	CHCHD6		Coiled-coil-helix-coiled-coil-helix domain-containing protein 6, mitochondrial OS=Homo sapiens GN=CHCHD6 PE=4 SV=1 - [J3QTB2_HUMAN]	140	15.3	0.992	0.953	0.827	0.779	0.758	7	7	10	10	10.5	10	9.9	10	12.7	10	10	10	12.2
E5RJ08	CHCHD7		Coiled-coil-helix-coiled-coil-helix domain-containing protein 7 (Fragment) OS=Homo sapiens GN=CHCHD7 PE=2 SV=1 - [E5RJ08_HUMAN]	44	5.2	1.254	1.055	1.412	1.189	1.109	1	1	1	1	NaN	1	NaN	1	NaN	1	NaN	1	NaN
O14646	CHD1	Chromodomain-helicase-DNA-binding protein 1	Chromodomain-helicase-DNA-binding protein 1 OS=Homo sapiens GN=CHD1 PE=1 SV=2 - [CHD1_HUMAN]	1710	196.6	0.919	1.042	0.899	0.903	1.008	15	21	23	16	9.9	16	9.3	16	17.7	16	15.2	16	4.6
Q86WJ1	CHD1L	Chromodomain-helicase-DNA-binding protein 1-like	Chromodomain-helicase-DNA-binding protein 1-like OS=Homo sapiens GN=CHD1L PE=1 SV=2 - [CHD1L_HUMAN]	897	100.9	1.013	1.035	1.078	1.112	1.155	19	19	25	25	6.2	25	6.8	25	13.1	25	8.5	25	7.2
O14647	CHD2	Chromodomain-helicase-DNA-binding protein 2	Chromodomain-helicase-DNA-binding protein 2 OS=Homo sapiens GN=CHD2 PE=1 SV=2 - [CHD2_HUMAN]	1828	211.2	0.985	1.023	0.971	1.04	0.921	5	11	12	5	4	5	44.9	5	18.7	5	8	5	17.9
Q12873	CHD3	Chromodomain-helicase-DNA-binding protein 3	Chromodomain-helicase-DNA-binding protein 3 OS=Homo sapiens GN=CHD3 PE=1 SV=3 - [CHD3_HUMAN]	2000	226.4	1.027	0.984	0.996	1.057	0.914	14	27	41	16	9.7	16	7.4	16	10.4	16	11.9	16	20.5
I3L229	CHD3		Chromodomain-helicase-DNA-binding protein 3 (Fragment) OS=Homo sapiens GN=CHD3 PE=2 SV=1 - [I3L229_HUMAN]	250	27.9	1.007	1.276	0.79	0.871	1.238	1	5	8	1	NaN	1	NaN	1	NaN	1	NaN	1	NaN
F5GWX5	CHD4		Chromodomain-helicase-DNA-binding protein 4 OS=Homo sapiens GN=CHD4 PE=2 SV=1 - [F5GWX5_HUMAN]	1905	217	0.998	1.011	0.97	0.952	1.007	45	55	123	100	6.9	100	11.6	100	14.1	100	11.8	100	12.4
Q8TD26	CHD6	Chromodomain-helicase-DNA-binding protein 6	Chromodomain-helicase-DNA-binding protein 6 OS=Homo sapiens GN=CHD6 PE=1 SV=4 - [CHD6_HUMAN]	2715	305.2	0.749	0.816	0.845	0.806	0.961	3	7	9	3	10.5	3	13.1	3	12.4	3	24.2	3	5.9
Q9P2D1	CHD7	Chromodomain-helicase-DNA-binding protein 7	Chromodomain-helicase-DNA-binding protein 7 OS=Homo sapiens GN=CHD7 PE=1 SV=3 - [CHD7_HUMAN]	2997	335.7	0.941	1.068	0.991	0.965	1.226	10	13	14	10	9.6	10	9.5	10	15.1	10	14.6	10	12.6
Q9HCK8	CHD8	Chromodomain-helicase-DNA-binding protein 8	Chromodomain-helicase-DNA-binding protein 8 OS=Homo sapiens GN=CHD8 PE=1 SV=5 - [CHD8_HUMAN]	2581	290.3	0.891	1.014	1.009	0.947	0.974	5	8	10	5	5.6	5	3	5	3.9	5	10.8	5	26
H3BTW3	CHD9		Chromodomain-helicase-DNA-binding protein 9 (Fragment) OS=Homo sapiens GN=CHD9 PE=2 SV=1 - [H3BTW3_HUMAN]	1099	127.3	0.836	1.32	1.02	0.678	0.886	1	3	3	1	NaN	1	NaN	1	NaN	1	NaN	1	NaN
J3KN87	CHEK1		Serine/threonine-protein kinase Chk1 OS=Homo sapiens GN=CHEK1 PE=4 SV=1 - [J3KN87_HUMAN]	432	49	0.912	0.815	0.641	0.572	0.968	7	7	7	7	12.5	7	6.7	7	19.1	7	7.1	7	5.5
O96017	CHEK2	Serine/threonine-protein kinase Chk2	Serine/threonine-protein kinase Chk2 OS=Homo sapiens GN=CHEK2 PE=1 SV=1 - [CHK2_HUMAN]	543	60.9	1.006	1.056	0.997	1.064	1.027	12	12	17	17	5.5	17	7.5	17	15.7	17	15.6	17	10.3
Q8IWX8	CHERP	Calcium homeostasis endoplasmic reticulum protein	Calcium homeostasis endoplasmic reticulum protein OS=Homo sapiens GN=CHERP PE=1 SV=3 - [CHERP_HUMAN]	916	103.6	1.044	0.945	0.914	0.899	0.886	15	15	30	28	8.8	28	6.1	28	15.5	28	7.7	28	7.5
H0YEJ1	CHI3L2		Chitinase-3-like protein 2 (Fragment) OS=Homo sapiens GN=CHI3L2 PE=2 SV=1 - [H0YEJ1_HUMAN]	42	4.9	1.176	1.055	0.704	0.607	1.108	1	1	1	1	NaN	1	NaN	1	NaN	1	NaN	1	NaN
Q9BWS9	CHID1	Chitinase domain-containing protein 1	Chitinase domain-containing protein 1 OS=Homo sapiens GN=CHID1 PE=1 SV=1 - [CHID1_HUMAN]	393	44.9	0.951	0.869	1.027	1.212	1.014	5	5	9	9	6.4	9	14.1	9	7.3	9	5.1	9	9.7
P35790	CHKA	Choline kinase alpha	Choline kinase alpha OS=Homo sapiens GN=CHKA PE=1 SV=3 - [CHKA_HUMAN]	457	52.2	0.913	0.912	0.495	0.71	0.712	1	1	2	1	NaN	1	NaN	1	NaN	1	NaN	1	NaN
P24386	CHM	Rab proteins geranylgeranyltransferase component A 1	Rab proteins geranylgeranyltransferase component A 1 OS=Homo sapiens GN=CHM PE=1 SV=3 - [RAE1_HUMAN]	653	73.4	1.075	1.006	1.211	1.082	1.065	3	4	4	3	8	3	1.2	3	18.2	3	24.4	3	25.2
P26374	CHML	Rab proteins geranylgeranyltransferase component A 2	Rab proteins geranylgeranyltransferase component A 2 OS=Homo sapiens GN=CHML PE=1 SV=2 - [RAE2_HUMAN]	656	74	1.055	0.957	1.104	1.001	1.006	4	5	5	4	6.7	4	4.6	4	10.2	4	17.8	4	15.3
F8VUA2	CHMP1A		Charged multivesicular body protein 1a OS=Homo sapiens GN=CHMP1A PE=2 SV=1 - [F8VUA2_HUMAN]	181	19.5	1.002	0.901	0.943	1.05	0.93	5	5	5	5	2.5	5	2.5	5	12	5	2.9	5	4.6
Q7LBR1	CHMP1B	Charged multivesicular body protein 1b	Charged multivesicular body protein 1b OS=Homo sapiens GN=CHMP1B PE=1 SV=1 - [CHM1B_HUMAN]	199	22.1	1.035	1.088	1.082	1.263	1.34	5	5	6	6	2.9	6	6.6	6	7.7	6	7.2	6	10
O43633	CHMP2A	Charged multivesicular body protein 2a	Charged multivesicular body protein 2a OS=Homo sapiens GN=CHMP2A PE=1 SV=1 - [CHM2A_HUMAN]	222	25.1	0.967	1.227	1.49	1.697	1.105	6	6	11	11	11.3	11	6.7	11	11.3	11	8.1	11	13.8
Q9UQN3	CHMP2B	Charged multivesicular body protein 2b	Charged multivesicular body protein 2b OS=Homo sapiens GN=CHMP2B PE=1 SV=1 - [CHM2B_HUMAN]	213	23.9	1.045	1.078	0.875	0.881	0.984	3	3	4	4	6.4	4	5.1	4	9.4	4	13.9	4	4.9
Q9Y3E7	CHMP3	Charged multivesicular body protein 3	Charged multivesicular body protein 3 OS=Homo sapiens GN=CHMP3 PE=1 SV=3 - [CHMP3_HUMAN]	222	25.1	0.97	1.084	1.036	1.117	1.233	2	2	2	2	6.6	2	7	2	3.3	2	5.2	2	21.6
Q9BY43	CHMP4A	Charged multivesicular body protein 4a	Charged multivesicular body protein 4a OS=Homo sapiens GN=CHMP4A PE=1 SV=3 - [CHM4A_HUMAN]	222	25.1	0.939	0.964	1.123	1.152	1.06	2	7	11	3	3.1	3	0.3	3	3.5	3	13.7	3	6
Q9H444	CHMP4B	Charged multivesicular body protein 4b	Charged multivesicular body protein 4b OS=Homo sapiens GN=CHMP4B PE=1 SV=1 - [CHM4B_HUMAN]	224	24.9	0.985	0.946	0.951	0.97	0.938	4	5	11	10	6.8	10	9.8	10	7.1	10	7	10	8.6
Q9NZZ3	CHMP5	Charged multivesicular body protein 5	Charged multivesicular body protein 5 OS=Homo sapiens GN=CHMP5 PE=1 SV=1 - [CHMP5_HUMAN]	219	24.6	1.031	0.996	1.146	1.289	1.077	4	4	12	12	10.4	12	9.1	12	9.8	12	14.1	12	15.1
I3L3E4	CHMP6		Charged multivesicular body protein 6 (Fragment) OS=Homo sapiens GN=CHMP6 PE=2 SV=1 - [I3L3E4_HUMAN]	113	12.9	1.012	1.007	1.145	1.209	0.986	3	3	5	5	5.7	5	5.3	5	12.6	5	1.1	5	1.2
Q8WUX9	CHMP7	Charged multivesicular body protein 7	Charged multivesicular body protein 7 OS=Homo sapiens GN=CHMP7 PE=1 SV=1 - [CHMP7_HUMAN]	453	50.9	0.967	1.064	0.973	1.106	1.175	7	7	10	10	9.9	10	5.7	10	21	10	13.2	10	7.9
Q9UHD1	CHORDC1	Cysteine and histidine-rich domain-containing protein 1	Cysteine and histidine-rich domain-containing protein 1 OS=Homo sapiens GN=CHORDC1 PE=1 SV=2 - [CHRD1_HUMAN]	332	37.5	0.845	1.022	0.856	0.861	0.896	11	11	24	24	7.4	24	8.8	24	8.9	24	15.2	24	10.3
Q99653	CHP1	Calcineurin B homologous protein 1	Calcineurin B homologous protein 1 OS=Homo sapiens GN=CHP1 PE=1 SV=3 - [CHP1_HUMAN]	195	22.4	0.913	1.044	1.147	1.191	1.009	7	7	10	10	15.6	10	9.8	10	11.3	10	10.3	10	12.1
G5E9W2	CHPF2		Chondroitin sulfate glucuronyltransferase OS=Homo sapiens GN=CHPF2 PE=2 SV=1 - [G5E9W2_HUMAN]	764	85.1	0.858	0.961	1.052	0.98	0.849	2	2	2	2	4.8	2	9.5	2	17.9	2	26.2	2	4.8
F8W1B3	CHPT1		Cholinephosphotransferase 1 OS=Homo sapiens GN=CHPT1 PE=2 SV=1 - [F8W1B3_HUMAN]	398	44.2	1.078	1.113	1.201	1.068	1.318	1	1	1	1	NaN	1	NaN	1	NaN	1	NaN	1	NaN
Q9NRG0	CHRAC1	Chromatin accessibility complex protein 1	Chromatin accessibility complex protein 1 OS=Homo sapiens GN=CHRAC1 PE=1 SV=1 - [CHRC1_HUMAN]	131	14.7	1.036	1.017	0.968	0.901	1.066	2	2	5	5	11.5	5	3.5	5	10	5	12	5	23.1
Q04844	CHRNE	Acetylcholine receptor subunit epsilon	Acetylcholine receptor subunit epsilon OS=Homo sapiens GN=CHRNE PE=1 SV=2 - [ACHE_HUMAN]	493	54.7	1.044	0.915	0.801	0.909	1.003	1	2	2	1	NaN	1	NaN	1	NaN	1	NaN	1	NaN
F8VXK3	CHST11		Carbohydrate sulfotransferase 11 (Fragment) OS=Homo sapiens GN=CHST11 PE=2 SV=1 - [F8VXK3_HUMAN]	158	18.5	0.802	0.722	0.351	0.434	0.706	1	1	1	1	NaN	1	NaN	1	NaN	1	NaN	1	NaN
Q8NCH0	CHST14	Carbohydrate sulfotransferase 14	Carbohydrate sulfotransferase 14 OS=Homo sapiens GN=CHST14 PE=1 SV=2 - [CHSTE_HUMAN]	376	43	0.987	1.095	0.963	0.793	1.291	3	3	3	3	4.4	3	7.1	3	6.2	3	2.3	3	4.4
Q8WVB6	CHTF18	Chromosome transmission fidelity protein 18 homolog	Chromosome transmission fidelity protein 18 homolog OS=Homo sapiens GN=CHTF18 PE=1 SV=1 - [CTF18_HUMAN]	975	107.3	0.988	0.964	0.943	0.939	0.906	7	8	11	10	14	10	11.9	10	19.7	10	17.4	10	10.9
J3KSJ7	CHTF8		Chromosome transmission fidelity protein 8 homolog (Fragment) OS=Homo sapiens GN=CHTF8 PE=4 SV=1 - [J3KSJ7_HUMAN]	65	7.4	0.976	1.162	1.099	1.097	1.055	1	1	3	3	14.2	3	16.7	3	5.8	3	17	3	23.5
P0CG12	CHTF8	Chromosome transmission fidelity protein 8 homolog isoform 2	Chromosome transmission fidelity protein 8 homolog isoform 2 OS=Homo sapiens GN=CHTF8 PE=1 SV=1 - [CTF8A_HUMAN]	524	51.4	0.78	0.808	0.651	0.905	1.056	1	1	1	1	NaN	1	NaN	1	NaN	1	NaN	1	NaN
Q9Y3Y2	CHTOP	Chromatin target of PRMT1 protein	Chromatin target of PRMT1 protein OS=Homo sapiens GN=CHTOP PE=1 SV=2 - [CHTOP_HUMAN]	248	26.4	1.044	1.083	1.111	1.153	1.105	6	6	11	11	2.7	11	9.7	11	10	11	4.5	11	11
O15111	CHUK	Inhibitor of nuclear factor kappa-B kinase subunit alpha	Inhibitor of nuclear factor kappa-B kinase subunit alpha OS=Homo sapiens GN=CHUK PE=1 SV=2 - [IKKA_HUMAN]	745	84.6	0.963	1.078	1.225	1.262	1.26	9	10	11	10	6.5	10	7.6	10	16.6	10	21.3	10	18.2
B4DL54	CHURC1-FNTB		Protein CHURC1-FNTB OS=Homo sapiens GN=CHURC1-FNTB PE=2 SV=1 - [B4DL54_HUMAN]	471	52.8	0.928	1.248	0.98	0.939	1.112	3	4	6	4	9.3	4	19.5	4	3.5	4	12.6	4	5.7
O76071	CIAO1	Probable cytosolic iron-sulfur protein assembly protein CIAO1	Probable cytosolic iron-sulfur protein assembly protein CIAO1 OS=Homo sapiens GN=CIAO1 PE=1 SV=1 - [CIAO1_HUMAN]	339	37.8	0.952	0.878	0.909	0.926	0.821	8	8	14	14	7	14	16.1	14	14.3	14	6.6	14	12.3
Q6FI81	CIAPIN1	Anamorsin	Anamorsin OS=Homo sapiens GN=CIAPIN1 PE=1 SV=2 - [CPIN1_HUMAN]	312	33.6	0.982	1.046	0.991	0.983	1.133	14	14	19	19	5.6	19	10.3	19	11.3	19	9.5	19	13.8
Q99828	CIB1	Calcium and integrin-binding protein 1	Calcium and integrin-binding protein 1 OS=Homo sapiens GN=CIB1 PE=1 SV=4 - [CIB1_HUMAN]	191	21.7	0.875	0.851	0.724	0.876	0.732	2	2	2	2	15.7	2	9.2	2	1.4	2	10.8	2	4
Q9BW66	CINP	Cyclin-dependent kinase 2-interacting protein	Cyclin-dependent kinase 2-interacting protein OS=Homo sapiens GN=CINP PE=1 SV=1 - [CINP_HUMAN]	212	24.3	0.952	0.941	0.875	0.954	0.874	4	4	4	4	0.9	4	4.8	4	11.3	4	9.4	4	2.7
Q567R9	CIP29		CIP29 protein OS=Homo sapiens GN=CIP29 PE=2 SV=1 - [Q567R9_HUMAN]	150	16.8	1.067	1.001	0.928	0.924	0.945	6	6	10	10	5.2	10	9.4	10	7.2	10	7.6	10	7.2
Q86X95	CIR1	Corepressor interacting with RBPJ 1	Corepressor interacting with RBPJ 1 OS=Homo sapiens GN=CIR1 PE=1 SV=1 - [CIR1_HUMAN]	450	52.3	0.995	1.053	0.773	0.57	0.796	3	3	4	4	15.8	4	3.9	4	16.5	4	22.2	4	9.5
Q14011	CIRBP	Cold-inducible RNA-binding protein	Cold-inducible RNA-binding protein OS=Homo sapiens GN=CIRBP PE=1 SV=1 - [CIRBP_HUMAN]	172	18.6	1.055	0.991	0.898	0.983	1.063	6	6	26	21	8.1	21	9.5	21	10.5	21	6.4	21	9
Q969X6	CIRH1A	Cirhin	Cirhin OS=Homo sapiens GN=CIRH1A PE=1 SV=1 - [CIR1A_HUMAN]	686	76.8	0.936	0.951	0.695	0.612	0.789	11	11	23	23	10.1	23	9	23	7.9	23	9.2	23	11.1
Q9NZ45	CISD1	CDGSH iron-sulfur domain-containing protein 1	CDGSH iron-sulfur domain-containing protein 1 OS=Homo sapiens GN=CISD1 PE=1 SV=1 - [CISD1_HUMAN]	108	12.2	1.036	1.01	0.927	0.873	0.89	3	3	8	7	4	8	10.2	8	8.3	8	6.7	8	7.1
Q8N5K1	CISD2	CDGSH iron-sulfur domain-containing protein 2	CDGSH iron-sulfur domain-containing protein 2 OS=Homo sapiens GN=CISD2 PE=1 SV=1 - [CISD2_HUMAN]	135	15.3	0.996	0.926	0.989	1.008	0.924	7	7	12	12	6.1	12	15.6	12	6.3	12	18	12	13.5
P0C7P0	CISD3	CDGSH iron-sulfur domain-containing protein 3, mitochondrial	CDGSH iron-sulfur domain-containing protein 3, mitochondrial OS=Homo sapiens GN=CISD3 PE=1 SV=1 - [CISD3_HUMAN]	127	14.2	0.896	0.991	0.991	1.082	1.042	1	1	2	2	3.6	2	2	2	4.3	2	1	2	10.6
O14578	CIT	Citron Rho-interacting kinase	Citron Rho-interacting kinase OS=Homo sapiens GN=CIT PE=1 SV=2 - [CTRO_HUMAN]	2027	231.3	1.064	1.133	1.389	1.839	1.155	16	17	18	17	10.1	17	15.1	17	22.4	17	23.8	17	13.5
H0Y5D5	CIZ1		Cip1-interacting zinc finger protein (Fragment) OS=Homo sapiens GN=CIZ1 PE=2 SV=1 - [H0Y5D5_HUMAN]	820	91.1	0.964	0.996	0.946	0.814	1.209	8	8	9	9	2.5	9	2.6	9	12.6	9	19.5	9	15
E9PD90	CKAP2		Cytoskeleton-associated protein 2 OS=Homo sapiens GN=CKAP2 PE=2 SV=1 - [E9PD90_HUMAN]	634	71.2	1.09	1.386	2.501	3.085	1.204	16	16	23	22	9.2	22	10.2	22	26.1	22	25.1	22	7.1
Q8IYA6	CKAP2L	Cytoskeleton-associated protein 2-like	Cytoskeleton-associated protein 2-like OS=Homo sapiens GN=CKAP2L PE=1 SV=4 - [CKP2L_HUMAN]	745	83.5	1.118	1.682	2.35	2.029	1.271	7	7	8	8	9.3	8	26.3	8	37.1	8	38	8	15.5
Q07065	CKAP4	Cytoskeleton-associated protein 4	Cytoskeleton-associated protein 4 OS=Homo sapiens GN=CKAP4 PE=1 SV=2 - [CKAP4_HUMAN]	602	66	0.975	0.933	0.981	1.053	1.039	10	10	13	13	11.7	13	14.2	13	20.2	13	19.4	13	13.2
Q14008	CKAP5	Cytoskeleton-associated protein 5	Cytoskeleton-associated protein 5 OS=Homo sapiens GN=CKAP5 PE=1 SV=3 - [CKAP5_HUMAN]	2032	225.4	0.997	1.106	1.361	1.447	1.064	73	73	140	140	6.7	140	9.3	140	12.7	140	9.8	140	9.8
Q5T179	CKS1B		Cyclin-dependent kinases regulatory subunit 1 OS=Homo sapiens GN=CKS1B PE=2 SV=1 - [Q5T179_HUMAN]	67	8	1.087	0.974	0.976	0.926	1.071	2	3	7	6	7	6	31.4	6	11.3	6	17.2	6	12.6
P33552	CKS2	Cyclin-dependent kinases regulatory subunit 2	Cyclin-dependent kinases regulatory subunit 2 OS=Homo sapiens GN=CKS2 PE=1 SV=1 - [CKS2_HUMAN]	79	9.9	0.975	0.93	0.814	0.933	1.103	3	4	6	5	5.8	5	6.7	5	4.3	5	13.2	5	5.8
B7ZLX3	CLASP1		CLASP1 protein OS=Homo sapiens GN=CLASP1 PE=2 SV=1 - [B7ZLX3_HUMAN]	1477	163	1.019	1	1.073	1.092	1.021	29	32	43	38	7.7	38	6	38	13.4	38	13.2	38	9.1
F5H604	CLASP2		CLIP-associating protein 2 OS=Homo sapiens GN=CLASP2 PE=2 SV=1 - [F5H604_HUMAN]	1505	164.6	0.978	1.035	1.045	1.101	1.019	25	29	34	28	8.7	28	7.3	28	12.4	28	11.7	28	9.5
F8WAG9	CLASRP		CLK4-associating serine/arginine-rich protein OS=Homo sapiens GN=CLASRP PE=2 SV=1 - [F8WAG9_HUMAN]	612	70.2	1.308	0.931	0.758	0.845	0.649	1	2	3	2	13.8	2	21.1	2	12.3	2	34.1	2	1.4
Q96S66	CLCC1	Chloride channel CLIC-like protein 1	Chloride channel CLIC-like protein 1 OS=Homo sapiens GN=CLCC1 PE=1 SV=1 - [CLCC1_HUMAN]	551	62	1.075	1.167	1.711	1.635	1.13	2	2	2	2	8.6	2	4.7	2	24.8	2	21	2	11
E9PE15	CLCN3		H(+)/Cl(-) exchange transporter 3 (Fragment) OS=Homo sapiens GN=CLCN3 PE=2 SV=1 - [E9PE15_HUMAN]	725	80.5	1.097	1.278	1.222	1.431	1.227	4	4	4	4	13.2	4	7.5	4	12	4	15.5	4	15.9
H3BNG8	CLCN7		H(+)/Cl(-) exchange transporter 7 (Fragment) OS=Homo sapiens GN=CLCN7 PE=2 SV=1 - [H3BNG8_HUMAN]	119	13.5	0.964	1.037	1.035	1.046	1.064	1	1	1	1	NaN	1	NaN	1	NaN	1	NaN	1	NaN
D6RD48	CLDND1		Claudin domain-containing protein 1 (Fragment) OS=Homo sapiens GN=CLDND1 PE=2 SV=1 - [D6RD48_HUMAN]	89	10.3	0.803	1.328	1.084	0.915	1.369	1	1	1	1	NaN	1	NaN	1	NaN	1	NaN	1	NaN
A4QPA5	CLEC4F		C-type lectin domain family 4 member F OS=Homo sapiens GN=CLEC4F PE=2 SV=1 - [A4QPA5_HUMAN]	567	63.2	0.941	1.112	1.033	0.944	1.236	1	1	1	1	NaN	1	NaN	1	NaN	1	NaN	1	NaN
C9JPR7	CLEC5A		C-type lectin domain family 5 member A OS=Homo sapiens GN=CLEC5A PE=2 SV=1 - [C9JPR7_HUMAN]	155	18	0.827	1.084	1.402	1.33	1.184	1	1	1	1	NaN	1	NaN	1	NaN	1	NaN	1	NaN
O00299	CLIC1	Chloride intracellular channel protein 1	Chloride intracellular channel protein 1 OS=Homo sapiens GN=CLIC1 PE=1 SV=4 - [CLIC1_HUMAN]	241	26.9	1.025	1.218	1.398	1.453	1.2	8	8	42	41	8.7	41	18.1	41	16	41	13.6	41	13.8
Q9Y696	CLIC4	Chloride intracellular channel protein 4	Chloride intracellular channel protein 4 OS=Homo sapiens GN=CLIC4 PE=1 SV=4 - [CLIC4_HUMAN]	253	28.8	1.158	1.675	2.304	2.84	3.044	2	2	2	2	7.7	2	13.5	2	18.3	2	16.4	2	16.9
Q14677	CLINT1	Clathrin interactor 1	Clathrin interactor 1 OS=Homo sapiens GN=CLINT1 PE=1 SV=1 - [EPN4_HUMAN]	625	68.2	0.975	0.911	0.91	0.942	0.906	16	16	31	29	6.4	29	8	29	12.4	29	11.8	29	9.2
P30622	CLIP1	CAP-Gly domain-containing linker protein 1	CAP-Gly domain-containing linker protein 1 OS=Homo sapiens GN=CLIP1 PE=1 SV=2 - [CLIP1_HUMAN]	1438	162.1	0.99	1.189	1.091	1.208	1.222	15	15	15	15	4.8	15	10.8	15	17.6	15	15.9	15	19.4
P49759	CLK1	Dual specificity protein kinase CLK1	Dual specificity protein kinase CLK1 OS=Homo sapiens GN=CLK1 PE=1 SV=2 - [CLK1_HUMAN]	484	57.3	1.071	0.812	0.578	0.681	0.72	1	2	3	1	NaN	1	NaN	1	NaN	1	NaN	1	NaN
H3BRW2	CLK3		Dual-specificity protein kinase CLK3 (Fragment) OS=Homo sapiens GN=CLK3 PE=4 SV=1 - [H3BRW2_HUMAN]	70	8.3	0.956	0.896	1.088	0.982	0.818	1	1	1	1	NaN	1	NaN	1	NaN	1	NaN	1	NaN
Q9HAZ1	CLK4	Dual specificity protein kinase CLK4	Dual specificity protein kinase CLK4 OS=Homo sapiens GN=CLK4 PE=1 SV=1 - [CLK4_HUMAN]	481	57.5	1.202	1.067	0.725	0.779	0.909	1	2	3	1	NaN	1	NaN	1	NaN	1	NaN	1	NaN
O75503	CLN5	Ceroid-lipofuscinosis neuronal protein 5	Ceroid-lipofuscinosis neuronal protein 5 OS=Homo sapiens GN=CLN5 PE=1 SV=2 - [CLN5_HUMAN]	358	41.5	0.984	0.996	1.482	1.539	1.089	3	3	3	3	13.6	3	10	3	25.3	3	5.1	3	12
E9PMI6	CLNS1A		Methylosome subunit pICln OS=Homo sapiens GN=CLNS1A PE=2 SV=1 - [E9PMI6_HUMAN]	167	18.2	0.944	1.032	0.761	0.673	0.913	6	6	15	15	8.2	15	15.2	15	22.1	15	11.6	15	16.2
Q92989	CLP1	Polyribonucleotide 5'-hydroxyl-kinase Clp1	Polyribonucleotide 5'-hydroxyl-kinase Clp1 OS=Homo sapiens GN=CLP1 PE=1 SV=1 - [CLP1_HUMAN]	425	47.6	1.073	0.939	0.778	0.748	0.931	3	3	3	3	0.1	3	0.6	3	3.1	3	13.4	3	4.7
Q9H078	CLPB	Caseinolytic peptidase B protein homolog	Caseinolytic peptidase B protein homolog OS=Homo sapiens GN=CLPB PE=1 SV=1 - [CLPB_HUMAN]	707	78.7	1.074	1.075	1.045	0.913	0.952	2	12	16	2	11.9	2	0.1	2	10.4	2	1.9	2	13.1
B4DXW4	CLPB		Caseinolytic peptidase B protein homolog OS=Homo sapiens GN=CLPB PE=2 SV=1 - [B4DXW4_HUMAN]	506	57.6	0.979	1.064	1.101	0.993	1.19	1	11	15	1	NaN	1	NaN	1	NaN	1	NaN	1	NaN
Q16740	CLPP	Putative ATP-dependent Clp protease proteolytic subunit, mitochondrial	Putative ATP-dependent Clp protease proteolytic subunit, mitochondrial OS=Homo sapiens GN=CLPP PE=1 SV=1 - [CLPP_HUMAN]	277	30.2	0.963	1.002	1.115	1.089	0.873	8	8	19	18	7.9	18	5.4	18	11.2	18	9.8	18	7.3
F5H8J3	CLPTM1		Cleft lip and palate transmembrane protein 1 OS=Homo sapiens GN=CLPTM1 PE=2 SV=1 - [F5H8J3_HUMAN]	655	75.1	0.949	1.287	1.374	1.389	1.259	6	6	6	6	11.3	6	18.3	6	11.1	6	11.6	6	14.8
Q96KA5	CLPTM1L	Cleft lip and palate transmembrane protein 1-like protein	Cleft lip and palate transmembrane protein 1-like protein OS=Homo sapiens GN=CLPTM1L PE=1 SV=1 - [CLP1L_HUMAN]	538	62.2	0.93	1.023	1.114	1.148	1.195	7	7	10	8	13.6	8	9.3	8	2.9	8	11.2	8	8.1
O76031	CLPX	ATP-dependent Clp protease ATP-binding subunit clpX-like, mitochondrial	ATP-dependent Clp protease ATP-binding subunit clpX-like, mitochondrial OS=Homo sapiens GN=CLPX PE=1 SV=2 - [CLPX_HUMAN]	633	69.2	0.988	1.18	1.027	0.856	0.99	17	17	27	26	9.2	26	9.8	26	5.3	26	11.3	26	8.5
E7ESG2	CLSPN		Claspin OS=Homo sapiens GN=CLSPN PE=2 SV=1 - [E7ESG2_HUMAN]	1286	145.2	0.967	1.004	0.727	0.542	1.115	1	1	1	1	NaN	1	NaN	1	NaN	1	NaN	1	NaN
P09496	CLTA	Clathrin light chain A	Clathrin light chain A OS=Homo sapiens GN=CLTA PE=1 SV=1 - [CLCA_HUMAN]	248	27.1	1.044	0.922	0.787	0.678	0.985	4	4	8	8	1.6	8	10.2	8	15.5	8	21.8	8	11
P09497	CLTB	Clathrin light chain B	Clathrin light chain B OS=Homo sapiens GN=CLTB PE=1 SV=1 - [CLCB_HUMAN]	229	25.2	1.062	1.04	0.869	0.899	1.21	6	6	9	9	3.4	9	7.4	9	5.7	9	9.3	9	10.8
Q00610	CLTC	Clathrin heavy chain 1	Clathrin heavy chain 1 OS=Homo sapiens GN=CLTC PE=1 SV=5 - [CLH1_HUMAN]	1675	191.5	1.036	1.005	0.9	0.75	1.003	60	60	194	188	9	188	10.4	188	11.9	188	14.8	188	10.3
K7EIG1	CLUH	Clustered mitochondria protein homolog	Clustered mitochondria protein homolog OS=Homo sapiens GN=CLUH PE=3 SV=1 - [K7EIG1_HUMAN]	1242	139.5	0.892	0.902	0.678	0.528	0.757	15	32	41	19	6.9	19	7.9	19	23.1	19	17.3	19	14
I3L2B0	CLUH		Clustered mitochondria protein homolog OS=Homo sapiens GN=CLUH PE=2 SV=1 - [I3L2B0_HUMAN]	769	85.5	0.947	1.405	1.427	1.444	1.028	2	18	21	2	30	2	45.1	2	227.2	2	385.4	2	47.6
Q5JVC2	CLYBL		Citrate lyase subunit beta-like protein, mitochondrial (Fragment) OS=Homo sapiens GN=CLYBL PE=2 SV=1 - [Q5JVC2_HUMAN]	181	20.2	1.061	0.857	1.035	0.995	0.878	2	2	2	2	11.9	2	0.3	2	12.3	2	22.8	2	31.7
Q8NFW8	CMAS	N-acylneuraminate cytidylyltransferase	N-acylneuraminate cytidylyltransferase OS=Homo sapiens GN=CMAS PE=1 SV=2 - [NEUA_HUMAN]	434	48.3	1.05	1.022	1.074	1.002	0.855	13	13	15	15	6.8	15	14.7	15	7.2	15	12.9	15	19.3
Q7Z7K0	CMC1	COX assembly mitochondrial protein homolog	COX assembly mitochondrial protein homolog OS=Homo sapiens GN=CMC1 PE=1 SV=1 - [COXM1_HUMAN]	106	12.5	1.022	1.047	1.438	1.534	1.145	3	3	3	3	3.5	3	2.8	3	5.4	3	9.7	3	2.6
Q9NRP2	CMC2	COX assembly mitochondrial protein 2 homolog	COX assembly mitochondrial protein 2 homolog OS=Homo sapiens GN=CMC2 PE=1 SV=1 - [COXM2_HUMAN]	79	9.5	1.048	0.971	0.922	0.922	0.874	3	3	4	4	2.4	4	4.4	4	11.5	4	12.5	4	32.5
P56277	CMC4	Cx9C motif-containing protein 4	Cx9C motif-containing protein 4 OS=Homo sapiens GN=CMC4 PE=1 SV=1 - [CMC4_HUMAN]	68	7.7	1.043	0.899	0.935	1.119	1.331	4	4	5	5	8.1	5	14.6	5	18.6	5	39.7	5	21.2
Q8IY22	CMIP	C-Maf-inducing protein	C-Maf-inducing protein OS=Homo sapiens GN=CMIP PE=1 SV=3 - [CMIP_HUMAN]	773	86.3	1.079	1.055	0.999	1.464	1.124	1	1	1	1	NaN	1	NaN	1	NaN	1	NaN	1	NaN
P30085	CMPK1	UMP-CMP kinase	UMP-CMP kinase OS=Homo sapiens GN=CMPK1 PE=1 SV=3 - [KCY_HUMAN]	196	22.2	1.01	1.018	1.012	1.106	1.041	8	8	18	18	7.9	18	13.8	18	8.3	18	9.3	18	6.1
Q5EBM0	CMPK2	UMP-CMP kinase 2, mitochondrial	UMP-CMP kinase 2, mitochondrial OS=Homo sapiens GN=CMPK2 PE=1 SV=3 - [CMPK2_HUMAN]	449	49.4	1.025	0.987	0.978	1.17	0.983	7	7	10	10	4.3	10	7.5	10	7.8	10	20.7	10	8.4
C9J384	CMSS1		Protein CMSS1 (Fragment) OS=Homo sapiens GN=CMSS1 PE=2 SV=1 - [C9J384_HUMAN]	225	26.2	1.023	1.127	0.926	0.728	0.901	5	5	8	8	10.8	8	4.3	8	6.2	8	3.6	8	5.4
P62633	CNBP	Cellular nucleic acid-binding protein	Cellular nucleic acid-binding protein OS=Homo sapiens GN=CNBP PE=1 SV=1 - [CNBP_HUMAN]	177	19.4	1.058	0.917	0.521	0.563	0.912	8	8	22	22	6.5	22	7.7	22	17.2	22	10.2	22	11.2
Q96KP4	CNDP2	Cytosolic non-specific dipeptidase	Cytosolic non-specific dipeptidase OS=Homo sapiens GN=CNDP2 PE=1 SV=2 - [CNDP2_HUMAN]	475	52.8	1.008	1.001	1.109	1.161	1.016	16	16	41	41	7.4	41	7.4	41	6.5	41	9.3	41	11.1
A6NLH6	CNIH4		Protein cornichon homolog 4 OS=Homo sapiens GN=CNIH4 PE=2 SV=1 - [A6NLH6_HUMAN]	137	15.8	0.974	1.044	1.277	1.414	0.987	1	1	3	3	1.3	3	4.8	3	6.2	3	7.6	3	0.7
B4DDF4	CNN2		Calponin-2 OS=Homo sapiens GN=CNN2 PE=2 SV=1 - [B4DDF4_HUMAN]	298	32.6	1.001	0.855	0.931	0.99	1.146	10	10	23	23	7.8	23	11.1	23	10.3	23	14.7	23	9.4
Q8NE01	CNNM3	Metal transporter CNNM3	Metal transporter CNNM3 OS=Homo sapiens GN=CNNM3 PE=1 SV=1 - [CNNM3_HUMAN]	707	76.1	1.002	1.039	1.178	1.216	1.231	6	6	6	6	4.8	6	12	6	6.8	6	6.6	6	5.1
Q6P4Q7	CNNM4	Metal transporter CNNM4	Metal transporter CNNM4 OS=Homo sapiens GN=CNNM4 PE=1 SV=3 - [CNNM4_HUMAN]	775	86.6	1.046	0.856	0.999	1.094	1.021	2	2	2	2	11.7	2	4.4	2	11.5	2	4.1	2	11.3
A5YKK6	CNOT1	CCR4-NOT transcription complex subunit 1	CCR4-NOT transcription complex subunit 1 OS=Homo sapiens GN=CNOT1 PE=1 SV=2 - [CNOT1_HUMAN]	2376	266.8	1.017	0.961	0.957	0.975	0.959	38	45	63	49	9.6	50	11	49	13.5	50	10.5	50	9.4
H3BMZ2	CNOT1		CCR4-NOT transcription complex subunit 1 (Fragment) OS=Homo sapiens GN=CNOT1 PE=2 SV=1 - [H3BMZ2_HUMAN]	439	49.7	0.969	0.813	0.805	0.701	0.846	1	8	14	1	NaN	1	NaN	1	NaN	1	NaN	1	NaN
Q9H9A5	CNOT10	CCR4-NOT transcription complex subunit 10	CCR4-NOT transcription complex subunit 10 OS=Homo sapiens GN=CNOT10 PE=1 SV=1 - [CNO10_HUMAN]	744	82.3	0.916	0.95	0.902	0.913	0.913	8	8	9	9	23.3	9	5.5	9	16	9	18.5	9	8
Q9UKZ1	CNOT11	CCR4-NOT transcription complex subunit 11	CCR4-NOT transcription complex subunit 11 OS=Homo sapiens GN=CNOT11 PE=1 SV=1 - [CNO11_HUMAN]	510	55.2	0.933	0.977	1	0.966	0.989	4	4	5	5	3.2	5	1.9	5	17.4	5	9.8	5	15.2
F8VV52	CNOT2		CCR4-NOT transcription complex subunit 2 (Fragment) OS=Homo sapiens GN=CNOT2 PE=2 SV=1 - [F8VV52_HUMAN]	531	58.6	0.932	0.929	0.877	0.87	0.896	4	4	6	4	1.8	4	10.5	4	14.2	4	7.7	4	3.1
O75175	CNOT3	CCR4-NOT transcription complex subunit 3	CCR4-NOT transcription complex subunit 3 OS=Homo sapiens GN=CNOT3 PE=1 SV=1 - [CNOT3_HUMAN]	753	81.8	0.95	0.901	0.9	0.919	0.928	9	9	15	15	12.5	15	10.5	15	7.1	15	9.5	15	5.7
O95628	CNOT4	CCR4-NOT transcription complex subunit 4	CCR4-NOT transcription complex subunit 4 OS=Homo sapiens GN=CNOT4 PE=1 SV=3 - [CNOT4_HUMAN]	575	63.5	0.859	0.987	1.121	1.073	1.199	2	2	2	2	15.6	2	2.4	2	16.5	2	23.2	2	23.2
H0Y9C1	CNOT6L		CCR4-NOT transcription complex subunit 6-like (Fragment) OS=Homo sapiens GN=CNOT6L PE=4 SV=1 - [H0Y9C1_HUMAN]	469	52.8	0.815	0.622	0.817	0.827	0.928	3	3	3	3	31.8	3	71.9	3	4.4	3	12.4	3	11.3
Q9UIV1	CNOT7	CCR4-NOT transcription complex subunit 7	CCR4-NOT transcription complex subunit 7 OS=Homo sapiens GN=CNOT7 PE=1 SV=3 - [CNOT7_HUMAN]	285	32.7	0.99	0.931	0.879	0.912	0.986	6	7	8	6	5.7	6	6.5	6	8.5	6	12.5	6	2
E5RIL2	CNOT8		CCR4-NOT transcription complex subunit 8 (Fragment) OS=Homo sapiens GN=CNOT8 PE=2 SV=1 - [E5RIL2_HUMAN]	225	25.9	0.836	1.038	1.067	0.922	1.008	1	2	3	1	NaN	1	NaN	1	NaN	1	NaN	1	NaN
P09543	CNP	2',3'-cyclic-nucleotide 3'-phosphodiesterase	2',3'-cyclic-nucleotide 3'-phosphodiesterase OS=Homo sapiens GN=CNP PE=1 SV=2 - [CN37_HUMAN]	421	47.5	0.994	1.049	0.684	0.636	1.174	17	18	23	20	9.5	20	7	20	17.7	20	10.9	20	5.4
Q9Y2B0	CNPY2	Protein canopy homolog 2	Protein canopy homolog 2 OS=Homo sapiens GN=CNPY2 PE=1 SV=1 - [CNPY2_HUMAN]	182	20.6	1.024	1.125	1.195	1.282	1.199	9	9	16	16	6	16	8.2	16	8.5	16	10.5	16	13.1
Q9BT09	CNPY3	Protein canopy homolog 3	Protein canopy homolog 3 OS=Homo sapiens GN=CNPY3 PE=1 SV=1 - [CNPY3_HUMAN]	278	30.7	1.009	0.839	0.865	0.894	0.892	8	8	13	13	4.2	13	14.6	13	13.6	13	9.2	13	16.7
Q6PJW8	CNST	Consortin	Consortin OS=Homo sapiens GN=CNST PE=1 SV=3 - [CNST_HUMAN]	725	79.5	0.955	1.047	1.226	1.163	1.256	2	3	4	3	7.3	3	5.1	3	10.1	3	25.7	3	22
Q9GZY4	COA1	Cytochrome c oxidase assembly protein 1 homolog	Cytochrome c oxidase assembly protein 1 homolog OS=Homo sapiens GN=COA1 PE=1 SV=1 - [COA1_HUMAN]	146	16.7	1.019	0.938	0.8	0.822	0.748	3	3	3	3	1.4	3	2.8	3	0.8	3	7.4	3	1.1
Q9Y2R0	COA3	Cytochrome c oxidase assembly protein 3 homolog, mitochondrial	Cytochrome c oxidase assembly protein 3 homolog, mitochondrial OS=Homo sapiens GN=COA3 PE=1 SV=1 - [COA3_HUMAN]	106	11.7	0.928	0.999	1.098	1.141	1.012	4	4	9	9	8.1	9	8.6	9	10.4	9	14.4	9	7.2
Q9NYJ1	COA4	Cytochrome c oxidase assembly factor 4 homolog, mitochondrial	Cytochrome c oxidase assembly factor 4 homolog, mitochondrial OS=Homo sapiens GN=COA4 PE=1 SV=2 - [COA4_HUMAN]	87	10.1	1.144	0.665	0.582	0.645	1.021	1	1	1	1	NaN	1	NaN	1	NaN	1	NaN	1	NaN
B9A057	COA5		Cytochrome c oxidase assembly factor 5 OS=Homo sapiens GN=COA5 PE=2 SV=1 - [B9A057_HUMAN]	73	8.1	0.818	0.918	1.406	1.121	0.966	2	2	2	2	1.9	2	42.9	2	12.3	2	10.5	2	30.7
Q5JTJ3	COA6	Cytochrome c oxidase assembly factor 6 homolog	Cytochrome c oxidase assembly factor 6 homolog OS=Homo sapiens GN=COA6 PE=1 SV=1 - [COA6_HUMAN]	125	14.1	1.034	0.944	0.783	0.859	0.888	6	6	8	8	1.4	8	8	8	16.2	8	7.4	8	7.7
Q13057	COASY	Bifunctional coenzyme A synthase;Dephospho-CoA kinase;Phosphopantetheine adenylyltransferase	Bifunctional coenzyme A synthase OS=Homo sapiens GN=COASY PE=1 SV=4 - [COASY_HUMAN]	564	62.3	1.033	1.013	1.139	1.145	0.872	5	5	11	11	5	11	9.1	11	13.7	11	9.8	11	14.5
E9PBL8	COG1		Conserved oligomeric Golgi complex subunit 1 (Fragment) OS=Homo sapiens GN=COG1 PE=4 SV=2 - [E9PBL8_HUMAN]	962	107.2	1.04	0.985	1.128	1.134	1.009	14	14	14	14	4.7	14	10.6	14	13.7	14	6.8	14	10.7
B7Z2Y2	COG2		Conserved oligomeric Golgi complex subunit 2 OS=Homo sapiens GN=COG2 PE=2 SV=1 - [B7Z2Y2_HUMAN]	679	76	0.955	0.998	1.094	1.129	0.95	12	12	17	17	10.9	17	13.5	17	14	17	17.7	17	10.9
Q96JB2	COG3	Conserved oligomeric Golgi complex subunit 3	Conserved oligomeric Golgi complex subunit 3 OS=Homo sapiens GN=COG3 PE=1 SV=3 - [COG3_HUMAN]	828	94	0.949	1.012	1.061	1.183	1.011	10	10	12	12	5.3	12	7.8	12	6.6	12	9.7	12	9
Q9H9E3	COG4	Conserved oligomeric Golgi complex subunit 4	Conserved oligomeric Golgi complex subunit 4 OS=Homo sapiens GN=COG4 PE=1 SV=3 - [COG4_HUMAN]	785	89	1.029	1.044	1.218	1.229	1.016	10	10	14	14	10.4	14	13.7	14	8.3	14	11.7	14	8
Q9UP83	COG5	Conserved oligomeric Golgi complex subunit 5	Conserved oligomeric Golgi complex subunit 5 OS=Homo sapiens GN=COG5 PE=1 SV=3 - [COG5_HUMAN]	839	92.7	1.012	1.007	1.019	1.066	1.025	15	15	18	18	7.7	18	9.8	18	13.6	18	16.1	18	15.7
Q9Y2V7	COG6	Conserved oligomeric Golgi complex subunit 6	Conserved oligomeric Golgi complex subunit 6 OS=Homo sapiens GN=COG6 PE=1 SV=2 - [COG6_HUMAN]	657	73.2	0.943	0.977	1.17	1.207	0.968	8	9	14	11	21.2	11	9.6	11	9.9	11	6	11	5.1
P83436	COG7	Conserved oligomeric Golgi complex subunit 7	Conserved oligomeric Golgi complex subunit 7 OS=Homo sapiens GN=COG7 PE=1 SV=1 - [COG7_HUMAN]	770	86.3	1.017	1.043	1.144	1.172	1.004	11	11	14	14	6.5	14	6.7	14	10.4	14	11	14	6.5
Q96MW5	COG8	Conserved oligomeric Golgi complex subunit 8	Conserved oligomeric Golgi complex subunit 8 OS=Homo sapiens GN=COG8 PE=1 SV=2 - [COG8_HUMAN]	612	68.4	1.02	0.993	0.983	1.086	0.997	6	6	7	7	7.6	7	4.1	7	3	7	10.9	7	12
P38432	COIL	Coilin	Coilin OS=Homo sapiens GN=COIL PE=1 SV=1 - [COIL_HUMAN]	576	62.6	1.039	0.969	0.842	0.683	0.82	3	3	4	4	11.4	4	2.9	4	5.6	4	2.9	4	3.3
Q9Y5P4	COL4A3BP	Collagen type IV alpha-3-binding protein	Collagen type IV alpha-3-binding protein OS=Homo sapiens GN=COL4A3BP PE=1 SV=1 - [C43BP_HUMAN]	624	70.8	0.974	1.046	1.315	1.461	1.039	17	17	26	26	9.8	26	13.7	26	9.5	26	8.7	26	8.4
Q8NBJ5	COLGALT1	Procollagen galactosyltransferase 1	Procollagen galactosyltransferase 1 OS=Homo sapiens GN=COLGALT1 PE=1 SV=1 - [GT251_HUMAN]	622	71.6	0.811	0.886	0.834	0.876	0.917	7	7	8	8	7.1	8	8.2	8	2.1	8	7.1	8	6.8
Q8N668	COMMD1	COMM domain-containing protein 1	COMM domain-containing protein 1 OS=Homo sapiens GN=COMMD1 PE=1 SV=1 - [COMD1_HUMAN]	190	21.2	1.066	1.033	1.219	1.178	1.079	3	3	4	4	2.8	4	10	4	7.4	4	17.8	4	14.7
D6RJ90	COMMD10		COMM domain containing 10, isoform CRA_b OS=Homo sapiens GN=COMMD10 PE=2 SV=1 - [D6RJ90_HUMAN]	188	21.5	0.997	0.875	0.933	0.858	0.882	4	4	4	4	4.6	4	5.6	4	9.5	4	6.1	4	18.9
Q86X83	COMMD2	COMM domain-containing protein 2	COMM domain-containing protein 2 OS=Homo sapiens GN=COMMD2 PE=1 SV=2 - [COMD2_HUMAN]	199	22.7	1.041	1.046	1.11	1.124	1.147	4	4	5	5	0.9	5	7.7	5	13.9	5	8.1	5	4.8
Q9UBI1	COMMD3	COMM domain-containing protein 3	COMM domain-containing protein 3 OS=Homo sapiens GN=COMMD3 PE=1 SV=1 - [COMD3_HUMAN]	195	22.1	0.949	1.124	1.244	1.429	1.268	1	4	6	1	NaN	1	NaN	1	NaN	1	NaN	1	NaN
Q9H0A8	COMMD4	COMM domain-containing protein 4	COMM domain-containing protein 4 OS=Homo sapiens GN=COMMD4 PE=1 SV=1 - [COMD4_HUMAN]	199	21.8	1.038	1.09	1.242	1.24	1.208	7	7	9	9	7.6	9	11	9	14.5	9	7.3	9	5.5
Q9GZQ3	COMMD5	COMM domain-containing protein 5	COMM domain-containing protein 5 OS=Homo sapiens GN=COMMD5 PE=1 SV=1 - [COMD5_HUMAN]	224	24.7	0.912	0.866	0.763	0.788	0.759	3	3	3	3	6	3	10.3	3	9.1	3	6.5	3	19.1
Q7Z4G1	COMMD6	COMM domain-containing protein 6	COMM domain-containing protein 6 OS=Homo sapiens GN=COMMD6 PE=1 SV=1 - [COMD6_HUMAN]	85	9.6	0.973	1	1.138	1.28	1.199	4	4	8	8	3.8	8	6.8	8	13.3	8	1.9	8	7.5
Q86VX2	COMMD7	COMM domain-containing protein 7	COMM domain-containing protein 7 OS=Homo sapiens GN=COMMD7 PE=1 SV=2 - [COMD7_HUMAN]	200	22.5	1.019	0.903	0.921	0.907	0.945	3	3	3	3	9.5	3	7.7	3	6.4	3	3.7	3	4.9
Q9NX08	COMMD8	COMM domain-containing protein 8	COMM domain-containing protein 8 OS=Homo sapiens GN=COMMD8 PE=1 SV=1 - [COMD8_HUMAN]	183	21.1	0.909	1.049	1.212	1.328	1.186	4	4	9	9	17.6	9	8.7	9	8.6	9	24.3	9	18.9
Q9P000	COMMD9	COMM domain-containing protein 9	COMM domain-containing protein 9 OS=Homo sapiens GN=COMMD9 PE=1 SV=2 - [COMD9_HUMAN]	198	21.8	0.929	0.937	0.857	0.786	0.825	5	5	7	7	4.8	7	4.3	7	8.8	7	5.3	7	4.5
P21964	COMT	Catechol O-methyltransferase	Catechol O-methyltransferase OS=Homo sapiens GN=COMT PE=1 SV=2 - [COMT_HUMAN]	271	30	0.966	0.96	1.088	1.184	0.91	11	11	27	24	11.6	24	17.2	24	11.7	24	11	24	15.4
P53621	COPA	Coatomer subunit alpha;Proxenin;Xenin	Coatomer subunit alpha OS=Homo sapiens GN=COPA PE=1 SV=2 - [COPA_HUMAN]	1224	138.3	1.029	0.982	1.088	1.155	1.038	48	48	97	95	5.8	96	10.5	95	10.1	96	8.7	96	10
P53618	COPB1	Coatomer subunit beta	Coatomer subunit beta OS=Homo sapiens GN=COPB1 PE=1 SV=3 - [COPB_HUMAN]	953	107.1	1.011	1.051	1.182	1.234	1.066	31	31	82	81	7.7	82	8.9	82	11	82	8.6	82	8.5
B4DZI8	COPB2		Coatomer protein complex, subunit beta 2 (Beta prime), isoform CRA_b OS=Homo sapiens GN=COPB2 PE=2 SV=1 - [B4DZI8_HUMAN]	877	99	1	1.012	1.153	1.225	1.007	34	34	75	72	5.6	72	10.4	72	12.3	72	11.2	72	11.6
O14579	COPE	Coatomer subunit epsilon	Coatomer subunit epsilon OS=Homo sapiens GN=COPE PE=1 SV=3 - [COPE_HUMAN]	308	34.5	1.014	0.977	1.143	1.194	1.055	8	8	19	17	7.5	17	9.7	17	9	17	8.4	17	4
Q9Y678	COPG1	Coatomer subunit gamma-1	Coatomer subunit gamma-1 OS=Homo sapiens GN=COPG1 PE=1 SV=1 - [COPG1_HUMAN]	874	97.7	0.993	1.012	1.21	1.258	1.104	31	32	70	69	11.4	69	11.3	69	13.4	69	13.6	69	14.1
Q9UBF2	COPG2	Coatomer subunit gamma-2	Coatomer subunit gamma-2 OS=Homo sapiens GN=COPG2 PE=1 SV=1 - [COPG2_HUMAN]	871	97.6	1.04	0.967	1.011	0.984	0.975	18	19	32	31	11	31	16.8	31	12.6	31	10.5	31	12.2
H9KV77	COPRS		Coordinator of PRMT5 and differentiation stimulator OS=Homo sapiens GN=COPRS PE=2 SV=1 - [H9KV77_HUMAN]	172	18.9	0.912	1.051	0.753	0.763	1.207	2	2	2	2	26.1	2	2.1	2	60	2	78.8	2	4.9
P61201	COPS2	COP9 signalosome complex subunit 2	COP9 signalosome complex subunit 2 OS=Homo sapiens GN=COPS2 PE=1 SV=1 - [CSN2_HUMAN]	443	51.6	1.004	0.99	1.014	1.001	0.96	13	14	25	24	8.1	24	8.7	24	13.5	24	12.8	24	7.9
Q9UNS2	COPS3	COP9 signalosome complex subunit 3	COP9 signalosome complex subunit 3 OS=Homo sapiens GN=COPS3 PE=1 SV=3 - [CSN3_HUMAN]	423	47.8	1.003	0.936	0.952	0.915	0.938	15	15	30	29	5.9	29	6.7	29	11.8	29	8.3	29	9.9
Q9BT78	COPS4	COP9 signalosome complex subunit 4	COP9 signalosome complex subunit 4 OS=Homo sapiens GN=COPS4 PE=1 SV=1 - [CSN4_HUMAN]	406	46.2	1.031	0.951	1.01	0.993	0.918	17	17	29	29	6.3	29	8.8	29	11.2	29	4.4	29	5.2
Q92905	COPS5	COP9 signalosome complex subunit 5	COP9 signalosome complex subunit 5 OS=Homo sapiens GN=COPS5 PE=1 SV=4 - [CSN5_HUMAN]	334	37.6	1.057	0.991	0.929	0.938	0.89	8	8	16	16	9.5	16	12.8	16	9.3	16	17.4	16	17.3
E7EM64	COPS6		COP9 signalosome complex subunit 6 OS=Homo sapiens GN=COPS6 PE=2 SV=1 - [E7EM64_HUMAN]	326	36	1.03	0.92	0.984	0.976	0.916	12	12	19	19	4.6	19	9.4	19	8.9	19	8.5	19	7.3
F5GYF7	COPS7A		COP9 signalosome complex subunit 7a (Fragment) OS=Homo sapiens GN=COPS7A PE=2 SV=1 - [F5GYF7_HUMAN]	213	23.7	0.954	1.297	1.277	1.233	1.291	4	4	8	8	10.8	8	6	8	7.8	8	8.8	8	4
J3KQ34	COPS7B		COP9 signalosome complex subunit 7b OS=Homo sapiens GN=COPS7B PE=4 SV=1 - [J3KQ34_HUMAN]	230	26.4	1.044	0.915	0.801	0.909	0.935	7	7	9	9	13.4	9	13.1	9	19.4	9	18.6	9	17.3
E9PGT6	COPS8		COP9 signalosome complex subunit 8 OS=Homo sapiens GN=COPS8 PE=2 SV=1 - [E9PGT6_HUMAN]	173	19.3	0.907	0.939	0.954	0.98	1.006	5	5	11	11	12.5	11	12.2	11	12.7	11	10.1	11	16
P61923	COPZ1	Coatomer subunit zeta-1	Coatomer subunit zeta-1 OS=Homo sapiens GN=COPZ1 PE=1 SV=1 - [COPZ1_HUMAN]	177	20.2	0.991	1.017	1.091	1.045	1.054	5	5	9	9	5.2	9	17	9	20.4	9	13.9	9	5.4
Q9NZJ6	COQ3	Hexaprenyldihydroxybenzoate methyltransferase, mitochondrial	Hexaprenyldihydroxybenzoate methyltransferase, mitochondrial OS=Homo sapiens GN=COQ3 PE=1 SV=3 - [COQ3_HUMAN]	369	41	0.985	1.033	1.069	1.042	0.917	4	4	8	8	3.1	8	5.9	8	5.3	8	4.5	8	8.6
Q5HYK3	COQ5	2-methoxy-6-polyprenyl-1,4-benzoquinol methylase, mitochondrial	2-methoxy-6-polyprenyl-1,4-benzoquinol methylase, mitochondrial OS=Homo sapiens GN=COQ5 PE=1 SV=2 - [COQ5_HUMAN]	327	37.1	0.994	1.073	1.074	1.057	0.904	9	9	10	10	4.8	10	12.8	10	19.1	10	19.6	10	6.3
Q9Y2Z9	COQ6	Ubiquinone biosynthesis monooxygenase COQ6	Ubiquinone biosynthesis monooxygenase COQ6 OS=Homo sapiens GN=COQ6 PE=1 SV=2 - [COQ6_HUMAN]	468	50.8	1.009	0.948	1.214	1.115	0.787	4	4	5	5	10.8	5	9.4	5	2	5	11.3	5	26.4
H3BP28	COQ7		Ubiquinone biosynthesis protein COQ7 homolog OS=Homo sapiens GN=COQ7 PE=2 SV=1 - [H3BP28_HUMAN]	194	21.9	1.006	0.929	0.949	1.014	0.899	4	4	4	4	4.2	4	8.4	4	15.7	4	17.1	4	7.9
O75208	COQ9	Ubiquinone biosynthesis protein COQ9, mitochondrial	Ubiquinone biosynthesis protein COQ9, mitochondrial OS=Homo sapiens GN=COQ9 PE=1 SV=1 - [COQ9_HUMAN]	318	35.5	1.038	1.082	1.156	1.168	0.935	6	6	12	10	6.9	10	18.5	10	13.5	10	14.8	10	4.6
P31146	CORO1A	Coronin-1A	Coronin-1A OS=Homo sapiens GN=CORO1A PE=1 SV=4 - [COR1A_HUMAN]	461	51	1.006	0.84	0.87	0.869	0.846	17	18	49	44	3.9	44	9.5	44	11.7	44	11.7	44	12.2
Q9BR76	CORO1B	Coronin-1B	Coronin-1B OS=Homo sapiens GN=CORO1B PE=1 SV=1 - [COR1B_HUMAN]	489	54.2	0.871	0.758	0.696	0.605	0.558	1	1	2	2	1.8	2	9.2	2	16.1	2	13.3	2	19.3
Q9ULV4	CORO1C	Coronin-1C	Coronin-1C OS=Homo sapiens GN=CORO1C PE=1 SV=1 - [COR1C_HUMAN]	474	53.2	1.023	0.974	1.153	1.239	1.121	14	16	34	29	10.3	30	13.1	29	12.9	30	17.2	30	10.1
Q92828	CORO2A	Coronin-2A	Coronin-2A OS=Homo sapiens GN=CORO2A PE=2 SV=2 - [COR2A_HUMAN]	525	59.7	0.989	1.039	1.093	1.218	1	1	1	1	1	NaN	1	NaN	1	NaN	1	NaN	1	NaN
P57737	CORO7	Coronin-7	Coronin-7 OS=Homo sapiens GN=CORO7 PE=1 SV=2 - [CORO7_HUMAN]	925	100.5	0.996	0.885	1.008	1.131	1.027	22	22	44	42	4.5	42	4.9	42	11.3	42	10.4	42	10.7
H3BT58	COTL1		Coactosin-like protein OS=Homo sapiens GN=COTL1 PE=2 SV=1 - [H3BT58_HUMAN]	73	8.2	0.909	0.75	0.859	0.931	0.818	1	1	1	1	NaN	1	NaN	1	NaN	1	NaN	1	NaN
Q9Y6N1	COX11	Cytochrome c oxidase assembly protein COX11, mitochondrial	Cytochrome c oxidase assembly protein COX11, mitochondrial OS=Homo sapiens GN=COX11 PE=1 SV=3 - [COX11_HUMAN]	276	31.4	0.962	1.106	1.091	1.01	0.862	2	2	2	2	3.8	2	6.5	2	4.9	2	7.7	2	6.5
Q96I36	COX14	Cytochrome c oxidase assembly protein COX14	Cytochrome c oxidase assembly protein COX14 OS=Homo sapiens GN=COX14 PE=1 SV=1 - [COX14_HUMAN]	57	6.6	0.919	1.134	1.114	1.243	1.134	1	1	1	1	NaN	1	NaN	1	NaN	1	NaN	1	NaN
Q7KZN9	COX15	Cytochrome c oxidase assembly protein COX15 homolog	Cytochrome c oxidase assembly protein COX15 homolog OS=Homo sapiens GN=COX15 PE=1 SV=1 - [COX15_HUMAN]	410	46	0.924	1.042	1.214	0.797	0.858	3	3	4	4	21.6	4	3.5	4	3.6	4	11.7	4	5.7
Q9P0S2	COX16	Cytochrome c oxidase assembly protein COX16 homolog, mitochondrial	Cytochrome c oxidase assembly protein COX16 homolog, mitochondrial OS=Homo sapiens GN=COX16 PE=1 SV=1 - [COX16_HUMAN]	106	12.3	1.059	1.146	0.924	0.869	0.987	3	3	3	3	5.9	3	2	3	15.7	3	7.3	3	9.5
H7C4E5	COX17		Cytochrome c oxidase copper chaperone (Fragment) OS=Homo sapiens GN=COX17 PE=4 SV=1 - [H7C4E5_HUMAN]	58	6.4	1.1	0.864	0.767	1.064	1.103	3	3	5	5	0.5	5	3.4	5	4.7	5	2.3	5	11.9
Q49B96	COX19	Cytochrome c oxidase assembly protein COX19	Cytochrome c oxidase assembly protein COX19 OS=Homo sapiens GN=COX19 PE=1 SV=1 - [COX19_HUMAN]	90	10.4	1.223	0.918	0.937	1.015	0.972	3	3	4	4	3.5	4	6.8	4	3	4	11.5	4	6.8
Q5RI15	COX20	Cytochrome c oxidase protein 20 homolog	Cytochrome c oxidase protein 20 homolog OS=Homo sapiens GN=COX20 PE=1 SV=2 - [COX20_HUMAN]	118	13.3	1.083	1.094	1.072	0.93	0.807	2	2	5	5	2.9	5	14.2	5	9.6	5	4.4	5	1
P13073	COX4I1	Cytochrome c oxidase subunit 4 isoform 1, mitochondrial	Cytochrome c oxidase subunit 4 isoform 1, mitochondrial OS=Homo sapiens GN=COX4I1 PE=1 SV=1 - [COX41_HUMAN]	169	19.6	1.025	1.009	1.063	1.099	0.999	9	9	27	27	6.5	27	6.2	27	4.2	27	6.7	27	8.6
P20674	COX5A	Cytochrome c oxidase subunit 5A, mitochondrial	Cytochrome c oxidase subunit 5A, mitochondrial OS=Homo sapiens GN=COX5A PE=1 SV=2 - [COX5A_HUMAN]	150	16.8	1.06	0.954	1.033	1.054	0.983	4	4	10	10	6.8	10	9.9	10	10	10	5.6	10	5.3
P10606	COX5B	Cytochrome c oxidase subunit 5B, mitochondrial	Cytochrome c oxidase subunit 5B, mitochondrial OS=Homo sapiens GN=COX5B PE=1 SV=2 - [COX5B_HUMAN]	129	13.7	1.052	0.935	0.984	1.076	0.978	3	3	5	5	4.1	5	3.1	5	2.2	5	2.9	5	10.9
P14854	COX6B1	Cytochrome c oxidase subunit 6B1	Cytochrome c oxidase subunit 6B1 OS=Homo sapiens GN=COX6B1 PE=1 SV=2 - [CX6B1_HUMAN]	86	10.2	1.064	0.848	0.857	0.913	0.957	7	7	21	21	4.9	21	4.4	21	13.1	21	9.9	21	8.2
P09669	COX6C	Cytochrome c oxidase subunit 6C	Cytochrome c oxidase subunit 6C OS=Homo sapiens GN=COX6C PE=1 SV=2 - [COX6C_HUMAN]	75	8.8	0.984	1.006	0.982	1.074	0.958	3	3	3	3	8.9	3	5.7	3	8.5	3	1.9	3	5.4
P14406	COX7A2	Cytochrome c oxidase subunit 7A2, mitochondrial	Cytochrome c oxidase subunit 7A2, mitochondrial OS=Homo sapiens GN=COX7A2 PE=1 SV=1 - [CX7A2_HUMAN]	83	9.4	1.047	1.084	1.162	1.32	1.034	2	2	4	4	19	4	5.5	4	8.9	4	6.5	4	3.6
E5RJZ1	COX7A2L		Cytochrome c oxidase subunit 7A-related protein, mitochondrial OS=Homo sapiens GN=COX7A2L PE=2 SV=1 - [E5RJZ1_HUMAN]	79	8.8	0.991	1.03	1.202	1.229	1.007	2	2	3	3	0.9	3	1.1	3	5	3	6.3	3	4.4
P24311	COX7B	Cytochrome c oxidase subunit 7B, mitochondrial	Cytochrome c oxidase subunit 7B, mitochondrial OS=Homo sapiens GN=COX7B PE=1 SV=2 - [COX7B_HUMAN]	80	9.2	0.959	0.833	0.902	0.87	0.9	2	2	2	2	5	2	2.3	2	5.4	2	7	2	15.3
D6R9Z7	COX7C		Cytochrome c oxidase subunit 7C, mitochondrial OS=Homo sapiens GN=COX7C PE=2 SV=1 - [D6R9Z7_HUMAN]	56	6.4	1.028	1.098	1.1	1.208	1.184	3	3	8	8	9.4	8	23.9	8	4.3	8	6.6	8	21.2
P10176	COX8A	Cytochrome c oxidase subunit 8A, mitochondrial	Cytochrome c oxidase subunit 8A, mitochondrial OS=Homo sapiens GN=COX8A PE=1 SV=2 - [COX8A_HUMAN]	69	7.6	1.157	0.87	0.784	0.863	1.001	1	1	2	2	1.6	2	10.9	2	5.7	2	19.8	2	11.2
O75976	CPD	Carboxypeptidase D	Carboxypeptidase D OS=Homo sapiens GN=CPD PE=1 SV=2 - [CBPD_HUMAN]	1380	152.8	1.108	1.295	0.926	0.8	1.327	6	6	7	7	7	7	8.2	7	27.2	7	15	7	11
Q9BZB8	CPEB1	Cytoplasmic polyadenylation element-binding protein 1	Cytoplasmic polyadenylation element-binding protein 1 OS=Homo sapiens GN=CPEB1 PE=1 SV=1 - [CPEB1_HUMAN]	566	62.6	1.356	1.153	1.218	1.107	1.059	1	1	1	1	NaN	1	NaN	1	NaN	1	NaN	1	NaN
F2Z2V0	CPNE1		Copine-1 (Fragment) OS=Homo sapiens GN=CPNE1 PE=2 SV=1 - [F2Z2V0_HUMAN]	533	58.6	1.08	0.944	1.142	1.22	0.966	11	11	18	18	10.1	18	6.8	18	8.3	18	7.2	18	5.8
O75131	CPNE3	Copine-3	Copine-3 OS=Homo sapiens GN=CPNE3 PE=1 SV=1 - [CPNE3_HUMAN]	537	60.1	1.028	1.019	1.133	1.163	1.031	15	15	37	37	7.1	37	8.9	37	9.6	37	9.8	37	6.7
P36551	CPOX	Coproporphyrinogen-III oxidase, mitochondrial	Coproporphyrinogen-III oxidase, mitochondrial OS=Homo sapiens GN=CPOX PE=1 SV=3 - [HEM6_HUMAN]	454	50.1	1.011	1.102	1.102	1.037	0.987	14	14	24	24	4.6	24	9.4	24	13.2	24	10.2	24	9.3
Q9BRF8	CPPED1	Calcineurin-like phosphoesterase domain-containing protein 1	Calcineurin-like phosphoesterase domain-containing protein 1 OS=Homo sapiens GN=CPPED1 PE=1 SV=3 - [CPPED_HUMAN]	314	35.5	1.035	1.196	1.334	1.488	1.23	6	6	7	7	12.1	7	14.3	7	5.9	7	11	7	18.8
Q9Y646	CPQ	Carboxypeptidase Q	Carboxypeptidase Q OS=Homo sapiens GN=CPQ PE=1 SV=1 - [CBPQ_HUMAN]	472	51.9	1.021	0.857	0.976	1.037	0.928	3	3	3	3	11.1	3	12.8	3	18.9	3	15	3	0.8
P31327	CPS1	Carbamoyl-phosphate synthase [ammonia], mitochondrial	Carbamoyl-phosphate synthase [ammonia], mitochondrial OS=Homo sapiens GN=CPS1 PE=1 SV=2 - [CPSM_HUMAN]	1500	164.8	0.942	1.042	1.2	1.495	1.175	4	7	9	5	13.7	5	1.3	5	20.1	5	19.4	5	8.4
Q10570	CPSF1	Cleavage and polyadenylation specificity factor subunit 1	Cleavage and polyadenylation specificity factor subunit 1 OS=Homo sapiens GN=CPSF1 PE=1 SV=2 - [CPSF1_HUMAN]	1443	160.8	1.026	0.948	1.001	1.044	1.072	19	19	23	23	5	23	10.2	23	6	23	11.7	23	12
Q9P2I0	CPSF2	Cleavage and polyadenylation specificity factor subunit 2	Cleavage and polyadenylation specificity factor subunit 2 OS=Homo sapiens GN=CPSF2 PE=1 SV=2 - [CPSF2_HUMAN]	782	88.4	0.987	1.006	0.968	1.001	0.996	18	18	25	25	9	25	14.1	25	10.5	25	8	25	8.8
G5E9W3	CPSF3		Cleavage and polyadenylation specific factor 3, 73kDa, isoform CRA_b OS=Homo sapiens GN=CPSF3 PE=2 SV=1 - [G5E9W3_HUMAN]	647	73.4	0.968	1.088	1.105	1.03	1.021	11	11	13	13	3.7	13	8.3	13	8.8	13	6.8	13	8.8
Q5TA45	CPSF3L	Integrator complex subunit 11	Integrator complex subunit 11 OS=Homo sapiens GN=CPSF3L PE=1 SV=2 - [INT11_HUMAN]	600	67.6	0.97	0.99	1.002	1.135	1.01	5	5	5	5	14.5	5	15.5	5	19.7	5	6.8	5	13.5
O95639	CPSF4	Cleavage and polyadenylation specificity factor subunit 4	Cleavage and polyadenylation specificity factor subunit 4 OS=Homo sapiens GN=CPSF4 PE=1 SV=1 - [CPSF4_HUMAN]	269	30.2	1.025	0.902	0.892	0.916	0.977	7	7	12	12	4.4	12	3.4	12	8.1	12	7.8	12	4.1
F8WJN3	CPSF6		Cleavage and polyadenylation-specificity factor subunit 6 OS=Homo sapiens GN=CPSF6 PE=2 SV=1 - [F8WJN3_HUMAN]	478	52.2	1.041	1.071	1.047	1.03	1.057	14	14	35	35	4.6	35	12.1	35	13.1	35	7	35	9.2
Q8N684	CPSF7	Cleavage and polyadenylation specificity factor subunit 7	Cleavage and polyadenylation specificity factor subunit 7 OS=Homo sapiens GN=CPSF7 PE=1 SV=1 - [CPSF7_HUMAN]	471	52	1.021	0.888	0.809	0.839	0.908	13	13	19	19	7.2	19	5.1	19	5.6	19	7.9	19	5.2
P50416	CPT1A	Carnitine O-palmitoyltransferase 1, liver isoform	Carnitine O-palmitoyltransferase 1, liver isoform OS=Homo sapiens GN=CPT1A PE=1 SV=2 - [CPT1A_HUMAN]	773	88.3	1.012	1.07	1.01	0.98	1.064	16	16	22	22	5.7	22	8.6	22	7.5	22	7.6	22	4.6
P23786	CPT2	Carnitine O-palmitoyltransferase 2, mitochondrial	Carnitine O-palmitoyltransferase 2, mitochondrial OS=Homo sapiens GN=CPT2 PE=1 SV=2 - [CPT2_HUMAN]	658	73.7	1.052	0.949	1.086	1.141	0.898	18	18	25	24	4.2	25	7.7	25	5.6	25	6.4	25	12.5
J3QT87	CRBN		Protein cereblon (Fragment) OS=Homo sapiens GN=CRBN PE=4 SV=1 - [J3QT87_HUMAN]	394	45.4	0.944	0.806	0.792	0.806	0.851	4	4	7	7	4	7	6.3	7	18	7	23.2	7	11.7
C9JBT4	CREB1		Cyclic AMP-responsive element-binding protein 1 (Fragment) OS=Homo sapiens GN=CREB1 PE=2 SV=1 - [C9JBT4_HUMAN]	170	18	0.96	0.989	0.985	0.991	1.075	2	2	5	5	3.7	5	4.7	5	8.2	5	3.2	5	9.2
Q92793	CREBBP	CREB-binding protein	CREB-binding protein OS=Homo sapiens GN=CREBBP PE=1 SV=3 - [CBP_HUMAN]	2442	265.2	0.911	1.163	1.031	1.092	0.99	3	7	8	3	1.2	3	4.9	3	11.9	3	6	3	22.3
Q96HD1	CRELD1	Cysteine-rich with EGF-like domain protein 1	Cysteine-rich with EGF-like domain protein 1 OS=Homo sapiens GN=CRELD1 PE=1 SV=3 - [CREL1_HUMAN]	420	45.4	0.989	0.979	0.973	1.173	0.796	3	3	4	4	23.6	4	4.8	4	8	4	9.3	4	7.8
A6PWM2	CRELD2		Cysteine-rich with EGF-like domain protein 2 (Fragment) OS=Homo sapiens GN=CRELD2 PE=2 SV=1 - [A6PWM2_HUMAN]	229	25.1	0.868	0.982	1.144	1.29	1.032	1	1	1	1	NaN	1	NaN	1	NaN	1	NaN	1	NaN
P50238	CRIP1	Cysteine-rich protein 1	Cysteine-rich protein 1 OS=Homo sapiens GN=CRIP1 PE=1 SV=3 - [CRIP1_HUMAN]	77	8.5	1.132	0.8	0.775	0.982	1.217	1	1	1	1	NaN	1	NaN	1	NaN	1	NaN	1	NaN
Q9P021	CRIPT	Cysteine-rich PDZ-binding protein	Cysteine-rich PDZ-binding protein OS=Homo sapiens GN=CRIPT PE=1 SV=1 - [CRIPT_HUMAN]	101	11.2	1.082	1.297	1.33	0.949	1.366	1	1	1	1	NaN	1	NaN	1	NaN	1	NaN	1	NaN
P46108	CRK	Adapter molecule crk	Adapter molecule crk OS=Homo sapiens GN=CRK PE=1 SV=2 - [CRK_HUMAN]	304	33.8	1.014	1.047	1.068	1.406	1.183	7	7	13	13	7.5	13	8.5	13	10.9	13	11.2	13	8.2
P46109	CRKL	Crk-like protein	Crk-like protein OS=Homo sapiens GN=CRKL PE=1 SV=1 - [CRKL_HUMAN]	303	33.8	1.03	0.91	0.91	0.948	0.881	12	12	40	40	6.4	40	9.9	40	12.1	39	8.2	40	10.9
B4DJU5	CRLF3		Cytokine receptor-like factor 3 OS=Homo sapiens GN=CRLF3 PE=2 SV=1 - [B4DJU5_HUMAN]	326	36.4	0.953	0.946	1.083	1.222	1.124	5	5	5	5	11.3	5	11.5	5	9.7	5	5.9	5	10.3
Q5JY65	CRNKL1		Crooked neck-like protein 1 OS=Homo sapiens GN=CRNKL1 PE=2 SV=1 - [Q5JY65_HUMAN]	836	99.1	1.017	1.064	0.871	0.788	0.96	22	22	32	32	7.5	32	11.9	32	11.5	32	8.9	32	11.1
Q5TZA2	CROCC	Rootletin	Rootletin OS=Homo sapiens GN=CROCC PE=1 SV=1 - [CROCC_HUMAN]	2017	228.4	0.984	0.954	0.89	0.904	0.891	4	5	7	5	12.1	5	10.6	5	8.7	5	5.3	5	10
Q9UKG9	CROT	Peroxisomal carnitine O-octanoyltransferase	Peroxisomal carnitine O-octanoyltransferase OS=Homo sapiens GN=CROT PE=1 SV=2 - [OCTC_HUMAN]	612	70.1	0.908	1.294	1.231	1.158	1.091	5	5	7	7	14.3	7	10.8	7	16.4	7	8.6	7	7.9
O75718	CRTAP	Cartilage-associated protein	Cartilage-associated protein OS=Homo sapiens GN=CRTAP PE=1 SV=1 - [CRTAP_HUMAN]	401	46.5	0.933	1.028	1.075	1.24	1.087	9	9	13	13	19.2	13	6.6	13	19.5	13	15.3	13	13.3
Q6UUV9	CRTC1	CREB-regulated transcription coactivator 1	CREB-regulated transcription coactivator 1 OS=Homo sapiens GN=CRTC1 PE=1 SV=2 - [CRTC1_HUMAN]	634	67.3	0.971	0.924	0.866	0.948	1.087	1	1	1	1	NaN	1	NaN	1	NaN	1	NaN	1	NaN
Q53ET0	CRTC2	CREB-regulated transcription coactivator 2	CREB-regulated transcription coactivator 2 OS=Homo sapiens GN=CRTC2 PE=1 SV=2 - [CRTC2_HUMAN]	693	73.3	1.085	0.532	0.812	0.952	0.854	2	2	2	2	13.5	2	58.9	2	18.7	2	71.9	2	11.6
H0YK33	CRTC3		CREB-regulated transcription coactivator 3 OS=Homo sapiens GN=CRTC3 PE=2 SV=1 - [H0YK33_HUMAN]	91	10.2	0.978	1.099	0.972	1.023	0.937	1	1	1	1	NaN	1	NaN	1	NaN	1	NaN	1	NaN
P43320	CRYBB2	Beta-crystallin B2	Beta-crystallin B2 OS=Homo sapiens GN=CRYBB2 PE=1 SV=2 - [CRBB2_HUMAN]	205	23.4	0.988	1.021	0.906	0.955	1.008	1	1	1	1	NaN	1	NaN	1	NaN	1	NaN	1	NaN
Q08257	CRYZ	Quinone oxidoreductase	Quinone oxidoreductase OS=Homo sapiens GN=CRYZ PE=1 SV=1 - [QOR_HUMAN]	329	35.2	1.04	1.001	1.094	1.127	0.972	13	13	30	30	6.1	30	7.8	30	8.2	30	8.5	30	7.8
A6NMA8	CRYZL1		Quinone oxidoreductase-like protein 1 OS=Homo sapiens GN=CRYZL1 PE=2 SV=1 - [A6NMA8_HUMAN]	334	37	0.994	1.062	1.19	1.306	1.18	8	8	9	9	8.5	9	5.3	9	9	9	13	9	14.1
B4DJV2	CS	Citrate synthase	Citrate synthase OS=Homo sapiens GN=CS PE=2 SV=1 - [B4DJV2_HUMAN]	453	50.4	1.03	0.973	0.985	0.996	0.844	11	16	42	25	6.4	25	8.7	25	11.8	25	10.6	25	8.9
H0YIC4	CS	Citrate synthase	Citrate synthase (Fragment) OS=Homo sapiens GN=CS PE=2 SV=1 - [H0YIC4_HUMAN]	123	14.1	0.999	0.927	1.024	0.888	0.78	1	6	18	1	NaN	1	NaN	1	NaN	1	NaN	1	NaN
O75534	CSDE1	Cold shock domain-containing protein E1	Cold shock domain-containing protein E1 OS=Homo sapiens GN=CSDE1 PE=1 SV=2 - [CSDE1_HUMAN]	798	88.8	0.95	0.971	0.785	0.723	0.921	34	34	78	78	6.9	78	8.8	78	11.4	78	10.8	78	12.4
P55060	CSE1L	Exportin-2	Exportin-2 OS=Homo sapiens GN=CSE1L PE=1 SV=3 - [XPO2_HUMAN]	971	110.3	1.013	0.96	0.981	0.991	1.015	28	28	71	70	7.5	69	9.1	69	9.6	70	12.1	69	11.9
E9PKP4	CSF1		Macrophage colony-stimulating factor 1 (Fragment) OS=Homo sapiens GN=CSF1 PE=2 SV=1 - [E9PKP4_HUMAN]	113	13.2	0.855	1.907	0.736	0.533	2.156	1	1	2	2	4.6	2	3.8	2	7.8	2	1.5	2	2.3
Q8N6G5	CSGALNACT2	Chondroitin sulfate N-acetylgalactosaminyltransferase 2	Chondroitin sulfate N-acetylgalactosaminyltransferase 2 OS=Homo sapiens GN=CSGALNACT2 PE=2 SV=1 - [CGAT2_HUMAN]	542	62.5	0.895	1.68	1.271	1.51	1.681	1	1	1	1	NaN	1	NaN	1	NaN	1	NaN	1	NaN
P41240	CSK	Tyrosine-protein kinase CSK	Tyrosine-protein kinase CSK OS=Homo sapiens GN=CSK PE=1 SV=1 - [CSK_HUMAN]	450	50.7	0.955	0.892	0.854	0.868	0.873	18	18	27	27	7.1	27	11.1	27	9.7	27	7.6	27	7.2
H0Y9X2	CSNK1A1		Casein kinase I isoform alpha (Fragment) OS=Homo sapiens GN=CSNK1A1 PE=4 SV=1 - [H0Y9X2_HUMAN]	167	19.4	0.953	0.9	0.878	0.782	0.88	4	4	5	5	21.8	5	10.4	5	12.3	5	36.4	5	19.6
P48730	CSNK1D	Casein kinase I isoform delta	Casein kinase I isoform delta OS=Homo sapiens GN=CSNK1D PE=1 SV=2 - [KC1D_HUMAN]	415	47.3	1.017	1.068	0.74	0.742	0.965	1	6	8	2	27.1	2	3.3	2	35	2	24.4	2	7.4
P49674	CSNK1E	Casein kinase I isoform epsilon	Casein kinase I isoform epsilon OS=Homo sapiens GN=CSNK1E PE=1 SV=1 - [KC1E_HUMAN]	416	47.3	1.019	1.252	0.929	0.89	1.331	1	6	7	1	NaN	1	NaN	1	NaN	1	NaN	1	NaN
Q9HCP0	CSNK1G1	Casein kinase I isoform gamma-1	Casein kinase I isoform gamma-1 OS=Homo sapiens GN=CSNK1G1 PE=1 SV=1 - [KC1G1_HUMAN]	422	48.5	0.933	1.029	0.776	0.681	1.06	5	5	5	5	2.9	5	5.5	5	5.2	5	2.6	5	6.5
Q8NCQ2	CSNK1G2-AS1	Uncharacterized protein CSNK1G2-AS1	Uncharacterized protein CSNK1G2-AS1 OS=Homo sapiens GN=CSNK1G2-AS1 PE=2 SV=2 - [CNAS1_HUMAN]	148	16.1	1.109	1.07	1.206	1.155	1.263	1	1	1	1	NaN	1	NaN	1	NaN	1	NaN	1	NaN
E7EU96	CSNK2A1		Casein kinase II subunit alpha OS=Homo sapiens GN=CSNK2A1 PE=2 SV=1 - [E7EU96_HUMAN]	385	45.3	1.008	0.978	1.037	1.087	0.903	15	16	52	48	5.2	48	8.7	48	12.1	48	7.3	48	9.4
P19784	CSNK2A2	Casein kinase II subunit alpha'	Casein kinase II subunit alpha' OS=Homo sapiens GN=CSNK2A2 PE=1 SV=1 - [CSK22_HUMAN]	350	41.2	1.008	1.026	1.045	1.11	1.037	11	12	19	16	5.9	16	9.1	16	8.2	16	4.5	16	12.9
P67870	CSNK2B	Casein kinase II subunit beta	Casein kinase II subunit beta OS=Homo sapiens GN=CSNK2B PE=1 SV=1 - [CSK2B_HUMAN]	215	24.9	1.032	0.999	1.056	1.12	0.947	8	8	31	31	6	31	13.4	31	15	31	16.8	31	11.2
P21291	CSRP1	Cysteine and glycine-rich protein 1	Cysteine and glycine-rich protein 1 OS=Homo sapiens GN=CSRP1 PE=1 SV=3 - [CSRP1_HUMAN]	193	20.6	0.996	1.067	1.121	1.236	1.216	9	9	34	31	8.5	31	11.2	31	12.4	31	17.4	31	16.5
P04080	CSTB	Cystatin-B	Cystatin-B OS=Homo sapiens GN=CSTB PE=1 SV=2 - [CYTB_HUMAN]	98	11.1	1.001	0.772	1.577	1.104	0.917	4	4	10	10	6	10	11.3	10	21.9	10	19.8	10	14
Q05048	CSTF1	Cleavage stimulation factor subunit 1	Cleavage stimulation factor subunit 1 OS=Homo sapiens GN=CSTF1 PE=1 SV=1 - [CSTF1_HUMAN]	431	48.3	0.995	1.055	1.114	1.053	0.931	11	11	15	15	8.7	15	10.7	15	14.9	15	10.2	15	13.1
P33240	CSTF2	Cleavage stimulation factor subunit 2	Cleavage stimulation factor subunit 2 OS=Homo sapiens GN=CSTF2 PE=1 SV=1 - [CSTF2_HUMAN]	577	60.9	0.969	1.021	0.987	1.009	0.985	7	14	27	14	2.7	14	5.9	14	8.8	14	8.1	14	8.9
Q9H0L4	CSTF2T	Cleavage stimulation factor subunit 2 tau variant	Cleavage stimulation factor subunit 2 tau variant OS=Homo sapiens GN=CSTF2T PE=1 SV=1 - [CSTFT_HUMAN]	616	64.4	0.823	1.015	0.913	1.104	1.102	4	11	17	4	18.9	4	16.3	4	9.5	4	3	4	11.7
Q12996	CSTF3	Cleavage stimulation factor subunit 3	Cleavage stimulation factor subunit 3 OS=Homo sapiens GN=CSTF3 PE=1 SV=1 - [CSTF3_HUMAN]	717	82.9	0.978	1.02	0.991	1.027	0.98	15	15	21	21	5.6	21	4.6	21	10.8	21	6.4	21	6.8
Q13363	CTBP1	C-terminal-binding protein 1	C-terminal-binding protein 1 OS=Homo sapiens GN=CTBP1 PE=1 SV=2 - [CTBP1_HUMAN]	440	47.5	1.035	0.873	0.861	0.921	0.924	9	9	14	14	4.8	14	6.9	14	8.5	14	6	14	3.7
Q01459	CTBS	Di-N-acetylchitobiase	Di-N-acetylchitobiase OS=Homo sapiens GN=CTBS PE=1 SV=1 - [DIAC_HUMAN]	385	43.7	1.122	1.004	1.307	1.487	1.306	2	2	2	2	8.6	2	0.6	2	4.8	2	2.3	2	0.2
Q2NKJ3	CTC1	CST complex subunit CTC1	CST complex subunit CTC1 OS=Homo sapiens GN=CTC1 PE=1 SV=2 - [CTC1_HUMAN]	1217	134.5	1.157	1.898	2.032	1.868	2.28	1	1	1	1	NaN	1	NaN	1	NaN	1	NaN	1	NaN
P49711	CTCF	Transcriptional repressor CTCF	Transcriptional repressor CTCF OS=Homo sapiens GN=CTCF PE=1 SV=1 - [CTCF_HUMAN]	727	82.7	0.96	0.782	0.68	0.666	0.82	20	20	47	45	11.2	45	19.6	45	36.8	45	30.2	45	21.1
I3L2R5	CTDNEP1		CTD nuclear envelope phosphatase 1 OS=Homo sapiens GN=CTDNEP1 PE=2 SV=1 - [I3L2R5_HUMAN]	111	12.7	1.042	1.048	1.005	1.132	0.997	1	1	1	1	NaN	1	NaN	1	NaN	1	NaN	1	NaN
Q9Y5B0	CTDP1	RNA polymerase II subunit A C-terminal domain phosphatase	RNA polymerase II subunit A C-terminal domain phosphatase OS=Homo sapiens GN=CTDP1 PE=1 SV=3 - [CTDP1_HUMAN]	961	104.3	1.051	0.949	0.949	1.016	0.985	6	6	8	8	4.3	8	9.2	8	10	8	6.5	8	7.2
Q05D32	CTDSPL2	CTD small phosphatase-like protein 2	CTD small phosphatase-like protein 2 OS=Homo sapiens GN=CTDSPL2 PE=1 SV=2 - [CTSL2_HUMAN]	466	53	0.993	0.993	0.895	0.845	0.9	12	12	15	14	8.9	15	13.9	14	7.6	14	13.9	15	14.8
P32929	CTH	Cystathionine gamma-lyase	Cystathionine gamma-lyase OS=Homo sapiens GN=CTH PE=1 SV=3 - [CGL_HUMAN]	405	44.5	0.755	0.978	1.182	0.872	0.757	1	1	1	1	NaN	1	NaN	1	NaN	1	NaN	1	NaN
Q96CG8	CTHRC1	Collagen triple helix repeat-containing protein 1	Collagen triple helix repeat-containing protein 1 OS=Homo sapiens GN=CTHRC1 PE=1 SV=1 - [CTHR1_HUMAN]	243	26.2	0.794	1.736	1.686	1.328	1.526	3	3	5	5	14.6	5	7.5	5	0.6	5	8.8	5	5.2
F8W845	CTNNA1		Catenin alpha-1 OS=Homo sapiens GN=CTNNA1 PE=2 SV=1 - [F8W845_HUMAN]	803	88.6	1.011	1.471	1.484	1.533	1.228	14	19	25	16	10.5	16	15.3	16	7.8	16	12.4	16	8.6
P26232	CTNNA2	Catenin alpha-2	Catenin alpha-2 OS=Homo sapiens GN=CTNNA2 PE=1 SV=5 - [CTNA2_HUMAN]	953	105.2	1.002	1.6	1.494	1.45	1.296	1	6	8	1	NaN	1	NaN	1	NaN	1	NaN	1	NaN
B4DGU4	CTNNB1		Catenin beta-1 OS=Homo sapiens GN=CTNNB1 PE=2 SV=1 - [B4DGU4_HUMAN]	774	84.7	1.042	1.367	3.224	3.299	1.054	4	4	4	4	7.2	4	32.3	4	22.2	4	27.4	4	11
Q8WYA6	CTNNBL1	Beta-catenin-like protein 1	Beta-catenin-like protein 1 OS=Homo sapiens GN=CTNNBL1 PE=1 SV=1 - [CTBL1_HUMAN]	563	65.1	0.975	1.01	0.933	0.848	0.925	17	17	30	30	9.3	30	13.1	30	20.5	30	13.5	30	12.5
P17812	CTPS1	CTP synthase 1	CTP synthase 1 OS=Homo sapiens GN=CTPS1 PE=1 SV=2 - [PYRG1_HUMAN]	591	66.6	0.992	0.936	0.898	0.841	0.967	20	20	34	33	5.4	33	8.7	33	7.3	33	8.5	33	9.5
Q6PD62	CTR9	RNA polymerase-associated protein CTR9 homolog	RNA polymerase-associated protein CTR9 homolog OS=Homo sapiens GN=CTR9 PE=1 SV=1 - [CTR9_HUMAN]	1173	133.4	0.987	1.009	0.936	0.914	0.992	18	18	26	26	10.4	26	4.8	26	8.7	26	11	26	7.3
P10619	CTSA	Lysosomal protective protein;Lysosomal protective protein 20 kDa chain;Lysosomal protective protein 32 kDa chain	Lysosomal protective protein OS=Homo sapiens GN=CTSA PE=1 SV=2 - [PPGB_HUMAN]	480	54.4	1.008	1.07	1.11	1.191	1.097	6	6	9	9	8.7	9	18.1	9	15.9	9	7.5	9	16.2
P07858	CTSB	Cathepsin B;Cathepsin B heavy chain;Cathepsin B light chain	Cathepsin B OS=Homo sapiens GN=CTSB PE=1 SV=3 - [CATB_HUMAN]	339	37.8	1.105	0.985	1.265	1.557	1.366	4	4	7	7	12	7	8.2	7	16.3	7	3.8	7	17.3
P53634	CTSC	Dipeptidyl peptidase 1;Dipeptidyl peptidase 1 exclusion domain chain;Dipeptidyl peptidase 1 heavy chain;Dipeptidyl peptidase 1 light chain	Dipeptidyl peptidase 1 OS=Homo sapiens GN=CTSC PE=1 SV=2 - [CATC_HUMAN]	463	51.8	1.019	1.015	1.066	1.21	1.182	8	8	20	20	5.6	20	6.1	20	13.6	20	11.4	20	8.5
P07339	CTSD	Cathepsin D;Cathepsin D heavy chain;Cathepsin D light chain	Cathepsin D OS=Homo sapiens GN=CTSD PE=1 SV=1 - [CATD_HUMAN]	412	44.5	0.967	1.269	1.58	1.759	1.542	13	13	48	47	7.5	47	7.3	47	8.2	47	7	47	9.5
P56202	CTSW	Cathepsin W	Cathepsin W OS=Homo sapiens GN=CTSW PE=1 SV=2 - [CATW_HUMAN]	376	42.1	0.971	0.931	0.858	0.935	1.029	4	4	5	5	21.5	5	10.8	5	7.8	5	1.5	5	14.1
Q14247	CTTN	Src substrate cortactin	Src substrate cortactin OS=Homo sapiens GN=CTTN PE=1 SV=2 - [SRC8_HUMAN]	550	61.5	0.967	1.072	1.055	1.659	1.14	3	3	3	3	21.4	3	29.9	3	9.8	3	0.4	3	27.4
Q2VPK5	CTU2	Cytoplasmic tRNA 2-thiolation protein 2	Cytoplasmic tRNA 2-thiolation protein 2 OS=Homo sapiens GN=CTU2 PE=1 SV=1 - [CTU2_HUMAN]	515	56.1	0.83	0.908	0.908	0.903	0.869	1	1	1	1	NaN	1	NaN	1	NaN	1	NaN	1	NaN
Q9H467	CUEDC2	CUE domain-containing protein 2	CUE domain-containing protein 2 OS=Homo sapiens GN=CUEDC2 PE=1 SV=1 - [CUED2_HUMAN]	287	32	0.754	1.218	1.231	1.15	1.198	2	2	2	2	3.6	2	22.3	2	18.8	2	12.6	2	0.4
Q13616	CUL1	Cullin-1	Cullin-1 OS=Homo sapiens GN=CUL1 PE=1 SV=2 - [CUL1_HUMAN]	776	89.6	1.033	1.173	1.314	1.436	1.32	21	21	30	30	6.8	30	14.4	30	5.9	29	9.4	30	16.3
Q13617	CUL2	Cullin-2	Cullin-2 OS=Homo sapiens GN=CUL2 PE=1 SV=2 - [CUL2_HUMAN]	745	86.9	1.066	0.954	0.946	1.011	0.917	24	25	37	35	7	35	13.9	35	14.3	35	13.2	35	7.5
Q13618	CUL3	Cullin-3	Cullin-3 OS=Homo sapiens GN=CUL3 PE=1 SV=2 - [CUL3_HUMAN]	768	88.9	0.965	0.951	0.942	0.917	0.851	23	23	38	38	7	38	3.8	38	7.4	38	5.3	38	6.5
Q13619	CUL4A	Cullin-4A	Cullin-4A OS=Homo sapiens GN=CUL4A PE=1 SV=3 - [CUL4A_HUMAN]	759	87.6	0.987	0.952	0.848	0.822	0.928	14	24	28	16	7.3	16	7.4	16	9.6	16	10.4	16	8.2
K4DI93	CUL4B		Cullin 4B, isoform CRA_e OS=Homo sapiens GN=CUL4B PE=3 SV=1 - [K4DI93_HUMAN]	900	102.7	1.011	1.007	1.126	1.104	1.121	17	27	40	27	7.4	27	8.4	27	10.4	27	11.8	27	9.5
Q93034	CUL5	Cullin-5	Cullin-5 OS=Homo sapiens GN=CUL5 PE=1 SV=4 - [CUL5_HUMAN]	780	90.9	0.988	0.993	1.08	1.181	1.117	14	14	20	20	9.5	20	9.3	20	6.3	20	8.6	20	9.6
E9PEZ1	CUL9		Cullin-9 OS=Homo sapiens GN=CUL9 PE=2 SV=1 - [E9PEZ1_HUMAN]	2489	278	0.612	1.141	1.807	1.909	1.32	1	1	1	1	NaN	1	NaN	1	NaN	1	NaN	1	NaN
O60888	CUTA	Protein CutA	Protein CutA OS=Homo sapiens GN=CUTA PE=1 SV=2 - [CUTA_HUMAN]	179	19.1	1.017	0.965	0.945	1.002	0.943	4	4	14	14	6.8	14	11.3	14	16.4	14	12.1	14	6.5
Q9NTM9	CUTC	Copper homeostasis protein cutC homolog	Copper homeostasis protein cutC homolog OS=Homo sapiens GN=CUTC PE=1 SV=1 - [CUTC_HUMAN]	273	29.3	1.034	0.968	0.883	0.89	0.92	7	7	13	13	5.1	13	8	13	12.7	13	9.1	13	12
P39880	CUX1	Homeobox protein cut-like 1	Homeobox protein cut-like 1 OS=Homo sapiens GN=CUX1 PE=1 SV=3 - [CUX1_HUMAN]	1505	164.1	1.029	0.978	1.065	1.023	1.08	5	18	26	6	10.9	6	6.3	6	11.2	6	22.1	6	13.2
Q13948	CUX1	Protein CASP	Protein CASP OS=Homo sapiens GN=CUX1 PE=1 SV=2 - [CASP_HUMAN]	678	77.4	1.07	1.034	0.892	1.096	1.063	1	14	21	1	NaN	1	NaN	1	NaN	1	NaN	1	NaN
Q9P013	CWC15	Spliceosome-associated protein CWC15 homolog	Spliceosome-associated protein CWC15 homolog OS=Homo sapiens GN=CWC15 PE=1 SV=2 - [CWC15_HUMAN]	229	26.6	0.999	0.931	0.798	0.834	0.993	4	4	6	6	4.6	6	4	6	4.7	6	7.7	6	2.3
B7WP27	CWC22		Pre-mRNA-splicing factor CWC22 homolog OS=Homo sapiens GN=CWC22 PE=2 SV=1 - [B7WP27_HUMAN]	908	105.5	0.973	1.019	0.944	0.866	0.928	12	12	15	15	8.9	15	2.9	15	14.4	15	20.8	15	10.5
Q6UX04	CWC27	Peptidyl-prolyl cis-trans isomerase CWC27 homolog	Peptidyl-prolyl cis-trans isomerase CWC27 homolog OS=Homo sapiens GN=CWC27 PE=1 SV=1 - [CWC27_HUMAN]	472	53.8	1.001	1.124	1.07	0.986	0.894	13	13	34	32	11.1	32	14.6	32	19.9	32	18.9	32	15.4
Q69YN2	CWF19L1	CWF19-like protein 1	CWF19-like protein 1 OS=Homo sapiens GN=CWF19L1 PE=1 SV=2 - [C19L1_HUMAN]	538	60.6	1.034	0.996	0.978	0.941	0.978	14	15	20	19	12.6	19	9.2	19	12.4	19	8.3	19	10.7
Q2TBE0	CWF19L2	CWF19-like protein 2	CWF19-like protein 2 OS=Homo sapiens GN=CWF19L2 PE=1 SV=4 - [C19L2_HUMAN]	894	103.7	0.953	1.01	0.976	0.92	1.081	10	10	11	11	6.4	11	8.9	11	8.7	11	12	11	9.4
P78310	CXADR	Coxsackievirus and adenovirus receptor	Coxsackievirus and adenovirus receptor OS=Homo sapiens GN=CXADR PE=1 SV=1 - [CXAR_HUMAN]	365	40	1.098	1.624	1.416	1.904	2.465	1	1	1	1	NaN	1	NaN	1	NaN	1	NaN	1	NaN
P61073	CXCR4	C-X-C chemokine receptor type 4	C-X-C chemokine receptor type 4 OS=Homo sapiens GN=CXCR4 PE=1 SV=1 - [CXCR4_HUMAN]	352	39.7	0.981	1.484	0.719	0.324	1.93	3	3	3	3	41.7	3	10.2	3	55.6	3	40.3	3	60.3
Q8TB03	CXorf38	Uncharacterized protein CXorf38	Uncharacterized protein CXorf38 OS=Homo sapiens GN=CXorf38 PE=1 SV=1 - [CX038_HUMAN]	319	36.6	1.063	1.032	1.051	0.997	0.925	9	9	15	15	12.2	15	21.6	15	17.1	15	15.9	15	21.6
Q9H5V9	CXorf56	UPF0428 protein CXorf56	UPF0428 protein CXorf56 OS=Homo sapiens GN=CXorf56 PE=1 SV=1 - [CX056_HUMAN]	222	25.6	0.98	0.883	0.664	0.626	0.871	2	2	3	3	10.7	3	1.1	3	2.8	3	5.8	3	4.6
Q6NSI4	CXorf57	Uncharacterized protein CXorf57	Uncharacterized protein CXorf57 OS=Homo sapiens GN=CXorf57 PE=1 SV=2 - [CX057_HUMAN]	855	97.5	1.126	1.547	1.292	1.191	1.473	1	1	2	2	6.5	2	13.3	2	13.1	2	2.2	2	0.4
Q9P0U4	CXXC1	CpG-binding protein	CpG-binding protein OS=Homo sapiens GN=CXXC1 PE=1 SV=2 - [CXXC1_HUMAN]	656	75.7	0.885	0.93	0.886	0.87	0.959	4	4	4	4	0.7	4	2.1	4	3	4	2.5	4	5.3
D6R966	CXXC5		CXXC-type zinc finger protein 5 (Fragment) OS=Homo sapiens GN=CXXC5 PE=2 SV=1 - [D6R966_HUMAN]	73	6.8	0.872	1.086	1.015	0.977	1.082	1	1	1	1	NaN	1	NaN	1	NaN	1	NaN	1	NaN
D6RFH4	CYB5B		Cytochrome b5 type B OS=Homo sapiens GN=CYB5B PE=2 SV=1 - [D6RFH4_HUMAN]	131	14.8	1.004	1.168	1.461	1.43	1.106	2	2	3	3	2.9	3	18.3	3	0.4	3	3.8	3	6.5
Q9UHQ9	CYB5R1	NADH-cytochrome b5 reductase 1	NADH-cytochrome b5 reductase 1 OS=Homo sapiens GN=CYB5R1 PE=1 SV=1 - [NB5R1_HUMAN]	305	34.1	1.082	1.236	1.706	2.112	1.396	5	5	7	6	1.7	6	20.3	6	5.8	6	13.6	6	17.1
P00387	CYB5R3	NADH-cytochrome b5 reductase 3;NADH-cytochrome b5 reductase 3 membrane-bound form;NADH-cytochrome b5 reductase 3 soluble form	NADH-cytochrome b5 reductase 3 OS=Homo sapiens GN=CYB5R3 PE=1 SV=3 - [NB5R3_HUMAN]	301	34.2	1.052	0.983	1.17	1.358	1.008	9	9	25	25	7.3	25	10.7	25	10.8	25	14.1	25	16.1
P13498	CYBA	Cytochrome b-245 light chain	Cytochrome b-245 light chain OS=Homo sapiens GN=CYBA PE=1 SV=3 - [CY24A_HUMAN]	195	21	1.108	0.816	0.822	0.815	0.987	2	2	6	6	4.5	6	5.8	6	5.7	6	7.4	6	7.7
Q53TN4	CYBRD1	Cytochrome b reductase 1	Cytochrome b reductase 1 OS=Homo sapiens GN=CYBRD1 PE=1 SV=1 - [CYBR1_HUMAN]	286	31.6	0.775	0.763	0.96	0.894	0.836	1	1	1	1	NaN	1	NaN	1	NaN	1	NaN	1	NaN
P08574	CYC1	Cytochrome c1, heme protein, mitochondrial	Cytochrome c1, heme protein, mitochondrial OS=Homo sapiens GN=CYC1 PE=1 SV=3 - [CY1_HUMAN]	325	35.4	0.986	1.04	1.069	1.012	0.956	6	6	17	16	7.4	16	15.9	16	14.2	16	12.3	16	16.4
C9JFR7	CYCS		Cytochrome c (Fragment) OS=Homo sapiens GN=CYCS PE=2 SV=1 - [C9JFR7_HUMAN]	101	11.3	1.034	1.133	1.028	1.069	0.926	5	5	16	16	3.3	16	7.6	16	18.9	16	17.9	16	16.8
E7EVJ5	CYFIP2		Cytoplasmic FMR1-interacting protein 2 OS=Homo sapiens GN=CYFIP2 PE=2 SV=1 - [E7EVJ5_HUMAN]	1227	142.5	1.026	0.915	1.014	1.048	1.052	30	30	61	60	8.9	60	9.9	60	13.3	60	10.7	60	10.6
Q6ZMK1	CYHR1	Cysteine and histidine-rich protein 1	Cysteine and histidine-rich protein 1 OS=Homo sapiens GN=CYHR1 PE=2 SV=2 - [CYHR1_HUMAN]	362	40.7	1.049	1.519	1.286	1.293	1.788	1	1	1	1	NaN	1	NaN	1	NaN	1	NaN	1	NaN
Q6UW02	CYP20A1	Cytochrome P450 20A1	Cytochrome P450 20A1 OS=Homo sapiens GN=CYP20A1 PE=2 SV=1 - [CP20A_HUMAN]	462	52.4	1.021	1.015	0.997	1.072	1.084	4	4	8	8	8.2	8	10.9	8	6.1	8	7.7	8	11.1
P24462	CYP3A7	Cytochrome P450 3A7	Cytochrome P450 3A7 OS=Homo sapiens GN=CYP3A7 PE=1 SV=2 - [CP3A7_HUMAN]	503	57.5	1.02	0.791	0.908	1.034	0.947	1	1	1	1	NaN	1	NaN	1	NaN	1	NaN	1	NaN
Q16850	CYP51A1	Lanosterol 14-alpha demethylase	Lanosterol 14-alpha demethylase OS=Homo sapiens GN=CYP51A1 PE=1 SV=3 - [CP51A_HUMAN]	503	56.8	1.056	1.115	1.752	1.076	0.883	6	6	8	8	5.7	8	8.6	8	3.6	8	9.1	8	11
Q9H1C7	CYSTM1	Cysteine-rich and transmembrane domain-containing protein 1	Cysteine-rich and transmembrane domain-containing protein 1 OS=Homo sapiens GN=CYSTM1 PE=1 SV=1 - [CYTM1_HUMAN]	97	10.6	0.99	1.102	1.127	1	1.101	1	1	1	1	NaN	1	NaN	1	NaN	1	NaN	1	NaN
Q15438	CYTH1	Cytohesin-1	Cytohesin-1 OS=Homo sapiens GN=CYTH1 PE=1 SV=1 - [CYH1_HUMAN]	398	46.4	0.964	1.133	1.122	1.236	0.876	4	6	7	5	5	5	23	5	39.5	5	42.6	5	22.1
B4E3L6	D2HGDH		D-2-hydroxyglutarate dehydrogenase, mitochondrial OS=Homo sapiens GN=D2HGDH PE=2 SV=1 - [B4E3L6_HUMAN]	319	34.2	1.047	0.915	0.845	0.831	0.837	3	3	3	3	1.3	3	15.7	3	1.5	3	0.9	3	13.5
Q9Y4D1	DAAM1	Disheveled-associated activator of morphogenesis 1	Disheveled-associated activator of morphogenesis 1 OS=Homo sapiens GN=DAAM1 PE=1 SV=2 - [DAAM1_HUMAN]	1078	123.4	0.989	1.84	1.419	1.204	1.948	1	1	1	1	NaN	1	NaN	1	NaN	1	NaN	1	NaN
P98082	DAB2	Disabled homolog 2	Disabled homolog 2 OS=Homo sapiens GN=DAB2 PE=1 SV=3 - [DAB2_HUMAN]	770	82.4	0.87	1.257	0.854	0.987	0.905	2	2	2	2	3.4	2	32.7	2	39.7	2	9.2	2	76.4
Q9UI36	DACH1	Dachshund homolog 1	Dachshund homolog 1 OS=Homo sapiens GN=DACH1 PE=1 SV=3 - [DACH1_HUMAN]	760	78.6	1.031	1.296	1.315	1.34	1.371	4	4	4	4	4.8	4	12.7	4	5	4	5.9	4	3.9
F5GXX5	DAD1		Dolichyl-diphosphooligosaccharide--protein glycosyltransferase subunit DAD1 OS=Homo sapiens GN=DAD1 PE=2 SV=1 - [F5GXX5_HUMAN]	85	9.5	1.046	1.069	1.151	1.181	1.009	3	3	6	6	3	6	6.8	6	6.1	6	2.5	6	9.2
E7ET49	DAGLB		Sn1-specific diacylglycerol lipase beta OS=Homo sapiens GN=DAGLB PE=2 SV=1 - [E7ET49_HUMAN]	631	68.9	0.959	1.031	1.056	1.194	1.19	5	5	5	5	12.5	5	1.7	5	8.5	5	6.1	5	6.1
Q3LXA3	DAK	ATP-dependent dihydroxyacetone kinase;Bifunctional ATP-dependent dihydroxyacetone kinase/FAD-AMP lyase (cyclizing);FAD-AMP lyase (cyclizing)	Bifunctional ATP-dependent dihydroxyacetone kinase/FAD-AMP lyase (cyclizing) OS=Homo sapiens GN=DAK PE=1 SV=2 - [DHAK_HUMAN]	575	58.9	1.017	0.915	1.067	1.226	1.072	15	15	24	24	9.2	24	8	24	7.1	24	6.7	24	7.9
P51397	DAP	Death-associated protein 1	Death-associated protein 1 OS=Homo sapiens GN=DAP PE=1 SV=3 - [DAP1_HUMAN]	102	11.2	1.21	0.978	0.705	1.209	1.295	2	2	8	8	7.9	8	5.4	8	3.9	8	11.4	8	13.4
P51398	DAP3	28S ribosomal protein S29, mitochondrial	28S ribosomal protein S29, mitochondrial OS=Homo sapiens GN=DAP3 PE=1 SV=1 - [RT29_HUMAN]	398	45.5	1.001	1.044	0.985	0.917	0.907	13	13	21	21	8.9	21	7	21	8.6	21	10	21	11.5
B7ZLE7	DAPK1		DAPK1 protein OS=Homo sapiens GN=DAPK1 PE=2 SV=1 - [B7ZLE7_HUMAN]	1364	152.4	1.106	0.973	1.404	1.441	1.07	2	2	2	1	NaN	1	NaN	1	NaN	1	NaN	1	NaN
P14868	DARS	Aspartate--tRNA ligase, cytoplasmic	Aspartate--tRNA ligase, cytoplasmic OS=Homo sapiens GN=DARS PE=1 SV=2 - [SYDC_HUMAN]	501	57.1	1.029	0.933	1.029	1	0.838	25	25	58	58	5.9	58	8.1	58	13	58	9.3	58	9.9
Q6PI48	DARS2	Aspartate--tRNA ligase, mitochondrial	Aspartate--tRNA ligase, mitochondrial OS=Homo sapiens GN=DARS2 PE=1 SV=1 - [SYDM_HUMAN]	645	73.5	1.004	0.989	1.116	1.15	0.909	12	12	20	20	9.8	20	5.4	20	6.2	20	10.7	20	8
Q9UER7	DAXX	Death domain-associated protein 6	Death domain-associated protein 6 OS=Homo sapiens GN=DAXX PE=1 SV=2 - [DAXX_HUMAN]	740	81.3	0.987	0.98	0.923	0.896	1.008	4	4	4	4	4.3	4	4.8	4	18	4	12.4	4	11.9
Q96EP5	DAZAP1	DAZ-associated protein 1	DAZ-associated protein 1 OS=Homo sapiens GN=DAZAP1 PE=1 SV=1 - [DAZP1_HUMAN]	407	43.4	1.025	1.017	1.023	0.947	0.935	7	7	30	28	7.5	28	7.2	28	7.2	28	7.7	28	4.7
P07108	DBI	Acyl-CoA-binding protein	Acyl-CoA-binding protein OS=Homo sapiens GN=DBI PE=1 SV=2 - [ACBP_HUMAN]	87	10	1.027	1.192	1.555	1.59	1.449	6	6	13	13	7.1	13	7.4	13	7.1	13	10.1	13	13.3
Q16643	DBN1	Drebrin	Drebrin OS=Homo sapiens GN=DBN1 PE=1 SV=4 - [DREB_HUMAN]	649	71.4	0.997	0.994	1.039	1.073	1.242	18	18	41	41	7	41	14.7	41	12.1	41	17.9	41	11.1
Q9UJU6	DBNL	Drebrin-like protein	Drebrin-like protein OS=Homo sapiens GN=DBNL PE=1 SV=1 - [DBNL_HUMAN]	430	48.2	1.034	0.997	1.146	1.238	1.101	13	13	28	28	13.9	28	10.2	28	9.7	28	12.7	28	9.1
Q9UK59	DBR1	Lariat debranching enzyme	Lariat debranching enzyme OS=Homo sapiens GN=DBR1 PE=1 SV=2 - [DBR1_HUMAN]	544	61.5	1.007	1.096	1.019	1.039	1.075	11	11	21	21	11.2	21	16.3	21	10.8	21	11.7	21	13.6
P11182	DBT	Lipoamide acyltransferase component of branched-chain alpha-keto acid dehydrogenase complex, mitochondrial	Lipoamide acyltransferase component of branched-chain alpha-keto acid dehydrogenase complex, mitochondrial OS=Homo sapiens GN=DBT PE=1 SV=3 - [ODB2_HUMAN]	482	53.5	0.979	0.927	1.063	1.218	0.861	15	15	18	18	5.3	18	6.2	18	9.6	18	13.7	18	8.1
Q8TEB1	DCAF11	DDB1- and CUL4-associated factor 11	DDB1- and CUL4-associated factor 11 OS=Homo sapiens GN=DCAF11 PE=1 SV=1 - [DCA11_HUMAN]	546	61.6	1.118	1.017	1.174	1.163	0.855	2	2	2	2	1.5	2	8.2	2	1.6	2	9	2	4.1
Q9NV06	DCAF13	DDB1- and CUL4-associated factor 13	DDB1- and CUL4-associated factor 13 OS=Homo sapiens GN=DCAF13 PE=1 SV=2 - [DCA13_HUMAN]	445	51.4	0.889	0.897	0.636	0.475	0.773	14	14	16	16	5.7	16	8.4	16	14.3	16	7.8	16	12.7
Q66K64	DCAF15	DDB1- and CUL4-associated factor 15	DDB1- and CUL4-associated factor 15 OS=Homo sapiens GN=DCAF15 PE=1 SV=1 - [DCA15_HUMAN]	600	66.4	1.019	1.065	0.83	0.77	0.838	1	2	2	1	NaN	1	NaN	1	NaN	1	NaN	1	NaN
Q9NXF7	DCAF16	DDB1- and CUL4-associated factor 16	DDB1- and CUL4-associated factor 16 OS=Homo sapiens GN=DCAF16 PE=1 SV=1 - [DCA16_HUMAN]	216	24.2	1	1.175	0.924	0.751	1.242	3	3	3	3	2.5	3	0.1	3	5.8	3	12.3	3	7.2
G3V4J7	DCAF5		DDB1- and CUL4-associated factor 5 OS=Homo sapiens GN=DCAF5 PE=2 SV=1 - [G3V4J7_HUMAN]	941	103.8	1.012	1.113	0.988	1.027	1.183	2	2	3	3	6.4	3	13	3	1.3	3	1.8	3	5.2
Q58WW2	DCAF6	DDB1- and CUL4-associated factor 6	DDB1- and CUL4-associated factor 6 OS=Homo sapiens GN=DCAF6 PE=1 SV=1 - [DCAF6_HUMAN]	860	96.2	1.232	1.207	1.039	1.13	1.19	1	1	1	1	NaN	1	NaN	1	NaN	1	NaN	1	NaN
P61962	DCAF7	DDB1- and CUL4-associated factor 7	DDB1- and CUL4-associated factor 7 OS=Homo sapiens GN=DCAF7 PE=1 SV=1 - [DCAF7_HUMAN]	342	38.9	0.903	0.886	0.781	0.847	0.921	9	9	18	18	9.2	18	7	18	6.2	18	10.4	18	9.6
G3V3G9	DCAF8		DDB1- and CUL4-associated factor 8 OS=Homo sapiens GN=DCAF8 PE=4 SV=1 - [G3V3G9_HUMAN]	751	84.7	1.01	1.142	1.652	1.63	1.094	4	8	12	4	3.8	4	5.4	4	7.9	4	12.5	4	8.1
Q9UHG0	DCDC2	Doublecortin domain-containing protein 2	Doublecortin domain-containing protein 2 OS=Homo sapiens GN=DCDC2 PE=1 SV=2 - [DCDC2_HUMAN]	476	52.8	1.044	0.915	0.801	0.909	1.003	1	1	1	1	NaN	1	NaN	1	NaN	1	NaN	1	NaN
P27707	DCK	Deoxycytidine kinase	Deoxycytidine kinase OS=Homo sapiens GN=DCK PE=1 SV=1 - [DCK_HUMAN]	260	30.5	1.017	0.917	0.98	1.071	0.98	10	10	20	19	3.8	20	11.1	20	14.9	19	11.3	20	5.5
Q9H816	DCLRE1B	5' exonuclease Apollo	5' exonuclease Apollo OS=Homo sapiens GN=DCLRE1B PE=1 SV=1 - [DCR1B_HUMAN]	532	60	0.915	0.924	1.073	0.973	0.775	1	1	1	1	NaN	1	NaN	1	NaN	1	NaN	1	NaN
Q9NPI6	DCP1A	mRNA-decapping enzyme 1A	mRNA-decapping enzyme 1A OS=Homo sapiens GN=DCP1A PE=1 SV=2 - [DCP1A_HUMAN]	582	63.3	1.011	1	0.964	0.878	0.871	13	13	16	16	10.6	16	6	16	14.2	16	13.4	16	11.8
Q8IZD4	DCP1B	mRNA-decapping enzyme 1B	mRNA-decapping enzyme 1B OS=Homo sapiens GN=DCP1B PE=1 SV=2 - [DCP1B_HUMAN]	617	67.7	0.991	1.192	0.846	0.783	1.142	4	4	4	4	12.4	4	10.6	4	5.2	4	13.1	4	8.6
Q8IU60	DCP2	m7GpppN-mRNA hydrolase	m7GpppN-mRNA hydrolase OS=Homo sapiens GN=DCP2 PE=1 SV=2 - [DCP2_HUMAN]	420	48.4	0.933	1.081	1.026	1.049	0.944	5	5	5	5	7.4	5	17.4	5	9.7	5	15	5	10.9
Q96C86	DCPS	m7GpppX diphosphatase	m7GpppX diphosphatase OS=Homo sapiens GN=DCPS PE=1 SV=2 - [DCPS_HUMAN]	337	38.6	1.043	0.969	0.9	0.931	0.97	8	8	16	16	8.1	16	10	16	13.2	16	12.6	16	3.8
P32321	DCTD	Deoxycytidylate deaminase	Deoxycytidylate deaminase OS=Homo sapiens GN=DCTD PE=1 SV=2 - [DCTD_HUMAN]	178	20	0.89	0.934	0.958	1.058	0.914	6	6	9	9	3.9	9	6.4	9	17.3	9	5.8	9	8.8
E7EX90	DCTN1		Dynactin subunit 1 OS=Homo sapiens GN=DCTN1 PE=2 SV=1 - [E7EX90_HUMAN]	1256	139	1.001	1.016	1.152	1.243	1.111	40	41	78	77	8	77	8.8	77	9.3	77	8.4	77	12.2
Q13561	DCTN2	Dynactin subunit 2	Dynactin subunit 2 OS=Homo sapiens GN=DCTN2 PE=1 SV=4 - [DCTN2_HUMAN]	401	44.2	1.03	1.025	1.194	1.237	1.162	19	19	48	48	4.9	48	8.4	48	12.7	48	10.7	48	10.1
O75935	DCTN3	Dynactin subunit 3	Dynactin subunit 3 OS=Homo sapiens GN=DCTN3 PE=1 SV=1 - [DCTN3_HUMAN]	186	21.1	1.015	0.94	1.115	1.204	1.032	6	6	10	10	3.5	10	9.3	10	7	10	10.2	10	10
Q9UJW0	DCTN4	Dynactin subunit 4	Dynactin subunit 4 OS=Homo sapiens GN=DCTN4 PE=1 SV=1 - [DCTN4_HUMAN]	460	52.3	1.006	1.032	1.03	1.175	1.038	10	10	18	18	7.2	18	13.7	18	6.8	18	10.2	18	9.7
H3BR94	DCTN5		Dynactin subunit 5 OS=Homo sapiens GN=DCTN5 PE=2 SV=1 - [H3BR94_HUMAN]	155	16.9	0.949	0.811	0.973	1.043	0.923	2	2	2	2	15.3	2	1.8	2	8.2	2	1	2	6.4
E5RK00	DCTN6		Dynactin subunit 6 OS=Homo sapiens GN=DCTN6 PE=2 SV=1 - [E5RK00_HUMAN]	170	18.4	1.145	0.882	0.95	1.078	1.032	4	4	5	5	17	5	24.5	5	18.8	5	15.6	5	13.2
Q9H773	DCTPP1	dCTP pyrophosphatase 1	dCTP pyrophosphatase 1 OS=Homo sapiens GN=DCTPP1 PE=1 SV=1 - [DCTP1_HUMAN]	170	18.7	0.985	0.884	0.762	0.686	0.874	7	7	12	12	8.6	12	8.1	12	7.3	12	15.6	12	19.7
Q96GG9	DCUN1D1	DCN1-like protein 1	DCN1-like protein 1 OS=Homo sapiens GN=DCUN1D1 PE=1 SV=1 - [DCNL1_HUMAN]	259	30.1	1.004	0.966	1.043	1.118	1.03	7	8	19	17	6.4	17	13.1	17	11.8	17	10.3	17	12.5
Q9BTE7	DCUN1D5	DCN1-like protein 5	DCN1-like protein 5 OS=Homo sapiens GN=DCUN1D5 PE=1 SV=1 - [DCNL5_HUMAN]	237	27.5	0.955	0.933	0.709	0.624	0.809	7	7	9	9	4.8	9	9.5	9	10.9	9	9.4	9	12.2
J3KS22	DCXR		L-xylulose reductase (Fragment) OS=Homo sapiens GN=DCXR PE=3 SV=1 - [J3KS22_HUMAN]	224	23.9	1.013	0.891	1.02	1.012	0.963	7	7	10	10	4.9	10	3.4	10	4.7	10	8.9	10	10.5
Q9BW61	DDA1	DET1- and DDB1-associated protein 1	DET1- and DDB1-associated protein 1 OS=Homo sapiens GN=DDA1 PE=1 SV=1 - [DDA1_HUMAN]	102	11.8	0.998	0.807	0.514	0.505	0.718	3	3	4	4	3.3	4	2.7	4	5	4	7.9	4	2.9
O95865	DDAH2	N(G),N(G)-dimethylarginine dimethylaminohydrolase 2	N(G),N(G)-dimethylarginine dimethylaminohydrolase 2 OS=Homo sapiens GN=DDAH2 PE=1 SV=1 - [DDAH2_HUMAN]	285	29.6	1.056	1.136	1.45	1.584	1.83	7	7	12	12	7.7	12	14.7	12	12.6	12	8.9	12	8.2
Q16531	DDB1	DNA damage-binding protein 1	DNA damage-binding protein 1 OS=Homo sapiens GN=DDB1 PE=1 SV=1 - [DDB1_HUMAN]	1140	126.9	1.04	0.987	0.927	0.85	0.954	35	35	71	71	8.6	70	9.4	71	13.3	70	9	71	11.6
Q92466	DDB2	DNA damage-binding protein 2	DNA damage-binding protein 2 OS=Homo sapiens GN=DDB2 PE=1 SV=1 - [DDB2_HUMAN]	427	47.8	1.116	0.972	1.106	1.062	0.808	4	4	5	5	3.6	5	12.9	5	9.9	5	21.3	5	5
Q8NEL9	DDHD1	Phospholipase DDHD1	Phospholipase DDHD1 OS=Homo sapiens GN=DDHD1 PE=1 SV=2 - [DDHD1_HUMAN]	900	100.4	0.918	0.938	0.965	1.07	1.007	3	3	4	4	7.5	4	8.5	4	6.4	4	6.4	4	9.6
O94830	DDHD2	Phospholipase DDHD2	Phospholipase DDHD2 OS=Homo sapiens GN=DDHD2 PE=1 SV=2 - [DDHD2_HUMAN]	711	81	1.001	1.043	1.034	1.068	1.049	7	7	8	8	9.9	8	15.7	8	18.9	8	11.7	8	5.9
Q5TDH0	DDI2	Protein DDI1 homolog 2	Protein DDI1 homolog 2 OS=Homo sapiens GN=DDI2 PE=1 SV=1 - [DDI2_HUMAN]	399	44.5	0.96	0.971	0.963	1.015	0.989	11	11	22	22	4	22	7.6	22	11.2	22	12.8	22	10.4
P39656	DDOST	Dolichyl-diphosphooligosaccharide--protein glycosyltransferase 48 kDa subunit	Dolichyl-diphosphooligosaccharide--protein glycosyltransferase 48 kDa subunit OS=Homo sapiens GN=DDOST PE=1 SV=4 - [OST48_HUMAN]	456	50.8	1.03	0.955	1.072	1.142	0.978	13	13	28	28	9.7	28	6.6	28	11.6	27	7.5	28	8.7
Q96HY6	DDRGK1	DDRGK domain-containing protein 1	DDRGK domain-containing protein 1 OS=Homo sapiens GN=DDRGK1 PE=1 SV=2 - [DDRGK_HUMAN]	314	35.6	0.972	1.061	1.11	1.196	1.087	5	6	13	12	12.7	12	12.6	12	7.3	12	16	12	10.6
P30046	DDT	D-dopachrome decarboxylase	D-dopachrome decarboxylase OS=Homo sapiens GN=DDT PE=1 SV=3 - [DOPD_HUMAN]	118	12.7	1.078	0.854	0.884	0.909	0.895	3	3	8	8	6.6	8	5.5	8	3.3	8	3.5	8	9.3
Q92499	DDX1	ATP-dependent RNA helicase DDX1	ATP-dependent RNA helicase DDX1 OS=Homo sapiens GN=DDX1 PE=1 SV=2 - [DDX1_HUMAN]	740	82.4	1	0.953	0.974	0.982	0.926	29	29	66	65	7.9	65	10.7	65	13.1	65	7.8	65	9.6
Q13206	DDX10	Probable ATP-dependent RNA helicase DDX10	Probable ATP-dependent RNA helicase DDX10 OS=Homo sapiens GN=DDX10 PE=1 SV=2 - [DDX10_HUMAN]	875	100.8	0.97	0.99	0.756	0.59	0.851	19	19	21	21	7.4	21	6.4	21	14.6	20	20	21	11.7
F6WZM0	DDX11		Probable ATP-dependent RNA helicase DDX11 OS=Homo sapiens GN=DDX11 PE=2 SV=1 - [F6WZM0_HUMAN]	288	33	0.986	1.024	0.922	0.998	1.142	1	4	4	1	NaN	1	NaN	1	NaN	1	NaN	1	NaN
A8MPP1	DDX11L8	Putative ATP-dependent RNA helicase DDX11-like protein 8	Putative ATP-dependent RNA helicase DDX11-like protein 8 OS=Homo sapiens GN=DDX11L8 PE=3 SV=1 - [D11L8_HUMAN]	907	101.7	0.984	0.894	1.025	0.775	0.876	1	4	4	1	NaN	1	NaN	1	NaN	1	NaN	1	NaN
Q92841	DDX17	Probable ATP-dependent RNA helicase DDX17	Probable ATP-dependent RNA helicase DDX17 OS=Homo sapiens GN=DDX17 PE=1 SV=2 - [DDX17_HUMAN]	729	80.2	1.01	0.837	0.774	0.789	0.833	23	30	100	74	6.7	74	8.6	74	9.6	73	8.4	74	9.5
Q9NVP1	DDX18	ATP-dependent RNA helicase DDX18	ATP-dependent RNA helicase DDX18 OS=Homo sapiens GN=DDX18 PE=1 SV=2 - [DDX18_HUMAN]	670	75.4	0.987	1.005	0.858	0.68	0.787	28	28	84	79	7.2	79	8.4	78	11.3	78	9	79	11.7
Q9NUU7	DDX19A	ATP-dependent RNA helicase DDX19A	ATP-dependent RNA helicase DDX19A OS=Homo sapiens GN=DDX19A PE=1 SV=1 - [DD19A_HUMAN]	478	53.9	1.034	1.039	0.955	0.988	1.006	7	20	37	10	6.1	10	6.4	10	9.8	10	8.7	10	12.4
Q9UMR2	DDX19B	ATP-dependent RNA helicase DDX19B	ATP-dependent RNA helicase DDX19B OS=Homo sapiens GN=DDX19B PE=1 SV=1 - [DD19B_HUMAN]	479	53.9	1.027	1.053	1.155	1.165	1.101	3	16	31	4	6.2	4	6.2	4	2.9	4	19.8	4	2.3
Q9UHI6	DDX20	Probable ATP-dependent RNA helicase DDX20	Probable ATP-dependent RNA helicase DDX20 OS=Homo sapiens GN=DDX20 PE=1 SV=2 - [DDX20_HUMAN]	824	92.2	0.939	0.785	0.616	0.509	0.682	10	10	13	13	8.3	13	9.8	13	16.9	13	13.9	13	5.6
Q9NR30	DDX21	Nucleolar RNA helicase 2	Nucleolar RNA helicase 2 OS=Homo sapiens GN=DDX21 PE=1 SV=5 - [DDX21_HUMAN]	783	87.3	0.954	1.016	0.663	0.491	0.713	31	34	84	77	5.7	77	10.5	77	12.4	77	15.6	77	11.9
Q9BUQ8	DDX23	Probable ATP-dependent RNA helicase DDX23	Probable ATP-dependent RNA helicase DDX23 OS=Homo sapiens GN=DDX23 PE=1 SV=3 - [DDX23_HUMAN]	820	95.5	0.982	1.021	1.077	1.06	1.048	23	23	43	43	7	43	7.5	43	7.8	43	8.9	43	8.9
G3V529	DDX24		ATP-dependent RNA helicase DDX24 OS=Homo sapiens GN=DDX24 PE=2 SV=1 - [G3V529_HUMAN]	816	91.4	0.83	0.924	0.809	0.75	0.905	21	21	36	36	7.2	36	8.4	36	10.7	36	15.2	36	10.3
Q96GQ7	DDX27	Probable ATP-dependent RNA helicase DDX27	Probable ATP-dependent RNA helicase DDX27 OS=Homo sapiens GN=DDX27 PE=1 SV=2 - [DDX27_HUMAN]	796	89.8	0.903	0.887	0.815	0.719	0.779	22	22	31	30	10.8	30	9.5	30	12.2	30	11.4	30	12.9
Q9NUL7	DDX28	Probable ATP-dependent RNA helicase DDX28	Probable ATP-dependent RNA helicase DDX28 OS=Homo sapiens GN=DDX28 PE=1 SV=2 - [DDX28_HUMAN]	540	59.5	1.031	1.04	0.834	0.75	0.902	7	7	8	8	7.4	8	7.8	8	6.6	8	7.6	8	3
F8WAJ0	DDX31		Probable ATP-dependent RNA helicase DDX31 OS=Homo sapiens GN=DDX31 PE=2 SV=1 - [F8WAJ0_HUMAN]	722	80.9	0.81	0.596	0.51	0.488	0.698	11	11	13	13	3	13	15.7	13	21.3	13	15.7	13	7.1
O00148	DDX39A	ATP-dependent RNA helicase DDX39A	ATP-dependent RNA helicase DDX39A OS=Homo sapiens GN=DDX39A PE=1 SV=2 - [DX39A_HUMAN]	427	49.1	0.989	1.003	0.921	0.752	0.829	4	14	51	23	4.3	23	9.9	23	17.8	23	18.3	23	9.8
Q13838	DDX39B	Spliceosome RNA helicase DDX39B	Spliceosome RNA helicase DDX39B OS=Homo sapiens GN=DDX39B PE=1 SV=1 - [DX39B_HUMAN]	428	49	1	0.987	1.096	1.085	0.998	6	15	57	27	6.4	27	9.4	27	11	27	13.2	27	10.6
O00571	DDX3X	ATP-dependent RNA helicase DDX3X	ATP-dependent RNA helicase DDX3X OS=Homo sapiens GN=DDX3X PE=1 SV=3 - [DDX3X_HUMAN]	662	73.2	0.988	0.934	0.7	0.663	0.928	31	32	65	60	6.2	60	8.5	60	14.6	60	13.1	60	8.1
Q9UJV9	DDX41	Probable ATP-dependent RNA helicase DDX41	Probable ATP-dependent RNA helicase DDX41 OS=Homo sapiens GN=DDX41 PE=1 SV=2 - [DDX41_HUMAN]	622	69.8	0.981	1.026	1.034	0.947	0.951	13	13	17	17	9.6	17	6.8	17	6.7	17	8.6	17	7.3
Q86XP3	DDX42	ATP-dependent RNA helicase DDX42	ATP-dependent RNA helicase DDX42 OS=Homo sapiens GN=DDX42 PE=1 SV=1 - [DDX42_HUMAN]	938	102.9	1.004	0.953	0.887	0.903	0.932	29	29	53	53	9.6	53	11	53	13.8	53	9.4	53	12
Q7L014	DDX46	Probable ATP-dependent RNA helicase DDX46	Probable ATP-dependent RNA helicase DDX46 OS=Homo sapiens GN=DDX46 PE=1 SV=2 - [DDX46_HUMAN]	1031	117.3	1.011	0.999	0.895	0.79	0.976	39	39	66	65	6.3	65	9.4	65	13.4	65	9.7	65	11.6
Q9H0S4	DDX47	Probable ATP-dependent RNA helicase DDX47	Probable ATP-dependent RNA helicase DDX47 OS=Homo sapiens GN=DDX47 PE=1 SV=1 - [DDX47_HUMAN]	455	50.6	0.971	0.94	0.694	0.514	0.733	11	11	20	20	6.8	20	5.9	20	13.7	20	9	20	11.2
Q9Y6V7	DDX49	Probable ATP-dependent RNA helicase DDX49	Probable ATP-dependent RNA helicase DDX49 OS=Homo sapiens GN=DDX49 PE=1 SV=1 - [DDX49_HUMAN]	483	54.2	0.972	0.987	0.719	0.639	0.892	6	6	9	9	13.9	9	7.7	9	20.5	9	41.6	9	19.1
J3KTA4	DDX5		Probable ATP-dependent RNA helicase DDX5 OS=Homo sapiens GN=DDX5 PE=4 SV=1 - [J3KTA4_HUMAN]	614	69	1.021	0.927	0.711	0.725	0.923	22	29	84	55	5.8	55	5.1	55	7.7	55	12.4	55	7.4
Q9BQ39	DDX50	ATP-dependent RNA helicase DDX50	ATP-dependent RNA helicase DDX50 OS=Homo sapiens GN=DDX50 PE=1 SV=1 - [DDX50_HUMAN]	737	82.5	0.964	0.936	0.797	0.654	0.845	19	22	32	25	10	25	14.4	25	14.6	25	10.3	25	14.8
Q8N8A6	DDX51	ATP-dependent RNA helicase DDX51	ATP-dependent RNA helicase DDX51 OS=Homo sapiens GN=DDX51 PE=1 SV=3 - [DDX51_HUMAN]	666	72.4	0.985	0.844	0.75	0.609	0.777	14	14	15	15	10.2	15	9.1	15	20.3	15	11	15	17.7
Q9Y2R4	DDX52	Probable ATP-dependent RNA helicase DDX52	Probable ATP-dependent RNA helicase DDX52 OS=Homo sapiens GN=DDX52 PE=1 SV=3 - [DDX52_HUMAN]	599	67.5	0.837	0.896	0.707	0.572	0.781	11	12	16	14	12.9	14	11.7	14	23.8	14	25.6	14	12.2
Q8TDD1	DDX54	ATP-dependent RNA helicase DDX54	ATP-dependent RNA helicase DDX54 OS=Homo sapiens GN=DDX54 PE=1 SV=2 - [DDX54_HUMAN]	881	98.5	0.837	0.792	0.598	0.529	0.745	12	13	17	14	13.8	14	12.2	14	14	14	13.9	14	9.8
F5H5U2	DDX55		ATP-dependent RNA helicase DDX55 OS=Homo sapiens GN=DDX55 PE=2 SV=1 - [F5H5U2_HUMAN]	569	65.1	0.911	1.021	0.785	0.667	0.805	9	9	12	12	4.9	12	15.3	12	17.4	12	11.3	12	9.5
Q9NY93	DDX56	Probable ATP-dependent RNA helicase DDX56	Probable ATP-dependent RNA helicase DDX56 OS=Homo sapiens GN=DDX56 PE=1 SV=1 - [DDX56_HUMAN]	547	61.6	0.843	0.821	0.662	0.621	0.788	10	10	11	11	10.4	11	16.4	11	15.2	11	30	11	14
O95786	DDX58	Probable ATP-dependent RNA helicase DDX58	Probable ATP-dependent RNA helicase DDX58 OS=Homo sapiens GN=DDX58 PE=1 SV=2 - [DDX58_HUMAN]	925	106.5	0.97	1.184	1.291	1.475	1.423	16	16	18	17	7.3	17	7.1	17	11.6	17	8.4	17	11.8
Q5T1V6	DDX59	Probable ATP-dependent RNA helicase DDX59	Probable ATP-dependent RNA helicase DDX59 OS=Homo sapiens GN=DDX59 PE=1 SV=1 - [DDX59_HUMAN]	619	68.8	0.947	0.922	0.875	0.846	0.922	2	4	8	2	11	2	4.4	2	26.1	2	40.4	2	5
P26196	DDX6	Probable ATP-dependent RNA helicase DDX6	Probable ATP-dependent RNA helicase DDX6 OS=Homo sapiens GN=DDX6 PE=1 SV=2 - [DDX6_HUMAN]	483	54.4	1.05	1.01	1.087	1.134	1.015	15	16	38	32	7.9	32	9.6	32	10	32	6.5	32	12.1
Q8IY21	DDX60	Probable ATP-dependent RNA helicase DDX60	Probable ATP-dependent RNA helicase DDX60 OS=Homo sapiens GN=DDX60 PE=1 SV=3 - [DDX60_HUMAN]	1712	197.7	1.021	0.989	1.014	1.187	0.888	19	19	21	21	6.2	21	11.3	21	8.7	21	11.8	21	7.6
B7Z6B8	DECR1		2,4-dienoyl-CoA reductase, mitochondrial OS=Homo sapiens GN=DECR1 PE=2 SV=1 - [B7Z6B8_HUMAN]	326	35	1.037	1.023	1.336	1.479	1.204	13	13	43	41	7.4	41	8.1	41	10.4	41	10.7	41	9.1
Q4VXZ8	DECR2		Peroxisomal 2,4-dienoyl-CoA reductase OS=Homo sapiens GN=DECR2 PE=2 SV=1 - [Q4VXZ8_HUMAN]	280	29.5	1.013	0.983	1.05	1.307	1.361	1	1	1	1	NaN	1	NaN	1	NaN	1	NaN	1	NaN
Q9H4E7	DEF6	Differentially expressed in FDCP 6 homolog	Differentially expressed in FDCP 6 homolog OS=Homo sapiens GN=DEF6 PE=1 SV=1 - [DEFI6_HUMAN]	631	73.9	0.996	1.039	1.091	1.077	1.085	24	25	33	31	6.6	31	7.6	31	10	31	11.7	31	15.5
O15121	DEGS1	Sphingolipid delta(4)-desaturase DES1	Sphingolipid delta(4)-desaturase DES1 OS=Homo sapiens GN=DEGS1 PE=1 SV=1 - [DEGS1_HUMAN]	323	37.8	1.007	0.967	1.132	1.166	0.861	3	3	4	4	11.7	4	7.8	4	9.9	4	7.1	4	9.8
P35659	DEK	Protein DEK	Protein DEK OS=Homo sapiens GN=DEK PE=1 SV=1 - [DEK_HUMAN]	375	42.6	1.035	0.888	0.85	0.863	0.824	8	8	21	20	6.9	20	5.6	20	9.3	20	7.6	20	11.8
Q8TEH3	DENND1A	DENN domain-containing protein 1A	DENN domain-containing protein 1A OS=Homo sapiens GN=DENND1A PE=1 SV=2 - [DEN1A_HUMAN]	1009	110.5	1.071	0.854	0.877	0.871	0.884	1	1	1	1	NaN	1	NaN	1	NaN	1	NaN	1	NaN
B3KR95	DENND1B		DENN domain-containing protein 1B OS=Homo sapiens GN=DENND1B PE=2 SV=1 - [B3KR95_HUMAN]	352	39.8	1.423	1.499	1.865	1.704	1.814	1	1	1	1	NaN	1	NaN	1	NaN	1	NaN	1	NaN
Q8IV53	DENND1C	DENN domain-containing protein 1C	DENN domain-containing protein 1C OS=Homo sapiens GN=DENND1C PE=1 SV=1 - [DEN1C_HUMAN]	801	87	0.884	0.878	1.199	1.44	1.13	2	2	2	2	2.3	2	16.3	2	7.2	2	8.6	2	10.5
A2RUS2	DENND3	DENN domain-containing protein 3	DENN domain-containing protein 3 OS=Homo sapiens GN=DENND3 PE=1 SV=2 - [DEND3_HUMAN]	1198	135.8	0.826	0.998	0.995	0.95	0.883	2	2	2	2	27.8	2	5.4	2	9.9	2	6.5	2	42.5
R4GNB2	DENND4C		DENN domain-containing protein 4C OS=Homo sapiens GN=DENND4C PE=4 SV=1 - [R4GNB2_HUMAN]	1909	212.6	0.917	1.065	1.118	1.175	1.221	9	9	11	11	13.2	11	12.9	11	13.9	11	14.8	11	12
O43583	DENR	Density-regulated protein	Density-regulated protein OS=Homo sapiens GN=DENR PE=1 SV=2 - [DENR_HUMAN]	198	22.1	0.994	1.077	1.076	1.099	1.098	5	5	19	19	9.5	19	7.4	19	11.2	19	13.6	19	9.6
Q8WUY9	DEPDC1B	DEP domain-containing protein 1B	DEP domain-containing protein 1B OS=Homo sapiens GN=DEPDC1B PE=1 SV=2 - [DEP1B_HUMAN]	529	61.7	0.871	1.718	1.733	1.342	0.937	3	3	3	3	2.7	3	39.5	3	29.1	3	1.3	3	5.7
Q9Y315	DERA	Putative deoxyribose-phosphate aldolase	Putative deoxyribose-phosphate aldolase OS=Homo sapiens GN=DERA PE=1 SV=2 - [DEOC_HUMAN]	318	35.2	1.027	1.128	1.239	1.411	1.195	10	10	17	17	12.3	17	17.2	17	9.1	17	14.5	17	10.3
B4E1G1	DERL1		Derlin-1 OS=Homo sapiens GN=DERL1 PE=2 SV=1 - [B4E1G1_HUMAN]	151	17	1.08	1.105	1.003	1.028	1.357	2	2	2	2	20.4	2	30.2	2	7.7	2	10.9	2	55.3
I3L1T3	DERL2		Derlin-2 (Fragment) OS=Homo sapiens GN=DERL2 PE=2 SV=1 - [I3L1T3_HUMAN]	158	18	0.93	1.256	1.28	1.541	1.113	1	1	2	2	15.8	2	3	2	3.5	2	1.8	2	4.7
Q6ICB0	DESI1	Desumoylating isopeptidase 1	Desumoylating isopeptidase 1 OS=Homo sapiens GN=DESI1 PE=1 SV=1 - [DESI1_HUMAN]	168	18.3	0.879	1.15	1.236	1.563	1.318	2	2	2	2	0.3	2	4.3	2	8.4	2	0.6	2	17.1
Q9BSY9	DESI2	Desumoylating isopeptidase 2	Desumoylating isopeptidase 2 OS=Homo sapiens GN=DESI2 PE=1 SV=1 - [DESI2_HUMAN]	194	21.4	0.891	1.217	1.251	1.239	1.179	2	2	3	3	1.1	3	2.6	3	6.4	3	3.2	3	3.6
O00273	DFFA	DNA fragmentation factor subunit alpha	DNA fragmentation factor subunit alpha OS=Homo sapiens GN=DFFA PE=1 SV=1 - [DFFA_HUMAN]	331	36.5	1.028	0.987	0.928	0.921	0.996	7	7	17	16	5.7	16	6	16	8.1	16	8.4	16	14.9
O76075	DFFB	DNA fragmentation factor subunit beta	DNA fragmentation factor subunit beta OS=Homo sapiens GN=DFFB PE=1 SV=1 - [DFFB_HUMAN]	338	39.1	0.913	1.001	0.787	1.038	1.059	2	2	2	2	13.5	2	7.1	2	48.8	2	13.3	2	9.5
O75907	DGAT1	Diacylglycerol O-acyltransferase 1	Diacylglycerol O-acyltransferase 1 OS=Homo sapiens GN=DGAT1 PE=1 SV=2 - [DGAT1_HUMAN]	488	55.2	1.035	0.966	1.034	0.98	0.985	3	3	3	3	16.9	3	2.2	3	1.5	3	12.9	3	2.2
Q96DF8	DGCR14	Protein DGCR14	Protein DGCR14 OS=Homo sapiens GN=DGCR14 PE=1 SV=1 - [DGC14_HUMAN]	476	52.5	0.947	0.854	0.787	0.789	0.894	8	8	10	10	14.2	10	14.5	10	18.5	10	16.8	10	8.8
Q8WYQ5	DGCR8	Microprocessor complex subunit DGCR8	Microprocessor complex subunit DGCR8 OS=Homo sapiens GN=DGCR8 PE=1 SV=1 - [DGCR8_HUMAN]	773	86	0.939	1.176	1.156	1.095	1.025	4	4	4	4	13.7	4	19.7	4	24.9	4	17.3	4	9.4
P23743	DGKA	Diacylglycerol kinase alpha	Diacylglycerol kinase alpha OS=Homo sapiens GN=DGKA PE=1 SV=3 - [DGKA_HUMAN]	735	82.6	0.996	1.121	1.309	1.498	1.683	13	13	14	14	8.8	14	4.5	14	8.8	14	6.2	14	11
I3L112	DGKE		Diacylglycerol kinase epsilon (Fragment) OS=Homo sapiens GN=DGKE PE=4 SV=1 - [I3L112_HUMAN]	456	51.2	0.909	0.979	1.067	1.152	1.037	4	4	7	7	9	7	6.3	7	19.6	7	4.2	7	2.2
Q86XP1	DGKH	Diacylglycerol kinase eta	Diacylglycerol kinase eta OS=Homo sapiens GN=DGKH PE=1 SV=1 - [DGKH_HUMAN]	1220	134.8	0.925	1.033	1.017	1.063	1.163	3	3	3	3	2.4	3	1.2	3	3.2	3	3.6	3	2.3
E9PNL8	DGKZ		Diacylglycerol kinase zeta OS=Homo sapiens GN=DGKZ PE=2 SV=1 - [E9PNL8_HUMAN]	707	78.9	1.019	1.052	1.24	1.305	1.265	5	5	5	5	6.8	5	6.8	5	9.8	5	23.2	5	23.7
Q16854	DGUOK	Deoxyguanosine kinase, mitochondrial	Deoxyguanosine kinase, mitochondrial OS=Homo sapiens GN=DGUOK PE=1 SV=2 - [DGUOK_HUMAN]	277	32	1.027	1.071	1.069	1.201	1.231	3	3	4	4	13.8	4	5.9	4	2.9	4	5.1	4	2.3
B7Z817	DHCR24		Delta(24)-sterol reductase OS=Homo sapiens GN=DHCR24 PE=2 SV=1 - [B7Z817_HUMAN]	475	54.7	1.008	1.142	1.639	1.967	1.048	6	6	12	12	7.7	12	14.8	12	8.4	11	4.7	12	13.4
Q9UBM7	DHCR7	7-dehydrocholesterol reductase	7-dehydrocholesterol reductase OS=Homo sapiens GN=DHCR7 PE=1 SV=1 - [DHCR7_HUMAN]	475	54.5	1.013	0.948	1.125	1.232	0.808	5	5	9	9	6.7	9	5.4	9	16.3	9	7.8	9	5.4
P00374	DHFR	Dihydrofolate reductase	Dihydrofolate reductase OS=Homo sapiens GN=DHFR PE=1 SV=2 - [DYR_HUMAN]	187	21.4	1.093	1.111	1.426	1.457	1.267	10	10	22	22	6.9	22	10	22	14.7	22	12.7	22	12.6
Q02127	DHODH	Dihydroorotate dehydrogenase (quinone), mitochondrial	Dihydroorotate dehydrogenase (quinone), mitochondrial OS=Homo sapiens GN=DHODH PE=1 SV=3 - [PYRD_HUMAN]	395	42.8	1.001	0.986	0.956	0.915	0.819	6	6	6	6	6.2	6	11.4	6	7.3	6	16.5	6	7.8
P49366	DHPS	Deoxyhypusine synthase	Deoxyhypusine synthase OS=Homo sapiens GN=DHPS PE=1 SV=1 - [DHYS_HUMAN]	369	40.9	0.956	0.928	0.817	0.621	0.78	10	10	23	23	10.7	23	6.6	23	6.3	23	7.7	23	8.2
Q96LJ7	DHRS1	Dehydrogenase/reductase SDR family member 1	Dehydrogenase/reductase SDR family member 1 OS=Homo sapiens GN=DHRS1 PE=1 SV=1 - [DHRS1_HUMAN]	313	33.9	1.155	2.15	3.035	3.148	1.949	1	1	2	2	12.3	2	10	2	11.7	2	8.4	2	3.5
K7EJP4	DHRS11		Dehydrogenase/reductase SDR family member 11 OS=Homo sapiens GN=DHRS11 PE=4 SV=1 - [K7EJP4_HUMAN]	50	5.2	1.093	1.02	1.008	1.051	1.003	1	1	1	1	NaN	1	NaN	1	NaN	1	NaN	1	NaN
Q13268	DHRS2	Dehydrogenase/reductase SDR family member 2	Dehydrogenase/reductase SDR family member 2, mitochondrial OS=Homo sapiens GN=DHRS2 PE=1 SV=4 - [DHRS2_HUMAN]	280	29.9	1.022	0.904	1.161	1.469	1.039	10	10	93	80	7.6	80	13.1	80	20.5	80	25.5	80	9.6
Q9BTZ2	DHRS4	Dehydrogenase/reductase SDR family member 4	Dehydrogenase/reductase SDR family member 4 OS=Homo sapiens GN=DHRS4 PE=1 SV=3 - [DHRS4_HUMAN]	278	29.5	1.048	0.888	0.971	1.083	0.894	5	5	5	5	3.7	5	9.7	5	4	5	6.8	5	8.3
Q9Y394	DHRS7	Dehydrogenase/reductase SDR family member 7	Dehydrogenase/reductase SDR family member 7 OS=Homo sapiens GN=DHRS7 PE=1 SV=1 - [DHRS7_HUMAN]	339	38.3	0.979	1.039	1.355	1.619	1.198	9	9	22	20	9.3	20	8.1	20	17.4	20	15.6	20	6.8
Q6IAN0	DHRS7B	Dehydrogenase/reductase SDR family member 7B	Dehydrogenase/reductase SDR family member 7B OS=Homo sapiens GN=DHRS7B PE=1 SV=2 - [DRS7B_HUMAN]	325	35.1	1.207	1.236	1.891	2.184	1.531	1	1	1	1	NaN	1	NaN	1	NaN	1	NaN	1	NaN
Q96HY7	DHTKD1	Probable 2-oxoglutarate dehydrogenase E1 component DHKTD1, mitochondrial	Probable 2-oxoglutarate dehydrogenase E1 component DHKTD1, mitochondrial OS=Homo sapiens GN=DHTKD1 PE=1 SV=2 - [DHTK1_HUMAN]	919	103	0.983	0.971	1.114	1.116	1.064	4	5	5	4	6.5	4	6.7	4	4.4	4	3.4	4	4.1
O43143	DHX15	Putative pre-mRNA-splicing factor ATP-dependent RNA helicase DHX15	Putative pre-mRNA-splicing factor ATP-dependent RNA helicase DHX15 OS=Homo sapiens GN=DHX15 PE=1 SV=2 - [DHX15_HUMAN]	795	90.9	1.025	0.931	0.836	0.792	0.804	27	28	78	77	7.9	76	6.7	76	10.2	77	9.9	76	9.1
O60231	DHX16	Putative pre-mRNA-splicing factor ATP-dependent RNA helicase DHX16	Putative pre-mRNA-splicing factor ATP-dependent RNA helicase DHX16 OS=Homo sapiens GN=DHX16 PE=1 SV=2 - [DHX16_HUMAN]	1041	119.2	0.996	1.069	1.024	0.979	0.936	21	22	34	33	8.2	33	6.8	33	11.1	33	11	33	10.2
Q7Z478	DHX29	ATP-dependent RNA helicase DHX29	ATP-dependent RNA helicase DHX29 OS=Homo sapiens GN=DHX29 PE=1 SV=2 - [DHX29_HUMAN]	1369	155.1	1.019	1.078	1.081	1.052	1.093	21	21	24	24	9.1	24	9.4	24	13.6	24	10.8	24	8.7
H7BXY3	DHX30		Putative ATP-dependent RNA helicase DHX30 OS=Homo sapiens GN=DHX30 PE=2 SV=1 - [H7BXY3_HUMAN]	1166	130.5	0.963	1.051	0.928	0.86	1.014	41	41	60	60	8.9	60	7.5	60	8.9	60	10.1	60	8.2
Q14147	DHX34	Probable ATP-dependent RNA helicase DHX34	Probable ATP-dependent RNA helicase DHX34 OS=Homo sapiens GN=DHX34 PE=1 SV=2 - [DHX34_HUMAN]	1143	128	0.772	1.015	0.835	0.937	1.134	1	1	2	2	4.7	2	9.9	2	3.8	2	14.5	2	1
Q5THR1	DHX35		Probable ATP-dependent RNA helicase DHX35 OS=Homo sapiens GN=DHX35 PE=2 SV=1 - [Q5THR1_HUMAN]	679	76	0.943	1	0.833	0.896	0.952	3	3	3	3	2.6	3	7.3	3	6.6	3	5.6	3	0.7
F5GZS0	DHX36		Probable ATP-dependent RNA helicase DHX36 OS=Homo sapiens GN=DHX36 PE=2 SV=1 - [F5GZS0_HUMAN]	994	113	0.941	1.015	0.81	0.747	1.003	19	20	28	27	7.1	27	11.2	27	10.6	27	16.3	27	9.9
Q8IY37	DHX37	Probable ATP-dependent RNA helicase DHX37	Probable ATP-dependent RNA helicase DHX37 OS=Homo sapiens GN=DHX37 PE=1 SV=1 - [DHX37_HUMAN]	1157	129.5	0.943	1.058	0.792	0.615	0.869	15	15	17	17	9.9	17	4.6	17	11.7	17	12	17	11.1
Q92620	DHX38	Pre-mRNA-splicing factor ATP-dependent RNA helicase PRP16	Pre-mRNA-splicing factor ATP-dependent RNA helicase PRP16 OS=Homo sapiens GN=DHX38 PE=1 SV=2 - [PRP16_HUMAN]	1227	140.4	0.974	1.03	0.936	0.931	0.955	10	10	16	16	9.5	16	6.3	16	10.3	16	5.3	16	5.4
Q8IX18	DHX40	Probable ATP-dependent RNA helicase DHX40	Probable ATP-dependent RNA helicase DHX40 OS=Homo sapiens GN=DHX40 PE=1 SV=2 - [DHX40_HUMAN]	779	88.5	1.136	1.111	1.003	0.918	1.149	4	4	4	4	6.6	4	9.6	4	18.2	4	17	4	17.9
Q6P158	DHX57	Putative ATP-dependent RNA helicase DHX57	Putative ATP-dependent RNA helicase DHX57 OS=Homo sapiens GN=DHX57 PE=1 SV=2 - [DHX57_HUMAN]	1386	155.5	0.952	0.944	1.074	1.103	1.018	12	13	13	11	13.2	11	4.8	11	8.9	11	10.3	11	5.2
Q14562	DHX8	ATP-dependent RNA helicase DHX8	ATP-dependent RNA helicase DHX8 OS=Homo sapiens GN=DHX8 PE=1 SV=1 - [DHX8_HUMAN]	1220	139.2	1.087	1.056	0.867	0.852	0.983	23	24	27	26	6.3	26	10.5	26	8.3	26	12.4	26	7.1
Q08211	DHX9	ATP-dependent RNA helicase A	ATP-dependent RNA helicase A OS=Homo sapiens GN=DHX9 PE=1 SV=4 - [DHX9_HUMAN]	1270	140.9	1.035	1.04	1.016	0.97	1.003	35	35	151	146	6.5	146	9.4	146	9.8	145	10.2	146	9.7
Q9NR28	DIABLO	Diablo homolog, mitochondrial	Diablo homolog, mitochondrial OS=Homo sapiens GN=DIABLO PE=1 SV=1 - [DBLOH_HUMAN]	239	27.1	1.051	1.008	1.035	1.063	1.051	7	7	12	12	7.2	12	15.2	12	13.4	12	20.1	12	13.6
E9PEZ3	DIAPH1		Protein diaphanous homolog 1 OS=Homo sapiens GN=DIAPH1 PE=2 SV=1 - [E9PEZ3_HUMAN]	1269	141	0.971	1.187	1.543	1.733	1.654	40	41	98	97	6.7	97	11.3	97	15.2	96	14.2	97	10.4
A6NML8	DIAPH2		Diaphanous homolog 2 (Drosophila), isoform CRA_c OS=Homo sapiens GN=DIAPH2 PE=2 SV=3 - [A6NML8_HUMAN]	1096	124.8	1.028	1.037	1.055	0.976	1.051	20	21	23	22	8.6	22	6	22	13.8	22	7	22	9
C9JDG0	DIAPH3		Protein diaphanous homolog 3 OS=Homo sapiens GN=DIAPH3 PE=2 SV=1 - [C9JDG0_HUMAN]	1193	136.8	1.007	1.179	1.325	1.204	1.261	4	6	8	5	18.1	5	4.5	5	11.9	5	7.5	5	8.3
Q9UPY3	DICER1	Endoribonuclease Dicer	Endoribonuclease Dicer OS=Homo sapiens GN=DICER1 PE=1 SV=3 - [DICER_HUMAN]	1922	218.5	0.979	0.988	0.986	0.945	1.133	26	28	33	29	9.6	29	10.4	29	14.7	29	16	29	10.9
Q9BTC0	DIDO1	Death-inducer obliterator 1	Death-inducer obliterator 1 OS=Homo sapiens GN=DIDO1 PE=1 SV=5 - [DIDO1_HUMAN]	2240	243.7	1.005	0.95	0.845	0.837	0.943	34	35	44	42	5.8	42	8.3	42	9.9	42	8.6	42	9.6
Q68CQ4	DIEXF	Digestive organ expansion factor homolog	Digestive organ expansion factor homolog OS=Homo sapiens GN=DIEXF PE=1 SV=2 - [DIEXF_HUMAN]	756	87	0.938	0.906	0.492	0.424	0.813	6	6	7	7	5.7	7	2.9	7	16.9	7	31	7	11.4
Q9UNQ2	DIMT1	Probable dimethyladenosine transferase	Probable dimethyladenosine transferase OS=Homo sapiens GN=DIMT1 PE=1 SV=1 - [DIM1_HUMAN]	313	35.2	0.844	0.768	0.589	0.514	0.821	6	6	10	10	4.5	10	7.9	10	8.8	10	4.5	10	7.5
Q14689	DIP2A	Disco-interacting protein 2 homolog A	Disco-interacting protein 2 homolog A OS=Homo sapiens GN=DIP2A PE=1 SV=2 - [DIP2A_HUMAN]	1571	170.3	1.268	1.267	1.492	1.299	1.502	1	1	1	1	NaN	1	NaN	1	NaN	1	NaN	1	NaN
Q9P265	DIP2B	Disco-interacting protein 2 homolog B	Disco-interacting protein 2 homolog B OS=Homo sapiens GN=DIP2B PE=1 SV=3 - [DIP2B_HUMAN]	1576	171.4	1.008	1.113	1.215	1.417	1.075	17	18	21	20	13.1	20	6.9	20	12	20	12.1	20	10.3
Q9Y2L1	DIS3	Exosome complex exonuclease RRP44	Exosome complex exonuclease RRP44 OS=Homo sapiens GN=DIS3 PE=1 SV=2 - [RRP44_HUMAN]	958	108.9	1.029	1.008	0.902	0.852	0.919	31	31	48	48	7.2	48	12.3	48	10.2	48	10.3	48	12.8
Q8TF46	DIS3L	DIS3-like exonuclease 1	DIS3-like exonuclease 1 OS=Homo sapiens GN=DIS3L PE=1 SV=2 - [DI3L1_HUMAN]	1054	120.7	0.884	0.826	0.743	0.734	0.781	3	3	3	3	11.2	3	22.6	3	7.3	3	0.1	3	5.3
Q8IYB7	DIS3L2	DIS3-like exonuclease 2	DIS3-like exonuclease 2 OS=Homo sapiens GN=DIS3L2 PE=1 SV=4 - [DI3L2_HUMAN]	885	99.2	1.011	0.961	1.068	1.112	1.047	10	10	11	11	11.6	11	4.6	11	12.1	11	7.4	11	11.9
O60832	DKC1	H/ACA ribonucleoprotein complex subunit 4	H/ACA ribonucleoprotein complex subunit 4 OS=Homo sapiens GN=DKC1 PE=1 SV=3 - [DKC1_HUMAN]	514	57.6	1.002	0.902	0.768	0.716	0.846	15	15	29	29	3.5	29	7.8	29	9.4	29	7.9	29	11
Q9UFM8	DKFZp566H1924		Neuroplastin (Fragment) OS=Homo sapiens GN=DKFZp566H1924 PE=2 SV=2 - [Q9UFM8_HUMAN]	308	34.8	0.902	1.032	1.146	1.28	1.242	4	4	4	4	5.7	4	7.4	4	5.2	4	7.9	4	4.5
Q68DL0	DKFZp779K1237		Phosphatidylinositol 4,5-bisphosphate 3-kinase catalytic subunit beta isoform OS=Homo sapiens GN=DKFZp779K1237 PE=2 SV=1 - [Q68DL0_HUMAN]	521	59.7	0.939	0.988	0.906	1.142	0.943	3	4	5	4	9.4	4	5.1	4	11.5	4	0.7	4	1.6
P10515	DLAT	Dihydrolipoyllysine-residue acetyltransferase component of pyruvate dehydrogenase complex, mitochondrial	Dihydrolipoyllysine-residue acetyltransferase component of pyruvate dehydrogenase complex, mitochondrial OS=Homo sapiens GN=DLAT PE=1 SV=3 - [ODP2_HUMAN]	647	69	0.991	1.01	1.016	1.045	0.919	14	14	30	30	8.8	30	10.9	30	8.1	30	9.7	30	8.4
P09622	DLD	Dihydrolipoyl dehydrogenase, mitochondrial	Dihydrolipoyl dehydrogenase, mitochondrial OS=Homo sapiens GN=DLD PE=1 SV=2 - [DLDH_HUMAN]	509	54.1	1.042	0.983	1.009	1.057	0.853	15	15	44	44	7.2	44	11.9	44	9.8	44	8.5	44	12.2
Q12959	DLG1	Disks large homolog 1	Disks large homolog 1 OS=Homo sapiens GN=DLG1 PE=1 SV=2 - [DLG1_HUMAN]	904	100.4	0.966	0.954	0.868	0.831	1.215	5	5	5	5	10.4	5	7.6	5	2.4	5	16.1	5	1.2
Q9Y2H0	DLGAP4	Disks large-associated protein 4	Disks large-associated protein 4 OS=Homo sapiens GN=DLGAP4 PE=1 SV=3 - [DLGP4_HUMAN]	992	107.9	1.043	1.095	1.105	1.305	1.173	6	6	8	8	7.6	8	12.9	8	5.8	8	8.3	8	10.2
Q15398	DLGAP5	Disks large-associated protein 5	Disks large-associated protein 5 OS=Homo sapiens GN=DLGAP5 PE=1 SV=2 - [DLGP5_HUMAN]	846	95.1	1.101	1.372	1.995	1.769	1.122	23	23	33	33	10.9	33	17	33	25.2	33	36.3	33	14.8
P36957	DLST	Dihydrolipoyllysine-residue succinyltransferase component of 2-oxoglutarate dehydrogenase complex, mitochondrial	Dihydrolipoyllysine-residue succinyltransferase component of 2-oxoglutarate dehydrogenase complex, mitochondrial OS=Homo sapiens GN=DLST PE=1 SV=4 - [ODO2_HUMAN]	453	48.7	1.039	0.904	0.973	1.039	0.838	8	8	15	15	3.9	15	12.2	15	6.5	15	10.9	15	11.9
Q9NPF5	DMAP1	DNA methyltransferase 1-associated protein 1	DNA methyltransferase 1-associated protein 1 OS=Homo sapiens GN=DMAP1 PE=1 SV=1 - [DMAP1_HUMAN]	467	53	1.044	1.057	0.983	0.986	1.099	5	5	9	9	9.2	9	19	9	8.5	9	12.1	9	11.1
Q9Y485	DMXL1	DmX-like protein 1	DmX-like protein 1 OS=Homo sapiens GN=DMXL1 PE=1 SV=3 - [DMXL1_HUMAN]	3027	337.6	0.986	1.059	1.032	1.072	1.094	6	7	8	7	8.7	7	13	7	12	7	1.9	7	12.1
Q8TDJ6	DMXL2	DmX-like protein 2	DmX-like protein 2 OS=Homo sapiens GN=DMXL2 PE=1 SV=2 - [DMXL2_HUMAN]	3036	339.4	1.159	1.635	2.062	1.822	1.754	2	3	3	2	4.5	2	3	2	1.6	2	12.3	2	14.3
F8VR31	DNA2		DNA replication ATP-dependent helicase/nuclease DNA2 OS=Homo sapiens GN=DNA2 PE=2 SV=2 - [F8VR31_HUMAN]	801	90.8	0.501	0.937	0.76	0.345	0.643	1	2	3	2	117.2	2	13.3	2	19.1	2	40	2	70.4
Q9NVR5	DNAAF2	Protein kintoun	Protein kintoun OS=Homo sapiens GN=DNAAF2 PE=1 SV=2 - [KTU_HUMAN]	837	91.1	0.845	0.984	0.992	1.105	1.404	1	1	1	1	NaN	1	NaN	1	NaN	1	NaN	1	NaN
H0Y7V4	DNAH8		Dynein heavy chain 8, axonemal OS=Homo sapiens GN=DNAH8 PE=2 SV=1 - [H0Y7V4_HUMAN]	4188	478.6	1.11	1.246	1.3	1.757	1.516	1	1	1	1	NaN	1	NaN	1	NaN	1	NaN	1	NaN
P31689	DNAJA1	DnaJ homolog subfamily A member 1	DnaJ homolog subfamily A member 1 OS=Homo sapiens GN=DNAJA1 PE=1 SV=2 - [DNJA1_HUMAN]	397	44.8	0.849	1.069	0.765	0.733	0.914	16	16	76	73	12.4	73	10.2	73	22.5	73	18.2	73	13.9
O60884	DNAJA2	DnaJ homolog subfamily A member 2	DnaJ homolog subfamily A member 2 OS=Homo sapiens GN=DNAJA2 PE=1 SV=1 - [DNJA2_HUMAN]	412	45.7	0.993	1.016	1	0.988	0.939	11	11	19	19	3.3	19	10.6	19	20.2	19	11.7	19	13.5
Q96EY1	DNAJA3	DnaJ homolog subfamily A member 3, mitochondrial	DnaJ homolog subfamily A member 3, mitochondrial OS=Homo sapiens GN=DNAJA3 PE=1 SV=2 - [DNJA3_HUMAN]	480	52.5	0.964	0.961	0.848	0.781	0.85	9	9	14	14	10	14	11.9	14	11.3	14	9.6	14	5.2
P25685	DNAJB1	DnaJ homolog subfamily B member 1	DnaJ homolog subfamily B member 1 OS=Homo sapiens GN=DNAJB1 PE=1 SV=4 - [DNJB1_HUMAN]	340	38	0.985	0.899	0.854	0.795	0.774	11	12	31	26	9.5	26	8.3	26	11.1	26	10.2	26	15.1
Q9UBS4	DNAJB11	DnaJ homolog subfamily B member 11	DnaJ homolog subfamily B member 11 OS=Homo sapiens GN=DNAJB11 PE=1 SV=1 - [DJB11_HUMAN]	358	40.5	1.014	1.052	1.217	1.38	1.071	10	10	18	18	6.2	18	8	18	14.3	18	7.4	18	5.4
Q9NXW2	DNAJB12	DnaJ homolog subfamily B member 12	DnaJ homolog subfamily B member 12 OS=Homo sapiens GN=DNAJB12 PE=1 SV=4 - [DJB12_HUMAN]	375	41.8	0.962	1.138	1.115	1.163	0.984	2	2	2	2	4.1	2	8.2	2	0.2	2	9.6	2	0.3
Q8TBM8	DNAJB14	DnaJ homolog subfamily B member 14	DnaJ homolog subfamily B member 14 OS=Homo sapiens GN=DNAJB14 PE=2 SV=1 - [DJB14_HUMAN]	379	42.5	0.943	1.161	1.301	1.202	1.036	7	7	9	9	9.1	9	4.4	9	11.3	9	15.1	9	12.8
C9JRD2	DNAJB2		DnaJ homolog subfamily B member 2 (Fragment) OS=Homo sapiens GN=DNAJB2 PE=2 SV=1 - [C9JRD2_HUMAN]	228	25.4	0.802	1.16	0.769	0.908	0.802	1	2	2	1	NaN	1	NaN	1	NaN	1	NaN	1	NaN
Q9UDY4	DNAJB4	DnaJ homolog subfamily B member 4	DnaJ homolog subfamily B member 4 OS=Homo sapiens GN=DNAJB4 PE=1 SV=1 - [DNJB4_HUMAN]	337	37.8	1.003	1.199	1.314	1.542	0.86	3	4	8	5	10.2	5	12	5	7.6	5	7.5	5	7.5
O75953	DNAJB5	DnaJ homolog subfamily B member 5	DnaJ homolog subfamily B member 5 OS=Homo sapiens GN=DNAJB5 PE=1 SV=1 - [DNJB5_HUMAN]	348	39.1	0.901	1.151	1.142	1.368	0.956	1	1	1	1	NaN	1	NaN	1	NaN	1	NaN	1	NaN
O75190	DNAJB6	DnaJ homolog subfamily B member 6	DnaJ homolog subfamily B member 6 OS=Homo sapiens GN=DNAJB6 PE=1 SV=2 - [DNJB6_HUMAN]	326	36.1	0.649	0.621	0.534	0.559	0.655	5	6	11	10	20.5	10	18.6	10	25	10	12.8	10	34.9
Q96KC8	DNAJC1	DnaJ homolog subfamily C member 1	DnaJ homolog subfamily C member 1 OS=Homo sapiens GN=DNAJC1 PE=1 SV=1 - [DNJC1_HUMAN]	554	63.8	1.044	1.327	1.331	1.171	1.297	3	3	3	3	8.9	3	4	3	36.9	3	38.9	3	2.1
Q8IXB1	DNAJC10	DnaJ homolog subfamily C member 10	DnaJ homolog subfamily C member 10 OS=Homo sapiens GN=DNAJC10 PE=1 SV=2 - [DJC10_HUMAN]	793	91	0.968	0.963	1.003	1.042	0.995	6	6	9	9	3.4	9	8.8	9	10.3	9	6.9	9	14
Q9NVH1	DNAJC11	DnaJ homolog subfamily C member 11	DnaJ homolog subfamily C member 11 OS=Homo sapiens GN=DNAJC11 PE=1 SV=2 - [DJC11_HUMAN]	559	63.2	1.068	0.976	1.005	0.962	0.865	8	8	8	8	4.4	8	8.3	8	12.2	8	8.4	8	8
O75165	DNAJC13	DnaJ homolog subfamily C member 13	DnaJ homolog subfamily C member 13 OS=Homo sapiens GN=DNAJC13 PE=1 SV=5 - [DJC13_HUMAN]	2243	254.3	0.985	1.077	1.199	1.266	1.112	21	21	27	27	7.9	27	14.6	27	20.4	27	14	27	10.4
Q5TDG9	DNAJC16		DnaJ (Hsp40) homolog, subfamily C, member 16, isoform CRA_a OS=Homo sapiens GN=DNAJC16 PE=2 SV=1 - [Q5TDG9_HUMAN]	595	69.3	0.722	1.232	1.27	1.457	1.134	3	3	3	3	7.6	3	19.7	3	4.6	3	10.2	3	16.3
Q9NVM6	DNAJC17	DnaJ homolog subfamily C member 17	DnaJ homolog subfamily C member 17 OS=Homo sapiens GN=DNAJC17 PE=1 SV=1 - [DJC17_HUMAN]	304	34.7	1.058	0.982	0.851	0.898	0.96	3	3	4	4	3.2	4	6.4	4	9.8	4	14.4	4	7
Q96DA6	DNAJC19	Mitochondrial import inner membrane translocase subunit TIM14	Mitochondrial import inner membrane translocase subunit TIM14 OS=Homo sapiens GN=DNAJC19 PE=1 SV=3 - [TIM14_HUMAN]	116	12.5	1.044	1.034	1.109	1.14	0.996	6	6	9	9	6.9	9	7.2	9	7.2	9	3.3	9	1.6
Q99543	DNAJC2	DnaJ homolog subfamily C member 2	DnaJ homolog subfamily C member 2 OS=Homo sapiens GN=DNAJC2 PE=1 SV=4 - [DNJC2_HUMAN]	621	72	0.958	0.96	0.856	0.807	0.842	13	14	21	19	9.5	19	8.2	19	9.3	19	3.9	19	8.5
Q5F1R6	DNAJC21	DnaJ homolog subfamily C member 21	DnaJ homolog subfamily C member 21 OS=Homo sapiens GN=DNAJC21 PE=1 SV=2 - [DJC21_HUMAN]	531	62	0.921	1.165	1.119	1.07	1.236	8	8	10	10	15.4	10	11.7	10	8.6	10	6	10	15.5
Q13217	DNAJC3	DnaJ homolog subfamily C member 3	DnaJ homolog subfamily C member 3 OS=Homo sapiens GN=DNAJC3 PE=1 SV=1 - [DNJC3_HUMAN]	504	57.5	1.033	1.019	1.285	1.439	1.001	13	13	18	18	10.3	18	10	18	19.4	18	12.3	18	11.1
Q9H3Z4	DNAJC5	DnaJ homolog subfamily C member 5	DnaJ homolog subfamily C member 5 OS=Homo sapiens GN=DNAJC5 PE=1 SV=1 - [DNJC5_HUMAN]	198	22.1	1.05	0.988	1.208	1.337	1.144	7	7	7	7	6.8	7	10	7	14.7	7	9.4	7	10.6
Q99615	DNAJC7	DnaJ homolog subfamily C member 7	DnaJ homolog subfamily C member 7 OS=Homo sapiens GN=DNAJC7 PE=1 SV=2 - [DNJC7_HUMAN]	494	56.4	0.978	0.909	0.835	0.836	0.832	26	26	39	39	6.5	39	10.2	39	10.6	39	14.2	39	11.7
O75937	DNAJC8	DnaJ homolog subfamily C member 8	DnaJ homolog subfamily C member 8 OS=Homo sapiens GN=DNAJC8 PE=1 SV=2 - [DNJC8_HUMAN]	253	29.8	1	1.018	0.93	0.908	0.978	8	8	17	17	3.7	17	11.6	17	13.5	17	11.6	17	11.6
Q8WXX5	DNAJC9	DnaJ homolog subfamily C member 9	DnaJ homolog subfamily C member 9 OS=Homo sapiens GN=DNAJC9 PE=1 SV=1 - [DNJC9_HUMAN]	260	29.9	1.007	0.897	0.802	0.743	0.816	14	14	42	40	9.5	40	6.6	40	14.1	40	13.2	40	8.3
B7Z4K6	DNASE2		Deoxyribonuclease-2-alpha OS=Homo sapiens GN=DNASE2 PE=2 SV=1 - [B7Z4K6_HUMAN]	305	33.6	1.06	0.958	0.919	1.091	1.075	4	4	4	4	3.7	4	8.4	4	28.3	4	10.9	4	6
Q96M86	DNHD1	Dynein heavy chain domain-containing protein 1	Dynein heavy chain domain-containing protein 1 OS=Homo sapiens GN=DNHD1 PE=2 SV=2 - [DNHD1_HUMAN]	4753	533.3	1.123	0.928	0.979	1.076	1.019	2	2	2	2	0.1	2	8.8	2	29.1	2	13.2	2	3.8
O00429	DNM1L	Dynamin-1-like protein	Dynamin-1-like protein OS=Homo sapiens GN=DNM1L PE=1 SV=2 - [DNM1L_HUMAN]	736	81.8	1.03	1.027	1.032	1.017	1.021	21	21	37	37	7.7	37	13.1	37	16.5	37	12.2	37	7.5
P50570	DNM2	Dynamin-2	Dynamin-2 OS=Homo sapiens GN=DNM2 PE=1 SV=2 - [DYN2_HUMAN]	870	98	1	0.922	0.973	1.108	0.945	2	31	72	9	4.5	9	4.3	9	7	9	8.2	9	7.1
F5H4R9	DNM2		Dynamin-2 OS=Homo sapiens GN=DNM2 PE=2 SV=1 - [F5H4R9_HUMAN]	870	97.9	0.961	0.948	0.969	0.898	0.8	2	31	70	7	16.8	7	7.8	7	21.4	7	18.4	7	14.3
Q6XZF7	DNMBP	Dynamin-binding protein	Dynamin-binding protein OS=Homo sapiens GN=DNMBP PE=1 SV=1 - [DNMBP_HUMAN]	1577	177.2	0.886	1.156	1.039	1.141	1.057	2	2	2	2	51.4	2	15.9	2	9.4	2	15.4	2	8.5
P26358	DNMT1	DNA (cytosine-5)-methyltransferase 1	DNA (cytosine-5)-methyltransferase 1 OS=Homo sapiens GN=DNMT1 PE=1 SV=2 - [DNMT1_HUMAN]	1616	183	0.934	0.998	0.819	0.69	0.975	49	50	88	87	8.8	87	9.3	87	11.4	87	12.3	87	10.9
K7ER10	DNMT1		DNA (cytosine-5)-methyltransferase 1 (Fragment) OS=Homo sapiens GN=DNMT1 PE=4 SV=1 - [K7ER10_HUMAN]	78	8.7	1.044	0.915	0.801	0.909	1.003	1	1	1	1	NaN	1	NaN	1	NaN	1	NaN	1	NaN
Q9Y6K1	DNMT3A	ADD;C5_MTASE_1;C5_MTASE_2;PWWP	DNA (cytosine-5)-methyltransferase 3A OS=Homo sapiens GN=DNMT3A PE=1 SV=4 - [DNM3A_HUMAN]	912	101.8	0.962	1.098	1.187	1.192	1.283	14	16	20	18	10.4	18	8.4	18	16.1	18	12.6	18	9.3
Q9UBC3	DNMT3B	DNA (cytosine-5)-methyltransferase 3B	DNA (cytosine-5)-methyltransferase 3B OS=Homo sapiens GN=DNMT3B PE=1 SV=1 - [DNM3B_HUMAN]	853	95.7	0.894	0.802	1.256	1.302	0.818	3	5	5	3	17.6	3	56.9	3	38.1	3	47.5	3	32.6
Q9ULA0	DNPEP	Aspartyl aminopeptidase	Aspartyl aminopeptidase OS=Homo sapiens GN=DNPEP PE=1 SV=1 - [DNPEP_HUMAN]	475	52.4	1.017	0.927	0.858	0.856	0.817	8	14	23	14	4.8	14	15.1	14	16.7	14	10.3	14	14.6
B9ZVU2	DNPEP		Aspartyl aminopeptidase (Fragment) OS=Homo sapiens GN=DNPEP PE=2 SV=2 - [B9ZVU2_HUMAN]	270	29.8	0.963	0.974	1.054	1.048	1.02	1	7	11	2	0.8	2	14.8	2	18.1	2	13.4	2	29.4
O43598	DNPH1	2'-deoxynucleoside 5'-phosphate N-hydrolase 1	2'-deoxynucleoside 5'-phosphate N-hydrolase 1 OS=Homo sapiens GN=DNPH1 PE=1 SV=1 - [DNPH1_HUMAN]	174	19.1	1.03	0.979	1.096	1.008	1	4	4	7	7	10.3	7	6.4	7	13.1	7	11	7	9.2
Q9H147	DNTTIP1	Deoxynucleotidyltransferase terminal-interacting protein 1	Deoxynucleotidyltransferase terminal-interacting protein 1 OS=Homo sapiens GN=DNTTIP1 PE=1 SV=2 - [TDIF1_HUMAN]	329	37	0.863	0.743	0.635	0.718	0.798	5	5	5	5	18.7	5	9	5	16.2	5	19.3	5	20.5
Q5QJE6	DNTTIP2	Deoxynucleotidyltransferase terminal-interacting protein 2	Deoxynucleotidyltransferase terminal-interacting protein 2 OS=Homo sapiens GN=DNTTIP2 PE=1 SV=2 - [TDIF2_HUMAN]	756	84.4	0.776	0.668	0.514	0.448	0.679	16	16	19	19	5.8	19	9.2	19	10.2	19	10.8	19	14.5
Q96BY6	DOCK10	Dedicator of cytokinesis protein 10	Dedicator of cytokinesis protein 10 OS=Homo sapiens GN=DOCK10 PE=1 SV=3 - [DOC10_HUMAN]	2186	249.4	1.015	1.567	1.704	1.803	1.955	15	15	19	19	8.7	19	11.4	19	12.2	19	12.2	19	21.7
Q5JSL3	DOCK11	Dedicator of cytokinesis protein 11	Dedicator of cytokinesis protein 11 OS=Homo sapiens GN=DOCK11 PE=1 SV=2 - [DOC11_HUMAN]	2073	237.5	1.005	1.182	1.282	1.303	1.745	9	9	9	9	5.1	9	22.5	9	14.1	9	16.7	9	21.2
Q92608	DOCK2	Dedicator of cytokinesis protein 2	Dedicator of cytokinesis protein 2 OS=Homo sapiens GN=DOCK2 PE=1 SV=2 - [DOCK2_HUMAN]	1830	211.8	1.023	0.917	1.056	1.116	1.03	58	59	103	100	8.6	100	7.8	100	12.2	100	13	100	10.1
Q96N67	DOCK7	Dedicator of cytokinesis protein 7	Dedicator of cytokinesis protein 7 OS=Homo sapiens GN=DOCK7 PE=1 SV=4 - [DOCK7_HUMAN]	2140	242.4	1.086	1.113	1.185	1.214	1.097	2	4	5	2	26	2	20.7	2	34.1	2	29.3	2	10.5
Q8NF50	DOCK8	Dedicator of cytokinesis protein 8	Dedicator of cytokinesis protein 8 OS=Homo sapiens GN=DOCK8 PE=1 SV=3 - [DOCK8_HUMAN]	2099	238.4	1.01	1.075	1.162	1.203	1.226	29	31	40	37	8.5	37	6.4	37	6	37	9.9	37	10.4
K7EIV2	DOHH		Deoxyhypusine hydroxylase (Fragment) OS=Homo sapiens GN=DOHH PE=4 SV=1 - [K7EIV2_HUMAN]	223	24.4	0.957	0.99	0.998	0.937	0.87	4	4	8	8	5.2	8	15.7	8	12.5	8	15.6	8	16.1
H7C093	DOK1		Ecto-ADP-ribosyltransferase 4 (Fragment) OS=Homo sapiens GN=DOK1 PE=4 SV=1 - [H7C093_HUMAN]	88	9.3	0.943	1.021	1.082	1.287	1.108	1	1	1	1	NaN	1	NaN	1	NaN	1	NaN	1	NaN
O60496	DOK2	Docking protein 2	Docking protein 2 OS=Homo sapiens GN=DOK2 PE=1 SV=2 - [DOK2_HUMAN]	412	45.4	1.106	1	1.15	1.277	1.06	5	5	5	5	8.2	5	16	5	25.5	5	55.7	5	21.7
F6U2K4	DOPEY1		Protein dopey-1 OS=Homo sapiens GN=DOPEY1 PE=4 SV=1 - [F6U2K4_HUMAN]	2369	266.4	0.922	0.975	0.837	0.832	1.267	1	1	1	1	NaN	1	NaN	1	NaN	1	NaN	1	NaN
Q9Y3R5	DOPEY2	Protein dopey-2	Protein dopey-2 OS=Homo sapiens GN=DOPEY2 PE=1 SV=5 - [DOP2_HUMAN]	2298	258.1	0.903	0.974	1.199	1.106	1.228	1	2	2	1	NaN	1	NaN	1	NaN	1	NaN	1	NaN
F8W681	DPAGT1		UDP-N-acetylglucosamine--dolichyl-phosphate N-acetylglucosaminephosphotransferase OS=Homo sapiens GN=DPAGT1 PE=2 SV=1 - [F8W681_HUMAN]	57	6.4	1.067	0.867	0.976	1.067	0.836	1	1	1	1	NaN	1	NaN	1	NaN	1	NaN	1	NaN
Q5JQQ2	DPCD		Protein DPCD (Fragment) OS=Homo sapiens GN=DPCD PE=2 SV=1 - [Q5JQQ2_HUMAN]	116	13.6	0.904	0.744	0.829	0.766	0.877	1	1	1	1	NaN	1	NaN	1	NaN	1	NaN	1	NaN
Q92782	DPF1	Zinc finger protein neuro-d4	Zinc finger protein neuro-d4 OS=Homo sapiens GN=DPF1 PE=2 SV=2 - [DPF1_HUMAN]	380	42.5	0.793	0.946	0.644	0.765	0.923	1	2	2	1	NaN	1	NaN	1	NaN	1	NaN	1	NaN
Q92785	DPF2	Zinc finger protein ubi-d4	Zinc finger protein ubi-d4 OS=Homo sapiens GN=DPF2 PE=1 SV=2 - [REQU_HUMAN]	391	44.1	0.987	1.03	0.982	1.001	1.106	14	15	27	26	8.4	26	15.6	26	11	26	13.6	26	15.5
I3L1H5	DPH1	Diphthamide biosynthesis protein 1	Diphthamide biosynthesis protein 1 (Fragment) OS=Homo sapiens GN=DPH1 PE=3 SV=1 - [I3L1H5_HUMAN]	431	47.4	1.03	0.838	0.738	0.541	0.822	1	1	1	1	NaN	1	NaN	1	NaN	1	NaN	1	NaN
Q9BQC3	DPH2	Diphthamide biosynthesis protein 2	Diphthamide biosynthesis protein 2 OS=Homo sapiens GN=DPH2 PE=1 SV=1 - [DPH2_HUMAN]	489	52	0.945	0.828	0.657	0.58	0.908	4	4	5	5	7.8	5	19.6	5	5.3	5	12.5	5	6.3
Q96FX2	DPH3	DPH3 homolog	DPH3 homolog OS=Homo sapiens GN=DPH3 PE=1 SV=1 - [DPH3_HUMAN]	82	9.2	1.042	1.162	0.9	1.12	1.24	1	1	1	1	NaN	1	NaN	1	NaN	1	NaN	1	NaN
Q9H2P9	DPH5	Diphthine synthase	Diphthine synthase OS=Homo sapiens GN=DPH5 PE=1 SV=2 - [DPH5_HUMAN]	285	31.6	0.933	1.136	1.051	1.085	1.128	4	4	5	5	0.8	5	8.5	5	11.8	5	9.8	5	7.7
O60762	DPM1	Dolichol-phosphate mannosyltransferase	Dolichol-phosphate mannosyltransferase OS=Homo sapiens GN=DPM1 PE=1 SV=1 - [DPM1_HUMAN]	260	29.6	1.035	0.979	1.106	1.2	1.047	8	8	10	10	6.3	10	3.5	10	15.8	10	10.2	10	11
Q9P2X0	DPM3	Dolichol-phosphate mannosyltransferase subunit 3	Dolichol-phosphate mannosyltransferase subunit 3 OS=Homo sapiens GN=DPM3 PE=1 SV=2 - [DPM3_HUMAN]	92	10.1	1.085	0.973	1.117	1.227	1.025	2	2	3	3	6.8	3	3.7	3	3.3	3	1.7	3	2.1
Q9NY33	DPP3	Dipeptidyl peptidase 3	Dipeptidyl peptidase 3 OS=Homo sapiens GN=DPP3 PE=1 SV=2 - [DPP3_HUMAN]	737	82.5	1.018	0.987	1.032	1.108	1.096	25	25	56	56	10.8	56	11.3	56	14.3	56	15.5	56	13.2
Q9UHL4	DPP7	Dipeptidyl peptidase 2	Dipeptidyl peptidase 2 OS=Homo sapiens GN=DPP7 PE=1 SV=3 - [DPP2_HUMAN]	492	54.3	1.007	0.896	1.104	1.32	1.063	7	7	9	9	6	9	3.8	9	8.6	9	10.9	9	12.2
Q86TI2	DPP9	Dipeptidyl peptidase 9	Dipeptidyl peptidase 9 OS=Homo sapiens GN=DPP9 PE=1 SV=3 - [DPP9_HUMAN]	863	98.2	0.997	0.944	0.945	1.023	1.026	11	11	17	17	7.3	17	7.6	17	9.2	17	6.3	17	13.4
H7C3M5	DPY19L1		Probable C-mannosyltransferase DPY19L1 (Fragment) OS=Homo sapiens GN=DPY19L1 PE=4 SV=1 - [H7C3M5_HUMAN]	83	9.1	0.907	1.017	1.015	1.26	1.038	1	1	1	1	NaN	1	NaN	1	NaN	1	NaN	1	NaN
Q9C005	DPY30	Protein dpy-30 homolog	Protein dpy-30 homolog OS=Homo sapiens GN=DPY30 PE=1 SV=1 - [DPY30_HUMAN]	99	11.2	0.957	1.025	0.942	0.947	1.059	1	1	1	1	NaN	1	NaN	1	NaN	1	NaN	1	NaN
Q12882	DPYD	Dihydropyrimidine dehydrogenase [NADP(+)]	Dihydropyrimidine dehydrogenase [NADP(+)] OS=Homo sapiens GN=DPYD PE=1 SV=2 - [DPYD_HUMAN]	1025	111.3	0.983	0.898	0.884	0.791	0.821	21	21	24	24	9	24	10.1	24	11.4	24	11	24	21.8
Q16555	DPYSL2	Dihydropyrimidinase-related protein 2	Dihydropyrimidinase-related protein 2 OS=Homo sapiens GN=DPYSL2 PE=1 SV=1 - [DPYL2_HUMAN]	572	62.3	1.04	1.035	1.259	1.329	1.208	23	23	99	96	7.8	96	11.5	96	11.1	96	13.6	96	11.1
E7EWB4	DPYSL5		Dihydropyrimidinase-related protein 5 (Fragment) OS=Homo sapiens GN=DPYSL5 PE=2 SV=1 - [E7EWB4_HUMAN]	190	20.9	1.383	1.235	1.513	1.738	1.192	1	1	4	1	NaN	1	NaN	1	NaN	1	NaN	1	NaN
Q01658	DR1	Protein Dr1	Protein Dr1 OS=Homo sapiens GN=DR1 PE=1 SV=1 - [NC2B_HUMAN]	176	19.4	1.004	0.973	1.003	1.048	1.03	4	4	9	9	5.7	9	9.2	9	8.5	9	7.9	9	5.6
Q14919	DRAP1	Dr1-associated corepressor	Dr1-associated corepressor OS=Homo sapiens GN=DRAP1 PE=1 SV=3 - [NC2A_HUMAN]	205	22.3	1.008	0.986	1.058	1.079	1.023	4	4	7	7	7.6	7	11	7	15.4	7	20.1	7	6.3
Q9Y295	DRG1	Developmentally-regulated GTP-binding protein 1	Developmentally-regulated GTP-binding protein 1 OS=Homo sapiens GN=DRG1 PE=1 SV=1 - [DRG1_HUMAN]	367	40.5	0.989	0.923	0.856	0.802	0.849	13	14	26	25	5.3	25	10.5	25	11.6	25	7.9	25	9.9
P55039	DRG2	Developmentally-regulated GTP-binding protein 2	Developmentally-regulated GTP-binding protein 2 OS=Homo sapiens GN=DRG2 PE=1 SV=1 - [DRG2_HUMAN]	364	40.7	0.964	0.972	0.96	0.91	0.902	8	9	12	10	6.7	10	10.8	10	16.5	10	5.8	10	5.3
Q9BVC3	DSCC1	Sister chromatid cohesion protein DCC1	Sister chromatid cohesion protein DCC1 OS=Homo sapiens GN=DSCC1 PE=1 SV=2 - [DCC1_HUMAN]	393	44.8	0.992	0.986	1.004	0.963	1.035	7	7	10	10	7.6	10	9.9	10	7.5	10	7.3	10	6.4
A8MTY9	DSCR3		Down syndrome critical region protein 3 OS=Homo sapiens GN=DSCR3 PE=2 SV=1 - [A8MTY9_HUMAN]	249	27.9	1.069	0.976	1.038	1.069	0.978	4	4	5	5	20.6	5	13.5	5	8.2	5	3.9	5	13.1
Q9H410	DSN1	Kinetochore-associated protein DSN1 homolog	Kinetochore-associated protein DSN1 homolog OS=Homo sapiens GN=DSN1 PE=1 SV=2 - [DSN1_HUMAN]	356	40	0.984	1.037	0.968	0.871	1.056	9	9	10	10	3.6	10	6.2	10	10.8	10	8.2	10	7.2
P15924	DSP	Desmoplakin	Desmoplakin OS=Homo sapiens GN=DSP PE=1 SV=3 - [DESP_HUMAN]	2871	331.6	0.79	1.25	9.028	1.974	0.772	2	2	2	2	126.2	2	60.7	2	4.2	2	61.1	2	178.3
P60981	DSTN	Destrin	Destrin OS=Homo sapiens GN=DSTN PE=1 SV=3 - [DEST_HUMAN]	165	18.5	1.008	0.957	1.064	1.042	1.005	8	9	21	19	4.8	19	11	19	11.6	19	8	19	14.1
Q8TEA8	DTD1	D-tyrosyl-tRNA(Tyr) deacylase 1	D-tyrosyl-tRNA(Tyr) deacylase 1 OS=Homo sapiens GN=DTD1 PE=1 SV=2 - [DTD1_HUMAN]	209	23.4	0.982	0.987	0.957	0.889	1.011	5	5	10	10	7.3	10	7.1	10	13.7	10	11.4	10	17.4
F5GZ90	DTL		Denticleless protein homolog OS=Homo sapiens GN=DTL PE=2 SV=1 - [F5GZ90_HUMAN]	688	75	1.13	0.998	0.731	0.781	1.132	4	4	4	4	3.2	4	1.7	4	8.7	4	2.1	4	6.1
M0QZ28	DTNA		Dystrobrevin alpha OS=Homo sapiens GN=DTNA PE=4 SV=1 - [M0QZ28_HUMAN]	365	40.9	0.821	1.024	1.067	1.26	0.985	1	1	1	1	NaN	1	NaN	1	NaN	1	NaN	1	NaN
Q96EV8	DTNBP1	Dysbindin	Dysbindin OS=Homo sapiens GN=DTNBP1 PE=1 SV=1 - [DTBP1_HUMAN]	351	39.5	1.168	0.932	0.936	1.035	1.098	3	3	3	3	18.4	3	0.4	3	28.1	3	17.7	3	1.3
Q8N5C7	DTWD1	DTW domain-containing protein 1	DTW domain-containing protein 1 OS=Homo sapiens GN=DTWD1 PE=2 SV=1 - [DTWD1_HUMAN]	304	35.2	0.958	1.172	1.082	1.124	1.577	1	1	1	1	NaN	1	NaN	1	NaN	1	NaN	1	NaN
Q8NBA8	DTWD2	DTW domain-containing protein 2	DTW domain-containing protein 2 OS=Homo sapiens GN=DTWD2 PE=2 SV=1 - [DTWD2_HUMAN]	298	33.4	0.97	1.048	1.012	1.102	1.13	3	3	7	7	6.5	7	5.8	7	19.2	7	14.2	7	15.4
Q8TDB6	DTX3L	E3 ubiquitin-protein ligase DTX3L	E3 ubiquitin-protein ligase DTX3L OS=Homo sapiens GN=DTX3L PE=1 SV=1 - [DTX3L_HUMAN]	740	83.5	0.887	1.041	0.88	0.904	1.102	13	13	14	14	4.1	14	5.4	14	7.5	14	10.4	14	8.6
P23919	DTYMK	Thymidylate kinase	Thymidylate kinase OS=Homo sapiens GN=DTYMK PE=1 SV=4 - [KTHY_HUMAN]	212	23.8	1.015	0.927	1.023	1.113	1.087	8	8	13	13	3.9	13	5.6	13	6	13	7	13	7.7
H0YGW8	DUS1L		tRNA-dihydrouridine(16/17) synthase [NAD(P)(+)]-like (Fragment) OS=Homo sapiens GN=DUS1L PE=4 SV=2 - [H0YGW8_HUMAN]	298	33.7	1.044	1.07	1.006	1.119	1.068	4	4	5	5	20	5	4.2	5	3.3	5	7.3	5	16.2
Q96G46	DUS3L	tRNA-dihydrouridine(47) synthase [NAD(P)(+)]-like	tRNA-dihydrouridine(47) synthase [NAD(P)(+)]-like OS=Homo sapiens GN=DUS3L PE=1 SV=2 - [DUS3L_HUMAN]	650	72.5	0.962	0.984	0.948	0.926	0.976	16	16	23	23	5.7	23	11.5	23	11.7	23	14.6	23	6.9
H7C0E6	DUSP11		RNA/RNP complex-1-interacting phosphatase (Fragment) OS=Homo sapiens GN=DUSP11 PE=2 SV=1 - [H7C0E6_HUMAN]	150	17.8	0.445	0.412	0.335	0.355	0.459	2	2	2	2	11.4	2	2.8	2	12.6	2	15.1	2	11.1
Q9UNI6	DUSP12	Dual specificity protein phosphatase 12	Dual specificity protein phosphatase 12 OS=Homo sapiens GN=DUSP12 PE=1 SV=1 - [DUS12_HUMAN]	340	37.7	0.949	1.12	1.106	1.188	1.003	7	7	10	9	8.2	10	10.4	9	9.4	10	5.3	10	8.4
P51452	DUSP3	Dual specificity protein phosphatase 3	Dual specificity protein phosphatase 3 OS=Homo sapiens GN=DUSP3 PE=1 SV=1 - [DUS3_HUMAN]	185	20.5	1.017	0.864	0.962	0.998	0.875	5	5	10	10	4.4	10	6.2	10	8.5	10	8.6	10	7.6
F8VW29	DUSP6		Dual-specificity protein phosphatase 6 OS=Homo sapiens GN=DUSP6 PE=2 SV=1 - [F8VW29_HUMAN]	256	28	1.45	1.296	1.193	1.389	1.581	1	1	1	1	NaN	1	NaN	1	NaN	1	NaN	1	NaN
H0YNW5	DUT		Deoxyuridine 5'-triphosphate nucleotidohydrolase, mitochondrial OS=Homo sapiens GN=DUT PE=2 SV=1 - [H0YNW5_HUMAN]	167	17.8	1.044	1.038	0.948	0.845	1.118	8	8	37	37	7.5	37	6.9	37	14.2	37	12.3	37	7.1
I3L2W9	DVL2		Segment polarity protein dishevelled homolog DVL-2 (Fragment) OS=Homo sapiens GN=DVL2 PE=2 SV=1 - [I3L2W9_HUMAN]	363	39.9	0.884	1.155	1.069	1.301	1.223	4	4	4	4	16.5	4	13.6	4	11.9	4	10.5	4	4.6
Q7RTS9	DYM	Dymeclin	Dymeclin OS=Homo sapiens GN=DYM PE=1 SV=1 - [DYM_HUMAN]	669	75.9	0.857	0.942	0.855	0.726	0.736	1	2	2	1	NaN	1	NaN	1	NaN	1	NaN	1	NaN
Q14204	DYNC1H1	Cytoplasmic dynein 1 heavy chain 1	Cytoplasmic dynein 1 heavy chain 1 OS=Homo sapiens GN=DYNC1H1 PE=1 SV=5 - [DYHC1_HUMAN]	4646	532.1	1.001	1.012	1.065	1.078	1.093	155	155	285	285	6.9	285	8.6	285	10.1	284	10.9	285	9.6
B7ZA04	DYNC1I2		Cytoplasmic dynein 1 intermediate chain 2 OS=Homo sapiens GN=DYNC1I2 PE=2 SV=1 - [B7ZA04_HUMAN]	630	70.4	1.023	1.109	1.235	1.316	1.16	5	12	29	14	20.5	14	19.1	14	22.2	14	12.1	14	16.9
E7EQL5	DYNC1I2		Cytoplasmic dynein 1 intermediate chain 2 (Fragment) OS=Homo sapiens GN=DYNC1I2 PE=2 SV=1 - [E7EQL5_HUMAN]	305	34.9	0.971	0.969	0.709	0.643	1.082	1	8	18	3	2.1	3	0.6	3	13	3	5.8	3	2.6
Q9Y6G9	DYNC1LI1	Cytoplasmic dynein 1 light intermediate chain 1	Cytoplasmic dynein 1 light intermediate chain 1 OS=Homo sapiens GN=DYNC1LI1 PE=1 SV=3 - [DC1L1_HUMAN]	523	56.5	0.995	1.01	0.997	1.054	1.091	9	10	19	17	6.1	17	8.7	17	18.2	17	12.8	17	11.5
O43237	DYNC1LI2	Cytoplasmic dynein 1 light intermediate chain 2	Cytoplasmic dynein 1 light intermediate chain 2 OS=Homo sapiens GN=DYNC1LI2 PE=1 SV=1 - [DC1L2_HUMAN]	492	54.1	0.953	0.896	0.965	0.789	1.043	2	3	4	2	26.7	2	24.2	2	35.9	2	36.2	2	16.3
P63167	DYNLL1	Dynein light chain 1, cytoplasmic	Dynein light chain 1, cytoplasmic OS=Homo sapiens GN=DYNLL1 PE=1 SV=1 - [DYL1_HUMAN]	89	10.4	0.916	1.142	1.242	1.294	1.049	1	2	18	14	13.7	14	6.7	14	9	14	9.6	14	4
Q96FJ2	DYNLL2	Dynein light chain 2, cytoplasmic	Dynein light chain 2, cytoplasmic OS=Homo sapiens GN=DYNLL2 PE=1 SV=1 - [DYL2_HUMAN]	89	10.3	0.984	1.149	1.303	1.253	1.193	2	3	13	10	16.3	10	13.9	10	3.6	10	9.3	10	21.3
Q9NP97	DYNLRB1	Dynein light chain roadblock-type 1	Dynein light chain roadblock-type 1 OS=Homo sapiens GN=DYNLRB1 PE=1 SV=3 - [DLRB1_HUMAN]	96	10.9	0.822	1.016	1.14	1.225	1.152	4	4	8	8	2.8	8	9.4	8	6.6	8	10.3	8	5.4
P63172	DYNLT1	Dynein light chain Tctex-type 1	Dynein light chain Tctex-type 1 OS=Homo sapiens GN=DYNLT1 PE=1 SV=1 - [DYLT1_HUMAN]	113	12.4	1.112	1.06	1.164	1.258	1.118	2	2	3	3	2.2	3	22.1	3	9.3	3	9.7	3	1.5
F8W9I9	DYRK1A		Dual-specificity tyrosine-phosphorylation-regulated kinase 1A OS=Homo sapiens GN=DYRK1A PE=2 SV=1 - [F8W9I9_HUMAN]	541	61.8	1.048	0.894	0.935	1.023	0.894	9	9	9	9	3.7	9	7.7	9	7.7	9	8.5	9	7.6
H0YFI4	DYRK4		Dual-specificity tyrosine-phosphorylation-regulated kinase 4 (Fragment) OS=Homo sapiens GN=DYRK4 PE=4 SV=1 - [H0YFI4_HUMAN]	120	13.9	0.978	1.253	1.367	1.269	1.033	1	1	1	1	NaN	1	NaN	1	NaN	1	NaN	1	NaN
O00716	E2F3	Transcription factor E2F3	Transcription factor E2F3 OS=Homo sapiens GN=E2F3 PE=1 SV=1 - [E2F3_HUMAN]	465	49.1	0.815	0.93	0.742	0.675	0.862	3	3	3	3	6	3	4.7	3	15.4	3	12.9	3	3.9
G3V2W9	EAPP		E2F-associated phosphoprotein (Fragment) OS=Homo sapiens GN=EAPP PE=2 SV=1 - [G3V2W9_HUMAN]	205	23.5	0.907	1.382	1.291	1.285	1.12	1	1	1	1	NaN	1	NaN	1	NaN	1	NaN	1	NaN
H3BTB7	EARS2		Probable glutamate--tRNA ligase, mitochondrial OS=Homo sapiens GN=EARS2 PE=2 SV=1 - [H3BTB7_HUMAN]	506	56.8	0.98	0.962	0.991	0.973	0.893	9	9	11	11	3.9	11	7.1	11	4.9	11	5.2	11	9.3
E9PND3	EBAG9		Receptor-binding cancer antigen-expressed on SiSo cells OS=Homo sapiens GN=EBAG9 PE=2 SV=1 - [E9PND3_HUMAN]	153	17.1	1.074	1.144	0.996	0.936	0.943	2	2	7	4	0.7	4	13.7	4	1.1	4	16.7	4	4.5
Q99848	EBNA1BP2	Probable rRNA-processing protein EBP2	Probable rRNA-processing protein EBP2 OS=Homo sapiens GN=EBNA1BP2 PE=1 SV=2 - [EBP2_HUMAN]	306	34.8	0.963	1.081	0.943	0.795	1.007	9	9	16	16	5.7	16	9.2	16	9.1	16	12.6	16	6.2
Q15125	EBP	3-beta-hydroxysteroid-Delta(8),Delta(7)-isomerase	3-beta-hydroxysteroid-Delta(8),Delta(7)-isomerase OS=Homo sapiens GN=EBP PE=1 SV=3 - [EBP_HUMAN]	230	26.3	0.995	1.232	1.598	1.768	1.114	2	2	4	4	0.4	4	3.4	4	11	4	19.6	4	7.1
B4DKB2	ECE1		Endothelin-converting enzyme 1 OS=Homo sapiens GN=ECE1 PE=2 SV=1 - [B4DKB2_HUMAN]	738	83.5	0.784	0.948	0.987	0.98	0.997	2	2	3	3	8.9	3	4.5	3	6.6	3	11	3	2.6
O60344	ECE2	Endothelin-converting enzyme 2;Endothelin-converting enzyme 2 region;Methyltransferase-like region	Endothelin-converting enzyme 2 OS=Homo sapiens GN=ECE2 PE=1 SV=4 - [ECE2_HUMAN]	883	99.7	0.935	1.054	0.844	0.749	1.173	1	1	3	3	18.3	3	6.3	3	31.7	3	18.3	3	6.2
Q13011	ECH1	Delta(3,5)-Delta(2,4)-dienoyl-CoA isomerase, mitochondrial	Delta(3,5)-Delta(2,4)-dienoyl-CoA isomerase, mitochondrial OS=Homo sapiens GN=ECH1 PE=1 SV=2 - [ECH1_HUMAN]	328	35.8	1.014	0.887	1.087	1.136	0.869	11	11	42	40	6.2	40	14.2	40	9	40	7	40	13.7
Q9NTX5	ECHDC1	Ethylmalonyl-CoA decarboxylase	Ethylmalonyl-CoA decarboxylase OS=Homo sapiens GN=ECHDC1 PE=1 SV=2 - [ECHD1_HUMAN]	307	33.7	0.974	1.148	1.349	1.357	1.182	12	12	26	26	7.7	26	6.7	26	9.4	26	10.8	26	9.1
P30084	ECHS1	Enoyl-CoA hydratase, mitochondrial	Enoyl-CoA hydratase, mitochondrial OS=Homo sapiens GN=ECHS1 PE=1 SV=4 - [ECHM_HUMAN]	290	31.4	1.045	0.929	1.046	1.137	0.939	14	14	28	28	7	28	6.4	28	5.2	28	8.4	28	11.3
H3BS70	ECI1		Enoyl-CoA delta isomerase 1, mitochondrial (Fragment) OS=Homo sapiens GN=ECI1 PE=2 SV=1 - [H3BS70_HUMAN]	224	24.7	1.097	0.925	1.087	1.21	1.007	3	3	4	4	15	4	20.6	4	11.2	4	3.6	4	21.7
O75521	ECI2	Enoyl-CoA delta isomerase 2, mitochondrial	Enoyl-CoA delta isomerase 2, mitochondrial OS=Homo sapiens GN=ECI2 PE=1 SV=4 - [ECI2_HUMAN]	394	43.6	1.044	0.989	1.089	1.11	0.905	12	12	35	35	3.4	35	10.6	35	12	35	9.8	35	10.7
Q5VYK3	ECM29	Proteasome-associated protein ECM29 homolog	Proteasome-associated protein ECM29 homolog OS=Homo sapiens GN=ECM29 PE=1 SV=2 - [ECM29_HUMAN]	1845	204.2	1.001	0.997	0.997	0.972	0.96	26	26	35	35	9.1	35	12.2	35	8.9	35	12.3	35	7.1
K7EMM0	ECSIT		Evolutionarily conserved-signaling intermediate in Toll pathway, mitochondrial OS=Homo sapiens GN=ECSIT PE=4 SV=1 - [K7EMM0_HUMAN]	296	33.9	0.996	0.986	0.788	0.71	0.785	3	3	4	4	14.6	4	7.5	4	6.2	4	9.1	4	1.2
Q9H8V3	ECT2	Protein ECT2	Protein ECT2 OS=Homo sapiens GN=ECT2 PE=1 SV=4 - [ECT2_HUMAN]	914	103.4	0.674	0.811	1.102	1.161	0.925	7	7	7	7	16.9	7	19.6	7	8	7	14.2	7	11.2
Q96F86	EDC3	Enhancer of mRNA-decapping protein 3	Enhancer of mRNA-decapping protein 3 OS=Homo sapiens GN=EDC3 PE=1 SV=1 - [EDC3_HUMAN]	508	56	0.94	0.991	0.94	0.882	0.88	12	12	16	15	9.5	15	12	15	12.6	15	8.5	15	8
Q6P2E9	EDC4	Enhancer of mRNA-decapping protein 4	Enhancer of mRNA-decapping protein 4 OS=Homo sapiens GN=EDC4 PE=1 SV=1 - [EDC4_HUMAN]	1401	151.6	1.016	1.004	1.005	0.952	1.042	29	29	55	55	7.1	55	8.2	55	9.7	55	11.9	55	8.5
B4DXP3	EDEM1		ER degradation-enhancing alpha-mannosidase-like protein 1 OS=Homo sapiens GN=EDEM1 PE=2 SV=1 - [B4DXP3_HUMAN]	376	42.6	1.075	1.003	0.956	0.94	0.803	2	2	2	2	3.9	2	12.4	2	11	2	15.9	2	14.2
F5GZ44	EDEM2		ER degradation-enhancing alpha-mannosidase-like protein 2 OS=Homo sapiens GN=EDEM2 PE=2 SV=1 - [F5GZ44_HUMAN]	404	45	0.891	1.035	0.893	0.94	1.126	1	1	1	1	NaN	1	NaN	1	NaN	1	NaN	1	NaN
O60869	EDF1	Endothelial differentiation-related factor 1	Endothelial differentiation-related factor 1 OS=Homo sapiens GN=EDF1 PE=1 SV=1 - [EDF1_HUMAN]	148	16.4	1.068	0.91	0.902	0.89	1.029	8	8	12	12	11.5	12	6.4	12	14.4	12	10.9	12	9.6
Q15075	EEA1	Early endosome antigen 1	Early endosome antigen 1 OS=Homo sapiens GN=EEA1 PE=1 SV=2 - [EEA1_HUMAN]	1411	162.4	0.988	1.006	0.964	0.951	1.039	55	55	72	72	6.3	72	7.9	72	8.1	72	8	72	9.8
O75530	EED	Polycomb protein EED	Polycomb protein EED OS=Homo sapiens GN=EED PE=1 SV=2 - [EED_HUMAN]	441	50.2	1.047	0.996	1.013	0.952	0.945	14	14	18	18	5.6	18	5.9	18	11.8	18	9.4	18	7.3
P68104	EEF1A1	Elongation factor 1-alpha 1	Elongation factor 1-alpha 1 OS=Homo sapiens GN=EEF1A1 PE=1 SV=1 - [EF1A1_HUMAN]	462	50.1	1.006	1.025	1.031	1.043	1.003	23	23	292	273	7.8	273	16.2	273	18.1	273	17.9	273	9.9
P24534	EEF1B2	Elongation factor 1-beta	Elongation factor 1-beta OS=Homo sapiens GN=EEF1B2 PE=1 SV=3 - [EF1B_HUMAN]	225	24.7	1.002	1.058	1.022	0.998	0.998	10	11	37	35	4.4	35	8	35	13.6	35	8.8	35	12.6
P29692	EEF1D	Elongation factor 1-delta	Elongation factor 1-delta OS=Homo sapiens GN=EEF1D PE=1 SV=5 - [EF1D_HUMAN]	281	31.1	0.924	1.069	1.232	1.152	1.011	6	13	49	17	8.6	17	5.5	17	7.7	17	6.4	17	16.3
E9PL71	EEF1D		Elongation factor 1-delta (Fragment) OS=Homo sapiens GN=EEF1D PE=2 SV=1 - [E9PL71_HUMAN]	187	20.8	0.846	1.116	0.849	0.851	0.893	1	7	34	3	9.4	3	0.5	3	8.9	3	14.9	3	16.9
E9PK06	EEF1D		Elongation factor 1-delta (Fragment) OS=Homo sapiens GN=EEF1D PE=2 SV=1 - [E9PK06_HUMAN]	140	15.3	1.046	1.159	1.24	0.943	1.061	1	5	27	1	NaN	1	NaN	1	NaN	1	NaN	1	NaN
O43324	EEF1E1	Eukaryotic translation elongation factor 1 epsilon-1	Eukaryotic translation elongation factor 1 epsilon-1 OS=Homo sapiens GN=EEF1E1 PE=1 SV=1 - [MCA3_HUMAN]	174	19.8	1.033	0.891	0.86	0.839	0.852	6	6	17	17	3.3	17	5.9	17	4.6	17	5.4	17	6.3
P26641	EEF1G	Elongation factor 1-gamma	Elongation factor 1-gamma OS=Homo sapiens GN=EEF1G PE=1 SV=3 - [EF1G_HUMAN]	437	50.1	1.044	0.929	0.98	0.926	1	17	17	70	67	4.4	67	9	67	25.4	67	10.7	67	11.3
P13639	EEF2	Elongation factor 2	Elongation factor 2 OS=Homo sapiens GN=EEF2 PE=1 SV=4 - [EF2_HUMAN]	858	95.3	1.01	0.993	0.942	0.786	0.889	37	38	211	206	9	206	9.7	206	12.7	206	14.3	206	12.7
O00418	EEF2K	Eukaryotic elongation factor 2 kinase	Eukaryotic elongation factor 2 kinase OS=Homo sapiens GN=EEF2K PE=1 SV=2 - [EF2K_HUMAN]	725	82.1	0.963	1.036	1.263	1.255	1.284	5	5	6	6	12.3	6	18	6	8.5	6	9.9	6	23.2
P57772	EEFSEC	Selenocysteine-specific elongation factor	Selenocysteine-specific elongation factor OS=Homo sapiens GN=EEFSEC PE=1 SV=4 - [SELB_HUMAN]	596	65.3	0.998	1.013	1.109	1.145	1.028	9	9	11	11	7.8	11	5.5	11	4.4	11	4.4	11	8.1
Q9BSW2	EFCAB4B	EF-hand calcium-binding domain-containing protein 4B	EF-hand calcium-binding domain-containing protein 4B OS=Homo sapiens GN=EFCAB4B PE=1 SV=1 - [EFC4B_HUMAN]	395	45.6	0.948	0.99	0.969	0.974	1.096	4	4	4	4	7.8	4	9.8	4	18.5	4	18.3	4	10.6
Q96C19	EFHD2	EF-hand domain-containing protein D2	EF-hand domain-containing protein D2 OS=Homo sapiens GN=EFHD2 PE=1 SV=1 - [EFHD2_HUMAN]	240	26.7	0.991	1.003	1.745	1.097	1.013	13	13	21	21	6.6	21	11.2	21	30.4	21	23.2	21	4.4
Q7Z2Z2	EFTUD1	Elongation factor Tu GTP-binding domain-containing protein 1	Elongation factor Tu GTP-binding domain-containing protein 1 OS=Homo sapiens GN=EFTUD1 PE=1 SV=2 - [ETUD1_HUMAN]	1120	125.3	0.992	0.948	1.081	1.055	1.039	20	20	24	23	5.2	23	8.4	23	14.1	23	10.8	23	8.3
Q15029	EFTUD2	116 kDa U5 small nuclear ribonucleoprotein component	116 kDa U5 small nuclear ribonucleoprotein component OS=Homo sapiens GN=EFTUD2 PE=1 SV=1 - [U5S1_HUMAN]	972	109.4	0.993	1.063	1.004	0.933	1.013	40	41	105	99	8.8	99	11	99	14	99	14.9	99	8.6
Q9GZT9	EGLN1	Egl nine homolog 1	Egl nine homolog 1 OS=Homo sapiens GN=EGLN1 PE=1 SV=1 - [EGLN1_HUMAN]	426	46	1.043	0.971	1.077	1.063	0.994	14	14	20	20	8	20	8.2	20	13.3	20	10.3	20	12.7
Q8NDI1	EHBP1	EH domain-binding protein 1	EH domain-binding protein 1 OS=Homo sapiens GN=EHBP1 PE=1 SV=3 - [EHBP1_HUMAN]	1231	139.9	0.927	1.149	1.135	0.952	1.238	1	2	2	1	NaN	1	NaN	1	NaN	1	NaN	1	NaN
Q8N3D4	EHBP1L1	EH domain-binding protein 1-like protein 1	EH domain-binding protein 1-like protein 1 OS=Homo sapiens GN=EHBP1L1 PE=1 SV=2 - [EH1L1_HUMAN]	1523	161.8	0.915	1.093	1.273	1.291	1.013	2	3	3	2	16.9	2	13.4	2	10.6	2	5	2	11.9
Q9H4M9	EHD1	EH domain-containing protein 1	EH domain-containing protein 1 OS=Homo sapiens GN=EHD1 PE=1 SV=2 - [EHD1_HUMAN]	534	60.6	1.038	1.122	1.182	1.167	1.146	17	17	36	36	7.8	36	9.6	36	21.6	36	19.4	36	13.4
Q9H9B1	EHMT1	Histone-lysine N-methyltransferase EHMT1	Histone-lysine N-methyltransferase EHMT1 OS=Homo sapiens GN=EHMT1 PE=1 SV=4 - [EHMT1_HUMAN]	1298	141.4	0.948	0.972	0.891	0.926	1.129	11	11	12	12	12.9	12	9.2	12	12.6	12	9	12	11.4
Q96KQ7	EHMT2	Histone-lysine N-methyltransferase EHMT2	Histone-lysine N-methyltransferase EHMT2 OS=Homo sapiens GN=EHMT2 PE=1 SV=3 - [EHMT2_HUMAN]	1210	132.3	1.025	0.961	0.88	0.842	1.172	8	8	9	9	15.4	9	18	9	11.4	9	12.4	9	10.5
E9PL33	EI24		Etoposide-induced protein 2.4 homolog (Fragment) OS=Homo sapiens GN=EI24 PE=2 SV=1 - [E9PL33_HUMAN]	125	14.6	0.943	1.051	1.185	1.178	1.247	1	1	1	1	NaN	1	NaN	1	NaN	1	NaN	1	NaN
E9PLI6	EIF1AD		Probable RNA-binding protein EIF1AD (Fragment) OS=Homo sapiens GN=EIF1AD PE=2 SV=1 - [E9PLI6_HUMAN]	113	13.1	0.758	0.941	0.812	0.888	0.856	4	4	7	7	3.1	7	3.8	7	8.4	7	9.8	7	7.9
P47813	EIF1AX	Eukaryotic translation initiation factor 1A, X-chromosomal	Eukaryotic translation initiation factor 1A, X-chromosomal OS=Homo sapiens GN=EIF1AX PE=1 SV=2 - [IF1AX_HUMAN]	144	16.5	1.022	1.03	0.952	1.022	0.991	6	6	16	16	5	16	4.3	16	8	16	6.8	16	8.3
O60739	EIF1B	Eukaryotic translation initiation factor 1b	Eukaryotic translation initiation factor 1b OS=Homo sapiens GN=EIF1B PE=1 SV=2 - [EIF1B_HUMAN]	113	12.8	0.989	0.98	1.019	0.977	0.824	5	5	19	17	9	17	7.7	17	10.1	17	8.4	17	12.1
Q9BY44	EIF2A	Eukaryotic translation initiation factor 2A	Eukaryotic translation initiation factor 2A OS=Homo sapiens GN=EIF2A PE=1 SV=3 - [EIF2A_HUMAN]	585	64.9	1.028	1.033	0.981	0.937	0.936	19	20	33	32	6.4	32	9.7	32	9.8	32	8.7	32	9
B4DIP4	EIF2AK1		Eukaryotic translation initiation factor 2-alpha kinase 1 OS=Homo sapiens GN=EIF2AK1 PE=2 SV=1 - [B4DIP4_HUMAN]	577	65.2	0.571	0.96	0.611	0.353	0.824	1	1	1	1	NaN	1	NaN	1	NaN	1	NaN	1	NaN
P19525	EIF2AK2	Interferon-induced, double-stranded RNA-activated protein kinase	Interferon-induced, double-stranded RNA-activated protein kinase OS=Homo sapiens GN=EIF2AK2 PE=1 SV=2 - [E2AK2_HUMAN]	551	62.1	0.977	1.033	0.991	0.938	0.907	17	17	25	25	7	25	9.4	25	7.7	25	11.7	25	11.9
H0YME5	EIF2AK4		Eukaryotic translation initiation factor 2-alpha kinase 4 (Fragment) OS=Homo sapiens GN=EIF2AK4 PE=4 SV=1 - [H0YME5_HUMAN]	1427	161.1	0.898	0.988	1.12	1.136	1.273	4	4	4	4	1.5	4	5.8	4	19.7	4	9.5	4	7.8
Q14232	EIF2B1	Translation initiation factor eIF-2B subunit alpha	Translation initiation factor eIF-2B subunit alpha OS=Homo sapiens GN=EIF2B1 PE=1 SV=1 - [EI2BA_HUMAN]	305	33.7	1.029	0.965	0.996	0.967	0.911	15	15	33	33	9.6	33	8.3	33	9.6	33	15.8	33	13.7
P49770	EIF2B2	Translation initiation factor eIF-2B subunit beta	Translation initiation factor eIF-2B subunit beta OS=Homo sapiens GN=EIF2B2 PE=1 SV=3 - [EI2BB_HUMAN]	351	39	0.936	1.144	0.985	0.906	0.989	6	6	10	10	7	10	5.1	10	11.5	10	14.2	10	5.6
Q9NR50	EIF2B3	Translation initiation factor eIF-2B subunit gamma	Translation initiation factor eIF-2B subunit gamma OS=Homo sapiens GN=EIF2B3 PE=1 SV=1 - [EI2BG_HUMAN]	452	50.2	0.967	1.019	0.998	0.967	1.012	9	9	9	9	3.8	9	8.1	9	10.4	9	9.1	9	6.7
Q9UI10	EIF2B4	Translation initiation factor eIF-2B subunit delta	Translation initiation factor eIF-2B subunit delta OS=Homo sapiens GN=EIF2B4 PE=1 SV=2 - [EI2BD_HUMAN]	523	57.5	0.889	1.039	0.885	0.949	0.985	9	9	10	9	8.5	10	4.4	10	14.3	10	8.2	10	10.4
E9PC74	EIF2B5		Translation initiation factor eIF-2B subunit epsilon OS=Homo sapiens GN=EIF2B5 PE=2 SV=1 - [E9PC74_HUMAN]	705	78.3	0.97	1.009	0.96	0.96	0.984	9	9	10	10	7.5	10	10.5	10	19.1	10	15	10	10.2
Q9UKV8	EIF2C2	Protein argonaute-2	Protein argonaute-2 OS=Homo sapiens GN=AGO2 PE=1 SV=3 - [AGO2_HUMAN]	859	97.1	0.982	0.963	0.959	0.962	0.938	14	18	22	18	7.5	18	5.6	18	14.6	18	10.7	18	9.8
Q9H9G7	EIF2C3	Protein argonaute-3	Protein argonaute-3 OS=Homo sapiens GN=AGO3 PE=1 SV=2 - [AGO3_HUMAN]	860	97.3	1.076	1.025	1.063	1.305	0.96	2	5	5	2	5.7	2	18.4	2	17.8	2	4.2	2	25.2
P41214	EIF2D	Eukaryotic translation initiation factor 2D	Eukaryotic translation initiation factor 2D OS=Homo sapiens GN=EIF2D PE=1 SV=3 - [EIF2D_HUMAN]	584	64.7	0.972	1.027	0.962	0.877	0.928	8	8	12	12	8.8	12	9.5	12	11	12	10.8	12	13.2
P05198	EIF2S1	Eukaryotic translation initiation factor 2 subunit 1	Eukaryotic translation initiation factor 2 subunit 1 OS=Homo sapiens GN=EIF2S1 PE=1 SV=3 - [IF2A_HUMAN]	315	36.1	1.024	0.937	0.937	0.907	0.89	22	22	56	56	8.2	54	14.8	56	13.5	54	10.2	56	16.3
P20042	EIF2S2	Eukaryotic translation initiation factor 2 subunit 2	Eukaryotic translation initiation factor 2 subunit 2 OS=Homo sapiens GN=EIF2S2 PE=1 SV=2 - [IF2B_HUMAN]	333	38.4	0.98	1.026	1.003	0.943	0.912	14	14	36	36	5.9	36	11.3	36	15.6	36	14.7	36	15.9
P41091	EIF2S3	Eukaryotic translation initiation factor 2 subunit 3	Eukaryotic translation initiation factor 2 subunit 3 OS=Homo sapiens GN=EIF2S3 PE=1 SV=3 - [IF2G_HUMAN]	472	51.1	1.045	0.967	0.945	0.909	0.895	13	13	29	29	5.4	29	11.6	29	11.8	29	9.9	29	9.4
Q14152	EIF3A	Eukaryotic translation initiation factor 3 subunit A	Eukaryotic translation initiation factor 3 subunit A OS=Homo sapiens GN=EIF3A PE=1 SV=1 - [EIF3A_HUMAN]	1382	166.5	0.998	0.941	0.818	0.72	0.932	49	49	109	108	6.6	108	9.2	108	13.6	108	15.5	108	12.4
P55884	EIF3B	Eukaryotic translation initiation factor 3 subunit B	Eukaryotic translation initiation factor 3 subunit B OS=Homo sapiens GN=EIF3B PE=1 SV=3 - [EIF3B_HUMAN]	814	92.4	0.98	0.915	0.827	0.689	0.89	29	29	73	72	6.4	72	8.3	72	11.5	72	10.8	72	11.6
H3BRV0	EIF3C	Eukaryotic translation initiation factor 3 subunit C	Eukaryotic translation initiation factor 3 subunit C OS=Homo sapiens GN=EIF3C PE=2 SV=1 - [H3BRV0_HUMAN]	903	104	0.972	0.96	0.852	0.707	0.965	28	28	61	59	7.9	59	6.8	59	11.7	59	14.3	59	10.1
B4DVY1	EIF3D	Eukaryotic translation initiation factor 3 subunit D	Eukaryotic translation initiation factor 3 subunit D OS=Homo sapiens GN=EIF3D PE=2 SV=1 - [B4DVY1_HUMAN]	499	58.1	0.937	0.924	0.834	0.726	0.856	16	16	52	52	7.7	52	11.2	52	10	52	15	52	9.6
P60228	EIF3E	Eukaryotic translation initiation factor 3 subunit E	Eukaryotic translation initiation factor 3 subunit E OS=Homo sapiens GN=EIF3E PE=1 SV=1 - [EIF3E_HUMAN]	445	52.2	0.985	0.918	0.816	0.701	0.861	16	16	46	46	10.5	46	9.6	46	9.3	46	13.9	46	11.3
O00303	EIF3F	Eukaryotic translation initiation factor 3 subunit F	Eukaryotic translation initiation factor 3 subunit F OS=Homo sapiens GN=EIF3F PE=1 SV=1 - [EIF3F_HUMAN]	357	37.5	0.989	0.904	0.892	0.784	0.856	10	10	27	26	7	26	9.7	26	8.7	25	13.9	26	13.3
O75821	EIF3G	Eukaryotic translation initiation factor 3 subunit G	Eukaryotic translation initiation factor 3 subunit G OS=Homo sapiens GN=EIF3G PE=1 SV=2 - [EIF3G_HUMAN]	320	35.6	0.961	1.054	0.895	0.856	0.969	4	14	34	11	8.9	11	8.8	11	11.4	11	5.8	11	7.9
K7ER90	EIF3G	Eukaryotic translation initiation factor 3 subunit G	Eukaryotic translation initiation factor 3 subunit G (Fragment) OS=Homo sapiens GN=EIF3G PE=3 SV=1 - [K7ER90_HUMAN]	227	25.4	1.014	1.257	1.06	1.037	1.135	1	11	24	1	NaN	1	NaN	1	NaN	1	NaN	1	NaN
O15372	EIF3H	Eukaryotic translation initiation factor 3 subunit H	Eukaryotic translation initiation factor 3 subunit H OS=Homo sapiens GN=EIF3H PE=1 SV=1 - [EIF3H_HUMAN]	352	39.9	1.012	0.96	0.857	0.758	0.965	13	13	32	32	8.1	32	7.2	32	11.1	31	7.9	32	15.6
Q13347	EIF3I	Eukaryotic translation initiation factor 3 subunit I	Eukaryotic translation initiation factor 3 subunit I OS=Homo sapiens GN=EIF3I PE=1 SV=1 - [EIF3I_HUMAN]	325	36.5	0.988	0.999	0.929	0.813	0.926	17	17	35	35	6.2	35	8	35	10.3	35	7.7	35	9.1
O75822	EIF3J	Eukaryotic translation initiation factor 3 subunit J	Eukaryotic translation initiation factor 3 subunit J OS=Homo sapiens GN=EIF3J PE=1 SV=2 - [EIF3J_HUMAN]	258	29	0.995	1.018	1.002	1.052	1.021	11	11	21	20	5.5	21	7.3	21	9.5	21	10.7	21	5
Q9UBQ5	EIF3K	Eukaryotic translation initiation factor 3 subunit K	Eukaryotic translation initiation factor 3 subunit K OS=Homo sapiens GN=EIF3K PE=1 SV=1 - [EIF3K_HUMAN]	218	25	0.932	1.017	0.873	0.786	0.941	8	8	28	28	7	28	6.9	28	13.4	28	9.1	28	9
Q9Y262	EIF3L	Eukaryotic translation initiation factor 3 subunit L	Eukaryotic translation initiation factor 3 subunit L OS=Homo sapiens GN=EIF3L PE=1 SV=1 - [EIF3L_HUMAN]	564	66.7	1.012	0.951	0.878	0.784	0.925	19	19	36	36	8.3	36	10.4	36	8.3	36	11.1	36	7.4
Q7L2H7	EIF3M	Eukaryotic translation initiation factor 3 subunit M	Eukaryotic translation initiation factor 3 subunit M OS=Homo sapiens GN=EIF3M PE=1 SV=1 - [EIF3M_HUMAN]	374	42.5	0.973	0.928	0.818	0.746	0.858	12	12	29	28	10.3	29	6.8	28	22.6	28	12.5	29	10.4
P60842	EIF4A1	Eukaryotic initiation factor 4A-I	Eukaryotic initiation factor 4A-I OS=Homo sapiens GN=EIF4A1 PE=1 SV=1 - [IF4A1_HUMAN]	406	46.1	0.992	1.062	0.883	0.75	0.946	12	22	113	68	8	68	11.7	68	12.4	68	13.1	68	12.1
Q14240	EIF4A2	Eukaryotic initiation factor 4A-II	Eukaryotic initiation factor 4A-II OS=Homo sapiens GN=EIF4A2 PE=1 SV=2 - [IF4A2_HUMAN]	407	46.4	1.008	1.054	1.068	1.107	1.125	6	17	58	19	9.6	19	19	19	16.6	19	24	19	11.1
P38919	EIF4A3	Eukaryotic initiation factor 4A-III	Eukaryotic initiation factor 4A-III OS=Homo sapiens GN=EIF4A3 PE=1 SV=4 - [IF4A3_HUMAN]	411	46.8	1.037	1.005	0.932	0.818	0.916	15	16	52	47	9.1	47	11.4	47	12.2	47	14.1	47	13.1
B4DS13	EIF4B		Eukaryotic translation initiation factor 4B OS=Homo sapiens GN=EIF4B PE=2 SV=1 - [B4DS13_HUMAN]	572	64.8	0.974	0.95	0.808	0.819	0.937	15	15	39	39	8.6	39	11.8	39	15.2	39	15.6	39	9.1
P06730	EIF4E	Eukaryotic translation initiation factor 4E	Eukaryotic translation initiation factor 4E OS=Homo sapiens GN=EIF4E PE=1 SV=2 - [IF4E_HUMAN]	217	25.1	0.978	0.904	0.961	0.903	0.875	7	7	15	15	7.7	15	8.1	15	13.6	15	8.5	15	15.6
B9A044	EIF4E2		Eukaryotic translation initiation factor 4E type 2 OS=Homo sapiens GN=EIF4E2 PE=2 SV=1 - [B9A044_HUMAN]	233	26.8	1.045	0.945	0.939	0.969	0.942	4	4	8	8	7.7	8	12.3	8	9.8	8	11	8	9.3
Q13541	EIF4EBP1	Eukaryotic translation initiation factor 4E-binding protein 1	Eukaryotic translation initiation factor 4E-binding protein 1 OS=Homo sapiens GN=EIF4EBP1 PE=1 SV=3 - [4EBP1_HUMAN]	118	12.6	1.054	0.94	0.739	0.716	0.88	4	4	9	9	7.4	9	9.5	9	14.8	9	12.5	9	11.9
Q13542	EIF4EBP2	Eukaryotic translation initiation factor 4E-binding protein 2	Eukaryotic translation initiation factor 4E-binding protein 2 OS=Homo sapiens GN=EIF4EBP2 PE=1 SV=1 - [4EBP2_HUMAN]	120	12.9	0.883	1.238	0.965	1.258	1.6	2	2	5	5	6.7	5	7.5	5	15.7	5	13.3	5	16.3
B1AKL4	EIF4ENIF1		Eukaryotic translation initiation factor 4E transporter OS=Homo sapiens GN=EIF4ENIF1 PE=2 SV=1 - [B1AKL4_HUMAN]	961	105.5	0.967	1.026	0.876	0.86	1.003	7	7	8	8	10.4	8	9.7	8	19	8	11.2	8	19.1
E7EX73	EIF4G1		Eukaryotic translation initiation factor 4 gamma 1 OS=Homo sapiens GN=EIF4G1 PE=2 SV=1 - [E7EX73_HUMAN]	1436	158.5	0.959	0.966	0.828	0.802	0.854	45	51	124	107	7.4	107	8.5	107	11.3	107	14.1	107	10.8
D3DQV9	EIF4G2		Eukaryotic translation initiation factor 4 gamma 2 (Fragment) OS=Homo sapiens GN=EIF4G2 PE=2 SV=1 - [D3DQV9_HUMAN]	907	102.3	1.015	1.022	0.898	0.854	0.997	30	30	71	68	8	69	12.1	68	14.3	69	16	69	13.3
O43432	EIF4G3	Eukaryotic translation initiation factor 4 gamma 3	Eukaryotic translation initiation factor 4 gamma 3 OS=Homo sapiens GN=EIF4G3 PE=1 SV=2 - [IF4G3_HUMAN]	1585	176.5	0.914	1.014	0.938	0.975	1.138	12	19	32	14	9	14	8.1	14	8.5	14	5.1	14	9.7
B1AN89	EIF4G3		Eukaryotic translation initiation factor 4 gamma 3 OS=Homo sapiens GN=EIF4G3 PE=2 SV=1 - [B1AN89_HUMAN]	630	67.5	0.962	1.007	0.675	0.907	1.268	1	3	3	1	NaN	1	NaN	1	NaN	1	NaN	1	NaN
Q15056	EIF4H	Eukaryotic translation initiation factor 4H	Eukaryotic translation initiation factor 4H OS=Homo sapiens GN=EIF4H PE=1 SV=5 - [IF4H_HUMAN]	248	27.4	1.056	0.98	0.984	0.99	0.932	8	8	19	19	9	19	8.6	19	22.7	19	12.9	19	11.6
P55010	EIF5	Eukaryotic translation initiation factor 5	Eukaryotic translation initiation factor 5 OS=Homo sapiens GN=EIF5 PE=1 SV=2 - [IF5_HUMAN]	431	49.2	0.99	0.879	0.736	0.71	0.768	15	15	44	43	7.3	44	7.2	44	8.4	44	8	44	6.4
P63241	EIF5A	Eukaryotic translation initiation factor 5A-1	Eukaryotic translation initiation factor 5A-1 OS=Homo sapiens GN=EIF5A PE=1 SV=2 - [IF5A1_HUMAN]	154	16.8	0.931	0.915	0.904	0.863	0.884	7	10	69	56	17.1	56	17.5	56	18.1	56	13.2	56	18.8
C9J4W5	EIF5A2		Eukaryotic translation initiation factor 5A-2 (Fragment) OS=Homo sapiens GN=EIF5A2 PE=2 SV=1 - [C9J4W5_HUMAN]	115	12.8	0.927	1.073	1.132	1.231	0.991	1	4	14	1	NaN	1	NaN	1	NaN	1	NaN	1	NaN
O60841	EIF5B	Eukaryotic translation initiation factor 5B	Eukaryotic translation initiation factor 5B OS=Homo sapiens GN=EIF5B PE=1 SV=4 - [IF2P_HUMAN]	1220	138.7	0.975	1.001	0.938	0.886	0.932	40	41	71	69	7.1	69	13.4	69	14.1	69	10.9	69	12
P56537	EIF6	Eukaryotic translation initiation factor 6	Eukaryotic translation initiation factor 6 OS=Homo sapiens GN=EIF6 PE=1 SV=1 - [IF6_HUMAN]	245	26.6	0.996	0.992	0.971	0.945	0.928	8	8	26	25	6.2	25	12.7	25	18.7	24	15.2	25	11.2
Q9BQ52	ELAC2	Zinc phosphodiesterase ELAC protein 2	Zinc phosphodiesterase ELAC protein 2 OS=Homo sapiens GN=ELAC2 PE=1 SV=2 - [RNZ2_HUMAN]	826	92.2	0.961	0.94	0.801	0.728	0.835	22	22	40	40	9.1	40	7.5	40	11.6	40	11	40	8.7
Q15717	ELAVL1	ELAV-like protein 1	ELAV-like protein 1 OS=Homo sapiens GN=ELAVL1 PE=1 SV=2 - [ELAV1_HUMAN]	326	36.1	1.015	0.935	0.873	0.815	0.947	9	9	32	32	6.7	32	5.7	32	8.8	32	8.6	32	6.3
P32519	ELF1	ETS-related transcription factor Elf-1	ETS-related transcription factor Elf-1 OS=Homo sapiens GN=ELF1 PE=1 SV=2 - [ELF1_HUMAN]	619	67.5	1.156	0.912	0.922	0.999	0.915	11	11	16	16	8.7	16	8.8	16	10.5	16	13	16	15.2
P55199	ELL	RNA polymerase II elongation factor ELL	RNA polymerase II elongation factor ELL OS=Homo sapiens GN=ELL PE=1 SV=1 - [ELL_HUMAN]	621	68.2	1.035	0.989	0.853	0.886	0.809	5	5	5	5	6.1	5	7.8	5	4.8	5	1.5	5	7.6
Q92556	ELMO1	Engulfment and cell motility protein 1	Engulfment and cell motility protein 1 OS=Homo sapiens GN=ELMO1 PE=1 SV=2 - [ELMO1_HUMAN]	727	83.8	0.976	1.051	1.104	1.093	1.07	15	18	38	32	6.9	32	7.4	32	9.3	31	10	32	8.1
Q5JVZ5	ELMO2		Engulfment and cell motility protein 2 OS=Homo sapiens GN=ELMO2 PE=2 SV=1 - [Q5JVZ5_HUMAN]	718	82.3	0.994	0.985	1.303	1.823	1.283	13	16	23	18	7.1	18	9.9	18	11.8	18	9.6	18	10.9
D6RBS5	ELMOD2		ELMO domain-containing protein 2 (Fragment) OS=Homo sapiens GN=ELMOD2 PE=2 SV=1 - [D6RBS5_HUMAN]	168	20.2	1.06	1.062	1.128	1.357	1.185	3	3	3	3	7.2	3	11.3	3	10	3	7.4	3	7.1
F6RU81	ELMSAN1		ELM2 and SANT domain-containing protein 1 (Fragment) OS=Homo sapiens GN=ELMSAN1 PE=2 SV=1 - [F6RU81_HUMAN]	1019	111.8	0.869	0.584	0.521	0.513	0.614	3	3	5	5	6.1	5	20	5	20.3	5	16	5	4.4
K7EN05	ELOF1		Transcription elongation factor 1 homolog OS=Homo sapiens GN=ELOF1 PE=4 SV=1 - [K7EN05_HUMAN]	76	8.6	0.947	0.943	0.879	0.829	0.937	1	1	1	1	NaN	1	NaN	1	NaN	1	NaN	1	NaN
Q9BW60	ELOVL1	Elongation of very long chain fatty acids protein 1	Elongation of very long chain fatty acids protein 1 OS=Homo sapiens GN=ELOVL1 PE=1 SV=1 - [ELOV1_HUMAN]	279	32.6	0.938	0.976	1.085	1.226	0.861	2	2	4	3	14.3	3	0.5	3	1.1	3	9.2	3	12.3
Q9GZR5	ELOVL4	Elongation of very long chain fatty acids protein 4	Elongation of very long chain fatty acids protein 4 OS=Homo sapiens GN=ELOVL4 PE=1 SV=1 - [ELOV4_HUMAN]	314	36.8	1.046	1.263	1.413	1.236	1.149	2	2	2	2	9.5	2	0.2	2	0.6	2	6.8	2	9.9
E2QRH7	ELOVL5		Elongation of very long chain fatty acids protein 5 OS=Homo sapiens GN=ELOVL5 PE=2 SV=2 - [E2QRH7_HUMAN]	289	34.2	1.002	1.001	1.044	1.073	1.077	2	2	4	4	5.6	4	8.5	4	27.2	3	10.1	4	13.2
Q6IA86	ELP2	Elongator complex protein 2	Elongator complex protein 2 OS=Homo sapiens GN=ELP2 PE=1 SV=2 - [ELP2_HUMAN]	826	92.4	1.004	0.957	0.919	0.826	0.958	19	19	29	27	10.8	27	11.8	27	9.4	27	14.4	27	10.2
Q9H9T3	ELP3	Elongator complex protein 3	Elongator complex protein 3 OS=Homo sapiens GN=ELP3 PE=1 SV=2 - [ELP3_HUMAN]	547	62.2	0.98	0.923	0.964	0.774	0.921	14	14	24	24	7.3	24	8.5	24	9.2	24	13.9	24	6.7
Q96EB1	ELP4	Elongator complex protein 4	Elongator complex protein 4 OS=Homo sapiens GN=ELP4 PE=1 SV=2 - [ELP4_HUMAN]	424	46.6	0.986	1.035	0.997	0.954	1.021	7	7	12	12	6.7	12	13.8	12	17	12	11.3	12	10.6
I3L1Q3	ELP5		Elongator complex protein 5 (Fragment) OS=Homo sapiens GN=ELP5 PE=4 SV=1 - [I3L1Q3_HUMAN]	262	28.8	1.004	0.915	0.873	0.881	0.93	4	4	6	6	10.5	6	5.9	6	10.2	6	8.2	6	8.7
Q0PNE2	ELP6	Elongator complex protein 6	Elongator complex protein 6 OS=Homo sapiens GN=ELP6 PE=1 SV=1 - [ELP6_HUMAN]	266	29.8	1.091	0.978	0.997	0.942	0.984	4	4	5	5	11.2	5	12.2	5	12.1	5	13.1	5	13.2
B7Z902	EMB		Embigin OS=Homo sapiens GN=EMB PE=2 SV=1 - [B7Z902_HUMAN]	277	31.6	1.076	1.07	0.907	0.976	0.996	8	8	9	9	8	9	5.2	9	6	9	18.4	9	7.3
Q8N766	EMC1	ER membrane protein complex subunit 1	ER membrane protein complex subunit 1 OS=Homo sapiens GN=EMC1 PE=1 SV=1 - [EMC1_HUMAN]	993	111.7	0.995	1.097	1.025	1.041	1.099	15	15	18	17	4.8	18	3.9	18	13.1	18	14.2	18	12.5
Q5UCC4	EMC10	ER membrane protein complex subunit 10	ER membrane protein complex subunit 10 OS=Homo sapiens GN=EMC10 PE=1 SV=1 - [EMC10_HUMAN]	262	27.3	0.945	1.309	1.113	1.338	1.542	1	1	2	2	21.9	2	16.9	2	28.3	2	7.1	2	3
Q15006	EMC2	ER membrane protein complex subunit 2	ER membrane protein complex subunit 2 OS=Homo sapiens GN=EMC2 PE=1 SV=1 - [EMC2_HUMAN]	297	34.8	0.985	1.108	1.293	1.113	1.134	6	6	7	7	18.6	7	15.3	7	8.5	7	7.8	7	9
C9JLM9	EMC3		ER membrane protein complex subunit 3 OS=Homo sapiens GN=EMC3 PE=2 SV=1 - [C9JLM9_HUMAN]	203	23.1	1.109	1.227	1.235	1.515	0.918	1	1	1	1	NaN	1	NaN	1	NaN	1	NaN	1	NaN
Q5J8M3	EMC4	ER membrane protein complex subunit 4	ER membrane protein complex subunit 4 OS=Homo sapiens GN=EMC4 PE=1 SV=2 - [EMC4_HUMAN]	183	20.1	0.997	1.181	1.101	1.123	1.133	2	2	2	2	11.3	2	12.7	2	12.1	2	1.3	2	26.4
Q9BV81	EMC6	ER membrane protein complex subunit 6	ER membrane protein complex subunit 6 OS=Homo sapiens GN=EMC6 PE=1 SV=1 - [EMC6_HUMAN]	110	12	0.835	1.034	0.814	1.192	0.909	1	1	1	1	NaN	1	NaN	1	NaN	1	NaN	1	NaN
Q9NPA0	EMC7	ER membrane protein complex subunit 7	ER membrane protein complex subunit 7 OS=Homo sapiens GN=EMC7 PE=1 SV=1 - [EMC7_HUMAN]	242	26.5	1.017	1.187	1.04	1.049	1.01	3	3	4	4	9.3	4	6.5	4	7.9	4	12.3	4	5.7
O43402	EMC8	ER membrane protein complex subunit 8	ER membrane protein complex subunit 8 OS=Homo sapiens GN=EMC8 PE=1 SV=1 - [EMC8_HUMAN]	210	23.8	0.955	1	1.03	1.014	1.038	5	5	9	9	15	9	18	9	16.4	9	13.1	9	8.9
P50402	EMD	Emerin	Emerin OS=Homo sapiens GN=EMD PE=1 SV=1 - [EMD_HUMAN]	254	29	1.019	0.99	0.884	0.892	0.86	9	9	13	13	4.7	13	10.1	13	9	13	5.2	13	5.2
Q92979	EMG1	Ribosomal RNA small subunit methyltransferase NEP1	Ribosomal RNA small subunit methyltransferase NEP1 OS=Homo sapiens GN=EMG1 PE=1 SV=4 - [NEP1_HUMAN]	244	26.7	1.001	0.932	0.664	0.546	0.645	10	10	16	16	7.1	16	5.7	16	7.6	16	12.2	16	6.6
O95834	EML2	Echinoderm microtubule-associated protein-like 2	Echinoderm microtubule-associated protein-like 2 OS=Homo sapiens GN=EML2 PE=2 SV=1 - [EMAL2_HUMAN]	649	70.6	1.027	0.84	0.893	0.998	0.721	6	6	7	7	22.2	7	9	7	8.4	7	16	7	3.7
Q32P44	EML3	Echinoderm microtubule-associated protein-like 3	Echinoderm microtubule-associated protein-like 3 OS=Homo sapiens GN=EML3 PE=1 SV=1 - [EMAL3_HUMAN]	896	95.1	0.986	1.099	1.309	1.39	1.34	9	9	10	10	10.1	10	11.6	10	27.8	10	14.1	10	14.3
Q9HC35	EML4	Echinoderm microtubule-associated protein-like 4	Echinoderm microtubule-associated protein-like 4 OS=Homo sapiens GN=EML4 PE=1 SV=3 - [EMAL4_HUMAN]	981	108.8	0.991	1.072	1.073	1.076	1.092	21	21	27	27	9.5	27	8.7	27	11.3	27	11.3	27	11
O94919	ENDOD1	Endonuclease domain-containing 1 protein	Endonuclease domain-containing 1 protein OS=Homo sapiens GN=ENDOD1 PE=1 SV=2 - [ENDD1_HUMAN]	500	55	1.001	0.888	0.76	0.741	0.738	10	10	25	25	6.7	25	6.4	25	10.2	25	8.7	25	13.9
Q14249	ENDOG	Endonuclease G, mitochondrial	Endonuclease G, mitochondrial OS=Homo sapiens GN=ENDOG PE=1 SV=4 - [NUCG_HUMAN]	297	32.6	0.757	1.313	1.006	0.808	1.352	1	1	1	1	NaN	1	NaN	1	NaN	1	NaN	1	NaN
Q9H0I2	ENKD1	Enkurin domain-containing protein 1	Enkurin domain-containing protein 1 OS=Homo sapiens GN=ENKD1 PE=2 SV=1 - [ENKD1_HUMAN]	346	38.7	0.875	1.119	1.205	1.257	1.143	1	1	1	1	NaN	1	NaN	1	NaN	1	NaN	1	NaN
P06733	ENO1	Alpha-enolase	Alpha-enolase OS=Homo sapiens GN=ENO1 PE=1 SV=2 - [ENOA_HUMAN]	434	47.1	1.044	0.844	0.801	0.832	0.705	26	30	1014	724	6.1	726	12.1	725	11.6	727	13.2	727	24.2
P09104	ENO2	Gamma-enolase	Gamma-enolase OS=Homo sapiens GN=ENO2 PE=1 SV=3 - [ENOG_HUMAN]	434	47.2	1.042	0.865	0.982	1.047	0.841	15	19	219	62	8.8	62	10.3	62	14.1	62	9.3	62	15.6
P13929	ENO3	Beta-enolase	Beta-enolase OS=Homo sapiens GN=ENO3 PE=1 SV=5 - [ENOB_HUMAN]	434	47	1.034	0.765	0.852	0.788	0.588	3	8	243	9	5.7	9	7.5	9	14	9	13.4	9	14.5
Q9UHY7	ENOPH1	Enolase-phosphatase E1	Enolase-phosphatase E1 OS=Homo sapiens GN=ENOPH1 PE=1 SV=1 - [ENOPH_HUMAN]	261	28.9	1.056	0.992	1.097	1.032	1.009	7	7	19	19	9.9	19	11.8	19	10.4	19	16.3	19	8.4
B3KSL6	ENOSF1		Mitochondrial enolase superfamily member 1 OS=Homo sapiens GN=ENOSF1 PE=2 SV=1 - [B3KSL6_HUMAN]	213	24.3	1.054	0.946	1.123	0.939	1.02	2	2	3	3	2.1	3	6.2	3	0.1	3	1.5	3	0.1
Q9Y6X5	ENPP4	Bis(5'-adenosyl)-triphosphatase ENPP4	Bis(5'-adenosyl)-triphosphatase ENPP4 OS=Homo sapiens GN=ENPP4 PE=1 SV=3 - [ENPP4_HUMAN]	453	51.6	0.998	1.155	1.306	1.448	1.225	5	5	7	7	15	7	6.6	7	8.6	7	13.6	7	8
O43768	ENSA	Alpha-endosulfine	Alpha-endosulfine OS=Homo sapiens GN=ENSA PE=1 SV=1 - [ENSA_HUMAN]	121	13.4	1.01	0.991	0.847	0.978	1.05	7	8	12	11	8	11	11.8	11	8.3	11	20.3	11	8.4
H0YIV9	ENSG00000111780		Uncharacterized protein (Fragment) OS=Homo sapiens PE=3 SV=1 - [H0YIV9_HUMAN]	168	18.7	0.974	1.134	1.049	1.063	1.141	5	5	7	6	3.1	6	14.1	6	4.2	6	10.3	6	8.7
I3L097	ENSG00000188971		Uncharacterized protein OS=Homo sapiens PE=4 SV=1 - [I3L097_HUMAN]	355	37.9	0.978	1.214	1.355	1.606	1.577	3	3	4	4	10.7	4	28.5	4	10.4	4	14.6	4	22.3
C9JYP6	ENSG00000229729		Uncharacterized protein OS=Homo sapiens PE=4 SV=1 - [C9JYP6_HUMAN]	358	40.6	0.969	1.217	1.105	1.193	0.972	3	3	4	4	11.5	4	12.9	4	14.2	4	8.2	4	7.7
H0YBP7	ENSG00000248235		Uncharacterized protein (Fragment) OS=Homo sapiens PE=4 SV=1 - [H0YBP7_HUMAN]	141	15.3	1.013	1.484	1.189	1.111	1.336	2	2	2	2	3.1	2	2.6	2	5.1	2	7.7	2	4
H7C1Q1	ENSG00000248751		Uncharacterized protein (Fragment) OS=Homo sapiens PE=2 SV=1 - [H7C1Q1_HUMAN]	480	54.2	0.951	0.834	0.752	0.795	0.707	1	5	5	1	NaN	1	NaN	1	NaN	1	NaN	1	NaN
E9PLD3	ENSG00000255432		Uncharacterized protein OS=Homo sapiens PE=4 SV=1 - [E9PLD3_HUMAN]	99	11.6	0.913	1.109	1.174	1.151	1.213	1	2	2	1	NaN	1	NaN	1	NaN	1	NaN	1	NaN
I3L3B4	ENSG00000255439		Uncharacterized protein (Fragment) OS=Homo sapiens PE=2 SV=1 - [I3L3B4_HUMAN]	104	11.1	1.084	0.959	1.031	1.118	1.02	1	1	3	3	5.7	3	5.4	3	4.6	3	11.4	3	6.9
C9JNC2	ENSG00000257743		Uncharacterized protein OS=Homo sapiens PE=2 SV=3 - [C9JNC2_HUMAN]	2515	277.8	0.952	1.025	0.894	0.995	1.067	1	1	1	1	NaN	1	NaN	1	NaN	1	NaN	1	NaN
H3BQF6	ENSG00000258539		Uncharacterized protein (Fragment) OS=Homo sapiens PE=4 SV=1 - [H3BQF6_HUMAN]	201	22.7	0.862	0.915	0.952	0.723	0.774	1	1	1	1	NaN	1	NaN	1	NaN	1	NaN	1	NaN
K7EQS6	ENSG00000267001		Uncharacterized protein (Fragment) OS=Homo sapiens PE=4 SV=1 - [K7EQS6_HUMAN]	105	11.2	0.864	0.908	0.525	0.542	0.748	1	1	1	1	NaN	1	NaN	1	NaN	1	NaN	1	NaN
I3L4S7	ENTHD2		AP-4 complex accessory subunit tepsin (Fragment) OS=Homo sapiens GN=ENTHD2 PE=2 SV=1 - [I3L4S7_HUMAN]	114	12.4	0.833	1.076	1.102	1.217	1.04	1	1	1	1	NaN	1	NaN	1	NaN	1	NaN	1	NaN
P10009	env_egfp		OS=Human immunodeficiency virus type 1 NL4-3 GN=env_egfp PE=1 SV=1 288 bp - [dENV_EGFP_HV1MA]	288	32.8	0.987	6.187	46.985	69.136	0.476	8	8	18	16	26.8	18	314.2	18	115	18	58.4	7	105.7
Q9NPA8	ENY2	Enhancer of yellow 2 transcription factor homolog	Transcription and mRNA export factor ENY2 OS=Homo sapiens GN=ENY2 PE=1 SV=1 - [ENY2_HUMAN]	101	11.5	0.946	1.047	0.938	0.784	1.031	3	3	5	5	0.9	5	11.9	5	14.2	5	6.4	5	4.1
Q09472	EP300	Histone acetyltransferase p300	Histone acetyltransferase p300 OS=Homo sapiens GN=EP300 PE=1 SV=2 - [EP300_HUMAN]	2414	264	0.993	0.937	0.961	0.948	0.923	1	4	5	1	NaN	1	NaN	1	NaN	1	NaN	1	NaN
Q96L91	EP400	E1A-binding protein p400	E1A-binding protein p400 OS=Homo sapiens GN=EP400 PE=1 SV=4 - [EP400_HUMAN]	3159	343.3	0.992	1.082	0.945	0.908	1.019	14	14	18	18	9.6	18	10.7	18	7.4	18	13.4	18	5.1
P11171	EPB41	Protein 4.1	Protein 4.1 OS=Homo sapiens GN=EPB41 PE=1 SV=4 - [41_HUMAN]	864	97	0.95	1.113	1.036	1.024	1.253	15	16	24	22	8.2	22	10.9	22	14.4	22	8.5	22	12.9
Q9H4G0	EPB41L1	Band 4.1-like protein 1	Band 4.1-like protein 1 OS=Homo sapiens GN=EPB41L1 PE=1 SV=2 - [E41L1_HUMAN]	881	98.4	1.125	1.064	0.832	0.786	0.959	1	3	6	1	NaN	1	NaN	1	NaN	1	NaN	1	NaN
O43491	EPB41L2	Band 4.1-like protein 2	Band 4.1-like protein 2 OS=Homo sapiens GN=EPB41L2 PE=1 SV=1 - [E41L2_HUMAN]	1005	112.5	0.936	1	1.049	1.149	2.049	1	36	83	1	NaN	1	NaN	1	NaN	1	NaN	1	NaN
E9PHY5	EPB41L2		Band 4.1-like protein 2 OS=Homo sapiens GN=EPB41L2 PE=2 SV=1 - [E9PHY5_HUMAN]	935	104.3	0.99	1.076	0.872	0.9	1.058	1	36	83	1	NaN	1	NaN	1	NaN	1	NaN	1	NaN
Q9H2F5	EPC1	Enhancer of polycomb homolog 1	Enhancer of polycomb homolog 1 OS=Homo sapiens GN=EPC1 PE=1 SV=1 - [EPC1_HUMAN]	836	93.4	0.918	1.009	0.647	0.757	0.898	2	2	2	2	31.3	2	35.1	2	3.1	2	22.2	2	1.2
C9J1X4	EPC2		Enhancer of polycomb homolog 2 (Fragment) OS=Homo sapiens GN=EPC2 PE=2 SV=1 - [C9J1X4_HUMAN]	160	19.2	1.319	1.106	0.965	1.012	1.288	1	1	1	1	NaN	1	NaN	1	NaN	1	NaN	1	NaN
Q9UM22	EPDR1	Mammalian ependymin-related protein 1	Mammalian ependymin-related protein 1 OS=Homo sapiens GN=EPDR1 PE=1 SV=2 - [EPDR1_HUMAN]	224	25.4	1.073	1.038	1.199	1.292	1.156	3	3	6	6	3.4	6	12.2	6	6.2	6	3.9	6	9.8
Q9HCE0	EPG5	Ectopic P granules protein 5 homolog	Ectopic P granules protein 5 homolog OS=Homo sapiens GN=EPG5 PE=2 SV=2 - [EPG5_HUMAN]	2579	292.3	1.059	1.136	1.211	1.326	1.269	1	1	1	1	NaN	1	NaN	1	NaN	1	NaN	1	NaN
B1AQP8	EPHX1		Epoxide hydrolase 1 (Fragment) OS=Homo sapiens GN=EPHX1 PE=2 SV=1 - [B1AQP8_HUMAN]	136	16.4	0.939	1.431	1.609	1.727	1.581	1	1	1	1	NaN	1	NaN	1	NaN	1	NaN	1	NaN
Q7L775	EPM2AIP1	EPM2A-interacting protein 1	EPM2A-interacting protein 1 OS=Homo sapiens GN=EPM2AIP1 PE=1 SV=1 - [EPMIP_HUMAN]	607	70.3	1.096	1.324	1.602	1.696	1.664	6	6	7	7	5.3	7	26.8	7	28.5	7	19.2	7	16.1
Q9Y6I3	EPN1	Epsin-1	Epsin-1 OS=Homo sapiens GN=EPN1 PE=1 SV=2 - [EPN1_HUMAN]	576	60.3	0.996	0.909	1.012	1.244	1.285	4	4	4	4	2.2	4	5.9	4	12.2	4	15.3	4	12.6
P07814	EPRS	Bifunctional glutamate/proline--tRNA ligase;Glutamate--tRNA ligase;Proline--tRNA ligase	Bifunctional glutamate/proline--tRNA ligase OS=Homo sapiens GN=EPRS PE=1 SV=5 - [SYEP_HUMAN]	1512	170.5	1.019	0.962	0.956	0.96	0.883	57	58	139	135	7	134	9.3	135	11.5	134	10.6	135	11.7
P42566	EPS15	Epidermal growth factor receptor substrate 15	Epidermal growth factor receptor substrate 15 OS=Homo sapiens GN=EPS15 PE=1 SV=2 - [EPS15_HUMAN]	896	98.6	0.985	0.954	1.018	1.145	1	21	21	28	28	9	28	8.9	28	7.2	28	6.1	28	10.8
Q9UBC2	EPS15L1	Epidermal growth factor receptor substrate 15-like 1	Epidermal growth factor receptor substrate 15-like 1 OS=Homo sapiens GN=EPS15L1 PE=1 SV=1 - [EP15R_HUMAN]	864	94.2	0.977	1.002	1.03	1.193	1.052	18	18	25	25	8	25	7.2	25	5.9	25	7	25	11.4
Q9H6S3	EPS8L2	Epidermal growth factor receptor kinase substrate 8-like protein 2	Epidermal growth factor receptor kinase substrate 8-like protein 2 OS=Homo sapiens GN=EPS8L2 PE=1 SV=2 - [ES8L2_HUMAN]	715	80.6	0.895	0.924	0.56	0.573	0.808	2	2	2	2	11.8	2	18.8	2	68.9	2	58	2	25.3
O75616	ERAL1	GTPase Era, mitochondrial	GTPase Era, mitochondrial OS=Homo sapiens GN=ERAL1 PE=1 SV=2 - [ERAL1_HUMAN]	437	48.3	0.991	1.102	0.761	0.7	0.848	6	6	9	9	5.4	9	6.8	9	7.6	9	17	9	6.4
Q9NZ08	ERAP1	Endoplasmic reticulum aminopeptidase 1	Endoplasmic reticulum aminopeptidase 1 OS=Homo sapiens GN=ERAP1 PE=1 SV=3 - [ERAP1_HUMAN]	941	107.2	0.976	1.301	1.836	2.13	1.998	27	27	56	56	6.3	56	7.4	56	9.6	55	8.7	56	8.1
Q6P179	ERAP2	Endoplasmic reticulum aminopeptidase 2	Endoplasmic reticulum aminopeptidase 2 OS=Homo sapiens GN=ERAP2 PE=1 SV=2 - [ERAP2_HUMAN]	960	110.4	1.003	1.281	1.683	1.805	1.648	23	23	34	34	7.3	34	11.8	34	17.1	34	10.8	34	13.5
Q96RT1	ERBB2IP	Protein LAP2	Protein LAP2 OS=Homo sapiens GN=ERBB2IP PE=1 SV=2 - [LAP2_HUMAN]	1412	158.2	0.952	1.15	1.036	1.033	1.333	9	9	11	11	10.6	11	8.9	11	10	11	12.6	11	7.6
G8JLD3	ERC1		ELKS/Rab6-interacting/CAST family member 1 OS=Homo sapiens GN=ERC1 PE=2 SV=1 - [G8JLD3_HUMAN]	1086	124.7	1	1.151	1.194	1.293	1.169	13	15	16	14	15.4	14	11.5	14	15.2	14	14.8	14	6.8
P07992	ERCC1	DNA excision repair protein ERCC-1	DNA excision repair protein ERCC-1 OS=Homo sapiens GN=ERCC1 PE=1 SV=1 - [ERCC1_HUMAN]	297	32.5	0.939	1.013	1.004	0.948	0.98	3	3	3	3	1	3	5.3	3	1.1	3	8.3	3	1
P18074	ERCC2	TFIIH basal transcription factor complex helicase XPD subunit	TFIIH basal transcription factor complex helicase XPD subunit OS=Homo sapiens GN=ERCC2 PE=1 SV=1 - [ERCC2_HUMAN]	760	86.9	1.047	1.132	1.232	1.2	1.085	9	9	11	9	9.6	9	14.2	9	14.4	9	17.9	9	6.2
G3V1S1	ERCC3		Excision repair cross-complementing rodent repair deficiency, complementation group 3 (Xeroderma pigmentosum group B complementing), isoform CRA_b OS=Homo sapiens GN=ERCC3 PE=2 SV=1 - [G3V1S1_HUMAN]	718	81.9	0.928	1.002	0.937	0.968	0.964	6	6	7	7	7.9	7	4.2	7	10.1	7	9.1	7	10.6
Q92889	ERCC4	DNA repair endonuclease XPF	DNA repair endonuclease XPF OS=Homo sapiens GN=ERCC4 PE=1 SV=3 - [XPF_HUMAN]	916	104.4	0.984	1.065	1.046	1.152	1.098	6	6	8	8	6.3	8	8.5	8	17.2	8	12.7	8	10.7
P28715	ERCC5	DNA repair protein complementing XP-G cells	DNA repair protein complementing XP-G cells OS=Homo sapiens GN=ERCC5 PE=1 SV=3 - [ERCC5_HUMAN]	1186	133	1.079	1.073	1.203	1.142	1.049	4	4	4	4	4.2	4	2.4	4	8	4	5.6	4	9.6
Q2NKX8	ERCC6L	DNA excision repair protein ERCC-6-like	DNA excision repair protein ERCC-6-like OS=Homo sapiens GN=ERCC6L PE=1 SV=1 - [ERC6L_HUMAN]	1250	141	0.983	0.968	0.902	0.733	0.998	28	28	35	35	10.9	35	11.8	35	14.3	35	22	35	12.3
Q969X5	ERGIC1	Endoplasmic reticulum-Golgi intermediate compartment protein 1	Endoplasmic reticulum-Golgi intermediate compartment protein 1 OS=Homo sapiens GN=ERGIC1 PE=1 SV=1 - [ERGI1_HUMAN]	290	32.6	1.03	0.923	0.908	0.998	0.876	7	7	16	16	5.7	16	13.6	16	9.4	16	9.5	16	14.6
Q96RQ1	ERGIC2	Endoplasmic reticulum-Golgi intermediate compartment protein 2	Endoplasmic reticulum-Golgi intermediate compartment protein 2 OS=Homo sapiens GN=ERGIC2 PE=1 SV=2 - [ERGI2_HUMAN]	377	42.5	1.024	1.083	1.058	1.076	1.009	4	4	6	6	9.8	6	17	6	28	6	15.6	6	10.4
Q9Y282	ERGIC3	Endoplasmic reticulum-Golgi intermediate compartment protein 3	Endoplasmic reticulum-Golgi intermediate compartment protein 3 OS=Homo sapiens GN=ERGIC3 PE=1 SV=1 - [ERGI3_HUMAN]	383	43.2	0.94	0.996	0.936	0.977	0.911	8	8	12	12	7.6	12	11.4	12	5.9	12	5.6	12	4.5
P84090	ERH	Enhancer of rudimentary homolog	Enhancer of rudimentary homolog OS=Homo sapiens GN=ERH PE=1 SV=1 - [ERH_HUMAN]	104	12.3	1.025	1.038	1.036	0.979	0.977	3	3	12	12	2.5	12	4.1	12	4.1	12	5.1	12	6.9
Q8IV48	ERI1	3'-5' exoribonuclease 1	3'-5' exoribonuclease 1 OS=Homo sapiens GN=ERI1 PE=1 SV=3 - [ERI1_HUMAN]	349	40	0.993	0.804	0.659	0.636	0.747	7	7	9	8	3	9	4.5	9	8.8	9	8.2	9	3.4
E5RHA3	ERICH1		Glutamate-rich protein 1 OS=Homo sapiens GN=ERICH1 PE=2 SV=1 - [E5RHA3_HUMAN]	345	38.3	0.936	0.774	0.674	0.73	0.937	3	3	4	4	8.6	4	7.6	4	21.8	4	27.5	4	14.9
Q96DZ1	ERLEC1	Endoplasmic reticulum lectin 1	Endoplasmic reticulum lectin 1 OS=Homo sapiens GN=ERLEC1 PE=1 SV=1 - [ERLEC_HUMAN]	483	54.8	0.996	1.005	1.084	1.247	0.973	8	9	14	13	8.9	13	7	13	14.9	13	10.5	13	11.2
O75477	ERLIN1	Erlin-1	Erlin-1 OS=Homo sapiens GN=ERLIN1 PE=1 SV=1 - [ERLN1_HUMAN]	346	38.9	0.991	0.979	0.962	0.946	0.924	5	7	10	6	4.7	6	3.8	6	2.4	6	9	6	4.3
O94905	ERLIN2	Erlin-2	Erlin-2 OS=Homo sapiens GN=ERLIN2 PE=1 SV=1 - [ERLN2_HUMAN]	339	37.8	1.009	1.043	1.125	1.244	1.106	10	12	25	21	3.9	21	5.3	21	2.8	21	7.8	21	5.4
E7ER77	ERMP1		Endoplasmic reticulum metallopeptidase 1 OS=Homo sapiens GN=ERMP1 PE=2 SV=1 - [E7ER77_HUMAN]	841	93.1	1.037	1.005	1.121	1.276	1.13	2	2	3	3	0.6	3	0.6	3	12.5	3	5.6	3	23.2
Q96HE7	ERO1L	ERO1-like protein alpha	ERO1-like protein alpha OS=Homo sapiens GN=ERO1L PE=1 SV=2 - [ERO1A_HUMAN]	468	54.4	1.053	0.977	1.061	1.075	0.979	20	20	51	51	7.9	51	12.4	51	16.1	51	17	51	14.1
P30040	ERP29	Endoplasmic reticulum resident protein 29	Endoplasmic reticulum resident protein 29 OS=Homo sapiens GN=ERP29 PE=1 SV=4 - [ERP29_HUMAN]	261	29	1.022	0.966	1.133	1.196	0.999	11	11	49	48	10.3	48	7.8	48	16.5	48	10.3	48	12.6
Q9BS26	ERP44	Endoplasmic reticulum resident protein 44	Endoplasmic reticulum resident protein 44 OS=Homo sapiens GN=ERP44 PE=1 SV=1 - [ERP44_HUMAN]	406	46.9	0.774	0.913	1.158	1.346	1.055	10	11	17	15	3.4	15	5.9	15	8.4	15	7.8	15	10
Q9UJM3	ERRFI1	ERBB receptor feedback inhibitor 1	ERBB receptor feedback inhibitor 1 OS=Homo sapiens GN=ERRFI1 PE=1 SV=1 - [ERRFI_HUMAN]	462	50.5	0.987	1.165	1.135	1.173	1.227	1	1	1	1	NaN	1	NaN	1	NaN	1	NaN	1	NaN
P10768	ESD	S-formylglutathione hydrolase	S-formylglutathione hydrolase OS=Homo sapiens GN=ESD PE=1 SV=2 - [ESTD_HUMAN]	282	31.4	1.009	0.975	1.121	1.116	0.886	10	10	48	48	10	48	18	48	16.5	48	14.6	48	12.3
Q9H501	ESF1	ESF1 homolog	ESF1 homolog OS=Homo sapiens GN=ESF1 PE=1 SV=1 - [ESF1_HUMAN]	851	98.7	0.967	0.995	0.797	0.625	0.84	17	17	21	21	9.1	21	10.5	21	14.3	21	20.5	21	12.9
Q14674	ESPL1	Separin	Separin OS=Homo sapiens GN=ESPL1 PE=1 SV=3 - [ESPL1_HUMAN]	2120	233	1.143	2.52	2.736	2.493	1.428	1	1	1	1	NaN	1	NaN	1	NaN	1	NaN	1	NaN
Q9BSJ8	ESYT1	Extended synaptotagmin-1	Extended synaptotagmin-1 OS=Homo sapiens GN=ESYT1 PE=1 SV=1 - [ESYT1_HUMAN]	1104	122.8	1.011	1.012	1.092	1.11	1.002	29	29	64	64	8.6	63	10.1	64	11.4	63	10.7	64	10.1
H7BXI1	ESYT2		Extended synaptotagmin-2 (Fragment) OS=Homo sapiens GN=ESYT2 PE=2 SV=1 - [H7BXI1_HUMAN]	884	97.9	1.037	0.969	1.146	1.241	1.003	19	19	39	39	11.4	39	12.5	39	11.3	39	20.1	39	15.3
P62495	ETF1	Eukaryotic peptide chain release factor subunit 1	Eukaryotic peptide chain release factor subunit 1 OS=Homo sapiens GN=ETF1 PE=1 SV=3 - [ERF1_HUMAN]	437	49	1.013	0.923	0.963	0.915	0.905	19	19	42	42	6.2	42	7.4	42	13	42	9.1	42	11.1
P13804	ETFA	Electron transfer flavoprotein subunit alpha, mitochondrial	Electron transfer flavoprotein subunit alpha, mitochondrial OS=Homo sapiens GN=ETFA PE=1 SV=1 - [ETFA_HUMAN]	333	35.1	1.048	0.918	1.059	1.127	0.888	11	11	35	35	6	35	6.7	35	7.3	35	8.6	35	8.8
P38117	ETFB	Electron transfer flavoprotein subunit beta	Electron transfer flavoprotein subunit beta OS=Homo sapiens GN=ETFB PE=1 SV=3 - [ETFB_HUMAN]	255	27.8	1.016	0.974	1.149	1.261	0.942	14	14	31	29	9.3	29	7.2	29	7.7	29	10.6	29	8.4
J3KND9	ETFDH		Electron transfer flavoprotein-ubiquinone oxidoreductase, mitochondrial OS=Homo sapiens GN=ETFDH PE=4 SV=1 - [J3KND9_HUMAN]	570	62.8	1.022	1.047	1.237	1.352	1.125	12	12	15	15	9.7	15	9	15	13.5	15	9.8	15	10.4
O95571	ETHE1	Protein ETHE1, mitochondrial	Persulfide dioxygenase ETHE1, mitochondrial OS=Homo sapiens GN=ETHE1 PE=1 SV=2 - [ETHE1_HUMAN]	254	27.9	0.98	1.079	1.271	1.353	1.211	9	9	11	11	9.6	11	8.4	11	13.4	11	12.7	11	6.2
H0YH69	ETNK1		Ethanolamine kinase 1 (Fragment) OS=Homo sapiens GN=ETNK1 PE=4 SV=1 - [H0YH69_HUMAN]	425	47.7	0.697	1.291	1.091	1.036	1.114	8	8	9	9	9.8	9	9	9	13.1	9	13.3	9	10.1
P14921	ETS1	Protein C-ets-1	Protein C-ets-1 OS=Homo sapiens GN=ETS1 PE=1 SV=1 - [ETS1_HUMAN]	441	50.4	0.788	0.773	0.498	0.584	0.853	5	5	7	6	4.1	6	8.6	6	5.3	6	8.3	6	5.2
P41162	ETV3	ETS translocation variant 3	ETS translocation variant 3 OS=Homo sapiens GN=ETV3 PE=1 SV=2 - [ETV3_HUMAN]	512	57	0.677	0.618	0.813	0.789	0.607	1	1	1	1	NaN	1	NaN	1	NaN	1	NaN	1	NaN
P41212	ETV6	Transcription factor ETV6	Transcription factor ETV6 OS=Homo sapiens GN=ETV6 PE=1 SV=1 - [ETV6_HUMAN]	452	53	0.948	1.097	0.98	0.909	1.003	7	7	9	9	4	9	8.3	9	13.6	9	2.4	9	11.3
Q96CN4	EVI5L	EVI5-like protein	EVI5-like protein OS=Homo sapiens GN=EVI5L PE=1 SV=1 - [EVI5L_HUMAN]	794	91.3	1.073	0.976	1.368	1.64	1.387	2	2	2	2	21.2	2	33.3	2	28.5	2	40.3	2	28.4
Q9UI08	EVL	Ena/VASP-like protein	Ena/VASP-like protein OS=Homo sapiens GN=EVL PE=1 SV=2 - [EVL_HUMAN]	416	44.6	1.031	1.118	1.139	1.139	1.256	12	12	22	22	11.2	22	10.6	22	10.9	22	9.7	22	5.3
B0QYK0	EWSR1		RNA-binding protein EWS OS=Homo sapiens GN=EWSR1 PE=2 SV=1 - [B0QYK0_HUMAN]	618	64.9	0.987	0.966	0.861	0.91	0.928	2	7	27	10	7.8	10	7.7	10	6	10	5.2	10	12
H7BY36	EWSR1		RNA-binding protein EWS (Fragment) OS=Homo sapiens GN=EWSR1 PE=4 SV=1 - [H7BY36_HUMAN]	308	32.2	0.91	1.096	0.794	0.681	0.944	1	6	18	1	NaN	1	NaN	1	NaN	1	NaN	1	NaN
C9JLF4	EXD2		Exonuclease 3'-5' domain-containing protein 2 (Fragment) OS=Homo sapiens GN=EXD2 PE=2 SV=1 - [C9JLF4_HUMAN]	114	12.4	1.023	0.982	0.947	0.887	1.213	2	2	3	3	1.5	3	0.7	3	2.6	3	1.5	3	2.5
Q9NV70	EXOC1	Exocyst complex component 1	Exocyst complex component 1 OS=Homo sapiens GN=EXOC1 PE=1 SV=4 - [EXOC1_HUMAN]	894	101.9	1.021	1.026	1.116	1.172	1.044	16	16	18	18	6	18	7.4	18	6.7	18	9.1	18	12.6
Q96KP1	EXOC2	Exocyst complex component 2	Exocyst complex component 2 OS=Homo sapiens GN=EXOC2 PE=1 SV=1 - [EXOC2_HUMAN]	924	104	0.966	0.988	1.009	1.077	1.044	20	20	25	25	12.1	25	9	25	8.4	25	9.6	25	13.9
O60645	EXOC3	Exocyst complex component 3	Exocyst complex component 3 OS=Homo sapiens GN=EXOC3 PE=1 SV=2 - [EXOC3_HUMAN]	756	86.8	1.012	0.958	1.058	1.089	1.073	15	15	20	20	4.7	20	7.1	20	10.3	20	9.9	20	7.8
Q96A65	EXOC4	Exocyst complex component 4	Exocyst complex component 4 OS=Homo sapiens GN=EXOC4 PE=1 SV=1 - [EXOC4_HUMAN]	974	110.4	0.99	0.984	1.12	1.123	1.037	11	20	22	12	6.2	12	5.9	12	10.7	12	13.6	12	13.4
F5GZT1	EXOC4		Exocyst complex component 4 OS=Homo sapiens GN=EXOC4 PE=2 SV=1 - [F5GZT1_HUMAN]	584	65.9	0.944	0.957	0.859	0.849	0.832	1	10	11	1	NaN	1	NaN	1	NaN	1	NaN	1	NaN
O00471	EXOC5	Exocyst complex component 5	Exocyst complex component 5 OS=Homo sapiens GN=EXOC5 PE=1 SV=1 - [EXOC5_HUMAN]	708	81.8	1.001	0.98	1.024	1.078	1.069	20	20	22	22	7.5	22	11.4	22	14	22	10.4	22	11.1
Q8TAG9	EXOC6	Exocyst complex component 6	Exocyst complex component 6 OS=Homo sapiens GN=EXOC6 PE=1 SV=3 - [EXOC6_HUMAN]	804	93.7	0.962	0.938	0.901	1.016	0.991	7	8	14	13	9.9	13	7.5	13	8.4	13	8.1	13	7.6
J3QT38	EXOC6B		Exocyst complex component 6B OS=Homo sapiens GN=EXOC6B PE=4 SV=1 - [J3QT38_HUMAN]	681	79.3	1.006	1.141	1.383	1.435	1.31	2	3	3	2	6	2	9.4	2	15.1	2	17	2	19.3
Q9UPT5	EXOC7	Exocyst complex component 7	Exocyst complex component 7 OS=Homo sapiens GN=EXOC7 PE=1 SV=3 - [EXOC7_HUMAN]	735	83.3	0.995	0.957	0.971	1.047	1.002	15	15	18	18	4.7	18	8.7	18	8.9	18	8.6	18	7.7
Q8IYI6	EXOC8	Exocyst complex component 8	Exocyst complex component 8 OS=Homo sapiens GN=EXOC8 PE=1 SV=2 - [EXOC8_HUMAN]	725	81.7	1.018	0.962	1.039	1.167	1.093	12	12	16	16	8.8	16	12.8	16	25	16	24.4	16	13
Q9Y2C4	EXOG	Nuclease EXOG, mitochondrial	Nuclease EXOG, mitochondrial OS=Homo sapiens GN=EXOG PE=1 SV=2 - [EXOG_HUMAN]	368	41.1	1.021	1.372	1.828	2.036	1.671	6	6	11	11	11.2	11	9.6	11	14.9	11	14.5	11	16.3
B1AMU7	EXOSC1		Exosome complex component CSL4 (Fragment) OS=Homo sapiens GN=EXOSC1 PE=2 SV=2 - [B1AMU7_HUMAN]	165	17.9	1.005	0.996	0.918	0.896	0.913	4	4	8	8	1.5	8	6	8	12.1	8	4.8	8	9.5
Q01780	EXOSC10	Exosome component 10	Exosome component 10 OS=Homo sapiens GN=EXOSC10 PE=1 SV=2 - [EXOSX_HUMAN]	885	100.8	0.944	0.905	0.799	0.765	0.849	30	30	42	42	5.8	42	6.3	42	10.7	42	10.9	42	6.7
B4DKK6	EXOSC2		Exosome complex component RRP4 OS=Homo sapiens GN=EXOSC2 PE=2 SV=1 - [B4DKK6_HUMAN]	267	30	1.059	1.01	1.021	0.995	0.959	10	10	16	16	7.2	16	15.2	16	10.7	16	11.6	16	14.4
Q9NQT5	EXOSC3	Exosome complex component RRP40	Exosome complex component RRP40 OS=Homo sapiens GN=EXOSC3 PE=1 SV=3 - [EXOS3_HUMAN]	275	29.6	0.975	1.162	1.179	1.102	1.075	8	8	12	12	9	12	23.4	12	26.4	12	13.2	12	20.1
Q9NPD3	EXOSC4	Exosome complex component RRP41	Exosome complex component RRP41 OS=Homo sapiens GN=EXOSC4 PE=1 SV=3 - [EXOS4_HUMAN]	245	26.4	1.032	0.989	1.083	1.1	1.016	4	4	8	8	11.8	8	20	8	10.9	8	12.6	8	17.2
M0R050	EXOSC5		Exosome complex component RRP46 OS=Homo sapiens GN=EXOSC5 PE=4 SV=1 - [M0R050_HUMAN]	197	21.2	1.032	0.97	0.909	0.904	0.943	4	4	7	7	4.1	7	11.9	7	11.5	7	9.4	7	5.5
Q5RKV6	EXOSC6	Exosome complex component MTR3	Exosome complex component MTR3 OS=Homo sapiens GN=EXOSC6 PE=1 SV=1 - [EXOS6_HUMAN]	272	28.2	0.989	1.012	1.051	0.94	0.979	5	5	7	7	10	7	12.3	7	15.1	7	5.6	7	7.1
Q15024	EXOSC7	Exosome complex component RRP42	Exosome complex component RRP42 OS=Homo sapiens GN=EXOSC7 PE=1 SV=3 - [EXOS7_HUMAN]	291	31.8	0.982	1.009	0.948	0.958	1.007	9	9	18	17	6.7	17	8.5	17	8.9	17	9.7	17	13.3
Q96B26	EXOSC8	Exosome complex component RRP43	Exosome complex component RRP43 OS=Homo sapiens GN=EXOSC8 PE=1 SV=1 - [EXOS8_HUMAN]	276	30	0.998	1.061	1.117	1.012	0.974	10	10	18	18	9.2	18	13.8	18	17.2	18	13	18	9.1
Q06265	EXOSC9	Exosome complex component RRP45	Exosome complex component RRP45 OS=Homo sapiens GN=EXOSC9 PE=1 SV=3 - [EXOS9_HUMAN]	439	48.9	0.993	0.975	0.973	0.884	0.962	11	11	19	18	5.8	18	6.6	18	7.5	18	9.3	18	9.4
F5GZK1	EXTL2		Processed exostosin-like 2 OS=Homo sapiens GN=EXTL2 PE=2 SV=1 - [F5GZK1_HUMAN]	317	35.9	0.677	1.124	1.139	1.044	0.908	1	1	1	1	NaN	1	NaN	1	NaN	1	NaN	1	NaN
B1APR7	EYA3		Eyes absent homolog 3 OS=Homo sapiens GN=EYA3 PE=2 SV=1 - [B1APR7_HUMAN]	416	45.5	1.014	0.982	0.842	0.687	0.993	1	1	1	1	NaN	1	NaN	1	NaN	1	NaN	1	NaN
Q15910	EZH2	Histone-lysine N-methyltransferase EZH2	Histone-lysine N-methyltransferase EZH2 OS=Homo sapiens GN=EZH2 PE=1 SV=2 - [EZH2_HUMAN]	746	85.3	0.922	0.991	1.012	1.058	1.017	13	13	17	17	8.5	17	9.8	17	11.5	17	15.1	17	12.7
P15311	EZR	Ezrin	Ezrin OS=Homo sapiens GN=EZR PE=1 SV=4 - [EZRI_HUMAN]	586	69.4	1.023	0.982	1.032	1.084	1.112	26	34	108	73	10.2	73	12.7	73	13.6	73	13.8	73	15.2
P23610	F8A1	Factor VIII intron 22 protein	Factor VIII intron 22 protein OS=Homo sapiens GN=F8A1 PE=1 SV=2 - [F8I2_HUMAN]	371	39.1	1.077	0.936	0.892	0.981	0.915	1	1	1	1	NaN	1	NaN	1	NaN	1	NaN	1	NaN
Q01469	FABP5	Fatty acid-binding protein, epidermal	Fatty acid-binding protein, epidermal OS=Homo sapiens GN=FABP5 PE=1 SV=3 - [FABP5_HUMAN]	135	15.2	1.045	0.936	0.795	0.783	0.913	8	8	42	40	7.6	40	12.4	40	12.3	40	13.8	40	11.5
P51161	FABP6	Gastrotropin	Gastrotropin OS=Homo sapiens GN=FABP6 PE=1 SV=2 - [FABP6_HUMAN]	128	14.4	1.044	0.909	0.895	0.946	0.96	7	7	12	12	4.3	12	4.8	12	8.5	12	7.5	12	7.7
Q13158	FADD	Protein FADD	Protein FADD OS=Homo sapiens GN=FADD PE=1 SV=1 - [FADD_HUMAN]	208	23.3	0.959	0.961	0.989	1.066	0.951	3	3	10	10	13.3	10	38.1	10	22.1	10	21.5	10	24.2
O60427	FADS1	Fatty acid desaturase 1	Fatty acid desaturase 1 OS=Homo sapiens GN=FADS1 PE=1 SV=2 - [FADS1_HUMAN]	501	57.8	1.036	1.007	1.21	1.141	0.941	5	5	5	5	3.5	5	1.7	5	5.9	5	4.8	5	3.1
O95864	FADS2	Fatty acid desaturase 2	Fatty acid desaturase 2 OS=Homo sapiens GN=FADS2 PE=1 SV=1 - [FADS2_HUMAN]	444	52.2	1.057	1.028	1.648	0.987	0.642	5	5	7	7	2	7	7.5	7	8.8	7	7.7	7	13.1
Q9UNN5	FAF1	FAS-associated factor 1	FAS-associated factor 1 OS=Homo sapiens GN=FAF1 PE=1 SV=2 - [FAF1_HUMAN]	650	73.9	1.016	0.935	0.858	0.794	0.864	17	17	28	27	5.1	27	9.6	27	12.3	27	7.7	27	6.8
Q96CS3	FAF2	FAS-associated factor 2	FAS-associated factor 2 OS=Homo sapiens GN=FAF2 PE=1 SV=2 - [FAF2_HUMAN]	445	52.6	1.076	1.078	1.158	1.247	1.022	9	9	16	16	9.5	16	13.8	16	15.8	16	8.4	16	11.5
P16930	FAH	Fumarylacetoacetase	Fumarylacetoacetase OS=Homo sapiens GN=FAH PE=1 SV=2 - [FAAA_HUMAN]	419	46.3	1.014	0.909	0.94	0.917	0.78	6	6	10	10	10.5	10	22.3	10	15.8	10	14.6	10	8.7
Q6P587	FAHD1	Acylpyruvase FAHD1, mitochondrial	Acylpyruvase FAHD1, mitochondrial OS=Homo sapiens GN=FAHD1 PE=1 SV=2 - [FAHD1_HUMAN]	224	24.8	1.001	0.989	1.18	1.23	1.085	3	3	6	6	6.6	6	3.4	6	9.1	6	8.2	6	10.8
Q96GK7	FAHD2A	Fumarylacetoacetate hydrolase domain-containing protein 2A	Fumarylacetoacetate hydrolase domain-containing protein 2A OS=Homo sapiens GN=FAHD2A PE=1 SV=1 - [FAH2A_HUMAN]	314	34.6	1.006	0.98	1.07	1.108	1.001	3	9	13	3	3.9	3	7.8	3	1.3	3	8.6	3	3.3
Q6P2I3	FAHD2B	Fumarylacetoacetate hydrolase domain-containing protein 2B	Fumarylacetoacetate hydrolase domain-containing protein 2B OS=Homo sapiens GN=FAHD2B PE=2 SV=1 - [FAH2B_HUMAN]	314	34.6	1.19	0.688	0.812	1.278	0.821	1	7	10	1	NaN	1	NaN	1	NaN	1	NaN	1	NaN
Q9NVQ4	FAIM	Fas apoptotic inhibitory molecule 1	Fas apoptotic inhibitory molecule 1 OS=Homo sapiens GN=FAIM PE=1 SV=1 - [FAIM1_HUMAN]	179	20.2	0.89	0.936	0.807	0.764	0.86	2	2	2	2	0.9	2	4.7	2	4.8	2	3.5	2	0.2
Q8N5W9	FAM101B	Protein FAM101B	Protein FAM101B OS=Homo sapiens GN=FAM101B PE=1 SV=1 - [F101B_HUMAN]	214	22.9	0.924	1.027	1.315	0.863	1.46	3	3	5	5	10	5	16.1	5	55	5	33.5	5	8.1
Q5T8I3	FAM102B	Protein FAM102B	Protein FAM102B OS=Homo sapiens GN=FAM102B PE=1 SV=2 - [F102B_HUMAN]	360	39.3	0.988	1.184	1.347	1.54	0.957	1	2	2	1	NaN	1	NaN	1	NaN	1	NaN	1	NaN
Q9BTL3	FAM103A1	RNMT-activating mini protein	RNMT-activating mini protein OS=Homo sapiens GN=FAM103A1 PE=1 SV=1 - [RAM_HUMAN]	118	14.4	1.137	0.937	0.865	1.003	0.924	4	4	4	4	3.2	4	5.6	4	9.1	4	14.3	4	11.3
Q96BN8	FAM105B	Protein FAM105B	Ubiquitin thioesterase otulin OS=Homo sapiens GN=FAM105B PE=1 SV=3 - [OTUL_HUMAN]	352	40.2	0.981	0.987	0.978	1.103	0.979	8	8	15	15	13.7	15	10.1	15	7.9	15	5.2	15	11.4
C9J6N5	FAM107B		Protein FAM107B (Fragment) OS=Homo sapiens GN=FAM107B PE=2 SV=1 - [C9J6N5_HUMAN]	125	14.9	1.014	0.888	0.864	0.893	1.121	5	5	5	5	1.7	5	15.2	5	3.2	5	19.2	5	4.1
Q9BQ89	FAM110A	Protein FAM110A	Protein FAM110A OS=Homo sapiens GN=FAM110A PE=1 SV=1 - [F110A_HUMAN]	295	31.3	0.683	0.642	1.214	0.946	1.041	1	1	1	1	NaN	1	NaN	1	NaN	1	NaN	1	NaN
Q96PZ2	FAM111A	Protein FAM111A	Protein FAM111A OS=Homo sapiens GN=FAM111A PE=1 SV=2 - [F111A_HUMAN]	611	70.2	0.964	1.511	1.16	1.178	1.117	2	2	3	3	7.3	3	4.9	3	12.8	3	33.2	3	9.5
Q6SJ93	FAM111B	Protein FAM111B	Protein FAM111B OS=Homo sapiens GN=FAM111B PE=2 SV=1 - [F111B_HUMAN]	734	84.6	0.984	0.968	1.008	0.976	1.278	1	1	1	1	NaN	1	NaN	1	NaN	1	NaN	1	NaN
Q9NRY5	FAM114A2	Protein FAM114A2	Protein FAM114A2 OS=Homo sapiens GN=FAM114A2 PE=1 SV=4 - [F1142_HUMAN]	505	55.4	1.016	0.984	1.139	1.226	1.085	12	12	16	16	11.1	16	7.5	16	13.5	16	8.3	16	11.4
Q9Y4C2	FAM115A	Protein FAM115A	Protein FAM115A OS=Homo sapiens GN=FAM115A PE=1 SV=3 - [F115A_HUMAN]	921	102.1	0.889	1.375	1.312	1.244	0.988	3	3	3	3	8.3	3	3	3	30.3	3	2.9	3	7.7
Q6P1L5	FAM117B	Protein FAM117B	Protein FAM117B OS=Homo sapiens GN=FAM117B PE=1 SV=2 - [F117B_HUMAN]	589	61.9	1.167	0.885	0.818	0.817	0.965	2	2	3	3	0.4	3	2.8	3	2.9	3	0.4	3	1.8
B4DY02	FAM118A		Protein FAM118A OS=Homo sapiens GN=FAM118A PE=2 SV=1 - [B4DY02_HUMAN]	175	19.7	1.091	0.879	0.958	1.165	0.72	1	1	1	1	NaN	1	NaN	1	NaN	1	NaN	1	NaN
E9PMJ2	FAM118B		Protein FAM118B (Fragment) OS=Homo sapiens GN=FAM118B PE=2 SV=1 - [E9PMJ2_HUMAN]	347	39.1	0.938	1.162	1.456	1.593	1.275	5	5	9	9	14.7	9	6.8	9	9.8	9	8	9	7.9
Q9NZB2	FAM120A	Constitutive coactivator of PPAR-gamma-like protein 1	Constitutive coactivator of PPAR-gamma-like protein 1 OS=Homo sapiens GN=FAM120A PE=1 SV=2 - [F120A_HUMAN]	1118	121.8	0.946	0.975	0.971	0.996	1.024	22	24	43	40	8.7	40	8.5	40	8.2	40	8.4	40	9.1
F2Z2E1	FAM120B		Constitutive coactivator of peroxisome proliferator-activated receptor gamma OS=Homo sapiens GN=FAM120B PE=2 SV=1 - [F2Z2E1_HUMAN]	891	101	0.924	1.094	1.01	1.089	0.957	3	3	4	4	21.1	4	14.9	4	15.6	4	4.8	4	15.2
Q9NX05	FAM120C	Constitutive coactivator of PPAR-gamma-like protein 2	Constitutive coactivator of PPAR-gamma-like protein 2 OS=Homo sapiens GN=FAM120C PE=2 SV=3 - [F120C_HUMAN]	1096	120.5	0.961	0.969	1.009	0.985	1.034	4	6	7	4	10.1	4	3.6	4	6.7	4	17.7	4	9.1
Q7Z309	FAM122B	Protein FAM122B	Protein FAM122B OS=Homo sapiens GN=FAM122B PE=1 SV=2 - [F122B_HUMAN]	247	26.9	0.949	0.946	0.848	0.639	0.931	1	1	1	1	NaN	1	NaN	1	NaN	1	NaN	1	NaN
B8ZZJ1	FAM126A		Hyccin OS=Homo sapiens GN=FAM126A PE=2 SV=1 - [B8ZZJ1_HUMAN]	419	46.9	0.807	1.141	1.155	1.114	1.384	3	3	3	3	4.4	3	10.6	3	8.2	3	13	3	4.6
Q9BZQ8	FAM129A	Protein Niban	Protein Niban OS=Homo sapiens GN=FAM129A PE=1 SV=1 - [NIBAN_HUMAN]	928	103.1	1.033	1.07	1.192	1.353	1.186	5	5	5	5	9.9	5	8.7	5	12.8	5	8.2	5	12.5
G3XAI9	FAM133B		Protein FAM133B OS=Homo sapiens GN=FAM133B PE=2 SV=1 - [G3XAI9_HUMAN]	105	12.4	1.03	0.898	0.535	0.364	0.798	1	1	1	1	NaN	1	NaN	1	NaN	1	NaN	1	NaN
Q8NC44	FAM134A	Protein FAM134A	Protein FAM134A OS=Homo sapiens GN=FAM134A PE=1 SV=3 - [F134A_HUMAN]	543	57.8	0.957	0.925	0.988	0.996	1.064	2	2	2	2	5.7	2	0.9	2	24.8	2	7.2	2	10.7
K7ENZ6	FAM134C		Protein FAM134C OS=Homo sapiens GN=FAM134C PE=4 SV=1 - [K7ENZ6_HUMAN]	80	8.7	0.998	1.023	1.265	1.393	1.049	1	1	2	2	7.9	2	8.7	2	5.4	2	3.6	2	4.2
Q96C01	FAM136A	Protein FAM136A	Protein FAM136A OS=Homo sapiens GN=FAM136A PE=1 SV=1 - [F136A_HUMAN]	138	15.6	0.966	0.945	0.848	0.82	0.928	6	6	14	14	4.2	14	3.6	14	7.6	14	6.1	14	3.4
Q5W0V3	FAM160B1	Protein FAM160B1	Protein FAM160B1 OS=Homo sapiens GN=FAM160B1 PE=2 SV=1 - [F16B1_HUMAN]	765	86.5	1.013	1.077	1.134	1.181	1.094	16	17	24	23	7.9	23	11.3	23	6.8	23	10.5	23	14
Q86V87	FAM160B2	Protein FAM160B2	Protein FAM160B2 OS=Homo sapiens GN=FAM160B2 PE=2 SV=2 - [F16B2_HUMAN]	743	82.3	0.919	0.993	0.73	1.171	1.154	1	2	2	1	NaN	1	NaN	1	NaN	1	NaN	1	NaN
F8W7Q4	FAM162A		Protein FAM162A OS=Homo sapiens GN=FAM162A PE=2 SV=1 - [F8W7Q4_HUMAN]	144	16.5	1.085	0.871	1.062	0.927	0.689	5	5	14	14	4.5	14	7.4	14	6	14	5.1	14	11
Q92567	FAM168A	Protein FAM168A	Protein FAM168A OS=Homo sapiens GN=FAM168A PE=1 SV=2 - [F168A_HUMAN]	244	26.2	0.994	1.035	1.139	1.089	1.128	1	1	1	1	NaN	1	NaN	1	NaN	1	NaN	1	NaN
D6RB01	FAM169A		Soluble lamin-associated protein of 75 kDa OS=Homo sapiens GN=FAM169A PE=2 SV=1 - [D6RB01_HUMAN]	610	68	1.065	1.21	1.113	1.258	1.278	3	3	3	3	7.5	3	20.8	3	4.3	3	0.5	3	9.4
Q5VUB5	FAM171A1	Protein FAM171A1	Protein FAM171A1 OS=Homo sapiens GN=FAM171A1 PE=1 SV=1 - [F1711_HUMAN]	890	97.8	1.042	0.872	0.825	0.841	0.973	1	1	3	2	8.7	2	4.1	2	0.8	2	8.6	2	16.9
Q8WUF8	FAM172A	Protein FAM172A	Protein FAM172A OS=Homo sapiens GN=FAM172A PE=2 SV=1 - [F172A_HUMAN]	416	47.9	1.029	1.1	1.197	1.155	1.133	6	6	6	6	1.6	6	2.8	6	2.7	6	7	6	6.5
Q15018	FAM175B	BRISC complex subunit Abro1	BRISC complex subunit Abro1 OS=Homo sapiens GN=FAM175B PE=1 SV=2 - [F175B_HUMAN]	415	46.9	1.005	0.912	0.914	0.997	0.922	12	12	19	19	5.2	19	7.1	19	9.8	19	8	19	13.2
G3V583	FAM177A1		Protein FAM177A1 (Fragment) OS=Homo sapiens GN=FAM177A1 PE=2 SV=1 - [G3V583_HUMAN]	140	16.3	0.999	1.191	1.217	1.485	1.18	2	2	2	2	15.7	2	3.5	2	11.5	2	6.4	2	18.6
Q9H8M7	FAM188A	Protein FAM188A	Protein FAM188A OS=Homo sapiens GN=FAM188A PE=1 SV=1 - [F188A_HUMAN]	445	49.7	0.869	0.997	1.116	1.215	0.881	2	2	2	2	0.9	2	6	2	9.8	2	18.5	2	5.4
H3BUL4	FAM192A		Protein FAM192A (Fragment) OS=Homo sapiens GN=FAM192A PE=2 SV=1 - [H3BUL4_HUMAN]	160	19.4	1.056	1.312	1.289	1.141	1.201	6	6	6	6	7.4	6	7	6	10.6	6	7	6	5
E7EUR8	FAM193A		Protein FAM193A (Fragment) OS=Homo sapiens GN=FAM193A PE=2 SV=1 - [E7EUR8_HUMAN]	1006	110.7	1.056	1.199	0.8	0.852	1.01	1	2	3	1	NaN	1	NaN	1	NaN	1	NaN	1	NaN
Q9BUT9	FAM195A	Protein FAM195A	Protein FAM195A OS=Homo sapiens GN=FAM195A PE=1 SV=2 - [F195A_HUMAN]	160	17.8	1.093	0.724	0.402	0.269	0.717	1	1	1	1	NaN	1	NaN	1	NaN	1	NaN	1	NaN
I3L2L5	FAM195B		Protein FAM195B OS=Homo sapiens GN=FAM195B PE=2 SV=1 - [I3L2L5_HUMAN]	92	10.5	1.036	0.998	0.907	0.802	1.218	3	3	5	5	3.4	5	14	5	19.5	5	3.9	5	5.4
P0CB43	FAM203B	Protein FAM203B	Protein FAM203B OS=Homo sapiens GN=FAM203B PE=1 SV=1 - [F203B_HUMAN]	390	42.1	0.956	0.929	0.702	0.593	0.916	4	4	7	7	2.1	7	8.4	7	4.8	7	22.1	7	6.7
Q63HN1	FAM205B	Protein FAM205B	Protein FAM205B OS=Homo sapiens GN=FAM205B PE=2 SV=1 - [F205B_HUMAN]	556	61.8	1.038	0.846	0.747	0.746	0.666	1	1	2	2	1.9	2	10.4	2	3.7	2	7.5	2	8
Q9NX38	FAM206A	Protein FAM206A	Protein FAM206A OS=Homo sapiens GN=FAM206A PE=2 SV=1 - [F206A_HUMAN]	181	20.4	0.977	0.997	1.051	0.961	1.109	2	2	2	2	5.7	2	1.3	2	3.8	2	1.3	2	1.5
Q9NSI2	FAM207A	Protein FAM207A	Protein FAM207A OS=Homo sapiens GN=FAM207A PE=1 SV=2 - [F207A_HUMAN]	230	25.4	0.921	0.895	0.598	0.524	0.874	6	6	8	8	8	8	16.2	8	17.6	8	35	8	11.9
Q9UK61	FAM208A	Protein FAM208A	Protein FAM208A OS=Homo sapiens GN=FAM208A PE=1 SV=3 - [F208A_HUMAN]	1670	188.9	0.965	0.951	0.905	0.872	0.986	14	14	14	14	2	14	9.4	14	7.3	14	10.2	14	12
Q5VWN6	FAM208B	Protein FAM208B	Protein FAM208B OS=Homo sapiens GN=FAM208B PE=1 SV=1 - [F208B_HUMAN]	2430	268.7	1.049	0.919	0.722	0.712	0.881	1	2	2	1	NaN	1	NaN	1	NaN	1	NaN	1	NaN
O75063	FAM20B	Glycosaminoglycan xylosylkinase	Glycosaminoglycan xylosylkinase OS=Homo sapiens GN=FAM20B PE=1 SV=1 - [XYLK_HUMAN]	409	46.4	0.851	0.92	0.899	0.895	0.941	2	2	2	2	5	2	2	2	14.8	2	3.3	2	2.1
K7EK00	FAM210A		Protein FAM210A (Fragment) OS=Homo sapiens GN=FAM210A PE=4 SV=1 - [K7EK00_HUMAN]	268	30.3	1.059	0.873	0.958	0.892	0.813	2	2	2	2	7.6	2	10.3	2	3.8	2	1.2	2	0.8
F8W7U3	FAM21A		WASH complex subunit FAM21A OS=Homo sapiens GN=FAM21A PE=2 SV=1 - [F8W7U3_HUMAN]	1253	136.8	0.927	0.958	0.904	0.815	1.019	4	17	18	4	20.7	4	20.3	4	15.8	4	10.5	4	16.9
J3KP36	FAM21C		WASH complex subunit FAM21C OS=Homo sapiens GN=FAM21C PE=4 SV=1 - [J3KP36_HUMAN]	1262	137.9	0.986	1.027	1.041	1.095	0.985	4	17	18	4	13.4	4	10.9	4	9.8	4	10.3	4	17.3
K7ELZ8	FAM32A		Protein FAM32A (Fragment) OS=Homo sapiens GN=FAM32A PE=4 SV=1 - [K7ELZ8_HUMAN]	82	9.4	0.915	0.947	0.494	0.363	0.806	1	1	1	1	NaN	1	NaN	1	NaN	1	NaN	1	NaN
Q92520	FAM3C	Protein FAM3C	Protein FAM3C OS=Homo sapiens GN=FAM3C PE=1 SV=1 - [FAM3C_HUMAN]	227	24.7	0.887	1.117	0.954	0.854	0.995	6	6	8	8	7	8	4.2	8	9.8	8	7.7	8	6.8
B4DMU4	FAM45A		Protein FAM45A OS=Homo sapiens GN=FAM45A PE=2 SV=1 - [B4DMU4_HUMAN]	206	23.3	1.024	0.955	1.057	1.141	1.12	4	4	4	4	1.1	4	3.8	4	3.4	4	4.8	4	10.5
Q9NUQ9	FAM49B	Protein FAM49B	Protein FAM49B OS=Homo sapiens GN=FAM49B PE=1 SV=1 - [FA49B_HUMAN]	324	36.7	1.01	1.016	1.109	1.157	1.06	16	16	52	52	7.8	52	13.1	52	16	52	16.2	52	14.4
Q14320	FAM50A	Protein FAM50A	Protein FAM50A OS=Homo sapiens GN=FAM50A PE=1 SV=2 - [FA50A_HUMAN]	339	40.2	0.977	0.925	0.856	0.9	0.943	8	8	16	16	5.1	16	4.2	16	7.5	16	6.4	16	4.8
Q9NYF3	FAM53C	Protein FAM53C	Protein FAM53C OS=Homo sapiens GN=FAM53C PE=1 SV=1 - [FA53C_HUMAN]	392	43.1	0.6	0.655	0.48	0.698	0.538	1	1	1	1	NaN	1	NaN	1	NaN	1	NaN	1	NaN
Q9NP50	FAM60A	Protein FAM60A	Protein FAM60A OS=Homo sapiens GN=FAM60A PE=1 SV=1 - [FA60A_HUMAN]	221	24.8	0.701	0.474	0.466	0.451	0.634	2	2	2	2	21.7	2	19.9	2	4.5	2	16.8	2	26.3
E9PQL1	FAM76A		Protein FAM76A OS=Homo sapiens GN=FAM76A PE=2 SV=1 - [E9PQL1_HUMAN]	288	33.1	1.054	1.027	0.939	0.829	0.908	3	3	3	3	4.6	3	10	3	1.3	3	15.4	3	3.9
F5GX09	FAM76B		Protein FAM76B OS=Homo sapiens GN=FAM76B PE=2 SV=1 - [F5GX09_HUMAN]	338	38.6	1.006	1.07	0.99	0.98	1.034	7	7	7	7	8.5	7	8.1	7	4.8	7	9.9	7	13.9
H0Y947	FAM81B		Protein FAM81B (Fragment) OS=Homo sapiens GN=FAM81B PE=4 SV=1 - [H0Y947_HUMAN]	182	20.3	0.957	1.065	1.056	0.922	0.788	1	1	1	1	NaN	1	NaN	1	NaN	1	NaN	1	NaN
Q5T0W9	FAM83B	Protein FAM83B	Protein FAM83B OS=Homo sapiens GN=FAM83B PE=1 SV=1 - [FA83B_HUMAN]	1011	114.7	0.938	1.218	0.865	1.116	1.297	1	1	1	1	NaN	1	NaN	1	NaN	1	NaN	1	NaN
Q9H4H8	FAM83D	Protein FAM83D	Protein FAM83D OS=Homo sapiens GN=FAM83D PE=1 SV=3 - [FA83D_HUMAN]	585	64.4	1.095	1.154	1.836	2.632	1.087	4	4	6	6	8.3	6	12.8	6	37.1	6	21.7	6	18.1
Q9UBU6	FAM8A1	Protein FAM8A1	Protein FAM8A1 OS=Homo sapiens GN=FAM8A1 PE=1 SV=1 - [FA8A1_HUMAN]	413	44.1	1.224	1.103	0.944	1.099	1.01	1	1	1	1	NaN	1	NaN	1	NaN	1	NaN	1	NaN
Q658Y4	FAM91A1	Protein FAM91A1	Protein FAM91A1 OS=Homo sapiens GN=FAM91A1 PE=1 SV=3 - [F91A1_HUMAN]	838	93.8	1.032	1.035	1.01	1.088	1.025	11	11	11	11	4.4	11	6.8	11	11.1	11	10.6	11	11.1
H0YKV4	FAM96A		Family with sequence similarity 96, member A, isoform CRA_a OS=Homo sapiens GN=FAM96A PE=2 SV=1 - [H0YKV4_HUMAN]	130	14.9	1.173	1.017	1.025	1.12	1.025	1	1	1	1	NaN	1	NaN	1	NaN	1	NaN	1	NaN
H3BNV7	FAM96B		Mitotic spindle-associated MMXD complex subunit MIP18 (Fragment) OS=Homo sapiens GN=FAM96B PE=4 SV=1 - [H3BNV7_HUMAN]	161	17.6	1.075	1.088	1.091	1.115	0.929	3	3	6	6	5.5	6	16.6	6	17.7	6	20.9	6	7
Q8NCA5	FAM98A	Protein FAM98A	Protein FAM98A OS=Homo sapiens GN=FAM98A PE=1 SV=1 - [FA98A_HUMAN]	519	55.4	0.999	1	1.002	0.937	0.91	5	7	14	11	3	11	4.9	11	14.9	11	3.5	11	5.5
[truncated: 4,627 more rows]

## Sheet: Gene search and plots
																										6	7	8	9	10	11	12	13
[truncated: 27 more rows]
[truncated: 1 more columns]

## Sheet: Gene name aliases
Gene name	Aliases
[truncated: 6,538 more rows]
[truncated: 14 more columns]
