# Supplementary material for: Temporal proteomic analysis of HIV infection reveals remodelling of the host phosphoproteome by lentiviral Vif variants
Source: eLife. 2016 Sep 30;5:e18296. doi: 10.7554/eLife.18296 (PMC5085607; doi:10.7554/eLife.18296)
Supplement: Figure 2—source data 1. — Spreadsheet of all proteomic data for proteins in clusters #1–4. Each cluster is represented by a single worksheet, with proteins ranked according to the hierarchical cluster analysis shown (Figure 2A) and protein abundance depicted on a colour scale (red = downregulated; green = upregulated). As well as data from the TMT-based proteomic time course experiment (Figure 1 and Figure 1—source data 1), additional data from the SILAC-based proteomic validation (Figure 2C and Figure 2—figure supplement 1A) and TMT-based single timepoint experiment (Figure 4A and Figure 4—figure supplement 1A) are also included. The number of unique peptides is shown for each protein (TMT experiments) and each timepoint (SILAC experiment). q values for the TMT-based single timepoint experiment were determined using Limma with Benjamini-Hochberg adjustment for multiple testing, with q values < 0.01 highlighted in gold. DOI: http://dx.doi.org/10.7554/eLife.18296.008 [file elife-18296-fig2-data1.xlsx]

## Sheet: Cluster #1
Gene of interest						Exp. 1: TMT time course						Exp. 2: SILAC validation time course						Exp. 3: TMT single timepoint
Accession	Gene name	Protein name	Description	# AAs	MW [kDa]	6 h	24 h	48 h	72 h	RTi	UniPeps	24 h	48 h	72 h	UniPeps 24 h	UniPeps 48 h	UniPeps 72 h	48 h	q-value	UniPeps
C9J8Z4	IGSF8		Immunoglobulin superfamily member 8 (Fragment) OS=Homo sapiens GN=IGSF8 PE=2 SV=1 - [C9J8Z4_HUMAN]	301	32.3	0.893	1.154	0.569	0.498	1.451	5	0.58605	0.53078	0.52541	3	4	4	0.68302	0.000917508	7
P30154	PPP2R1B	Serine/threonine-protein phosphatase 2A 65 kDa regulatory subunit A beta isoform	Serine/threonine-protein phosphatase 2A 65 kDa regulatory subunit A beta isoform OS=Homo sapiens GN=PPP2R1B PE=1 SV=3 - [2AAB_HUMAN]	601	66.2	0.968	1.035	0.451	0.391	1.395	13	0.6627	0.40768	0.39783	2	3	3	0.619854	7.93347e-05	14
Q13136	PPFIA1	Liprin-alpha-1	Liprin-alpha-1 OS=Homo sapiens GN=PPFIA1 PE=1 SV=1 - [LIPA1_HUMAN]	1202	135.7	0.959	1.097	0.531	0.404	1.432	6	0.82657	0.61949	0.51723	7	7	8	0.697372	0.000150506	19
H0YKX3	KIAA0101		PCNA-associated factor OS=Homo sapiens GN=KIAA0101 PE=2 SV=1 - [H0YKX3_HUMAN]	84	9.3	1.024	1.428	0.574	0.363	1.193	4	0.76838	0.98565	0.6998	3	2	1	1.1487	0.00845194	4
P04818	TYMS	Thymidylate synthase	Thymidylate synthase OS=Homo sapiens GN=TYMS PE=1 SV=3 - [TYSY_HUMAN]	313	35.7	1.045	1.007	0.637	0.339	1.316	10	0.67684	0.42148	0.38335	5	7	7	0.737135	0.00035442	11
P31350	RRM2	Ribonucleoside-diphosphate reductase subunit M2	Ribonucleoside-diphosphate reductase subunit M2 OS=Homo sapiens GN=RRM2 PE=1 SV=1 - [RIR2_HUMAN]	389	44.8	0.97	1.132	0.517	0.233	1.283	13	0.56759	0.44224	0.36343	10	12	13	0.646176	9.46194e-05	13
Q6PL18	ATAD2	ATPase family AAA domain-containing protein 2	ATPase family AAA domain-containing protein 2 OS=Homo sapiens GN=ATAD2 PE=1 SV=1 - [ATAD2_HUMAN]	1390	158.5	1.017	0.97	0.58	0.34	1.131	17	0.52836	0.53167	0.49446	20	21	15	0.582367	3.54477e-05	35
P56559	ARL4C	ADP-ribosylation factor-like protein 4C	ADP-ribosylation factor-like protein 4C OS=Homo sapiens GN=ARL4C PE=1 SV=1 - [ARL4C_HUMAN]	192	21.5	0.808	1.13	0.708	0.484	1.149	5	NaN	NaN	NaN	NaN	NaN	NaN	0.926588	0.283315	3
P01730	CD4	T-cell surface glycoprotein CD4	T-cell surface glycoprotein CD4 OS=Homo sapiens GN=CD4 PE=1 SV=1 - [CD4_HUMAN]	458	51.1	1.054	0.579	0.161	0.179	1.133	6	0.69022	0.2809	0.60386	3	3	2	0.358489	3.27022e-05	9
B7ZKK9	PPP2R5E		PPP2R5E protein OS=Homo sapiens GN=PPP2R5E PE=2 SV=1 - [B7ZKK9_HUMAN]	462	54	0.954	0.791	0.253	0.181	1.096	6	0.56919	0.27954	0.26304	5	4	1	0.429283	2.87225e-05	13
A8MQB8	FMR1		Fragile X mental retardation protein 1 OS=Homo sapiens GN=FMR1 PE=2 SV=1 - [A8MQB8_HUMAN]	582	65.8	1.015	0.922	0.499	0.414	1.069	10	0.73791	0.50713	0.42983	7	5	5	0.712025	0.000132292	19
E9PFR3	PPP2R5D		Serine/threonine-protein phosphatase 2A 56 kDa regulatory subunit delta isoform OS=Homo sapiens GN=PPP2R5D PE=2 SV=1 - [E9PFR3_HUMAN]	594	69.1	1.014	0.696	0.088	0.048	1.197	10	0.5611	0.21299	0.124	11	10	9	0.386891	7.87812e-05	13
Q13362	PPP2R5C	Serine/threonine-protein phosphatase 2A 56 kDa regulatory subunit gamma isoform	Serine/threonine-protein phosphatase 2A 56 kDa regulatory subunit gamma isoform OS=Homo sapiens GN=PPP2R5C PE=1 SV=3 - [2A5G_HUMAN]	524	61	1.039	0.675	0.232	0.176	1.09	4	0.46036	0.30996	0.1807	2	2	2	0.521233	5.06184e-05	8
Q15172	PPP2R5A	Serine/threonine-protein phosphatase 2A 56 kDa regulatory subunit alpha isoform	Serine/threonine-protein phosphatase 2A 56 kDa regulatory subunit alpha isoform OS=Homo sapiens GN=PPP2R5A PE=1 SV=1 - [2A5A_HUMAN]	486	56.2	0.916	0.655	0.118	0.092	1.19	5	0.46256	NaN	0.1145	4	4	2	0.293209	6.72234e-05	5
Q6PD74	AAGAB	Alpha- and gamma-adaptin-binding protein p34	Alpha- and gamma-adaptin-binding protein p34 OS=Homo sapiens GN=AAGAB PE=1 SV=1 - [AAGAB_HUMAN]	315	34.6	0.954	0.87	0.475	0.379	0.982	2	0.74489	NaN	0.58009	1	0	2	0.624165	0.000433091	4
Q9NRW3	APOBEC3C	DNA dC->dU-editing enzyme APOBEC-3C	DNA dC->dU-editing enzyme APOBEC-3C OS=Homo sapiens GN=APOBEC3C PE=1 SV=2 - [ABC3C_HUMAN]	190	22.8	0.992	0.451	0.06	0.018	1.066	2	0.29908	NaN	0.25415	1	1	2	0.241484	9.91265e-05	4
P16150	SPN	Leukosialin	Leukosialin OS=Homo sapiens GN=SPN PE=1 SV=1 - [LEUK_HUMAN]	400	40.3	1.012	0.986	0.589	0.462	1.142	7	0.85102	0.80123	0.61448	5	4	2	NaN	NaN	NaN
Q9H2H9	SLC38A1	Sodium-coupled neutral amino acid transporter 1	Sodium-coupled neutral amino acid transporter 1 OS=Homo sapiens GN=SLC38A1 PE=1 SV=1 - [S38A1_HUMAN]	487	54	0.974	0.934	0.472	0.449	1.203	4	NaN	NaN	0.3753	0	0	2	0.50698	0.00141749	5
Q99081	TCF12	Transcription factor 12	Transcription factor 12 OS=Homo sapiens GN=TCF12 PE=1 SV=1 - [HTF4_HUMAN]	682	72.9	0.891	0.706	0.473	0.402	1.117	3	0.39025	0.94976	0.33044	3	5	4	0.521233	2.22668e-05	5
C9JZE3	REPIN1		Replication initiator 1 (Fragment) OS=Homo sapiens GN=REPIN1 PE=2 SV=1 - [C9JZE3_HUMAN]	366	41.3	1.024	1.03	0.582	0.325	0.864	3	NaN	NaN	NaN	1	1	0	NaN	NaN	NaN
Q15223	PVRL1	Poliovirus receptor-related protein 1	Poliovirus receptor-related protein 1 OS=Homo sapiens GN=PVRL1 PE=1 SV=3 - [PVRL1_HUMAN]	517	57.1	1.062	1.031	0.711	0.49	0.945	4	0.84312	0.6881	0.36422	1	2	1	1.01396	0.799151	1
P23921	RRM1	Ribonucleoside-diphosphate reductase large subunit	Ribonucleoside-diphosphate reductase large subunit OS=Homo sapiens GN=RRM1 PE=1 SV=1 - [RIR1_HUMAN]	792	90	1.009	0.908	0.561	0.318	0.766	31	0.65818	0.41707	0.38693	17	17	13	0.532185	2.14798e-05	33
Q8WU10	PYROXD1	Pyridine nucleotide-disulfide oxidoreductase domain-containing protein 1	Pyridine nucleotide-disulfide oxidoreductase domain-containing protein 1 OS=Homo sapiens GN=PYROXD1 PE=1 SV=1 - [PYRD1_HUMAN]	500	55.8	1.037	0.983	0.675	0.49	0.872	3	NaN	NaN	0.89905	2	0	3	0.687771	0.000113025	8
O43303	CCP110	Centriolar coiled-coil protein of 110 kDa	Centriolar coiled-coil protein of 110 kDa OS=Homo sapiens GN=CCP110 PE=1 SV=3 - [CP110_HUMAN]	1012	113.4	0.924	1.083	0.688	0.483	0.94	4	1.033	2.5738	NaN	3	3	0	0.752623	0.000491961	12
I3L0U2	PRSS21		Testisin (Fragment) OS=Homo sapiens GN=PRSS21 PE=3 SV=1 - [I3L0U2_HUMAN]	218	24.8	0.901	0.92	0.572	0.422	0.898	2	0.62839	0.67913	0.55178	5	2	1	0.812252	0.0210971	4
Q9Y5N6	ORC6	Origin recognition complex subunit 6	Origin recognition complex subunit 6 OS=Homo sapiens GN=ORC6 PE=1 SV=1 - [ORC6_HUMAN]	252	28.1	0.937	0.976	0.596	0.45	0.974	4	0.72928	0.51818	0.61105	1	1	1	0.817902	0.00312479	6
Q99808	SLC29A1	Equilibrative nucleoside transporter 1	Equilibrative nucleoside transporter 1 OS=Homo sapiens GN=SLC29A1 PE=1 SV=3 - [S29A1_HUMAN]	456	50.2	0.806	0.939	0.68	0.493	0.851	3	0.66575	0.69305	0.5086	4	3	4	0.570382	0.000860308	4
Q9NR30	DDX21	Nucleolar RNA helicase 2	Nucleolar RNA helicase 2 OS=Homo sapiens GN=DDX21 PE=1 SV=5 - [DDX21_HUMAN]	783	87.3	0.954	1.016	0.663	0.491	0.713	31	0.69861	0.67489	0.61911	22	21	21	0.655197	0.000114838	46
Q8IZ21	PHACTR4	Phosphatase and actin regulator 4	Phosphatase and actin regulator 4 OS=Homo sapiens GN=PHACTR4 PE=1 SV=1 - [PHAR4_HUMAN]	702	78.2	0.89	0.662	0.422	0.504	1.23	3	1.2626	NaN	0.87294	3	2	3	0.97942	0.585006	9

## Sheet: Cluster #2
Gene of interest						Exp. 1: TMT time course						Exp. 2: SILAC validation time course						Exp. 3: TMT single timepoint
Accession	Gene name	Protein name	Description	# AAs	MW [kDa]	6 h	24 h	48 h	72 h	RTi	UniPeps	24 h	48 h	72 h	UniPeps 24 h	UniPeps 48 h	UniPeps 72 h	48 h	q-value	UniPeps
H9KV46	KIF18B		Kinesin-like protein KIF18B OS=Homo sapiens GN=KIF18B PE=2 SV=1 - [H9KV46_HUMAN]	855	93.3	0.469	0.329	0.488	0.58	0.523	2	NaN	0.75137	NaN	1	2	1	0.63728	0.000141095	5
P52952	NKX2-5	Homeobox protein Nkx-2.5	Homeobox protein Nkx-2.5 OS=Homo sapiens GN=NKX2-5 PE=1 SV=1 - [NKX25_HUMAN]	324	34.9	0.445	0.336	0.222	0.22	0.585	6	0.24348	0.42531	0.20262	6	6	5	0.293209	2.87225e-05	11
F8WAJ0	DDX31		Probable ATP-dependent RNA helicase DDX31 OS=Homo sapiens GN=DDX31 PE=2 SV=1 - [F8WAJ0_HUMAN]	722	80.9	0.81	0.596	0.51	0.488	0.698	11	0.34193	0.37563	0.75446	5	5	4	0.476319	9.30539e-05	10
Q6PK04	CCDC137	Coiled-coil domain-containing protein 137	Coiled-coil domain-containing protein 137 OS=Homo sapiens GN=CCDC137 PE=1 SV=1 - [CC137_HUMAN]	289	33.2	0.554	0.331	0.318	0.31	0.49	3	0.20503	0.60947	0.60239	3	2	2	0.41466	0.000442625	3
Q9NP50	FAM60A	Protein FAM60A	Protein FAM60A OS=Homo sapiens GN=FAM60A PE=1 SV=1 - [FA60A_HUMAN]	221	24.8	0.701	0.474	0.466	0.451	0.634	2	0.36433	NaN	NaN	3	1	0	0.460094	0.000760238	3
H7C0E6	DUSP11		RNA/RNP complex-1-interacting phosphatase (Fragment) OS=Homo sapiens GN=DUSP11 PE=2 SV=1 - [H7C0E6_HUMAN]	150	17.8	0.445	0.412	0.335	0.355	0.459	2	NaN	NaN	NaN	NaN	NaN	NaN	NaN	NaN	NaN
P13051	UNG	Uracil-DNA glycosylase	Uracil-DNA glycosylase OS=Homo sapiens GN=UNG PE=1 SV=2 - [UNG_HUMAN]	313	34.6	0.471	0.442	0.447	0.428	0.454	3	0.29459	0.94701	0.46184	1	0	1	0.664343	0.000235968	3
Q9NVN8	GNL3L	Guanine nucleotide-binding protein-like 3-like protein	Guanine nucleotide-binding protein-like 3-like protein OS=Homo sapiens GN=GNL3L PE=1 SV=1 - [GNL3L_HUMAN]	582	65.5	0.524	0.422	0.398	0.487	0.566	9	0.43719	0.54452	0.55118	8	4	7	0.582367	7.27378e-05	15
Q14527	HLTF	Helicase-like transcription factor	Helicase-like transcription factor OS=Homo sapiens GN=HLTF PE=1 SV=2 - [HLTF_HUMAN]	1009	113.9	0.393	0.225	0.293	0.29	0.331	14	0.19556	0.24486	0.24988	15	21	16	0.214641	3.31803e-05	33
Q96FF9	CDCA5	Sororin	Sororin OS=Homo sapiens GN=CDCA5 PE=1 SV=1 - [CDCA5_HUMAN]	252	27.6	0.753	0.483	0.564	0.563	0.638	4	0.3572	0.48227	0.61767	5	6	3	0.543367	0.000121484	7
Q96EU6	RRP36	Ribosomal RNA processing protein 36 homolog	Ribosomal RNA processing protein 36 homolog OS=Homo sapiens GN=RRP36 PE=1 SV=1 - [RRP36_HUMAN]	259	29.8	0.541	0.702	0.466	0.469	0.753	4	0.43642	0.34772	NaN	1	2	1	0.61132	0.000106335	4
F5H647	TAF1C		TATA box-binding protein-associated factor RNA polymerase I subunit C OS=Homo sapiens GN=TAF1C PE=2 SV=1 - [F5H647_HUMAN]	776	85	0.736	0.718	0.473	0.417	0.534	2	0.75807	0.74437	NaN	1	3	0	0.517632	5.73116e-05	4
O00488	ZNF593	Zinc finger protein 593	Zinc finger protein 593 OS=Homo sapiens GN=ZNF593 PE=1 SV=2 - [ZN593_HUMAN]	134	15.2	0.775	0.785	0.485	0.545	0.693	3	0.51853	0.50525	0.84375	1	3	2	0.920188	0.278875	4
E7EQZ4	SMN1		Survival motor neuron protein OS=Homo sapiens GN=SMN1 PE=2 SV=1 - [E7EQZ4_HUMAN]	294	31.7	0.835	0.55	0.428	0.424	0.522	8	NaN	NaN	NaN	NaN	NaN	NaN	0.25349	7.27378e-05	7
O43159	RRP8	Ribosomal RNA-processing protein 8	Ribosomal RNA-processing protein 8 OS=Homo sapiens GN=RRP8 PE=1 SV=2 - [RRP8_HUMAN]	456	50.7	0.931	0.605	0.526	0.497	0.537	3	0.60659	0.50261	0.56026	2	4	3	0.615572	7.66803e-05	8
P02792	FTL	Ferritin light chain	Ferritin light chain OS=Homo sapiens GN=FTL PE=1 SV=2 - [FRIL_HUMAN]	175	20	1.033	0.597	0.229	0.203	0.265	3	0.91778	1.73	0.8912	2	2	2	1.14076	0.0624572	2
O75764	TCEA3	Transcription elongation factor A protein 3	Transcription elongation factor A protein 3 OS=Homo sapiens GN=TCEA3 PE=2 SV=2 - [TCEA3_HUMAN]	348	38.9	1.014	0.717	0.583	0.43	0.56	9	1.0254	0.67216	NaN	4	6	2	0.732043	0.000473832	10
C9JYQ9	RPL22L1		60S ribosomal protein L22-like 1 OS=Homo sapiens GN=RPL22L1 PE=2 SV=1 - [C9JYQ9_HUMAN]	121	14.5	0.966	0.685	0.503	0.361	0.554	3	0.66603	0.5467	0.4222	2	2	2	0.566442	0.00436782	5
Q9H840	GEMIN7	Gem-associated protein 7	Gem-associated protein 7 OS=Homo sapiens GN=GEMIN7 PE=1 SV=1 - [GEMI7_HUMAN]	131	14.5	0.959	0.766	0.564	0.475	0.642	2	0.67192	1.686	0.57178	1	2	1	NaN	NaN	NaN
F8VYH9	CDK4		Cyclin-dependent kinase 4 (Fragment) OS=Homo sapiens GN=CDK4 PE=2 SV=1 - [F8VYH9_HUMAN]	170	18.7	0.757	0.711	0.337	0.352	0.93	3	0.30233	NaN	0.76773	3	0	2	0.812252	0.00532453	2
E9PMQ0	MYB		Transcriptional activator Myb OS=Homo sapiens GN=MYB PE=2 SV=1 - [E9PMQ0_HUMAN]	299	34.7	0.806	0.561	0.23	0.247	0.794	3	NaN	NaN	NaN	NaN	NaN	NaN	0.558644	0.000122555	6
P41440	SLC19A1	Folate transporter 1	Folate transporter 1 OS=Homo sapiens GN=SLC19A1 PE=1 SV=3 - [S19A1_HUMAN]	591	64.8	0.871	0.8	0.479	0.514	0.906	3	NaN	NaN	NaN	1	0	0	0.697372	0.000369373	3
A6NMY3	ALMS1		Alstrom syndrome protein 1 OS=Homo sapiens GN=ALMS1 PE=2 SV=1 - [A6NMY3_HUMAN]	2561	279	0.8	0.723	0.531	0.447	0.868	2	NaN	NaN	NaN	1	0	0	0.678302	0.000131229	4
B4DL05	SHQ1		Protein SHQ1 homolog OS=Homo sapiens GN=SHQ1 PE=2 SV=1 - [B4DL05_HUMAN]	549	61.5	0.828	0.715	0.404	0.33	0.789	2	0.44367	NaN	NaN	1	0	1	0.76313	0.000986153	3
O95625	ZBTB11	Zinc finger and BTB domain-containing protein 11	Zinc finger and BTB domain-containing protein 11 OS=Homo sapiens GN=ZBTB11 PE=1 SV=2 - [ZBT11_HUMAN]	1053	119.3	0.851	0.797	0.557	0.479	0.859	4	NaN	NaN	NaN	0	1	1	0.641713	7.01019e-05	10
E7EU24	CBFA2T3		Protein CBFA2T3 OS=Homo sapiens GN=CBFA2T3 PE=2 SV=2 - [E7EU24_HUMAN]	615	66.9	0.89	0.574	0.28	0.229	0.702	2	1.116	NaN	NaN	1	0	0	0.558644	0.00176182	2
P56270	MAZ	Myc-associated zinc finger protein	Myc-associated zinc finger protein OS=Homo sapiens GN=MAZ PE=1 SV=1 - [MAZ_HUMAN]	477	48.6	1.006	0.726	0.459	0.443	0.847	5	0.7504	NaN	NaN	1	1	1	0.870551	0.00787087	6
P30825	SLC7A1	High affinity cationic amino acid transporter 1	High affinity cationic amino acid transporter 1 OS=Homo sapiens GN=SLC7A1 PE=1 SV=1 - [CTR1_HUMAN]	629	67.6	1.023	0.841	0.552	0.487	0.808	2	1.6766	1.0997	0.61541	2	2	1	0.628507	5.02827e-05	8
Q9Y605	MRFAP1	MORF4 family-associated protein 1	MORF4 family-associated protein 1 OS=Homo sapiens GN=MRFAP1 PE=1 SV=1 - [MOFA1_HUMAN]	127	14.6	1.005	0.792	0.499	0.428	0.791	3	0.43869	NaN	NaN	2	1	0	NaN	NaN	NaN
Q9P0U3	SENP1	Sentrin-specific protease 1	Sentrin-specific protease 1 OS=Homo sapiens GN=SENP1 PE=1 SV=2 - [SENP1_HUMAN]	644	73.4	0.964	0.782	0.58	0.432	0.843	2	0.75465	0.303	NaN	3	6	1	0.692555	0.00108198	11
Q1ED39	KNOP1	Lysine-rich nucleolar protein 1	Lysine-rich nucleolar protein 1 OS=Homo sapiens GN=KNOP1 PE=1 SV=1 - [KNOP1_HUMAN]	458	51.6	0.845	0.771	0.474	0.402	0.648	2	0.54278	0.44219	0.50907	6	2	3	NaN	NaN	NaN
P78316	NOP14	Nucleolar protein 14	Nucleolar protein 14 OS=Homo sapiens GN=NOP14 PE=1 SV=3 - [NOP14_HUMAN]	857	97.6	0.87	0.798	0.623	0.493	0.748	14	0.44324	0.56537	0.58045	17	12	13	0.473029	1.62295e-05	24
Q9H9L3	ISG20L2	Interferon-stimulated 20 kDa exonuclease-like 2	Interferon-stimulated 20 kDa exonuclease-like 2 OS=Homo sapiens GN=ISG20L2 PE=1 SV=1 - [I20L2_HUMAN]	353	39.1	0.867	0.693	0.513	0.394	0.74	2	0.43165	0.43105	0.64117	2	1	1	0.570382	0.000209215	2
P18846	ATF1	Cyclic AMP-dependent transcription factor ATF-1	Cyclic AMP-dependent transcription factor ATF-1 OS=Homo sapiens GN=ATF1 PE=1 SV=2 - [ATF1_HUMAN]	271	29.2	0.792	0.656	0.479	0.41	0.609	2	NaN	0.88392	NaN	1	1	0	0.913831	0.15962	2
Q5QJE6	DNTTIP2	Deoxynucleotidyltransferase terminal-interacting protein 2	Deoxynucleotidyltransferase terminal-interacting protein 2 OS=Homo sapiens GN=DNTTIP2 PE=1 SV=2 - [TDIF2_HUMAN]	756	84.4	0.776	0.668	0.514	0.448	0.679	16	0.51127	0.56496	0.59466	8	9	5	0.456916	4.86549e-05	16
Q9BVJ6	UTP14A	U3 small nucleolar RNA-associated protein 14 homolog A	U3 small nucleolar RNA-associated protein 14 homolog A OS=Homo sapiens GN=UTP14A PE=1 SV=1 - [UT14A_HUMAN]	771	87.9	0.799	0.673	0.549	0.431	0.655	25	0.46965	0.58724	0.55858	14	15	13	0.463294	2.87225e-05	25
Q9UMY1	NOL7	Nucleolar protein 7	Nucleolar protein 7 OS=Homo sapiens GN=NOL7 PE=1 SV=2 - [NOL7_HUMAN]	257	29.4	0.783	0.707	0.507	0.414	0.685	5	0.50711	0.66226	0.55169	2	3	2	0.582367	4.45724e-05	9
Q9Y3A2	UTP11L	Probable U3 small nucleolar RNA-associated protein 11	Probable U3 small nucleolar RNA-associated protein 11 OS=Homo sapiens GN=UTP11L PE=1 SV=2 - [UTP11_HUMAN]	253	30.4	0.744	0.654	0.532	0.464	0.63	9	0.42587	0.50845	0.59554	3	2	3	0.482968	0.00136568	9
Q01664	TFAP4	Transcription factor AP-4	Transcription factor AP-4 OS=Homo sapiens GN=TFAP4 PE=1 SV=2 - [TFAP4_HUMAN]	338	38.7	0.754	0.487	0.229	0.235	0.585	2	0.34276	0.64211	0.33032	3	1	1	0.435275	2.87276e-05	6
Q9BXK1	KLF16	Krueppel-like factor 16	Krueppel-like factor 16 OS=Homo sapiens GN=KLF16 PE=1 SV=1 - [KLF16_HUMAN]	252	25.4	0.814	0.571	0.345	0.312	0.685	2	0.43317	0.65082	0.57963	1	1	1	0.779165	0.001539	2
Q8N0T1	C8orf59	Uncharacterized protein C8orf59	Uncharacterized protein C8orf59 OS=Homo sapiens GN=C8orf59 PE=1 SV=3 - [CH059_HUMAN]	98	11.2	0.961	0.714	0.421	0.38	0.667	3	NaN	NaN	NaN	NaN	NaN	NaN	1.18921	0.194424	1
Q9NWZ8	GEMIN8	Gem-associated protein 8	Gem-associated protein 8 OS=Homo sapiens GN=GEMIN8 PE=1 SV=1 - [GEMI8_HUMAN]	242	28.6	0.925	0.648	0.377	0.315	0.596	3	NaN	NaN	NaN	0	0	0	0.208772	5.4396e-06	3
Q9Y4B6	VPRBP	Protein VPRBP	Protein VPRBP OS=Homo sapiens GN=VPRBP PE=1 SV=3 - [VPRBP_HUMAN]	1507	168.9	0.852	0.379	0.143	0.138	0.365	7	0.30372	0.28062	0.17565	8	8	6	0.373712	7.52497e-06	26
P78549	NTHL1	Endonuclease III-like protein 1	Endonuclease III-like protein 1 OS=Homo sapiens GN=NTHL1 PE=1 SV=2 - [NTHL1_HUMAN]	312	34.4	0.912	0.871	0.66	0.499	0.709	3	0.68807	0.81021	0.37568	3	3	3	0.716978	0.000653657	5
O75691	UTP20	Small subunit processome component 20 homolog	Small subunit processome component 20 homolog OS=Homo sapiens GN=UTP20 PE=1 SV=3 - [UTP20_HUMAN]	2785	318.2	0.987	0.84	0.606	0.466	0.709	30	0.71362	0.6016	0.61903	16	14	11	0.547147	3.71209e-05	57
Q96C36	PYCR2	Pyrroline-5-carboxylate reductase 2	Pyrroline-5-carboxylate reductase 2 OS=Homo sapiens GN=PYCR2 PE=1 SV=1 - [P5CR2_HUMAN]	320	33.6	1.002	0.878	0.596	0.446	0.71	8	1.1296	0.8469	1.1465	4	5	4	0.742262	0.000570946	8
Q13395	TARBP1	Probable methyltransferase TARBP1	Probable methyltransferase TARBP1 OS=Homo sapiens GN=TARBP1 PE=1 SV=1 - [TARB1_HUMAN]	1621	181.6	1.012	0.921	0.576	0.491	0.712	2	0.48152	0.22035	0.94202	3	2	1	0.668964	0.000233888	18
P15814	IGLL1	Immunoglobulin lambda-like polypeptide 1	Immunoglobulin lambda-like polypeptide 1 OS=Homo sapiens GN=IGLL1 PE=1 SV=1 - [IGLL1_HUMAN]	213	22.9	0.975	0.895	0.562	0.438	0.835	3	0.41655	0.27215	0.21427	2	3	2	0.528509	6.18386e-05	4
Q68CQ4	DIEXF	Digestive organ expansion factor homolog	Digestive organ expansion factor homolog OS=Homo sapiens GN=DIEXF PE=1 SV=2 - [DIEXF_HUMAN]	756	87	0.938	0.906	0.492	0.424	0.813	6	0.69687	NaN	0.7453	5	0	7	0.547147	7.85033e-05	12
Q99595	TIMM17A	Mitochondrial import inner membrane translocase subunit Tim17-A	Mitochondrial import inner membrane translocase subunit Tim17-A OS=Homo sapiens GN=TIMM17A PE=1 SV=1 - [TI17A_HUMAN]	171	18	0.895	0.822	0.319	0.297	0.67	2	NaN	NaN	NaN	NaN	NaN	NaN	0.920188	0.161191	1
Q96P11	NSUN5	Putative methyltransferase NSUN5	Putative methyltransferase NSUN5 OS=Homo sapiens GN=NSUN5 PE=1 SV=2 - [NSUN5_HUMAN]	429	46.7	0.923	0.939	0.55	0.455	0.754	8	0.72724	0.72336	0.6073	8	10	13	0.712025	0.000232909	15
Q92667	AKAP1	A-kinase anchor protein 1, mitochondrial	A-kinase anchor protein 1, mitochondrial OS=Homo sapiens GN=AKAP1 PE=1 SV=1 - [AKAP1_HUMAN]	903	97.3	0.858	0.866	0.628	0.496	0.812	6	0.6001	0.65284	0.76006	9	3	3	0.697372	0.000607351	15
Q5T3I0	GPATCH4	G patch domain-containing protein 4	G patch domain-containing protein 4 OS=Homo sapiens GN=GPATCH4 PE=1 SV=2 - [GPTC4_HUMAN]	446	50.4	0.812	0.883	0.493	0.356	0.69	7	NaN	0.4578	0.37451	4	5	2	0.469761	2.84553e-05	12
Q9NV06	DCAF13	DDB1- and CUL4-associated factor 13	DDB1- and CUL4-associated factor 13 OS=Homo sapiens GN=DCAF13 PE=1 SV=2 - [DCA13_HUMAN]	445	51.4	0.889	0.897	0.636	0.475	0.773	14	0.76672	0.69095	0.79747	10	5	5	0.668964	6.58478e-05	16
D6RHD2	SPRY1		Protein sprouty homolog 1 (Fragment) OS=Homo sapiens GN=SPRY1 PE=2 SV=1 - [D6RHD2_HUMAN]	209	22.9	0.884	0.663	0.478	0.676	0.785	3	0.44958	NaN	NaN	1	1	0	0.721965	9.46194e-05	5
Q8N0Y2	ZNF444	Zinc finger protein 444	Zinc finger protein 444 OS=Homo sapiens GN=ZNF444 PE=1 SV=1 - [ZN444_HUMAN]	327	35.2	0.738	0.578	0.331	0.597	0.721	2	NaN	NaN	NaN	NaN	NaN	NaN	NaN	NaN	NaN
P14921	ETS1	Protein C-ets-1	Protein C-ets-1 OS=Homo sapiens GN=ETS1 PE=1 SV=1 - [ETS1_HUMAN]	441	50.4	0.788	0.773	0.498	0.584	0.853	5	0.72891	1.3493	1.1207	1	2	2	0.63728	0.000156638	13
Q8NDF8	PAPD5	PAP-associated domain-containing protein 5	PAP-associated domain-containing protein 5 OS=Homo sapiens GN=PAPD5 PE=1 SV=2 - [PAPD5_HUMAN]	572	63.2	0.963	0.745	0.49	0.66	0.88	2	0.32828	0.41771	0.53346	1	2	1	0.574349	5.73116e-05	4
Q9NPF0	CD320	CD320 antigen	CD320 antigen OS=Homo sapiens GN=CD320 PE=1 SV=1 - [CD320_HUMAN]	282	29	0.978	0.811	0.374	0.526	0.881	3	1.0046	0.64632	0.70061	2	2	3	0.812252	0.0268107	3

## Sheet: Cluster #3
Gene of interest						Exp. 1: TMT time course						Exp. 2: SILAC validation time course						Exp. 3: TMT single timepoint
Accession	Gene name	Protein name	Description	# AAs	MW [kDa]	6 h	24 h	48 h	72 h	RTi	UniPeps	24 h	48 h	72 h	UniPeps 24 h	UniPeps 48 h	UniPeps 72 h	48 h	q-value	UniPeps
O14530	TXNDC9	Thioredoxin domain-containing protein 9	Thioredoxin domain-containing protein 9 OS=Homo sapiens GN=TXNDC9 PE=1 SV=2 - [TXND9_HUMAN]	226	26.5	1.595	1.446	2.3	2.408	0.817	2	NaN	NaN	0.95157	2	1	3	1.21419	0.0279064	5
J3KPY9	ANTXR2		Anthrax toxin receptor 2 OS=Homo sapiens GN=ANTXR2 PE=4 SV=1 - [J3KPY9_HUMAN]	411	44.8	0.903	1.346	1.361	2.25	1.043	2	NaN	1.6525	2.5372	0	1	1	1.07177	0.261315	7
F5H4I5	ITM2C		Integral membrane protein 2C (Fragment) OS=Homo sapiens GN=ITM2C PE=2 SV=1 - [F5H4I5_HUMAN]	122	14.2	1.073	1.518	1.668	2.386	0.905	2	NaN	NaN	NaN	1	1	1	2.62079	7.01019e-05	6
P13747	HLA-E	HLA class I histocompatibility antigen, alpha chain E	HLA class I histocompatibility antigen, alpha chain E OS=Homo sapiens GN=HLA-E PE=1 SV=3 - [HLAE_HUMAN]	358	40.1	1.159	1.181	1.413	2.027	0.879	2	1.236	1.6637	2.4684	2	4	2	1.20581	0.00316192	9
P14635	CCNB1	G2/mitotic-specific cyclin-B1	G2/mitotic-specific cyclin-B1 OS=Homo sapiens GN=CCNB1 PE=1 SV=1 - [CCNB1_HUMAN]	433	48.3	1.243	1.535	2.341	2.313	1.234	10	2.177	2.59	3.7029	5	5	3	2.65737	2.14798e-05	12
P53350	PLK1	Serine/threonine-protein kinase PLK1	Serine/threonine-protein kinase PLK1 OS=Homo sapiens GN=PLK1 PE=1 SV=1 - [PLK1_HUMAN]	603	68.2	1.192	1.796	2.804	2.971	1.21	16	2.5129	2.7146	3.2071	9	10	12	2.96905	7.52497e-06	24
F8W9B5	PRC1		Protein regulator of cytokinesis 1 OS=Homo sapiens GN=PRC1 PE=2 SV=1 - [F8W9B5_HUMAN]	566	66.1	1.114	1.658	2.931	3.262	1.137	15	2.1884	1.7752	1.858	5	8	8	2.25012	2.14798e-05	24
E9PD90	CKAP2		Cytoskeleton-associated protein 2 OS=Homo sapiens GN=CKAP2 PE=2 SV=1 - [E9PD90_HUMAN]	634	71.2	1.09	1.386	2.501	3.085	1.204	16	1.508	1.5395	2.1963	7	3	7	2.14355	1.48893e-05	23
P52732	KIF11	Kinesin-like protein KIF11	Kinesin-like protein KIF11 OS=Homo sapiens GN=KIF11 PE=1 SV=2 - [KIF11_HUMAN]	1056	119.1	1.115	1.46	2.202	2.53	1.244	43	1.5195	1.5915	1.891	20	29	28	1.86607	4.65445e-05	54
O75330	HMMR	Hyaluronan mediated motility receptor	Hyaluronan mediated motility receptor OS=Homo sapiens GN=HMMR PE=1 SV=2 - [HMMR_HUMAN]	724	84	1.018	1.941	4.081	4.072	1.435	22	2.2303	2.7829	2.9837	10	9	14	3.22657	8.34364e-06	38
Q9Y6A5	TACC3	Transforming acidic coiled-coil-containing protein 3	Transforming acidic coiled-coil-containing protein 3 OS=Homo sapiens GN=TACC3 PE=1 SV=1 - [TACC3_HUMAN]	838	90.3	1.005	1.434	2.463	2.517	1.294	23	1.5029	1.5866	1.8132	10	12	13	2.20381	2.14798e-05	28
Q9UH62	ARMCX3	Armadillo repeat-containing X-linked protein 3	Armadillo repeat-containing X-linked protein 3 OS=Homo sapiens GN=ARMCX3 PE=1 SV=1 - [ARMX3_HUMAN]	379	42.5	0.984	1.221	1.72	2.001	1.196	6	1.5113	2.6395	2.6254	4	4	6	1.81504	7.20045e-05	7
P48200	IREB2	Iron-responsive element-binding protein 2	Iron-responsive element-binding protein 2 OS=Homo sapiens GN=IREB2 PE=1 SV=3 - [IREB2_HUMAN]	963	105	0.939	1.641	2.109	2.185	1.537	7	0.65605	NaN	0.82248	2	1	4	1.09429	0.0573029	17
Q96HE9	PRR11	Proline-rich protein 11	Proline-rich protein 11 OS=Homo sapiens GN=PRR11 PE=1 SV=1 - [PRR11_HUMAN]	360	40.1	1.047	1.683	2.344	2.034	1.557	3	1.5592	2.4033	2.8799	2	1	2	2.26577	6.14104e-05	5
O14965	AURKA	Aurora kinase A	Aurora kinase A OS=Homo sapiens GN=AURKA PE=1 SV=2 - [AURKA_HUMAN]	403	45.8	1.121	1.727	2.304	2.303	1.349	8	1.6148	1.6442	1.8407	4	5	7	1.98618	2.22668e-05	12
Q9NQW6	ANLN	Actin-binding protein anillin	Actin-binding protein anillin OS=Homo sapiens GN=ANLN PE=1 SV=2 - [ANLN_HUMAN]	1124	124.1	1.142	1.823	2.217	2.407	1.415	18	1.4456	2.169	1.7775	6	5	11	2.36199	8.55385e-06	39
Q562F6	SGOL2	Shugoshin-like 2	Shugoshin-like 2 OS=Homo sapiens GN=SGOL2 PE=1 SV=2 - [SGOL2_HUMAN]	1265	144.6	1.05	1.917	3.056	2.729	1.328	10	1.7381	1.4824	2.0016	11	5	9	2.26577	4.69548e-05	22
Q8IYA6	CKAP2L	Cytoskeleton-associated protein 2-like	Cytoskeleton-associated protein 2-like OS=Homo sapiens GN=CKAP2L PE=1 SV=4 - [CKP2L_HUMAN]	745	83.5	1.118	1.682	2.35	2.029	1.271	7	1.9745	1.697	1.9191	5	7	7	1.76541	0.00032234	16
Q99618	CDCA3	Cell division cycle-associated protein 3	Cell division cycle-associated protein 3 OS=Homo sapiens GN=CDCA3 PE=1 SV=1 - [CDCA3_HUMAN]	268	29	1.007	1.797	2.021	1.889	1.321	10	1.4494	1.6115	1.8238	5	4	5	2.18859	4.69088e-05	9
B4DGU4	CTNNB1		Catenin beta-1 OS=Homo sapiens GN=CTNNB1 PE=2 SV=1 - [B4DGU4_HUMAN]	774	84.7	1.042	1.367	3.224	3.299	1.054	4	1.222	3.7185	3.8682	2	3	1	1.69349	0.00024693	14
P37268	FDFT1	Squalene synthase	Squalene synthase OS=Homo sapiens GN=FDFT1 PE=1 SV=1 - [FDFT_HUMAN]	417	48.1	1.028	1.311	2.093	2.082	0.967	15	1.1105	1.1354	0.98338	11	16	14	1.11729	0.0151476	17
Q01581	HMGCS1	Hydroxymethylglutaryl-CoA synthase, cytoplasmic	Hydroxymethylglutaryl-CoA synthase, cytoplasmic OS=Homo sapiens GN=HMGCS1 PE=1 SV=2 - [HMCS1_HUMAN]	520	57.3	1.019	1.431	3.407	2.75	0.864	22	1.0035	1.4879	0.77608	12	14	13	1.47427	0.000653657	28
Q00537	CDK17	Cyclin-dependent kinase 17	Cyclin-dependent kinase 17 OS=Homo sapiens GN=CDK17 PE=1 SV=2 - [CDK17_HUMAN]	523	59.5	0.898	1.408	2.283	3.153	1.012	4	NaN	2.6255	3.1825	0	2	1	2.01391	0.000104871	9
Q13907	IDI1	Isopentenyl-diphosphate Delta-isomerase 1	Isopentenyl-diphosphate Delta-isomerase 1 OS=Homo sapiens GN=IDI1 PE=1 SV=2 - [IDI1_HUMAN]	227	26.3	1.003	1.094	2.005	2.088	1.043	5	1.2371	1.3911	1.2303	5	6	4	1.56917	0.000128731	13
P56937	HSD17B7	3-keto-steroid reductase	3-keto-steroid reductase OS=Homo sapiens GN=HSD17B7 PE=1 SV=1 - [DHB7_HUMAN]	341	38.2	1.026	1.171	2.125	2.705	1.076	3	1.1958	1.6303	2.7739	2	3	2	1.68179	0.00016606	9
Q9NYZ3	GTSE1	G2 and S phase-expressed protein 1	G2 and S phase-expressed protein 1 OS=Homo sapiens GN=GTSE1 PE=1 SV=3 - [GTSE1_HUMAN]	720	76.6	1.019	1.059	1.762	2.032	1.025	8	1.0443	1.2506	1.0215	5	2	2	1.47427	0.00011844	13
P11388	TOP2A	DNA topoisomerase 2-alpha	DNA topoisomerase 2-alpha OS=Homo sapiens GN=TOP2A PE=1 SV=3 - [TOP2A_HUMAN]	1531	174.3	1.08	1.096	1.801	2.037	0.927	45	1.1677	1.3801	1.5675	34	31	35	1.90528	3.44504e-05	57
Q9Y3D2	MSRB2	Methionine-R-sulfoxide reductase B2, mitochondrial	Methionine-R-sulfoxide reductase B2, mitochondrial OS=Homo sapiens GN=MSRB2 PE=2 SV=2 - [MSRB2_HUMAN]	182	19.5	0.979	1.138	1.926	2.215	0.898	3	1.2021	NaN	0.42397	2	1	2	1.7411	7.32716e-05	7
Q9H4H8	FAM83D	Protein FAM83D	Protein FAM83D OS=Homo sapiens GN=FAM83D PE=1 SV=3 - [FA83D_HUMAN]	585	64.4	1.095	1.154	1.836	2.632	1.087	4	NaN	1.8339	2.5751	0	2	4	2.18859	2.08554e-05	8

## Sheet: Cluster #4
Gene of interest						Exp. 1: TMT time course						Exp. 2: SILAC validation time course						Exp. 3: TMT single timepoint
Accession	Gene name	Protein name	Description	# AAs	MW [kDa]	6 h	24 h	48 h	72 h	RTi	UniPeps	24 h	48 h	72 h	UniPeps 24 h	UniPeps 48 h	UniPeps 72 h	48 h	q-value	UniPeps
P23229	ITGA6	Integrin alpha-6;Integrin alpha-6 heavy chain;Integrin alpha-6 light chain	Integrin alpha-6 OS=Homo sapiens GN=ITGA6 PE=1 SV=5 - [ITA6_HUMAN]	1130	126.5	1.083	1.711	1.408	1.761	2.533	7	2.0068	NaN	0.75855	3	1	1	1.31039	0.00335154	16
P12544	GZMA	Granzyme A	Granzyme A OS=Homo sapiens GN=GZMA PE=1 SV=2 - [GRAA_HUMAN]	262	29	1.058	2.248	1.808	1.861	2.318	5	1.5151	2.5441	3.8151	3	4	2	2.90795	4.69088e-05	11
Q13015	MLLT11	Protein AF1q	Protein AF1q OS=Homo sapiens GN=MLLT11 PE=1 SV=1 - [AF1Q_HUMAN]	90	10.1	1.056	2.489	1.775	1.696	2.721	3	NaN	NaN	NaN	NaN	NaN	NaN	2.2974	5.81535e-05	6
O43719	HTATSF1	HIV Tat-specific factor 1	HIV Tat-specific factor 1 OS=Homo sapiens GN=HTATSF1 PE=1 SV=1 - [HTSF1_HUMAN]	755	85.8	1.002	1.348	1.52	1.403	2.03	27	1.1127	1.2981	1.2199	14	19	21	1.16473	0.00254625	29
Q9UBL0	ARPP21	cAMP-regulated phosphoprotein 21	cAMP-regulated phosphoprotein 21 OS=Homo sapiens GN=ARPP21 PE=1 SV=2 - [ARP21_HUMAN]	812	89.1	0.938	1.421	1.562	1.35	2.069	5	1.5062	1.5098	NaN	1	1	0	1.81504	5.02827e-05	8
Q96B54	ZNF428	Zinc finger protein 428	Zinc finger protein 428 OS=Homo sapiens GN=ZNF428 PE=1 SV=2 - [ZN428_HUMAN]	188	20.5	0.882	1.476	1.335	1.18	2.031	4	1.0521	1.8558	1.5087	3	4	4	NaN	NaN	NaN
Q96CX6	LRRC58	Leucine-rich repeat-containing protein 58	Leucine-rich repeat-containing protein 58 OS=Homo sapiens GN=LRRC58 PE=1 SV=2 - [LRC58_HUMAN]	371	40.6	1.478	1.675	1.982	1.613	4.03	2	0.34661	NaN	0.86765	2	1	2	NaN	NaN	NaN
P42898	MTHFR	Methylenetetrahydrofolate reductase	Methylenetetrahydrofolate reductase OS=Homo sapiens GN=MTHFR PE=1 SV=3 - [MTHR_HUMAN]	656	74.5	1.215	1.305	2.573	1.666	2.246	3	NaN	NaN	0.81826	0	0	1	1.39474	0.000281467	13
O14907	TAX1BP3	Tax1-binding protein 3	Tax1-binding protein 3 OS=Homo sapiens GN=TAX1BP3 PE=1 SV=2 - [TX1B3_HUMAN]	124	13.7	0.993	1.396	1.895	1.623	2.194	2	NaN	1.4848	1.6048	1	1	2	1.6245	0.00759132	2
Q9UKE5	TNIK	TRAF2 and NCK-interacting protein kinase	TRAF2 and NCK-interacting protein kinase OS=Homo sapiens GN=TNIK PE=1 SV=1 - [TNIK_HUMAN]	1360	154.8	1.029	1.616	3.22	1.754	3.168	3	1.6966	NaN	3.9529	3	0	2	1.55833	0.000299871	13
F5H1A8	GSN		Gelsolin OS=Homo sapiens GN=GSN PE=2 SV=1 - [F5H1A8_HUMAN]	739	81.4	1.003	1.046	1.421	2.157	1.993	7	1.6326	2.5052	3.4174	2	3	3	1.25701	0.141306	13
E9PHN6	GSTM2		Glutathione S-transferase Mu 2 OS=Homo sapiens GN=GSTM2 PE=2 SV=1 - [E9PHN6_HUMAN]	193	22.9	1.047	1.088	1.847	2.147	1.913	8	1.2694	1.9527	2.1574	2	3	3	2	2.66654e-05	9
Q9NY65	TUBA8	Tubulin alpha-8 chain	Tubulin alpha-8 chain OS=Homo sapiens GN=TUBA8 PE=1 SV=1 - [TBA8_HUMAN]	449	50.1	1.191	1.037	1.639	2.013	1.743	2	NaN	NaN	NaN	NaN	NaN	NaN	3.34035	0.000121598	1
P37235	HPCAL1	Hippocalcin-like protein 1	Hippocalcin-like protein 1 OS=Homo sapiens GN=HPCAL1 PE=1 SV=3 - [HPCL1_HUMAN]	193	22.3	1.021	1.323	1.518	1.846	2.278	4	NaN	NaN	NaN	NaN	NaN	NaN	1.56917	0.00042758	6
P48960	CD97	CD97 antigen;CD97 antigen subunit alpha;CD97 antigen subunit beta	CD97 antigen OS=Homo sapiens GN=CD97 PE=1 SV=4 - [CD97_HUMAN]	835	91.8	0.905	1.512	1.759	1.802	2.105	3	NaN	2.6213	NaN	0	1	0	NaN	NaN	NaN
O00754	MAN2B1	Lysosomal alpha-mannosidase;Lysosomal alpha-mannosidase A peptide;Lysosomal alpha-mannosidase B peptide;Lysosomal alpha-mannosidase C peptide;Lysosomal alpha-mannosidase D peptide;Lysosomal alpha-mannosidase E peptide	Lysosomal alpha-mannosidase OS=Homo sapiens GN=MAN2B1 PE=1 SV=3 - [MA2B1_HUMAN]	1011	113.7	0.95	1.35	1.648	2.048	1.696	7	NaN	NaN	1.705	0	1	3	1.37554	0.000420616	15
H0YJ34	FERMT2		Fermitin family homolog 2 (Fragment) OS=Homo sapiens GN=FERMT2 PE=2 SV=1 - [H0YJ34_HUMAN]	640	73.3	1.036	1.215	1.664	2.291	1.761	7	1.0269	1.0538	1.924	3	2	5	1.50525	0.000189785	25
P50749	RASSF2	Ras association domain-containing protein 2	Ras association domain-containing protein 2 OS=Homo sapiens GN=RASSF2 PE=1 SV=1 - [RASF2_HUMAN]	326	37.8	1.02	1.329	1.651	2.322	2.009	5	3.1081	0.75745	2.4266	1	3	2	1.40444	0.00417016	8
A6NHX0	GATSL2	GATS-like protein 2	GATS-like protein 2 OS=Homo sapiens GN=GATSL2 PE=2 SV=3 - [GATL2_HUMAN]	329	36	1.084	1.669	2.063	2.161	2.279	3	NaN	NaN	NaN	NaN	NaN	NaN	NaN	NaN	NaN
Q04828	AKR1C1	Aldo-keto reductase family 1 member C1	Aldo-keto reductase family 1 member C1 OS=Homo sapiens GN=AKR1C1 PE=1 SV=1 - [AK1C1_HUMAN]	323	36.8	1.044	1.999	2.895	2.815	3.231	3	NaN	NaN	NaN	NaN	NaN	NaN	NaN	NaN	NaN
J3QQN7	GDPD1		Glycerophosphodiester phosphodiesterase domain-containing protein 1 OS=Homo sapiens GN=GDPD1 PE=4 SV=1 - [J3QQN7_HUMAN]	210	23.9	1.042	1.555	1.787	2.234	2.047	2	0.69569	NaN	NaN	2	0	1	1.81504	6.12886e-05	5
Q08AF3	SLFN5	Schlafen family member 5	Schlafen family member 5 OS=Homo sapiens GN=SLFN5 PE=1 SV=1 - [SLFN5_HUMAN]	891	101	1.109	2.134	3.829	4.726	4.208	17	1.6352	4.2409	2.9399	4	5	6	1.89212	4.18721e-05	17
Q7Z3T8	ZFYVE16	Zinc finger FYVE domain-containing protein 16	Zinc finger FYVE domain-containing protein 16 OS=Homo sapiens GN=ZFYVE16 PE=1 SV=3 - [ZFY16_HUMAN]	1539	168.8	1.019	1.471	1.928	2.136	1.881	2	1.2506	1.7672	2.6372	2	4	2	1.40444	0.000760238	13
Q53FA7	TP53I3	Quinone oxidoreductase PIG3	Quinone oxidoreductase PIG3 OS=Homo sapiens GN=TP53I3 PE=1 SV=2 - [QORX_HUMAN]	332	35.5	0.971	1.534	2.073	2.427	2.32	5	1.4968	1.5229	1.6834	3	2	2	1.79005	3.6056e-05	9
Q7L266	ASRGL1	Isoaspartyl peptidase/L-asparaginase;Isoaspartyl peptidase/L-asparaginase alpha chain;Isoaspartyl peptidase/L-asparaginase beta chain	Isoaspartyl peptidase/L-asparaginase OS=Homo sapiens GN=ASRGL1 PE=1 SV=2 - [ASGL1_HUMAN]	308	32	0.962	1.457	1.781	2.07	2.21	4	0.77565	1.3901	1.2764	3	7	4	1.36604	0.00119533	11
P40121	CAPG	Macrophage-capping protein	Macrophage-capping protein OS=Homo sapiens GN=CAPG PE=1 SV=2 - [CAPG_HUMAN]	348	38.5	1.027	1.735	3.191	4.2	4.495	11	2.0452	4.4978	3.5128	6	7	5	2.75108	2.14798e-05	10
Q9NZ08	ERAP1	Endoplasmic reticulum aminopeptidase 1	Endoplasmic reticulum aminopeptidase 1 OS=Homo sapiens GN=ERAP1 PE=1 SV=3 - [ERAP1_HUMAN]	941	107.2	0.976	1.301	1.836	2.13	1.998	27	1.169	2.505	2.0391	16	22	19	1.52626	5.06184e-05	35
Q9Y696	CLIC4	Chloride intracellular channel protein 4	Chloride intracellular channel protein 4 OS=Homo sapiens GN=CLIC4 PE=1 SV=4 - [CLIC4_HUMAN]	253	28.8	1.158	1.675	2.304	2.84	3.044	2	NaN	NaN	NaN	NaN	NaN	NaN	1.10957	0.581078	8
Q86TM6	SYVN1	E3 ubiquitin-protein ligase synoviolin	E3 ubiquitin-protein ligase synoviolin OS=Homo sapiens GN=SYVN1 PE=1 SV=2 - [SYVN1_HUMAN]	617	67.6	1.268	12.994	12.307	13.624	13.143	2	NaN	NaN	1.665	2	0	1	1.25701	0.0010622	4
P42785	PRCP	Lysosomal Pro-X carboxypeptidase	Lysosomal Pro-X carboxypeptidase OS=Homo sapiens GN=PRCP PE=1 SV=1 - [PCP_HUMAN]	496	55.8	1.074	2.118	2.324	2.745	2.241	3	NaN	1.8178	NaN	1	1	1	1.58008	0.000281625	5
P78559	MAP1A	MAP1 light chain LC2;MAP1A heavy chain;Microtubule-associated protein 1A	Microtubule-associated protein 1A OS=Homo sapiens GN=MAP1A PE=1 SV=6 - [MAP1A_HUMAN]	2803	305.3	0.98	1.707	1.904	2.057	1.608	25	1.3979	1.4319	1.4244	16	15	19	1.61328	0.000115297	57
Q6NUM9	RETSAT	All-trans-retinol 13,14-reductase	All-trans-retinol 13,14-reductase OS=Homo sapiens GN=RETSAT PE=1 SV=2 - [RETST_HUMAN]	610	66.8	0.959	1.918	2.205	2.23	1.697	6	1.0231	1.2969	NaN	1	4	0	2.02792	6.18386e-05	9
Q86Y79	PTRH1	Probable peptidyl-tRNA hydrolase	Probable peptidyl-tRNA hydrolase OS=Homo sapiens GN=PTRH1 PE=1 SV=1 - [PTH_HUMAN]	214	22.9	0.95	1.938	2.301	2.449	2.033	2	NaN	NaN	NaN	NaN	NaN	NaN	1.13288	0.0115697	3
Q9UDY2	TJP2	Tight junction protein ZO-2	Tight junction protein ZO-2 OS=Homo sapiens GN=TJP2 PE=1 SV=2 - [ZO2_HUMAN]	1190	133.9	0.97	2.062	2.409	2.406	2.366	5	1.0523	2.189	2.2575	2	2	4	1.81504	2.14798e-05	10
Q9UGK3	STAP2	Signal-transducing adaptor protein 2	Signal-transducing adaptor protein 2 OS=Homo sapiens GN=STAP2 PE=1 SV=2 - [STAP2_HUMAN]	403	44.9	0.94	1.773	2.154	2.114	2.116	2	NaN	NaN	NaN	NaN	NaN	NaN	NaN	NaN	NaN
Q8TDJ6	DMXL2	DmX-like protein 2	DmX-like protein 2 OS=Homo sapiens GN=DMXL2 PE=1 SV=2 - [DMXL2_HUMAN]	3036	339.4	1.159	1.635	2.062	1.822	1.754	2	NaN	NaN	NaN	2	0	1	1.26576	0.00255412	11
P15289	ARSA	Arylsulfatase A;Arylsulfatase A component B;Arylsulfatase A component C	Arylsulfatase A OS=Homo sapiens GN=ARSA PE=1 SV=3 - [ARSA_HUMAN]	507	53.6	1.043	1.148	1.981	2.409	1.738	2	1.6589	NaN	1.3736	2	0	2	1.58008	0.000832733	5
P51580	TPMT	Thiopurine S-methyltransferase	Thiopurine S-methyltransferase OS=Homo sapiens GN=TPMT PE=1 SV=1 - [TPMT_HUMAN]	245	28.2	1.003	1.162	1.677	2.054	1.561	7	1.2663	1.5737	2.2788	3	1	3	1.29235	0.000360971	8
H7C4M9	UBE2H		Ubiquitin-conjugating enzyme E2 H (Fragment) OS=Homo sapiens GN=UBE2H PE=2 SV=1 - [H7C4M9_HUMAN]	62	7.1	0.916	1.314	1.966	2.72	1.747	2	1.5216	2.5537	NaN	1	1	0	1.64718	0.00055367	3
Q9HAN9	NMNAT1	Nicotinamide mononucleotide adenylyltransferase 1	Nicotinamide mononucleotide adenylyltransferase 1 OS=Homo sapiens GN=NMNAT1 PE=1 SV=1 - [NMNA1_HUMAN]	279	31.9	0.916	1.165	1.798	2.262	1.504	4	NaN	1.8086	NaN	0	2	0	1.69349	0.000128731	5
P18440	NAT1	Arylamine N-acetyltransferase 1	Arylamine N-acetyltransferase 1 OS=Homo sapiens GN=NAT1 PE=1 SV=2 - [ARY1_HUMAN]	290	33.9	1.051	1.291	1.679	2.09	1.323	4	1.3434	1.2869	4.7443	2	2	3	1.31039	0.00138118	4
Q9UHQ9	CYB5R1	NADH-cytochrome b5 reductase 1	NADH-cytochrome b5 reductase 1 OS=Homo sapiens GN=CYB5R1 PE=1 SV=1 - [NB5R1_HUMAN]	305	34.1	1.082	1.236	1.706	2.112	1.396	5	NaN	NaN	NaN	2	0	1	1.7411	5.65754e-05	8
P46934	NEDD4	E3 ubiquitin-protein ligase NEDD4	E3 ubiquitin-protein ligase NEDD4 OS=Homo sapiens GN=NEDD4 PE=1 SV=4 - [NEDD4_HUMAN]	1319	149	1.072	1.352	1.693	2.034	1.423	2	1.3401	NaN	0.7046	2	2	1	1.40444	0.000877508	16
S4R3N9	SFXN3		Sideroflexin-3 OS=Homo sapiens GN=SFXN3 PE=4 SV=1 - [S4R3N9_HUMAN]	177	19.6	1.097	1.458	1.773	2.212	1.37	2	1.3623	1.0402	2.2574	1	3	2	1.04247	0.631014	4
Q5SZR4	TDRKH		Tudor and KH domain containing, isoform CRA_a OS=Homo sapiens GN=TDRKH PE=2 SV=1 - [Q5SZR4_HUMAN]	557	61.5	1.083	1.418	1.894	2.065	1.49	8	1.042	1.4761	0.945	4	3	3	1.76541	3.36072e-05	14
Q96PP8	GBP5	Guanylate-binding protein 5	Guanylate-binding protein 5 OS=Homo sapiens GN=GBP5 PE=1 SV=1 - [GBP5_HUMAN]	586	66.6	1.052	1.561	1.983	2.194	1.59	14	1.5683	1.5515	1.8963	6	4	6	1.97247	3.28042e-05	15
P48736	PIK3CG	Phosphatidylinositol 4,5-bisphosphate 3-kinase catalytic subunit gamma isoform	Phosphatidylinositol 4,5-bisphosphate 3-kinase catalytic subunit gamma isoform OS=Homo sapiens GN=PIK3CG PE=1 SV=3 - [PK3CG_HUMAN]	1102	126.4	1.121	1.552	1.886	2.327	1.829	2	NaN	NaN	2.3165	1	1	3	1.3566	0.00231381	11
Q9NXU5	ARL15	ADP-ribosylation factor-like protein 15	ADP-ribosylation factor-like protein 15 OS=Homo sapiens GN=ARL15 PE=1 SV=1 - [ARL15_HUMAN]	204	22.9	1.061	1.62	2.096	2.338	1.923	2	NaN	NaN	NaN	NaN	NaN	NaN	1.91853	2.98431e-05	5
Q9Y2C4	EXOG	Nuclease EXOG, mitochondrial	Nuclease EXOG, mitochondrial OS=Homo sapiens GN=EXOG PE=1 SV=2 - [EXOG_HUMAN]	368	41.1	1.021	1.372	1.828	2.036	1.671	6	1.4353	1.5123	1.7603	3	2	2	1.31039	0.0115638	6
