# Supplementary material for: Temporal proteomic analysis of HIV infection reveals remodelling of the host phosphoproteome by lentiviral Vif variants
Source: eLife. 2016 Sep 30;5:e18296. doi: 10.7554/eLife.18296 (PMC5085607; doi:10.7554/eLife.18296)
Supplement: Figure 6—source data 1. — Spreadsheet of cellular phosphopeptides identified in mock, WT and ΔVif HIV-infected cells in the TMT-based single timepoint phosphoproteomic experiment (Figure 6, Figure 4—figure supplement 1A and Figure 6—figure supplement 1). Peptide sequence, details of the cognate protein and the position of the peptide within the protein are shown. The column 'Phosphosite Probabilities' indicates the probability that each serine, threonine or tyrosine within the peptide is phosphorylated. The amino acid is stated (S, serine; T, threonine; Y, tyrosine) with the position in the peptide in parentheses, followed by the probability (%). Each potential phosphosite is separated by a semicolon. Phosphosites with a probability of over 75% are listed in the column 'Modifications in Master Proteins', which shows a summary of the phosphorylated amino acids identified and their position in the protein. Log2 (fold change) compares phosphopeptide abundance normalized to total protein abundance, with abundance depicted on a colour scale (red = downregulated; green = upregulated). q values were determined using Limma with Benjamini-Hochberg adjustment for multiple testing, with q values < 0.01 highlighted in gold. DOI: http://dx.doi.org/10.7554/eLife.18296.020 [file elife-18296-fig6-data1.xlsx]

## Sheet: Figure 6 - source data 1
Peptide Sequence	Protein Accession	Gene ID	Protein Name	Position in Protein	Phosphosite Probabilities	Modifications in Master Proteins	# PSMs	Log2 (fold change) HIV WT vs Mock	q-value HIV WT vs Mock	Log2 (fold change) HIV ΔVif vs Mock	q-value HIV ΔVif vs Mock	Log2 (fold change) HIV WT vs HIV Δvif	q-value HIV WT vs HIV Δvif
RTSVLFSK	P55201	BRPF1	Peregrin	P55201 [889-896]	T(2): 7.2; S(3): 92.8; S(7): 0.0	P55201 1xPhospho [S891(92.8)]	1	3.35	1.81873e-05	0.91	0.262556	2.43	0.000159927
RFSDFLGLYEK	Q13596	SNX1	Sorting nexin-1	Q13596 [186-196]	S(3): 100.0; Y(9): 0.0	Q13596 1xPhospho [S188(100)]	3	2.19	3.09666e-05	-0.89	0.196119	3.08	0.000159927
MLQPSSSPLWGK	Q9Y3T9	NOC2L	Nucleolar complex protein 2 homolog	Q9Y3T9 [234-245]	S(5): 0.0; S(6): 5.7; S(7): 94.3	Q9Y3T9 1xPhospho [S240(94.3)]	2	3.32	1.81873e-05	1.61	0.024641	1.71	0.000176957
RPPSAFFLFCSEYRPK	P09429	HMGB1	High mobility group protein B1	P09429 [97-112]	S(4): 100.0; S(11): 0.0; Y(13): 0.0	P09429 1xPhospho [S100(100)]	2	2.9	2.59559e-05	0.96	0.132281	1.94	0.000176957
IGSMTGAEQALLPR	P04920	SLC4A2	Anion exchange protein 2	P04920 [241-254]	S(3): 99.7; T(5): 0.3	P04920 1xPhospho [S243(99.7)]	2	2.7	5.26358e-05	0.1	0.941414	2.59	0.000176957
RVSFADTIK	Q8NG31	CASC5	Protein CASC5	Q8NG31 [58-66]	S(3): 100.0; T(7): 0.0	Q8NG31 1xPhospho [S60(100)]	2	2.56	4.33579e-05	0.29	0.701896	2.27	0.000176957
SNVSYKNPSLMPK	Q9Y5B9	SUPT16H	FACT complex subunit SPT16	Q9Y5B9 [508-520]	S(1): 47.9; S(4): 47.9; Y(5): 3.8; S(9): 0.3		3	2.48	2.59559e-05	0.52	0.345211	1.95	0.000176957
RRFSDFLGLYEK	Q13596	SNX1	Sorting nexin-1	Q13596 [185-196]	S(4): 100.0; Y(10): 0.0	Q13596 1xPhospho [S188(100)]	2	2.15	7.16481e-05	-0.69	0.381372	2.84	0.000176957
RSSTLSQLPGDK	O60271	SPAG9	C-Jun-amino-terminal kinase-interacting protein 4	O60271 [592-603]	S(2): 0.0; S(3): 50.0; T(4): 50.0; S(6): 0.0		1	4.75	5.26358e-05	2.08	0.268248	2.68	0.000348735
RISTLTIEEGNLDIQRPK	Q12972	PPP1R8	Nuclear inhibitor of protein phosphatase 1	Q12972 [176-193]	S(3): 47.6; T(4): 47.6; T(6): 4.9		1	2.23	6.0072e-05	0.46	0.409652	1.78	0.000348735
RSECNMCNTPK	O95218	ZRANB2	Zinc finger Ran-binding domain-containing protein 2	O95218 [82-92]	S(2): 100.0; T(9): 0.0	O95218 1xPhospho [S83(100)]	1	2.01	6.20192e-05	0.14	0.793229	1.86	0.000348735
EVYELLDSPGKVLLQSK	P22234	PAICS	Multifunctional protein ADE2	P22234 [20-36]	Y(3): 0.1; S(8): 99.9; S(16): 0.0	P22234 1xPhospho [S27(100)]	3	1.84	6.20192e-05	0.19	0.723835	1.65	0.000348735
RLSTLILHGGGTVCR	Q9NYB0	TERF2IP	Telomeric repeat-binding factor 2-interacting protein 1	Q9NYB0 [41-55]	S(3): 50.0; T(4): 50.0; T(12): 0.0		1	2.24	6.20192e-05	0.37	0.52021	1.86	0.000388427
VLTLSDDLER	P55010	EIF5	Eukaryotic translation initiation factor 5	P55010 [225-234]	T(3): 0.7; S(5): 99.3	P55010 1xPhospho [S229(99.4)]	2	1.7	7.664e-05	-0.05	0.922242	1.76	0.000399297
RLSAQAHPAGK	Q2TAZ0	ATG2A	Autophagy-related protein 2 homolog A	Q2TAZ0 [401-411]	S(3): 100.0	Q2TAZ0 1xPhospho [S403(100)]	1	3.93	6.20192e-05	1.2	0.357735	2.74	0.000421701
RTPGRPTSSQSYEQNIK	O60573	EIF4E2	Eukaryotic translation initiation factor 4E type 2	O60573 [67-83]	T(2): 0.0; T(7): 5.0; S(8): 42.5; S(9): 42.5; S(11): 5.0; Y(12): 5.0		2	3.77	1.81873e-05	2.46	0.00435414	1.31	0.000421701
KKTTPTPSTNSVLSTSTNR	Q7KZI7	MARK2	Serine/threonine-protein kinase MARK2	Q7KZI7 [464-482]	T(3): 45.0; T(4): 45.0; T(6): 4.7; S(8): 4.7; T(9): 0.5; S(11): 0.0; S(14): 0.0; T(15): 0.0; S(16): 0.0; T(17): 0.0		3	1.84	7.95692e-05	-0.03	0.931867	1.86	0.000514251
RVSSPMDEVLASLK	Q8N9B5	JMY	Junction-mediating and -regulatory protein	Q8N9B5 [886-899]	S(3): 94.9; S(4): 5.1; S(12): 0.0	Q8N9B5 1xPhospho [S888(94.9)]	1	1.77	0.000109153	-0.6	0.414726	2.36	0.000514251
RISTITALGHEGK	Q96T23	RSF1	Remodeling and spacing factor 1	Q96T23 [427-439]	S(3): 87.2; T(4): 6.4; T(6): 6.4	Q96T23 1xPhospho [S429(87.2)]	1	3.22	7.95692e-05	0.01	0.995524	3.22	0.000586289
RISGCLHDIQVHPIK	Q15058	KIF14	Kinesin-like protein KIF14	Q15058 [1198-1212]	S(3): 100.0	Q15058 1xPhospho [S1200(100)]	2	2.98	7.664e-05	0.8	0.423504	2.18	0.000624433
RALSTPVVEK	P29084	GTF2E2	Transcription initiation factor IIE subunit beta	P29084 [15-24]	S(4): 50.0; T(5): 50.0		1	2.93	6.20192e-05	1.21	0.112671	1.71	0.000624433
TSEPLHNVQVLNQMITSK	O43683	BUB1	Mitotic checkpoint serine/threonine-protein kinase BUB1	O43683 [158-175]	T(1): 50.0; S(2): 50.0; T(16): 0.0; S(17): 0.0		2	2.8	7.95692e-05	0.41	0.757807	2.39	0.000624433
SARLSAMLVPVTPEVKPK	P82970	HMGN5	High mobility group nucleosome-binding domain-containing protein 5	P82970 [20-37]	S(1): 100.0; S(5): 100.0; T(12): 100.0	P82970 3xPhospho [S20(100); S24(100); T31(100)]	1	2.46	0.000104217	-0.3	0.840842	2.75	0.000624433
SKTFNPGAGLPTDK	P09661	SNRPA1	U2 small nuclear ribonucleoprotein A'	P09661 [178-191]	S(1): 100.0; T(3): 0.0; T(12): 0.0	P09661 1xPhospho [S178(100)]	1	2.44	9.00832e-05	0.16	0.907248	2.27	0.000624433
DASDDLDDLNFFNQK	P20042	EIF2S2	Eukaryotic translation initiation factor 2 subunit 2	P20042 [65-79]	S(3): 100.0	P20042 1xPhospho [S67(100)]	1	2.29	0.000104217	-0.16	0.867038	2.46	0.000624433
VGISSGKEIGALLQQLR	Q96Q11	TRNT1	CCA tRNA nucleotidyltransferase 1, mitochondrial	Q96Q11 [396-412]	S(4): 8.5; S(5): 91.5	Q96Q11 1xPhospho [S400(91.5)]	1	1.88	7.664e-05	0.45	0.292284	1.44	0.000624433
RNSPPNSLTPCLK	Q9Y2U8	LEMD3	Inner nuclear membrane protein Man1	Q9Y2U8 [775-787]	S(3): 100.0; S(7): 0.0; T(9): 0.0	Q9Y2U8 1xPhospho [S777(100)]	2	1.73	7.664e-05	0.27	0.500161	1.45	0.000624433
TKESGEYAISIK	Q9UKW4	VAV3	Guanine nucleotide exchange factor VAV3	Q9UKW4 [700-711]	T(1): 0.6; S(4): 98.8; Y(7): 0.6; S(10): 0.0	Q9UKW4 1xPhospho [S703(98.8)]	1	1.37	0.000109981	-0.17	0.735844	1.53	0.000624433
RRLSAQGQAISVVGSLSSMSPLEEEAPQAK	Q92797	SYMPK	Symplekin	Q92797 [491-520]	S(4): 99.5; S(11): 0.5; S(15): 0.0; S(17): 0.0; S(18): 0.0; S(20): 0.0	Q92797 1xPhospho [S494(99.5)]	1	2.86	8.5556e-05	0.39	0.770923	2.47	0.000637551
QFSHTNAALEEVSR	O95197	RTN3	Reticulon-3	O95197 [314-327]	S(3): 97.8; T(5): 2.2; S(13): 0.0	O95197 1xPhospho [S316(97.8)]	1	2.71	7.664e-05	0.72	0.41913	1.98	0.000637551
EVVKPVPITSPAVSK	Q96HC4	PDLIM5	PDZ and LIM domain protein 5	Q96HC4 [102-116]	T(9): 0.3; S(10): 94.6; S(14): 5.1	Q96HC4 1xPhospho [S111(94.6)]	1	1.49	9.00832e-05	0.09	0.845644	1.4	0.000637551
EFSPFGSITSAK	Q13310	PABPC4	Polyadenylate-binding protein 4	Q13310 [313-324]	S(3): 100.0; S(7): 0.0; T(9): 0.0; S(10): 0.0	Q13310 1xPhospho [S315(100)]	1	2.4	7.664e-05	0.6	0.396918	1.81	0.000672877
SAGSMCITQFMK	Q13111	CHAF1A	Chromatin assembly factor 1 subunit A	Q13111 [873-884]	S(1): 50.0; S(4): 50.0; T(8): 0.0		2	1.7	7.664e-05	0.41	0.27941	1.3	0.000672877
GPSPFSPVQLHQLR	P51531	SMARCA2	Probable global transcription activator SNF2L2	P51531 [170-183]	S(3): 50.0; S(6): 50.0		3	1.93	9.91491e-05	0.07	0.910622	1.85	0.000675122
ARPMSLSTIAILNSVKK	P42695	NCAPD3	Condensin-2 complex subunit D3	P42695 [1344-1360]	S(5): 97.1; S(7): 2.5; T(8): 0.5; S(14): 99.9	P42695 2xPhospho [S1348(97.1); S1357(99.9)]	1	2.11	7.70802e-05	0.51	0.380899	1.6	0.000767099
KISLPIEDYFNK	Q9UBD5	ORC3	Origin recognition complex subunit 3	Q9UBD5 [21-32]	S(3): 100.0; Y(9): 0.0	Q9UBD5 1xPhospho [S23(100)]	1	2.58	7.95692e-05	0.6	0.481677	1.96	0.000779226
RTFSLTEVR	O95239	KIF4A	Chromosome-associated kinesin KIF4A	O95239 [798-806]	T(2): 47.0; S(4): 47.0; T(6): 6.0		1	2.18	7.664e-05	0.67	0.210026	1.5	0.000779226
VASGVLSPPPAAPPPSSSSVPEAGGPPIKK	Q8IXM2	C17orf49; RNASEK-C17orf49	Chromatin complexes subunit BAP18	Q8IXM2 [104-133]	S(3): 0.8; S(7): 99.3; S(16): 42.3; S(17): 42.3; S(18): 7.7; S(19): 7.7	Q8IXM2 2xPhospho [S110(99.2); S]	2	1.93	0.000104217	0.15	0.844921	1.78	0.000803614
SIGSAVDQGNESIVAK	Q9H0H5	RACGAP1	Rac GTPase-activating protein 1	Q9H0H5 [203-218]	S(1): 50.0; S(4): 50.0; S(12): 0.0		1	2.95	9.91491e-05	0.56	0.646495	2.38	0.000838073
EAADLDAVPMSLSYEELVR	Q6IBW4	NCAPH2	Condensin-2 complex subunit H2	Q6IBW4 [454-472]	S(11): 3.9; S(13): 48.1; Y(14): 48.1		2	1.45	0.000258001	-0.58	0.339304	2.03	0.000838073
LTHVDSPLEAPAGPLGQVK	Q9BSJ8	ESYT1	Extended synaptotagmin-1	Q9BSJ8 [958-976]	T(2): 50.0; S(6): 50.0		1	2.87	7.95692e-05	0.86	0.370063	2.01	0.000847265
RPSLPPSK	Q6PJT7	ZC3H14	Zinc finger CCCH domain-containing protein 14	Q6PJT7 [341-348]	S(3): 100.0; S(7): 0.0	Q6PJT7 1xPhospho [S343(100)]	2	1.89	7.664e-05	0.65	0.135488	1.25	0.000869421
LFISPANEK	Q6PII3	CCDC174	Coiled-coil domain-containing protein 174	Q6PII3 [194-202]	S(4): 100.0	Q6PII3 1xPhospho [S197(100)]	1	1.37	0.000130091	0.03	0.981398	1.34	0.000869421
KKNPTPESVAIGELK	Q14CB8	ARHGAP19	Rho GTPase-activating protein 19	Q14CB8 [442-456]	T(5): 99.9; S(8): 0.1	Q14CB8 1xPhospho [T446(99.9)]	1	1.69	9.91491e-05	0.26	0.590577	1.43	0.000898913
SARLSAMLVPVTPEVKPK	P82970	HMGN5	High mobility group nucleosome-binding domain-containing protein 5	P82970 [20-37]	S(1): 100.0; S(5): 100.0; T(12): 0.0	P82970 2xPhospho [S20(100); S24(100)]	1	1.96	0.000230994	-0.68	0.533886	2.63	0.000911324
SARLSAMLVPVTPEVKPK	P82970	HMGN5	High mobility group nucleosome-binding domain-containing protein 5	P82970 [20-37]	S(1): 100.0; S(5): 100.0; T(12): 0.0	P82970 2xPhospho [S20(100); S24(100)]	1	5.28	0.000124584	1	0.898322	4.27	0.000931922
SVSSNVASVSPIPAGSKK	Q9Y6G9	DYNC1LI1	Cytoplasmic dynein 1 light intermediate chain 1	Q9Y6G9 [412-429]	S(1): 0.0; S(3): 0.0; S(4): 0.0; S(8): 0.2; S(10): 99.8; S(16): 0.0	Q9Y6G9 1xPhospho [S421(99.8)]	2	1.83	0.000106309	0.27	0.683725	1.57	0.000967663
RPSEGPQPLVR	Q5T5Y3	CAMSAP1	Calmodulin-regulated spectrin-associated protein 1	Q5T5Y3 [627-637]	S(3): 100.0	Q5T5Y3 1xPhospho [S629(100)]	1	1.58	0.000258001	-0.49	0.472525	2.07	0.000967663
SIYDDISSPGLGSTPLTSR	Q8NFH5	NUP35	Nucleoporin NUP53	Q8NFH5 [93-111]	S(1): 0.0; Y(3): 0.0; S(7): 0.7; S(8): 99.4; S(13): 50.0; T(14): 50.0; T(17): 0.0; S(18): 0.0	Q8NFH5 2xPhospho [S100(89.9); S105(98.7)]	2	2.04	7.664e-05	0.77	0.129081	1.26	0.00099425
ETEGPDFPSPSVPLK	Q8IYJ3	SYTL1	Synaptotagmin-like protein 1	Q8IYJ3 [151-165]	T(2): 0.0; S(9): 50.0; S(11): 50.0		1	1.52	0.000128495	0.1	0.863396	1.41	0.00100126
KAANMLQQSGSK	P46063	RECQL	ATP-dependent DNA helicase Q1	P46063 [626-637]	S(9): 93.9; S(11): 6.1	P46063 1xPhospho [S634(93.9)]	1	2.29	7.664e-05	0.85	0.153649	1.45	0.00108156
IKLQTPNTFPK	Q14978	NOLC1	Nucleolar and coiled-body phosphoprotein 1	Q14978 [603-613]	T(5): 100.0; T(8): 100.0	Q14978 2xPhospho [T607(100); T610(100)]	2	1.31	0.000142176	0.06	0.919366	1.24	0.00108156
ALPASETPKAAESETPGKSPEK	O76021	RSL1D1	Ribosomal L1 domain-containing protein 1	O76021 [409-430]	S(5): 1.8; T(7): 98.2; S(13): 0.0; T(15): 0.3; S(19): 99.7	O76021 2xPhospho [T415(98.2); S427(99.7)]	1	2.5	7.664e-05	1.01	0.127769	1.49	0.00111147
KEPPPCPEPGILSPSIVLTK	Q92835	INPP5D	Phosphatidylinositol 3,4,5-trisphosphate 5-phosphatase 1	Q92835 [1045-1064]	S(13): 100.0; S(15): 0.0; T(19): 0.0	Q92835 1xPhospho [S1057(100)]	1	1.85	0.000141771	0.11	0.883905	1.73	0.00111147
RVSLEPHQGPGTPESK	Q14980	NUMA1	Nuclear mitotic apparatus protein 1	Q14980 [1989-2004]	S(3): 100.0; T(12): 100.0; S(15): 0.0	Q14980 2xPhospho [S1991(100); T2000(100)]	1	1.77	7.664e-05	0.63	0.116927	1.15	0.00111147
SKTFNPGAGLPTDKK	P09661	SNRPA1	U2 small nuclear ribonucleoprotein A'	P09661 [178-192]	S(1): 8.3; T(3): 91.7; T(12): 0.0	P09661 1xPhospho [T180(91.7)]	3	2.54	0.000114646	0.55	0.59954	1.98	0.00114117
IIKPFPAPQTPGR	P78536	ADAM17	Disintegrin and metalloproteinase domain-containing protein 17	P78536 [726-738]	T(10): 100.0	P78536 1xPhospho [T735(100)]	1	2.07	0.000106309	0.42	0.477636	1.64	0.00120737
VSLERLDLDLTADSQPPVFK	Q13263	TRIM28	Transcription intermediary factor 1-beta	Q13263 [488-507]	S(2): 100.0; T(11): 0.0; S(14): 0.0	Q13263 1xPhospho [S489(100)]	3	1.11	0.000307286	-0.27	0.532937	1.38	0.00120737
RASLQASTAAPEAR	Q01433	AMPD2	AMP deaminase 2	Q01433 [74-87]	S(3): 100.0; S(7): 0.0; T(8): 0.0	Q01433 1xPhospho [S76(100)]	1	2.63	0.000185317	0.02	0.986641	2.6	0.00122806
SALAPNLLTSGKK	O15446	CD3EAP	DNA-directed RNA polymerase I subunit RPA34	O15446 [163-175]	S(1): 0.0; T(9): 50.0; S(10): 50.0		1	1.8	8.74909e-05	0.58	0.215279	1.22	0.00122806
KNPTPESVAIGELK	Q14CB8	ARHGAP19	Rho GTPase-activating protein 19	Q14CB8 [443-456]	T(4): 100.0; S(7): 0.0	Q14CB8 1xPhospho [T446(100)]	3	2.47	0.000128495	0.47	0.647992	2	0.00125917
FQSPQIQATISPPLQPK	Q7Z478	DHX29	ATP-dependent RNA helicase DHX29	Q7Z478 [190-206]	S(3): 100.0; T(9): 1.0; S(11): 99.1	Q7Z478 2xPhospho [S192(100); S200(99)]	1	1.91	0.000109153	0.46	0.428019	1.46	0.00130515
VPPAVIIPPAAPLSGR	Q9H4A3	WNK1	Serine/threonine-protein kinase WNK1	Q9H4A3 [2108-2123]	S(14): 100.0	Q9H4A3 1xPhospho [S2121(100)]	3	1.7	0.000114789	0.34	0.489382	1.35	0.00130515
QLSFISPPTPQPK	O43395	PRPF3	U4/U6 small nuclear ribonucleoprotein Prp3	O43395 [159-171]	S(3): 0.7; S(6): 99.3; T(9): 0.1	O43395 1xPhospho [S164(99.2)]	1	1.78	9.8352e-05	0.54	0.239867	1.24	0.00132231
LDVTILSPSR	O75369	FLNB	Filamin-B	O75369 [977-986]	T(4): 0.0; S(7): 94.0; S(9): 6.0	O75369 1xPhospho [S983(94)]	1	3.31	0.000106309	1.21	0.367157	2.1	0.00137084
RKSEQEFSFDTPADR	Q99590	SCAF11	Protein SCAF11	Q99590 [1125-1139]	S(3): 100.0; S(8): 0.0; T(11): 0.0	Q99590 1xPhospho [S1127(100)]	1	2.19	0.000144627	0.34	0.70516	1.85	0.00137084
KQPPVSPGTALVGSQKEPSEVPTPK	P17096	HMGA1	High mobility group protein HMG-I/HMG-Y	P17096 [31-55]	S(6): 98.0; T(9): 2.0; S(14): 0.0; S(19): 0.0; T(23): 100.0	P17096 2xPhospho [S49(100); T53(100)]	6	2.17	7.664e-05	0.89	0.0865776	1.28	0.00137084
SARLSAMLVPVTPEVKPK	P82970	HMGN5	High mobility group nucleosome-binding domain-containing protein 5	P82970 [20-37]	S(1): 100.0; S(5): 100.0; T(12): 100.0	P82970 3xPhospho [S20(100); S24(100); T31(100)]	4	4.65	0.000198616	0.3	0.966284	4.34	0.00138487
KTVQSNSPISALAPTGK	O95292	VAPB	Vesicle-associated membrane protein-associated protein B/C	O95292 [200-216]	T(2): 9.3; S(5): 80.1; S(7): 9.3; S(10): 1.2; T(15): 0.0	O95292 1xPhospho [S204(80.1)]	1	1.77	0.000331848	-0.38	0.648211	2.15	0.00144218
LTSPGALLFQ	O60566	BUB1B	Mitotic checkpoint serine/threonine-protein kinase BUB1 beta	O60566 [1041-1050]	T(2): 0.2; S(3): 99.9	O60566 1xPhospho [S1043(99.8)]	2	0.89	0.000969402	-0.58	0.151774	1.46	0.00147574
LNISFPATGCQK	P62753	RPS6	40S ribosomal protein S6	P62753 [3-14]	S(4): 100.0; T(8): 0.0	P62753 1xPhospho [S6(100)]	1	1.86	0.000226763	0.02	0.982872	1.84	0.0015307
EVTPEGLQMVK	P22234	PAICS	Multifunctional protein ADE2	P22234 [236-246]	T(3): 100.0	P22234 1xPhospho [T238(100)]	1	1.26	0.000185317	0.1	0.827054	1.15	0.0015307
SAQWLDQEEAPK	Q53H47	SETMAR	Histone-lysine N-methyltransferase SETMAR	Q53H47 [508-519]	S(1): 100.0	Q53H47 1xPhospho [S508(100)]	1	1.78	7.8372e-05	0.73	0.0813123	1.05	0.00162695
RPGVSPEGGLSVPGPGAPLEKPGR	O95873	C6orf47	Uncharacterized protein C6orf47	O95873 [127-150]	S(5): 100.0; S(11): 0.0	O95873 1xPhospho [S131(100)]	1	1.76	0.000139291	0.37	0.508479	1.39	0.00167987
EVYELLDSPGK	P22234	PAICS	Multifunctional protein ADE2	P22234 [20-30]	Y(3): 0.0; S(8): 100.0	P22234 1xPhospho [S27(100)]	3	1.56	0.000198616	0.15	0.820067	1.4	0.00169727
KPDAKPENFITQIETTPTETASR	Q96IY1	NSL1	Kinetochore-associated protein NSL1 homolog	Q96IY1 [227-249]	T(11): 0.0; T(15): 49.5; T(16): 49.5; T(18): 1.0; T(20): 0.0; S(22): 0.0		2	1.19	0.000249011	0	0.989484	1.19	0.00169727
DLHVSTGEFTDLK	O43264	ZW10	Centromere/kinetochore protein zw10 homolog	O43264 [84-96]	S(5): 94.7; T(6): 5.3; T(10): 0.0	O43264 1xPhospho [S88(94.7)]	1	1.49	0.000163688	0.23	0.613022	1.25	0.00175074
HKVNEHEQDGNELQTTPEFR	Q96C57	C12orf43	Uncharacterized protein C12orf43	Q96C57 [64-83]	T(15): 10.6; T(16): 89.4	Q96C57 1xPhospho [T79(89.4)]	1	2.25	7.86135e-05	1.03	0.0686947	1.22	0.00184086
LTTTRKTPQGPPEIYSDTQFPSLQSTAK	Q9UKY7	CDV3	Protein CDV3 homolog	Q9UKY7 [176-203]	T(2): 11.9; T(3): 11.9; T(4): 11.9; T(7): 63.1; Y(15): 0.5; S(16): 0.5; T(18): 0.1; S(22): 0.0; S(25): 0.0; T(26): 0.0		4	2.01	0.000164592	0.42	0.581187	1.59	0.00184086
GLSQNQQIPQNSVTPR	Q8WYP5	AHCTF1	Protein ELYS	Q8WYP5 [1795-1810]	S(3): 0.0; S(12): 0.0; T(14): 100.0	Q8WYP5 1xPhospho [T1808(100)]	1	1.83	7.664e-05	0.88	0.0352423	0.95	0.00184086
RQSMAFSILNTPK	Q14980	NUMA1	Nuclear mitotic apparatus protein 1	Q14980 [2045-2057]	S(3): 100.0; S(7): 0.0; T(11): 0.0	Q14980 1xPhospho [S2047(100)]	1	2.1	0.000104217	0.76	0.184225	1.34	0.00189661
KGSVDQYLLR	Q8NCN4	RNF169	E3 ubiquitin-protein ligase RNF169	Q8NCN4 [691-700]	S(3): 90.7; Y(7): 9.3	Q8NCN4 1xPhospho [S693(90.7)]	1	0.95	0.000655127	-0.29	0.411639	1.24	0.00199645
LQTPNTFPK	Q14978	NOLC1	Nucleolar and coiled-body phosphoprotein 1	Q14978 [605-613]	T(3): 0.0; T(6): 100.0	Q14978 1xPhospho [T607(100)]	2	1.33	0.000192841	0.2	0.637865	1.12	0.00203925
SIDISATIPK	Q15003	NCAPH	Condensin complex subunit 2	Q15003 [92-101]	S(1): 92.8; S(5): 7.1; T(7): 0.1	Q15003 1xPhospho [S92(92.8)]	1	1.31	0.000446774	-0.22	0.668397	1.52	0.00203925
RGASGSIFSK	Q7KZI7	MARK2	Serine/threonine-protein kinase MARK2	Q7KZI7 [628-637]	S(4): 99.1; S(6): 0.9; S(9): 0.0	Q7KZI7 1xPhospho [S631(99.1)]	1	1.08	0.000628842	-0.31	0.455672	1.38	0.00203925
GSGLGSPTSSFNSTVFGPSSLNSLR	O43524	FOXO3	Forkhead box protein O3	O43524 [420-444]	S(2): 0.8; S(6): 48.7; T(8): 48.7; S(9): 0.8; S(10): 0.8; S(13): 0.0; T(14): 0.0; S(19): 0.0; S(20): 0.0; S(23): 0.0		2	1.43	0.000390768	-0.23	0.798362	1.67	0.00206957
FHESYNFNMK	O95251	KAT7	Histone acetyltransferase KAT7	O95251 [175-184]	S(4): 94.6; Y(5): 5.4	O95251 1xPhospho [S178(94.6)]	1	2.61	8.74909e-05	1.25	0.0865776	1.35	0.00207194
KGVLGKSPLSALAR	Q9BQG0	MYBBP1A	Myb-binding protein 1A	Q9BQG0 [1284-1297]	S(7): 10.2; S(10): 89.8	Q9BQG0 1xPhospho [S1293(89.8)]	1	1.92	0.000185317	0.4	0.560013	1.51	0.00209172
RISTSDILSEK	O60293	ZFC3H1	Zinc finger C3H1 domain-containing protein	O60293 [350-360]	S(3): 99.5; T(4): 0.4; S(5): 0.0; S(9): 0.0	O60293 1xPhospho [S352(99.5)]	1	1.89	0.000190385	0.33	0.584496	1.56	0.00209172
SVLCSTPTINIPASPFMQK	Q96KB5	PBK	Lymphokine-activated killer T-cell-originated protein kinase	Q96KB5 [19-37]	S(1): 0.0; S(5): 0.0; T(6): 0.0; T(8): 0.0; S(14): 100.0	Q96KB5 1xPhospho [S32(100)]	1	1.76	0.000126836	0.54	0.270003	1.21	0.00209172
RKFSAGGDSDPPLK	O75152	ZC3H11A	Zinc finger CCCH domain-containing protein 11A	O75152 [287-300]	S(4): 99.5; S(9): 0.5	O75152 1xPhospho [S290(99.5)]	1	2.09	0.000204951	0.36	0.664877	1.72	0.00211413
VSLERLDLDLTADSQPPVFK	Q13263	TRIM28	Transcription intermediary factor 1-beta	Q13263 [488-507]	S(2): 100.0; T(11): 100.0; S(14): 0.0	Q13263 2xPhospho [S489(100); T498(100)]	1	1.72	0.000236918	0.18	0.770231	1.53	0.00211413
SRFTPELQPK	Q14676	MDC1	Mediator of DNA damage checkpoint protein 1	Q14676 [1797-1806]	S(1): 0.0; T(4): 100.0	Q14676 1xPhospho [T1800(100)]	2	1.72	0.000233429	0.2	0.755831	1.52	0.00211413
EGIVKQDSLVINLNR	Q9Y5B9	SUPT16H	FACT complex subunit SPT16	Q9Y5B9 [643-657]	S(8): 100.0	Q9Y5B9 1xPhospho [S650(100)]	1	1.36	0.000147249	0.34	0.370063	1.02	0.00211413
VNSGDTEVGSSLLR	O75592	MYCBP2	E3 ubiquitin-protein ligase MYCBP2	O75592 [3465-3478]	S(3): 100.0; T(6): 0.0; S(10): 0.0; S(11): 0.0	O75592 1xPhospho [S3467(100)]	2	1.13	0.000500011	-0.22	0.648814	1.34	0.00211413
LGLPPLTPEQQEALQK	Q9UHX1	PUF60	Poly(U)-binding-splicing factor PUF60	Q9UHX1 [54-69]	T(7): 100.0	Q9UHX1 1xPhospho [T60(100)]	1	1.38	0.000242411	0.13	0.793229	1.25	0.00213681
SAGSMCITQFMK	Q13111	CHAF1A	Chromatin assembly factor 1 subunit A	Q13111 [873-884]	S(1): 5.8; S(4): 94.2; T(8): 0.0	Q13111 1xPhospho [S876(94.2)]	2	1.73	9.91491e-05	0.67	0.10862	1.06	0.00216917
LEAIITPPPAKK	O75367	H2AFY	Core histone macro-H2A.1	O75367 [124-135]	T(6): 100.0	O75367 1xPhospho [T129(100)]	3	1.45	0.000185317	0.3	0.51582	1.16	0.00216917
KLPSDSGDLEALEGK	O60524	NEMF	Nuclear export mediator factor NEMF	O60524 [828-842]	S(4): 93.6; S(6): 6.4	O60524 1xPhospho [S831(93.6)]	1	0.9	0.000861746	-0.29	0.369681	1.19	0.00216917
TFSLTEVR	O95239	KIF4A	Chromosome-associated kinesin KIF4A	O95239 [799-806]	T(1): 0.0; S(3): 100.0; T(5): 0.0	O95239 1xPhospho [S801(100)]	1	2.14	0.000133115	0.73	0.254057	1.42	0.00223515
TAESQTPTPSATSFFSGKSPVTTLLECMHK	P55265	ADAR	Double-stranded RNA-specific adenosine deaminase	P55265 [596-625]	T(1): 0.0; S(4): 0.2; T(6): 10.0; T(8): 77.1; S(10): 10.0; T(12): 1.4; S(13): 1.4; S(16): 11.5; S(19): 88.4; T(22): 0.0; T(23): 0.0	P55265 2xPhospho [T603(77.1); S614(88.4)]	2	2.09	0.000105754	0.85	0.134608	1.24	0.00223515
ARHDSPDLAPNVTYSLPR	Q9BRD0	BUD13	BUD13 homolog	Q9BRD0 [267-284]	S(5): 100.0; T(13): 47.6; Y(14): 4.7; S(15): 47.6	Q9BRD0 2xPhospho [S271(100); T/S/Y]	2	1.61	0.000139519	0.47	0.287239	1.14	0.00223515
SLRLSAQK	Q9ULW0	TPX2	Targeting protein for Xklp2	Q9ULW0 [121-128]	S(1): 0.0; S(5): 100.0	Q9ULW0 1xPhospho [S125(100)]	1	0.69	0.00324319	-0.63	0.0922368	1.31	0.00223515
GRPSQEPPLAPPHR	Q5VWQ0	RSBN1	Round spermatid basic protein 1	Q5VWQ0 [101-114]	S(4): 100.0	Q5VWQ0 1xPhospho [S104(100)]	1	1.12	0.00051265	-0.17	0.716023	1.3	0.00226549
RLSQPAGGLLDSITNIFGR	Q676U5	ATG16L1	Autophagy-related protein 16-1	Q676U5 [267-285]	S(3): 100.0; S(12): 0.0; T(14): 0.0	Q676U5 1xPhospho [S269(100)]	3	2.12	7.664e-05	1.17	0.0150442	0.95	0.00228822
GQAAQPEPSTGFTATPPAPDSPQEPLVLR	Q9BVT8	TMUB1	Transmembrane and ubiquitin-like domain-containing protein 1	Q9BVT8 [78-106]	S(9): 48.2; T(10): 48.2; T(13): 2.7; T(15): 2.1; S(21): 98.9	Q9BVT8 2xPhospho [T92(96); S98(100)]	2	1.53	0.000128495	0.5	0.220018	1.03	0.00228822
RSSLLSLMTGK	Q6WKZ4	RAB11FIP1	Rab11 family-interacting protein 1	Q6WKZ4 [433-443]	S(2): 50.0; S(3): 50.0; S(6): 0.0; T(9): 0.0		4	2.75	7.664e-05	1.64	0.0204989	1.11	0.00231891
ERSGGEQAQDWDALPPK	Q92979	EMG1	Ribosomal RNA small subunit methyltransferase NEP1	Q92979 [12-28]	S(3): 100.0	Q92979 1xPhospho [S14(100)]	2	1.87	0.000226763	0.35	0.618875	1.53	0.00231891
RPPSGFFLFCSEFRPK	O15347	HMGB3	High mobility group protein B3	O15347 [95-110]	S(4): 100.0; S(11): 0.0	O15347 1xPhospho [S98(100)]	1	1.69	0.000132134	0.54	0.223139	1.16	0.00231891
EGQPSPADEKGNDSDGEGESDDPEKK	O75351	VPS4B	Vacuolar protein sorting-associated protein 4B	O75351 [89-114]	S(5): 0.5; S(14): 96.8; S(20): 2.7	O75351 1xPhospho [S102(96.8)]	1	-0.7	0.0161667	0.56	0.0266512	-1.26	0.00231891
AEGGQGEQQPLSGSWTSPQLPSR	Q9Y2I7	PIKFYVE	1-phosphatidylinositol 3-phosphate 5-kinase	Q9Y2I7 [60-82]	S(12): 0.1; S(14): 1.4; T(16): 49.2; S(17): 49.2; S(22): 0.3	Q9Y2I7 1xPhospho [S76(86.9)]	3	1.4	0.000198616	0.28	0.516981	1.1	0.00232437
RVTLNTLQAWSK	Q13112	CHAF1B	Chromatin assembly factor 1 subunit B	Q13112 [483-494]	T(3): 100.0; T(6): 0.0; S(11): 0.0	Q13112 1xPhospho [T485(99.9)]	2	3.82	0.000288024	0.74	0.840407	3.08	0.00238906
GEQVPLHGGSPQVTVTGPSR	Q9HAP2	MLXIP	MLX-interacting protein	Q9HAP2 [660-679]	S(10): 84.7; T(14): 12.8; T(16): 0.4; S(19): 2.1	Q9HAP2 1xPhospho [S669(84.7)]	1	2.1	0.000163488	0.66	0.322982	1.44	0.00242662
SILVSPTGPSR	Q14684	RRP1B	Ribosomal RNA processing protein 1 homolog B	Q14684 [702-712]	S(1): 0.1; S(5): 97.7; T(7): 1.9; S(10): 0.3	Q14684 1xPhospho [S706(97.7)]	2	1.2	0.000236918	0.2	0.631714	1	0.00242662
IPCESPPLEVVDTTASTK	P46013	MKI67	Antigen KI-67	P46013 [2704-2721]	S(5): 97.3; T(13): 2.2; T(14): 0.4; S(16): 0.1; T(17): 0.0	P46013 1xPhospho [S2708(97.3)]	1	0.92	0.000876766	-0.28	0.450653	1.21	0.00242662
KANNSQEPSPQLASSVASTR	Q96HC4	PDLIM5	PDZ and LIM domain protein 5	Q96HC4 [305-324]	S(5): 1.4; S(9): 98.6; S(14): 0.0; S(15): 0.0; S(18): 0.0; T(19): 0.0	Q96HC4 1xPhospho [S313(98.6)]	1	1.49	0.000202434	0.32	0.488827	1.17	0.00244831
RFSQGPTPAAAVPEGTAAEGAPR	Q96G46	DUS3L	tRNA-dihydrouridine(47) synthase [NAD(P)(+)]-like	Q96G46 [234-256]	S(3): 92.5; T(7): 7.5; T(16): 0.0	Q96G46 1xPhospho [S236(92.5)]	1	2.02	0.000285084	0.27	0.780683	1.75	0.00252312
EMSGSTSELLIK	Q9NS91	RAD18	E3 ubiquitin-protein ligase RAD18	Q9NS91 [140-151]	S(3): 100.0; S(5): 0.0; T(6): 0.0; S(7): 0.0	Q9NS91 1xPhospho [S142(100)]	1	2.05	9.91491e-05	0.91	0.0711408	1.13	0.00252332
SLLPVKPVEIEIETPEQAK	Q01831	XPC	DNA repair protein complementing XP-C cells	Q01831 [156-174]	S(1): 0.0; T(14): 100.0	Q01831 1xPhospho [T169(100)]	1	1.61	0.000263844	0.25	0.706649	1.37	0.00252332
TRTSQEELLAEVVQGQSR	Q6PJT7	ZC3H14	Zinc finger CCCH domain-containing protein 14	Q6PJT7 [387-404]	T(1): 0.3; T(3): 5.5; S(4): 94.2; S(17): 0.0	Q6PJT7 1xPhospho [S390(94.2)]	1	1.49	0.000330506	0.11	0.875759	1.39	0.00252332
ASGQAFELILSPR	P16949	STMN1	Stathmin	P16949 [15-27]	S(2): 100.0; S(11): 100.0	P16949 2xPhospho [S16(100); S25(100)]	7	2.5	0.000104217	1.19	0.0900828	1.3	0.00263372
ADIPVKSSPQAAVPYKK	Q9H2P0	ADNP	Activity-dependent neuroprotector homeobox protein	Q9H2P0 [601-617]	S(7): 12.0; S(8): 88.0; Y(15): 0.0	Q9H2P0 1xPhospho [S608(88)]	2	1.32	0.000198616	0.31	0.414703	1.02	0.00268804
KSEGSLAYVK	Q96KP1	EXOC2	Exocyst complex component 2	Q96KP1 [197-206]	S(2): 100.0; S(5): 0.0; Y(8): 0.0	Q96KP1 1xPhospho [S198(100)]	1	3.94	7.664e-05	4.63	5.59141e-05	-0.69	0.00281553
EMSGSTSELLIK	Q9NS91	RAD18	E3 ubiquitin-protein ligase RAD18	Q9NS91 [140-151]	S(3): 33.3; S(5): 33.3; T(6): 33.3; S(7): 0.0		2	2.51	7.95692e-05	1.39	0.0343959	1.13	0.00281553
KTSATVGPK	P16104	H2AFX	Histone H2AX	P16104 [120-128]	T(2): 0.5; S(3): 99.5; T(5): 0.0	P16104 1xPhospho [S122(99.5)]	1	2.43	7.664e-05	1.39	0.0235214	1.03	0.00281553
QLILPGNSGNLK	Q9P270	SLAIN2	SLAIN motif-containing protein 2	Q9P270 [227-238]	S(8): 100.0	Q9P270 1xPhospho [S234(100)]	1	1.82	0.000198616	0.5	0.382522	1.31	0.00281553
KATGPPVSELITK	P16401	HIST1H1B	Histone H1.5	P16401 [37-49]	T(3): 100.0; S(8): 0.0; T(12): 0.0	P16401 1xPhospho [T39(100)]	1	1.06	0.000368195	0.03	0.900188	1.04	0.00281553
SLSQPTPPPMPILSQSEAK	Q9UPN3	MACF1	Microtubule-actin cross-linking factor 1, isoforms 1/2/3/5	Q9UPN3 [6967-6985]	S(1): 50.0; S(3): 50.0; T(6): 0.0; S(14): 0.0; S(16): 0.0		3	0.83	0.0021625	-0.53	0.206309	1.36	0.00281553
MSLPLLAGGVADDINTNKK	Q15398	DLGAP5	Disks large-associated protein 5	Q15398 [724-742]	S(2): 100.0; T(16): 0.0	Q15398 1xPhospho [S725(100)]	2	0.5	0.012506	-0.78	0.0426591	1.29	0.00281553
RVSQNSLGEMTK	Q9ULH0	KIDINS220	Kinase D-interacting substrate of 220 kDa	Q9ULH0 [880-891]	S(3): 100.0; S(6): 100.0; T(11): 0.0	Q9ULH0 2xPhospho [S882(100); S885(100)]	1	3.23	0.000114789	1.72	0.108123	1.51	0.0028417
RYSDHAGPAIPSVVAYPK	P27448	MARK3	MAP/microtubule affinity-regulating kinase 3	P27448 [417-434]	Y(2): 6.1; S(3): 47.0; S(12): 47.0; Y(16): 0.0		1	2.25	0.000238928	0.59	0.509657	1.65	0.0028417
RLSTIDESGSILSDISFDKTDESLDWDSSLVK	Q9H0H5	RACGAP1	Rac GTPase-activating protein 1	Q9H0H5 [142-173]	S(3): 3.6; T(4): 15.0; S(8): 15.0; S(10): 66.1; S(13): 0.2; S(16): 0.0; T(20): 0.0; S(23): 0.0; S(28): 0.0; S(29): 0.0		2	2.03	0.000314882	0.25	0.753369	1.78	0.0028417
AMKPPGGESSNLFGSPEEATPSSRPNR	Q9H910	HN1L	Hematological and neurological expressed 1-like protein	Q9H910 [16-42]	S(9): 0.0; S(10): 0.0; S(15): 100.0; T(20): 0.0; S(22): 0.0; S(23): 0.0	Q9H910 1xPhospho [S30(100)]	5	1.89	0.000137313	0.73	0.170685	1.18	0.0028417
SVEERDSGSFVAFQNIPGSELMSSFAK	P42166	TMPO	Lamina-associated polypeptide 2, isoform alpha	P42166 [436-462]	S(1): 11.7; S(7): 76.6; S(9): 11.7; S(19): 0.0; S(23): 0.0; S(24): 0.0	P42166 1xPhospho [S442(76.6)]	2	1.62	0.000264853	0.28	0.602197	1.34	0.0028417
ATSVALPGWSPSETR	Q16513	PKN2	Serine/threonine-protein kinase N2	Q16513 [351-365]	T(2): 0.0; S(3): 0.0; S(10): 3.8; S(12): 48.1; T(14): 48.1		2	1.57	0.000185317	0.46	0.308378	1.13	0.0028417
YSDHAGPAIPSVVAYPK	P27448	MARK3	MAP/microtubule affinity-regulating kinase 3	P27448 [418-434]	Y(1): 99.9; S(2): 0.1; S(11): 0.0; Y(15): 0.0	P27448 1xPhospho [Y418(99.9)]	1	1.56	0.00012518	0.59	0.130597	0.96	0.00284679
RSIFASPESVTGK	O75940	SMNDC1	Survival of motor neuron-related-splicing factor 30	O75940 [196-208]	S(2): 0.0; S(6): 100.0; S(9): 0.0; T(11): 0.0	O75940 1xPhospho [S201(100)]	1	1.95	0.000179878	0.68	0.275027	1.28	0.00286716
MPNSPAPHFAMPPIHEDHLEK	Q9Y4K1	AIM1	Absent in melanoma 1 protein	Q9Y4K1 [722-742]	S(4): 100.0	Q9Y4K1 1xPhospho [S725(100)]	1	1.92	0.000341233	0.26	0.776549	1.66	0.00294423
SAPCGSLAFSGDR	P78559	MAP1A	Microtubule-associated protein 1A	P78559 [2188-2200]	S(1): 0.0; S(6): 0.0; S(10): 100.0	P78559 1xPhospho [S2197(100)]	1	2.15	9.91491e-05	1.08	0.0534797	1.06	0.00295931
AQIEEPDPPEMETSLDSSEMAK	Q96T23	RSF1	Remodeling and spacing factor 1	Q96T23 [527-548]	T(13): 0.0; S(14): 98.9; S(17): 1.0; S(18): 0.1	Q96T23 1xPhospho [S540(98.9)]	3	1.06	0.000405262	0.08	0.898097	0.99	0.00300695
TQQSPISNGSPELGIK	Q15723	ELF2	ETS-related transcription factor Elf-2	Q15723 [182-197]	T(1): 0.1; S(4): 99.8; S(7): 0.1; S(10): 0.0	Q15723 1xPhospho [S185(99.8)]	1	1.02	0.000657664	-0.02	0.840334	1.04	0.00320186
RLSAQGQAISVVGSLSSMSPLEEEAPQAK	Q92797	SYMPK	Symplekin	Q92797 [492-520]	S(3): 99.8; S(10): 0.2; S(14): 0.0; S(16): 0.0; S(17): 0.0; S(19): 0.0	Q92797 1xPhospho [S494(100)]	5	2.69	0.000559617	-0.19	0.94198	2.88	0.00323474
ISELEIINSSFENILQEKEQEK	P49454	CENPF	Centromere protein F	P49454 [2504-2525]	S(2): 0.0; S(9): 0.1; S(10): 99.9	P49454 1xPhospho [S2513(99.9)]	1	2.37	0.000204951	0.84	0.320594	1.54	0.00323474
GLPAPGPSPADK	P42768	WAS	Wiskott-Aldrich syndrome protein	P42768 [214-225]	S(8): 100.0	P42768 1xPhospho [S221(100)]	3	1.75	0.000163688	0.63	0.199677	1.13	0.00323474
DYNPYNYSDSISPFNKSALK	O75122	CLASP2	CLIP-associating protein 2	O75122 [1018-1037]	Y(2): 0.0; Y(5): 0.0; Y(7): 0.0; S(8): 0.0; S(10): 0.0; S(12): 100.0; S(17): 100.0	O75122 2xPhospho [S1029(100); S1034(100)]	2	1.71	0.000105754	0.77	0.0683187	0.95	0.00323474
AELEALGMKGTPSLGK	Q9BW71	HIRIP3	HIRA-interacting protein 3	Q9BW71 [461-476]	T(11): 100.0; S(13): 0.0	Q9BW71 1xPhospho [T471(100)]	2	1.69	0.000236918	0.42	0.427075	1.27	0.00323474
AHTSPAPAPRPTPR	Q96P48	ARAP1	Arf-GAP with Rho-GAP domain, ANK repeat and PH domain-containing protein 1	Q96P48 [67-80]	T(3): 0.7; S(4): 0.7; T(12): 98.6	Q96P48 1xPhospho [T78(98.6)]	2	1.52	0.000234154	0.39	0.399334	1.12	0.00323474
DIDNNLITSTPR	Q05D32	CTDSPL2	CTD small phosphatase-like protein 2	Q05D32 [77-88]	T(8): 4.7; S(9): 47.6; T(10): 47.6		1	1.59	0.000125189	0.65	0.107598	0.94	0.00325266
QVLDYPSPDVECAK	Q9P270	SLAIN2	SLAIN motif-containing protein 2	Q9P270 [154-167]	Y(5): 0.0; S(7): 100.0	Q9P270 1xPhospho [S160(100)]	1	1.31	0.00076059	-0.17	0.79139	1.48	0.00336908
TKEVYELLDSPGK	P22234	PAICS	Multifunctional protein ADE2	P22234 [18-30]	T(1): 0.0; Y(5): 0.0; S(10): 100.0	P22234 1xPhospho [S27(100)]	3	1.72	0.000234163	0.5	0.374179	1.23	0.00340127
RRSLPAGDALYLSFNPPQPSR	Q92974	ARHGEF2	Rho guanine nucleotide exchange factor 2	Q92974 [884-904]	S(3): 100.0; Y(11): 0.0; S(13): 0.0; S(20): 0.0	Q92974 1xPhospho [S886(100)]	1	1.74	0.000185317	0.59	0.223617	1.14	0.0034111
TQSSLVEAFNK	Q8N1G0	ZNF687	Zinc finger protein 687	Q8N1G0 [493-503]	T(1): 4.4; S(3): 91.2; S(4): 4.4	Q8N1G0 1xPhospho [S495(91.2)]	1	1.68	0.000168371	0.61	0.184225	1.08	0.00357181
RLSTSPDVIQGHQPR	Q9Y385	UBE2J1	Ubiquitin-conjugating enzyme E2 J1	Q9Y385 [264-278]	S(3): 96.7; T(4): 51.6; S(5): 51.6	Q9Y385 2xPhospho [S266(95.3); T/S]	4	2.8	0.000231097	1.08	0.335312	1.71	0.00361001
KDFLAMFSPK	O60711	LPXN	Leupaxin	O60711 [260-269]	S(8): 100.0	O60711 1xPhospho [S267(100)]	1	1.15	0.00122804	-0.33	0.563206	1.48	0.00367374
YLGSPITTVPK	P30307	CDC25C	M-phase inducer phosphatase 3	P30307 [165-175]	Y(1): 100.0; S(4): 0.0; T(7): 0.0; T(8): 0.0	P30307 1xPhospho [Y165(100)]	1	1.06	0.000729556	-0.16	0.867695	1.22	0.00367374
RSAEGSNPPKPLK	P06400	RB1	Retinoblastoma-associated protein	P06400 [861-873]	S(2): 1.3; S(6): 98.7	P06400 1xPhospho [S866(98.7)]	1	3.04	0.000104217	1.79	0.0485982	1.25	0.00378452
RASGQAFELILSPR	P16949	STMN1	Stathmin	P16949 [14-27]	S(3): 100.0; S(12): 100.0	P16949 2xPhospho [S16(100); S25(100)]	33	2.2	0.000124535	1.04	0.08418	1.15	0.00378452
ESTGNMVTGQTVCK	Q15021	NCAPD2	Condensin complex subunit 1	Q15021 [584-597]	S(2): 50.0; T(3): 50.0; T(8): 0.0; T(11): 0.0		2	1.83	0.000330633	0.38	0.587659	1.45	0.00378452
VNLFPGLSPSALK	Q9C0C2	TNKS1BP1	182 kDa tankyrase-1-binding protein	Q9C0C2 [1645-1657]	S(8): 100.0; S(10): 0.0	Q9C0C2 1xPhospho [S1652(100)]	2	1.69	0.000258001	0.47	0.406248	1.22	0.00378452
QAGGFLGPPPPSGKFS	Q9UM00	TMCO1	Transmembrane and coiled-coil domain-containing protein 1	Q9UM00 [173-188]	S(12): 0.0; S(16): 100.0	Q9UM00 1xPhospho [S188(100)]	2	1.16	0.000554241	0.02	0.96513	1.14	0.00378452
RSTQGVTLTDLK	Q9BZL4	PPP1R12C	Protein phosphatase 1 regulatory subunit 12C	Q9BZL4 [558-569]	S(2): 50.0; T(3): 50.0; T(7): 0.1; T(9): 0.0		2	0.38	0.259825	1.51	0.00235265	-1.14	0.00378452
SVIDPVPAPVGDSHVDGAAKSLDK	Q13177	PAK2	Serine/threonine-protein kinase PAK 2	Q13177 [197-220]	S(1): 100.0; S(13): 2.3; S(21): 97.7	Q13177 2xPhospho [S197(100); S217(97.7)]	1	4.41	7.664e-05	5.01	5.59141e-05	-0.6	0.00379204
AGCAVTSLLASELTK	O60610	DIAPH1	Protein diaphanous homolog 1	O60610 [1225-1239]	T(6): 50.0; S(7): 50.0; S(11): 0.0; T(14): 0.0		2	2.34	0.000671602	-0.08	0.967878	2.42	0.00406181
SVLCSTPTINIPASPFMQK	Q96KB5	PBK	Lymphokine-activated killer T-cell-originated protein kinase	Q96KB5 [19-37]	S(1): 0.0; S(5): 0.0; T(6): 0.0; T(8): 0.0; S(14): 100.0	Q96KB5 1xPhospho [T26(98.9)]	2	1.06	0.000657664	0	0.995428	1.05	0.00418322
VLAPILPDNFSTPTGSR	Q9NQS7	INCENP	Inner centromere protein	Q9NQS7 [281-297]	S(11): 50.0; T(12): 50.0; T(14): 0.0; S(16): 0.0		6	0.64	0.00658312	-0.58	0.133988	1.23	0.00418322
NIKDVQSPGFLNEPLSSK	Q8NG31	CASC5	Protein CASC5	Q8NG31 [1070-1087]	S(7): 100.0; S(16): 0.0; S(17): 0.0	Q8NG31 1xPhospho [S1076(100)]	1	1.29	0.000331848	0.26	0.526353	1.03	0.00429713
RRTEEGPTLSYGR	P43243	MATR3	Matrin-3	P43243 [148-160]	T(3): 100.0; T(8): 0.0; S(10): 0.0; Y(11): 0.0	P43243 1xPhospho [T150(100)]	1	2.15	0.000103441	1.15	0.0394101	1	0.00430263
SNFSNSADDIK	P45973	CBX5	Chromobox protein homolog 5	P45973 [92-102]	S(1): 100.0; S(4): 0.0; S(6): 0.0	P45973 1xPhospho [S92(100)]	1	1.51	0.000818108	-0.13	0.900188	1.62	0.00434875
ILNVSVIEESGNKNDQK	P28290	SSFA2	Sperm-specific antigen 2	P28290 [326-342]	S(5): 100.0; S(10): 0.0	P28290 1xPhospho [S330(100)]	1	3.28	0.000676595	0.06	0.992373	3.22	0.00445534
NFRVSDGDWICPDKK	O95218	ZRANB2	Zinc finger Ran-binding domain-containing protein 2	O95218 [5-19]	S(5): 100.0	O95218 1xPhospho [S9(100)]	2	3.15	0.000594121	0.31	0.920115	2.84	0.00445534
GSAMQVSPLMFTDK	P50851	LRBA	Lipopolysaccharide-responsive and beige-like anchor protein	P50851 [2490-2503]	S(2): 0.0; S(7): 100.0; T(12): 0.0	P50851 1xPhospho [S2496(100)]	1	0.65	0.00747505	-0.62	0.131318	1.27	0.00445534
KVSLNTYTPAK	O43314	PPIP5K2	Inositol hexakisphosphate and diphosphoinositol-pentakisphosphate kinase 2	O43314 [1178-1188]	S(3): 100.0; T(6): 0.0; Y(7): 0.0; T(8): 0.0	O43314 1xPhospho [S1180(100)]	1	1.61	0.000979788	-0.25	0.812179	1.86	0.00448497
VAAETQSPSLFGSTK	Q9UKX7	NUP50	Nuclear pore complex protein Nup50	Q9UKX7 [215-229]	T(5): 33.3; S(7): 33.3; S(9): 33.3; S(13): 0.0; T(14): 0.0		3	1.25	0.000330506	0.3	0.46648	0.96	0.00469752
MSLPLLAGGVADDINTNKK	Q15398	DLGAP5	Disks large-associated protein 5	Q15398 [724-742]	S(2): 100.0; T(16): 0.0	Q15398 1xPhospho [S725(100)]	2	0.66	0.00937394	-0.73	0.113518	1.4	0.00469752
FDPAMFNISPGAVQF	Q8IVD9	NUDCD3	NudC domain-containing protein 3	Q8IVD9 [347-361]	S(9): 100.0	Q8IVD9 1xPhospho [S355(100)]	3	2.01	0.000473865	0.33	0.749211	1.68	0.00476884
RPSYTLGMK	O43166	SIPA1L1	Signal-induced proliferation-associated 1-like protein 1	O43166 [1630-1638]	S(3): 99.5; Y(4): 0.5; T(5): 0.0	O43166 1xPhospho [S1632(99.5)]	2	0.69	0.00758121	-0.67	0.139806	1.36	0.00476884
SVPAGLTLQSVSPQSLQGK	Q9HAU0	PLEKHA5	Pleckstrin homology domain-containing family A member 5	Q9HAU0 [596-614]	S(1): 99.0; T(7): 1.0; S(10): 0.0; S(12): 0.0; S(15): 0.0	Q9HAU0 1xPhospho [S596(99.9)]	3	1.26	0.000439966	0.19	0.691145	1.07	0.00477446
LSLQDVPELVDAK	Q8N5W9	FAM101B	Protein FAM101B	Q8N5W9 [5-17]	S(2): 100.0	Q8N5W9 1xPhospho [S6(100)]	1	3.15	0.000122002	1.85	0.057717	1.3	0.00487436
SPAFALK	Q9ULW0	TPX2	Targeting protein for Xklp2	Q9ULW0 [486-492]	S(1): 100.0	Q9ULW0 1xPhospho [S486(100)]	3	1.05	0.00107345	-0.11	0.808176	1.16	0.00487436
VVVDPVVTEQPSTSSAAK	Q8WWQ0	PHIP	PH-interacting protein	Q8WWQ0 [1511-1528]	T(8): 0.0; S(12): 0.0; T(13): 0.0; S(14): 0.5; S(15): 99.5	Q8WWQ0 1xPhospho [S1525(99.5)]	3	0.87	0.00170051	-0.23	0.568235	1.1	0.00487436
RGSALGPDEAGGELER	O75145	PPFIA3	Liprin-alpha-3	O75145 [15-30]	S(3): 100.0	O75145 1xPhospho [S17(100)]	1	-0.9	0.041496	0.67	0.0378284	-1.57	0.00487436
RRYSDFEWLR	O60493	SNX3	Sorting nexin-3	O60493 [69-78]	Y(3): 6.5; S(4): 93.5	O60493 1xPhospho [S72(93.5)]	1	1.96	0.000106309	1.05	0.0398939	0.91	0.00497434
YGGSPRDPVLTLR	Q86XL3	ANKLE2	Ankyrin repeat and LEM domain-containing protein 2	Q86XL3 [509-521]	Y(1): 7.9; S(4): 92.1; T(11): 0.0	Q86XL3 1xPhospho [S512(92.1)]	1	1.52	0.00054689	0.19	0.801848	1.33	0.00497434
SVENQESVEIINDLK	Q8WYP5	AHCTF1	Protein ELYS	Q8WYP5 [1878-1892]	S(1): 100.0; S(7): 0.0	Q8WYP5 1xPhospho [S1878(100)]	3	1.28	0.000650152	0.08	0.903726	1.19	0.00497434
TKEVYELLDSPGKVLLQSK	P22234	PAICS	Multifunctional protein ADE2	P22234 [18-36]	T(1): 0.0; Y(5): 0.0; S(10): 100.0; S(18): 0.0	P22234 1xPhospho [S27(100)]	4	1.77	0.000528865	0.27	0.765651	1.51	0.0051153
AMKPPGGESSNLFGSPEEATPSSRPNR	Q9H910	HN1L	Hematological and neurological expressed 1-like protein	Q9H910 [16-42]	S(9): 0.0; S(10): 0.0; S(15): 92.6; T(20): 2.5; S(22): 2.5; S(23): 2.5	Q9H910 1xPhospho [S30(92.6)]	3	1.4	0.000372712	0.33	0.496857	1.08	0.00519934
MASNIFGTPEENQASWAK	Q9UK76	HN1	Hematological and neurological expressed 1 protein	Q9UK76 [47-64]	S(3): 0.0; T(8): 100.0; S(15): 0.0	Q9UK76 1xPhospho [T54(100)]	4	1.91	0.000389547	0.48	0.5204	1.42	0.00521543
LRSPFLQK	Q9UJU6	DBNL	Drebrin-like protein	Q9UJU6 [281-288]	S(3): 100.0	Q9UJU6 1xPhospho [S283(100)]	2	1.94	0.000432817	0.45	0.604209	1.49	0.00533226
LLDFGSLSNLQVTQPTVGMNFKTPR	P0CW22	RPS17; RPS17L	40S ribosomal protein S17-like	P0CW22 [108-132]	S(6): 0.0; S(8): 0.0; T(13): 0.0; T(16): 50.0; T(23): 50.0		1	1.39	0.000242411	0.49	0.224632	0.9	0.00540136
EAPPVVPPLANAISAALVSPATSQSIAPPVPLK	O43683	BUB1	Mitotic checkpoint serine/threonine-protein kinase BUB1	O43683 [357-389]	S(14): 0.0; S(19): 25.0; T(22): 25.0; S(23): 25.0; S(25): 25.0		1	1.3	0.00214949	-0.53	0.512084	1.83	0.00540136
SVEERDSGSFVAFQNIPGSELMSSFAK	P42166	TMPO	Lamina-associated polypeptide 2, isoform alpha	P42166 [436-462]	S(1): 33.3; S(7): 33.3; S(9): 33.3; S(19): 0.0; S(23): 0.0; S(24): 0.0		3	1.18	0.000559617	0.12	0.772518	1.06	0.00540136
LAGASPATVAAAAAAGSGPKDPMAR	Q13045	FLII	Protein flightless-1 homolog	Q13045 [402-426]	S(5): 84.4; T(8): 15.6; S(17): 100.0	Q13045 2xPhospho [S406(84.4); S418(100)]	1	1.05	0.00157055	-0.23	0.677453	1.28	0.00540136
YLSFTPPEKDGFPSGTPALNAK	Q13177	PAK2	Serine/threonine-protein kinase PAK 2	Q13177 [139-160]	Y(1): 49.7; S(3): 49.7; T(5): 0.6; S(14): 99.8; T(16): 0.2	Q13177 2xPhospho [Y/S/T]	3	1.62	0.000452193	2.29	0.000277386	-0.67	0.00543994
GKSSEPVVIMK	P46013	MKI67	Antigen KI-67	P46013 [3039-3049]	S(3): 90.2; S(4): 9.8	P46013 1xPhospho [S3041(90.2)]	1	1.59	0.000244463	0.59	0.221694	1.01	0.00543994
EMFPYEASTPTGISASCRRPIK	P42167	TMPO	Lamina-associated polypeptide 2, isoforms beta/gamma	P42167 [347-368]	Y(5): 0.0; S(8): 0.0; T(9): 0.0; T(11): 0.0; S(14): 89.3; S(16): 10.7	P42167 1xPhospho [S360(89.3)]	2	1.47	0.000264853	0.45	0.265471	1.03	0.00543994
LLEAISSLDGK	Q9BVJ6	UTP14A	U3 small nucleolar RNA-associated protein 14 homolog A	Q9BVJ6 [46-56]	S(6): 4.9; S(7): 95.1	Q9BVJ6 1xPhospho [S52(95.1)]	1	1.31	0.00102882	-0.08	0.903419	1.38	0.00543994
AGGPATPLSPTR	Q03252	LMNB2	Lamin-B2	Q03252 [9-20]	T(6): 9.2; S(9): 89.7; T(11): 1.1		2	1.25	0.000288024	0.35	0.314499	0.88	0.00543994
NRSSAVDPEPQVK	Q5SSJ5	HP1BP3	Heterochromatin protein 1-binding protein 3	Q5SSJ5 [246-258]	S(3): 50.0; S(4): 50.0		3	2.81	0.000862459	0.01	0.999904	2.8	0.00545849
SSRFSGGFGAR	O00571	DDX3X	ATP-dependent RNA helicase DDX3X	O00571 [590-600]	S(1): 2.2; S(2): 2.2; S(5): 95.6	O00571 1xPhospho [S594(95.6)]	1	1.68	0.000225464	0.68	0.17621	1.01	0.00545849
SPDPGIVPQEAPVGNSLSELSEENFDGK	O15027	SEC16A	Protein transport protein Sec16A	O15027 [1844-1871]	S(1): 0.0; S(16): 2.1; S(18): 13.0; S(21): 85.0	O15027 1xPhospho [S1844(100)]	3	1.09	0.00076667	0.04	0.942674	1.04	0.00545849
EGSVLDILKSPGFASPK	P49790	NUP153	Nuclear pore complex protein Nup153	P49790 [605-621]	S(3): 0.0; S(10): 100.0; S(15): 100.0	P49790 2xPhospho [S614(100); S619(100)]	1	1.68	0.000395147	0.43	0.490464	1.25	0.00553787
LEDVKNSPTFK	P55327	TPD52	Tumor protein D52	P55327 [165-175]	S(7): 100.0; T(9): 0.0	P55327 1xPhospho [S171(100)]	1	1.77	0.000144627	0.83	0.0738648	0.94	0.00561159
REPQGISWESPLDEVDK	Q04759	PRKCQ	Protein kinase C theta type	Q04759 [339-355]	S(7): 0.0; S(10): 100.0	Q04759 1xPhospho [S348(100)]	1	1.6	0.000235773	0.6	0.19029	1.01	0.00561159
LDADLLVPASVK	Q8WWQ0	PHIP	PH-interacting protein	Q8WWQ0 [1725-1736]	S(10): 100.0	Q8WWQ0 1xPhospho [S1734(100)]	1	2.38	0.000344905	0.83	0.388128	1.54	0.00562513
YIASVQGSTPSPR	P49792	RANBP2	E3 SUMO-protein ligase RanBP2	P49792 [11-23]	Y(1): 0.0; S(4): 0.0; S(8): 15.6; T(9): 92.2; S(11): 92.2	P49792 2xPhospho [T19(91.5); S21(91.5)]	3	1.98	0.000327357	0.67	0.348522	1.31	0.00562513
RPSYSSSLFGYSPAAATAAAAAGAPALLSPPK	Q8IVW6	ARID3B	AT-rich interactive domain-containing protein 3B	Q8IVW6 [328-359]	S(3): 4.8; Y(4): 17.8; S(5): 17.8; S(6): 17.8; S(7): 17.8; Y(11): 17.8; S(12): 4.9; T(17): 1.5; S(29): 99.8	Q8IVW6 2xPhospho [S356(99.8); Y/S/T]	1	1.33	0.00144546	-0.23	0.759629	1.57	0.00562513
MSVDAVEIETLRK	P78347	GTF2I	General transcription factor II-I	P78347 [102-114]	S(2): 100.0; T(10): 0.0	P78347 1xPhospho [S103(100)]	1	1.75	0.00015751	0.81	0.0844564	0.95	0.00566823
TASISSSPSEGTPTVGSYGCTPQSLPK	Q6PKG0	LARP1	La-related protein 1	Q6PKG0 [845-871]	T(1): 0.0; S(3): 0.0; S(5): 1.4; S(6): 10.2; S(7): 10.2; S(9): 76.8; T(12): 1.4; T(14): 86.6; S(17): 11.6; Y(18): 1.6; T(21): 0.5; S(24): 99.7	Q6PKG0 3xPhospho [S853(76.8); T858(86.6); S868(99.7)]	1	1.16	0.000447927	0.23	0.570768	0.93	0.00567805
SLQTTSPPVVAPGNENGLAVPVPLRK	O94804	STK10	Serine/threonine-protein kinase 10	O94804 [387-412]	S(1): 74.6; T(4): 11.7; T(5): 2.0; S(6): 11.7		1	1.74	0.000137084	0.86	0.0586883	0.88	0.00571097
LHQVVETSHEDLPASQER	O43683	BUB1	Mitotic checkpoint serine/threonine-protein kinase BUB1	O43683 [300-317]	T(7): 0.0; S(8): 0.0; S(15): 100.0	O43683 1xPhospho [S314(100)]	7	1.18	0.00102882	-0.02	0.945307	1.2	0.00571097
LFQLPTPPLSR	Q9Y6K0	CEPT1	Choline/ethanolaminephosphotransferase 1	Q9Y6K0 [35-45]	T(6): 6.5; S(10): 93.5	Q9Y6K0 1xPhospho [S44(93.5)]	1	-0.05	0.745761	-1.37	0.00497353	1.32	0.00571097
EREGAPEPASCVK	Q6IBW4	NCAPH2	Condensin-2 complex subunit H2	Q6IBW4 [299-311]	S(10): 100.0	Q6IBW4 1xPhospho [S308(100)]	1	2.1	0.000137313	1.1	0.05968	1	0.00583752
SALAPNLLTSGK	O15446	CD3EAP	DNA-directed RNA polymerase I subunit RPA34	O15446 [163-174]	S(1): 0.0; T(9): 5.4; S(10): 94.6	O15446 1xPhospho [S172(94.6)]	2	2.14	0.000412432	0.65	0.486267	1.48	0.00590307
SNDIDLEGFDSVVSSTEK	Q96B97	SH3KBP1	SH3 domain-containing kinase-binding protein 1	Q96B97 [458-475]	S(1): 0.0; S(11): 0.0; S(14): 6.9; S(15): 86.2; T(16): 6.9	Q96B97 1xPhospho [S472(86.2)]	2	1.38	0.000264853	0.48	0.230409	0.9	0.00590307
KLGDMRNSATFK	O43399	TPD52L2	Tumor protein D54	O43399 [154-165]	S(8): 90.0; T(10): 10.0	O43399 1xPhospho [S161(90)]	1	1.35	0.000530622	0.25	0.648814	1.1	0.00600336
GGPASVPSSSPGTSVK	O43237	DYNC1LI2	Cytoplasmic dynein 1 light intermediate chain 2	O43237 [398-413]	S(5): 0.0; S(8): 0.1; S(9): 8.9; S(10): 91.0; T(13): 0.0; S(14): 0.0	O43237 1xPhospho [S407(91)]	1	1.7	0.000361871	0.47	0.374536	1.24	0.00603539
SLSRTPETLLPFAEAEAFLK	Q3KQU3	MAP7D1	MAP7 domain-containing protein 1	Q3KQU3 [809-828]	S(1): 33.3; S(3): 33.3; T(5): 33.3; T(8): 0.0		3	1.01	0.00128713	-0.09	0.871262	1.09	0.00604663
SVIDPVPAPVGDSHVDGAAK	Q13177	PAK2	Serine/threonine-protein kinase PAK 2	Q13177 [197-216]	S(1): 100.0; S(13): 0.0	Q13177 1xPhospho [S197(100)]	4	3.28	0.000120872	3.91	0.000172832	-0.63	0.0061064
KSKGESDDFHMDFDSAVAPR	P11388	TOP2A	DNA topoisomerase 2-alpha	P11388 [1490-1509]	S(2): 50.0; S(6): 50.0; S(15): 0.0		2	2.42	0.00054689	0.61	0.638768	1.81	0.00633983
SLLPDFLQTPK	P54132	BLM	Bloom syndrome protein	P54132 [106-116]	S(1): 0.0; T(9): 100.0	P54132 1xPhospho [T114(100)]	1	1.97	0.000479258	0.46	0.556651	1.5	0.00636855
GIPHSLSGLQDPIIAR	Q9ULH0	KIDINS220	Kinase D-interacting substrate of 220 kDa	Q9ULH0 [1627-1642]	S(5): 0.0; S(7): 100.0	Q9ULH0 1xPhospho [S1633(100)]	1	1	0.00545339	-0.7	0.300694	1.7	0.00667681
VCAKPWAPDMTLPGISPPPEK	Q96FF9	CDCA5	Sororin	Q96FF9 [194-214]	T(11): 0.0; S(16): 100.0	Q96FF9 1xPhospho [S209(100)]	2	0.83	0.00132178	-0.04	0.900188	0.86	0.00667681
TQDGVALEIQPLNSQEGIDNEEK	P23634	ATP2B4	Plasma membrane calcium-transporting ATPase 4	P23634 [315-337]	T(1): 0.0; S(14): 100.0	P23634 1xPhospho [S328(100)]	1	0.21	0.371477	1.03	0.00370472	-0.83	0.00670683
LSHSDEKPYQCPVCQQR	P56270	MAZ	Myc-associated zinc finger protein	P56270 [299-315]	S(2): 0.5; S(4): 99.5; Y(9): 0.0	P56270 1xPhospho [S302(99.5)]	2	1.28	0.000671498	0.17	0.742921	1.12	0.00672587
GSPLLGPVVPGPSPIPSVTEK	P49454	CENPF	Centromere protein F	P49454 [2995-3015]	S(2): 100.0; S(13): 100.0; S(17): 0.0; T(19): 0.0	P49454 2xPhospho [S2996(100); S3007(100)]	1	1.06	0.00383845	-0.51	0.41695	1.58	0.00686324
GAMPPAPVPAGTPAPPGPATMMPDGTLGLTPPTTER	Q15233	NONO	Non-POU domain-containing octamer-binding protein	Q15233 [399-434]	T(12): 0.0; T(20): 0.0; T(26): 0.0; T(30): 15.6; T(33): 15.6; T(34): 68.8	Q15233 1xPhospho [T428(80.3)]	9	0.63	0.0144203	-0.7	0.137616	1.33	0.00686324
RPSPLSENVSELK	Q99618	CDCA3	Cell division cycle-associated protein 3	Q99618 [220-232]	S(3): 100.0; S(6): 0.0; S(10): 0.0	Q99618 1xPhospho [S222(100)]	1	0.82	0.00323855	-0.27	0.487799	1.08	0.00686388
RVNSASSSNPPAEVDPDTILK	Q9BY77	POLDIP3	Polymerase delta-interacting protein 3	Q9BY77 [380-400]	S(4): 98.1; S(6): 0.9; S(7): 0.9; S(8): 0.0; T(18): 0.0	Q9BY77 1xPhospho [S383(98.1)]	1	0.8	0.00158271	-0.06	0.836878	0.86	0.00693254
DLKEVTPEGLQMVK	P22234	PAICS	Multifunctional protein ADE2	P22234 [233-246]	T(6): 100.0	P22234 1xPhospho [T238(100)]	2	1.03	0.000783027	0.11	0.819146	0.92	0.00696046
SSGGREDLESSGLQR	Q9UK76	HN1	Hematological and neurological expressed 1 protein	Q9UK76 [70-84]	S(1): 91.1; S(2): 8.9; S(10): 0.0; S(11): 0.0		5	2.02	0.000198616	0.96	0.102053	1.05	0.00704792
IGISDISSLSEK	Q5UIP0	RIF1	Telomere-associated protein RIF1	Q5UIP0 [1700-1711]	S(4): 0.0; S(7): 0.0; S(8): 0.1; S(10): 99.9	Q5UIP0 1xPhospho [S1709(99.9)]	1	1.06	0.000585417	0.19	0.623119	0.87	0.00707376
VGDSTPVSEKPVSAAVDANASESP	Q9H8Y8	GORASP2	Golgi reassembly-stacking protein 2	Q9H8Y8 [429-452]	S(4): 50.0; T(5): 50.0; S(8): 0.0; S(13): 0.0; S(21): 12.4; S(23): 87.6	Q9H8Y8 2xPhospho [S451(87.6); T/S]	4	1.62	0.000422757	0.49	0.410382	1.13	0.00709334
KLENSPLGEALR	Q9NX40	OCIAD1	OCIA domain-containing protein 1	Q9NX40 [104-115]	S(5): 100.0	Q9NX40 1xPhospho [S108(100)]	1	1.5	0.000210322	0.68	0.11483	0.81	0.00709334
FRSPSDEGPGSMGDDGQLSPGVLVR	Q92918	MAP4K1	Mitogen-activated protein kinase kinase kinase kinase 1	Q92918 [403-427]	S(3): 91.0; S(5): 9.0; S(11): 0.0; S(19): 100.0	Q92918 2xPhospho [S405(91); S421(100)]	1	0.75	0.00334483	-0.24	0.496003	1	0.00709334
GAMPPAPVPAGTPAPPGPATMMPDGTLGLTPPTTER	Q15233	NONO	Non-POU domain-containing octamer-binding protein	Q15233 [399-434]	T(12): 0.0; T(20): 0.0; T(26): 0.7; T(30): 80.5; T(33): 15.7; T(34): 3.2	Q15233 1xPhospho [T428(87.2)]	4	0.69	0.0020138	-0.11	0.727585	0.8	0.00709334
LTLEGLEEDDDDRVSPTVLHK	Q9NPB8	GPCPD1	Glycerophosphocholine phosphodiesterase GPCPD1	Q9NPB8 [161-181]	T(2): 0.0; S(15): 13.0; T(17): 87.0	Q9NPB8 1xPhospho [T177(87)]	2	0.2	0.171825	-0.74	0.0244839	0.94	0.00709334
VSEGGPAEIAGLQIGDK	O14907	TAX1BP3	Tax1-binding protein 3	O14907 [60-76]	S(2): 100.0	O14907 1xPhospho [S61(100)]	1	1.39	0.000432966	0.36	0.41913	1.04	0.00714667
KVAGAATPK	P16402	HIST1H1D	Histone H1.3	P16402 [141-149]	T(7): 100.0	P16402 1xPhospho [T147(100)]	2	1.65	0.000185317	0.75	0.0820881	0.9	0.00722122
KSFSTLFLETVK	Q03188	CENPC; CENPC1	Centromere protein C	Q03188 [260-271]	S(2): 99.7; S(4): 0.3; T(5): 0.0; T(10): 0.0	Q03188 1xPhospho [S261(99.7)]	2	1.45	0.000179867	0.7	0.0748786	0.77	0.00722712
QLEESVSEKEQQLLSTLK	O95239	KIF4A	Chromosome-associated kinesin KIF4A	O95239 [947-964]	S(5): 50.0; S(7): 50.0; S(15): 0.0; T(16): 0.0		2	1.22	0.00102022	0.05	0.934721	1.17	0.00722712
QSWPSPAVK	Q86XL3	ANKLE2	Ankyrin repeat and LEM domain-containing protein 2	Q86XL3 [871-879]	S(2): 0.0; S(5): 100.0	Q86XL3 1xPhospho [S875(100)]	1	1.69	0.000841793	0.21	0.827054	1.48	0.00732328
GSVVNVNPTNTRPQSDTPEIR	O95819	MAP4K4	Mitogen-activated protein kinase kinase kinase kinase 4	O95819 [899-919]	S(2): 0.0; T(9): 0.0; T(11): 0.0; S(15): 1.4; T(17): 98.6	O95819 1xPhospho [T915(98.6)]	2	1.53	0.000352265	0.51	0.284128	1.01	0.00733942
EPPADVWTPPAR	Q14258	TRIM25	E3 ubiquitin/ISG15 ligase TRIM25	Q14258 [84-95]	T(8): 100.0	Q14258 1xPhospho [T91(100)]	2	1.18	0.000880251	0.11	0.858516	1.07	0.00733942
RPTSNGVVSSPNSTSRPTLPVK	Q7Z422	SZRD1	SUZ domain-containing protein 1	Q7Z422 [65-86]	T(3): 50.0; S(4): 50.0; S(9): 0.0; S(10): 0.0; S(13): 0.0; T(14): 0.0; S(15): 0.0; T(18): 100.0	Q7Z422 2xPhospho [T82(100); T/S]	1	1.78	0.000569266	0.42	0.572282	1.36	0.00735971
NLEEAAAAEQGGGCDQVDSSPVPR	Q9Y2U8	LEMD3	Inner nuclear membrane protein Man1	Q9Y2U8 [333-356]	S(19): 0.5; S(20): 99.5	Q9Y2U8 1xPhospho [S352(99.5)]	1	1.58	0.000286316	0.59	0.198585	0.99	0.00735971
ISDAHLADTMIGK	Q9Y657	SPIN1	Spindlin-1	Q9Y657 [123-135]	S(2): 100.0; T(9): 0.0	Q9Y657 1xPhospho [S124(100)]	1	0.9	0.000981209	0.06	0.903726	0.84	0.00740024
LENSPLGEALR	Q9NX40	OCIAD1	OCIA domain-containing protein 1	Q9NX40 [105-115]	S(4): 100.0	Q9NX40 1xPhospho [S108(100)]	2	1.23	0.00040731	0.4	0.357735	0.83	0.00745908
SLNAASAMGPAPLISTPPSRPPQVK	Q01826	SATB1	DNA-binding protein SATB1	Q01826 [451-475]	S(1): 0.0; S(6): 0.0; S(15): 33.3; T(16): 33.3; S(19): 33.3		3	1.72	0.000780271	0.32	0.758836	1.41	0.00748892
EGLVPLSVSSGK	Q562F6	SGOL2	Shugoshin-like 2	Q562F6 [1157-1168]	S(7): 0.0; S(9): 94.8; S(10): 5.2	Q562F6 1xPhospho [S1165(94.8)]	2	1.56	0.00121481	0.01	0.986344	1.55	0.00756062
LLASLVK	Q13263	TRIM28	Transcription intermediary factor 1-beta	Q13263 [255-261]	S(4): 100.0	Q13263 1xPhospho [S258(100)]	1	0.49	0.015885	-0.5	0.148844	0.98	0.00756062
RESLGLESK	Q96BH1	RNF25	E3 ubiquitin-protein ligase RNF25	Q96BH1 [448-456]	S(3): 100.0; S(8): 0.0	Q96BH1 1xPhospho [S450(100)]	1	2.44	0.000275836	1.16	0.17381	1.27	0.00773634
GRSSNAYDPSQMCAEK	Q9NRL2	BAZ1A	Bromodomain adjacent to zinc finger domain protein 1A	Q9NRL2 [958-973]	S(3): 50.0; S(4): 50.0; Y(7): 0.0; S(10): 0.0		4	1.74	0.000198616	0.84	0.0876568	0.89	0.00773634
GLEFPMTDLDMLSPIHTPQR	O60784	TOM1	Target of Myb protein 1	O60784 [148-167]	T(7): 0.0; S(13): 100.0; T(17): 0.0	O60784 1xPhospho [S160(100)]	1	1.46	0.000350026	0.53	0.254349	0.92	0.00773634
HRDGGEALVSPDGTVTEAPR	Q96HN2	AHCYL2	Putative adenosylhomocysteinase 3	Q96HN2 [98-117]	S(10): 100.0; T(14): 0.0; T(16): 0.0	Q96HN2 1xPhospho [S107(100)]	1	1.45	0.000697363	0.26	0.667467	1.19	0.00773634
TIGDLSTLTASEIK	Q5UIP0	RIF1	Telomere-associated protein RIF1	Q5UIP0 [2329-2342]	T(1): 0.0; S(6): 0.0; T(7): 0.0; T(9): 0.0; S(11): 100.0	Q5UIP0 1xPhospho [S2339(100)]	3	1.4	0.00104097	0.1	0.902654	1.3	0.00773634
YVAGETNAKENENSSPVAGAFGVFSTISTAVQSTGK	Q9NRY5	FAM114A2	Protein FAM114A2	Q9NRY5 [132-167]	Y(1): 0.0; T(6): 1.9; S(14): 49.0; S(15): 49.0; S(25): 0.0; T(26): 0.0; S(28): 0.0; T(29): 0.0; S(33): 0.0; T(34): 0.0		2	1.33	0.000873236	0.19	0.80592	1.14	0.00773634
KVLPITVPKSPAFALK	Q9ULW0	TPX2	Targeting protein for Xklp2	Q9ULW0 [477-492]	T(6): 0.0; S(10): 100.0	Q9ULW0 1xPhospho [S486(100)]	1	1.31	0.00179954	-0.14	0.845247	1.44	0.00773634
ENRQSIINPDWNFEK	P46459	NSF	Vesicle-fusing ATPase	P46459 [203-217]	S(5): 100.0	P46459 1xPhospho [S207(100)]	1	1.23	0.0023584	1.96	0.0007308	-0.73	0.00773634
ITKPGSIDSNNQLFAPGGRLSWGK	Q04637	EIF4G1	Eukaryotic translation initiation factor 4 gamma 1	Q04637 [1072-1095]	T(2): 0.0; S(6): 0.0; S(9): 0.0; S(21): 100.0	Q04637 1xPhospho [S1092(100)]	1	1.05	0.000566969	0.22	0.538845	0.83	0.00773634
RRSAEDELAMR	Q13868	EXOSC2	Exosome complex component RRP4	Q13868 [122-132]	S(3): 100.0	Q13868 1xPhospho [S124(100)]	2	0.85	0.00607273	-0.51	0.345211	1.36	0.00773634
AVVQSPQVTEVL	Q3KQU3	MAP7D1	MAP7 domain-containing protein 1	Q3KQU3 [830-841]	S(5): 100.0; T(9): 0.0	Q3KQU3 1xPhospho [S834(100)]	2	1.63	0.00073952	0.28	0.694695	1.33	0.00773924
GPSYEDLYTQNVVINMDDQEDLHRASLEGK	P29083	GTF2E1	General transcription factor IIE subunit 1	P29083 [243-272]	S(3): 0.0; Y(4): 0.0; Y(8): 0.0; T(9): 0.0; S(26): 100.0	P29083 1xPhospho [S268(100)]	1	1.13	0.00102882	0.08	0.889955	1.05	0.00778204
VCAKPWAPDMTLPGISPPPEK	Q96FF9	CDCA5	Sororin	Q96FF9 [194-214]	T(11): 0.0; S(16): 100.0	Q96FF9 1xPhospho [S209(100)]	1	1.38	0.000198616	0.64	0.0864319	0.74	0.00780236
EFSPFGTITSAK	P11940	PABPC1	Polyadenylate-binding protein 1	P11940 [313-324]	S(3): 50.0; T(7): 50.0; T(9): 0.0; S(10): 0.0		1	1.92	0.000766521	0.39	0.711703	1.54	0.00781676
TLEPVKPPTVPNDYMTSPAR	Q8IZP0	ABI1	Abl interactor 1	Q8IZP0 [200-219]	T(1): 0.0; T(9): 0.0; Y(14): 0.0; T(16): 12.1; S(17): 87.9	Q8IZP0 1xPhospho [T215(80.5)]	2	1.74	0.00040731	0.62	0.325933	1.12	0.0078324
KLNSPEETAFQTPK	Q9BTX1	NDC1; TMEM48	Nucleoporin NDC1	Q9BTX1 [403-416]	S(4): 100.0; T(8): 0.0; T(12): 100.0	Q9BTX1 2xPhospho [S406(100); T414(100)]	1	1.39	0.000301496	0.52	0.190914	0.87	0.0078869
EPPRASPPGGLAEPPGSAGPQAGPTVVPGSATPMETGIAETPEGR	O60341	KDM1A	Lysine-specific histone demethylase 1A	O60341 [64-108]	S(6): 100.0; S(17): 0.0; T(25): 0.0; S(30): 0.0; T(32): 0.0; T(36): 0.0; T(41): 100.0	O60341 2xPhospho [S69(100); T104(94.7)]	2	1.31	0.000897068	0.16	0.798988	1.16	0.00802818
VNEFGMSGEDPTAAAPVAEVPTAAGALTPTPAPTTTTATR	O96005	CLPTM1	Cleft lip and palate transmembrane protein 1	O96005 [595-634]	S(7): 0.0; T(12): 0.0; T(22): 0.0; T(28): 12.5; T(30): 85.2; T(34): 1.9; T(35): 0.3; T(36): 0.1; T(37): 0.1; T(39): 0.0	O96005 1xPhospho [T624(85.2)]	1	1.27	0.000414439	0.39	0.325946	0.88	0.00806183
RSLLSPK	Q9P0U3	SENP1	Sentrin-specific protease 1	Q9P0U3 [166-172]	S(2): 0.0; S(5): 100.0	Q9P0U3 1xPhospho [S170(99.9)]	2	-0.35	0.245641	0.76	0.0234811	-1.12	0.00806183
VDSPLPSDKAPTPPGK	Q12893	TMEM115	Transmembrane protein 115	Q12893 [318-333]	S(3): 99.9; S(7): 0.1; T(12): 100.0	Q12893 2xPhospho [S320(99.9); T329(100)]	1	1.37	0.000676035	0.29	0.608549	1.07	0.00808196
NPMDVWHNSANK	Q9ULI0	ATAD2B	ATPase family AAA domain-containing protein 2B	Q9ULI0 [1118-1129]	S(9): 100.0	Q9ULI0 1xPhospho [S1126(100)]	1	2.15	7.664e-05	1.47	0.00625781	0.68	0.00816375
DFLAMFSPK	O60711	LPXN	Leupaxin	O60711 [261-269]	S(7): 100.0	O60711 1xPhospho [S267(100)]	1	2.19	0.00045225	0.8	0.370063	1.39	0.00820714
TFNTSTGGLLLPSDTKR	P12956	XRCC6	X-ray repair cross-complementing protein 6	P12956 [302-318]	T(1): 0.9; T(4): 8.3; S(5): 82.6; T(6): 8.3; S(13): 0.0; T(15): 0.0	P12956 1xPhospho [S306(82.6)]	1	1.09	0.00119221	0.04	0.923647	1.05	0.00825561
RTQSSLTVSEVLTR	Q86V48	LUZP1	Leucine zipper protein 1	Q86V48 [992-1005]	T(2): 0.7; S(4): 91.7; S(5): 7.6; T(7): 0.0; S(9): 0.0; T(13): 0.0	Q86V48 1xPhospho [S995(91.7)]	2	1.17	0.000690505	0.25	0.609655	0.92	0.00828006
KTPPAPSPFDLPELK	O95239	KIF4A	Chromosome-associated kinesin KIF4A	O95239 [1180-1194]	T(2): 100.0; S(7): 0.0	O95239 1xPhospho [T1181(100)]	2	1.48	0.000143586	0.76	0.0408148	0.72	0.00837176
RKSEDGTPAEDGTPAATGGSQPPSMGR	Q9BQG0	MYBBP1A	Myb-binding protein 1A	Q9BQG0 [1184-1210]	S(3): 12.2; T(7): 86.0; T(13): 1.8; T(17): 0.0; S(20): 0.0; S(24): 0.0	Q9BQG0 1xPhospho [T1190(86)]	2	1.73	0.00055199	0.51	0.462312	1.22	0.00855963
EGDIIPPLTGATPPLIGHLK	Q12888	TP53BP1	Tumor suppressor p53-binding protein 1	Q12888 [911-930]	T(9): 0.2; T(12): 99.8	Q12888 1xPhospho [T922(99.8)]	3	0.82	0.00211341	-0.08	0.833734	0.9	0.00855963
TTSSQWQSPPVVVILK	Q9UBD5	ORC3	Origin recognition complex subunit 3	Q9UBD5 [205-220]	T(1): 48.7; T(2): 2.5; S(3): 48.7; S(4): 0.0; S(8): 0.0		3	1.67	0.00122804	0.1	0.922772	1.57	0.00857168
LGELTMQLHPVADSSPAGAK	Q8IXM2	C17orf49; RNASEK-C17orf49	Chromatin complexes subunit BAP18	Q8IXM2 [22-41]	T(5): 0.1; S(14): 12.5; S(15): 87.5	Q8IXM2 1xPhospho [S36(87.4)]	1	1.03	0.000597458	0.24	0.494634	0.79	0.00868104
ILSPSMASK	Q9Y6A5	TACC3	Transforming acidic coiled-coil-containing protein 3	Q9Y6A5 [69-77]	S(3): 100.0; S(5): 0.0; S(8): 0.0	Q9Y6A5 1xPhospho [S71(100)]	1	0.59	0.0174927	-0.61	0.167603	1.19	0.00868104
KCSLPAEEDSVLEK	P27816	MAP4	Microtubule-associated protein 4	P27816 [634-647]	S(3): 100.0; S(10): 0.0	P27816 1xPhospho [S636(100)]	3	0.62	0.00490361	-0.21	0.481796	0.83	0.00876616
RYSDKYNVPISSADIAQNQEFYK	Q9H334	FOXP1	Forkhead box protein P1	Q9H334 [438-460]	Y(2): 0.6; S(3): 0.6; Y(6): 32.9; S(11): 32.9; S(12): 32.9; Y(22): 0.0		6	1.11	0.000942098	0.14	0.767563	0.96	0.00879186
GQLTKSPLAQMEEER	Q16181	SEPT7	Septin-7	Q16181 [329-343]	T(4): 10.2; S(6): 89.9	Q16181 1xPhospho [S334(99.8)]	2	1.01	0.000876766	0.13	0.732332	0.87	0.00880696
TRPWLQELSMGSPGPVTNK	Q96N21	ENTHD2	AP-4 complex accessory subunit tepsin	Q96N21 [322-340]	T(1): 0.0; S(9): 0.0; S(12): 100.0; T(17): 0.0	Q96N21 1xPhospho [S333(99.8)]	2	-0.48	0.0711059	0.5	0.0585054	-0.98	0.00880696
SPAAPSPLALR	Q9P270	SLAIN2	SLAIN motif-containing protein 2	Q9P270 [462-472]	S(1): 0.0; S(6): 100.0	Q9P270 1xPhospho [S467(100)]	1	1.28	0.000427578	0.4	0.30061	0.87	0.00899831
ASKPLPPAPAPDEYLVSPITGEK	Q15459	SF3A1	Splicing factor 3A subunit 1	Q15459 [397-419]	S(2): 0.0; Y(14): 0.0; S(17): 100.0; T(20): 0.0	Q15459 1xPhospho [S413(100)]	1	2.13	0.000306704	0.99	0.16744	1.13	0.00901205
AVGSPLCVPAR	Q9NYZ3	GTSE1	G2 and S phase-expressed protein 1	Q9NYZ3 [533-543]	S(4): 100.0	Q9NYZ3 1xPhospho [S536(100)]	1	1.11	0.00167873	-0.06	0.968254	1.17	0.00901205
GYIFLEYASPAHAVDAVK	P55884	EIF3B	Eukaryotic translation initiation factor 3 subunit B	P55884 [231-248]	Y(2): 0.0; Y(7): 0.7; S(9): 99.3	P55884 1xPhospho [S239(99.3)]	1	0.46	0.0189708	-0.4	0.165779	0.86	0.00901205
AVPQNHFLNKTAPK	Q8IYA6	CKAP2L	Cytoskeleton-associated protein 2-like	Q8IYA6 [425-438]	T(11): 100.0	Q8IYA6 1xPhospho [T435(100)]	1	1.13	0.00131932	0.06	0.926499	1.07	0.00903471
GTEAPAVVTEEEDDDEETAPPVIAPRPDHTKSIYTR	Q13177	PAK2	Serine/threonine-protein kinase PAK 2	Q13177 [161-196]	T(2): 0.0; T(9): 0.0; T(18): 0.0; T(30): 1.5; S(32): 1.5; Y(34): 48.6; T(35): 48.6		3	2.07	0.000235773	2.65	0.000271642	-0.58	0.00908722
NKASPAVALPK	Q5FBB7	SGOL1	Shugoshin-like 1	Q5FBB7 [465-475]	S(4): 100.0	Q5FBB7 1xPhospho [S468(100)]	1	0.54	0.01597	-0.46	0.192441	0.99	0.00913451
SLDGAPIGVMDQSLMK	O43491	EPB41L2	Band 4.1-like protein 2	O43491 [550-565]	S(1): 100.0; S(13): 0.0	O43491 1xPhospho [S550(100)]	6	0.52	0.0246751	-0.63	0.138259	1.16	0.00913451
RPTSLPLNTK	Q13873	BMPR2	Bone morphogenetic protein receptor type-2	Q13873 [754-763]	T(3): 5.4; S(4): 94.6; T(9): 0.0	Q13873 1xPhospho [S757(94.6)]	1	2.68	0.000214434	1.53	0.0796738	1.15	0.00915379
IEHYFSPVSK	Q96PZ2	FAM111A	Protein FAM111A	Q96PZ2 [21-30]	Y(4): 0.0; S(6): 100.0; S(9): 0.0	Q96PZ2 1xPhospho [S26(100)]	1	2.2	0.00122804	0.24	0.8835	1.96	0.00915379
ASESSKPWPDATYGTGSASR	Q9Y2W1	THRAP3	Thyroid hormone receptor-associated protein 3	Q9Y2W1 [216-235]	S(2): 0.0; S(4): 0.0; S(5): 0.0; T(12): 0.0; Y(13): 0.1; T(15): 47.3; S(17): 47.3; S(19): 5.4		1	1.1	0.00106917	0.09	0.812179	1.01	0.00915379
AGASIPSSGAASPR	Q9P270	SLAIN2	SLAIN motif-containing protein 2	Q9P270 [52-65]	S(4): 0.0; S(7): 0.0; S(8): 0.0; S(12): 100.0	Q9P270 1xPhospho [S63(100)]	2	1.04	0.000684325	0.22	0.541428	0.82	0.00915379
VAVATPAK	P19338	NCL	Nucleolin	P19338 [72-79]	T(5): 100.0	P19338 1xPhospho [T76(100)]	2	2.21	0.000566969	0.75	0.430068	1.46	0.00918505
KISLSPFSTTDSAYEWK	Q9UPY3	DICER1	Endoribonuclease Dicer	Q9UPY3 [1466-1482]	S(3): 0.0; S(5): 5.9; S(8): 87.8; T(9): 5.9; T(10): 0.4; S(12): 0.0; Y(14): 0.0	Q9UPY3 1xPhospho [S1473(87.8)]	1	1.11	0.00106223	0.12	0.803132	0.99	0.00924315
YVGFGNTPPPQKK	Q8N6T3	ARFGAP1	ADP-ribosylation factor GTPase-activating protein 1	Q8N6T3 [183-195]	Y(1): 0.0; T(7): 100.0	Q8N6T3 1xPhospho [T189(99.9)]	2	0.86	0.00109069	0.09	0.807418	0.77	0.00941478
LLEGEESRISLPLPNFSSLNLR	P08670	VIM	Vimentin	P08670 [403-424]	S(7): 0.2; S(10): 95.6; S(17): 0.8; S(18): 3.5	P08670 1xPhospho [S412(95.6)]	3	0.94	0.000733283	0.16	0.563465	0.78	0.00950831
VLTLSERPLDFLDLERPPTTPQNEEIR	Q9GZY8	MFF	Mitochondrial fission factor	Q9GZY8 [119-145]	T(3): 0.0; S(5): 0.0; T(19): 98.2; T(20): 1.8	Q9GZY8 1xPhospho [T137(98.2)]	1	1.61	0.000873236	0.35	0.677374	1.25	0.00956012
IVNHWASPELR	O15027	SEC16A	Protein transport protein Sec16A	O15027 [130-140]	S(7): 100.0	O15027 1xPhospho [S136(100)]	2	0.54	0.0127148	-0.38	0.249025	0.93	0.00961141
SSGPYGGGGQYFAKPR	P09651	HNRNPA1	Heterogeneous nuclear ribonucleoprotein A1	P09651 [337-352]	S(1): 7.3; S(2): 92.7; Y(5): 0.0; Y(11): 0.0	P09651 1xPhospho [S338(91.8)]	2	1.94	0.0011488	0.27	0.814854	1.67	0.00972805
AEFSAGAWSEPR	Q8N6S5	ARL6IP6	ADP-ribosylation factor-like protein 6-interacting protein 6	Q8N6S5 [57-68]	S(4): 0.0; S(9): 100.0	Q8N6S5 1xPhospho [S65(100)]	2	1.23	0.00151084	0.06	0.950671	1.17	0.00972805
QDSLVINLNR	Q9Y5B9	SUPT16H	FACT complex subunit SPT16	Q9Y5B9 [648-657]	S(3): 100.0	Q9Y5B9 1xPhospho [S650(100)]	1	1.06	0.00101495	0.17	0.737559	0.89	0.0100197
LAGASPATVAAAAAAGSGPKDPMAR	Q13045	FLII	Protein flightless-1 homolog	Q13045 [402-426]	S(5): 50.0; T(8): 50.0; S(17): 0.0		2	1.09	0.00222096	-0.09	0.902654	1.18	0.0101017
IAQVSPGPRDSPAFPDSPWRER	Q9NQS7	INCENP	Inner centromere protein	Q9NQS7 [259-280]	S(5): 100.0; S(11): 100.0; S(17): 100.0	Q9NQS7 3xPhospho [S263(100); S269(100); S275(100)]	1	0.6	0.0182584	-0.58	0.194138	1.19	0.0101477
AFAGPLSPAK	Q86XL3	ANKLE2	Ankyrin repeat and LEM domain-containing protein 2	Q86XL3 [522-531]	S(7): 100.0	Q86XL3 1xPhospho [S528(100)]	1	1.53	0.000595779	0.47	0.411488	1.06	0.0101649
HASPILPITEFSDIPR	P42167	TMPO	Lamina-associated polypeptide 2, isoforms beta/gamma	P42167 [304-319]	S(3): 100.0; T(9): 0.0; S(12): 0.0	P42167 1xPhospho [S306(100)]	2	1.02	0.00331052	-0.22	0.752531	1.25	0.0108501
VFEEATSPGPDLAFLTSCPDKNK	Q9C073	FAM117A	Protein FAM117A	Q9C073 [349-371]	T(6): 9.4; S(7): 90.6; T(16): 0.0; S(17): 0.0	Q9C073 1xPhospho [S355(90.6)]	2	0.52	0.0299576	-0.67	0.14318	1.18	0.0109395
SGSSQELDVKPSASPQER	Q9UQ35	SRRM2	Serine/arginine repetitive matrix protein 2	Q9UQ35 [1539-1556]	S(1): 0.0; S(3): 0.0; S(4): 0.0; S(12): 11.1; S(14): 89.0	Q9UQ35 1xPhospho [S1552(89)]	2	0.3	0.213495	1.02	0.00403346	-0.73	0.0109395
TSNRASDEQIPDPWSQYLQK	Q9Y2L5	TRAPPC8	Trafficking protein particle complex subunit 8	Q9Y2L5 [232-251]	T(1): 0.1; S(2): 0.6; S(6): 99.3; S(15): 0.0; Y(17): 0.0	Q9Y2L5 1xPhospho [S237(99.3)]	2	0.4	0.225878	1.3	0.00417991	-0.89	0.0109627
LSAMLVPVTPEVKPK	P82970	HMGN5	High mobility group nucleosome-binding domain-containing protein 5	P82970 [23-37]	S(2): 0.0; T(9): 100.0	P82970 1xPhospho [T31(100)]	2	1.47	0.000549953	0.46	0.34598	1	0.0110963
TGSPGSEVVTLQQFLEESNK	Q3V6T2	CCDC88A	Girdin	Q3V6T2 [1673-1692]	T(1): 33.3; S(3): 33.3; S(6): 33.3; T(10): 0.0; S(18): 0.0		4	0.69	0.0790083	1.63	0.00302668	-0.94	0.0110963
SGASEANLIVAK	P46013	MKI67	Antigen KI-67	P46013 [648-659]	S(1): 5.1; S(4): 94.9	P46013 1xPhospho [S651(94.9)]	3	2.22	0.000634899	0.84	0.406392	1.38	0.0112234
RRFSDFLGLHSK	O60749	SNX2	Sorting nexin-2	O60749 [182-193]	S(4): 100.0; S(11): 0.0	O60749 1xPhospho [S185(100)]	1	1.42	0.000681652	0.39	0.44926	1.03	0.0112234
LSPPHSPR	Q92974	ARHGEF2	Rho guanine nucleotide exchange factor 2	Q92974 [955-962]	S(2): 100.0; S(6): 0.0	Q92974 1xPhospho [S956(100)]	1	-0.86	0.00563708	0.14	0.555236	-0.99	0.0113465
RNSCNVGGGGGGFKHPAFK	Q7L2J0	MEPCE	7SK snRNA methylphosphate capping enzyme	Q7L2J0 [150-168]	S(3): 100.0	Q7L2J0 1xPhospho [S152(100)]	1	1.17	0.00126617	0.17	0.800248	1.01	0.0113571
AFMESPKQILDSAASLTGSK	P46013	MKI67	Antigen KI-67	P46013 [1675-1694]	S(5): 100.0; S(12): 0.0; S(15): 0.0; T(17): 0.0; S(19): 0.0	P46013 1xPhospho [S1679(100)]	2	0.95	0.0021114	-0.01	0.968628	0.97	0.0114262
TRPSSTVIK	Q5SSJ5	HP1BP3	Heterochromatin protein 1-binding protein 3	Q5SSJ5 [509-517]	T(1): 0.4; S(4): 93.8; S(5): 5.7; T(6): 0.0	Q5SSJ5 1xPhospho [S512(93.8)]	2	4.03	0.00189078	0.18	0.983628	3.85	0.0114685
LQNRISEDVEER	P55081	MFAP1	Microfibrillar-associated protein 1	P55081 [89-100]	S(6): 100.0	P55081 1xPhospho [S94(100)]	1	1.36	0.000366681	0.55	0.169888	0.81	0.0114685
HLAPPPLLSPLLPSIKPTVR	Q14676	MDC1	Mediator of DNA damage checkpoint protein 1	Q14676 [1060-1079]	S(9): 98.5; S(14): 0.8; T(18): 0.8	Q14676 1xPhospho [S1068(98.5)]	1	2.04	0.00117785	0.39	0.750884	1.65	0.0114885
TRPWLQELSMGSPGPVTNK	Q96N21	ENTHD2	AP-4 complex accessory subunit tepsin	Q96N21 [322-340]	T(1): 0.0; S(9): 0.0; S(12): 100.0; T(17): 0.0	Q96N21 1xPhospho [S333(100)]	1	-0.45	0.122308	0.58	0.0534189	-1.03	0.0114885
PTEPTDFLMLFEGSPSGK	Q9UPN4	AZI1; CEP131	Centrosomal protein of 131 kDa	Q9UPN4 [92-109]	T(2): 0.0; T(5): 0.0; S(14): 99.9; S(16): 0.1	Q9UPN4 1xPhospho [S105(99.9)]	3	-0.04	0.863971	0.67	0.0122912	-0.7	0.011541
GNSQLLLS	P46087	NOP2	Probable 28S rRNA (cytosine(4447)-C(5))-methyltransferase	P46087 [805-812]	S(3): 0.0; S(8): 100.0	P46087 1xPhospho [S812(100)]	1	2.2	0.000432966	0.99	0.226621	1.21	0.0115806
ENTGQQNAIISPTVLETSEEK	Q9UPN3	MACF1	Microtubule-actin cross-linking factor 1, isoforms 1/2/3/5	Q9UPN3 [3288-3308]	T(3): 0.0; S(11): 99.9; T(13): 0.1; T(17): 0.0; S(18): 0.0	Q9UPN3 1xPhospho [S3298(99.9)]	2	1.55	0.000198616	0.81	0.0523871	0.74	0.0115806
GFSLEELR	P26373	RPL13	60S ribosomal protein L13	P26373 [75-82]	S(3): 100.0	P26373 1xPhospho [S77(100)]	1	1.05	0.00885111	-0.68	0.402839	1.73	0.0115806
GQEADLEAGGEEVPEANGSAGKR	Q9NX58	LYAR	Cell growth-regulating nucleolar protein	Q9NX58 [226-248]	S(19): 100.0	Q9NX58 1xPhospho [S244(100)]	1	1.47	0.000377823	0.61	0.174302	0.86	0.0115979
AFGPGLQGGSAGSPAR	P21333	FLNA	Filamin-A	P21333 [1072-1087]	S(10): 0.0; S(13): 100.0	P21333 1xPhospho [S1084(100)]	1	0.68	0.00972267	-0.35	0.376917	1.03	0.0115979
ETSLAENIWQEQPHSK	O60566	BUB1B	Mitotic checkpoint serine/threonine-protein kinase BUB1 beta	O60566 [507-522]	T(2): 7.2; S(3): 92.8; S(15): 0.0	O60566 1xPhospho [S509(92.8)]	2	1.31	0.00637611	-0.69	0.529794	2	0.0116008
APSDSSLGTPSDGRPELR	Q15642	TRIP10	Cdc42-interacting protein 4	Q15642 [294-311]	S(3): 98.5; S(5): 89.0; S(6): 12.5; T(9): 0.0; S(11): 0.0	Q15642 2xPhospho [S296(98.5); S298(89)]	1	-0.63	0.0102875	0.08	0.364078	-0.71	0.0116008
SSVKTPETVVPAAPELQPSTSTDQPVTPEPTSR	Q14676	MDC1	Mediator of DNA damage checkpoint protein 1	Q14676 [1522-1554]	S(1): 0.3; S(2): 11.8; T(5): 86.3; T(8): 1.7; S(19): 0.0; T(20): 0.0; S(21): 0.0; T(22): 0.0; T(27): 0.0; T(31): 0.0; S(32): 0.0	Q14676 1xPhospho [T1526(86.3)]	1	-0.89	0.00324266	0.04	0.819746	-0.93	0.0119209
AHVFECNLESSVESIISPK	O60216	RAD21	Double-strand-break repair protein rad21 homolog	O60216 [30-48]	S(10): 0.0; S(11): 0.0; S(14): 0.0; S(17): 100.0	O60216 1xPhospho [S46(100)]	1	1.57	0.00122828	0.27	0.753369	1.29	0.0119397
RPSSTSVPLGDK	Q9NXR1	NDE1	Nuclear distribution protein nudE homolog 1	Q9NXR1 [304-315]	S(3): 0.1; S(4): 0.6; T(5): 0.6; S(6): 98.9	Q9NXR1 1xPhospho [S309(98.8)]	1	0.89	0.00236381	-0.04	0.954222	0.93	0.0119397
SQDPNPQYSPIIK	Q9NP31	SH2D2A	SH2 domain-containing protein 2A	Q9NP31 [209-221]	S(1): 0.0; Y(8): 0.0; S(9): 100.0	Q9NP31 1xPhospho [S217(100)]	1	1.2	0.00139901	0.18	0.81683	1.02	0.0119562
VISGTTLGYLSPK	Q9NUL3	STAU2	Double-stranded RNA-binding protein Staufen homolog 2	Q9NUL3 [430-442]	S(3): 0.0; T(5): 0.0; T(6): 0.0; Y(9): 0.0; S(11): 100.0	Q9NUL3 1xPhospho [S440(100)]	1	1.95	0.00051265	0.79	0.27941	1.16	0.0120816
IVGLDQVTGMTETAFGSAYK	P35580	MYH10	Myosin-10	P35580 [625-644]	T(8): 0.0; T(11): 0.0; T(13): 0.0; S(17): 88.5; Y(19): 11.4	P35580 1xPhospho [S641(88.5)]	1	-0.48	0.0579368	0.4	0.10061	-0.88	0.0120816
IQAQFGPLAQLSPQER	P51692	STAT5B	Signal transducer and activator of transcription 5B	P51692 [182-197]	S(12): 100.0	P51692 1xPhospho [S193(100)]	1	1.14	0.000769829	0.25	0.472037	0.9	0.0122487
SNSRLEDQVIGVALQASK	Q2KHR3	QSER1	Glutamine and serine-rich protein 1	Q2KHR3 [613-630]	S(1): 50.0; S(3): 50.0; S(17): 0.0		2	1.65	9.91491e-05	1.04	0.0106651	0.62	0.0122576
RTSSTCSNESLSVGGTSVTPR	O60343	TBC1D4	TBC1 domain family member 4	O60343 [748-768]	T(2): 0.0; S(3): 0.0; S(4): 0.0; T(5): 0.0; S(7): 100.0; S(10): 0.0; S(12): 0.0; T(16): 0.0; S(17): 0.0; T(19): 0.0	O60343 1xPhospho [S754(100)]	1	-0.63	0.0507326	0.47	0.113176	-1.1	0.0122763
SNSLSEQLAINTSPDAVK	Q5T1M5	FKBP15	FK506-binding protein 15	Q5T1M5 [344-361]	S(1): 4.9; S(3): 4.9; S(5): 90.2; T(12): 0.0; S(13): 0.0		5	1.19	0.000873236	0.27	0.54364	0.92	0.0123273
TPAALAALSLTGSGTPPTAANYPSSSR	Q9UQ35	SRRM2	Serine/arginine repetitive matrix protein 2	Q9UQ35 [2302-2328]	T(1): 0.0; S(9): 0.0; T(11): 0.1; S(13): 49.6; T(15): 49.6; T(18): 0.7; Y(22): 0.0; S(24): 0.0; S(25): 0.0; S(26): 0.0		2	0.99	0.00208838	0.01	0.983339	0.97	0.0124316
GGSISVQVNSIKFDSE	Q14978	NOLC1	Nucleolar and coiled-body phosphoprotein 1	Q14978 [684-699]	S(3): 94.4; S(5): 5.7; S(10): 0.0; S(15): 100.0	Q14978 2xPhospho [S686(94.4); S698(100)]	2	1.58	0.000796589	0.47	0.475292	1.1	0.0125202
AGNPIAHISPHR	Q92918	MAP4K1	Mitogen-activated protein kinase kinase kinase kinase 1	Q92918 [578-589]	S(9): 100.0	Q92918 1xPhospho [S586(100)]	3	1.18	0.00201456	0.05	0.965433	1.14	0.0125202
LLATASFTK	Q8WYP5	AHCTF1	Protein ELYS	Q8WYP5 [2084-2092]	T(4): 0.5; S(6): 99.4; T(8): 0.1	Q8WYP5 1xPhospho [S2089(99.4)]	1	2.09	8.52062e-05	1.47	0.00749075	0.63	0.0125446
DVQSPGFLNEPLSSK	Q8NG31	CASC5	Protein CASC5	Q8NG31 [1073-1087]	S(4): 100.0; S(13): 0.0; S(14): 0.0	Q8NG31 1xPhospho [S1076(100)]	1	0.94	0.00195735	0.03	0.950283	0.92	0.0125926
FNVPVSLESK	P82979	SARNP	SAP domain-containing ribonucleoprotein	P82979 [110-119]	S(6): 100.0; S(9): 0.0	P82979 1xPhospho [S115(100)]	1	1.72	0.000947618	0.44	0.566546	1.28	0.0127941
SEGSPVLPHEPAK	Q9UKE5	TNIK	TRAF2 and NCK-interacting protein kinase	Q9UKE5 [766-778]	S(1): 50.0; S(4): 50.0	Q9UKE5 1xPhospho [S769(91.6)]	4	-1.12	0.00049874	-0.25	0.245059	-0.87	0.0129797
LITPPPPPPSPER	Q96HE9	PRR11	Proline-rich protein 11	Q96HE9 [31-43]	T(3): 100.0; S(10): 100.0	Q96HE9 2xPhospho [T33(100); S40(100)]	2	1.31	0.000965533	0.3	0.563206	1	0.0131782
FICVTPTTCSNTIDLPMSPR	P40763	STAT3	Signal transducer and activator of transcription 3	P40763 [710-729]	T(5): 0.7; T(7): 49.3; T(8): 49.3; S(10): 0.7; T(12): 0.0; S(18): 100.0	P40763 2xPhospho [S727(100); T/S]	3	0.99	0.00104186	0.21	0.612772	0.77	0.0131782
VPVNLLNSPDCDVKTDDSVVPCFMK	P33981	TTK	Dual specificity protein kinase TTK	P33981 [274-298]	S(8): 100.0; T(15): 0.0; S(18): 0.0	P33981 1xPhospho [S281(100)]	1	1.43	0.000692183	0.46	0.382048	0.97	0.0132016
GLAHQLASPGLTTLPEASDVGSITLALR	P42345	MTOR	Serine/threonine-protein kinase mTOR	P42345 [560-587]	S(8): 100.0; T(12): 0.0; T(13): 0.0; S(18): 0.0; S(22): 0.0; T(24): 0.0	P42345 1xPhospho [S567(100)]	1	1.18	0.00155586	0.14	0.816904	1.04	0.0132197
DLRSPLIATPTFVADKDGAR	P49116	NR2C2	Nuclear receptor subfamily 2 group C member 2	P49116 [216-235]	S(4): 100.0; T(9): 0.0; T(11): 0.0	P49116 1xPhospho [S219(100)]	1	0.45	0.112057	-1.21	0.0683187	1.65	0.0132197
KRSESPPAELPSLR	Q14669	TRIP12	E3 ubiquitin-protein ligase TRIP12	Q14669 [308-321]	S(3): 100.0; S(5): 100.0; S(12): 0.0	Q14669 2xPhospho [S310(100); S312(100)]	2	1.21	0.00209921	0.03	0.957391	1.18	0.0133238
RVSHDPFAQQRPYENFQNTEGK	Q13546	RIPK1	Receptor-interacting serine/threonine-protein kinase 1	Q13546 [414-435]	S(3): 100.0; Y(13): 0.0; T(19): 0.0	Q13546 1xPhospho [S416(100)]	1	1.92	0.00086262	0.61	0.492624	1.31	0.0134095
LRLTPQHDQIQTQPLGK	Q9NPI6	DCP1A	mRNA-decapping enzyme 1A	Q9NPI6 [398-414]	T(4): 100.0; T(12): 0.0	Q9NPI6 1xPhospho [T401(100)]	2	0.99	0.00188283	0.07	0.906693	0.93	0.0134095
QAPFRSPTAPSVFSPTGNR	Q9H3P2	NELFA; WHSC2	Negative elongation factor A	Q9H3P2 [220-238]	S(6): 99.8; T(8): 0.2; S(11): 1.3; S(14): 10.5; T(16): 88.2	Q9H3P2 2xPhospho [S225(99.8); S233(87.4)]	3	0.94	0.00185784	0.06	0.90211	0.88	0.0134095
VKEDDLDVVLSPQRR	Q9NRA8	EIF4ENIF1	Eukaryotic translation initiation factor 4E transporter	Q9NRA8 [105-119]	S(11): 100.0	Q9NRA8 1xPhospho [S115(100)]	1	1.39	0.0009414	0.37	0.535066	1.02	0.013442
SFTETMSSLSPGKPWQTK	Q9HB07	C12orf10	UPF0160 protein MYG1, mitochondrial	Q9HB07 [111-128]	S(1): 0.0; T(3): 0.0; T(5): 0.0; S(7): 0.0; S(8): 0.1; S(10): 99.9; T(17): 0.0	Q9HB07 1xPhospho [S120(99.9)]	2	0.42	0.0602528	-0.58	0.111288	1	0.0135922
QEEEAAQQGPVVVSPASDYKDK	O75391	SPAG7	Sperm-associated antigen 7	O75391 [145-166]	S(14): 100.0; S(17): 0.0; Y(19): 0.0	O75391 1xPhospho [S158(100)]	1	1.38	0.000258001	0.68	0.0732674	0.7	0.013861
TPLALAGSPTPK	O95785	WIZ	Protein Wiz	O95785 [989-1000]	T(1): 0.0; S(8): 100.0; T(10): 0.0	O95785 1xPhospho [S996(99.9)]	2	0.62	0.00756473	-0.23	0.556651	0.85	0.0141259
KASPPSGLWSPAYASH	Q8TEM1	NUP210	Nuclear pore membrane glycoprotein 210	Q8TEM1 [1872-1887]	S(3): 100.0; S(6): 0.7; S(10): 49.6; Y(13): 49.6; S(15): 0.0	Q8TEM1 2xPhospho [S1874(100); S/Y]	1	1.14	0.00139436	0.19	0.721838	0.95	0.0144597
LSLVIRSPSLLQSGAK	Q9BQG0	MYBBP1A	Myb-binding protein 1A	Q9BQG0 [1302-1317]	S(2): 100.0; S(7): 100.0; S(9): 0.0; S(13): 0.0	Q9BQG0 2xPhospho [S1303(100); S1308(100)]	2	3.47	0.0013981	1.12	0.722889	2.34	0.0144924
VLPAFRESPSGR	O43166	SIPA1L1	Signal-induced proliferation-associated 1-like protein 1	O43166 [1248-1259]	S(8): 100.0; S(10): 0.0	O43166 1xPhospho [S1255(100)]	1	1.04	0.000790637	0.31	0.409343	0.73	0.0145995
RASLSEIGFGK	Q00537	CDK17	Cyclin-dependent kinase 17	Q00537 [178-188]	S(3): 99.7; S(5): 0.3	Q00537 1xPhospho [S180(99.7)]	5	2.46	0.000233429	1.47	0.0545458	0.99	0.0146028
GAAPTLVPQQPEQVLSSGSPAASEAR	Q14005	IL16	Pro-interleukin-16	Q14005 [890-915]	T(5): 0.0; S(16): 1.7; S(17): 49.1; S(19): 49.1; S(23): 0.1		2	1.41	0.000943261	0.37	0.505932	1.04	0.0146028
KGEISELLVGSPSIR	Q9NW68	BSDC1	BSD domain-containing protein 1	Q9NW68 [156-170]	S(5): 0.0; S(11): 98.9; S(13): 1.1	Q9NW68 1xPhospho [S166(98.9)]	1	0.3	0.089439	-0.53	0.0900828	0.82	0.0146474
THSGEKPYECYICHAR	P49711	CTCF	Transcriptional repressor CTCF	P49711 [400-415]	T(1): 0.1; S(3): 99.9; Y(8): 0.1; Y(11): 0.0	P49711 1xPhospho [S402(99.9)]	2	1.64	0.000745017	0.51	0.377363	1.12	0.0146484
SGSILTSP	Q5HYJ3	FAM76B	Protein FAM76B	Q5HYJ3 [332-339]	S(1): 0.0; S(3): 0.0; T(6): 7.1; S(7): 92.8	Q5HYJ3 1xPhospho [S338(92.8)]	1	1.11	0.00102882	0.22	0.549416	0.9	0.0146484
AEFTSPPSLFK	Q6UN15	FIP1L1	Pre-mRNA 3'-end-processing factor FIP1	Q6UN15 [255-265]	T(4): 4.7; S(5): 95.3; S(8): 0.0	Q6UN15 1xPhospho [S259(99.6)]	7	0.93	0.00203154	0.06	0.90196	0.88	0.0147008
KISSEAWPPVGTPPSSESEPVR	P14317	HCLS1	Hematopoietic lineage cell-specific protein	P14317 [297-318]	S(3): 13.6; S(4): 2.5; T(12): 80.9; S(15): 2.5; S(16): 0.5; S(18): 0.0	P14317 1xPhospho [T308(96.8)]	2	0.92	0.0014512	0.13	0.728747	0.78	0.0147839
RASSASVPAVGASAEGTR	Q9BZ23	PANK2	Pantothenate kinase 2, mitochondrial	Q9BZ23 [166-183]	S(3): 100.0; S(4): 99.9; S(6): 0.1; S(13): 0.0; T(17): 0.0	Q9BZ23 2xPhospho [S168(100); S169(99.9)]	1	0.96	0.00331052	-0.07	0.916302	1.03	0.014836
SMSLDMGQPSQANTK	P21359	NF1	Neurofibromin	P21359 [2521-2535]	S(1): 0.0; S(3): 100.0; S(10): 0.0; T(14): 0.0	P21359 1xPhospho [S2523(100)]	1	1.03	0.00189302	0.09	0.863396	0.94	0.0149133
TPPAAAVSPMQR	Q69YQ0	SPECC1L	Cytospin-A	Q69YQ0 [874-885]	T(1): 0.0; S(8): 100.0	Q69YQ0 1xPhospho [S881(100)]	2	1	0.00395251	1.6	0.00119838	-0.6	0.0149133
SVICDISPLR	Q9UGU0	TCF20	Transcription factor 20	Q9UGU0 [865-874]	S(1): 0.0; S(7): 100.0	Q9UGU0 1xPhospho [S871(100)]	1	0.58	0.00561929	-0.1	0.710774	0.69	0.0149133
VPSPGPPTLTSYSVLR	Q12815	TROAP	Tastin	Q12815 [332-347]	S(3): 100.0; T(8): 0.0; T(10): 0.0; S(11): 0.0; Y(12): 0.0; S(13): 0.0	Q12815 1xPhospho [S334(100)]	2	0.34	0.0535005	-0.42	0.135256	0.77	0.0149409
FAIGSAR	O96017	CHEK2	Serine/threonine-protein kinase Chk2	O96017 [256-262]	S(5): 100.0	O96017 1xPhospho [S260(100)]	1	3.73	0.00103597	1.63	0.538845	2.11	0.0149917
RLSTSPDVIQGHQPR	Q9Y385	UBE2J1	Ubiquitin-conjugating enzyme E2 J1	Q9Y385 [264-278]	S(3): 89.3; T(4): 5.4; S(5): 5.4	Q9Y385 1xPhospho [S268(99)]	8	0.73	0.00904886	-0.29	0.519217	1.01	0.0150218
SGSAAQAEGLCK	Q92685	ALG3	Dol-P-Man:Man(5)GlcNAc(2)-PP-Dol alpha-1,3-mannosyltransferase	Q92685 [11-22]	S(1): 50.0; S(3): 50.0		3	0.14	0.423359	-0.78	0.0294693	0.93	0.0150912
EPLIPASPKAEPIWELPTR	Q9Y613	FHOD1	FH1/FH2 domain-containing protein 1	Q9Y613 [517-535]	S(7): 100.0; T(18): 0.0	Q9Y613 1xPhospho [S523(100)]	1	0.73	0.00321766	-0.03	0.942674	0.76	0.0152944
EEAQSLEDLAGFKELFQTPDHTEESTTDDK	P46013	MKI67	Antigen KI-67	P46013 [2068-2097]	S(5): 0.0; T(18): 100.0; T(22): 0.0; S(25): 0.0; T(26): 0.0; T(27): 0.0	P46013 1xPhospho [T2085(100)]	1	0.97	0.00758622	-0.35	0.599697	1.32	0.0153176
SLSEQPVMDTATATEQAK	P18615	NELFE; RDBP	Negative elongation factor E	P18615 [49-66]	S(1): 6.2; S(3): 93.8; T(10): 0.0; T(12): 0.0; T(14): 0.0		5	1.25	0.000828186	0.39	0.408272	0.86	0.0153791
ISGLGLTPEQK	O95831	AIFM1	Apoptosis-inducing factor 1, mitochondrial	O95831 [99-109]	S(2): 0.0; T(7): 100.0	O95831 1xPhospho [T105(100)]	2	1.96	0.000179878	1.19	0.0302695	0.76	0.0155733
FALKVDSPDVK	Q7Z4V5	HDGFRP2	Hepatoma-derived growth factor-related protein 2	Q7Z4V5 [484-494]	S(7): 100.0	Q7Z4V5 1xPhospho [S490(100)]	1	0.8	0.00355788	-0.05	0.914629	0.84	0.0155733
LFPDTPLALDANK	Q12906	ILF3	Interleukin enhancer-binding factor 3	Q12906 [588-600]	T(5): 100.0	Q12906 1xPhospho [T592(100)]	7	-0.11	0.517692	-1.05	0.00779218	0.95	0.0155733
LSAMLVPVTPEVKPK	P82970	HMGN5	High mobility group nucleosome-binding domain-containing protein 5	P82970 [23-37]	S(2): 0.0; T(9): 100.0	P82970 1xPhospho [T31(100)]	1	1.21	0.00040638	0.5	0.144087	0.71	0.0155984
RTSIHDFLTK	Q3V6T2	CCDC88A	Girdin	Q3V6T2 [1818-1827]	T(2): 89.5; S(3): 10.3; T(9): 0.2	Q3V6T2 1xPhospho [T1819(89.5)]	1	1.57	0.00051265	0.67	0.203351	0.9	0.0158731
SFSLSWR	Q2PPJ7	RALGAPA2	Ral GTPase-activating protein subunit alpha-2	Q2PPJ7 [694-700]	S(1): 0.2; S(3): 90.3; S(5): 9.5	Q2PPJ7 1xPhospho [S696(90.3)]	1	0.96	0.00799783	-0.36	0.590261	1.33	0.0158731
ERPSSAIYPSDSFR	Q92974	ARHGEF2	Rho guanine nucleotide exchange factor 2	Q92974 [118-131]	S(4): 0.4; S(5): 99.6; Y(8): 0.0; S(10): 0.0; S(12): 0.0	Q92974 1xPhospho [S129(100)]	3	1.34	0.000293057	0.65	0.0817752	0.69	0.0159485
VSYRASQPDLVDTPTSSKPQPK	P46013	MKI67	Antigen KI-67	P46013 [1735-1756]	S(2): 87.4; Y(3): 11.1; S(6): 1.5; T(13): 98.0; T(15): 1.7; S(16): 0.3; S(17): 0.0	P46013 2xPhospho [S1736(87.4); T1747(98)]	1	1.33	0.00163127	0.25	0.742214	1.09	0.016031
SAMPFTASPASSTTAR	O00151	PDLIM1	PDZ and LIM domain protein 1	O00151 [123-138]	S(1): 0.0; T(6): 10.4; S(8): 89.6; S(11): 0.0; S(12): 0.0; T(13): 0.0; T(14): 0.0	O00151 1xPhospho [S130(89.6)]	1	1.25	0.0023818	0.15	0.922772	1.1	0.0161287
GVLHTFSPSPK	Q86YP4	GATAD2A	Transcriptional repressor p66-alpha	Q86YP4 [540-550]	T(5): 0.0; S(7): 93.9; S(9): 6.1	Q86YP4 1xPhospho [S548(100)]	3	1.86	0.000808084	0.67	0.369712	1.19	0.0162587
HMLVHSGERPYK	Q92766	RREB1	Ras-responsive element-binding protein 1	Q92766 [115-126]	S(6): 100.0; Y(11): 0.0	Q92766 1xPhospho [S120(100)]	1	1.81	0.00147929	0.39	0.687834	1.41	0.0163203
ILDPEGLALGAVIASSKK	Q8IY81	FTSJ3	pre-rRNA processing protein FTSJ3	Q8IY81 [662-679]	S(15): 90.7; S(16): 9.3	Q8IY81 1xPhospho [S676(90.7)]	1	2.26	0.000965974	0.83	0.45602	1.43	0.0165391
RKSEDGTPAEDGTPAATGGSQPPSMGR	Q9BQG0	MYBBP1A	Myb-binding protein 1A	Q9BQG0 [1184-1210]	S(3): 0.0; T(7): 0.0; T(13): 100.0; T(17): 0.0; S(20): 0.0; S(24): 0.0	Q9BQG0 1xPhospho [T1196(100)]	1	1.92	0.00055199	0.86	0.218275	1.05	0.0165391
SMEVKPAQASHTNYLLMR	Q12789	GTF3C1	General transcription factor 3C polypeptide 1	Q12789 [1632-1649]	S(1): 100.0; S(10): 0.0; T(12): 0.0; Y(14): 0.0	Q12789 1xPhospho [S1632(100)]	1	1.33	0.00151597	0.24	0.691117	1.08	0.0165802
GSESPEMGPEVTPAPR	P48382	RFX5	DNA-binding protein RFX5	P48382 [182-197]	S(2): 94.4; S(4): 5.6; T(12): 0.0	P48382 1xPhospho [S183(94.4)]	2	0.87	0.00505044	-0.13	0.807226	1	0.0165802
KLDLDNSGSLSVEEFMSLPELQQNPLVQR	P63098	PPP3R1	Calcineurin subunit B type 1	P63098 [29-57]	S(7): 33.2; S(9): 33.2; S(11): 33.2; S(17): 0.3		3	0.78	0.00315562	0	0.984511	0.78	0.0165802
TFNTSTGGLLLPSDTK	P12956	XRCC6	X-ray repair cross-complementing protein 6	P12956 [302-317]	T(1): 0.5; T(4): 92.9; S(5): 0.5; T(6): 6.3; S(13): 0.0; T(15): 0.0	P12956 1xPhospho [T305(92.8)]	1	1.33	0.000498952	0.54	0.18537	0.79	0.0166146
FDPAMFNISPGAVQF	Q8IVD9	NUDCD3	NudC domain-containing protein 3	Q8IVD9 [347-361]	S(9): 100.0	Q8IVD9 1xPhospho [S355(100)]	3	0.95	0.000866702	0.28	0.39835	0.68	0.0166229
RVSFADPIYQAGLADDIDR	Q5UIP0	RIF1	Telomere-associated protein RIF1	Q5UIP0 [2203-2221]	S(3): 100.0; Y(9): 0.0	Q5UIP0 1xPhospho [S2205(100)]	1	1.29	0.00166929	0.23	0.727585	1.06	0.017027
KEQDSWSEAGGILFK	Q13111	CHAF1A	Chromatin assembly factor 1 subunit A	Q13111 [220-234]	S(5): 50.0; S(7): 50.0		1	1.78	0.000351433	0.91	0.101485	0.87	0.0170295
QTELFAHFIQPAAQKTPTSPLK	O60264	SMARCA5	SWI/SNF-related matrix-associated actin-dependent regulator of chromatin subfamily A member 5	O60264 [98-119]	T(2): 0.0; T(16): 8.9; T(18): 82.2; S(19): 8.9	O60264 1xPhospho [T115(82.2)]	1	-1.41	0.000432966	-0.33	0.148535	-1.08	0.0170632
LAEALPKQSVDGK	P20290	BTF3	Transcription factor BTF3	P20290 [165-177]	S(9): 100.0	P20290 1xPhospho [S173(100)]	1	0.43	0.0247947	-0.33	0.279441	0.76	0.0171073
RGSLSQEMAK	Q8NFC6	BOD1L1	Biorientation of chromosomes in cell division protein 1-like 1	Q8NFC6 [1075-1084]	S(3): 100.0; S(5): 0.1	Q8NFC6 1xPhospho [S1077(100)]	1	2.5	0.000405262	1.4	0.127769	1.12	0.0171433
GEWFLLGSPGS	Q96T76	MMS19	MMS19 nucleotide excision repair protein homolog	Q96T76 [1020-1030]	S(8): 100.0; S(11): 0.0	Q96T76 1xPhospho [S1027(100)]	3	1.09	0.00336174	-0.01	0.976758	1.1	0.0171433
LAPAPPATPAPAGTPGPILIPK	Q86Y97	SUV420H2	Histone-lysine N-methyltransferase SUV420H2	Q86Y97 [409-430]	T(8): 100.0; T(14): 100.0	Q86Y97 2xPhospho [T416(100); T422(100)]	1	1.04	0.00363466	-0.02	0.950671	1.06	0.0171433
KGSVVNVNPTNTRPQSDTPEIR	O95819	MAP4K4	Mitogen-activated protein kinase kinase kinase kinase 4	O95819 [898-919]	S(3): 0.0; T(10): 0.2; T(12): 1.2; S(16): 49.3; T(18): 49.3		1	1.03	0.00208579	0.1	0.837624	0.94	0.0171433
ESLPVSGEESQLTPEK	Q9UKA4	AKAP11	A-kinase anchor protein 11	Q9UKA4 [969-984]	S(2): 0.0; S(6): 0.0; S(10): 0.0; T(13): 100.0	Q9UKA4 1xPhospho [T981(100)]	1	0.06	0.824398	0.88	0.0119311	-0.82	0.0171433
DSVVSLESQKTPADPK	Q8NEF9	SRFBP1	Serum response factor-binding protein 1	Q8NEF9 [211-226]	S(2): 0.0; S(5): 0.0; S(8): 0.0; T(11): 100.0	Q8NEF9 1xPhospho [T221(100)]	1	2.03	0.000904596	0.74	0.406392	1.3	0.0171473
RGPNYTSGYGTNSELSNPSETESER	P51114	FXR1	Fragile X mental retardation syndrome-related protein 1	P51114 [391-415]	Y(5): 0.0; T(6): 0.0; S(7): 0.0; Y(9): 0.0; T(11): 0.0; S(13): 0.0; S(16): 100.0; S(19): 99.8; T(21): 0.2; S(23): 0.0	P51114 2xPhospho [S406(100); S409(99.8)]	2	-0.37	0.0968361	0.39	0.103185	-0.76	0.0172244
AASADSTTEGTPADGFTVLSTK	O75367	H2AFY	Core histone macro-H2A.1	O75367 [168-189]	S(3): 0.0; S(6): 0.0; T(7): 0.0; T(8): 0.0; T(11): 99.9; T(17): 0.1; S(20): 0.0; T(21): 0.0	O75367 1xPhospho [T178(99.9)]	2	-0.91	0.00469726	0.06	0.862971	-0.98	0.0172458
RSEGFSMDR	Q7Z4V5	HDGFRP2	Hepatoma-derived growth factor-related protein 2	Q7Z4V5 [453-461]	S(2): 100.0; S(6): 0.0	Q7Z4V5 1xPhospho [S454(100)]	1	1.99	0.000149448	1.28	0.0215114	0.72	0.0173289
NSSSPVSPASVPGQR	Q9H1B7	IRF2BPL	Interferon regulatory factor 2-binding protein-like	Q9H1B7 [656-670]	S(2): 0.0; S(3): 0.1; S(4): 0.1; S(7): 99.7; S(10): 0.1		3	-0.53	0.0167938	0.14	0.383747	-0.66	0.0173289
EGQWDCSACLVQNEGSSTK	P49792	RANBP2	E3 SUMO-protein ligase RanBP2	P49792 [1480-1498]	S(7): 100.0; S(16): 0.0; S(17): 0.0; T(18): 0.0	P49792 1xPhospho [S1486(100)]	1	0.61	0.0219081	1.23	0.00248009	-0.62	0.0173905
GKELSDQATASPIVAR	Q5JSH3	WDR44	WD repeat-containing protein 44	Q5JSH3 [86-101]	S(5): 0.0; T(9): 1.1; S(11): 98.9	Q5JSH3 1xPhospho [S96(98.9)]	2	0.77	0.00360808	-0.03	0.964785	0.8	0.017491
KQPPVSPGTALVGSQK	P17096	HMGA1	High mobility group protein HMG-I/HMG-Y	P17096 [31-46]	S(6): 99.9; T(9): 0.1; S(14): 0.0		18	1.64	0.000500011	0.72	0.173508	0.92	0.0177461
DDSLDLSPQGRLSDVLK	Q14669	TRIP12	E3 ubiquitin-protein ligase TRIP12	Q14669 [985-1001]	S(3): 0.6; S(7): 99.4; S(13): 100.0	Q14669 2xPhospho [S991(99.4); S997(100)]	1	1.57	0.00140517	0.38	0.603482	1.18	0.018
NQSFCPTVNLDK	P46776	RPL27A	60S ribosomal protein L27a	P46776 [66-77]	S(3): 99.7; T(7): 0.3	P46776 1xPhospho [S68(99.7)]	1	0.51	0.0205564	-0.29	0.347002	0.8	0.0182866
DVRNSDMHLLDLESMGK	Q9Y3P9	RABGAP1	Rab GTPase-activating protein 1	Q9Y3P9 [356-372]	S(5): 100.0; S(14): 0.0	Q9Y3P9 1xPhospho [S360(100)]	2	1.97	0.000265558	2.49	0.0003038	-0.51	0.0185219
GQLTKSPLAQMEEERR	Q16181	SEPT7	Septin-7	Q16181 [329-344]	T(4): 9.2; S(6): 90.8	Q16181 1xPhospho [S334(90.8)]	1	0.97	0.00192219	0.14	0.75284	0.82	0.0189527
VSLLGPVTTPEHQLLK	Q9H0H5	RACGAP1	Rac GTPase-activating protein 1	Q9H0H5 [572-587]	S(2): 0.0; T(8): 50.0; T(9): 50.0		4	0.7	0.0125621	-0.36	0.514519	1.06	0.0189857
LSAMLVPVTPEVK	P82970	HMGN5	High mobility group nucleosome-binding domain-containing protein 5	P82970 [23-35]	S(2): 0.0; T(9): 100.0	P82970 1xPhospho [T31(100)]	1	1.31	0.0023818	0.13	0.846029	1.17	0.019262
AAGGAPSPPPPVRR	Q4KMP7	TBC1D10B	TBC1 domain family member 10B	Q4KMP7 [672-685]	S(7): 100.0	Q4KMP7 1xPhospho [S678(100)]	6	-0.91	0.00112449	-0.18	0.46579	-0.72	0.019262
SADFSQSTSIGIK	Q9NVI1	FANCI	Fanconi anemia group I protein	Q9NVI1 [726-738]	S(1): 24.4; S(5): 24.4; S(7): 24.4; T(8): 24.4; S(9): 2.6		1	2.3	0.0734263	3.71	0.003917	-1.41	0.0193854
RLSELGITQADDNLMSQEMFVGIVGNQFK	Q8NEM2	SHCBP1	SHC SH2 domain-binding protein 1	Q8NEM2 [632-660]	S(3): 89.7; T(8): 10.3; S(16): 0.0	Q8NEM2 1xPhospho [S634(89.7)]	1	0.99	0.00863451	-0.31	0.661674	1.3	0.0194986
MDMSLDDIIK	Q86V81	ALYREF	THO complex subunit 4	Q86V81 [5-14]	S(4): 100.0	Q86V81 1xPhospho [S8(100)]	2	0.73	0.00305548	0.03	0.941906	0.68	0.0194986
ANNPEQNRLSECEEQAK	Q7KZF4	SND1	Staphylococcal nuclease domain-containing protein 1	Q7KZF4 [141-157]	S(10): 100.0	Q7KZF4 1xPhospho [S150(100)]	1	2.04	0.000904596	2.7	0.0007308	-0.67	0.019517
SKGESDDFHMDFDSAVAPR	P11388	TOP2A	DNA topoisomerase 2-alpha	P11388 [1491-1509]	S(1): 87.8; S(5): 12.3; S(14): 0.0	P11388 1xPhospho [S1491(87.8)]	1	0.69	0.0119786	-0.26	0.543088	0.95	0.019517
RAISTPETPLTK	Q14181	POLA2	DNA polymerase alpha subunit B	Q14181 [123-134]	S(4): 0.2; T(5): 99.8; T(8): 99.8; T(11): 0.2	Q14181 2xPhospho [T127(99.8); T130(99.8)]	1	2.09	0.000129914	1.35	0.0146106	0.73	0.0196649
AGGPTTPLSPTR	P20700	LMNB1	Lamin-B1	P20700 [15-26]	T(5): 1.2; T(6): 97.6; S(9): 99.8; T(11): 1.4	P20700 2xPhospho [T20(98.6); S23(98.6)]	6	2.04	0.00102882	0.76	0.410833	1.29	0.0196649
SVSLTGAPESVQK	Q92945	KHSRP	Far upstream element-binding protein 2	Q92945 [191-203]	S(1): 0.5; S(3): 0.0; T(5): 99.5; S(10): 0.0	Q92945 1xPhospho [T195(99.5)]	1	1.63	0.000417059	0.8	0.120186	0.83	0.0196649
RDPALNSGVSQKPDPAK	P11388	TOP2A	DNA topoisomerase 2-alpha	P11388 [1443-1459]	S(7): 0.0; S(10): 100.0	P11388 1xPhospho [S1452(100)]	1	0.31	0.0691756	-0.4	0.150032	0.71	0.0196649
PLEGSSSEDSPPEGQAPPSHSPR	Q12789	GTF3C1	General transcription factor 3C polypeptide 1	Q12789 [1836-1858]	S(5): 0.0; S(6): 0.0; S(7): 0.0; S(10): 0.0; S(19): 8.6; S(21): 91.4	Q12789 1xPhospho [S1854(98.8)]	3	-0.04	0.855214	0.59	0.0209227	-0.64	0.0196649
DGFPSGTPALNAK	Q13177	PAK2	Serine/threonine-protein kinase PAK 2	Q13177 [148-160]	S(5): 50.0; T(7): 50.0	Q13177 1xPhospho [S152(99.4)]	4	1.23	0.00545339	1.92	0.00155968	-0.69	0.0198564
SQPDKLQTLSPALK	Q13415	ORC1	Origin recognition complex subunit 1	Q13415 [278-291]	S(1): 0.0; T(8): 0.0; S(10): 100.0	Q13415 1xPhospho [S287(100)]	2	1.62	0.000339357	0.84	0.0802348	0.78	0.0198671
LQANLTFDPAALLPGASPKSPGLK	Q6JBY9	RCSD1	CapZ-interacting protein	Q6JBY9 [89-112]	T(6): 0.0; S(17): 100.0; S(20): 100.0	Q6JBY9 2xPhospho [S105(100); S108(100)]	4	1.88	0.000246461	1.13	0.0448835	0.75	0.0201082
RLSSASTGKPPLSVEDDFEK	O75152	ZC3H11A	Zinc finger CCCH domain-containing protein 11A	O75152 [756-775]	S(3): 93.3; S(4): 6.7; S(6): 0.0; T(7): 0.0; S(13): 0.0	O75152 1xPhospho [S758(93.3)]	4	1.26	0.000270124	0.66	0.0550163	0.6	0.0201095
IILDLISESPIKGR	P61978	HNRNPK	Heterogeneous nuclear ribonucleoprotein K	P61978 [208-221]	S(7): 0.0; S(9): 100.0	P61978 1xPhospho [S216(99.9)]	7	0.59	0.00709661	-0.09	0.766982	0.68	0.0201095
LPSDEDESGTEESDNTPLLK	Q9ULH0	KIDINS220	Kinase D-interacting substrate of 220 kDa	Q9ULH0 [1519-1538]	S(3): 0.1; S(8): 50.0; T(10): 50.0; S(13): 0.0; T(16): 0.0		4	-1.15	0.000745017	-0.24	0.266744	-0.91	0.0201095
AAVESPVPKPSEAR	Q8N9M5	TMEM102	Transmembrane protein 102	Q8N9M5 [242-255]	S(5): 100.0; S(11): 0.0	Q8N9M5 1xPhospho [S246(100)]	1	0.88	0.00268487	0.08	0.870004	0.8	0.0204643
LLSNSQTLGNDMLMNTPR	Q9BVW5	TIPIN	TIMELESS-interacting protein	Q9BVW5 [218-235]	S(3): 1.0; S(5): 9.0; T(7): 90.1; T(16): 0.0	Q9BVW5 1xPhospho [T224(99.2)]	2	0.16	0.354709	-0.62	0.0456025	0.78	0.0204643
KPLEIRSPSAESK	Q96B01	RAD51AP1	RAD51-associated protein 1	Q96B01 [288-300]	S(7): 50.0; S(9): 50.0; S(12): 0.1	Q96B01 1xPhospho [S294(93.8)]	3	1.45	0.00040731	0.75	0.107863	0.69	0.0208031
TIPSWATLSASQLAR	Q5SSJ5	HP1BP3	Heterochromatin protein 1-binding protein 3	Q5SSJ5 [132-146]	T(1): 0.0; S(4): 0.0; T(7): 0.0; S(9): 0.1; S(11): 100.0	Q5SSJ5 1xPhospho [S142(100)]	2	0.65	0.0124679	-0.25	0.560004	0.9	0.0208031
LILTLT	Q9UNX4	WDR3	WD repeat-containing protein 3	Q9UNX4 [938-943]	T(4): 0.0; T(6): 100.0	Q9UNX4 1xPhospho [T943(100)]	1	1.82	0.0016677	0.49	0.621263	1.33	0.0209309
AGLSPAEPLLSR	O95402	MED26	Mediator of RNA polymerase II transcription subunit 26	O95402 [358-369]	S(4): 100.0; S(11): 0.0	O95402 1xPhospho [S361(100)]	1	0.95	0.00159855	0.23	0.59954	0.72	0.0209309
RKSHEAEVLK	P16949	STMN1	Stathmin	P16949 [61-70]	S(3): 100.0	P16949 1xPhospho [S63(100)]	1	2.87	0.000231097	1.91	0.0358527	0.94	0.0209404
ILSQSTDSLNMR	Q92974	ARHGEF2	Rho guanine nucleotide exchange factor 2	Q92974 [170-181]	S(3): 48.7; S(5): 48.7; T(6): 2.6; S(8): 0.0		6	1.53	0.000190286	0.92	0.0254795	0.61	0.0210609
LEEPEEPKVLTPEEQLADK	O75822	EIF3J	Eukaryotic translation initiation factor 3 subunit J	O75822 [99-117]	T(11): 100.0	O75822 1xPhospho [T109(100)]	1	1.07	0.00332401	0.07	0.93974	1.01	0.0210759
RPLAPSGRSPVEGLGR	Q9Y5U2	TSSC4	Protein TSSC4	Q9Y5U2 [124-139]	S(6): 1.6; S(9): 98.4	Q9Y5U2 1xPhospho [S132(98.4)]	1	0.53	0.0103195	-0.13	0.63655	0.66	0.0210946
SESSDFEVVPK	Q9Y520	PRRC2C	Protein PRRC2C	Q9Y520 [1246-1256]	S(1): 33.3; S(3): 33.3; S(4): 33.3		3	-0.14	0.477611	0.5	0.0368999	-0.64	0.0211378
SDVSPIIQPVPSIK	P40818	USP8	Ubiquitin carboxyl-terminal hydrolase 8	P40818 [389-402]	S(1): 94.1; S(4): 5.9; S(12): 0.0	P40818 1xPhospho [S389(95.6)]	3	1.32	0.00189302	0.31	0.677349	1.01	0.0216524
RLASTSDIEEK	O14974	PPP1R12A	Protein phosphatase 1 regulatory subunit 12A	O14974 [504-514]	S(4): 3.1; T(5): 48.5; S(6): 48.5		2	1.18	0.000820873	0.45	0.279407	0.73	0.0217898
ELGSPEGVLVCPSIEELK	Q504Q3	PAN2	PAB-dependent poly(A)-specific ribonuclease subunit PAN2	Q504Q3 [788-805]	S(4): 100.0; S(13): 0.0	Q504Q3 1xPhospho [S791(100)]	1	1.9	0.00171801	0.54	0.622451	1.37	0.02182
HAQDSDPRSPTLGIAR	Q99618	CDCA3	Cell division cycle-associated protein 3	Q99618 [60-75]	S(5): 100.0; S(9): 91.0; T(11): 9.0	Q99618 2xPhospho [S64(100); S68(91)]	1	1.3	0.00389401	0.04	0.982872	1.26	0.0218298
KLLEDTLFPSSKK	Q96JM3	CHAMP1	Chromosome alignment-maintaining phosphoprotein 1	Q96JM3 [606-618]	T(6): 0.0; S(10): 93.3; S(11): 6.7	Q96JM3 1xPhospho [S615(93.3)]	1	1.92	0.00122804	0.69	0.45097	1.23	0.0218796
RKSELEFETLK	Q5JSH3	WDR44	WD repeat-containing protein 44	Q5JSH3 [260-270]	S(3): 99.9; T(9): 0.1	Q5JSH3 1xPhospho [S262(99.9)]	1	0.49	0.042539	-0.5	0.240288	0.99	0.0219496
TSPLNSSGSSQGR	P51003	PAPOLA	Poly(A) polymerase alpha	P51003 [544-556]	T(1): 0.8; S(2): 99.2; S(6): 0.0; S(7): 0.0; S(9): 0.0; S(10): 0.0	P51003 1xPhospho [S545(99.2)]	1	-0.94	0.00590266	0.05	0.881707	-1	0.0219496
ILDPEGLALGAVIASSK	Q8IY81	FTSJ3	pre-rRNA processing protein FTSJ3	Q8IY81 [662-678]	S(15): 50.0; S(16): 50.0		2	1.72	0.000876766	0.7	0.304932	1.03	0.0221197
SDDMFTFHGPGK	P49792	RANBP2	E3 SUMO-protein ligase RanBP2	P49792 [1128-1139]	S(1): 100.0; T(6): 0.0	P49792 1xPhospho [S1128(100)]	1	1.23	0.00108929	0.41	0.386133	0.82	0.0223536
SSDSWEVWGSASTNRNSNSDGGEGGEGTK	Q8N6T3	ARFGAP1	ADP-ribosylation factor GTPase-activating protein 1	Q8N6T3 [360-388]	S(1): 0.0; S(2): 0.0; S(4): 0.0; S(10): 1.7; S(12): 10.3; T(13): 10.3; S(17): 67.5; S(19): 10.3; T(28): 0.0		1	1.35	0.00282568	2.01	0.00128053	-0.65	0.0223734
SADFNPDFVFTEK	Q96GQ7	DDX27	Probable ATP-dependent RNA helicase DDX27	Q96GQ7 [79-91]	S(1): 100.0; T(11): 0.0	Q96GQ7 1xPhospho [S79(100)]	1	2.12	0.00137235	0.75	0.48974	1.38	0.0225224
RVPLSPLSLLAGPADAR	Q53ET0	CRTC2	CREB-regulated transcription coactivator 2	Q53ET0 [429-445]	S(5): 100.0; S(8): 0.0	Q53ET0 1xPhospho [S433(100)]	1	0.99	0.00465069	-0.02	0.976564	1.01	0.0227045
AGVVNGTGAPGQSPGAGR	Q13330	MTA1	Metastasis-associated protein MTA1	Q13330 [374-391]	T(7): 0.0; S(13): 100.0	Q13330 1xPhospho [S386(100)]	1	1.08	0.000696681	0.42	0.214954	0.66	0.022768
TPTPSTPGDTQPNTPAPVPPAEDGIK	Q14839	CHD4	Chromodomain-helicase-DNA-binding protein 4	Q14839 [1540-1565]	T(1): 0.0; T(3): 0.0; S(5): 0.0; T(6): 0.1; T(10): 99.9; T(14): 100.0	Q14839 2xPhospho [T1549(99.8); T1553(100)]	1	-0.52	0.0299903	0.22	0.325587	-0.74	0.0227784
SASVSSISLTK	Q07889	SOS1	Son of sevenless homolog 1	Q07889 [1132-1142]	S(1): 1.3; S(3): 87.4; S(5): 9.9; S(6): 1.3; S(8): 0.2; T(10): 0.0	Q07889 1xPhospho [S1134(87.4)]	1	0.57	0.0267092	-0.36	0.361124	0.92	0.0232499
GSALGTPAAAEPVTPTSK	P00519	ABL1	Tyrosine-protein kinase ABL1	P00519 [839-856]	S(2): 0.0; T(6): 0.0; T(14): 33.3; T(16): 33.3; S(17): 33.3		1	1.57	0.000445701	0.79	0.111408	0.78	0.0235181
SSLLPTDYLVEINK	P46939	UTRN	Utrophin	P46939 [1865-1878]	S(1): 5.2; S(2): 5.2; T(6): 5.2; Y(8): 84.3	P46939 1xPhospho [Y1872(84.3)]	4	4.15	0.000119993	4.66	0.00025603	-0.51	0.0236116
HKSIAEVSQNLR	Q7Z2Z1	TICRR	Treslin	Q7Z2Z1 [863-874]	S(3): 9.4; S(8): 90.7	Q7Z2Z1 1xPhospho [S870(90.6)]	1	1.48	0.0024452	0.32	0.757807	1.16	0.0236116
SIPLECPLSSPK	Q92667	AKAP1	A-kinase anchor protein 1, mitochondrial	Q92667 [142-153]	S(1): 0.0; S(9): 0.0; S(10): 100.0	Q92667 1xPhospho [S151(99.9)]	3	1.35	0.000462736	0.65	0.119021	0.7	0.0236116
VKVEEEEEEKVAEEEETSVK	Q9Y2X3	NOP58	Nucleolar protein 58	Q9Y2X3 [466-485]	T(17): 12.2; S(18): 87.8	Q9Y2X3 1xPhospho [S483(87.8)]	1	0.99	0.00180191	0.21	0.610431	0.79	0.0236116
SATLSGSATNLASLTAALAK	Q9NQT8	KIF13B	Kinesin-like protein KIF13B	Q9NQT8 [1791-1810]	S(1): 0.0; T(3): 0.0; S(5): 6.7; S(7): 6.7; T(9): 86.7; S(13): 0.0; T(15): 0.0	Q9NQT8 1xPhospho [T1799(86.7)]	3	-0.06	0.847981	0.77	0.0244839	-0.83	0.0236116
KPSDEEFASR	Q14155	ARHGEF7	Rho guanine nucleotide exchange factor 7	Q14155 [692-701]	S(3): 99.4; S(9): 0.6	Q14155 1xPhospho [S694(99.4)]	1	1.99	0.000717926	0.95	0.214307	1.04	0.023618
KLPATTATPDSSKTEMDSR	Q96B97	SH3KBP1	SH3 domain-containing kinase-binding protein 1	Q96B97 [247-265]	T(5): 0.0; T(6): 0.2; T(8): 99.7; S(11): 0.0; S(12): 0.0; T(14): 0.0; S(18): 0.0	Q96B97 1xPhospho [T254(99.7)]	1	0.96	0.00438687	0.02	0.987036	0.94	0.023903
EWSLESSPAQNWTPPQPR	Q8N6T3	ARFGAP1	ADP-ribosylation factor GTPase-activating protein 1	Q8N6T3 [123-140]	S(3): 0.0; S(6): 6.1; S(7): 93.9; T(13): 100.0	Q8N6T3 2xPhospho [S129(93.9); T135(100)]	2	0.82	0.0030329	0.09	0.848374	0.73	0.0240074
RISGLIYEETR	P62805	HIST1H4A; HIST1H4F; HIST1H4D; HIST1H4J; HIST2H4A; HIST2H4B; HIST1H4H; HIST1H4C; HIST4H4; HIST1H4E; HIST1H4I; HIST1H4B; HIST1H4K; HIST1H4L	Histone H4	P62805 [46-56]	S(3): 100.0; Y(7): 0.0; T(10): 0.0	P62805 1xPhospho [S48(100)]	2	0.84	0.0023818	0.1	0.73754	0.74	0.0240428
GLHVVEVTYDDVPIPNSPFK	O75369	FLNB	Filamin-B	O75369 [1300-1319]	T(8): 0.0; Y(9): 0.0; S(17): 100.0	O75369 1xPhospho [S1316(100)]	1	1.1	0.000826759	0.42	0.254349	0.68	0.024046
FYCDYCDTYLTHDSPSVR	P09234	SNRPC	U1 small nuclear ribonucleoprotein C	P09234 [4-21]	Y(2): 0.0; Y(5): 0.0; T(8): 0.0; Y(9): 0.0; T(11): 0.0; S(14): 93.2; S(16): 6.8	P09234 1xPhospho [S17(93.2)]	2	1.95	0.000970468	0.8	0.312716	1.15	0.0241547
AGFTALNASKEK	Q9NPG3	UBN1	Ubinuclein-1	Q9NPG3 [223-234]	T(4): 3.0; S(9): 97.0	Q9NPG3 1xPhospho [S231(97)]	1	1.64	0.00132178	0.53	0.44164	1.1	0.0241547
RNSPMAQTPPCHLPNIPGVTSPGTLIEDSK	Q13542	EIF4EBP2	Eukaryotic translation initiation factor 4E-binding protein 2	Q13542 [63-92]	S(3): 15.1; T(8): 89.3; T(20): 66.2; S(21): 21.6; T(24): 7.6; S(29): 0.1	Q13542 2xPhospho [T70(89.3); T/S]	6	1.22	0.00788559	-0.21	0.808735	1.43	0.0241547
FVETSPSGLDPNASVYQPLKK	Q8N5G2	TMEM57	Macoilin	Q8N5G2 [644-664]	T(4): 89.1; S(5): 10.8; S(7): 0.2; S(14): 0.0; Y(16): 0.0	Q8N5G2 1xPhospho [T647(89)]	1	0.71	0.00418462	0.03	0.965065	0.68	0.0241547
MSQPGSPSPK	Q14839	CHD4	Chromodomain-helicase-DNA-binding protein 4	Q14839 [1530-1539]	S(2): 0.9; S(6): 90.6; S(8): 8.5	Q14839 1xPhospho [S1535(90.6)]	1	-0.42	0.0508338	0.26	0.23153	-0.67	0.0241547
GKYGQFSGLNPGGRPITPPR	P62136	PPP1CA	Serine/threonine-protein phosphatase PP1-alpha catalytic subunit	P62136 [304-323]	Y(3): 0.4; S(7): 1.3; T(17): 98.3	P62136 1xPhospho [T320(98.3)]	1	0.75	0.0157199	-0.34	0.551016	1.09	0.0242747
GYALVPIIVNSSTPK	P82094	TMF1	TATA element modulatory factor	P82094 [352-366]	Y(2): 0.0; S(11): 2.8; S(12): 48.6; T(13): 48.6		2	1.53	0.00208313	0.37	0.659554	1.16	0.0245181
LAGASPATVAAAAAAGSGPK	Q13045	FLII	Protein flightless-1 homolog	Q13045 [402-421]	S(5): 50.0; T(8): 50.0; S(17): 0.0		2	0.97	0.00107712	0.31	0.348513	0.66	0.0245181
AGNWPGSPQVSGPSPAAR	O60244	MED14	Mediator of RNA polymerase II transcription subunit 14	O60244 [1106-1123]	S(7): 100.0; S(11): 0.0; S(14): 100.0	O60244 2xPhospho [S1112(100); S1119(100)]	1	0.73	0.00846404	-0.13	0.786595	0.86	0.0245181
PSPLLPESLENDSIEAAEGEQEPEAEALGGTNSEPGTPR	Q7Z6I6	ARHGAP30	Rho GTPase-activating protein 30	Q7Z6I6 [352-390]	S(2): 0.0; S(8): 0.0; S(13): 0.0; T(31): 12.9; S(33): 74.2; T(37): 12.9		7	-1.44	0.000293057	-0.47	0.0508536	-0.97	0.0245181
SQEDEISSPVNK	Q5UIP0	RIF1	Telomere-associated protein RIF1	Q5UIP0 [2189-2200]	S(1): 0.0; S(7): 0.0; S(8): 100.0	Q5UIP0 1xPhospho [S2196(100)]	1	1.32	0.000445701	0.65	0.10342	0.67	0.0249153
LSSDSFAR	Q9HB09	BCL2L12	Bcl-2-like protein 12	Q9HB09 [241-248]	S(2): 99.3; S(3): 0.7; S(5): 0.0	Q9HB09 1xPhospho [S242(99.3)]	1	0.57	0.0409206	1.19	0.0035681	-0.61	0.0249384
SISSPNVNR	Q9NQT8	KIF13B	Kinesin-like protein KIF13B	Q9NQT8 [1379-1387]	S(1): 1.1; S(3): 89.8; S(4): 9.1	Q9NQT8 1xPhospho [S1381(89.8)]	2	-0.12	0.545988	0.47	0.039049	-0.59	0.0249384
FLPSPVVIK	Q13618	CUL3	Cullin-3	Q13618 [734-742]	S(4): 100.0	Q13618 1xPhospho [S737(100)]	1	-0.41	0.0295242	-1.42	0.00317607	1	0.0249384
DGSISPVSSECSVVER	Q8NCP5	ZBTB44	Zinc finger and BTB domain-containing protein 44	Q8NCP5 [157-172]	S(3): 10.0; S(5): 79.5; S(8): 10.0; S(9): 0.2; S(12): 0.2	Q8NCP5 1xPhospho [S161(79.5)]	1	1.77	0.000454197	0.98	0.10624	0.79	0.0251288
KSPLAQDSPSQGSPALYR	Q69YH5	CDCA2	Cell division cycle-associated protein 2	Q69YH5 [119-136]	S(2): 100.0; S(8): 0.0; S(10): 0.0; S(13): 0.0; Y(17): 0.0	Q69YH5 1xPhospho [S120(100)]	1	0.89	0.0362562	-0.99	0.315684	1.89	0.0251288
TAQQNGDTPEAQGLDITTYGESNLVAEPQK	Q15003	NCAPH	Condensin complex subunit 2	Q15003 [598-627]	T(1): 0.0; T(8): 100.0; T(17): 0.0; T(18): 0.0; Y(19): 0.0; S(22): 0.0	Q15003 1xPhospho [T605(100)]	1	0.8	0.00363524	0.08	0.896582	0.71	0.0251288
RTSFDDRLEDDDFDLIEENLGVK	Q7KZ85	SUPT6H	Transcription elongation factor SPT6	Q7KZ85 [89-111]	T(2): 12.3; S(3): 87.7	Q7KZ85 1xPhospho [S91(87.7)]	2	0.74	0.00324726	0.08	0.852354	0.67	0.0251288
LYINHTPPPLSK	Q8NI27	THOC2	THO complex subunit 2	Q8NI27 [1438-1449]	Y(2): 0.6; T(6): 99.4; S(11): 0.0	Q8NI27 1xPhospho [T1443(99.4)]	2	0.68	0.0138684	-0.23	0.617218	0.91	0.0251288
RKQSSSEISLAVER	P48634	PRRC2A	Protein PRRC2A	P48634 [453-466]	S(4): 98.2; S(5): 1.5; S(6): 0.2; S(9): 0.0	P48634 1xPhospho [S456(98.2)]	1	0.59	0.01597	-0.22	0.562934	0.82	0.0251288
STEPSVTPDLLNFK	Q6WCQ1	MPRIP	Myosin phosphatase Rho-interacting protein	Q6WCQ1 [377-390]	S(1): 49.9; T(2): 49.9; S(5): 0.2; T(7): 0.0		3	0.58	0.0230043	-0.33	0.441913	0.91	0.0251288
DGDKSPMSSLQISNEK	Q9UER7	DAXX	Death domain-associated protein 6	Q9UER7 [491-506]	S(5): 100.0; S(8): 0.0; S(9): 0.0; S(13): 0.0	Q9UER7 1xPhospho [S495(99.9)]	4	-0.26	0.198076	0.33	0.0918991	-0.58	0.0251288
EEPLSEEEPCTSTAIASPEK	Q9Y2X3	NOP58	Nucleolar protein 58	Q9Y2X3 [498-517]	S(5): 100.0; T(11): 0.0; S(12): 0.0; T(13): 0.0; S(17): 0.0	Q9Y2X3 1xPhospho [S514(100)]	2	-1.63	0.000602276	-0.4	0.1556	-1.22	0.0251413
RSPSPSPTPEAK	Q8TAQ2	SMARCC2	SWI/SNF complex subunit SMARCC2	Q8TAQ2 [301-312]	S(2): 100.0; S(4): 0.0; S(6): 0.0; T(8): 0.0	Q8TAQ2 1xPhospho [S302(100)]	2	0.08	0.818482	0.92	0.0169861	-0.84	0.025166
LLPSAPQTLPDGPLASPAR	O15027	SEC16A	Protein transport protein Sec16A	O15027 [1771-1789]	S(4): 0.0; T(8): 0.0; S(16): 100.0	O15027 1xPhospho [S1786(100)]	1	1	0.00358072	0.09	0.8835	0.91	0.0254029
QRQSGVVVEEPPPSK	Q9NYV4	CDK12	Cyclin-dependent kinase 12	Q9NYV4 [1050-1064]	S(4): 100.0; S(14): 0.0	Q9NYV4 1xPhospho [S1053(100)]	1	1.5	0.00299132	0.23	0.80456	1.27	0.0254165
RLEEPEEPKVLTPEEQLADK	O75822	EIF3J	Eukaryotic translation initiation factor 3 subunit J	O75822 [98-117]	T(12): 100.0	O75822 1xPhospho [T109(100)]	2	1.33	0.00236585	0.3	0.691408	1.04	0.0257444
GATVLPANTPGNVGSGK	P22059	OSBP	Oxysterol-binding protein 1	P22059 [324-340]	T(3): 87.5; T(9): 12.5; S(15): 0.0	P22059 1xPhospho [T326(87.5)]	1	1.14	0.00076667	0.48	0.210462	0.67	0.0257444
RSTQGVTLTDLQEAEK	O14974	PPP1R12A	Protein phosphatase 1 regulatory subunit 12A	O14974 [694-709]	S(2): 50.0; T(3): 50.0; T(7): 0.0; T(9): 0.0		3	0.05	0.905421	1.09	0.0192285	-1.03	0.0257444
MAPVPLDDSNRPASLTK	Q9NYF8	BCLAF1	Bcl-2-associated transcription factor 1	Q9NYF8 [551-567]	S(9): 0.0; S(14): 99.4; T(16): 0.6	Q9NYF8 1xPhospho [S564(99.4)]	1	0.91	0.00353861	0.07	0.869951	0.84	0.0257696
GGPSPGDVEAIK	P09661	SNRPA1	U2 small nuclear ribonucleoprotein A'	P09661 [194-205]	S(4): 100.0	P09661 1xPhospho [S197(100)]	2	0.71	0.00383845	0.07	0.903419	0.64	0.0258632
GASFLFPPAESLSPEEPRSPGGWR	P27987	ITPKB	Inositol-trisphosphate 3-kinase B	P27987 [53-76]	S(3): 0.0; S(11): 0.8; S(13): 99.2; S(19): 100.0	P27987 2xPhospho [S65(99.2); S71(100)]	1	1.67	0.00155586	0.66	0.479402	1.01	0.0260181
TISQEFLTPGK	Q0ZGT2	NEXN	Nexilin	Q0ZGT2 [363-373]	T(1): 50.0; S(3): 50.0; T(8): 0.0	Q0ZGT2 1xPhospho [T363(94.8)]	6	-0.22	0.397552	0.52	0.0540979	-0.74	0.0261396
YGGPYHIGGSPFK	P21333	FLNA	Filamin-A	P21333 [2501-2513]	Y(1): 0.0; Y(5): 0.0; S(10): 100.0	P21333 1xPhospho [S2510(100)]	1	1.32	0.000965974	0.55	0.276134	0.77	0.0269333
ADLNQGIGEPQSPSRR	Q96C19	EFHD2	EF-hand domain-containing protein D2	Q96C19 [63-78]	S(12): 7.0; S(14): 93.0	Q96C19 1xPhospho [S76(93)]	3	1.34	0.000335771	0.75	0.0561589	0.6	0.0271313
FALKVDSPDVKR	Q7Z4V5	HDGFRP2	Hepatoma-derived growth factor-related protein 2	Q7Z4V5 [484-495]	S(7): 100.0	Q7Z4V5 1xPhospho [S490(100)]	1	1.07	0.00290957	0.17	0.764143	0.9	0.0271313
YETSLLDLVQSLSPNSAPKPQR	Q86T90	KIAA1328	Uncharacterized protein KIAA1328	Q86T90 [509-530]	Y(1): 47.1; T(3): 5.9; S(4): 47.1; S(11): 0.0; S(13): 88.9; S(16): 11.1	Q86T90 2xPhospho [S521(88.9); Y/S/T]	1	-0.34	0.273812	0.57	0.0762377	-0.91	0.0272418
VASSPVMVSNPATR	P51610	HCFC1	Host cell factor 1	P51610 [595-608]	S(3): 50.0; S(4): 50.0; S(9): 0.0; T(13): 0.0	P51610 1xPhospho [S598(88.8)]	4	1.04	0.00110427	0.37	0.318936	0.67	0.0273712
KPGILGDSPLGALQPGAQPANPLLGELPAGGGLPPELPPRR	Q8IY67	RAVER1	Ribonucleoprotein PTB-binding 1	Q8IY67 [392-432]	S(8): 100.0	Q8IY67 1xPhospho [S399(100)]	1	1.06	0.00150873	0.3	0.444649	0.76	0.0276665
QSSTPGSLFLSPPAPAPK	Q9H4A3	WNK1	Serine/threonine-protein kinase WNK1	Q9H4A3 [9-26]	S(2): 0.0; S(3): 0.0; T(4): 0.0; S(7): 0.0; S(11): 100.0	Q9H4A3 1xPhospho [S19(100)]	2	1.17	0.000405262	0.6	0.0763713	0.57	0.0277644
PVPDSPVSVTR	Q9BXS9	SLC26A6	Solute carrier family 26 member 6	Q9BXS9 [748-758]	S(5): 100.0; S(8): 0.0; T(10): 0.0	Q9BXS9 1xPhospho [S752(100)]	1	-1.53	0.000190508	-0.56	0.0206503	-0.97	0.027865
QKTVDIDDAQILPR	Q6GYQ0	RALGAPA1	Ral GTPase-activating protein subunit alpha-1	Q6GYQ0 [752-765]	T(3): 100.0	Q6GYQ0 1xPhospho [T754(100)]	1	0.1	0.685686	-1.07	0.0351115	1.17	0.027985
AGIPQHHPPMAQNLQYPDDSDDEKK	Q15223	PVRL1	Nectin-1	Q15223 [403-427]	Y(16): 0.0; S(20): 100.0	Q15223 1xPhospho [S422(100)]	1	-0.63	0.0415185	0.08	0.318057	-0.72	0.0280217
GGGTALAIVTSGELDSSVTEVLGSPR	Q02446	SP4	Transcription factor Sp4	Q02446 [734-759]	T(4): 0.0; T(10): 0.4; S(11): 98.7; S(16): 0.4; S(17): 0.4; T(19): 0.1; S(24): 0.0	Q02446 1xPhospho [S749(76.5)]	2	1.65	0.00197653	0.46	0.565009	1.18	0.0284329
PMSSEELPLASSWR	Q9H6S0	YTHDC2	Probable ATP-dependent RNA helicase YTHDC2	Q9H6S0 [1181-1194]	S(3): 7.9; S(4): 92.1; S(11): 0.0; S(12): 0.0	Q9H6S0 1xPhospho [S1184(92.1)]	1	1.53	0.000644906	0.74	0.14939	0.79	0.0284329
HSIAGIIRSPK	P16591	FER	Tyrosine-protein kinase Fer	P16591 [426-436]	S(2): 0.0; S(9): 100.0	P16591 1xPhospho [S434(100)]	1	1.37	0.00176726	0.42	0.511627	0.95	0.0284329
ELGPLPDDDDMASPKLK	Q86U86	PBRM1	Protein polybromo-1	Q86U86 [624-640]	S(13): 100.0	Q86U86 1xPhospho [S636(100)]	1	1.32	0.00122804	0.47	0.348522	0.85	0.0284329
GLEFPMTDLDMLSPIHTPQR	O60784	TOM1	Target of Myb protein 1	O60784 [148-167]	T(7): 0.0; S(13): 99.8; T(17): 0.2	O60784 1xPhospho [S160(99.8)]	1	1	0.000943695	0.4	0.25294	0.59	0.0284329
QDSRGSPLLGPVVPGPSPIPSVTEK	P49454	CENPF	Centromere protein F	P49454 [2991-3015]	S(3): 84.3; S(6): 15.7; S(17): 100.0; S(21): 0.0; T(23): 0.0	P49454 2xPhospho [S2993(84.3); S3007(100)]	1	0.51	0.107542	-0.95	0.162658	1.47	0.0284329
MADLDSPPKLSGVQQPSEGVGGGR	Q9H9E3	COG4	Conserved oligomeric Golgi complex subunit 4	Q9H9E3 [1-24]	S(6): 99.9; S(11): 0.1; S(17): 0.0	Q9H9E3 1xPhospho [S6(99.9)]	1	0.47	0.0753782	1.07	0.00500778	-0.6	0.0284329
TAAELLQSQGSQAGGSQTLKR	Q14141	SEPT6	Septin-6	Q14141 [401-421]	T(1): 0.0; S(8): 0.5; S(11): 0.1; S(16): 98.9; T(18): 0.5	Q14141 1xPhospho [T418(100)]	5	0.29	0.30265	0.99	0.00882279	-0.71	0.0284329
ESEDKPEIEDVGSDEEEEK	P07900	HSP90AA1	Heat shock protein HSP 90-alpha	P07900 [251-269]	S(2): 0.0; S(13): 100.0	P07900 1xPhospho [S263(100)]	1	-0.09	0.746959	0.67	0.0331439	-0.76	0.0284329
EMFPYEASTPTGISASCRRPIK	P42167	TMPO	Lamina-associated polypeptide 2, isoforms beta/gamma	P42167 [347-368]	Y(5): 0.0; S(8): 0.0; T(9): 0.0; T(11): 0.0; S(14): 9.7; S(16): 90.3	P42167 1xPhospho [S362(90.3)]	1	1.53	0.0020888	0.39	0.58538	1.15	0.028558
KGLPLGSAVSSPVLFSPVGR	Q8WUM0	NUP133	Nuclear pore complex protein Nup133	Q8WUM0 [35-54]	S(7): 0.0; S(10): 9.8; S(11): 90.2; S(16): 100.0	Q8WUM0 2xPhospho [S45(89.6); S50(100)]	3	1.21	0.00197037	0.32	0.555371	0.9	0.0287228
PVPDSPVSVTRL	Q9BXS9	SLC26A6	Solute carrier family 26 member 6	Q9BXS9 [748-759]	S(5): 100.0; S(8): 100.0; T(10): 0.0	Q9BXS9 2xPhospho [S752(100); S755(99.2)]	2	-1.05	0.0015963	-0.16	0.44926	-0.9	0.0287228
TMCPLLSMKPGEYSYFSPR	Q15003	NCAPH	Condensin complex subunit 2	Q15003 [416-434]	T(1): 0.0; S(7): 0.0; Y(13): 0.1; S(14): 0.1; Y(15): 0.1; S(17): 99.7	Q15003 1xPhospho [S432(99.7)]	1	1.16	0.00854891	-0.14	0.861364	1.3	0.0287299
YNVSTTPYLQSVK	Q8WWK9	CKAP2	Cytoskeleton-associated protein 2	Q8WWK9 [592-604]	Y(1): 0.0; S(4): 0.3; T(5): 48.2; T(6): 48.2; Y(8): 3.4; S(11): 0.0		3	0.6	0.0537374	-0.66	0.272637	1.26	0.0287423
RLNQSAENGSSLPSAASSCAEAR	Q8NB90	SPATA5	Spermatogenesis-associated protein 5	Q8NB90 [9-31]	S(5): 100.0; S(10): 0.0; S(11): 0.0; S(14): 0.0; S(17): 0.0; S(18): 0.0	Q8NB90 1xPhospho [S13(100)]	1	2.01	0.0019427	0.67	0.542704	1.34	0.0289253
EEAAEVASLDVANIISGSGRPR	Q9BW71	HIRIP3	HIRA-interacting protein 3	Q9BW71 [485-506]	S(8): 100.0; S(16): 0.0; S(18): 0.0	Q9BW71 1xPhospho [S492(100)]	3	1.16	0.00303259	0.2	0.750701	0.96	0.0289253
RNTAPSPGPSVIR	Q9H7P9	PLEKHG2	Pleckstrin homology domain-containing family G member 2	Q9H7P9 [464-476]	T(3): 100.0; S(6): 0.0; S(10): 0.0	Q9H7P9 1xPhospho [T466(100)]	1	1.98	0.000500163	1.13	0.10387	0.85	0.0290472
AHTLLSPPSANNATFAR	P49005	POLD2	DNA polymerase delta subunit 2	P49005 [10-26]	T(3): 0.1; S(6): 99.8; S(9): 0.1; T(14): 0.0	P49005 1xPhospho [S15(99.8)]	1	1.37	0.00170437	0.45	0.475079	0.92	0.0291579
RLSLPSSK	Q8NCD3	HJURP	Holliday junction recognition protein	Q8NCD3 [484-491]	S(3): 100.0; S(6): 0.0; S(7): 0.0	Q8NCD3 1xPhospho [S486(100)]	3	1.18	0.000732676	0.52	0.174047	0.66	0.0291579
SAASREDLVGPEVGASPQSGR	Q86X27	RALGPS2	Ras-specific guanine nucleotide-releasing factor RalGPS2	Q86X27 [293-313]	S(1): 1.6; S(4): 98.4; S(16): 50.0; S(19): 50.0	Q86X27 2xPhospho [S296(98.4); S]	2	-1.32	0.000272661	-0.5	0.0379475	-0.82	0.0291579
TFAPLPEFEQEEDDGEVTEDSDEDFIQPR	Q9UPN9	TRIM33	E3 ubiquitin-protein ligase TRIM33	Q9UPN9 [1085-1113]	T(1): 0.0; T(18): 1.0; S(21): 99.0	Q9UPN9 1xPhospho [S1105(99)]	1	1.39	0.00185238	0.41	0.513875	0.98	0.0292946
NLADEIESYMNLKSPLGSK	Q5VZ89	DENND4C	DENN domain-containing protein 4C	Q5VZ89 [995-1013]	S(8): 0.0; Y(9): 0.0; S(14): 100.0; S(18): 0.0	Q5VZ89 1xPhospho [S1008(100)]	1	1.31	0.000286316	0.71	0.0400896	0.6	0.0293304
SCSPLAFSAFGDLTIK	Q96EY5	FAM125A; MVB12A	Multivesicular body subunit 12A	Q96EY5 [230-245]	S(1): 50.0; S(3): 50.0; S(8): 0.0; T(14): 0.0		3	0.87	0.00121481	0.33	0.325946	0.55	0.0293304
MVITAPPVTNQPVTPK	Q7Z7C8	TAF8	Transcription initiation factor TFIID subunit 8	Q7Z7C8 [117-132]	T(4): 0.0; T(9): 0.0; T(14): 100.0	Q7Z7C8 1xPhospho [T130(100)]	1	0.81	0.00693973	-0.01	0.952399	0.82	0.0293304
SVPFIHVPSPAVPK	O75427	LRCH4	Leucine-rich repeat and calponin homology domain-containing protein 4	O75427 [581-594]	S(1): 0.0; S(9): 100.0	O75427 1xPhospho [S589(100)]	1	0.49	0.0874338	-0.79	0.193195	1.28	0.0293304
QTPSRQPPLPHR	Q07666	KHDRBS1	KH domain-containing, RNA-binding, signal transduction-associated protein 1	Q07666 [32-43]	T(2): 0.1; S(4): 100.0		3	1.64	0.00161201	0.57	0.440632	1.06	0.0294
QAPAPTVIRDPPSITPAVKSPLPGPSEEK	Q13112	CHAF1B	Chromatin assembly factor 1 subunit B	Q13112 [439-467]	T(6): 0.0; S(13): 0.3; T(15): 0.3; S(20): 99.4; S(26): 0.0	Q13112 1xPhospho [S458(99.4)]	1	1.1	0.000657664	0.5	0.14701	0.6	0.0294782
YDIPATAATATSPTPNPVPSVPANPPK	P51610	HCFC1	Host cell factor 1	P51610 [400-426]	Y(1): 0.0; T(6): 0.0; T(9): 0.1; T(11): 2.4; S(12): 13.8; T(14): 83.7; S(20): 0.0		5	-0.78	0.0023818	-0.1	0.625737	-0.68	0.0294782
GGGQLDLLGVSLASLKK	Q8WVB6	CHTF18	Chromosome transmission fidelity protein 18 homolog	Q8WVB6 [212-228]	S(11): 0.0; S(14): 100.0	Q8WVB6 1xPhospho [S225(100)]	1	1.24	0.000270124	0.72	0.0362091	0.52	0.0295746
ISLSPFSTTDSAYEWK	Q9UPY3	DICER1	Endoribonuclease Dicer	Q9UPY3 [1467-1482]	S(2): 5.5; S(4): 83.2; S(7): 5.5; T(8): 5.5; T(9): 0.4; S(11): 0.0; Y(13): 0.0	Q9UPY3 1xPhospho [S1470(83.2)]	2	0.82	0.00393084	0.07	0.850252	0.74	0.0295746
RAQSLKAPSIATIK	Q6R327	RICTOR	Rapamycin-insensitive companion of mTOR	Q6R327 [1299-1312]	S(4): 100.0; S(9): 0.0; T(12): 0.0	Q6R327 1xPhospho [S1302(100)]	3	0.78	0.00689206	-0.03	0.962548	0.8	0.0295746
SESLSNCSIGK	Q92625	ANKS1A	Ankyrin repeat and SAM domain-containing protein 1A	Q92625 [645-655]	S(1): 93.5; S(3): 6.1; S(5): 0.5; S(8): 0.0	Q92625 1xPhospho [S645(93.4)]	1	0.03	0.95299	0.73	0.0234811	-0.69	0.0295746
HFEASCGQLSPAR	Q96N21	ENTHD2	AP-4 complex accessory subunit tepsin	Q96N21 [347-359]	S(5): 0.0; S(10): 100.0	Q96N21 1xPhospho [S356(100)]	1	0.55	0.0430457	1.15	0.00393924	-0.59	0.0297194
AVGPASILKEVEDKESEGEEEDEDEDLSK	O95218	ZRANB2	Zinc finger Ran-binding domain-containing protein 2	O95218 [138-166]	S(6): 100.0; S(16): 100.0; S(28): 0.0	O95218 2xPhospho [S143(100); S153(100)]	1	0.65	0.00552697	0.01	0.964785	0.64	0.030131
EVESRLSPGESAYQK	Q6NYC8	PPP1R18	Phostensin	Q6NYC8 [218-232]	S(4): 0.9; S(7): 99.1; S(11): 0.0; Y(13): 0.0	Q6NYC8 1xPhospho [S224(99.1)]	1	1.52	0.000644811	0.69	0.138259	0.83	0.0301828
SHSITNMEIGGLK	Q96RT1	ERBB2IP	Protein LAP2	Q96RT1 [870-882]	S(1): 48.4; S(3): 48.4; T(5): 3.1		2	-0.01	0.974385	0.57	0.0258444	-0.57	0.0304823
RLSAPLPSSCGDPEK	Q96EP0	RNF31	E3 ubiquitin-protein ligase RNF31	Q96EP0 [464-478]	S(3): 100.0; S(8): 0.0; S(9): 0.0	Q96EP0 1xPhospho [S466(100)]	1	0.71	0.00692233	-0.03	0.970806	0.73	0.0306869
SMGTGDTPGLEVPSSPLRK	Q86WB0	ZC3HC1	Nuclear-interacting partner of ALK	Q86WB0 [381-399]	S(1): 46.9; T(4): 46.9; T(7): 6.1; S(14): 50.0; S(15): 50.0		4	1.44	0.00112449	0.58	0.283068	0.86	0.031033
SLLFGAMSEMISPSEK	Q7Z2Z1	TICRR	Treslin	Q7Z2Z1 [1067-1082]	S(1): 0.0; S(8): 0.0; S(12): 100.0; S(14): 0.0	Q7Z2Z1 1xPhospho [S1078(99.2)]	3	0.5	0.0342569	-0.23	0.409379	0.73	0.0310968
RCSAGLGALAQRPGSVSK	Q9NXV2	KCTD5	BTB/POZ domain-containing protein KCTD5	Q9NXV2 [27-44]	S(3): 100.0; S(15): 0.0; S(17): 0.0	Q9NXV2 1xPhospho [S29(100)]	1	0.39	0.105014	-0.55	0.180855	0.94	0.0312525
AGGPTTPLSPTR	P20700	LMNB1	Lamin-B1	P20700 [15-26]	T(5): 0.0; T(6): 0.0; S(9): 100.0; T(11): 0.0	P20700 1xPhospho [S23(100)]	4	1.15	0.00973626	-0.18	0.861716	1.33	0.031814
NVALLSQLYHSPARR	Q15717	ELAVL1	ELAV-like protein 1	Q15717 [192-206]	S(6): 0.0; Y(9): 0.1; S(11): 99.9	Q15717 1xPhospho [S202(99.9)]	2	0.28	0.185328	0.83	0.00751703	-0.55	0.0318895
PAGPAGDEPAESPSETPGPSPAGPTR	Q9NZT2	OGFR	Opioid growth factor receptor	Q9NZT2 [566-591]; [626-651]	S(12): 0.0; S(14): 0.0; T(16): 0.0; S(20): 100.0; T(25): 0.0		3	-1.09	0.00171801	-0.21	0.438979	-0.88	0.0324967
LFESSENIEDSNNPK	P34910	EVI2B	Protein EVI2B	P34910 [291-305]	S(4): 95.2; S(5): 4.8; S(11): 0.0	P34910 1xPhospho [S294(95.2)]	4	0.12	0.726347	0.91	0.0186768	-0.79	0.032631
LQTLSPALKAPEK	Q13415	ORC1	Origin recognition complex subunit 1	Q13415 [283-295]	T(3): 0.6; S(5): 99.4	Q13415 1xPhospho [S287(99.4)]	1	1.75	0.000245753	1.09	0.0277375	0.65	0.0327543
EMPSVFQNVLGSAVLSPAHK	O75362	ZNF217	Zinc finger protein 217	O75362 [578-597]	S(4): 0.0; S(12): 0.0; S(16): 100.0	O75362 1xPhospho [S593(100)]	1	0.84	0.00379524	0.1	0.793229	0.74	0.0327554
RQSSGSATNVASTPDNR	Q7Z460	CLASP1	CLIP-associating protein 1	Q7Z460 [644-660]	S(3): 1.0; S(4): 1.0; S(6): 98.0; T(8): 0.0; S(12): 0.0; T(13): 0.0	Q7Z460 1xPhospho [S646(98.9)]	2	0.83	0.00704757	0	0.986344	0.83	0.0327554
AQNLPQSPENTDLQVIPGSQTR	Q8NE01	CNNM3	Metal transporter CNNM3	Q8NE01 [655-676]	S(7): 99.8; T(11): 0.2; S(19): 0.0; T(21): 0.0	Q8NE01 1xPhospho [S661(99.8)]	1	0.74	0.0134186	-0.14	0.756021	0.89	0.0327554
NKPLSPIKLTPTSVLDYFGTGSVQR	P35251	RFC1	Replication factor C subunit 1	P35251 [152-176]	S(5): 97.3; T(10): 87.2; T(12): 8.9; S(13): 3.9; Y(17): 7.2; T(20): 47.8; S(22): 47.8	P35251 3xPhospho [S156(97.3); T161(87.2); T/S/Y]	1	1.74	0.000866702	0.82	0.195678	0.92	0.0328044
TRSLDFPQNEPQIK	Q8NEF9	SRFBP1	Serum response factor-binding protein 1	Q8NEF9 [365-378]	T(1): 0.5; S(3): 99.5	Q8NEF9 1xPhospho [S367(93.1)]	2	1.01	0.0016358	0.31	0.407425	0.71	0.0328044
QNSPAGNKENIKPNETSPSFSK	Q99700	ATXN2	Ataxin-2	Q99700 [756-777]	S(3): 99.8; T(16): 0.1; S(17): 0.1; S(19): 0.0; S(21): 0.0	Q99700 1xPhospho [S758(99.8)]	1	0.32	0.133144	0.86	0.00656717	-0.54	0.0332505
KVSYSHIQSK	P27816	MAP4	Microtubule-associated protein 4	P27816 [998-1007]	S(3): 93.2; Y(4): 6.3; S(5): 0.5; S(9): 0.0	P27816 1xPhospho [S1000(93.2)]	1	2.28	0.00814128	-0.24	0.940456	2.52	0.0334946
FRISLGLPVGAVINCADNTGAK	P62829	RPL23	60S ribosomal protein L23	P62829 [14-35]	S(4): 100.0; T(19): 0.0	P62829 1xPhospho [S17(100)]	1	1.78	0.0108219	-0.41	0.84578	2.2	0.0334946
LFPDTPLALDANKK	Q12906	ILF3	Interleukin enhancer-binding factor 3	Q12906 [588-601]	T(5): 100.0	Q12906 1xPhospho [T592(100)]	2	-0.16	0.400336	-1.06	0.0117106	0.91	0.0334946
SSGSNQPFPIKPLSESKNR	Q5W0Z9	ZDHHC20	Probable palmitoyltransferase ZDHHC20	Q5W0Z9 [315-333]	S(1): 0.0; S(2): 0.0; S(4): 0.0; S(14): 9.9; S(16): 90.2	Q5W0Z9 1xPhospho [S330(90.2)]	1	-1.66	0.000242411	-0.77	0.026594	-0.89	0.0334946
NCSVTGIDDLEQIPADTTDINHLETQPVSSK	Q8NG31	CASC5	Protein CASC5	Q8NG31 [1688-1718]	S(3): 87.2; T(5): 12.8; T(17): 0.0; T(18): 0.0; T(25): 0.0; S(29): 0.0; S(30): 0.0	Q8NG31 1xPhospho [S1690(87.2)]	2	0.97	0.0151581	-0.3	0.722889	1.27	0.0335634
LFGPVKSSQDVSLDSNSNSK	Q96Q89	KIF20B	Kinesin-like protein KIF20B	Q96Q89 [492-511]	S(7): 49.7; S(8): 49.7; S(12): 0.7; S(15): 0.0; S(17): 0.0; S(19): 0.0		2	0.66	0.0166482	-0.18	0.691145	0.85	0.0340242
RSLSEQPVMDTATATEQAK	P18615	NELFE; RDBP	Negative elongation factor E	P18615 [48-66]	S(2): 1.6; S(4): 98.2; T(11): 0.2; T(13): 0.0; T(15): 0.0	P18615 1xPhospho [S51(98.2)]	1	1.98	0.000415475	1.21	0.0665241	0.77	0.034127
SGSELPSILPEIWPK	Q96FF9	CDCA5	Sororin	Q96FF9 [33-47]	S(1): 5.1; S(3): 94.9; S(7): 0.0		8	0.43	0.0655842	-0.42	0.277926	0.84	0.034127
GVEPSPSPIKPGDIKR	Q92890	UFD1L	Ubiquitin fusion degradation protein 1 homolog	Q92890 [241-256]	S(5): 1.4; S(7): 98.6	Q92890 1xPhospho [S247(98.6)]	1	0.49	0.0447216	-0.36	0.369032	0.85	0.0343615
LSRQSATEIPLPMLPLADTEK	Q8WYJ6	SEPT1	Septin-1	Q8WYJ6 [311-331]	S(2): 8.3; S(5): 91.7; T(7): 0.0; T(19): 0.0	Q8WYJ6 1xPhospho [S315(91.7)]	14	1.97	0.000137313	1.4	0.0100551	0.57	0.0343828
SREEDPTLTEEEISAMYSSVNKPGQLVNK	Q9NWQ8	PAG1	Phosphoprotein associated with glycosphingolipid-enriched microdomains 1	Q9NWQ8 [301-329]	S(1): 0.0; T(7): 0.0; T(9): 0.0; S(14): 2.2; Y(17): 44.1; S(18): 44.1; S(19): 9.6		1	-0.62	0.00837054	0.02	0.941414	-0.65	0.0343828
RPGQSFHVNSEVNSVLSPR	Q14671	PUM1	Pumilio homolog 1	Q14671 [193-211]	S(5): 0.0; S(10): 0.0; S(14): 0.1; S(17): 100.0	Q14671 1xPhospho [S209(100)]	3	1.57	0.00082244	0.76	0.17381	0.81	0.0344862
TTSISPALAR	Q9UKE5	TNIK	TRAF2 and NCK-interacting protein kinase	Q9UKE5 [676-685]	T(1): 0.0; T(2): 0.0; S(3): 0.1; S(5): 99.9	Q9UKE5 1xPhospho [S680(99.9)]	1	-0.7	0.0977843	0.45	0.209764	-1.15	0.0346985
DAQIRDSWLDNIDWVK	O95400	CD2BP2	CD2 antigen cytoplasmic tail-binding protein 2	O95400 [112-127]	S(7): 100.0	O95400 1xPhospho [S118(100)]	1	1.45	0.000356697	0.81	0.0485982	0.64	0.0348194
LRSSVPGVR	P08670	VIM	Vimentin	P08670 [70-78]	S(3): 99.9; S(4): 0.1	P08670 1xPhospho [S72(99.9)]	1	0.73	0.0110507	-0.13	0.855662	0.86	0.0348795
LKSMDLSEYIIR	Q9H0A0	NAT10	N-acetyltransferase 10	Q9H0A0 [955-966]	S(3): 99.7; S(7): 0.3; Y(9): 0.0	Q9H0A0 1xPhospho [S957(99.7)]	1	1.52	0.00474222	0.22	0.853492	1.3	0.0349103
SVPVTPARPPPHNK	Q99618	CDCA3	Cell division cycle-associated protein 3	Q99618 [6-19]	S(1): 0.0; T(5): 100.0	Q99618 1xPhospho [T10(99)]	3	0.83	0.0205564	-0.3	0.625403	1.13	0.0349103
RQTFIDNTDSIVK	Q13576	IQGAP2	Ras GTPase-activating-like protein IQGAP2	Q13576 [714-726]	T(3): 100.0; T(8): 0.0; S(10): 0.0	Q13576 1xPhospho [T716(100)]	1	0.52	0.118246	1.23	0.00656717	-0.71	0.0349103
QFSPTMSPTLSSITQGVPLDTSK	Q53ET0	CRTC2	CREB-regulated transcription coactivator 2	Q53ET0 [454-476]	S(3): 22.8; T(5): 86.4; S(7): 86.4; T(9): 4.2; S(11): 0.2; S(12): 0.2; T(14): 0.0; T(21): 0.0; S(22): 0.0	Q53ET0 2xPhospho [T458(86.4); S460(86.4)]	1	1.06	0.00170872	0.36	0.405245	0.69	0.0349571
LDDQESPVYAAQQR	Q96ST3	SIN3A	Paired amphipathic helix protein Sin3a	Q96ST3 [5-18]	S(6): 100.0; Y(9): 0.0	Q96ST3 1xPhospho [S10(100)]	1	1.12	0.000464044	0.58	0.0775195	0.53	0.0349826
GSYGDLGGPIITTQVTIPK	P61978	HNRNPK	Heterogeneous nuclear ribonucleoprotein K	P61978 [378-396]	S(2): 11.0; Y(3): 89.0; T(12): 0.0; T(13): 0.0; T(16): 0.0		8	1.05	0.000926861	0.46	0.197521	0.59	0.0349845
LYESLLVGSLPDMNK	P13807	GYS1	Glycogen [starch] synthase, muscle	P13807 [404-418]	Y(2): 0.0; S(4): 0.0; S(9): 100.0	P13807 1xPhospho [S412(100)]	1	-0.12	0.636934	0.51	0.0476752	-0.63	0.035112
KVDSSVLGSLSSVPLTGFSFSPGNSSLFGK	Q9UKX7	NUP50	Nuclear pore complex protein Nup50	Q9UKX7 [276-305]	S(4): 0.0; S(5): 0.0; S(9): 0.0; S(11): 0.0; S(12): 0.0; T(16): 0.0; S(19): 0.0; S(21): 1.0; S(25): 9.5; S(26): 89.5	Q9UKX7 1xPhospho [S301(89.5)]	5	1.07	0.000996816	0.46	0.214332	0.62	0.0353147
PLSPGALQLAGEK	Q8TEK3	DOT1L	Histone-lysine N-methyltransferase, H3 lysine-79 specific	Q8TEK3 [832-844]	S(3): 100.0	Q8TEK3 1xPhospho [S834(100)]	1	-0.87	0.00286951	-0.14	0.629985	-0.73	0.0353147
RVNSGDTEVGSSLLR	O75592	MYCBP2	E3 ubiquitin-protein ligase MYCBP2	O75592 [3464-3478]	S(4): 100.0; T(7): 0.0; S(11): 0.0; S(12): 0.0	O75592 1xPhospho [S3467(100)]	2	1.06	0.00575826	0.07	0.91586	0.98	0.0355291
GAMPPAPVPAGTPAPPGPATMMPDGTLGLTPPTTER	Q15233	NONO	Non-POU domain-containing octamer-binding protein	Q15233 [399-434]	T(12): 0.0; T(20): 0.0; T(26): 1.8; T(30): 32.7; T(33): 32.7; T(34): 32.7		4	0.6	0.0141836	-0.11	0.773344	0.71	0.0356841
AALPSLTNPPSLSPIR	P42858	HTT	Huntingtin	P42858 [1167-1182]	S(5): 0.0; T(7): 0.0; S(11): 0.7; S(13): 99.3	P42858 1xPhospho [S1179(99.3)]	1	1.22	0.000691555	0.57	0.131617	0.65	0.0361076
YVEQYVGTEGASSSPTEGFLLKPVFLQR	O75182	SIN3B	Paired amphipathic helix protein Sin3b	O75182 [990-1017]	Y(1): 0.0; Y(5): 0.0; T(8): 0.0; S(12): 0.2; S(13): 3.7; S(14): 79.5; T(16): 16.6	O75182 1xPhospho [S1003(79.5)]	2	0.62	0.00880256	-0.07	0.944299	0.69	0.0361914
IPSFFPSPEEPPSPSAPSIAK	Q12802	AKAP13	A-kinase anchor protein 13	Q12802 [2697-2717]	S(3): 0.0; S(7): 0.0; S(13): 9.3; S(15): 90.6; S(18): 0.0	Q12802 1xPhospho [S2711(90.6)]	1	0.31	0.0714793	-0.26	0.277926	0.57	0.0362102
TEFLDLDNSPLSPPSPR	Q8NCF5	NFATC2IP	NFATC2-interacting protein	Q8NCF5 [190-206]	T(1): 0.0; S(9): 0.0; S(12): 0.0; S(15): 100.0	Q8NCF5 1xPhospho [S204(100)]	5	-0.6	0.0473596	0.24	0.373945	-0.84	0.0363019
KTPQGPPEIYSDTQFPSLQSTAK	Q9UKY7	CDV3	Protein CDV3 homolog	Q9UKY7 [181-203]	T(2): 0.0; Y(10): 6.0; S(11): 47.0; T(13): 47.0; S(17): 0.0; S(20): 0.0; T(21): 0.0		2	0.99	0.00211561	0.29	0.484648	0.7	0.036365
SISDVTFGAGVSYIGTPRTPSSAK	P42695	NCAPD3	Condensin-2 complex subunit D3	P42695 [1419-1442]	S(1): 0.0; S(3): 0.0; T(6): 0.0; S(12): 0.0; Y(13): 0.0; T(16): 99.9; T(19): 99.2; S(21): 0.9; S(22): 0.0	P42695 2xPhospho [T1434(99.9); T1437(99.2)]	1	1.75	0.00302029	0.5	0.635518	1.25	0.0367336
SGMKSIDTFFGVK	Q5TBB1	RNASEH2B	Ribonuclease H2 subunit B	Q5TBB1 [292-304]	S(1): 49.6; S(5): 49.6; T(8): 0.8		1	0.41	0.186164	-1	0.140617	1.42	0.0368622
TVMDGGLESDGPNMTENGLEDESRPQR	P51116	FXR2	Fragile X mental retardation syndrome-related protein 2	P51116 [558-584]	T(1): 0.6; S(9): 99.4; T(15): 0.0; S(23): 0.0	P51116 1xPhospho [S566(99.4)]	1	-0.42	0.102643	0.32	0.216678	-0.75	0.0370699
AAAPGTLEPDAAAATPAAPSPASLPLAPGCALR	Q8N5W9	FAM101B	Protein FAM101B	Q8N5W9 [52-84]	T(6): 0.0; T(15): 0.0; S(20): 99.8; S(23): 0.2	Q8N5W9 1xPhospho [S71(99.8)]	1	0.69	0.00650051	0.02	0.941414	0.67	0.0371973
MELSLENVTVEGNACK	Q5UIP0	RIF1	Telomere-associated protein RIF1	Q5UIP0 [1890-1905]	S(4): 100.0; T(9): 0.0	Q5UIP0 1xPhospho [S1893(100)]	1	1.37	0.000457333	0.76	0.0722093	0.61	0.0372787
KQSATNLESEEDSEAPVDSTLNNNR	Q2KHR3	QSER1	Glutamine and serine-rich protein 1	Q2KHR3 [979-1003]	S(3): 0.0; T(5): 0.0; S(9): 100.0; S(13): 0.0; S(19): 0.0; T(20): 0.0	Q2KHR3 1xPhospho [S987(100)]	1	0.24	0.528491	1.06	0.0158877	-0.81	0.0377497
SETAPAETATPAPVEKSPAKK	P16401	HIST1H1B	Histone H1.5	P16401 [2-22]	S(1): 0.1; T(3): 0.3; T(8): 99.3; T(10): 0.3; S(17): 100.0	P16401 2xPhospho [T9(99.3); S18(100)]	1	1.85	0.000236918	1.26	0.0233761	0.6	0.0378837
EAPPPVLLTPK	P48634	PRRC2A	Protein PRRC2A	P48634 [1339-1349]	T(9): 100.0	P48634 1xPhospho [T1347(100)]	1	1.59	0.00186207	0.6	0.411992	0.99	0.0378837
SLNAASAMGPAPLISTPPSRPPQVK	Q01826	SATB1	DNA-binding protein SATB1	Q01826 [451-475]	S(1): 0.0; S(6): 0.0; S(15): 0.3; T(16): 0.3; S(19): 99.4	Q01826 1xPhospho [S469(99.4)]	1	0.68	0.0111858	-0.02	0.886946	0.7	0.0378837
LSRQSATEIPLPMLPLADTEK	Q8WYJ6	SEPT1	Septin-1	Q8WYJ6 [311-331]	S(2): 0.6; S(5): 98.9; T(7): 0.6; T(19): 0.0		21	1.81	0.000105754	1.33	0.00624544	0.49	0.0379629
GLNVIGASDQSPLQSPSNLR	Q9HAU0	PLEKHA5	Pleckstrin homology domain-containing family A member 5	Q9HAU0 [923-942]	S(8): 0.0; S(11): 100.0; S(15): 100.0; S(17): 0.0	Q9HAU0 2xPhospho [S933(100); S937(100)]	2	1.65	0.00217752	0.58	0.473154	1.06	0.0384798
NLQDPVPKESPK	Q02224	CENPE	Centromere-associated protein E	Q02224 [2630-2641]	S(10): 100.0	Q02224 1xPhospho [S2639(100)]	1	0.62	0.0301455	-0.29	0.534008	0.9	0.0384798
AVVMPLQLIQEQAASPNAEIHILK	Q14807	KIF22	Kinesin-like protein KIF22	Q14807 [529-552]	S(15): 100.0	Q14807 1xPhospho [S543(100)]	1	0.29	0.107793	-0.37	0.216642	0.66	0.0384798
EKNTSSETTMEEELGLVGATADDTEAELIR	Q15021	NCAPD2	Condensin complex subunit 1	Q15021 [968-997]	T(4): 0.4; S(5): 2.5; S(6): 92.1; T(8): 2.5; T(9): 2.5; T(20): 0.0; T(24): 0.0	Q15021 1xPhospho [S973(92.1)]	1	0.2	0.263118	-0.48	0.113151	0.68	0.0384798
NKSEDSTKDDIDLDALAAEIEGAGAAK	O60841	EIF5B	Eukaryotic translation initiation factor 5B	O60841 [7-33]	S(3): 1.4; S(6): 49.3; T(7): 49.3		3	0.94	0.0159109	-0.22	0.765315	1.16	0.0385717
VDIPRDSGCFEGSESGRDDAELAGTEEQLQGLSLAGAP	O75995	SASH3	SAM and SH3 domain-containing protein 3	O75995 [343-380]	S(7): 32.1; S(13): 32.1; S(15): 32.1; T(25): 3.7; S(33): 0.0	O75995 1xPhospho [S349(96)]	5	0.66	0.0764833	1.38	0.00602061	-0.73	0.0393009
TSPPCSPANLSR	P49585	PCYT1A	Choline-phosphate cytidylyltransferase A	P49585 [342-353]	T(1): 50.0; S(2): 50.0; S(6): 100.0; S(11): 0.0	P49585 2xPhospho [S347(100); T/S]	2	-0.04	0.888664	0.68	0.0357185	-0.71	0.0393009
RNSPMAQTPPCHLPNIPGVTSPGTLIEDSK	Q13542	EIF4EBP2	Eukaryotic translation initiation factor 4E-binding protein 2	Q13542 [63-92]	S(3): 100.0; T(8): 100.0; T(20): 49.9; S(21): 49.9; T(24): 0.3; S(29): 0.0	Q13542 3xPhospho [S65(100); T70(100); T/S]	1	1.28	0.00738643	0.07	0.963567	1.21	0.0395998
LTEVPVEPVLTVHPESK	Q9H307	PNN	Pinin	Q9H307 [537-553]	T(2): 0.0; T(11): 0.0; S(16): 100.0	Q9H307 1xPhospho [S552(100)]	1	0.65	0.0120749	-0.08	0.879585	0.74	0.0397996
KAPLNIPGTPVLEDFPQNDDEKER	Q15003	NCAPH	Condensin complex subunit 2	Q15003 [41-64]	T(9): 100.0	Q15003 1xPhospho [T49(100)]	1	1.76	0.00428589	0.41	0.753642	1.34	0.0400448
QNLLSVGDYR	O60264	SMARCA5	SWI/SNF-related matrix-associated actin-dependent regulator of chromatin subfamily A member 5	O60264 [133-142]	S(5): 100.0; Y(9): 0.0	O60264 1xPhospho [S137(100)]	1	0.87	0.00757228	0.03	0.967542	0.84	0.0400459
SLGLGPGER	Q8N5C6	SRBD1	S1 RNA-binding domain-containing protein 1	Q8N5C6 [964-972]	S(1): 100.0	Q8N5C6 1xPhospho [S964(100)]	1	1.02	0.00432534	0.18	0.755831	0.84	0.0400921
RKSELFNPVSLDCK	P0CAP2	POLR2M	DNA-directed RNA polymerase II subunit GRINL1A	P0CAP2 [70-83]	S(3): 100.0; S(10): 0.0	P0CAP2 1xPhospho [S72(100)]	1	1.69	0.000278259	1.13	0.0294693	0.56	0.0401755
MDTVDIANNSTLGKPK	Q9H930	SP140L	Nuclear body protein SP140-like protein	Q9H930 [194-209]	T(3): 0.0; S(10): 98.9; T(11): 1.1	Q9H930 1xPhospho [S203(98.9)]	1	1.2	0.000743581	0.59	0.131251	0.6	0.0401957
AQQLLGQRESPGELISK	Q8WXH0	SYNE2	Nesprin-2	Q8WXH0 [864-880]	S(10): 100.0; S(16): 0.0	Q8WXH0 1xPhospho [S873(100)]	1	0.75	0.00716609	0.05	0.943822	0.7	0.0402882
NKSTESLQANVQR	P26373	RPL13	60S ribosomal protein L13	P26373 [104-116]	S(3): 50.0; T(4): 50.0; S(6): 0.0		2	1.65	0.000843475	0.87	0.153777	0.78	0.040477
NWTEDMEGGISSPVK	P08651	NFIC	Nuclear factor 1 C-type	P08651 [312-326]	T(3): 0.0; S(11): 50.0; S(12): 50.0		1	-0.48	0.0635419	0.19	0.337132	-0.67	0.0405164
LCDPDGLSDEEDQKPVR	Q96RY5	CRAMP1L	Protein cramped-like	Q96RY5 [300-316]	S(8): 100.0	Q96RY5 1xPhospho [S307(100)]	1	-0.75	0.0670576	0.04	0.325645	-0.79	0.040823
VNSTANAETQATSAFQTQKPLK	P06400	RB1	Retinoblastoma-associated protein	P06400 [622-643]	S(3): 50.0; T(4): 50.0; T(9): 0.0; T(12): 0.0; S(13): 0.0; T(17): 0.0		2	2.23	0.00163577	1.04	0.333318	1.19	0.0408534
GGPGSGGHGPLR	Q8N1G0	ZNF687	Zinc finger protein 687	Q8N1G0 [1102-1113]	S(5): 100.0	Q8N1G0 1xPhospho [S1106(100)]	1	1.25	0.00064697	0.64	0.103719	0.6	0.0414012
RAPSSAQYLEEK	P57737	CORO7	Coronin-7	P57737 [876-887]	S(4): 0.6; S(5): 99.5; Y(8): 0.0	P57737 1xPhospho [S880(99.4)]	3	1.58	0.00322439	0.44	0.614583	1.13	0.0414046
TEESKADSPPPSYPTQQAEQAPNTCECHVCK	P78312	FAM193A	Protein FAM193A	P78312 [386-416]	T(1): 0.0; S(4): 0.0; S(8): 100.0; S(12): 0.0; Y(13): 0.0; T(15): 0.0; T(24): 0.0	P78312 1xPhospho [S393(100)]	1	-0.31	0.142908	0	0.188907	-0.32	0.0415613
KQNTSRPPSMHVDDFVAAESK	Q69YN4	KIAA1429	Protein virilizer homolog	Q69YN4 [1643-1663]	T(4): 49.4; S(5): 49.4; S(9): 1.1; S(20): 0.0		1	0.53	0.0200191	-0.14	0.71632	0.67	0.0418919
LCGQNLHGQSPHGQGR	O43439	CBFA2T2	Protein CBFA2T2	O43439 [542-557]	S(10): 100.0	O43439 1xPhospho [S551(100)]	1	-1.1	0.00229033	-0.2	0.457597	-0.9	0.0424352
TIVLVPSPLGQQQDMIFEAR	Q96R06	SPAG5	Sperm-associated antigen 5	Q96R06 [129-148]	T(1): 0.0; S(7): 100.0	Q96R06 1xPhospho [S135(100)]	1	1.25	0.00393084	0.29	0.693731	0.96	0.0425501
FALVTPK	P49792	RANBP2	E3 SUMO-protein ligase RanBP2	P49792 [1408-1414]	T(5): 100.0	P49792 1xPhospho [T1412(100)]	1	1.78	0.00165417	0.78	0.325565	1	0.0427637
SSDELDAWTDFRSR	O43524	FOXO3	Forkhead box protein O3	O43524 [299-312]	S(1): 0.0; S(2): 0.0; T(9): 0.2; S(13): 99.8	O43524 1xPhospho [S311(100)]	2	1.01	0.00208193	0.29	0.412152	0.72	0.0428761
HCAPSPDRSPELSSSR	Q96T37	RBM15	Putative RNA-binding protein 15	Q96T37 [666-681]	S(5): 100.0; S(9): 100.0; S(13): 0.0; S(14): 0.0; S(15): 0.0	Q96T37 2xPhospho [S670(100); S674(100)]	1	-0.09	0.675525	0.47	0.0534797	-0.55	0.0429112
RTSLSAEDAEVTK	Q9P2D1	CHD7	Chromodomain-helicase-DNA-binding protein 7	Q9P2D1 [2531-2543]	T(2): 2.8; S(3): 48.6; S(5): 48.6; T(12): 0.0	Q9P2D1 1xPhospho [S2533(99.4)]	4	1.39	0.000549953	0.78	0.0809588	0.61	0.0429485
FPQALTSNTPLKPSNK	Q9Y2U8	LEMD3	Inner nuclear membrane protein Man1	Q9Y2U8 [875-890]	T(6): 0.0; S(7): 0.0; T(9): 100.0; S(14): 0.0	Q9Y2U8 1xPhospho [T883(99.3)]	2	0.95	0.00151794	0.35	0.2951	0.6	0.0429485
SFGTRPLSSGFSPEEAQQQDEEFEK	Q9C0C2	TNKS1BP1	182 kDa tankyrase-1-binding protein	Q9C0C2 [976-1000]	S(1): 1.8; T(4): 1.8; S(8): 83.0; S(9): 11.8; S(12): 1.8	Q9C0C2 1xPhospho [S983(83)]	4	0.46	0.088536	1.06	0.00656717	-0.6	0.0429768
KPASCVLVSPSNLER	Q96JM2	ZNF462	Zinc finger protein 462	Q96JM2 [1243-1257]	S(4): 0.0; S(9): 92.5; S(11): 7.5	Q96JM2 1xPhospho [S1251(92.5)]	1	0.85	0.00370571	0.17	0.661674	0.68	0.0430038
RTTLCGTLDYLPPEMIEGR	O14965	AURKA	Aurora kinase A	O14965 [286-304]	T(2): 8.0; T(3): 92.0; T(7): 0.0; Y(10): 0.0		4	0.32	0.165543	-0.55	0.175993	0.88	0.043026
AADRLPNLSSPSAEGPPGPPSGPAPR	O60784	TOM1	Target of Myb protein 1	O60784 [453-478]	S(9): 33.3; S(10): 33.3; S(12): 33.3; S(21): 0.0		3	0.84	0.00577302	0.13	0.840416	0.7	0.0431254
LPGTPPLFSPPPR	Q9C0K0	BCL11B	B-cell lymphoma/leukemia 11B	Q9C0K0 [310-322]	T(4): 0.0; S(9): 100.0	Q9C0K0 1xPhospho [S318(100)]	1	-0.39	0.070896	-1.52	0.0061059	1.13	0.0432253
VPTDEIEAQTLATADLDLMK	P04920	SLC4A2	Anion exchange protein 2	P04920 [255-274]	T(3): 99.9; T(10): 0.1; T(13): 0.0	P04920 1xPhospho [T257(99.9)]	2	-0.61	0.285119	0.77	0.119021	-1.39	0.0433176
ESSPIPSPTSDRK	Q01082	SPTBN1	Spectrin beta chain, non-erythrocytic 1	Q01082 [2163-2175]	S(2): 49.9; S(3): 49.9; S(7): 0.3; T(9): 0.0; S(10): 0.0		3	1.64	0.000236918	1.08	0.0209689	0.56	0.0437191
KSGSELPSILPEIWPK	Q96FF9	CDCA5	Sororin	Q96FF9 [32-47]	S(2): 86.0; S(4): 7.0; S(8): 7.0	Q96FF9 1xPhospho [S33(86)]	1	0.3	0.22809	-0.75	0.142642	1.05	0.0438724
DGGNPFAEPSELDNPFQDPAVIQHRPSR	O14828	SCAMP3	Secretory carrier-associated membrane protein 3	O14828 [6-33]	S(10): 0.0; S(27): 100.0	O14828 1xPhospho [S32(100)]	1	-0.14	0.706463	0.8	0.0523902	-0.94	0.0438724
QQSESGRLSLGASR	O43318	MAP3K7	Mitogen-activated protein kinase kinase kinase 7	O43318 [359-372]	S(3): 0.1; S(5): 1.8; S(9): 86.3; S(13): 11.9	O43318 1xPhospho [S367(87.7)]	2	1.61	0.000657664	0.88	0.101251	0.73	0.04424
AGVRPSSSGSAWEACSEAPSK	Q12789	GTF3C1	General transcription factor 3C polypeptide 1	Q12789 [839-859]	S(6): 4.2; S(7): 45.8; S(8): 45.8; S(10): 4.2; S(16): 0.0; S(20): 0.0		2	1.45	0.00292808	0.43	0.539473	1.01	0.0446734
RPPGPTTSPASTSLSSPGQR	Q01970	PLCB3	1-phosphatidylinositol 4,5-bisphosphate phosphodiesterase beta-3	Q01970 [919-938]	T(6): 0.1; T(7): 9.5; S(8): 90.4; S(11): 0.0; T(12): 0.0; S(13): 0.0; S(15): 0.0; S(16): 0.0	Q01970 1xPhospho [S926(90.4)]	2	-0.3	0.12071	0.25	0.227906	-0.56	0.0447096
KLISSSQVDQETGFNR	O43164	PJA2	E3 ubiquitin-protein ligase Praja-2	O43164 [320-335]	S(4): 90.9; S(5): 8.3; S(6): 0.8; T(12): 0.0	O43164 1xPhospho [S323(90.9)]	1	0.59	0.0546573	-0.52	0.407612	1.11	0.0447405
SGEISLPIKEEPSPISK	Q9ULH7	MKL2	MKL/myocardin-like protein 2	Q9ULH7 [909-925]	S(1): 0.0; S(5): 0.0; S(13): 100.0; S(16): 0.0	Q9ULH7 1xPhospho [S921(100)]	1	1.81	0.000376629	1.16	0.0416932	0.64	0.0449753
LIPNATGTGTFSPGASPGSEAR	Q16512	PKN1	Serine/threonine-protein kinase N1	Q16512 [522-543]	T(6): 0.0; T(8): 0.0; T(10): 0.0; S(12): 0.0; S(16): 90.2; S(19): 9.8	Q16512 1xPhospho [S537(90.2)]	1	-0.22	0.267315	0.35	0.129047	-0.56	0.0449753
ITESSLVEITEHKDFTLK	Q99590	SCAF11	Protein SCAF11	Q99590 [584-601]	T(2): 1.1; S(4): 9.5; S(5): 89.4; T(10): 0.0; T(16): 0.0	Q99590 1xPhospho [S588(89.4)]	5	1.34	0.000422757	0.79	0.0520891	0.55	0.0451027
YQPLASTASDNDFVTPEPR	Q15021	NCAPD2	Condensin complex subunit 1	Q15021 [1325-1343]	Y(1): 0.0; S(6): 0.0; T(7): 0.0; S(9): 0.0; T(15): 100.0	Q15021 1xPhospho [T1339(100)]	6	0.78	0.00768132	0.04	0.927303	0.73	0.0453822
NSDMHLLDLESMGK	Q9Y3P9	RABGAP1	Rab GTPase-activating protein 1	Q9Y3P9 [359-372]	S(2): 100.0; S(11): 0.0	Q9Y3P9 1xPhospho [S360(100)]	1	2.04	0.00167873	2.64	0.00132178	-0.6	0.0454731
SQTPPGVATPPIPK	Q15648	MED1	Mediator of RNA polymerase II transcription subunit 1	Q15648 [1049-1062]	S(1): 7.3; T(3): 92.7; T(9): 100.0	Q15648 2xPhospho [T1051(92.7); T1057(100)]	3	1.05	0.00450997	0.2	0.716823	0.85	0.0454731
AQVPGPLTPEMEAR	Q9H8Y5	ANKZF1	Ankyrin repeat and zinc finger domain-containing protein 1	Q9H8Y5 [600-613]	T(8): 100.0	Q9H8Y5 1xPhospho [T607(100)]	1	0.14	0.423443	-0.57	0.0900828	0.72	0.0454731
KPALGFYDTSEENYQALDADFR	Q99459	CDC5L	Cell division cycle 5-like protein	Q99459 [219-240]	Y(7): 47.6; T(9): 47.6; S(10): 4.7; Y(14): 0.0	Q99459 1xPhospho [T227(83.2)]	4	0.07	0.749058	-0.73	0.0508536	0.79	0.0454776
DLDLLASVPSPSSSGSR	Q8WU79	SMAP2	Stromal membrane-associated protein 2	Q8WU79 [210-226]	S(7): 0.0; S(10): 43.4; S(12): 4.4; S(13): 4.4; S(14): 4.4; S(16): 43.4		2	0.53	0.0207314	-0.11	0.741897	0.64	0.0456047
TSLEVSPNPEPPEKPVRTPEAK	Q9UBW5	BIN2	Bridging integrator 2	Q9UBW5 [461-482]	T(1): 0.0; S(2): 0.1; S(6): 99.9; T(18): 100.0	Q9UBW5 2xPhospho [S466(97.9); T478(100)]	2	1.18	0.00137217	0.5	0.243429	0.69	0.046059
SRGSTNLFSK	P27448	MARK3	MAP/microtubule affinity-regulating kinase 3	P27448 [598-607]	S(1): 5.3; S(4): 94.3; T(5): 0.3; S(9): 0.0		2	0.22	0.355711	-0.72	0.104698	0.93	0.0461287
GTGLQPGEEELPDIAPPLVTPDEPK	P45974	USP5	Ubiquitin carboxyl-terminal hydrolase 5	P45974 [604-628]	T(2): 0.0; T(20): 100.0	P45974 1xPhospho [T623(100)]	1	1.13	0.00142196	0.47	0.251197	0.67	0.0466083
MGSSPLEVPKPR	Q8NCE2	MTMR14	Myotubularin-related protein 14	Q8NCE2 [527-538]	S(3): 6.2; S(4): 93.8	Q8NCE2 1xPhospho [S530(93.8)]	1	1.12	0.00434321	0.23	0.691882	0.89	0.0466083
NMTVEQLLTGSPTSPTVEPEKPTR	Q9C0C9	UBE2O	E2/E3 hybrid ubiquitin-protein ligase UBE2O	Q9C0C9 [826-849]	T(3): 0.0; T(9): 0.0; S(11): 0.0; T(13): 10.6; S(14): 78.8; T(16): 10.6; T(23): 0.0	Q9C0C9 1xPhospho [S839(78.8)]	3	-0.54	0.0367066	0.17	0.548417	-0.71	0.0466083
RPQTPKEEAQALEDLTGFK	P46013	MKI67	Antigen KI-67	P46013 [1332-1350]	T(4): 100.0; T(16): 0.0	P46013 1xPhospho [T1335(100)]	1	0.39	0.146745	-0.7	0.207516	1.11	0.0466924
AQAAAPASVPAQAPK	P47914	RPL29	60S ribosomal protein L29	P47914 [135-149]	S(8): 100.0	P47914 1xPhospho [S142(100)]	1	0.99	0.00216292	0.33	0.398176	0.66	0.0467259
WADPQISESNFSPK	Q9BW91	NUDT9	ADP-ribose pyrophosphatase, mitochondrial	Q9BW91 [110-123]	S(7): 0.0; S(9): 0.0; S(12): 100.0	Q9BW91 1xPhospho [S121(100)]	1	1.05	0.0046561	0.22	0.716826	0.84	0.0467323
SLSQGSTNSNMLDVQGGAHK	Q8TEU7	RAPGEF6	Rap guanine nucleotide exchange factor 6	Q8TEU7 [1068-1087]	S(1): 1.0; S(3): 96.0; S(6): 1.0; T(7): 1.0; S(9): 1.0	Q8TEU7 1xPhospho [S1070(96)]	1	0.8	0.0147654	1.36	0.00322448	-0.56	0.0467323
QPPTAAGRPVDASPR	Q9Y6G9	DYNC1LI1	Cytoplasmic dynein 1 light intermediate chain 1	Q9Y6G9 [386-400]	T(4): 0.0; S(13): 100.0	Q9Y6G9 1xPhospho [S398(100)]	1	2.31	0.00264317	0.98	0.478804	1.33	0.0469565
HYGITSPISLASPK	Q9BWT3	PAPOLG	Poly(A) polymerase gamma	Q9BWT3 [18-31]	Y(2): 33.3; T(5): 33.3; S(6): 33.3; S(9): 0.1; S(12): 0.0		3	0.83	0.00262922	0.23	0.473012	0.6	0.0474302
LYSILQGDSPTK	O15042	U2SURP	U2 snRNP-associated SURP motif-containing protein	O15042 [477-488]	Y(2): 0.0; S(3): 0.0; S(9): 100.0; T(11): 0.0	O15042 1xPhospho [S485(99.9)]	2	-0.17	0.369028	0.36	0.104548	-0.53	0.0475684
RALSSAGPIPIRPPIVPVK	Q765P7	MTSS1L	MTSS1-like protein	Q765P7 [576-594]	S(4): 7.8; S(5): 92.2	Q765P7 1xPhospho [S580(92.2)]	2	0.55	0.0576427	-0.21	0.415086	0.76	0.047797
VEGEVDPEPVYIPTPSVIEPMKPLLLPQPEVLSPTVK	Q8IWI9	MGA	MAX gene-associated protein	Q8IWI9 [1163-1199]	Y(11): 0.0; T(14): 0.0; S(16): 0.0; S(33): 83.2; T(35): 16.8	Q8IWI9 1xPhospho [S1195(83.2)]	1	0.6	0.00596279	0.08	0.807008	0.52	0.0478156
KSVLCSTPTINIPASPFMQK	Q96KB5	PBK	Lymphokine-activated killer T-cell-originated protein kinase	Q96KB5 [18-37]	S(2): 0.8; S(6): 98.3; T(7): 0.8; T(9): 0.1; S(15): 100.0	Q96KB5 2xPhospho [S23(98.3); S32(100)]	1	1.5	0.000965533	0.77	0.155312	0.72	0.0479891
SIFASPESVTGK	O75940	SMNDC1	Survival of motor neuron-related-splicing factor 30	O75940 [197-208]	S(1): 93.8; S(5): 6.2; S(8): 0.0; T(10): 0.0	O75940 1xPhospho [S197(93.8)]	1	0.81	0.0151578	-0.07	0.879461	0.88	0.0479891
VTPLPSLASPAVPAPGYCSR	Q8NCD3	HJURP	Holliday junction recognition protein	Q8NCD3 [177-196]	T(2): 0.8; S(6): 49.6; S(9): 49.6; Y(17): 0.0; S(19): 0.0		1	0.79	0.00828088	0.06	0.935183	0.73	0.0479891
SLPREESAGAAPGEGPEGVDGR	Q00722	PLCB2	1-phosphatidylinositol 4,5-bisphosphate phosphodiesterase beta-2	Q00722 [958-979]	S(1): 100.0; S(7): 0.0	Q00722 1xPhospho [S958(100)]	1	0.54	0.0279852	-0.19	0.655909	0.72	0.0480008
LISPLASPADGVK	Q8WYP5	AHCTF1	Protein ELYS	Q8WYP5 [2220-2232]	S(3): 100.0; S(7): 100.0	Q8WYP5 2xPhospho [S2222(100); S2226(100)]	3	1.59	0.00300621	0.55	0.518897	1.04	0.0480251
AECTEESIVEQTYAPAECVSQAIDINEPIGNLK	Q06546	GABPA	GA-binding protein alpha chain	Q06546 [20-52]	T(4): 12.1; S(7): 87.9; T(12): 0.0; Y(13): 0.0; S(20): 0.0	Q06546 1xPhospho [S26(87.9)]	1	1.09	0.00247277	1.55	0.00177349	-0.46	0.0487374
SPFNSPSPQDSPR	P08651	NFIC	Nuclear factor 1 C-type	P08651 [333-345]	S(1): 0.0; S(5): 0.0; S(7): 100.0; S(11): 0.0	P08651 1xPhospho [S339(100)]	1	0.13	0.618862	0.75	0.0222126	-0.62	0.0487374
VGSLTPPSSPK	Q2M2I8	AAK1	AP2-associated protein kinase 1	Q2M2I8 [616-626]	S(3): 0.0; T(5): 100.0; S(8): 4.4; S(9): 95.6	Q2M2I8 2xPhospho [T620(100); S624(100)]	12	-0.21	0.249183	0.3	0.148505	-0.51	0.049037
SQEMVHLVNK	P16070	CD44	CD44 antigen	P16070 [706-715]	S(1): 100.0	P16070 1xPhospho [S706(100)]	1	-0.97	0.0149274	-0.03	0.895432	-0.93	0.0492867
SSQPSPTAVPASDSPPTK	Q3KQU3	MAP7D1	MAP7 domain-containing protein 1	Q3KQU3 [112-129]	S(1): 0.0; S(2): 0.0; S(5): 0.0; T(7): 0.0; S(12): 0.1; S(14): 99.9; T(17): 0.1	Q3KQU3 1xPhospho [S125(99.9)]	2	-0.74	0.00432984	-0.12	0.663827	-0.63	0.049539
TDNSSLSSPLNPK	Q9UIG0	BAZ1B	Tyrosine-protein kinase BAZ1B	Q9UIG0 [323-335]	T(1): 0.0; S(4): 0.0; S(5): 0.0; S(7): 5.2; S(8): 94.8	Q9UIG0 1xPhospho [S330(94.8)]	1	1.24	0.00242232	0.45	0.41878	0.79	0.0497363
SSLYGIAK	Q5VZ89	DENND4C	DENN domain-containing protein 4C	Q5VZ89 [947-954]	S(1): 4.1; S(2): 95.9; Y(4): 0.0	Q5VZ89 1xPhospho [S948(95.9)]	1	1.15	0.000965974	0.52	0.150522	0.63	0.0499987
RQSSPSCGPVAETSSIGNGDGISK	Q9Y4K4	MAP4K5	Mitogen-activated protein kinase kinase kinase kinase 5	Q9Y4K4 [431-454]	S(3): 9.0; S(4): 9.0; S(6): 82.0; T(13): 0.0; S(14): 0.0; S(15): 0.0; S(23): 0.0	Q9Y4K4 1xPhospho [S436(82)]	1	0.62	0.00852102	0.06	0.929236	0.56	0.0500784
SPGSPPGPELPIETALDDR	Q8TEW0	PARD3	Partitioning defective 3 homolog	Q8TEW0 [692-710]	S(1): 50.0; S(4): 50.0; T(14): 0.0		1	0.01	0.977455	0.57	0.0362854	-0.56	0.0500784
FQPHFGQQECVSPYR	P25054	APC	Adenomatous polyposis coli protein	P25054 [1089-1103]	S(12): 91.2; Y(14): 8.8	P25054 1xPhospho [S1100(91.2)]	1	1.77	0.000452595	1.05	0.0530128	0.72	0.0500926
TLSVAAAFNEDEDSEPEEMPPEAK	Q8WW12	PCNP	PEST proteolytic signal-containing nuclear protein	Q8WW12 [106-129]	T(1): 0.0; S(3): 0.0; S(14): 100.0	Q8WW12 1xPhospho [S119(100)]	14	-0.56	0.0196624	0.06	0.801903	-0.62	0.0500926
GGPFWPQVTLNSQDRDER	Q8NDX1	PSD4	PH and SEC7 domain-containing protein 4	Q8NDX1 [402-419]	T(9): 0.0; S(12): 100.0	Q8NDX1 1xPhospho [S413(100)]	1	0.8	0.00678511	0.1	0.836759	0.7	0.0500955
LPDSSPFSSFISVMPTK	O60281	ZNF292	Zinc finger protein 292	O60281 [1806-1822]	S(4): 99.4; S(5): 0.6; S(8): 0.0; S(9): 0.0; S(12): 0.0; T(16): 0.0	O60281 1xPhospho [S1809(99.4)]	2	0.79	0.00561929	0.13	0.760615	0.65	0.0500955
CTGDFSPSPEK	Q5VWN6	FAM208B	Protein FAM208B	Q5VWN6 [1534-1544]	T(2): 0.0; S(6): 0.0; S(8): 100.0	Q5VWN6 1xPhospho [S1541(100)]	1	0.06	0.839606	0.72	0.0300851	-0.67	0.0500955
PFSAPKPQTSPSPK	Q01518	CAP1	Adenylyl cyclase-associated protein 1	Q01518 [299-312]	S(3): 0.0; T(9): 93.1; S(10): 6.5; S(12): 0.5	Q01518 1xPhospho [T307(93)]	1	-1.47	0.0025228	-0.26	0.434052	-1.21	0.0500955
IHIPGGLSPESK	P57772	EEFSEC	Selenocysteine-specific elongation factor	P57772 [530-541]	S(8): 100.0; S(11): 0.0	P57772 1xPhospho [S537(100)]	2	0.49	0.0198578	-0.08	0.80456	0.57	0.0507487
KANLLDSMFGSPGGLR	Q9HBE1	PATZ1	POZ-, AT hook-, and zinc finger-containing protein 1	Q9HBE1 [272-287]	S(7): 0.0; S(11): 100.0	Q9HBE1 1xPhospho [S282(100)]	1	0.32	0.165888	-0.65	0.205807	0.98	0.0507487
SEKVPSSPAEAEKGPSLLLK	Q5TAX3	ZCCHC11	Terminal uridylyltransferase 4	Q5TAX3 [150-169]	S(1): 0.0; S(6): 13.4; S(7): 86.6; S(16): 0.1	Q5TAX3 1xPhospho [S156(86.6)]	1	1.28	0.00317244	0.42	0.519217	0.86	0.0508472
LPSKPKEEVPHAEEFLDDSTVWGIR	O43683	BUB1	Mitotic checkpoint serine/threonine-protein kinase BUB1	O43683 [561-585]	S(3): 100.0; S(19): 0.0; T(20): 0.0	O43683 1xPhospho [S563(100)]	1	0.58	0.016191	-0.06	0.880123	0.64	0.0509466
RRTTDFSDFLSIVGCTK	Q9UHD1	CHORDC1	Cysteine and histidine-rich domain-containing protein 1	Q9UHD1 [45-61]	T(3): 93.4; T(4): 6.6; S(7): 0.0; S(11): 0.0; T(16): 0.0	Q9UHD1 1xPhospho [T47(93.4)]	2	1.91	0.000128495	1.43	0.00704724	0.48	0.0512499
TPQAPASANLVGPR	Q9UQ35	SRRM2	Serine/arginine repetitive matrix protein 2	Q9UQ35 [2329-2342]	T(1): 100.0; S(7): 0.0	Q9UQ35 1xPhospho [T2329(100)]	2	1.04	0.00306531	0.32	0.501753	0.71	0.0512499
CSGEFLPQTAR	P57075	UBASH3A	Ubiquitin-associated and SH3 domain-containing protein A	P57075 [371-381]	S(2): 100.0; T(9): 0.0	P57075 1xPhospho [S372(100)]	1	0.19	0.485226	0.84	0.0192285	-0.65	0.0512499
TSLEVSPNPEPPEKPVR	Q9UBW5	BIN2	Bridging integrator 2	Q9UBW5 [461-477]	T(1): 6.7; S(2): 93.3; S(6): 0.0	Q9UBW5 1xPhospho [S466(100)]	2	-0.43	0.0651912	0.2	0.409379	-0.62	0.0512499
SIQDLTVTGTEPGQVSSR	O43318	MAP3K7	Mitogen-activated protein kinase kinase kinase 7	O43318 [439-456]	S(1): 0.0; T(6): 0.0; T(8): 0.0; T(10): 0.0; S(16): 9.1; S(17): 90.9		3	-0.17	0.422307	0.39	0.101765	-0.57	0.0517356
RDSALQQLR	Q6P2H3	CEP85	Centrosomal protein of 85 kDa	Q6P2H3 [621-629]	S(3): 100.0	Q6P2H3 1xPhospho [S623(100)]	1	1.07	0.00230605	0.42	0.381937	0.65	0.0518953
LTTSPAQNAQQLHER	Q92556	ELMO1	Engulfment and cell motility protein 1	Q92556 [77-91]	T(2): 0.8; T(3): 8.1; S(4): 91.1	Q92556 1xPhospho [S80(91.1)]	2	1.62	0.00871627	0.15	0.921216	1.47	0.0520663
DYTGCSTSESLSPVK	O95297	MPZL1	Myelin protein zero-like protein 1	O95297 [199-213]	Y(2): 0.0; T(3): 0.0; S(6): 0.0; T(7): 0.0; S(8): 0.0; S(10): 0.0; S(12): 100.0	O95297 1xPhospho [S210(100)]	1	0.63	0.0173822	1.09	0.00370472	-0.46	0.0521519
SQGKPKTPVSSQAPVPAK	Q92835	INPP5D	Phosphatidylinositol 3,4,5-trisphosphate 5-phosphatase 1	Q92835 [1102-1119]	S(1): 0.2; T(7): 80.8; S(10): 9.5; S(11): 9.5	Q92835 1xPhospho [T1108(80.8)]	3	1.99	0.00270854	0.81	0.445003	1.18	0.0521945
KKAEPSEVDMNSPK	Q9NR30	DDX21	Nucleolar RNA helicase 2	Q9NR30 [60-73]	S(6): 0.0; S(12): 100.0	Q9NR30 1xPhospho [S71(100)]	1	1.52	0.000676595	0.89	0.0900828	0.65	0.0521945
GVQVPASPDTVPQPSLR	Q92613	PHF16; JADE3	Protein Jade-3	Q92613 [79-95]	S(7): 100.0; T(10): 0.0; S(15): 0.0	Q92613 1xPhospho [S85(100)]	1	-0.13	0.598297	0.47	0.0745662	-0.6	0.0529185
EMFPYEASTPTGISASCR	P42167	TMPO	Lamina-associated polypeptide 2, isoforms beta/gamma	P42167 [347-364]	Y(5): 0.0; S(8): 50.0; T(9): 50.0; T(11): 0.0; S(14): 0.0; S(16): 0.0		3	1.88	0.00290957	0.7	0.465995	1.19	0.0529846
RLSSASTGKPPLSVEDDFEK	O75152	ZC3H11A	Zinc finger CCCH domain-containing protein 11A	O75152 [756-775]	S(3): 91.0; S(4): 9.1; S(6): 90.9; T(7): 9.0; S(13): 0.0	O75152 2xPhospho [S758(91); S761(82.9)]	2	1.23	0.00349386	0.37	0.539473	0.86	0.0529846
RPTPNDDTLDEGVGLVHSNIATEHIPSPAKK	Q01581	HMGCS1	Hydroxymethylglutaryl-CoA synthase, cytoplasmic	Q01581 [469-499]	T(3): 0.0; T(8): 0.0; S(18): 1.4; T(22): 98.6; S(27): 100.0	Q01581 2xPhospho [T476(93.6); S495(97.9)]	2	1.29	0.000456756	0.77	0.0508536	0.52	0.0532227
TQVLSPDSLFTAK	P55196	MLLT4	Afadin	P55196 [1717-1729]	T(1): 49.9; S(5): 49.9; S(8): 0.2; T(11): 0.0		2	1.37	0.00243209	0.57	0.393913	0.8	0.0533139
SEDSTKDDIDLDALAAEIEGAGAAK	O60841	EIF5B	Eukaryotic translation initiation factor 5B	O60841 [9-33]	S(1): 12.0; S(4): 76.0; T(5): 12.0	O60841 1xPhospho [S12(76)]	5	1.07	0.00933294	0.08	0.932994	0.99	0.0533139
VLSPGVSHR	Q14676	MDC1	Mediator of DNA damage checkpoint protein 1	Q14676 [106-114]	S(3): 100.0; S(7): 0.0	Q14676 1xPhospho [S108(100)]	1	0.76	0.0174027	-0.1	0.874161	0.86	0.0533139
VDNFVANHLATHTWSPHLNK	Q8NFC6	BOD1L1	Biorientation of chromosomes in cell division protein 1-like 1	Q8NFC6 [91-110]	T(11): 5.8; T(13): 47.1; S(15): 47.1		1	0.43	0.0943231	-0.44	0.327979	0.88	0.0533139
APSYSGLSMVSGVK	Q9UBP0	SPAST	Spastin	Q9UBP0 [266-279]	S(3): 48.1; Y(4): 48.1; S(5): 3.8; S(8): 0.0; S(11): 0.0		4	0.3	0.172632	-0.49	0.209764	0.8	0.0533139
TSSGLGGSTTDFLEEWK	Q96IZ0	PAWR	PRKC apoptosis WT1 regulator protein	Q96IZ0 [8-24]	T(1): 0.0; S(2): 0.0; S(3): 0.0; S(8): 50.0; T(9): 50.0; T(10): 0.0		5	3.09	0.00581691	1.02	0.74606	2.06	0.0536919
KGVSQTGTPVCEEDGDAGLGIR	Q12888	TP53BP1	Tumor suppressor p53-binding protein 1	Q12888 [1365-1386]	S(4): 88.8; T(6): 11.0; T(8): 0.2	Q12888 1xPhospho [S1368(88.8)]	2	1.65	0.00267411	0.65	0.427075	1	0.0539033
SSYSSPTSLSPR	Q96JY6	PDLIM2	PDZ and LIM domain protein 2	Q96JY6 [120-131]	S(1): 0.0; S(2): 0.0; Y(3): 0.0; S(4): 0.0; S(5): 0.0; T(7): 0.0; S(8): 0.2; S(10): 99.8	Q96JY6 1xPhospho [S124(88.9)]	2	-0.12	0.647816	0.55	0.0716483	-0.66	0.0549527
DLVVPGSKPSGNDSCELR	P33981	TTK	Dual specificity protein kinase TTK	P33981 [308-325]	S(7): 0.0; S(10): 0.0; S(14): 100.0	P33981 1xPhospho [S321(100)]	2	1.26	0.0154035	-0.11	0.926792	1.37	0.0553687
EILAGKPAAQKSPSDLLDASAVSATSR	O60499	STX10	Syntaxin-10	O60499 [121-147]	S(12): 98.1; S(14): 1.9; S(20): 0.0; S(23): 0.0; T(25): 0.0; S(26): 0.0	O60499 1xPhospho [S132(98.1)]	2	1.01	0.00413477	0.36	0.593482	0.66	0.0553687
IGPLGLSPK	P30050	RPL12	60S ribosomal protein L12	P30050 [32-40]	S(7): 100.0	P30050 1xPhospho [S38(100)]	2	1.24	0.000395147	0.76	0.0372628	0.49	0.0553774
VPASETSPGPPPMGPPPPSSK	Q9HD15	SRA1	Steroid receptor RNA activator 1	Q9HD15 [63-83]	S(4): 46.5; T(6): 7.0; S(7): 46.5; S(19): 0.0; S(20): 0.0		1	0.87	0.00418462	0.21	0.598721	0.66	0.0553774
SIVECQPDASATPGVGTADSPAAPTDSRDDQK	Q7Z2Z1	TICRR	Treslin	Q7Z2Z1 [1394-1425]	S(1): 0.0; S(10): 0.0; T(12): 0.0; T(17): 0.3; S(20): 99.6; T(25): 0.1; S(27): 0.0	Q7Z2Z1 1xPhospho [S1413(99.6)]	1	0.45	0.0289922	-0.05	0.707894	0.5	0.0553774
FGSADNIPNLK	O94876	TMCC1	Transmembrane and coiled-coil domains protein 1	O94876 [380-390]	S(3): 100.0	O94876 1xPhospho [S382(100)]	1	-0.98	0.0113179	0.03	0.981219	-1.01	0.0553774
AGQTQPNPGILPIQPALTPR	Q2M2I8	AAK1	AP2-associated protein kinase 1	Q2M2I8 [372-391]	T(4): 0.0; T(18): 100.0	Q2M2I8 1xPhospho [T389(100)]	2	2.08	0.00122804	1.14	0.179263	0.94	0.0555304
SSSSSGVPYSPAIPNKR	Q9UPT5	EXOC7	Exocyst complex component 7	Q9UPT5 [241-257]	S(1): 32.3; S(2): 32.3; S(3): 32.3; S(4): 2.9; S(5): 0.3; Y(9): 0.0; S(10): 0.0	Q9UPT5 1xPhospho [S242(91.1)]	2	0.59	0.0458657	1.15	0.00589212	-0.56	0.0555304
SSRGGSPDLWK	Q96JM3	CHAMP1	Chromosome alignment-maintaining phosphoprotein 1	Q96JM3 [471-481]	S(1): 50.0; S(2): 50.0; S(6): 100.0	Q96JM3 2xPhospho [S476(100); S]	3	0.59	0.0290788	1.1	0.00494221	-0.51	0.0555304
KPALGFYDTSEENYQALDADFRK	Q99459	CDC5L	Cell division cycle 5-like protein	Q99459 [219-241]	Y(7): 0.0; T(9): 50.0; S(10): 50.0; Y(14): 0.0		3	0.39	0.0409113	-0.15	0.58933	0.53	0.0555304
ALSEEMADTLEEGSASPTSPDYSLDSPGPEK	O75995	SASH3	SAM and SH3 domain-containing protein 3	O75995 [95-125]	S(3): 0.0; T(9): 0.0; S(14): 0.0; S(16): 97.7; T(18): 1.1; S(19): 0.1; Y(22): 1.1; S(23): 0.0; S(26): 0.0		10	0.35	0.116797	0.84	0.00846357	-0.49	0.0555304
TSAAACAVTDLSDDSDFDEK	Q9NQZ2	UTP3	Something about silencing protein 10	Q9NQZ2 [354-373]	T(1): 0.0; S(2): 0.0; T(9): 0.0; S(12): 100.0; S(15): 100.0	Q9NQZ2 2xPhospho [S365(100); S368(100)]	3	-0.64	0.0152431	0.01	0.934064	-0.65	0.0555304
LVGMDPEQASVTNQNEYAR	Q5W0Z9	ZDHHC20	Probable palmitoyltransferase ZDHHC20	Q5W0Z9 [296-314]	S(10): 96.6; T(12): 3.2; Y(17): 0.2	Q5W0Z9 1xPhospho [S305(98.3)]	2	-0.73	0.0651445	0.06	0.440202	-0.78	0.0555304
VGVSSKPDSSPVLSPGNK	Q8N4C8	MINK1	Misshapen-like kinase 1	Q8N4C8 [769-786]	S(4): 0.6; S(5): 5.2; S(9): 47.1; S(10): 47.1; S(14): 0.0		1	-1.58	9.91491e-05	-0.9	0.0043624	-0.68	0.0555304
ITVNPDSEELFSDNENNFVFQVANER	P51587	BRCA2	Breast cancer type 2 susceptibility protein	P51587 [873-898]	T(2): 0.0; S(7): 0.0; S(12): 100.0	P51587 1xPhospho [S884(100)]	1	0.11	0.541333	0.45	0.0222126	-0.35	0.0556255
SLPAGDALYLSFNPPQPSR	Q92974	ARHGEF2	Rho guanine nucleotide exchange factor 2	Q92974 [886-904]	S(1): 100.0; Y(9): 0.0; S(11): 0.0; S(18): 0.0	Q92974 1xPhospho [S886(100)]	6	1.54	0.00076396	0.87	0.0987916	0.67	0.0558788
HSSNPPLESHVGWVMDSR	Q6PKG0	LARP1	La-related protein 1	Q6PKG0 [822-839]	S(2): 11.6; S(3): 88.4; S(9): 0.0; S(17): 0.0	Q6PKG0 1xPhospho [S824(88.4)]	1	0.8	0.037576	-0.37	0.623119	1.17	0.0558788
GPHHLDNSSPGPGSEAR	Q8WWM7	ATXN2L	Ataxin-2-like protein	Q8WWM7 [383-399]	S(8): 0.0; S(9): 100.0; S(14): 0.0	Q8WWM7 1xPhospho [S391(100)]	2	2.86	0.00284798	1.38	0.432106	1.47	0.0560628
LEAIITPPPAK	O75367	H2AFY	Core histone macro-H2A.1	O75367 [124-134]	T(6): 100.0	O75367 1xPhospho [T129(100)]	6	1.11	0.00147675	0.51	0.217322	0.6	0.0560628
LPSSPLGCR	Q8NCD3	HJURP	Holliday junction recognition protein	Q8NCD3 [639-647]	S(3): 7.1; S(4): 92.9	Q8NCD3 1xPhospho [S642(92.9)]	1	0.97	0.00101495	0.47	0.14167	0.49	0.0560628
RYELPAPSSGQK	O75934	BCAS2	Pre-mRNA-splicing factor SPF27	O75934 [86-97]	Y(2): 0.0; S(8): 93.6; S(9): 6.4	O75934 1xPhospho [S93(93.6)]	1	0.96	0.00545339	0.25	0.695608	0.71	0.0560628
SEMTPEELQKREEEEFNTGPLSVLTQSVK	P62316	SNRPD2	Small nuclear ribonucleoprotein Sm D2	P62316 [9-37]	S(1): 0.8; T(4): 16.0; T(18): 79.9; S(22): 3.4; T(25): 0.0; S(27): 0.0	P62316 1xPhospho [T26(79.9)]	5	-0.01	0.960135	-0.81	0.0398939	0.8	0.0560628
KEPPRASPPGGLAEPPGSAGPQAGPTVVPGSATPMETGIAETPEGR	O60341	KDM1A	Lysine-specific histone demethylase 1A	O60341 [63-108]	S(7): 5.8; S(18): 15.6; T(26): 44.7; S(31): 15.6; T(33): 15.6; T(37): 2.3; T(42): 0.4		1	-0.04	0.874077	0.49	0.051607	-0.52	0.0560628
SNSTGQINFSPGDNQAQSEIGEQQLDFNSTVK	Q2KHR2	RFX7	DNA-binding protein RFX7	Q2KHR2 [1223-1254]	S(1): 1.3; S(3): 49.4; T(4): 49.4; S(10): 0.0; S(18): 0.0; S(29): 0.0; T(30): 0.0		5	-0.33	0.166708	0.31	0.226621	-0.65	0.0560628
PTEATVSLSSLVDYPHQAR	Q92619	HMHA1	Minor histocompatibility protein HA-1	Q92619 [943-961]	T(2): 0.0; T(5): 0.0; S(7): 0.0; S(9): 99.5; S(10): 0.5; Y(14): 0.0	Q92619 1xPhospho [S951(99.5)]	1	-0.78	0.0189198	0.06	0.868715	-0.84	0.0560628
TPSTPVACSTPAQLK	Q6PL18	ATAD2	ATPase family AAA domain-containing protein 2	Q6PL18 [1149-1163]	T(1): 0.0; S(3): 0.0; T(4): 0.0; S(9): 50.0; T(10): 50.0		1	0.37	0.0810918	0.83	0.00732567	-0.46	0.0561272
AKRPSVSFAEGTK	Q14162	SCARF1	Scavenger receptor class F member 1	Q14162 [585-597]	S(5): 99.9; S(7): 0.1; T(12): 0.0	Q14162 1xPhospho [S589(99.9)]	1	-0.02	0.819631	-1.32	0.0327136	1.3	0.0561272
IISVTPVK	Q29RF7	PDS5A	Sister chromatid cohesion protein PDS5 homolog A	Q29RF7 [1204-1211]	S(3): 0.0; T(5): 100.0	Q29RF7 1xPhospho [T1208(100)]	1	0.83	0.00842105	0.1	0.873389	0.73	0.0564632
TGQAGSLSGSPKPFSPQLSAPITTK	Q9ULU4	ZMYND8	Protein kinase C-binding protein 1	Q9ULU4 [481-505]	T(1): 0.4; S(6): 12.6; S(8): 12.6; S(10): 74.3; S(15): 0.1; S(19): 0.0; T(23): 0.0; T(24): 0.0		2	-0.49	0.0807231	0.24	0.388405	-0.73	0.0566876
LELKASPNVEAPQPHR	P50851	LRBA	Lipopolysaccharide-responsive and beige-like anchor protein	P50851 [1256-1271]	S(6): 100.0	P50851 1xPhospho [S1261(100)]	1	0.06	0.77673	-0.72	0.0610206	0.78	0.0567116
APPASGDGFEPQMVKSPSFGGASEASAR	Q8WVT3	TRAPPC12	Trafficking protein particle complex subunit 12	Q8WVT3 [167-194]	S(5): 0.0; S(16): 49.3; S(18): 49.3; S(23): 1.4; S(26): 0.1		1	0.91	0.00254606	0.28	0.386247	0.62	0.0568117
TAQETSTMTMNVSQVDDVVSSK	Q8WYP5	AHCTF1	Protein ELYS	Q8WYP5 [1717-1738]	T(1): 0.0; T(5): 0.0; S(6): 0.0; T(7): 0.0; T(9): 0.0; S(13): 99.9; S(20): 0.0; S(21): 0.0	Q8WYP5 1xPhospho [S1729(99.9)]	1	1.41	0.00147657	0.68	0.21228	0.73	0.0568356
AAALSLSTLASPK	P98172	EFNB1	Ephrin-B1	P98172 [277-289]	S(5): 100.0; S(7): 0.0; T(8): 0.0; S(11): 100.0	P98172 2xPhospho [S281(100); S287(100)]	1	1.11	0.013615	0.01	0.982872	1.1	0.0568356
SQEDLNEPIK	Q7Z460	CLASP1	CLIP-associating protein 1	Q7Z460 [1196-1205]	S(1): 100.0	Q7Z460 1xPhospho [S1196(100)]	2	-0.64	0.00828088	-0.04	0.86438	-0.59	0.0568356
LALSPLSLGK	P49454	CENPF	Centromere protein F	P49454 [3116-3125]	S(4): 50.0; S(7): 50.0		3	0.32	0.0978096	-0.29	0.345211	0.62	0.0571587
AFHAALRNSPVNTK	Q9BPX5	ARPC5L	Actin-related protein 2/3 complex subunit 5-like protein	Q9BPX5 [56-69]	S(9): 100.0; T(13): 0.0	Q9BPX5 1xPhospho [S64(100)]	2	0.6	0.00745712	0.07	0.812089	0.52	0.0571918
SRSTTELDDYSTNK	Q8WWI1	LMO7	LIM domain only protein 7	Q8WWI1 [1421-1434]	S(1): 0.0; S(3): 99.9; T(4): 0.1; T(5): 0.0; Y(10): 0.0; S(11): 0.0; T(12): 0.0	Q8WWI1 1xPhospho [S1423(99.9)]	2	0.17	0.429659	0.73	0.0193553	-0.56	0.0574258
EKEPSYPMPVQETQAPESPGENSEQALQTLSPR	Q7Z434	MAVS	Mitochondrial antiviral-signaling protein	Q7Z434 [135-167]	S(5): 0.0; Y(6): 0.0; T(13): 0.0; S(18): 0.0; S(23): 0.0; T(29): 15.0; S(31): 85.0	Q7Z434 1xPhospho [S165(97.2)]	4	0.32	0.151605	0.82	0.0100247	-0.5	0.057734
PQLDLSIDSLDLSCEEGTPLSITSK	Q14980	NUMA1	Nuclear mitotic apparatus protein 1	Q14980 [1716-1740]	S(6): 99.0; S(9): 1.0; S(13): 0.0; T(18): 0.0; S(21): 0.0; T(23): 0.0; S(24): 0.0	Q14980 1xPhospho [S1721(99)]	2	1.15	0.00158816	1.59	0.00144523	-0.44	0.0578943
TSDLRDEASSVTR	Q86VM9	ZC3H18	Zinc finger CCCH domain-containing protein 18	Q86VM9 [109-121]	T(1): 0.3; S(2): 1.8; S(9): 1.8; S(10): 11.6; T(12): 84.5	Q86VM9 1xPhospho [T120(84.5)]	1	-0.28	0.182198	0.29	0.220968	-0.55	0.0579646
VQTLSNQPLLKSPAPPLLHVAALGQK	Q8N163	CCAR2; KIAA1967	Cell cycle and apoptosis regulator protein 2	Q8N163 [113-138]	T(3): 3.4; S(5): 16.0; S(12): 80.6	Q8N163 1xPhospho [S124(80.6)]	1	1.36	0.00133222	0.68	0.184225	0.68	0.0590964
AETLELSDLYVSDK	Q8NDI1	EHBP1	EH domain-binding protein 1	Q8NDI1 [692-705]	T(3): 100.0; S(7): 0.0; Y(10): 0.0; S(12): 0.0	Q8NDI1 1xPhospho [T694(100)]	1	0.8	0.124996	-1.35	0.295896	2.15	0.0590964
NKRDSTEITSILLK	Q8IYU2	HACE1	E3 ubiquitin-protein ligase HACE1	Q8IYU2 [381-394]	S(5): 92.2; T(6): 7.6; T(9): 0.1; S(10): 0.1	Q8IYU2 1xPhospho [S385(92.2)]	1	0.4	0.178283	0.97	0.0111258	-0.56	0.0591635
KPVAGALDVSFNK	Q99627	COPS8	COP9 signalosome complex subunit 8	Q99627 [166-178]	S(10): 100.0	Q99627 1xPhospho [S175(100)]	2	1.7	0.000390768	1.12	0.0340413	0.56	0.0591749
GPTPATPESFSK	P49454	CENPF	Centromere protein F	P49454 [3040-3051]	T(3): 0.2; T(6): 99.8; S(9): 0.0; S(11): 0.0	P49454 1xPhospho [T3045(99.8)]	1	0.82	0.0197463	-0.1	0.87903	0.93	0.0591749
GDFSYIGNLMTK	Q9BPX3	NCAPG	Condensin complex subunit 3	Q9BPX3 [387-398]	S(4): 50.0; Y(5): 50.0; T(11): 0.0		1	0.42	0.0647868	-0.27	0.470702	0.7	0.0591749
LEEAHQAEKPQSPPK	Q92833	JARID2	Protein Jumonji	Q92833 [444-458]	S(12): 100.0	Q92833 1xPhospho [S455(100)]	1	-0.22	0.436214	0.44	0.11416	-0.65	0.0592379
QICVVMLESPPK	P57721	PCBP3	Poly(rC)-binding protein 3	P57721 [193-204]	S(9): 100.0	P57721 1xPhospho [S201(100)]	1	1.03	0.00971359	-0.24	0.900188	1.28	0.0593784
DGVLTLANNVTPAKDVPPLSETEATPVPIK	P27816	MAP4	Microtubule-associated protein 4	P27816 [561-590]	T(5): 0.2; T(11): 99.8; S(20): 0.0; T(22): 0.0; T(25): 0.0	P27816 1xPhospho [T571(99.8)]	1	0.87	0.00554724	0.21	0.677349	0.67	0.0593784
QEALQEDPLESFNYVLSK	Q2NKX8	ERCC6L	DNA excision repair protein ERCC-6-like	Q2NKX8 [854-871]	S(11): 100.0; Y(14): 0.0; S(17): 0.0	Q2NKX8 1xPhospho [S864(100)]	1	1.31	0.0032978	0.45	0.465974	0.86	0.0594531
FEAHPNDLYVEGLPENIPFRSPSWYGIPR	P78347	GTF2I	General transcription factor II-I	P78347 [495-523]	Y(9): 0.0; S(21): 0.2; S(23): 1.7; Y(25): 98.1	P78347 1xPhospho [Y519(98.1)]	2	0.67	0.0233819	-0.12	0.824259	0.8	0.0594906
SEPHSPGIPEIFR	Q8ND82	ZNF280C	Zinc finger protein 280C	Q8ND82 [76-88]	S(1): 0.0; S(5): 100.0	Q8ND82 1xPhospho [S80(100)]	2	0.73	0.0225062	-0.1	0.840842	0.82	0.0599306
ASETPPPVAQPKPEAPHPGLETTLQER	Q6P1N0	CC2D1A	Coiled-coil and C2 domain-containing protein 1A	Q6P1N0 [117-143]	S(2): 0.2; T(4): 99.8; T(22): 0.0; T(23): 0.0	Q6P1N0 1xPhospho [T120(99.8)]	1	0.59	0.0140688	0.01	0.991401	0.57	0.0599306
ASATCSSATAAASSGLEEWTSRSPR	Q96G74	OTUD5	OTU domain-containing protein 5	Q96G74 [430-454]	S(2): 0.0; T(4): 0.0; S(6): 0.0; S(7): 0.0; T(9): 0.0; S(13): 0.0; S(14): 0.0; T(20): 11.0; S(21): 78.0; S(23): 11.0	Q96G74 1xPhospho [S450(78)]	3	-0.79	0.00787149	-0.07	0.816261	-0.73	0.0599306
HSQPATPTPLQSR	Q9NR12	PDLIM7	PDZ and LIM domain protein 7	Q9NR12 [246-258]	S(2): 0.0; T(6): 100.0; T(8): 0.0; S(12): 0.0	Q9NR12 1xPhospho [T251(100)]	1	1.49	0.00609254	0.38	0.708735	1.1	0.0600463
LVLPSNTPNVR	Q03188	CENPC; CENPC1	Centromere protein C	Q03188 [728-738]	S(5): 0.9; T(7): 99.1	Q03188 1xPhospho [T734(99.1)]	2	0.51	0.0202172	-0.04	0.879235	0.56	0.0600463
AAGGAPSPPPPVR	Q4KMP7	TBC1D10B	TBC1 domain family member 10B	Q4KMP7 [672-684]	S(7): 100.0	Q4KMP7 1xPhospho [S678(100)]	6	-0.85	0.00163663	-0.28	0.225246	-0.56	0.0600463
SLDGAAAVDSADRSPRPTSAPAITQGQVAEGGVLDASAK	P11171	EPB41	Protein 4.1	P11171 [542-580]	S(1): 0.1; S(10): 1.0; S(14): 98.8; T(18): 49.8; S(19): 49.8; T(24): 0.5; S(37): 0.0	P11171 2xPhospho [S555(98.8); S/T]	2	0.04	0.911587	0.72	0.0396992	-0.69	0.0601018
SGEGEVSGLMR	Q13263	TRIM28	Transcription intermediary factor 1-beta	Q13263 [473-483]	S(1): 100.0; S(7): 0.1	Q13263 1xPhospho [S473(100)]	1	1.21	0.00244542	0.47	0.349839	0.74	0.0603188
DTASLSTTPSESPR	Q9NQX3	GPHN	Gephyrin	Q9NQX3 [259-272]	T(2): 0.0; S(4): 0.0; S(6): 0.0; T(7): 0.0; T(8): 0.0; S(10): 1.2; S(12): 98.9	Q9NQX3 1xPhospho [S270(98.8)]	2	0.95	0.00574299	0.21	0.680525	0.74	0.0603643
AITSPLAAGSKPSK	Q9UGU5	HMGXB4	HMG domain-containing protein 4	Q9UGU5 [115-128]	T(3): 50.0; S(4): 50.0; S(10): 0.0; S(13): 0.0		1	1.54	0.00119455	0.81	0.157389	0.73	0.0606532
MSVDAVEIETLR	P78347	GTF2I	General transcription factor II-I	P78347 [102-113]	S(2): 100.0; T(10): 0.0	P78347 1xPhospho [S103(100)]	1	1.25	0.00201892	0.53	0.285495	0.73	0.0606532
SMGETESGDAFLDLK	Q9NRA8	EIF4ENIF1	Eukaryotic translation initiation factor 4E transporter	Q9NRA8 [5-19]	S(1): 92.3; T(5): 0.6; S(7): 7.1	Q9NRA8 1xPhospho [S5(92.3)]	2	1.11	0.00082244	0.61	0.0997185	0.5	0.0610338
ETEISLKDSTLDN	O75475	PSIP1	PC4 and SFRS1-interacting protein	O75475 [518-530]	T(2): 0.0; S(5): 0.0; S(9): 99.9; T(10): 0.1	O75475 1xPhospho [S526(99.9)]	2	0.8	0.00342887	0.23	0.466956	0.55	0.0614556
RPTLGVQLDDK	Q13769	THOC5	THO complex subunit 5 homolog	Q13769 [326-336]	T(3): 100.0	Q13769 1xPhospho [T328(100)]	1	1.62	0.00040638	2.03	0.0007308	-0.41	0.0616693
SVAAEGALLPQTPPSPR	Q86X27	RALGPS2	Ras-specific guanine nucleotide-releasing factor RalGPS2	Q86X27 [315-331]	S(1): 0.0; T(12): 100.0; S(15): 100.0	Q86X27 2xPhospho [T326(100); S329(100)]	5	-0.45	0.0796753	0.18	0.424165	-0.63	0.0616693
PQSPVIQAAAVSPK	Q9Y6D5	ARFGEF2	Brefeldin A-inhibited guanine nucleotide-exchange protein 2	Q9Y6D5 [216-229]	S(3): 0.0; S(12): 100.0	Q9Y6D5 1xPhospho [S227(100)]	2	-1.44	0.00119221	-0.4	0.154157	-1.04	0.0616693
AETNSRVSGVDGYETEGIR	Q14566	MCM6	DNA replication licensing factor MCM6	Q14566 [264-282]	T(3): 0.0; S(5): 0.0; S(8): 99.9; Y(13): 0.0; T(15): 0.0	Q14566 1xPhospho [S271(99.9)]	1	0.91	0.00261928	0.32	0.363389	0.59	0.062476
VAADLQLSTPQK	Q9H582	ZNF644	Zinc finger protein 644	Q9H582 [157-168]	S(8): 0.4; T(9): 99.6	Q9H582 1xPhospho [T165(99.6)]	1	0.71	0.01597	0.01	0.966726	0.69	0.0624788
SPDPFGAVAAQK	Q9Y3Q8	TSC22D4	TSC22 domain family protein 4	Q9Y3Q8 [279-290]	S(1): 100.0	Q9Y3Q8 1xPhospho [S279(100)]	1	1.31	0.00082244	0.74	0.0974064	0.56	0.0625175
TISLTDFLAEDGGTGGGSTYVSK	P23588	EIF4B	Eukaryotic translation initiation factor 4B	P23588 [14-36]	T(1): 99.1; S(3): 0.9; T(5): 0.1; T(14): 0.0; S(18): 0.0; T(19): 0.0; Y(20): 0.0; S(22): 0.0	P23588 1xPhospho [T14(99)]	2	0.89	0.0214734	-0.15	0.874539	1.04	0.0627148
LSEPKPIFFNLNIAAAKPTPPK	P18583	SON	Protein SON	P18583 [2145-2166]	S(2): 0.0; T(19): 100.0	P18583 1xPhospho [T2163(100)]	1	0.38	0.166985	-0.58	0.254247	0.95	0.0630058
SEYQWITSPSVK	Q5JTW2	CEP78	Centrosomal protein of 78 kDa	Q5JTW2 [318-329]	S(1): 0.0; Y(3): 0.0; T(7): 0.5; S(8): 99.0; S(10): 0.5	Q5JTW2 1xPhospho [S325(99)]	1	0.08	0.818331	0.81	0.0357067	-0.72	0.0631673
ILIVTQTPHYMR	Q6PKG0	LARP1	La-related protein 1	Q6PKG0 [643-654]	T(5): 0.0; T(7): 100.0; Y(10): 0.0	Q6PKG0 1xPhospho [T649(100)]	1	0.46	0.0308751	-0.1	0.750701	0.56	0.0632278
SLGSPLLHER	Q92844	TANK	TRAF family member-associated NF-kappa-B activator	Q92844 [126-135]	S(1): 4.9; S(4): 95.1	Q92844 1xPhospho [S129(95.1)]	1	0.25	0.30776	-0.76	0.163349	1.01	0.0632278
GYSSLDQSPDEKPLVALDTDSDDDFDMSR	Q8IW50	FAM219A	Protein FAM219A	Q8IW50 [95-123]	Y(2): 0.0; S(3): 0.0; S(4): 0.0; S(8): 0.0; T(19): 0.1; S(21): 99.9; S(28): 0.1	Q8IW50 1xPhospho [S115(99.4)]	2	-0.1	0.749845	0.67	0.0713066	-0.78	0.0632278
AENAEGQTPAIGPDGEPLDETSQMSDLPVK	P51532	SMARCA4	Transcription activator BRG1	P51532 [589-618]	T(8): 0.0; T(21): 66.7; S(22): 66.7; S(25): 66.7		1	-1.83	8.70184e-05	-0.97	0.00317607	-0.86	0.0634148
SPLELEPEAK	Q92466	DDB2	DNA damage-binding protein 2	Q92466 [26-35]	S(1): 100.0	Q92466 1xPhospho [S26(100)]	2	-0.17	0.414947	0.39	0.127769	-0.56	0.0635359
SPSDEGPGSMGDDGQLSPGVLVR	Q92918	MAP4K1	Mitogen-activated protein kinase kinase kinase kinase 1	Q92918 [405-427]	S(1): 0.0; S(3): 0.0; S(9): 0.0; S(17): 100.0	Q92918 1xPhospho [S421(100)]	3	-0.76	0.00331052	-0.15	0.440842	-0.61	0.0635359
AQLSVQTSPVPTPDPK	O43426	SYNJ1	Synaptojanin-1	O43426 [1338-1353]	S(4): 6.6; T(7): 6.6; S(8): 86.8; T(12): 0.0	O43426 1xPhospho [S1345(86.8)]	1	0.31	0.131069	-0.32	0.309241	0.62	0.0636663
SVAPAAPTSCDFSPGDLVWAK	P52701	MSH6	DNA mismatch repair protein Msh6	P52701 [79-99]	S(1): 96.1; T(8): 1.8; S(9): 1.8; S(13): 0.3	P52701 1xPhospho [S91(99.9)]	3	0.68	0.0574679	-0.43	0.539473	1.11	0.0637665
SLSVPAASTAKPPPLPR	P49815	TSC2	Tuberin	P49815 [1252-1268]	S(1): 1.1; S(3): 98.9; S(8): 0.0; T(9): 0.0	P49815 1xPhospho [S1254(98.9)]	1	0.5	0.0149708	0	0.995524	0.49	0.0637665
KAGLSEEDDSLVDVYYR	Q14690	PDCD11	Protein RRP5 homolog	Q14690 [1489-1505]	S(5): 100.0; S(10): 99.7; Y(15): 0.3; Y(16): 0.0	Q14690 2xPhospho [S1493(100); S1498(99.7)]	1	1.5	0.000389547	0.99	0.0312945	0.52	0.0641484
SPLLAGGSPPQPVVPAHK	Q8NFH5	NUP35	Nucleoporin NUP53	Q8NFH5 [66-83]	S(1): 0.0; S(8): 100.0	Q8NFH5 1xPhospho [S73(100)]	3	-0.77	0.00700037	-0.06	0.731558	-0.71	0.0645925
KLPCDTPGQGLTCSGEKR	Q9Y6Q9	NCOA3	Nuclear receptor coactivator 3	Q9Y6Q9 [19-36]	T(6): 0.0; T(12): 50.0; S(14): 50.0		1	0.97	0.00122804	0.46	0.152436	0.51	0.0645991
AGGSPAPGPETPAISPSKR	P33316	DUT	Deoxyuridine 5'-triphosphate nucleotidohydrolase, mitochondrial	P33316 [85-103]	S(4): 0.0; T(11): 0.0; S(15): 99.0; S(17): 1.0	P33316 1xPhospho [S99(99)]	1	-0.14	0.496415	0.34	0.110595	-0.47	0.0645991
RLSLPGLLSQVSPR	Q96Q42	ALS2	Alsin	Q96Q42 [481-494]	S(3): 0.0; S(9): 0.0; S(12): 100.0	Q96Q42 1xPhospho [S483(100)]	3	-1.15	0.00081824	-0.43	0.0929802	-0.72	0.0646198
RSNSEVEDVGPTSHNRK	Q13206	DDX10	Probable ATP-dependent RNA helicase DDX10	Q13206 [828-844]	S(2): 1.1; S(4): 98.9; T(12): 0.0; S(13): 0.0	Q13206 1xPhospho [S831(98.9)]	1	1.38	0.00421195	0.45	0.52497	0.93	0.0649706
VVDYSQFQESDDADEDYGRDSGPPTKK	Q9H1E3	NUCKS1	Nuclear ubiquitous casein and cyclin-dependent kinase substrate 1	Q9H1E3 [10-36]	Y(4): 2.7; S(5): 2.7; S(10): 94.5; Y(17): 0.6; S(21): 99.3; T(25): 0.1	Q9H1E3 2xPhospho [S19(94.5); S30(99.3)]	1	1.19	0.0055205	0.33	0.630585	0.86	0.0649706
QLLFEDTSLTFGTSSR	Q8WWQ0	PHIP	PH-interacting protein	Q8WWQ0 [1789-1804]	T(7): 8.9; S(8): 90.2; T(10): 1.0; T(13): 0.0; S(14): 0.0; S(15): 0.0	Q8WWQ0 1xPhospho [S1796(90.2)]	2	0.81	0.0278482	-0.19	0.79984	1.01	0.0649706
EVQSPEGMISLR	Q9H6R4	NOL6	Nucleolar protein 6	Q9H6R4 [808-819]	S(4): 100.0; S(10): 0.0	Q9H6R4 1xPhospho [S811(100)]	2	0.71	0.00530076	0.17	0.614366	0.54	0.0649706
HFPLDLRTSMDGK	Q01433	AMPD2	AMP deaminase 2	Q01433 [110-122]	T(8): 50.0; S(9): 50.0		2	0.13	0.602182	-0.82	0.09326	0.93	0.0649706
SNDSTEQNLSDGTPMPDSYPTTPSSTDAATSESK	Q7Z6Z7	HUWE1	E3 ubiquitin-protein ligase HUWE1	Q7Z6Z7 [2726-2759]	S(1): 13.2; S(4): 42.5; T(5): 42.5; S(10): 1.5; T(13): 0.2; S(18): 0.0; Y(19): 0.0; T(21): 0.0; T(22): 0.0; S(24): 0.0; S(25): 0.0; T(26): 0.0; T(30): 0.0; S(31): 0.0; S(33): 0.0		1	-0.22	0.315863	0.35	0.164053	-0.57	0.0649706
QWEVPDTASECDSLNSSIGR	Q9P246	STIM2	Stromal interaction molecule 2	Q9P246 [587-606]	T(7): 0.0; S(9): 0.0; S(13): 0.0; S(16): 1.0; S(17): 99.0	Q9P246 1xPhospho [S603(99)]	2	0.67	0.0354373	1.2	0.00586581	-0.53	0.0650436
MRKETPPPLVPPAAR	Q9BQA1	WDR77	Methylosome protein 50	Q9BQA1 [1-15]	T(5): 100.0	Q9BQA1 1xPhospho [T5(100)]	1	0.37	0.124546	-0.44	0.330323	0.81	0.0650436
SGPKPFSAPKPQTSPSPK	Q01518	CAP1	Adenylyl cyclase-associated protein 1	Q01518 [295-312]	S(1): 0.0; S(7): 0.0; T(13): 93.8; S(14): 6.2; S(16): 0.0	Q01518 1xPhospho [S308(89.9)]	7	-1.71	0.00122804	-0.48	0.152136	-1.23	0.0652031
ASTGPPLIK	Q9HB19	PLEKHA2	Pleckstrin homology domain-containing family A member 2	Q9HB19 [193-201]	S(2): 50.0; T(3): 50.0		2	2.34	7.70802e-05	2.67	0.000225858	-0.32	0.0652701
IISTTASKTETPIVSK	O95292	VAPB	Vesicle-associated membrane protein-associated protein B/C	O95292 [140-155]	S(3): 0.0; T(4): 0.0; T(5): 0.0; S(7): 0.0; T(9): 0.7; T(11): 99.3; S(15): 0.0	O95292 1xPhospho [T150(99.3)]	1	1.67	0.0110383	0.23	0.901169	1.44	0.0652701
SGSALLQSQSSTEDPKDEPAELKPDSEDLSSQSSASK	Q5VTR2	RNF20	E3 ubiquitin-protein ligase BRE1A	Q5VTR2 [515-551]	S(1): 46.3; S(3): 46.3; S(8): 4.1; S(10): 1.3; S(11): 0.5; T(12): 1.3; S(26): 0.2; S(30): 0.1; S(31): 0.0; S(33): 0.0; S(34): 0.0; S(36): 0.0		1	0.8	0.00456459	0.22	0.550081	0.58	0.0652701
TPSTVTLNNNSAPANR	Q9ULH0	KIDINS220	Kinase D-interacting substrate of 220 kDa	Q9ULH0 [1679-1694]	T(1): 33.3; S(3): 33.3; T(4): 33.3; T(6): 0.2; S(11): 0.0		2	0.3	0.23858	-0.59	0.205579	0.9	0.0652701
QGYACPYYHNSKDR	Q9C0B0	UNK	RING finger protein unkempt homolog	Q9C0B0 [230-243]	Y(3): 0.0; Y(7): 0.0; Y(8): 0.0; S(11): 100.0	Q9C0B0 1xPhospho [S240(100)]	1	0.22	0.393772	0.77	0.0204457	-0.55	0.0652701
SISREPSPALGPNLDGSGLLPR	Q9BRZ2	TRIM56	E3 ubiquitin-protein ligase TRIM56	Q9BRZ2 [469-490]	S(1): 14.8; S(3): 85.7; S(7): 99.5; S(17): 0.0	Q9BRZ2 2xPhospho [S471(81.8); S475(82.8)]	3	-0.36	0.100654	0.17	0.38309	-0.54	0.0652701
GILHLSPDVYQEMEASR	Q9NUL3	STAU2	Double-stranded RNA-binding protein Staufen homolog 2	Q9NUL3 [411-427]	S(6): 100.0; Y(10): 0.0; S(16): 0.0	Q9NUL3 1xPhospho [S416(100)]	1	0.57	0.0753413	-0.43	0.470148	1.01	0.0654198
DGSTEDTASSLCGEEDTEDEELEAAASHLNK	Q92994	BRF1	Transcription factor IIIB 90 kDa subunit	Q92994 [349-379]	S(3): 0.0; T(4): 0.0; T(7): 0.0; S(9): 0.0; S(10): 0.0; T(17): 100.0; S(27): 0.0	Q92994 1xPhospho [T365(100)]	2	-0.13	0.533809	0.41	0.105444	-0.54	0.0654198
IAFDAESEPNNSSGSMEK	Q92556	ELMO1	Engulfment and cell motility protein 1	Q92556 [330-347]	S(7): 0.0; S(12): 0.0; S(13): 6.4; S(15): 93.6	Q92556 1xPhospho [S344(93.6)]	3	0.49	0.0278943	0.91	0.00519861	-0.42	0.0656292
RHSEVETDSK	Q9NX58	LYAR	Cell growth-regulating nucleolar protein	Q9NX58 [274-283]	S(3): 100.0; T(7): 0.0; S(9): 0.0	Q9NX58 1xPhospho [S276(100)]	1	2.16	0.00125423	1.27	0.153566	0.88	0.0658586
ALSSGGSITSPPLSPALPK	Q6Y7W6	GIGYF2	PERQ amino acid-rich with GYF domain-containing protein 2	Q6Y7W6 [17-35]	S(3): 0.0; S(4): 0.0; S(7): 1.0; T(9): 99.1; S(10): 99.9; S(14): 0.0	Q6Y7W6 2xPhospho [S26(99.8); S30(100)]	3	1.72	0.000967048	0.99	0.113176	0.73	0.0658586
SANAFLTPSYTWTPLKTEVDESQATK	Q15398	DLGAP5	Disks large-associated protein 5	Q15398 [332-357]	S(1): 0.0; T(7): 0.0; S(9): 0.1; Y(10): 0.1; T(11): 2.6; T(13): 97.1; T(17): 0.0; S(22): 0.1; T(25): 0.0	Q15398 1xPhospho [T344(97.1)]	1	0.56	0.0776428	-0.44	0.46257	1.01	0.0659218
KVEEDELLEKSPLQLGNEPLQR	Q9ULD4	BRPF3	Bromodomain and PHD finger-containing protein 3	Q9ULD4 [876-897]	S(11): 100.0	Q9ULD4 1xPhospho [S886(100)]	1	1.04	0.00499817	0.28	0.579143	0.77	0.0659415
TPGFSVQSISDFEK	Q9NY61	AATF	Protein AATF	Q9NY61 [146-159]	T(1): 0.0; S(5): 0.0; S(8): 0.0; S(10): 100.0	Q9NY61 1xPhospho [S155(100)]	2	0.58	0.0450943	-0.22	0.6419	0.81	0.0659415
ILALASFEVEK	Q8WZA0	LZIC	Protein LZIC	Q8WZA0 [177-187]	S(6): 100.0	Q8WZA0 1xPhospho [S182(100)]	1	1.35	0.00547519	0.41	0.61543	0.94	0.0659868
KVQFDGTNSAFK	Q8WWK9	CKAP2	Cytoskeleton-associated protein 2	Q8WWK9 [606-617]	T(7): 0.0; S(9): 100.0	Q8WWK9 1xPhospho [S614(100)]	1	1.3	0.0130304	0.08	0.945136	1.21	0.0659868
TSSPRSPPSSSEIFTPAHEENVR	C9JLW8	FAM195B	Protein FAM195B	C9JLW8 [16-38]	T(1): 3.8; S(2): 32.1; S(3): 32.1; S(6): 32.1; S(9): 0.1; S(10): 0.0; S(11): 0.0; T(15): 0.0		6	0.12	0.757965	0.82	0.0347619	-0.7	0.0659868
LGSQPIRASNPDLR	Q9UKE5	TNIK	TRAF2 and NCK-interacting protein kinase	Q9UKE5 [699-712]	S(3): 0.0; S(9): 100.0	Q9UKE5 1xPhospho [S707(100)]	1	0.02	0.941889	0.55	0.0456608	-0.53	0.0659868
LSSTDDGYIDLQFKK	Q96A57	TMEM230	Transmembrane protein 230	Q96A57 [22-36]	S(2): 4.0; S(3): 4.0; T(4): 92.0; Y(8): 0.0	Q96A57 1xPhospho [T25(92)]	3	0.67	0.0374276	-0.16	0.712485	0.83	0.0663797
AQPSVSLGAPYR	Q96PK6	RBM14	RNA-binding protein 14	Q96PK6 [275-286]	S(4): 0.8; S(6): 99.2; Y(11): 0.0	Q96PK6 1xPhospho [S280(99.2)]	1	1.67	0.00146629	0.88	0.179132	0.79	0.0666783
IFTTPLTPSQYYSGSK	P49454	CENPF	Centromere protein F	P49454 [148-163]	T(3): 0.0; T(4): 0.0; T(7): 100.0; S(9): 0.0; Y(11): 0.0; Y(12): 0.0; S(13): 0.0; S(15): 0.0	P49454 1xPhospho [T154(100)]	1	0.62	0.0572778	-0.35	0.565577	0.98	0.0666783
LHLSPVGIPGSAR	Q9H7P9	PLEKHG2	Pleckstrin homology domain-containing family G member 2	Q9H7P9 [87-99]	S(4): 100.0; S(11): 0.0	Q9H7P9 1xPhospho [S90(100)]	1	1.28	0.00177709	0.64	0.222296	0.64	0.0673162
LLVAGGVPLHPQSPLATK	Q9UKV0	HDAC9	Histone deacetylase 9	Q9UKV0 [410-427]	S(13): 100.0; T(17): 0.0	Q9UKV0 1xPhospho [S422(100)]	1	0.98	0.002851	0.36	0.361124	0.61	0.0673202
QSSIFGGADVGFSGGIPSPDK	Q9P2Y5	UVRAG	UV radiation resistance-associated gene protein	Q9P2Y5 [481-501]	S(2): 0.0; S(3): 0.0; S(13): 0.0; S(18): 100.0	Q9P2Y5 1xPhospho [S498(100)]	1	0	0.988071	0.45	0.0519633	-0.45	0.0673202
EKEPSYPMPVQETQAPESPGENSEQALQTLSPR	Q7Z434	MAVS	Mitochondrial antiviral-signaling protein	Q7Z434 [135-167]	S(5): 0.0; Y(6): 0.0; T(13): 0.0; S(18): 0.0; S(23): 0.0; T(29): 13.3; S(31): 86.7	Q7Z434 1xPhospho [S152(85.7)]	4	-0.62	0.00688753	-0.09	0.699293	-0.53	0.0673202
RGSMEQAPAVALPPTHK	Q8WUF5	PPP1R13L	RelA-associated inhibitor	Q8WUF5 [524-540]	S(3): 100.0; T(15): 0.0	Q8WUF5 1xPhospho [S526(100)]	1	0.32	0.214595	-0.72	0.232982	1.05	0.069161
SSSLVDIREEETEGGSR	Q96Q42	ALS2	Alsin	Q96Q42 [464-480]	S(1): 7.8; S(2): 45.3; S(3): 45.3; T(12): 1.5; S(16): 0.1		2	-0.3	0.143486	0.19	0.315962	-0.5	0.069161
ETGGILGEGTPK	Q96S66	CLCC1	Chloride channel CLIC-like protein 1	Q96S66 [473-484]	T(2): 0.0; T(10): 100.0	Q96S66 1xPhospho [T482(100)]	1	-0.39	0.0749245	-1.39	0.00801574	1	0.069161
GSDIDNPTLTVMDISPPSR	Q9Y2U5	MAP3K2	Mitogen-activated protein kinase kinase kinase 2	Q9Y2U5 [330-348]	S(2): 0.0; T(8): 0.0; T(10): 0.0; S(15): 98.7; S(18): 1.4	Q9Y2U5 1xPhospho [S344(98.8)]	2	1.01	0.00422735	0.35	0.497877	0.67	0.0692221
LLSPVVPQISAPQSNK	Q8N1F7	NUP93	Nuclear pore complex protein Nup93	Q8N1F7 [645-660]	S(3): 100.0; S(10): 0.0; S(14): 0.0	Q8N1F7 1xPhospho [S647(100)]	1	0.17	0.446214	-0.55	0.131091	0.72	0.0692221
TSLITEEEDSTSEVLDEELK	Q9Y6X4	FAM169A	Soluble lamin-associated protein of 75 kDa	Q9Y6X4 [438-457]	T(1): 0.0; S(2): 0.0; T(5): 0.0; S(10): 0.0; T(11): 6.0; S(12): 94.0	Q9Y6X4 1xPhospho [S449(94)]	1	-1.16	0.00715392	-0.21	0.706818	-0.95	0.0692221
EESLVEELSPASEK	Q9BXK5	BCL2L13	Bcl-2-like protein 13	Q9BXK5 [418-431]	S(3): 100.0; S(9): 0.0; S(12): 0.0	Q9BXK5 1xPhospho [S420(100)]	4	0.91	0.00562927	1.34	0.00279324	-0.43	0.0693563
TQPTSLPKQPAPTTIGGLNK	P27816	MAP4	Microtubule-associated protein 4	P27816 [719-738]	T(1): 2.0; T(4): 12.6; S(5): 84.7; T(13): 0.4; T(14): 0.4	P27816 1xPhospho [S723(84.7)]	1	1.29	0.0148802	0.06	0.968456	1.23	0.0696529
GITEECLKQPSLEQK	Q9UKV3	ACIN1	Apoptotic chromatin condensation inducer in the nucleus	Q9UKV3 [541-555]	T(3): 0.0; S(11): 100.0	Q9UKV3 1xPhospho [S551(100)]	1	1.24	0.000942098	0.69	0.103185	0.55	0.0696948
SRTPSLPTPPTREPK	P10636	MAPT	Microtubule-associated protein tau	P10636 [527-541]	S(1): 10.2; T(3): 89.8; S(5): 0.0; T(8): 0.0; T(11): 0.0	P10636 1xPhospho [T529(89.8)]	1	0.64	0.0333188	-0.19	0.770948	0.83	0.0702114
YLQEEENSPPSDSTIPGIQK	Q5VV42	CDKAL1	Threonylcarbamoyladenosine tRNA methylthiotransferase	Q5VV42 [46-65]	Y(1): 91.0; S(8): 9.0; S(11): 0.0; S(13): 0.0; T(14): 0.0	Q5VV42 1xPhospho [Y46(91)]	1	1.41	0.00899672	0.27	0.797254	1.14	0.0703338
NPLEELRPSPR	Q12815	TROAP	Tastin	Q12815 [90-100]	S(9): 100.0	Q12815 1xPhospho [S98(100)]	1	1.08	0.0359642	-0.31	0.750511	1.4	0.0703338
QWEVPDTASECDSLNSSIGRK	Q9P246	STIM2	Stromal interaction molecule 2	Q9P246 [587-607]	T(7): 0.0; S(9): 0.0; S(13): 0.0; S(16): 50.0; S(17): 50.0		2	0.54	0.165111	1.24	0.0122098	-0.7	0.0706426
AADISLDNLVEGK	Q12888	TP53BP1	Tumor suppressor p53-binding protein 1	Q12888 [1614-1626]	S(5): 100.0	Q12888 1xPhospho [S1618(100)]	1	1.5	0.0019684	0.74	0.236414	0.76	0.0712715
IGLPHSIK	Q14498	RBM39	RNA-binding protein 39	Q14498 [112-119]	S(6): 100.0	Q14498 1xPhospho [S117(100)]	1	1.08	0.00501334	0.35	0.550621	0.73	0.0712715
FVPAENDSILMNPAQDGEVQLSQNDDK	Q12888	TP53BP1	Tumor suppressor p53-binding protein 1	Q12888 [559-585]	S(8): 0.0; S(22): 100.0	Q12888 1xPhospho [S580(100)]	1	0.53	0.0214154	-0.03	0.927303	0.57	0.0712715
APSYSGLSMVSGVK	Q9UBP0	SPAST	Spastin	Q9UBP0 [266-279]	S(3): 33.3; Y(4): 33.3; S(5): 33.3; S(8): 0.0; S(11): 0.0		5	0.38	0.145992	-0.45	0.321264	0.83	0.0713062
TSPLVSQNNEQGSTLR	Q15652	JMJD1C	Probable JmjC domain-containing histone demethylation protein 2C	Q15652 [2052-2067]	T(1): 50.0; S(2): 50.0; S(6): 0.0; S(13): 0.0; T(14): 0.0		1	-0.31	0.173649	0.26	0.282992	-0.58	0.071332
DSSEATGWEEPSPPSIR	Q9HCJ0	TNRC6C	Trinucleotide repeat-containing gene 6C protein	Q9HCJ0 [703-719]	S(2): 0.0; S(3): 0.0; T(6): 0.1; S(12): 97.9; S(15): 2.1	Q9HCJ0 1xPhospho [S714(97.8)]	2	-0.44	0.0430337	0.08	0.693731	-0.52	0.071332
APTSVTPVAPGK	Q8IZD4	DCP1B	mRNA-decapping enzyme 1B	Q8IZD4 [387-398]	T(3): 33.3; S(4): 33.3; T(6): 33.3		2	1.63	0.00336919	0.67	0.401973	0.97	0.0713601
PAVVLPSAAPAGAAAPPSGSR	P19419	ELK1	ETS domain-containing protein Elk-1	P19419 [177-197]	S(7): 0.0; S(18): 1.0; S(20): 99.0	P19419 1xPhospho [S194(90.3)]	2	-0.79	0.0126414	0.07	0.908126	-0.86	0.0714929
TVSPDEITTRPMDK	Q8NG31	CASC5	Protein CASC5	Q8NG31 [954-967]	T(1): 1.0; S(3): 99.0; T(8): 0.0; T(9): 0.0	Q8NG31 1xPhospho [S956(99)]	1	0.48	0.0446358	-0.17	0.682887	0.65	0.0715462
SAGSLRPSQSLDCCHR	Q8IV53	DENND1C	DENN domain-containing protein 1C	Q8IV53 [573-588]	S(1): 0.0; S(4): 0.0; S(8): 0.0; S(10): 100.0	Q8IV53 1xPhospho [S582(100)]	1	1.54	0.0278453	-0.37	0.849007	1.91	0.0716626
SSRDPPSSPSSLSSPIQESTAPELPSETQETPGPALCSPLR	Q16512	PKN1	Serine/threonine-protein kinase N1	Q16512 [566-606]	S(1): 0.3; S(2): 0.3; S(7): 6.3; S(8): 6.3; S(10): 6.3; S(11): 6.3; S(13): 6.3; S(14): 6.3; S(19): 30.9; T(20): 30.9; S(26): 0.0; T(28): 0.0; T(31): 0.0; S(38): 0.0		1	0.47	0.0658517	0.96	0.00769101	-0.49	0.0716626
NSSPGEASLLEK	Q76FK4	NOL8	Nucleolar protein 8	Q76FK4 [1097-1108]	S(2): 95.5; S(3): 4.5; S(8): 0.0	Q76FK4 1xPhospho [S1098(96.3)]	5	-0.2	0.392455	0.38	0.151073	-0.57	0.0716626
EDVEVVGGSDGEGAIGLSSDPK	Q8NHZ8	CDC26	Anaphase-promoting complex subunit CDC26	Q8NHZ8 [34-55]	S(9): 100.0; S(18): 0.0; S(19): 0.0	Q8NHZ8 1xPhospho [S42(100)]	1	-0.03	0.896106	0.51	0.0643938	-0.54	0.0716835
EKLPSPSAALSEFVEGLR	Q8IUG5	MYO18B	Unconventional myosin-XVIIIb	Q8IUG5 [2241-2258]	S(5): 91.4; S(7): 8.6; S(11): 0.0	Q8IUG5 1xPhospho [S2245(91.4)]	1	0.91	0.00189095	0.43	0.22249	0.5	0.0720244
WWAASPAPAR	Q8NC56	LEMD2	LEM domain-containing protein 2	Q8NC56 [162-171]	S(5): 100.0	Q8NC56 1xPhospho [S166(100)]	1	0.59	0.0179326	0	0.988265	0.59	0.0723763
KDDNDEEEEDIDFFEDIDSDEDEGGLFGSK	O00566	MPHOSPH10	U3 small nucleolar ribonucleoprotein protein MPP10	O00566 [224-253]	S(19): 100.0; S(29): 0.0	O00566 1xPhospho [S242(100)]	2	-0.39	0.329547	0.54	0.17621	-0.93	0.0726636
DQSPFSK	Q13427	PPIG	Peptidyl-prolyl cis-trans isomerase G	Q13427 [685-691]	S(3): 100.0; S(6): 0.0	Q13427 1xPhospho [S687(100)]	1	-0.25	0.293714	0.29	0.193183	-0.55	0.0726731
VASSPVMVSNPATR	P51610	HCFC1	Host cell factor 1	P51610 [595-608]	S(3): 7.9; S(4): 92.1; S(9): 0.0; T(13): 0.0	P51610 1xPhospho [S598(92.1)]	2	1.05	0.00251204	0.45	0.298915	0.61	0.0731738
LEEDRQSLDLSSEWWDDK	Q9HCU9	BRMS1	Breast cancer metastasis-suppressor 1	Q9HCU9 [167-184]	S(7): 100.0; S(11): 0.0; S(12): 0.0	Q9HCU9 1xPhospho [S173(100)]	1	-0.93	0.00639104	-0.17	0.633353	-0.76	0.0731738
KNYQSQADIPIRSPFGIVK	Q14966	ZNF638	Zinc finger protein 638	Q14966 [371-389]	Y(3): 0.0; S(5): 0.0; S(13): 100.0	Q14966 1xPhospho [S383(100)]	1	0.96	0.0128532	0.09	0.902654	0.88	0.0736574
DRSILTLSK	Q8IY92	SLX4	Structure-specific endonuclease subunit SLX4	Q8IY92 [1085-1093]	S(3): 100.0; T(6): 0.0; S(8): 0.0	Q8IY92 1xPhospho [S1087(100)]	1	2.35	7.95692e-05	1.99	0.00279238	0.37	0.073767
TGSGSPFAGNSPAREGEQDAASLK	Q9UPT8	ZC3H4	Zinc finger CCCH domain-containing protein 4	Q9UPT8 [1265-1288]	T(1): 1.6; S(3): 11.4; S(5): 87.0; S(11): 100.0; S(22): 0.0	Q9UPT8 2xPhospho [S1269(87); S1275(100)]	3	-0.43	0.0748471	0.12	0.5204	-0.55	0.073767
TYSAPAINAIQGGSFESPK	Q9H4L5	OSBPL3	Oxysterol-binding protein-related protein 3	Q9H4L5 [249-267]	T(1): 90.8; Y(2): 8.4; S(3): 0.8; S(14): 0.0; S(17): 0.0	Q9H4L5 1xPhospho [T249(90.8)]	1	-1.21	0.000686675	-0.48	0.0634123	-0.72	0.073767
RFSDFLGLHSK	O60749	SNX2	Sorting nexin-2	O60749 [183-193]	S(3): 100.0; S(10): 0.0	O60749 1xPhospho [S185(100)]	1	0.69	0.00978151	0.1	0.80456	0.59	0.0739022
SVPPATPATPTSPATVDAAVPGAGK	Q6NYC8	PPP1R18	Phostensin	Q6NYC8 [479-503]	S(1): 9.6; T(6): 23.3; T(9): 33.9; T(11): 27.4; S(12): 52.9; T(15): 52.9		1	0.27	0.300728	-0.63	0.193183	0.9	0.0741206
RGSNVALMLDVR	P35236	PTPN7	Tyrosine-protein phosphatase non-receptor type 7	P35236 [42-53]	S(3): 100.0	P35236 1xPhospho [S44(100)]	2	0.29	0.133978	-0.32	0.355288	0.6	0.0743795
NTFTAWSDEESDYEIDDRDVNK	Q6PKG0	LARP1	La-related protein 1	Q6PKG0 [621-642]	T(2): 35.6; T(4): 35.6; S(7): 39.7; S(11): 89.0; Y(13): 0.1	Q6PKG0 2xPhospho [S631(89); S/T/Y]	1	-0.55	0.215833	0.49	0.251197	-1.04	0.0747869
LQQESTFLFHGNKTEDTPDKK	Q9UKX7	NUP50	Nuclear pore complex protein Nup50	Q9UKX7 [230-250]	S(5): 0.0; T(6): 0.0; T(14): 85.0; T(17): 15.0	Q9UKX7 1xPhospho [T243(85)]	2	1.74	0.0128535	0.25	0.89606	1.5	0.0749681
SMPNLAR	Q8ND83	SLAIN1	SLAIN motif-containing protein 1	Q8ND83 [403-409]	S(1): 100.0	Q8ND83 1xPhospho [S403(100)]	1	0.37	0.125176	-0.33	0.374179	0.7	0.0750321
KDDVSPVMQFSSK	Q8IZE3	SCYL3	Protein-associating with the carboxyl-terminal domain of ezrin	Q8IZE3 [703-715]	S(5): 100.0; S(11): 0.0; S(12): 0.0	Q8IZE3 1xPhospho [S707(100)]	1	0.34	0.0962694	-0.3	0.450013	0.64	0.0752823
KEGVILTNESAASTGQPDNDVTEGQR	Q08J23	NSUN2	tRNA (cytosine(34)-C(5))-methyltransferase	Q08J23 [712-737]	T(7): 0.1; S(10): 0.0; S(13): 50.0; T(14): 50.0; T(22): 0.0		2	-0.08	0.75005	0.52	0.0853722	-0.6	0.0752823
NSSTPGLQVPVSPTVPIQNQK	Q03164	KMT2A; MLL	Histone-lysine N-methyltransferase 2A	Q03164 [3025-3045]	S(2): 5.0; S(3): 47.5; T(4): 47.5; S(12): 0.0; T(14): 0.0		9	-0.66	0.037127	0.07	0.766369	-0.73	0.0752823
ENIIPLLVTSNSDQFLTTPDGDEKDITQDNSELK	Q6NXT6	TAPT1	Transmembrane anterior posterior transformation protein 1 homolog	Q6NXT6 [512-545]	T(9): 2.6; S(10): 48.7; S(12): 48.7; T(17): 0.0; T(18): 0.0; T(27): 0.0; S(31): 0.0		2	0.35	0.266376	-0.77	0.215655	1.12	0.0753107
TAPPALPTGYDSEEEEESRPMSYDEK	P25440	BRD2	Bromodomain-containing protein 2	P25440 [622-647]	T(1): 0.0; T(8): 11.1; Y(10): 11.1; S(12): 77.7; S(18): 0.0; S(22): 0.0; Y(23): 0.0	P25440 1xPhospho [S633(77.7)]	3	-0.59	0.00873806	-0.07	0.754997	-0.53	0.0753107
GGGLGSPGEGGALPR	Q7Z7A3	CTU1	Cytoplasmic tRNA 2-thiolation protein 1	Q7Z7A3 [195-209]	S(6): 100.0	Q7Z7A3 1xPhospho [S200(100)]	1	0.95	0.00631531	0.24	0.610461	0.71	0.076263
SSAPFSPPSGPPEK	Q5TZA2	CROCC	Rootletin	Q5TZA2 [2004-2017]	S(1): 0.0; S(2): 0.5; S(6): 99.5; S(9): 0.0	Q5TZA2 1xPhospho [S2009(99.5)]	1	-0.43	0.0772995	0.16	0.522032	-0.59	0.076263
GGAASPAATASDPAGPPPLPLPGPPPLAPTATAGTLAASEGR	Q68DK7	MSL1	Male-specific lethal 1 homolog	Q68DK7 [157-198]	S(5): 99.0; T(9): 0.5; S(11): 0.5; T(30): 0.0; T(32): 0.0; T(35): 0.0; S(39): 0.0	Q68DK7 1xPhospho [S161(99)]	3	-0.62	0.015798	-0.05	0.954222	-0.57	0.076263
REREESEDELEEANGNNPIDIEVDQNK	Q9UKL0	RCOR1	REST corepressor 1	Q9UKL0 [252-278]	S(6): 100.0	Q9UKL0 1xPhospho [S257(100)]	6	-0.08	0.723744	0.46	0.0902589	-0.54	0.0762998
HSPSPPPPTPTESR	Q92922	SMARCC1	SWI/SNF complex subunit SMARCC1	Q92922 [327-340]	S(2): 0.4; S(4): 99.6; T(9): 0.0; T(11): 0.0; S(13): 0.0		3	0.19	0.459245	0.71	0.0254795	-0.53	0.0763288
SMIFSPASK	Q9P246	STIM2	Stromal interaction molecule 2	Q9P246 [661-669]	S(1): 100.0; S(5): 0.0; S(8): 0.0	Q9P246 1xPhospho [S661(100)]	1	-0.57	0.138214	0.3	0.357562	-0.87	0.076609
SLSEQPVMDTATATEQAK	P18615	NELFE; RDBP	Negative elongation factor E	P18615 [49-66]	S(1): 99.1; S(3): 0.9; T(10): 0.0; T(12): 0.0; T(14): 0.0	P18615 1xPhospho [S49(99.1)]	8	1	0.0055017	0.32	0.553643	0.68	0.0766956
ILESITVSSLMATPQDPK	Q9NQS7	INCENP	Inner centromere protein	Q9NQS7 [227-244]	S(4): 0.0; T(6): 0.0; S(8): 0.0; S(9): 0.0; T(13): 100.0	Q9NQS7 1xPhospho [T239(100)]	2	0.89	0.0174027	0.03	0.982872	0.86	0.0766956
KSMSEDGGLQESNPCADDFVSASTADVSHTNLGTIR	Q8NBF6	AVL9	Late secretory pathway protein AVL9 homolog	Q8NBF6 [243-278]	S(2): 97.0; S(4): 3.0; S(12): 0.0; S(21): 0.0; S(23): 0.0; T(24): 0.0; S(28): 0.0; T(30): 0.0; T(34): 0.0	Q8NBF6 1xPhospho [S244(97)]	1	-0.13	0.585992	0.4	0.112671	-0.53	0.0766956
SMIFSPASK	Q9P246	STIM2	Stromal interaction molecule 2	Q9P246 [661-669]	S(1): 100.0; S(5): 0.0; S(8): 0.0	Q9P246 1xPhospho [S661(100)]	1	-0.14	0.508508	0.35	0.129047	-0.49	0.0766956
TSQVGAASAPAKESPRK	Q13428	TCOF1	Treacle protein	Q13428 [368-384]	T(1): 0.0; S(2): 0.0; S(8): 0.0; S(14): 99.9	Q13428 1xPhospho [S381(100)]	2	-0.05	0.897606	0.61	0.0686947	-0.64	0.0768039
DINTFLGTPVQK	P46013	MKI67	Antigen KI-67	P46013 [1794-1805]	T(4): 0.0; T(8): 100.0	P46013 1xPhospho [T1801(100)]	1	1	0.0227683	-0.04	0.941744	1.04	0.0769761
DRPASGSPFQLFLSK	Q96T88	UHRF1	E3 ubiquitin-protein ligase UHRF1	Q96T88 [703-717]	S(5): 100.0; S(7): 0.0; S(14): 0.0	Q96T88 1xPhospho [S707(100)]	3	0.41	0.0764251	-0.24	0.534149	0.64	0.0776201
SNVSSPATPTASSSSSTTPTRK	Q12888	TP53BP1	Tumor suppressor p53-binding protein 1	Q12888 [1631-1652]	S(1): 0.0; S(4): 0.0; S(5): 0.0; T(8): 0.0; T(10): 0.0; S(12): 0.0; S(13): 0.0; S(14): 0.0; S(15): 0.1; S(16): 0.9; T(17): 8.6; T(18): 90.4; T(20): 0.1	Q12888 1xPhospho [T1648(90.4)]	3	0.32	0.214275	0.86	0.0155136	-0.54	0.0779676
GLTLAPGLSPARPLFGSDFEKEK	Q8IU81	IRF2BP1	Interferon regulatory factor 2-binding protein 1	Q8IU81 [178-200]	T(3): 1.9; S(9): 98.1; S(17): 0.0	Q8IU81 1xPhospho [S186(98.1)]	1	0.27	0.227774	-0.44	0.251809	0.71	0.0779676
VDLGQNGEEKSPPNASHPPK	Q6JBY9	RCSD1	CapZ-interacting protein	Q6JBY9 [58-77]	S(11): 50.0; S(16): 50.0		2	1.3	0.000265558	0.92	0.0158877	0.38	0.0786212
LEDAESSNPNLQSLLSTDALPSASK	Q9Y294	ASF1A	Histone chaperone ASF1A	Q9Y294 [160-184]	S(6): 0.0; S(7): 0.0; S(13): 0.0; S(16): 50.0; T(17): 50.0; S(22): 0.0; S(24): 0.0		2	0.5	0.0637431	-0.2	0.60153	0.72	0.0790636
LAESLLALSQQEELADLPK	Q9BVJ6	UTP14A	U3 small nucleolar RNA-associated protein 14 homolog A	Q9BVJ6 [6-24]	S(4): 0.0; S(9): 100.0	Q9BVJ6 1xPhospho [S14(100)]	1	0.67	0.0167932	0.03	0.963092	0.64	0.0793836
LNTVASPKDCQELASISVGSGSR	Q96T58	SPEN	Msx2-interacting protein	Q96T58 [1057-1079]	T(3): 0.1; S(6): 99.9; S(15): 0.0; S(17): 0.0; S(20): 0.0; S(22): 0.0	Q96T58 1xPhospho [S1062(99.9)]	1	-0.56	0.0601429	0.14	0.621632	-0.7	0.0794001
SQIDVALSQDSTYQGER	Q92900	UPF1	Regulator of nonsense transcripts 1	Q92900 [1100-1116]	S(1): 0.0; S(8): 99.8; S(11): 8.9; T(12): 8.8; Y(13): 82.5	Q92900 2xPhospho [S1107(99.8); Y1112(82.5)]	1	-0.21	0.341848	0.36	0.185226	-0.57	0.079474
ANLQQAIVTPLKPVDNTYYK	Q9ULW0	TPX2	Targeting protein for Xklp2	Q9ULW0 [64-83]	T(9): 100.0; T(17): 0.0; Y(18): 0.0; Y(19): 0.0	Q9ULW0 1xPhospho [T72(100)]	1	1	0.0173485	0.05	0.96955	0.95	0.079543
TLSSPSNRPSGETSVPPPPAVGR	Q8WWM7	ATXN2L	Ataxin-2-like protein	Q8WWM7 [421-443]	T(1): 0.0; S(3): 11.3; S(4): 86.8; S(6): 0.2; S(10): 1.6; T(13): 0.0; S(14): 0.0	Q8WWM7 1xPhospho [S424(86.8)]	4	1.5	0.00481761	0.55	0.48974	0.94	0.0797763
TGSSPTQGIVNK	Q9UPT6	MAPK8IP3	C-Jun-amino-terminal kinase-interacting protein 3	Q9UPT6 [362-373]	T(1): 1.9; S(3): 32.7; S(4): 32.7; T(6): 32.7		2	0.73	0.0279164	1.24	0.00589212	-0.5	0.0800089
GLSEDTTEETLKESFDGSVR	P19338	NCL	Nucleolin	P19338 [578-597]	S(3): 76.0; T(6): 12.0; T(7): 12.0; T(10): 0.0; S(14): 0.0; S(18): 0.0	P19338 1xPhospho [S580(76)]	1	1.39	0.00493337	0.5	0.496625	0.89	0.0802186
NETGLLSSIKK	Q05D32	CTDSPL2	CTD small phosphatase-like protein 2	Q05D32 [44-54]	T(3): 0.0; S(7): 0.5; S(8): 99.5	Q05D32 1xPhospho [S51(99.5)]	1	1.39	0.00890792	0.34	0.7365	1.05	0.0802186
SSRPDTLLSPEQPVCPAGGSGGPPSSASPEVEAGPQGCATEPR	P78559	MAP1A	Microtubule-associated protein 1A	P78559 [2400-2442]	S(1): 0.0; S(2): 0.0; T(6): 0.0; S(9): 0.0; S(20): 0.2; S(25): 33.3; S(26): 33.3; S(28): 33.3; T(40): 0.0		2	-1.09	0.00774427	-0.14	0.675979	-0.96	0.0803264
NEETPAAPTPAGATGGSSAWLDSSSENR	Q7Z434	MAVS	Mitochondrial antiviral-signaling protein	Q7Z434 [385-412]	T(4): 0.0; T(9): 0.0; T(14): 12.9; S(17): 74.2; S(18): 12.9; S(23): 0.0; S(24): 0.0; S(25): 0.0		2	-1.7	0.000694254	-0.61	0.05968	-1.09	0.080549
FVDKYSISLSPPEQQK	Q15057	ACAP2	Arf-GAP with coiled-coil, ANK repeat and PH domain-containing protein 2	Q15057 [512-527]	Y(5): 0.0; S(6): 0.0; S(8): 0.1; S(10): 99.9	Q15057 1xPhospho [S521(100)]	2	-1.36	0.000148455	-0.73	0.00656717	-0.63	0.0808753
GVLHTFSPSPK	Q86YP4	GATAD2A	Transcriptional repressor p66-alpha	Q86YP4 [540-550]	T(5): 0.0; S(7): 100.0; S(9): 100.0	Q86YP4 2xPhospho [S546(100); S548(100)]	1	2.12	0.006042	0.83	0.566141	1.3	0.0809729
RSSPKGPPLPAENK	Q9BYV8	CEP41	Centrosomal protein of 41 kDa	Q9BYV8 [286-299]	S(2): 94.2; S(3): 5.8	Q9BYV8 1xPhospho [S287(94.2)]	1	0.67	0.0445058	-0.25	0.738264	0.92	0.0809729
RGSVSSVSPKPPSSFK	Q9NZJ0	DTL	Denticleless protein homolog	Q9NZJ0 [483-498]	S(3): 0.0; S(5): 0.0; S(6): 0.0; S(8): 99.0; S(13): 0.9; S(14): 0.1	Q9NZJ0 1xPhospho [S490(99)]	3	0.24	0.209885	-0.3	0.279013	0.53	0.0809729
GTPKPPGPPAQPPGPPNASSNPDLRR	Q8N4C8	MINK1	Misshapen-like kinase 1	Q8N4C8 [714-739]	T(2): 0.0; S(19): 8.5; S(20): 91.5	Q8N4C8 1xPhospho [S733(91.5)]	2	-0.4	0.123021	0.14	0.406392	-0.54	0.0809729
ALAAGADSPKTEEAR	Q4KMP7	TBC1D10B	TBC1 domain family member 10B	Q4KMP7 [125-139]	S(8): 99.9; T(11): 0.1	Q4KMP7 1xPhospho [S132(99.9)]	1	-0.54	0.0425931	0.05	0.752944	-0.59	0.0809729
SSVLPSPSGR	P35658	NUP214	Nuclear pore complex protein Nup214	P35658 [641-650]	S(1): 0.0; S(2): 0.0; S(6): 7.8; S(8): 92.2	P35658 1xPhospho [S648(92.2)]	2	1.28	0.00136867	0.7	0.138259	0.58	0.0810433
KPVTVSPTTPTSPTEGEAS	Q9Y6G9	DYNC1LI1	Cytoplasmic dynein 1 light intermediate chain 1	Q9Y6G9 [505-523]	T(4): 0.0; S(6): 0.0; T(8): 0.0; T(9): 0.0; T(11): 0.6; S(12): 98.9; T(14): 0.6; S(19): 0.0	Q9Y6G9 1xPhospho [S516(75.4)]	3	-0.21	0.301583	0.31	0.21031	-0.51	0.0814247
KDQALPVWSPK	Q9Y228	TRAF3IP3	TRAF3-interacting JNK-activating modulator	Q9Y228 [437-447]	S(9): 100.0	Q9Y228 1xPhospho [S445(100)]	1	1.83	0.00792319	0.55	0.680471	1.28	0.0815159
DASVPLIDVTNLPTPR	Q96A65	EXOC4	Exocyst complex component 4	Q96A65 [224-239]	S(3): 100.0; T(10): 0.0; T(14): 0.0	Q96A65 1xPhospho [S226(100)]	5	0.7	0.0249291	-0.08	0.933727	0.77	0.0815531
TPNTEQQTPLFQVISPQR	Q8IZD4	DCP1B	mRNA-decapping enzyme 1B	Q8IZD4 [497-514]	T(1): 0.0; T(4): 0.0; T(8): 0.0; S(15): 100.0	Q8IZD4 1xPhospho [S511(100)]	2	0.55	0.0321973	0.98	0.00625781	-0.43	0.0822358
QVAEQGGDLSPAANR	O94804	STK10	Serine/threonine-protein kinase 10	O94804 [429-443]	S(10): 100.0	O94804 1xPhospho [S438(100)]	3	-0.76	0.00579219	-0.15	0.54451	-0.62	0.0822358
LSTSTTIENIEITIK	Q9UEY8	ADD3	Gamma-adducin	Q9UEY8 [649-663]	S(2): 5.6; T(3): 5.6; S(4): 5.6; T(5): 5.6; T(6): 77.4; T(13): 0.0	Q9UEY8 1xPhospho [T654(87.4)]	10	0.36	0.189036	-0.53	0.304007	0.89	0.0822905
SESQMDITDINTPKPK	P08473	MME	Neprilysin	P08473 [4-19]	S(1): 0.0; S(3): 100.0; T(8): 0.0; T(12): 0.0	P08473 1xPhospho [S6(100)]	1	-0.43	0.164383	0.33	0.338862	-0.76	0.0822905
CICPSLPYSPVSSPQSSPR	Q96RR4	CAMKK2	Calcium/calmodulin-dependent protein kinase kinase 2	Q96RR4 [121-139]	S(5): 0.0; Y(8): 0.2; S(9): 99.9; S(12): 49.7; S(13): 49.7; S(16): 0.6; S(17): 0.0	Q96RR4 2xPhospho [S129(98.3); S132(87.5)]	2	-0.74	0.00788559	-0.18	0.674186	-0.56	0.0822905
SSAPPSLAGPAVSHRGRK	Q6ZRS2	SRCAP	Helicase SRCAP	Q6ZRS2 [3210-3227]	S(1): 100.0; S(2): 100.0; S(6): 100.0; S(13): 0.0	Q6ZRS2 3xPhospho [S3210(100); S3211(100); S3215(100)]	1	1.41	0.00477314	0.55	0.471452	0.87	0.0824731
RSSSSSAAASTPPPGPPAPADPLGYLPLHGGYQYK	Q8NDT2	RBM15B	Putative RNA-binding protein 15B	Q8NDT2 [228-262]	S(2): 0.8; S(3): 3.5; S(4): 3.5; S(5): 15.9; S(6): 75.6; S(10): 5.2; T(11): 95.4; Y(25): 0.0; Y(32): 0.0; Y(34): 0.0	Q8NDT2 2xPhospho [S233(75.6); T238(95.4)]	1	0.39	0.164318	-0.45	0.340437	0.84	0.0827123
IMSSIGEGIDFSQER	Q92625	ANKS1A	Ankyrin repeat and SAM domain-containing protein 1A	Q92625 [674-688]	S(3): 93.6; S(4): 6.4; S(12): 0.0	Q92625 1xPhospho [S676(93.6)]	5	-0.49	0.0548997	0.07	0.675495	-0.56	0.0827123
AEKPPLSASSPQQRPPEPETGESAGTSR	Q9Y3Q8	TSC22D4	TSC22 domain family protein 4	Q9Y3Q8 [181-208]	S(7): 0.0; S(9): 0.0; S(10): 0.0; T(20): 0.1; S(23): 5.4; T(26): 47.3; S(27): 47.3		4	1.24	0.000532885	0.81	0.040138	0.43	0.0829823
EQMIDLQNLLTTQSPSVK	Q9BVJ6	UTP14A	U3 small nucleolar RNA-associated protein 14 homolog A	Q9BVJ6 [556-573]	T(11): 0.0; T(12): 0.5; S(14): 99.5; S(16): 0.0	Q9BVJ6 1xPhospho [S569(99.5)]	1	1	0.00985724	0.21	0.754632	0.79	0.0833583
KLESLDALEPEEK	Q14807	KIF22	Kinesin-like protein KIF22	Q14807 [559-571]	S(4): 100.0	Q14807 1xPhospho [S562(100)]	1	0.8	0.0327617	-0.15	0.857006	0.95	0.0833583
TEKEPDATPPSPR	P28715	ERCC5	DNA repair protein complementing XP-G cells	P28715 [331-343]	T(1): 0.0; T(8): 0.0; S(11): 100.0	P28715 1xPhospho [S341(100)]	1	-0.22	0.393982	0.39	0.17365	-0.62	0.0835149
VDSPVIFDLEDLDSETDVSK	Q7Z401	DENND4A	C-myc promoter-binding protein	Q7Z401 [1115-1134]	S(3): 0.0; S(14): 92.7; T(16): 7.3; S(19): 0.0	Q7Z401 1xPhospho [S1128(92.7)]	1	-0.59	0.278589	0.49	0.229032	-1.08	0.0835149
DDGSSMSFYVRPSPAKR	Q9NYB0	TERF2IP	Telomeric repeat-binding factor 2-interacting protein 1	Q9NYB0 [24-40]	S(4): 0.0; S(5): 0.0; S(7): 0.0; Y(9): 0.0; S(13): 100.0	Q9NYB0 1xPhospho [S36(100)]	2	0.81	0.0108219	0.14	0.785929	0.68	0.0837342
VSSSSPQSGCPSPTIPAGK	Q76L83	ASXL2	Putative Polycomb group protein ASXL2	Q76L83 [135-153]	S(2): 4.8; S(3): 4.8; S(4): 4.8; S(5): 42.7; S(8): 42.7; S(12): 0.0; T(14): 0.0	Q76L83 1xPhospho [S146(90)]	2	-0.49	0.0620404	0.17	0.635917	-0.64	0.0837342
RPSVSFAEGTK	Q14162	SCARF1	Scavenger receptor class F member 1	Q14162 [587-597]	S(3): 99.8; S(5): 0.3; T(10): 0.0	Q14162 1xPhospho [S589(99.8)]	1	-0.08	0.62039	-1.34	0.0351115	1.26	0.0838268
PQPAPADGADPPPAEEPEARPDGEGSPGK	P11274	BCR	Breakpoint cluster region protein	P11274 [97-125]	S(26): 100.0	P11274 1xPhospho [S122(100)]	2	-0.36	0.159292	0.26	0.352584	-0.61	0.0840042
SAPPSPPPPGTR	Q9Y4H4	GPSM3	G-protein-signaling modulator 3	Q9Y4H4 [35-46]	S(1): 100.0; S(5): 100.0; T(11): 0.0	Q9Y4H4 2xPhospho [S35(100); S39(100)]	6	0.03	0.914021	0.49	0.0548623	-0.47	0.0841091
FFVAVPGQVISPQSSSSGTDLTGDK	O60271	SPAG9	C-Jun-amino-terminal kinase-interacting protein 4	O60271 [1228-1252]	S(11): 0.0; S(14): 0.1; S(15): 1.1; S(16): 80.2; S(17): 9.2; T(19): 9.2; T(22): 0.1		2	0.09	0.77673	0.64	0.0444003	-0.56	0.0843517
LLLAADPGGSPAQR	Q5SQI0	ATAT1	Alpha-tubulin N-acetyltransferase 1	Q5SQI0 [306-319]	S(10): 100.0	Q5SQI0 1xPhospho [S315(100)]	1	1.21	0.00776127	0.33	0.652092	0.89	0.0843806
KSHEAEVLK	P16949	STMN1	Stathmin	P16949 [62-70]	S(2): 100.0	P16949 1xPhospho [S63(100)]	1	1.55	0.00290957	0.71	0.29715	0.83	0.0844575
VVGSMPTAGSAGSVPENLNLFPEPGSK	Q8WU79	SMAP2	Stromal membrane-associated protein 2	Q8WU79 [228-254]	S(4): 0.0; T(7): 0.3; S(10): 97.7; S(13): 2.0; S(26): 0.0	Q8WU79 1xPhospho [S237(97.7)]	4	-0.69	0.0213534	0.02	0.992513	-0.7	0.0844575
RASLSCGGPGGQDFAR	O60381	HBP1	HMG box-containing protein 1	O60381 [378-393]	S(3): 100.0; S(5): 0.0	O60381 1xPhospho [S380(100)]	1	0.74	0.00473195	0.19	0.456213	0.56	0.0845258
TASISSSPSEGTPTVGSYGCTPQSLPK	Q6PKG0	LARP1	La-related protein 1	Q6PKG0 [845-871]	T(1): 90.4; S(3): 9.4; S(5): 0.1; S(6): 0.1; S(7): 0.0; S(9): 0.0; T(12): 0.0; T(14): 0.0; S(17): 0.0; Y(18): 0.0; T(21): 0.0; S(24): 0.0	Q6PKG0 1xPhospho [T845(90.4)]	3	-0.31	0.33434	0.43	0.20092	-0.74	0.0845258
VSVSPGR	Q8IYB3	SRRM1	Serine/arginine repetitive matrix protein 1	Q8IYB3 [428-434]	S(2): 50.0; S(4): 50.0		1	-0.36	0.139577	0.24	0.388789	-0.61	0.0845258
AVDSSSEEIEVEVPVVDRR	Q9Y6X4	FAM169A	Soluble lamin-associated protein of 75 kDa	Q9Y6X4 [632-650]	S(4): 81.3; S(5): 9.4; S(6): 9.4	Q9Y6X4 1xPhospho [S635(81.3)]	1	-0.98	0.0013981	-0.44	0.136035	-0.54	0.0845258
RLELLPSAESPVCWLEQPESHQR	O95402	MED26	Mediator of RNA polymerase II transcription subunit 26	O95402 [328-350]	S(7): 1.4; S(10): 98.6; S(20): 0.0	O95402 1xPhospho [S337(98.6)]	2	0.54	0.0203093	0.03	0.988614	0.5	0.0855328
GLDLSSGLVVTSLCK	Q9Y2Y0	ARL2BP	ADP-ribosylation factor-like protein 2-binding protein	Q9Y2Y0 [136-150]	S(5): 7.3; S(6): 92.7; T(11): 0.0; S(12): 0.0	Q9Y2Y0 1xPhospho [S141(92.7)]	1	1.8	0.000411585	1.23	0.0273065	0.57	0.0858078
IAFNTPTAVQK	O43736	ITM2A	Integral membrane protein 2A	O43736 [4-14]	T(5): 100.0; T(7): 0.0	O43736 1xPhospho [T8(100)]	1	1.55	0.00777029	0.49	0.643726	1.06	0.0858078
GMSADYEEILDVPKPQKPK	Q8N567	ZCCHC9	Zinc finger CCHC domain-containing protein 9	Q8N567 [244-262]	S(3): 11.4; Y(6): 88.6	Q8N567 1xPhospho [Y249(88.6)]	1	1.52	0.00412505	0.71	0.403586	0.81	0.0858078
IISGSPLGSLAR	Q9BXL7	CARD11	Caspase recruitment domain-containing protein 11	Q9BXL7 [921-932]	S(3): 92.5; S(5): 7.5; S(9): 0.0	Q9BXL7 1xPhospho [S923(92.5)]	1	0.98	0.00924039	0.18	0.715213	0.8	0.0858078
KSQDLESVQEVGGSYWQR	Q9H583	HEATR1	HEAT repeat-containing protein 1	Q9H583 [1189-1206]	S(2): 100.0; S(7): 0.0; S(14): 0.0; Y(15): 0.0	Q9H583 1xPhospho [S1190(100)]	1	0.94	0.024255	-0.03	0.964785	0.98	0.0858078
RQSSIFGGADVGFSGGIPSPDK	Q9P2Y5	UVRAG	UV radiation resistance-associated gene protein	Q9P2Y5 [480-501]	S(3): 0.0; S(4): 0.0; S(14): 0.0; S(19): 100.0	Q9P2Y5 1xPhospho [S498(100)]	1	0.42	0.0857384	0.83	0.00979137	-0.4	0.0858078
EEPVSSGPEEAVGK	O00567	NOP56	Nucleolar protein 56	O00567 [565-578]	S(5): 6.4; S(6): 93.6	O00567 1xPhospho [S570(93.6)]	4	0.1	0.73863	0.6	0.0426011	-0.5	0.0858078
RKSAGNIPLSPLAR	O15021	MAST4	Microtubule-associated serine/threonine-protein kinase 4	O15021 [1371-1384]	S(3): 100.0; S(10): 0.0	O15021 1xPhospho [S1373(100)]	2	0.1	0.674439	-0.63	0.109269	0.73	0.0858078
LMPVSAQTPK	Q99549	MPHOSPH8	M-phase phosphoprotein 8	Q99549 [378-387]	S(5): 0.0; T(8): 100.0	Q99549 1xPhospho [T385(100)]	2	1.86	0.00517175	0.78	0.482679	1.07	0.085878
DALAALETPGRPSQQK	Q92547	TOPBP1	DNA topoisomerase 2-binding protein 1	Q92547 [841-856]	T(8): 100.0; S(13): 0.0	Q92547 1xPhospho [T848(100)]	1	1.84	0.00505044	0.77	0.473012	1.07	0.085878
TPSKEEIEKECEDTSLR	Q9Y2K5	R3HDM2	R3H domain-containing protein 2	Q9Y2K5 [35-51]	T(1): 0.4; S(3): 99.6; T(14): 0.0; S(15): 0.0	Q9Y2K5 1xPhospho [S37(99.6)]	1	0.2	0.370577	-0.66	0.188012	0.86	0.085878
PSPAISVSVSAPAFYAPQK	Q15942	ZYX	Zyxin	Q15942 [6-24]	S(2): 0.0; S(6): 0.0; S(8): 0.0; S(10): 100.0; Y(15): 0.0	Q15942 1xPhospho [S15(100)]	1	-1.29	0.000754853	-0.47	0.0621694	-0.82	0.085878
RGSMEQAPAVALPPTHK	Q8WUF5	PPP1R13L	RelA-associated inhibitor	Q8WUF5 [524-540]	S(3): 100.0; T(15): 0.0	Q8WUF5 1xPhospho [S526(100)]	2	0.18	0.458068	-0.95	0.15891	1.14	0.0860603
EPSATPPISNLTK	P30622	CLIP1	CAP-Gly domain-containing linker protein 1	P30622 [178-190]	S(3): 0.5; T(5): 99.5; S(9): 0.0; T(12): 0.0	P30622 1xPhospho [T182(99.5)]	1	0.88	0.00661929	0.26	0.571044	0.62	0.0863077
ESSTSEGADQKMSSPEDDSDTKR	Q15424	SAFB	Scaffold attachment factor B1	Q15424 [371-393]	S(2): 0.0; S(3): 0.0; T(4): 0.0; S(5): 0.0; S(13): 91.9; S(14): 8.1; S(19): 0.0; T(21): 0.0	Q15424 1xPhospho [S383(91.9)]	1	0.31	0.322975	0.9	0.0221607	-0.59	0.0863077
ELEQHIQTSDPENFQSEER	Q96K76	USP47	Ubiquitin carboxyl-terminal hydrolase 47	Q96K76 [925-943]	T(8): 7.9; S(9): 92.1; S(16): 0.0	Q96K76 1xPhospho [S933(90.8)]	4	0.13	0.556999	0.6	0.0331952	-0.48	0.0863293
ELTVDNSFEFEK	Q9UHA3	RSL24D1	Probable ribosome biogenesis protein RLP24	Q9UHA3 [62-73]	T(3): 99.4; S(7): 0.6	Q9UHA3 1xPhospho [T64(99.4)]	2	0.94	0.0292408	-0.13	0.912727	1.06	0.0869437
MEEESQSQGRDLTLEENQVK	Q14683	SMC1A	Structural maintenance of chromosomes protein 1A	Q14683 [354-373]	S(5): 50.0; S(7): 50.0; T(13): 0.0	Q14683 1xPhospho [S360(95.8)]	2	0.62	0.0235228	1.05	0.00577863	-0.43	0.0869542
SSSEDKITVHFINR	P10109	FDX1	Adrenodoxin, mitochondrial	P10109 [61-74]	S(1): 33.2; S(2): 33.2; S(3): 33.2; T(8): 0.4		3	1.01	0.0281739	-0.09	0.922772	1.09	0.0869831
HSSNPPLESHVGWVMDSR	Q6PKG0	LARP1	La-related protein 1	Q6PKG0 [822-839]	S(2): 50.0; S(3): 50.0; S(9): 0.0; S(17): 0.0		2	0.71	0.0244597	-0.02	0.967118	0.73	0.0869831
RLSEQLAHTPTAFK	Q9UBF8	PI4KB	Phosphatidylinositol 4-kinase beta	Q9UBF8 [509-522]	S(3): 100.0; T(9): 0.0; T(11): 0.0	Q9UBF8 1xPhospho [S511(100)]	1	-0.21	0.257568	-0.9	0.0193247	0.68	0.0869831
DCRTPLGASLDEQSSSTLK	P28290	SSFA2	Sperm-specific antigen 2	P28290 [84-102]	T(4): 100.0; S(9): 100.0; S(14): 0.0; S(15): 0.0; S(16): 0.0; T(17): 0.0	P28290 2xPhospho [T87(100); S92(100)]	1	0.43	0.0466019	-0.12	0.756863	0.54	0.0870199
EGSVLDILK	P49790	NUP153	Nuclear pore complex protein Nup153	P49790 [605-613]	S(3): 100.0	P49790 1xPhospho [S607(100)]	1	1.23	0.013825	0.19	0.855841	1.04	0.0870718
NNDEGSLDIYAGLDSAVSDSASK	Q9UKL3	CASP8AP2	CASP8-associated protein 2	Q9UKL3 [24-46]	S(6): 99.6; Y(10): 0.4; S(15): 0.0; S(18): 0.0; S(20): 0.0; S(22): 0.0	Q9UKL3 1xPhospho [S29(99.6)]	2	0.07	0.867174	-0.8	0.0820881	0.87	0.0870718
ENSREALAEAALESPRPALVR	O14745	SLC9A3R1	Na(+)/H(+) exchange regulatory cofactor NHE-RF1	O14745 [267-287]	S(3): 100.0; S(14): 0.0	O14745 1xPhospho [S269(100)]	1	-0.75	0.0111746	-0.09	0.773345	-0.67	0.0874225
TNLQPLESTQSQDF	Q9Y248	GINS2	DNA replication complex GINS protein PSF2	Q9Y248 [172-185]	T(1): 0.0; S(8): 0.3; T(9): 0.3; S(11): 99.4		5	-0.2	0.537546	0.54	0.139849	-0.74	0.0874905
LAAQLGAPTSPIPDSAIVNTR	Q9H8Y5	ANKZF1	Ankyrin repeat and zinc finger domain-containing protein 1	Q9H8Y5 [666-686]	T(9): 0.2; S(10): 99.6; S(15): 0.2; T(20): 0.0	Q9H8Y5 1xPhospho [S675(99.6)]	1	1	0.000657664	0.59	0.0498614	0.43	0.0875345
PASPASNVVVLPSGSTVYVK	Q7Z589	C11orf30	Protein EMSY	Q7Z589 [171-190]	S(3): 0.8; S(6): 99.2; S(13): 0.0; S(15): 0.0; T(16): 0.0; Y(18): 0.0	Q7Z589 1xPhospho [S176(99.9)]	2	-1.03	0.00246993	-0.31	0.24331	-0.73	0.0875927
SGPKPFSAPKPQTSPSPK	Q01518	CAP1	Adenylyl cyclase-associated protein 1	Q01518 [295-312]	S(1): 0.0; S(7): 0.0; T(13): 52.6; S(14): 52.6; S(16): 94.8	Q01518 2xPhospho [S310(94.8); T/S]	2	-1.16	0.00936111	-0.15	0.709907	-1.02	0.08763
QDDSPSGASYGQDYDLSPSR	Q9NYV4	CDK12	Cyclin-dependent kinase 12	Q9NYV4 [233-252]	S(4): 0.0; S(6): 0.0; S(9): 0.0; Y(10): 0.0; Y(14): 0.0; S(17): 92.3; S(19): 7.8	Q9NYV4 1xPhospho [S249(92.2)]	1	0.04	0.865625	0.5	0.0534512	-0.46	0.0878787
KEGQWDCSVCLVR	P49792	RANBP2	E3 SUMO-protein ligase RanBP2	P49792 [1606-1618]; [1665-1677]; [1724-1736]	S(8): 100.0	P49792 1xPhospho [S1613(100)]; 1xPhospho [S3277(100)]; 1xPhospho [S5000(100)]	1	1.66	0.000462736	2.06	0.000958281	-0.4	0.0879545
TAQASPNTELDFGGAAGSDVDQEEIVDER	Q9UBS8	RNF14	E3 ubiquitin-protein ligase RNF14	Q9UBS8 [158-186]	T(1): 0.0; S(5): 50.0; T(8): 50.0; S(18): 0.0	Q9UBS8 1xPhospho [S162(99.9)]	4	-0.27	0.300426	0.31	0.230227	-0.58	0.0883036
GTPPPVFTPPLPK	Q6NZY4	ZCCHC8	Zinc finger CCHC domain-containing protein 8	Q6NZY4 [478-490]	T(2): 100.0; T(8): 100.0	Q6NZY4 2xPhospho [T479(100); T485(100)]	2	1.59	0.0132726	0.28	0.832573	1.32	0.0883657
RLAAQLGAPTSPIPDSAIVNTR	Q9H8Y5	ANKZF1	Ankyrin repeat and zinc finger domain-containing protein 1	Q9H8Y5 [665-686]	T(10): 9.4; S(11): 90.6; S(16): 0.0; T(21): 0.0	Q9H8Y5 1xPhospho [S675(90.6)]	2	0.95	0.00626237	0.29	0.535878	0.67	0.088529
APQAGAHTPLTPQPGLAPQQQSPK	O15063	KIAA0355	Uncharacterized protein KIAA0355	O15063 [702-725]	T(8): 0.0; T(11): 0.0; S(22): 100.0	O15063 1xPhospho [S723(100)]	1	0.01	0.957923	0.51	0.0624111	-0.5	0.088529
STVTGERQSGDGQESTEPVENK	O15234	CASC3	Protein CASC3	O15234 [140-161]	S(1): 0.0; T(2): 0.0; T(4): 0.0; S(9): 100.0; S(15): 0.0; T(16): 0.0	O15234 1xPhospho [S148(100)]	2	-0.37	0.218364	0.3	0.29776	-0.67	0.0886105
FRSPAAPSPLALR	Q9P270	SLAIN2	SLAIN motif-containing protein 2	Q9P270 [460-472]	S(3): 100.0; S(8): 100.0	Q9P270 2xPhospho [S462(100); S467(100)]	1	1.6	0.0108595	0.4	0.755209	1.2	0.089003
QYPDSPHPVPHR	Q5VT52	RPRD2	Regulation of nuclear pre-mRNA domain-containing protein 2	Q5VT52 [961-972]	Y(2): 0.0; S(5): 100.0	Q5VT52 1xPhospho [S965(100)]	1	1.36	0.00116437	0.77	0.10387	0.6	0.089003
ENIKPNETSPSFSK	Q99700	ATXN2	Ataxin-2	Q99700 [764-777]	T(8): 0.6; S(9): 98.9; S(11): 0.6; S(13): 0.0	Q99700 1xPhospho [S772(98.9)]	1	-0.55	0.0386879	0.07	0.838678	-0.62	0.0900608
KEGSDGPLATSKPVPAEK	P08240	SRPR	Signal recognition particle receptor subunit alpha	P08240 [174-191]	S(4): 100.0; T(10): 0.0; S(11): 0.0	P08240 1xPhospho [S177(100)]	1	0.48	0.0179947	0.04	0.929619	0.44	0.0905757
LALLGLAQPSEKPSSPSPDLPFTTPAPK	Q9Y4U1	MMACHC	Methylmalonic aciduria and homocystinuria type C protein	Q9Y4U1 [231-258]	S(10): 0.3; S(14): 11.7; S(15): 11.7; S(17): 75.9; T(23): 0.3; T(24): 0.1	Q9Y4U1 1xPhospho [S240(86.6)]	2	0.69	0.00989881	0.14	0.716759	0.54	0.0905967
AGSISTLDSLDFAR	Q9P260	KIAA1468	LisH domain and HEAT repeat-containing protein KIAA1468	Q9P260 [178-191]	S(3): 79.6; S(5): 1.3; T(6): 9.6; S(9): 9.6	Q9P260 1xPhospho [S180(97)]	2	0.98	0.01739	0.12	0.919189	0.86	0.0906136
RPGHPAQPLPLPQTASSPQPQQK	O60346	PHLPP1	PH domain leucine-rich repeat-containing protein phosphatase 1	O60346 [396-418]	T(14): 0.1; S(16): 50.0; S(17): 50.0		1	-0.36	0.174763	0.26	0.357796	-0.62	0.0912993
EGEEPTVYSDEEEPKDESAR	O00264	PGRMC1	Membrane-associated progesterone receptor component 1	O00264 [173-192]	T(6): 4.3; Y(8): 47.9; S(9): 47.9; S(18): 0.0		1	0.17	0.618862	0.81	0.0380257	-0.64	0.091318
GDFSYIGNLMTK	Q9BPX3	NCAPG	Condensin complex subunit 3	Q9BPX3 [387-398]	S(4): 50.0; Y(5): 50.0; T(11): 0.0		3	0.03	0.894356	-0.81	0.0824259	0.85	0.0916724
RSVVSFDK	Q15424	SAFB	Scaffold attachment factor B1	Q15424 [600-607]	S(2): 100.0; S(5): 0.0	Q15424 1xPhospho [S601(100)]	1	0.32	0.235404	0.84	0.0191237	-0.52	0.0920277
LDPFADGGKTPDPK	O75533	SF3B1	Splicing factor 3B subunit 1	O75533 [133-146]	T(10): 100.0	O75533 1xPhospho [T142(100)]	2	0.72	0.014028	0.11	0.839115	0.6	0.0920576
EMFPYEASTPTGISASCR	P42167	TMPO	Lamina-associated polypeptide 2, isoforms beta/gamma	P42167 [347-364]	Y(5): 0.0; S(8): 8.0; T(9): 92.0; T(11): 0.0; S(14): 8.0; S(16): 92.0	P42167 2xPhospho [T355(92); S362(92)]	1	1.52	0.00244944	0.76	0.229442	0.78	0.0921217
YQEDSDPERSDYEEQQLQK	Q6P6C2	ALKBH5	RNA demethylase ALKBH5	Q6P6C2 [60-78]	Y(1): 0.0; S(5): 99.9; S(10): 0.1; Y(12): 0.0	Q6P6C2 1xPhospho [S64(99.9)]	2	0.29	0.468792	0.93	0.0303609	-0.63	0.0921367
QQLEEEEENFSRPQIDENPLDDNSEEEMEDAPK	Q5F1R6	DNAJC21	DnaJ homolog subfamily C member 21	Q5F1R6 [347-379]	S(11): 0.0; S(24): 100.0	Q5F1R6 1xPhospho [S370(100)]	1	-0.15	0.464957	0.35	0.167201	-0.5	0.0922835
SGVSITIDDPVR	Q9UKV3	ACIN1	Apoptotic chromatin condensation inducer in the nucleus	Q9UKV3 [987-998]	S(1): 0.0; S(4): 99.1; T(6): 0.8	Q9UKV3 1xPhospho [T992(88.7)]	2	0.75	0.0141389	0.11	0.838713	0.64	0.0929692
GYAFIEFASFEDAK	P19338	NCL	Nucleolin	P19338 [524-537]	Y(2): 0.0; S(9): 100.0	P19338 1xPhospho [S532(100)]	1	0.64	0.0242252	-0.01	0.993289	0.65	0.0930318
AQHPDYSFGELSR	Q86U86	PBRM1	Protein polybromo-1	Q86U86 [1399-1411]	Y(6): 0.0; S(7): 100.0; S(12): 0.0	Q86U86 1xPhospho [S1405(100)]	1	1.56	0.000268568	1.12	0.0142027	0.43	0.0930921
YSGAYGASVSDEELK	Q9NX63	CHCHD3	MICOS complex subunit MIC19	Q9NX63 [49-63]	Y(1): 95.7; S(2): 4.3; Y(5): 0.0; S(8): 0.0; S(10): 0.0		5	0.81	0.00554724	1.19	0.00312236	-0.39	0.0930921
TLLTGDGGGEATGSPLAQGK	Q6WCQ1	MPRIP	Myosin phosphatase Rho-interacting protein	Q6WCQ1 [878-897]	T(1): 0.0; T(4): 0.0; T(12): 0.3; S(14): 99.7	Q6WCQ1 1xPhospho [S891(99.7)]	1	0.27	0.19231	-0.32	0.341739	0.58	0.0931291
RNFELVDSSPCK	Q96GX5	MASTL	Serine/threonine-protein kinase greatwall	Q96GX5 [445-456]	S(8): 95.5; S(9): 4.5	Q96GX5 1xPhospho [S452(95.5)]	1	0.58	0.0523702	1.01	0.00816711	-0.42	0.0934566
TGSGSPFAGNSPAR	Q9UPT8	ZC3H4	Zinc finger CCCH domain-containing protein 4	Q9UPT8 [1265-1278]	T(1): 5.7; S(3): 47.1; S(5): 47.1; S(11): 0.0		2	-0.46	0.122402	0.19	0.467202	-0.65	0.0938565
TLEPVKPPTVPNDYMTSPAR	Q8IZP0	ABI1	Abl interactor 1	Q8IZP0 [200-219]	T(1): 0.0; T(9): 1.2; Y(14): 7.3; T(16): 45.8; S(17): 45.8		4	1.63	0.0114226	0.45	0.75284	1.18	0.0946213
SGLQLSLEQGTGENSFR	P23497	SP100	Nuclear autoantigen Sp-100	P23497 [166-182]	S(1): 0.0; S(6): 0.0; T(11): 0.0; S(15): 100.0	P23497 1xPhospho [S180(100)]	2	1.36	0.000974433	1.76	0.00141318	-0.4	0.0946213
TSVSQASGLLLETPVQPAFSLPK	Q12815	TROAP	Tastin	Q12815 [240-262]	T(1): 25.0; S(2): 25.0; S(4): 25.0; S(7): 25.0; T(13): 0.0; S(20): 0.0		3	1.22	0.0317029	-0.14	0.919366	1.36	0.0946213
GDDTDTRDDISILATGCK	Q12888	TP53BP1	Tumor suppressor p53-binding protein 1	Q12888 [588-605]	T(4): 100.0; T(6): 0.0; S(11): 0.0; T(15): 0.0	Q12888 1xPhospho [T591(100)]	1	1.09	0.00281657	0.52	0.255334	0.58	0.0946213
SKVEETTEHLVTK	P52732	KIF11	Kinesin-like protein KIF11	P52732 [1033-1045]	S(1): 98.9; T(6): 1.0; T(7): 0.1; T(12): 0.0	P52732 1xPhospho [S1033(98.9)]	1	0.84	0.00755663	0.25	0.586261	0.59	0.0946213
KTGSPGGPGVSGGSPAGGAGGGSSGLPPSTK	Q9Y6G9	DYNC1LI1	Cytoplasmic dynein 1 light intermediate chain 1	Q9Y6G9 [455-485]	T(2): 4.4; S(4): 72.4; S(11): 17.3; S(14): 4.4; S(23): 0.3; S(24): 1.2; S(29): 0.0; T(30): 0.0		2	0.58	0.0552323	-0.18	0.737073	0.76	0.0946213
IMSCSPDTQCSR	Q9C0C9	UBE2O	E2/E3 hybrid ubiquitin-protein ligase UBE2O	Q9C0C9 [397-408]	S(3): 99.0; S(5): 1.0; T(8): 0.0; S(11): 0.0	Q9C0C9 1xPhospho [S399(99)]	1	0.52	0.0863096	-0.3	0.581976	0.81	0.0946213
METVSNASSSSNPSSPGR	Q9NTI5	PDS5B	Sister chromatid cohesion protein PDS5 homolog B	Q9NTI5 [1152-1169]	T(3): 0.0; S(5): 0.0; S(8): 0.0; S(9): 0.0; S(10): 0.0; S(11): 0.0; S(14): 0.0; S(15): 100.0	Q9NTI5 1xPhospho [S1166(99.5)]	3	0.24	0.334316	0.73	0.0244839	-0.49	0.0946213
GDVTAEEAAGASPAKANGQENGHVKSNGDLSPK	P49006	MARCKSL1	MARCKS-related protein	P49006 [11-43]	T(4): 0.0; S(12): 95.3; S(26): 95.3; S(31): 9.4	P49006 2xPhospho [S22(95.3); S36(95.3)]	1	0.05	0.821172	0.54	0.0533027	-0.49	0.0946213
EDSGSVPSTGPSQGTPISLK	Q13111	CHAF1A	Chromatin assembly factor 1 subunit A	Q13111 [851-870]	S(3): 0.0; S(5): 0.0; S(8): 0.0; T(9): 0.0; S(12): 0.1; T(15): 99.5; S(18): 0.4	Q13111 1xPhospho [T865(99.5)]	1	-0.25	0.311131	0.33	0.239161	-0.57	0.0946213
ESIPSLPQSPMR	Q8NEZ4	KMT2C; MLL3	Histone-lysine N-methyltransferase 2C	Q8NEZ4 [4259-4270]	S(2): 0.0; S(5): 0.0; S(9): 100.0	Q8NEZ4 1xPhospho [S4267(100)]	1	-0.45	0.038885	0.07	0.857344	-0.5	0.0946213
SPLAQMEEERR	Q16181	SEPT7	Septin-7	Q16181 [334-344]	S(1): 100.0	Q16181 1xPhospho [S334(100)]	1	0.97	0.0055017	0.34	0.462312	0.62	0.0951354
VLLQASQDENFGNTTPR	P57740	NUP107	Nuclear pore complex protein Nup107	P57740 [32-48]	S(6): 100.0; T(14): 0.0; T(15): 0.0	P57740 1xPhospho [T46(100)]	3	0.61	0.0197446	0.06	0.939452	0.55	0.0951354
YEDYSELGELPPRSPLEPVCEDGPFGPPPEEK	Q86TI0	TBC1D1	TBC1 domain family member 1	Q86TI0 [682-713]	Y(1): 0.0; Y(4): 0.0; S(5): 0.0; S(14): 100.0	Q86TI0 1xPhospho [S695(100)]	4	-0.43	0.0537727	0.08	0.749816	-0.52	0.0951354
RNSSSPVSPASVPGQR	Q9H1B7	IRF2BPL	Interferon regulatory factor 2-binding protein-like	Q9H1B7 [655-670]	S(3): 0.0; S(4): 0.1; S(5): 0.1; S(8): 96.8; S(11): 2.9	Q9H1B7 1xPhospho [S662(96.8)]	2	-0.1	0.680579	0.38	0.120186	-0.48	0.0951371
SKTFDWAEFRPIQQALAQER	Q6WCQ1	MPRIP	Myosin phosphatase Rho-interacting protein	Q6WCQ1 [540-559]	S(1): 50.0; T(3): 50.0		4	-0.11	0.711027	0.48	0.114811	-0.59	0.0951371
KSPFLSSAEGAVPK	Q6UB99	ANKRD11	Ankyrin repeat domain-containing protein 11	Q6UB99 [608-621]	S(2): 3.4; S(6): 48.3; S(7): 48.3		2	0.55	0.0353069	-0.06	0.893147	0.62	0.0952505
HAAFVTPDQK	P10244	MYBL2	Myb-related protein B	P10244 [500-509]	T(6): 100.0	P10244 1xPhospho [T505(100)]	1	0.71	0.0725766	-0.39	0.646495	1.1	0.0956126
RRGSMEQAPAVALPPTHK	Q8WUF5	PPP1R13L	RelA-associated inhibitor	Q8WUF5 [523-540]	S(4): 100.0; T(16): 0.0	Q8WUF5 1xPhospho [S526(100)]	1	0.22	0.370996	-0.87	0.208885	1.1	0.0956146
MSFEILRGSDGEDSASGGK	Q14674	ESPL1	Separin	Q14674 [1500-1518]	S(2): 0.1; S(9): 99.5; S(14): 0.4; S(16): 0.0	Q14674 1xPhospho [S1513(85.8)]	2	0.11	0.556905	0.5	0.0358804	-0.39	0.0958096
PSSPGGLPEEDSVLFNK	Q5R372	RABGAP1L	Rab GTPase-activating protein 1-like	Q5R372 [117-133]	S(2): 93.3; S(3): 6.7; S(12): 0.0	Q5R372 1xPhospho [S118(93.3)]	6	-0.46	0.0689382	0.07	0.667467	-0.54	0.0958096
SLDFPQNEPQIK	Q8NEF9	SRFBP1	Serum response factor-binding protein 1	Q8NEF9 [367-378]	S(1): 100.0	Q8NEF9 1xPhospho [S367(100)]	1	1.75	0.0274806	-0.11	0.968254	1.86	0.0958237
SVSSSVQVCPEVGK	Q8IXW5	RPAP2	Putative RNA polymerase II subunit B1 CTD phosphatase RPAP2	Q8IXW5 [350-363]	S(1): 99.5; S(3): 0.2; S(4): 0.2; S(5): 0.2	Q8IXW5 1xPhospho [S350(99.5)]	3	0.78	0.0130335	0.17	0.789012	0.61	0.0958444
SSPNVANQPPSPGGK	P55196	MLLT4	Afadin	P55196 [1172-1186]	S(1): 94.3; S(2): 5.7; S(11): 0.0	P55196 1xPhospho [S1172(94.3)]	1	-0.39	0.0468591	0.1	0.799343	-0.5	0.0958553
VAFSEITSPSK	Q13415	ORC1	Origin recognition complex subunit 1	Q13415 [266-276]	S(4): 0.0; T(7): 0.0; S(8): 100.0; S(10): 0.0	Q13415 1xPhospho [S273(100)]	2	1.2	0.000477172	0.79	0.0304725	0.42	0.0959652
WEGGDSNSDDYDLESDMSNGWDPNEMFK	Q8WWM7	ATXN2L	Ataxin-2-like protein	Q8WWM7 [231-258]	S(6): 84.0; S(8): 8.0; Y(11): 8.0; S(15): 0.0; S(18): 0.0	Q8WWM7 1xPhospho [S236(84)]	1	-0.87	0.00230439	-0.3	0.205579	-0.57	0.0959652
AMSTTSISSPQPGK	Q9UJU6	DBNL	Drebrin-like protein	Q9UJU6 [267-280]	S(3): 0.0; T(4): 0.0; T(5): 0.0; S(6): 0.0; S(8): 5.4; S(9): 94.6		7	1.42	0.00373117	0.66	0.331645	0.76	0.0962821
DRPVSQPSLVGSK	Q9H4A3	WNK1	Serine/threonine-protein kinase WNK1	Q9H4A3 [163-175]	S(5): 100.0; S(8): 0.0; S(12): 0.0	Q9H4A3 1xPhospho [S167(100)]	1	0.64	0.0127416	1.02	0.00461313	-0.38	0.0972665
AAVGEEKDINTFVGTPVEK	P46013	MKI67	Antigen KI-67	P46013 [1909-1927]	T(11): 0.1; T(15): 99.9	P46013 1xPhospho [T1923(99.9)]	1	0.96	0.0458398	-0.27	0.813965	1.24	0.0977761
HVSPVTPPR	Q13443	ADAM9	Disintegrin and metalloproteinase domain-containing protein 9	Q13443 [756-764]	S(3): 100.0; T(6): 0.0	Q13443 1xPhospho [S758(100)]	2	-1.61	0.000528865	-0.74	0.0340259	-0.87	0.0979818
RSPSPSPTPEAK	Q8TAQ2	SMARCC2	SWI/SNF complex subunit SMARCC2	Q8TAQ2 [301-312]	S(2): 100.0; S(4): 100.0; S(6): 0.0; T(8): 0.0	Q8TAQ2 2xPhospho [S302(100); S304(100)]	1	0.44	0.222105	1.07	0.0193553	-0.63	0.0984945
ILDPNTGEPAPVLSSPPPADVSTFLAFPSPEK	P46060	RANGAP1	Ran GTPase-activating protein 1	P46060 [414-445]	T(6): 0.0; S(14): 13.5; S(15): 13.5; S(22): 13.5; T(23): 59.5; S(29): 100.0	P46060 2xPhospho [S442(100); S/T]	5	0.94	0.00510794	0.34	0.421958	0.6	0.0985694
SHRSPLTAASPGELPTEGAGPDVVEDISHLLADVAR	Q92619	HMHA1	Minor histocompatibility protein HA-1	Q92619 [90-125]	S(1): 69.2; S(4): 16.8; T(7): 19.4; S(10): 93.2; T(16): 1.4; S(28): 0.0	Q92619 2xPhospho [S99(90.6); S/T]	4	-0.04	0.835071	-0.57	0.0564314	0.52	0.0985694
QRSPSPAPAPAPAAAAGPPTR	Q9H7N4	SCAF1	Splicing factor, arginine/serine-rich 19	Q9H7N4 [496-516]	S(3): 100.0; S(5): 100.0; T(20): 0.0	Q9H7N4 2xPhospho [S498(100); S500(100)]	2	-0.33	0.0729027	0.06	0.659945	-0.4	0.0985694
SEVPEDLAGFIELFQTPSHTK	P46013	MKI67	Antigen KI-67	P46013 [1704-1724]	S(1): 0.0; T(16): 100.0; S(18): 0.0; T(20): 0.0	P46013 1xPhospho [T1719(92.7)]	4	0.99	0.0189567	0.13	0.913497	0.87	0.0987732
RLEEAHQAEKPQSPPK	Q92833	JARID2	Protein Jumonji	Q92833 [443-458]	S(13): 100.0	Q92833 1xPhospho [S455(100)]	1	-0.23	0.458535	0.36	0.179461	-0.59	0.0987732
FSEMMNNMGGDEDVDLPEVDGADDDSQDSDDEKMPDLE	Q15185	PTGES3	Prostaglandin E synthase 3	Q15185 [123-160]	S(2): 0.0; S(26): 100.0; S(29): 100.0	Q15185 2xPhospho [S148(100); S151(100)]	22	-0.59	0.018934	-0.03	0.913207	-0.56	0.0987732
NSPEDLGLSLTGDSCK	Q12888	TP53BP1	Tumor suppressor p53-binding protein 1	Q12888 [499-514]	S(2): 100.0; S(9): 0.0; T(11): 0.0; S(14): 0.0	Q12888 1xPhospho [S500(100)]	3	-0.96	0.00459312	-0.23	0.383747	-0.73	0.0990825
SASWGSTDQLK	Q6P1L5	FAM117B	Protein FAM117B	Q6P1L5 [271-281]	S(1): 48.8; S(3): 48.8; S(6): 2.5; T(7): 0.0		2	-0.1	0.643267	0.41	0.131772	-0.52	0.0991996
FSEMMNNMGGDEDVDLPEVDGADDDSQDSDDEKMPDLE	Q15185	PTGES3	Prostaglandin E synthase 3	Q15185 [123-160]	S(2): 0.0; S(26): 100.0; S(29): 100.0	Q15185 2xPhospho [S148(100); S151(100)]	7	-0.67	0.0259804	0.01	0.995609	-0.67	0.0991996
RNSVDTATSSSLSTPSEPLSPTSSLGEER	P13807	GYS1	Glycogen [starch] synthase, muscle	P13807 [708-736]	S(3): 0.0; T(6): 0.0; T(8): 0.0; S(9): 0.0; S(10): 0.0; S(11): 0.0; S(13): 0.0; T(14): 0.0; S(16): 0.0; S(20): 88.5; T(22): 1.0; S(23): 9.4; S(24): 1.0		4	-0.3	0.301995	0.33	0.256863	-0.62	0.0992035
VPSPPDEHQEAENAVSSGNR	Q9BXS6	NUSAP1	Nucleolar and spindle-associated protein 1	Q9BXS6 [133-152]	S(3): 100.0; S(16): 0.0; S(17): 0.0	Q9BXS6 1xPhospho [S135(100)]	2	0.56	0.0317814	-0.02	0.939452	0.57	0.0993349
LEEDRQSLDLSSEWWDDKLHAR	Q9HCU9	BRMS1	Breast cancer metastasis-suppressor 1	Q9HCU9 [167-188]	S(7): 100.0; S(11): 0.0; S(12): 0.0	Q9HCU9 1xPhospho [S173(100)]	1	-0.29	0.206343	-1.18	0.018821	0.88	0.100134
QEEEDRDSPGPQVPDPK	Q6NSJ2	PHLDB3	Pleckstrin homology-like domain family B member 3	Q6NSJ2 [247-263]	S(8): 100.0	Q6NSJ2 1xPhospho [S254(100)]	1	0.95	0.00365171	1.33	0.00279238	-0.38	0.100366
LVSSDPEINTK	Q9Y266	NUDC	Nuclear migration protein nudC	Q9Y266 [257-267]	S(3): 7.7; S(4): 92.3; T(10): 0.0	Q9Y266 1xPhospho [S260(92.3)]	1	-0.09	0.704691	0.42	0.122103	-0.5	0.100366
EKELVPEVPEEQGSKDR	P78559	MAP1A	Microtubule-associated protein 1A	P78559 [592-608]	S(14): 100.0	P78559 1xPhospho [S605(100)]	1	-0.2	0.349613	0.31	0.228654	-0.52	0.100366
DNSPPPAFKPEPPK	Q9UDY2	TJP2	Tight junction protein ZO-2	Q9UDY2 [984-997]	S(3): 100.0	Q9UDY2 1xPhospho [S986(100)]	1	0.4	0.256533	1.02	0.021657	-0.62	0.100393
SPQGPSPVLAEDSEGEG	Q99638	RAD9A	Cell cycle checkpoint control protein RAD9A	Q99638 [375-391]	S(1): 0.0; S(6): 0.0; S(13): 100.0	Q99638 1xPhospho [S387(100)]	5	0.2	0.349252	-0.39	0.229608	0.6	0.100646
KASGSGGGSAALGPSGFGPSGGSGTK	P25440	BRD2	Bromodomain-containing protein 2	P25440 [589-614]	S(3): 0.0; S(5): 0.0; S(9): 0.0; S(15): 0.0; S(20): 0.1; S(23): 50.0; T(25): 50.0		1	0.94	0.0039214	0.4	0.332258	0.54	0.100963
NEMGIPQQTTSPENAGPQNTK	Q15398	DLGAP5	Disks large-associated protein 5	Q15398 [652-672]	T(9): 0.0; T(10): 0.0; S(11): 100.0; T(20): 0.0	Q15398 1xPhospho [S662(100)]	4	-0.31	0.20386	0.26	0.353858	-0.57	0.100965
AQENYEGSEEVSPPQTK	Q93008	USP9X	Probable ubiquitin carboxyl-terminal hydrolase FAF-X	Q93008 [2552-2568]	Y(5): 0.0; S(8): 0.0; S(12): 50.0; T(16): 50.0		1	0.78	0.0215158	0.07	0.942674	0.72	0.101088
PLIDLMTNTPDMNK	Q9NYZ3	GTSE1	G2 and S phase-expressed protein 1	Q9NYZ3 [669-682]	T(7): 0.0; T(9): 100.0	Q9NYZ3 1xPhospho [T677(100)]	2	0.54	0.120063	-0.47	0.50644	1.01	0.101088
VNFPENGFLSPDKLSLLEK	P31689	DNAJA1	DnaJ homolog subfamily A member 1	P31689 [326-344]	S(10): 0.0; S(15): 100.0	P31689 1xPhospho [S340(100)]	2	1.17	0.000532232	0.8	0.0334373	0.36	0.101316
LVGVRESVLPEDAILPLMK	Q70J99	UNC13D	Protein unc-13 homolog D	Q70J99 [778-796]	S(7): 100.0	Q70J99 1xPhospho [S784(100)]	1	2.37	0.000263844	2.76	0.0007308	-0.39	0.10138
AHRSPASPRVPPVPDYVAHPER	Q9Y5U2	TSSC4	Protein TSSC4	Q9Y5U2 [140-161]	S(4): 100.0; S(7): 100.0; Y(16): 0.0	Q9Y5U2 2xPhospho [S143(100); S146(100)]	1	1.43	0.00938105	0.46	0.642924	0.97	0.10138
RSSGELSSPLR	Q14162	SCARF1	Scavenger receptor class F member 1	Q14162 [604-614]	S(2): 4.7; S(3): 95.4; S(7): 0.0; S(8): 0.0	Q14162 1xPhospho [S606(95.4)]	1	0.64	0.0182677	0.01	0.892435	0.63	0.101408
HAEPLTDTGSETPTAR	Q86X53	ERICH1	Glutamate-rich protein 1	Q86X53 [51-66]	T(6): 0.0; T(8): 0.0; S(10): 0.0; T(12): 99.9; T(14): 0.0	Q86X53 1xPhospho [T62(99.9)]	1	1.77	0.00049874	1.28	0.0304481	0.49	0.101602
VSEEQTQPPSPAGAGMSTAMGR	Q16666	IFI16	Gamma-interferon-inducible protein 16	Q16666 [144-165]	S(2): 0.0; T(6): 0.0; S(10): 100.0; S(17): 0.0; T(18): 0.0	Q16666 1xPhospho [S153(99.9)]	12	-0.33	0.114523	0.15	0.524424	-0.48	0.101602
TWSTDDFFAGLREEGEDSMAQEEKEETGDDSD	Q9H6Y2	WDR55	WD repeat-containing protein 55	Q9H6Y2 [352-383]	T(1): 0.0; S(3): 0.0; T(4): 0.0; S(18): 0.0; T(27): 100.0; S(31): 100.0	Q9H6Y2 2xPhospho [T378(100); S382(100)]	2	-0.23	0.361973	0.29	0.225562	-0.52	0.101622
IGNTSPLTTLPESSAFAK	P0CG40	SP9	Transcription factor Sp9	P0CG40 [27-44]	T(4): 47.7; S(5): 47.7; T(8): 4.2; T(9): 0.4; S(13): 0.0; S(14): 0.0		3	0.23	0.315347	0.73	0.0248415	-0.51	0.101629
SPSFGDPQLSPEAR	O95425	SVIL	Supervillin	O95425 [261-274]	S(1): 0.0; S(3): 0.0; S(10): 100.0	O95425 1xPhospho [S270(100)]	1	-0.82	0.0180704	-0.1	0.884599	-0.73	0.10208
IDENSDKEMEVEESPEKIK	Q8N3X1	FNBP4	Formin-binding protein 4	Q8N3X1 [495-513]	S(5): 100.0; S(14): 100.0	Q8N3X1 2xPhospho [S499(100); S508(100)]	1	-0.01	0.982092	0.51	0.0795979	-0.51	0.102635
KLVPIKPAPLPLSPGK	Q02086	SP2	Transcription factor Sp2	Q02086 [66-81]	S(13): 100.0	Q02086 1xPhospho [S78(100)]	1	-0.08	0.706078	-0.73	0.0484416	0.65	0.102635
RASFAEK	Q15149	PLEC	Plectin	Q15149 [1719-1725]	S(3): 100.0	Q15149 1xPhospho [S1721(100)]	1	1.78	0.000232498	1.36	0.00971048	0.43	0.102831
TDEQALLSSILAK	Q6IAA8	LAMTOR1	Ragulator complex protein LAMTOR1	Q6IAA8 [48-60]	T(1): 0.0; S(8): 0.3; S(9): 99.7	Q6IAA8 1xPhospho [S56(99.7)]	1	0.4	0.275192	1.03	0.0232779	-0.63	0.102831
FDSSLLSSDDETK	P28715	ERCC5	DNA repair protein complementing XP-G cells	P28715 [556-568]	S(3): 0.0; S(4): 0.0; S(7): 6.1; S(8): 93.9; T(12): 0.0	P28715 1xPhospho [S563(93.9)]	3	-1.58	0.000266966	-0.78	0.0127549	-0.81	0.102831
SSSSPLVVVSVKSPNQSLR	Q96B01	RAD51AP1	RAD51-associated protein 1	Q96B01 [315-333]	S(1): 0.0; S(2): 0.0; S(3): 0.0; S(4): 0.0; S(10): 0.3; S(13): 97.8; S(17): 1.9	Q96B01 1xPhospho [S327(97.8)]	1	0.89	0.00458801	0.42	0.369681	0.47	0.103115
NRNSNVIPYDYNR	P08575	PTPRC	Receptor-type tyrosine-protein phosphatase C	P08575 [970-982]	S(4): 100.0; Y(9): 0.0; Y(11): 0.0	P08575 1xPhospho [S973(100)]	12	-0.01	0.974824	0.62	0.0814252	-0.63	0.103272
GELSPSFLNPPLPPSIDDR	P78559	MAP1A	Microtubule-associated protein 1A	P78559 [2446-2464]	S(4): 1.3; S(6): 98.7; S(15): 0.0	P78559 1xPhospho [S2451(98.7)]	2	-0.57	0.0229482	-0.01	0.952024	-0.57	0.103272
SSAGDTEFVHQNSQEIQR	O43164	PJA2	E3 ubiquitin-protein ligase Praja-2	O43164 [241-258]	S(1): 0.0; S(2): 0.0; T(6): 0.0; S(13): 100.0	O43164 1xPhospho [S253(100)]	1	0.99	0.0121919	0.22	0.730351	0.77	0.103799
TPQPSSPMDQMGK	O14497	ARID1A	AT-rich interactive domain-containing protein 1A	O14497 [377-389]	T(1): 0.0; S(5): 6.2; S(6): 93.8		2	0.34	0.131417	0.75	0.0147815	-0.41	0.103799
EKNTSSETTMEEELGLVGATADDTEAELIR	Q15021	NCAPD2	Condensin complex subunit 1	Q15021 [968-997]	T(4): 20.0; S(5): 20.0; S(6): 20.0; T(8): 20.0; T(9): 20.0; T(20): 0.0; T(24): 0.0		3	0.08	0.727934	-0.59	0.121938	0.67	0.103799
DQTCYNIIPLYNSMK	Q8WWQ0	PHIP	PH-interacting protein	Q8WWQ0 [1262-1276]	T(3): 0.0; Y(5): 0.0; Y(11): 50.0; S(13): 50.0		1	0.75	0.0103164	0.19	0.667481	0.56	0.103836
LGAGEGGEASVSPEK	Q13428	TCOF1	Treacle protein	Q13428 [1367-1381]	S(10): 0.0; S(12): 100.0	Q13428 1xPhospho [S1378(100)]	2	-0.19	0.372495	0.29	0.225037	-0.47	0.103836
SLTDSCLFEK	Q9UKA4	AKAP11	A-kinase anchor protein 11	Q9UKA4 [1483-1492]	S(1): 7.8; T(3): 91.4; S(5): 0.8	Q9UKA4 1xPhospho [T1485(91.4)]	1	-1.72	9.91491e-05	-0.96	0.00317607	-0.76	0.104389
FGQAATMEGIGAIGGTPPAFNR	Q15233	NONO	Non-POU domain-containing octamer-binding protein	Q15233 [435-456]	T(6): 0.0; T(16): 100.0	Q15233 1xPhospho [T450(100)]	6	1.09	0.00960924	0.32	0.636168	0.76	0.104569
LHKPPADSGVDLR	O15427	SLC16A3	Monocarboxylate transporter 4	O15427 [429-441]	S(8): 100.0	O15427 1xPhospho [S436(100)]	1	-0.99	0.00170691	-0.38	0.138621	-0.61	0.104569
TDTSPVLETAGTVAAMAATPSAR	Q8WWH5	TRUB1	Probable tRNA pseudouridine synthase 1	Q8WWH5 [16-38]	T(1): 33.2; T(3): 33.2; S(4): 33.2; T(9): 0.4; T(12): 0.0; T(19): 0.0; S(21): 0.0		3	-0.36	0.112339	0.14	0.54364	-0.5	0.105109
GAAGRPLELSDFR	P42167	TMPO	Lamina-associated polypeptide 2, isoforms beta/gamma	P42167 [369-381]	S(10): 100.0	P42167 1xPhospho [S378(100)]	2	0.97	0.00647333	0.31	0.479763	0.67	0.105178
LVSSPCCIVTSTYGWTANMER	P08238	HSP90AB1	Heat shock protein HSP 90-beta	P08238 [584-604]	S(3): 0.0; S(4): 0.0; T(10): 0.0; S(11): 1.5; T(12): 11.0; Y(13): 86.0; T(16): 1.5	P08238 1xPhospho [S587(88.1)]	3	0.05	0.838694	0.54	0.0610206	-0.49	0.105178
IILDLISESPIK	P61978	HNRNPK	Heterogeneous nuclear ribonucleoprotein K	P61978 [208-219]	S(7): 0.0; S(9): 100.0	P61978 1xPhospho [S216(100)]	3	0.41	0.0356624	-0.02	0.927572	0.42	0.105285
SVSSVLSSLTPAK	Q13330	MTA1	Metastasis-associated protein MTA1	Q13330 [555-567]	S(1): 0.0; S(3): 0.0; S(4): 0.0; S(7): 0.0; S(8): 0.0; T(10): 100.0		4	0.88	0.0104369	0.23	0.665127	0.65	0.105646
HGSYEDAVHSGALND	P17987	TCP1	T-complex protein 1 subunit alpha	P17987 [542-556]	S(3): 94.5; Y(4): 5.5; S(10): 0.0	P17987 1xPhospho [S544(94.5)]	1	0.12	0.555407	0.53	0.0396485	-0.41	0.105646
GESPPTPPGQPPISPK	Q92835	INPP5D	Phosphatidylinositol 3,4,5-trisphosphate 5-phosphatase 1	Q92835 [958-973]	S(3): 8.1; T(6): 91.9; S(14): 0.0	Q92835 1xPhospho [T963(91.9)]	2	-0.53	0.0447761	0.06	0.859381	-0.59	0.105646
SLVISPPVR	Q9UBW5	BIN2	Bridging integrator 2	Q9UBW5 [259-267]	S(1): 100.0; S(5): 0.0	Q9UBW5 1xPhospho [S259(100)]	2	0.19	0.370878	-0.44	0.229727	0.65	0.105713
FMSVQRPGPYDRPGTAR	P52597	HNRNPF	Heterogeneous nuclear ribonucleoprotein F	P52597 [201-217]	S(3): 50.0; Y(10): 50.0; T(15): 0.0		1	1.18	0.00208579	0.62	0.170542	0.56	0.10575
AATAARPPAPPPAPQPPSPTPSPPRPTLAR	Q96B36	AKT1S1	Proline-rich AKT1 substrate 1	Q96B36 [71-100]	T(3): 0.1; S(18): 82.1; T(20): 18.1; S(22): 94.9; T(27): 4.9	Q96B36 2xPhospho [S92(94.8); S/T]	4	-0.26	0.23127	0.25	0.33963	-0.51	0.10575
LLSESAQPLKK	Q9H3N1	TMX1	Thioredoxin-related transmembrane protein 1	Q9H3N1 [224-234]	S(3): 0.9; S(5): 99.2	Q9H3N1 1xPhospho [S228(99.2)]	1	0.26	0.126126	-0.19	0.511627	0.46	0.105781
TYSAPAINAIQGGSFESPKK	Q9H4L5	OSBPL3	Oxysterol-binding protein-related protein 3	Q9H4L5 [249-268]	T(1): 9.0; Y(2): 9.0; S(3): 82.1; S(14): 0.2; S(17): 99.8	Q9H4L5 2xPhospho [S251(82.1); S265(99.8)]	3	-0.07	0.780945	0.38	0.114414	-0.45	0.105812
EGESLEDLMK	P13796	LCP1	Plastin-2	P13796 [254-263]	S(4): 100.0	P13796 1xPhospho [S257(100)]	4	-0.19	0.357014	0.27	0.239027	-0.46	0.105812
APVASPAALGSTATASPAAPAR	Q6ZN55	ZNF574	Zinc finger protein 574	Q6ZN55 [713-734]	S(5): 99.9; S(11): 0.1; T(12): 0.0; T(14): 0.3; S(16): 99.7	Q6ZN55 2xPhospho [S717(99.9); S728(99.7)]	1	0.57	0.103032	-0.36	0.577319	0.93	0.106233
GEAAPGPAPPAPEATPPPASAAGK	Q9NSI2	FAM207A	Protein FAM207A	Q9NSI2 [20-43]	T(15): 100.0; S(20): 0.0	Q9NSI2 1xPhospho [T34(100)]	2	0.92	0.000866702	0.56	0.0610206	0.36	0.106257
KEPPLTPVPLKR	P09884	POLA1	DNA polymerase alpha catalytic subunit	P09884 [214-225]	T(6): 100.0	P09884 1xPhospho [T219(100)]	1	0.75	0.0582882	-0.25	0.769057	1	0.106257
LYESLLVGSLPDMNK	P13807	GYS1	Glycogen [starch] synthase, muscle	P13807 [404-418]	Y(2): 0.0; S(4): 0.0; S(9): 100.0	P13807 1xPhospho [S412(100)]	1	0.05	0.875167	0.56	0.0664073	-0.51	0.106767
KYGGPPPDSVYSGQQPSVGTEIFVGK	O60506	SYNCRIP	Heterogeneous nuclear ribonucleoprotein Q	O60506 [143-168]	Y(2): 0.0; S(9): 0.0; Y(11): 0.0; S(12): 0.0; S(17): 100.0; T(20): 0.0	O60506 1xPhospho [S159(100)]	2	0.13	0.501564	-0.45	0.18063	0.59	0.107064
DHNSEDEDEDKYADDIDMPGQNFDSK	O95391	SLU7	Pre-mRNA-splicing factor SLU7	O95391 [232-257]	S(4): 100.0; Y(12): 0.0; S(25): 0.0	O95391 1xPhospho [S235(100)]	1	-0.37	0.159359	0.24	0.442766	-0.61	0.107064
LSVPTSDEEDEVPAPK	Q8NE71	ABCF1	ATP-binding cassette sub-family F member 1	Q8NE71 [104-119]	S(2): 0.1; T(5): 49.9; S(6): 49.9		2	-0.41	0.231656	0.33	0.343469	-0.73	0.107064
RNSEGSELSCTEGSLTSSLDSR	Q5T5U3	ARHGAP21	Rho GTPase-activating protein 21	Q5T5U3 [1666-1687]	S(3): 99.4; S(6): 0.6; S(9): 0.0; T(11): 0.0; S(14): 0.0; T(16): 0.0; S(17): 0.0; S(18): 0.0; S(21): 0.0	Q5T5U3 1xPhospho [S1668(99.4)]	1	1.25	0.00132667	0.84	0.101264	0.41	0.107464
ATPTKAPAPVVLGSPVVLGPPVGQAR	Q6ZN55	ZNF574	Zinc finger protein 574	Q6ZN55 [151-176]	T(2): 98.7; T(4): 2.5; S(14): 98.7	Q6ZN55 2xPhospho [T152(98.7); S164(98.7)]	1	1.22	0.00183655	0.72	0.147053	0.51	0.107464
LGSPLAVDEALRRSDLVEEFWMK	Q7RTP6	MICAL3	Protein-methionine sulfoxide oxidase MICAL3	Q7RTP6 [1308-1330]	S(3): 100.0; S(14): 100.0	Q7RTP6 2xPhospho [S1310(100); S1321(100)]	1	1.11	0.0172226	0.19	0.841491	0.92	0.108125
EGSVLDILKSPGFASPK	P49790	NUP153	Nuclear pore complex protein Nup153	P49790 [605-621]	S(3): 0.0; S(10): 100.0; S(15): 0.0	P49790 1xPhospho [S614(100)]	2	1.1	0.00122804	0.64	0.0930617	0.45	0.108125
GRLGSVDSFER	O60343	TBC1D4	TBC1 domain family member 4	O60343 [584-594]	S(5): 100.0; S(8): 0.0	O60343 1xPhospho [S588(100)]	1	1.11	0.00371658	0.53	0.293631	0.58	0.108494
QMSLCGTPEK	Q9UPU5	USP24	Ubiquitin carboxyl-terminal hydrolase 24	Q9UPU5 [1283-1292]	S(3): 0.0; T(7): 100.0	Q9UPU5 1xPhospho [T1289(100)]	1	1.01	0.00375317	0.44	0.29554	0.57	0.108494
QASVTLQPLK	P78345	RPP38	Ribonuclease P protein subunit p38	P78345 [251-260]	S(3): 94.8; T(5): 5.3	P78345 1xPhospho [S253(94.8)]	1	0.6	0.0937061	-0.48	0.617814	1.08	0.108494
QNTASPGSPVNSHLPGSPK	Q8NDX1	PSD4	PH and SEC7 domain-containing protein 4	Q8NDX1 [127-145]	T(3): 0.0; S(5): 0.1; S(8): 98.2; S(12): 3.6; S(17): 98.2	Q8NDX1 2xPhospho [S134(98.2); S143(98.2)]	2	-0.18	0.344072	0.25	0.252068	-0.43	0.108494
SNTLNEKPALPVIR	Q9UMZ2	SYNRG	Synergin gamma	Q9UMZ2 [1098-1111]	S(1): 0.1; T(3): 100.0	Q9UMZ2 1xPhospho [T1100(100)]	1	0.11	0.869696	1.06	0.0669546	-0.95	0.108833
AVSVHEDQLQAPAERPLR	Q6F5E8	RLTPR	Leucine-rich repeat-containing protein 16C	Q6F5E8 [1360-1377]	S(3): 100.0	Q6F5E8 1xPhospho [S1362(100)]	1	0.07	0.740897	-0.54	0.125465	0.61	0.108833
RPAPAVSPGSWKPGPPGSPR	Q96JM3	CHAMP1	Chromosome alignment-maintaining phosphoprotein 1	Q96JM3 [302-321]	S(7): 100.0; S(10): 0.0; S(18): 0.0	Q96JM3 1xPhospho [S308(100)]	2	-0.71	0.00366894	-0.21	0.287644	-0.5	0.109139
TQSPEFEAQSSK	Q9H5H4	ZNF768	Zinc finger protein 768	Q9H5H4 [158-169]	T(1): 0.3; S(3): 99.7; S(10): 0.0; S(11): 0.0	Q9H5H4 1xPhospho [S160(99.7)]	1	-0.34	0.529541	0.51	0.175501	-0.85	0.109281
IATISLESKSPPK	Q8TEK3	DOT1L	Histone-lysine N-methyltransferase, H3 lysine-79 specific	Q8TEK3 [1204-1216]	T(3): 0.0; S(5): 0.0; S(8): 0.0; S(10): 100.0	Q8TEK3 1xPhospho [S1213(100)]	1	-0.53	0.0222293	-0.05	0.919598	-0.48	0.109644
GSESATYVPVAPPTPAWQPEIKPEPAWHDQDETSSVK	Q6PKG0	LARP1	La-related protein 1	Q6PKG0 [290-326]	S(2): 0.0; S(4): 0.0; T(6): 0.0; Y(7): 0.0; T(14): 0.1; T(33): 44.1; S(34): 44.1; S(35): 11.7		3	-0.46	0.0444911	0.06	0.87903	-0.52	0.109923
RSSGDVLETFNFLENADDSDEDEENDMIEGIPEGK	Q13033	STRN3	Striatin-3	Q13033 [239-273]	S(2): 0.0; S(3): 0.0; T(9): 0.0; S(19): 100.0	Q13033 1xPhospho [S257(100)]	2	0.05	0.857059	0.59	0.0661712	-0.55	0.10998
IACRSPQPDPVGTPTIFKPQSK	P46013	MKI67	Antigen KI-67	P46013 [2219-2240]	S(5): 100.0; T(13): 99.7; T(15): 0.3; S(21): 0.0	P46013 2xPhospho [S2223(100); T2231(99.7)]	1	1.08	0.0200222	0.18	0.8835	0.91	0.110876
PAPLVQQLSPSLLPNSKSPR	Q9Y6X9	MORC2	MORC family CW-type zinc finger protein 2	Q9Y6X9 [688-707]	S(9): 0.0; S(11): 0.0; S(16): 100.0; S(18): 100.0	Q9Y6X9 2xPhospho [S703(100); S705(100)]	2	0.88	0.0128535	0.2	0.719463	0.67	0.110876
SVAAEGALLPQTPPSPR	Q86X27	RALGPS2	Ras-specific guanine nucleotide-releasing factor RalGPS2	Q86X27 [315-331]	S(1): 0.0; T(12): 0.1; S(15): 100.0	Q86X27 1xPhospho [T326(89.4)]	3	-0.13	0.501569	0.26	0.185907	-0.39	0.110876
TEVSETARPSSPDTR	O75132	ZBED4	Zinc finger BED domain-containing protein 4	O75132 [614-628]	T(1): 0.0; S(4): 0.0; T(6): 0.0; S(10): 50.0; S(11): 50.0; T(14): 0.0		2	-0.64	0.0211752	-0.05	0.90211	-0.59	0.110876
WSSLACNIALDAVK	P49368	CCT3	T-complex protein 1 subunit gamma	P49368 [168-181]	S(2): 6.8; S(3): 93.2	P49368 1xPhospho [S170(93.2)]	2	-0.75	0.014396	-0.1	0.760809	-0.65	0.110876
YQDEVFGGFVTEPQEESEEEVEEPEER	Q13283	G3BP1	Ras GTPase-activating protein-binding protein 1	Q13283 [133-159]	Y(1): 0.0; T(11): 0.1; S(17): 99.9	Q13283 1xPhospho [S149(99.9)]	6	-0.19	0.343681	0.29	0.257862	-0.48	0.111092
KGLEFPMTDLDMLSPIHTPQR	O60784	TOM1	Target of Myb protein 1	O60784 [147-167]	T(8): 0.0; S(14): 100.0; T(18): 0.0	O60784 1xPhospho [S160(100)]	2	0.84	0.00581691	0.35	0.41695	0.49	0.111496
ILQLMPQLSPTPSMMPSPNSHAAGFK	Q9UGU0	TCF20	Transcription factor 20	Q9UGU0 [411-436]	S(9): 2.1; T(11): 95.8; S(13): 2.1; S(17): 97.8; S(20): 2.2	Q9UGU0 2xPhospho [T421(95.8); S427(97.8)]	1	0.6	0.0588107	-0.15	0.788505	0.76	0.111496
ILRLSTFEK	O94804	STK10	Serine/threonine-protein kinase 10	O94804 [9-17]	S(5): 93.9; T(6): 6.1	O94804 1xPhospho [S13(93.9)]	2	-0.51	0.023903	-1.24	0.00654258	0.73	0.111496
TCYPLESRPSLSLGTITDEEMK	Q14980	NUMA1	Nuclear mitotic apparatus protein 1	Q14980 [1936-1957]	T(1): 0.0; Y(3): 0.0; S(7): 0.0; S(10): 0.0; S(12): 92.1; T(15): 7.9; T(17): 0.0	Q14980 1xPhospho [T1950(99.4)]	2	-0.6	0.133048	0.26	0.515898	-0.86	0.111575
SGSSPNLNMGVGGPGQVMASQAQQSSPGLGLINSMVK	Q09472	EP300	Histone acetyltransferase p300	Q09472 [87-123]	S(1): 19.2; S(3): 19.2; S(4): 60.7; S(20): 0.4; S(25): 0.2; S(26): 0.2; S(34): 0.0		7	0.93	0.00552697	0.37	0.40161	0.55	0.111755
QQTEKPESEDEWER	O60231	DHX16	Putative pre-mRNA-splicing factor ATP-dependent RNA helicase DHX16	O60231 [153-166]	T(3): 0.0; S(8): 100.0	O60231 1xPhospho [S160(100)]	2	0.38	0.171799	0.87	0.0186317	-0.49	0.111781
RVSFGGHLRPELFDENLPPNTPLK	P46013	MKI67	Antigen KI-67	P46013 [505-528]	S(3): 100.0; T(21): 0.0	P46013 1xPhospho [S507(100)]	1	0.89	0.00270854	0.46	0.209841	0.44	0.111874
SQSLPTTLLSPVR	P28290	SSFA2	Sperm-specific antigen 2	P28290 [737-749]	S(1): 0.1; S(3): 47.1; T(6): 6.2; T(7): 46.9; S(10): 99.7	P28290 2xPhospho [S746(99.7); S/T]	1	0.85	0.00168033	0.47	0.127769	0.39	0.111874
KKPEDSPSDDDVLIVYELTPTAEQK	P49792	RANBP2	E3 SUMO-protein ligase RanBP2	P49792 [2621-2645]	S(6): 11.1; S(8): 88.9; Y(16): 0.0; T(19): 0.0; T(21): 0.0	P49792 1xPhospho [S2628(88.9)]	4	0.42	0.037021	-0.01	0.941906	0.43	0.111905
EEQSQITSQVTGQIGWR	Q96CW1	AP2M1	AP-2 complex subunit mu	Q96CW1 [146-162]	S(4): 0.0; T(7): 0.0; S(8): 0.0; T(11): 100.0	Q96CW1 1xPhospho [T156(100)]	6	-0.38	0.157644	0.24	0.465183	-0.62	0.111905
KAENAEGQTPAIGPDGEPLDETSQMSDLPVK	P51532	SMARCA4	Transcription activator BRG1	P51532 [588-618]	T(9): 0.0; T(22): 3.4; S(23): 3.4; S(26): 93.2	P51532 1xPhospho [S613(93.2)]	1	-0.66	0.051983	0.07	0.836833	-0.73	0.111905
VADPDHDHTGFLTEYVATR	P28482	MAPK1	Mitogen-activated protein kinase 1	P28482 [173-191]	T(9): 0.0; T(13): 0.0; Y(15): 100.0; T(18): 0.0	P28482 1xPhospho [Y187(100)]	1	0.81	0.0231779	0.07	0.922772	0.76	0.111923
LGYLVSPPQQIR	Q7Z6E9	RBBP6	E3 ubiquitin-protein ligase RBBP6	Q7Z6E9 [511-522]	Y(3): 0.0; S(6): 100.0	Q7Z6E9 1xPhospho [S516(100)]	1	0.54	0.0197671	0.07	0.872277	0.45	0.112236
LFSSSSSPPPAK	Q9UPT6	MAPK8IP3	C-Jun-amino-terminal kinase-interacting protein 3	Q9UPT6 [579-590]	S(3): 0.0; S(4): 0.0; S(5): 0.0; S(6): 5.7; S(7): 94.3	Q9UPT6 1xPhospho [S585(94.3)]	2	0.14	0.436214	0.53	0.0341427	-0.37	0.112236
GESAPTLSTSPSPSSPSPTSPSPTLGR	Q9H330	TMEM245	Transmembrane protein 245	Q9H330 [311-337]	S(3): 0.0; T(6): 0.0; S(8): 0.0; T(9): 0.0; S(10): 0.0; S(12): 0.0; S(14): 0.0; S(15): 0.1; S(17): 98.5; T(19): 1.2; S(20): 0.1; S(22): 0.0; T(24): 0.0		4	-1.34	0.0079245	-0.35	0.532583	-0.99	0.112236
LNRGSLSLDDFR	Q9Y5W7	SNX14	Sorting nexin-14	Q9Y5W7 [481-492]	S(5): 100.0; S(7): 0.0	Q9Y5W7 1xPhospho [S485(100)]	1	3.33	0.000866702	2.51	0.0572258	0.82	0.112247
LWEDSAGEK	Q86U86	PBRM1	Protein polybromo-1	Q86U86 [983-991]	S(5): 100.0	Q86U86 1xPhospho [S987(100)]	1	-0.02	0.938901	0.47	0.0947901	-0.49	0.112279
TPSTMENDSSNLDPSQAPSLAQPLVFSNSK	Q14157	UBAP2L	Ubiquitin-associated protein 2-like	Q14157 [291-320]	T(1): 0.0; S(3): 0.0; T(4): 0.0; S(9): 0.0; S(10): 0.0; S(15): 0.0; S(19): 2.4; S(27): 83.8; S(29): 13.8	Q14157 1xPhospho [S317(83.8)]	2	0.66	0.0120038	0.18	0.686498	0.49	0.112375
GEAPGAETPSLR	Q9BVT8	TMUB1	Transmembrane and ubiquitin-like domain-containing protein 1	Q9BVT8 [64-75]	T(8): 6.6; S(10): 93.4	Q9BVT8 1xPhospho [S73(92)]	3	1.2	0.00185784	0.7	0.141841	0.5	0.11242
HIEPELAGRDSPIR	P86790	CCZ1; CCZ1B	Vacuolar fusion protein CCZ1 homolog B	P86790 [256-269]	S(11): 100.0	P86790 1xPhospho [S266(100)]	1	-0.31	0.111835	0.11	0.578618	-0.43	0.112794
CSDSQSWEDIAPEIEPCAENR	Q12888	TP53BP1	Tumor suppressor p53-binding protein 1	Q12888 [781-801]	S(2): 33.3; S(4): 33.3; S(6): 33.3		4	-0.1	0.703604	0.43	0.137824	-0.53	0.112991
RYSDLTTLVAFPSSSVYPTK	P25205	MCM3	DNA replication licensing factor MCM3	P25205 [158-177]	Y(2): 44.6; S(3): 44.6; T(6): 5.4; T(7): 5.4; S(13): 0.0; S(14): 0.0; S(15): 0.0; Y(17): 0.0; T(19): 0.0		2	1.16	0.0520382	-0.32	0.841491	1.47	0.113016
SSLSGDEEDELFK	Q5T1M5	FKBP15	FK506-binding protein 15	Q5T1M5 [1161-1173]	S(1): 7.2; S(2): 92.3; S(4): 0.6	Q5T1M5 1xPhospho [S1162(92.2)]	7	-0.54	0.0158843	-0.07	0.787717	-0.47	0.113143
GLPEAEDSPCRAPVLPK	Q7Z5J4	RAI1	Retinoic acid-induced protein 1	Q7Z5J4 [1006-1022]	S(8): 100.0	Q7Z5J4 1xPhospho [S1013(100)]	1	0.99	0.0246042	0.09	0.9357	0.92	0.11341
ILDPNTGEPAPVLSSPPPADVSTFLAFPSPEK	P46060	RANGAP1	Ran GTPase-activating protein 1	P46060 [414-445]	T(6): 0.0; S(14): 0.0; S(15): 0.0; S(22): 0.0; T(23): 0.0; S(29): 100.0		4	-0.17	0.387967	0.27	0.239619	-0.44	0.113579
SSLSDEAPVLPNTTPDLLLATTAK	Q96FS4	SIPA1	Signal-induced proliferation-associated protein 1	Q96FS4 [842-865]	S(1): 82.1; S(2): 8.9; S(4): 8.9; T(13): 0.0; T(14): 0.0; T(21): 0.0; T(22): 0.0		7	-0.16	0.492889	0.38	0.194295	-0.54	0.113697
LGMNSPF	Q12767	KIAA0195	Uncharacterized protein KIAA0195	Q12767 [1350-1356]	S(5): 100.0	Q12767 1xPhospho [S1354(100)]	1	0.12	0.849474	0.83	0.0680749	-0.71	0.113969
SFSTGSDLGHWVTTPPDIPGSR	Q96AG3	SLC25A46	Solute carrier family 25 member 46	Q96AG3 [32-53]	S(1): 37.6; S(3): 37.6; T(4): 37.6; S(6): 87.1; T(13): 0.0; T(14): 0.0; S(21): 0.0	Q96AG3 2xPhospho [S37(87.1); S/T]	1	0	0.966223	-0.66	0.082007	0.66	0.113969
KEMISLLSPQKK	Q9Y2D8	SSX2IP	Afadin- and alpha-actinin-binding protein	Q9Y2D8 [286-297]	S(5): 0.0; S(8): 100.0	Q9Y2D8 1xPhospho [S293(100)]	1	0.54	0.0426543	0.91	0.00844377	-0.38	0.114161
HSQSMIEDAQLPLEQK	Q13576	IQGAP2	Ras GTPase-activating-like protein IQGAP2	Q13576 [1355-1370]	S(2): 92.8; S(4): 7.2	Q13576 1xPhospho [S1356(92.8)]	1	0.68	0.0239724	1.11	0.00656717	-0.43	0.114216
GFGLVAYAADSSDEEEEHGGHK	Q7Z7F0	KIAA0907	UPF0469 protein KIAA0907	Q7Z7F0 [561-582]	Y(7): 0.0; S(11): 0.1; S(12): 99.9		4	-0.06	0.778103	0.37	0.124833	-0.43	0.114216
INLCIHSEEEDMNLGLVR	P41002	CCNF	Cyclin-F	P41002 [768-785]	S(7): 100.0	P41002 1xPhospho [S774(100)]	1	-0.62	0.0866626	0.02	0.673602	-0.65	0.114216
EMAHGSQEAEAPGAVAGAAEVPREPPILPR	Q8IVD9	NUDCD3	NudC domain-containing protein 3	Q8IVD9 [141-170]	S(6): 100.0	Q8IVD9 1xPhospho [S146(100)]	1	1.58	0.000264853	1.19	0.0113306	0.39	0.114281
RASAGTPSLSAGVSPK	Q8TEK3	DOT1L	Histone-lysine N-methyltransferase, H3 lysine-79 specific	Q8TEK3 [1091-1106]	S(3): 0.0; T(6): 0.0; S(8): 0.0; S(10): 0.0; S(14): 100.0	Q8TEK3 1xPhospho [S1104(100)]	1	-0.03	0.970769	0.44	0.0919805	-0.47	0.114524
FILPEGASQGMTPFR	Q9UPN3	MACF1	Microtubule-actin cross-linking factor 1, isoforms 1/2/3/5	Q9UPN3 [7202-7216]	S(8): 0.0; T(12): 100.0	Q9UPN3 1xPhospho [T7213(100)]	1	2.36	0.00910496	1.02	0.57287	1.34	0.114549
MSQPGSPSPK	Q14839	CHD4	Chromodomain-helicase-DNA-binding protein 4	Q14839 [1530-1539]	S(2): 0.0; S(6): 100.0; S(8): 0.0	Q14839 1xPhospho [S1535(99.5)]	2	-0.11	0.654003	0.41	0.151073	-0.51	0.114612
NFYESDDDQKEK	O00203	AP3B1	AP-3 complex subunit beta-1	O00203 [272-283]	Y(3): 0.0; S(5): 100.0	O00203 1xPhospho [S276(100)]	1	-0.24	0.312718	0.29	0.292091	-0.54	0.114612
RASDSLSAR	Q8NB49	ATP11C	Phospholipid-transporting ATPase IG	Q8NB49 [1106-1114]	S(3): 4.8; S(5): 47.6; S(7): 47.6		1	0.28	0.250934	0.71	0.0241846	-0.43	0.114876
AASAAGAAGSAGGSSGAAGAAGGGAGAGTRPGDGGTASAGAAGPGAATK	Q9UKY7	CDV3	Protein CDV3 homolog	Q9UKY7 [28-76]	S(3): 0.1; S(10): 98.5; S(14): 0.5; S(15): 0.2; T(29): 0.2; T(36): 0.2; S(38): 0.5; T(48): 0.0	Q9UKY7 1xPhospho [S37(98.5)]	4	0.47	0.0392668	-0.02	0.936131	0.5	0.11503
TTPSVVAFTADGER	P38646	HSPA9	Stress-70 protein, mitochondrial	P38646 [86-99]	T(1): 33.3; T(2): 33.3; S(4): 33.3; T(9): 0.0		2	-0.45	0.0755242	0.1	0.723092	-0.55	0.115109
AFGSGIDIKPGTPPIAGR	Q9Y520	PRRC2C	Protein PRRC2C	Q9Y520 [2662-2679]	S(4): 0.0; T(12): 100.0	Q9Y520 1xPhospho [T2673(100)]	1	1.24	0.0120301	0.36	0.674393	0.88	0.115266
ESSPIPSPTSDR	Q01082	SPTBN1	Spectrin beta chain, non-erythrocytic 1	Q01082 [2163-2174]	S(2): 9.7; S(3): 90.2; S(7): 0.0; T(9): 0.0; S(10): 0.0	Q01082 1xPhospho [S2165(90.2)]	5	1.19	0.000743883	0.75	0.045262	0.43	0.115266
VEDATEREEEGDEGGQTHLSPTAPAPSAQLFAPK	O95248	SBF1	Myotubularin-related protein 5	O95248 [98-131]	T(5): 0.0; T(17): 97.3; S(20): 2.7; T(22): 0.1; S(27): 0.0	O95248 1xPhospho [T114(97.3)]	2	0.92	0.00331027	0.4	0.24434	0.51	0.115266
AENAEGQTPAIGPDGEPLDETSQMSDLPVK	P51532	SMARCA4	Transcription activator BRG1	P51532 [589-618]	T(8): 0.0; T(21): 11.1; S(22): 77.8; S(25): 11.1	P51532 1xPhospho [S610(77.8)]	3	-0.49	0.107936	0.17	0.602197	-0.67	0.115266
TQVAGGQLSFK	P46060	RANGAP1	Ran GTPase-activating protein 1	P46060 [16-26]	T(1): 0.0; S(9): 100.0	P46060 1xPhospho [S24(100)]	1	0.25	0.531314	0.91	0.0416019	-0.66	0.115318
AGDNIPEEQPVASTPTTVSDGENK	Q9Y320	TMX2	Thioredoxin-related transmembrane protein 2	Q9Y320 [270-293]	S(13): 0.0; T(14): 0.0; T(16): 0.8; T(17): 8.5; S(19): 90.7	Q9Y320 1xPhospho [S288(90.7)]	1	0.16	0.515508	0.63	0.040247	-0.48	0.115318
WIPGAADDSKLEVFTTPK	Q8WYP5	AHCTF1	Protein ELYS	Q8WYP5 [1242-1259]	S(9): 100.0; T(15): 0.0; T(16): 0.0	Q8WYP5 1xPhospho [S1250(100)]	2	1.47	0.00220362	1.93	0.00239863	-0.46	0.115908
VSRLSTSTTIENIEITIK	Q9UEY8	ADD3	Gamma-adducin	Q9UEY8 [646-663]	S(2): 23.3; S(5): 3.5; T(6): 3.5; S(7): 23.3; T(8): 23.3; T(9): 23.3; T(16): 0.0		2	0	0.981027	-1.19	0.0918991	1.2	0.11622
RQLQEDQENNLQDNQTSNSSPCR	Q92576	PHF3	PHD finger protein 3	Q92576 [1595-1617]	T(16): 0.1; S(17): 0.0; S(19): 50.0; S(20): 50.0	Q92576 1xPhospho [S1614(98.8)]	4	0.69	0.0663649	1.24	0.0107439	-0.56	0.116462
EFCNSPDCSAWK	O14524	TMEM194A; NEMP1	Transmembrane protein 194A	O14524 [364-375]	S(5): 100.0; S(9): 0.0	O14524 1xPhospho [S368(99.9)]	2	1.32	0.00489418	0.56	0.346153	0.76	0.116515
YPSLGQKPGGSDFLMK	O43768	ENSA	Alpha-endosulfine	O43768 [41-56]	Y(1): 50.0; S(3): 50.0; S(11): 0.0		2	0.26	0.474961	-0.88	0.206983	1.14	0.116515
RPSVNGEPGSVPPPR	Q8N3D4	EHBP1L1	EH domain-binding protein 1-like protein 1	Q8N3D4 [1255-1269]	S(3): 100.0; S(10): 0.0	Q8N3D4 1xPhospho [S1257(100)]	2	0.47	0.0543652	-0.09	0.843168	0.57	0.116821
RPESFTTPEGPKPR	Q14493	SLBP	Histone RNA hairpin-binding protein	Q14493 [56-69]	S(4): 97.6; T(6): 1.2; T(7): 1.2	Q14493 1xPhospho [S59(97.6)]	1	0.66	0.0171893	1.06	0.00589212	-0.41	0.116929
RASDTSLTQGIVAFR	Q9H0K1	SIK2	Serine/threonine-protein kinase SIK2	Q9H0K1 [585-599]	S(3): 99.9; T(5): 0.0; S(6): 0.1; T(8): 0.0	Q9H0K1 1xPhospho [S587(99.9)]	1	-0.35	0.164331	-1.29	0.0187969	0.94	0.116929
SAPVLNQIFEEGESDDEFDMDENLPPK	Q9NRH2	SNRK	SNF-related serine/threonine-protein kinase	Q9NRH2 [482-508]	S(1): 0.0; S(14): 100.0	Q9NRH2 1xPhospho [S495(100)]	1	-0.94	0.00858774	-0.23	0.542387	-0.7	0.116929
ESEDKPEIEDVGSDEEEEKK	P07900	HSP90AA1	Heat shock protein HSP 90-alpha	P07900 [251-270]	S(2): 0.0; S(13): 100.0	P07900 1xPhospho [S263(100)]	5	-0.16	0.541333	0.39	0.185226	-0.55	0.116937
VLLSPSIPSVGQDQTLSPGSK	Q13625	TP53BP2	Apoptosis-stimulating of p53 protein 2	Q13625 [553-573]	S(4): 49.9; S(6): 49.9; S(9): 0.2; T(15): 97.8; S(17): 2.2; S(20): 0.1	Q13625 2xPhospho [S556(97.7); S569(97.3)]	2	0.65	0.033047	-0.01	0.993505	0.66	0.117348
FSAVLVEPPPMSLPGAGLSSQELSGGPGDGP	Q13263	TRIM28	Transcription intermediary factor 1-beta	Q13263 [805-835]	S(2): 0.0; S(12): 0.1; S(19): 49.2; S(20): 49.2; S(24): 1.5		4	0.8	0.028661	1.29	0.00709245	-0.49	0.117463
AVLSDSPQLSEGK	Q7Z4H7	HAUS6	HAUS augmin-like complex subunit 6	Q7Z4H7 [547-559]	S(4): 50.0; S(6): 50.0; S(10): 0.0		2	1.03	0.0146349	0.26	0.7365	0.77	0.118
QFTPCQLLADHANSPNKK	P40939	HADHA	Trifunctional enzyme subunit alpha, mitochondrial	P40939 [743-760]	T(3): 0.0; S(14): 100.0	P40939 1xPhospho [S756(100)]	1	-0.1	0.671407	0.37	0.151774	-0.47	0.11807
DLNESPVKSFVSISEATDCLVDFKK	Q96RL1	UIMC1	BRCA1-A complex subunit RAP80	Q96RL1 [673-697]	S(5): 86.8; S(9): 12.8; S(12): 0.3; S(14): 0.0; T(17): 0.0	Q96RL1 1xPhospho [S677(86.8)]	1	0.14	0.515275	-0.48	0.194813	0.6	0.118302
SVPGTTSSPLVGDISPK	Q9UQR0	SCML2	Sex comb on midleg-like protein 2	Q9UQR0 [576-592]	S(1): 0.0; T(5): 3.4; T(6): 0.3; S(7): 48.2; S(8): 48.2; S(15): 100.0	Q9UQR0 2xPhospho [S590(100); S/T]	2	0.09	0.711904	-0.69	0.14318	0.78	0.119032
GLYDGPVCEVSVTPK	Q16555	DPYSL2	Dihydropyrimidinase-related protein 2	Q16555 [497-511]	Y(3): 0.0; S(11): 0.0; T(13): 100.0	Q16555 1xPhospho [T509(100)]	2	0.93	0.00505302	0.4	0.347965	0.53	0.119595
SRERPSQPEGLR	Q04637	EIF4G1	Eukaryotic translation initiation factor 4 gamma 1	Q04637 [1194-1205]	S(1): 98.4; S(6): 1.6	Q04637 1xPhospho [S1194(98.4)]	1	-0.85	0.0249269	-0.05	0.919598	-0.82	0.119595
SMSHQAAIASQR	Q4G0F5	VPS26B	Vacuolar protein sorting-associated protein 26B	Q4G0F5 [302-313]	S(1): 9.8; S(3): 90.0; S(10): 0.2	Q4G0F5 1xPhospho [S304(91.2)]	5	0.77	0.00425595	0.3	0.298654	0.47	0.119601
ADSPPPSYPTQQAEQAPNTCECHVCK	P78312	FAM193A	Protein FAM193A	P78312 [391-416]	S(3): 84.8; S(7): 11.7; Y(8): 1.7; T(10): 1.7; T(19): 0.0	P78312 1xPhospho [S393(84.8)]	1	-0.53	0.0526386	-0.24	0.863396	-0.29	0.119601
VYNYNHLMPTRYSVDIPLDK	P61353	RPL27	60S ribosomal protein L27	P61353 [74-93]	Y(2): 0.0; Y(4): 0.0; T(10): 7.6; Y(12): 7.6; S(13): 84.8	P61353 1xPhospho [S86(84.8)]	1	0.55	0.0104228	0.16	0.602197	0.39	0.119816
TSSGDPPSPLVK	Q99618	CDCA3	Cell division cycle-associated protein 3	Q99618 [80-91]	T(1): 33.3; S(2): 33.3; S(3): 33.3; S(8): 0.0		3	0.06	0.782716	0.52	0.0644763	-0.45	0.120462
LSVPYVPQVTDEDRLSR	Q14156	EFR3A	Protein EFR3 homolog A	Q14156 [679-695]	S(2): 0.0; Y(5): 0.0; T(10): 0.2; S(16): 99.8	Q14156 1xPhospho [S694(99.8)]	1	-0.45	0.0638833	0.05	0.799444	-0.48	0.120637
GGPISFSSSR	P35580	MYH10	Myosin-10	P35580 [1931-1940]	S(5): 0.7; S(7): 97.8; S(8): 0.7; S(9): 0.7	P35580 1xPhospho [S1937(97.8)]	1	-0.03	0.901963	-0.6	0.0776219	0.56	0.12078
ITSYFLNEGSQARPR	O75792	RNASEH2A	Ribonuclease H2 subunit A	O75792 [268-282]	T(2): 0.0; S(3): 0.0; Y(4): 0.0; S(10): 100.0	O75792 1xPhospho [S277(100)]	1	-1.24	0.00295349	-0.39	0.209552	-0.86	0.120829
VSQSPSKDSEENPATEERPEK	Q9P2W9	STX18	Syntaxin-18	Q9P2W9 [186-206]	S(2): 1.4; S(4): 97.2; S(6): 1.4; S(9): 0.0; T(15): 0.0	Q9P2W9 1xPhospho [S189(81.2)]	3	1.22	0.00159567	1.57	0.00208702	-0.35	0.121211
IMVHSPTKPASYSVK	Q5VVJ2	MYSM1	Histone H2A deubiquitinase MYSM1	Q5VVJ2 [106-120]	S(5): 99.1; T(7): 0.9; S(11): 0.0; Y(12): 0.0; S(13): 0.0	Q5VVJ2 1xPhospho [S110(99.1)]	1	0.45	0.0548999	-0.06	0.854008	0.5	0.12135
DIIIFVGTPVQK	P46013	MKI67	Antigen KI-67	P46013 [1308-1319]	T(8): 100.0	P46013 1xPhospho [T1315(100)]	1	0.96	0.0343949	0.02	0.994545	0.95	0.121898
ADMTASGSPDYGQPHK	Q01543	FLI1	Friend leukemia integration 1 transcription factor	Q01543 [32-47]	T(4): 33.3; S(6): 33.3; S(8): 33.3; Y(11): 0.0		2	0.37	0.205747	0.88	0.0221045	-0.51	0.12218
VLRNESPPQVPVYNNSHK	Q9UKL3	CASP8AP2	CASP8-associated protein 2	Q9UKL3 [870-887]	S(6): 100.0; Y(13): 0.0; S(16): 0.0	Q9UKL3 1xPhospho [S875(100)]	2	0.75	0.0394565	-0.03	0.956476	0.78	0.122206
ELVPEVPEEQGSKDR	P78559	MAP1A	Microtubule-associated protein 1A	P78559 [594-608]	S(12): 100.0	P78559 1xPhospho [S605(100)]	1	-0.4	0.0757324	0.1	0.747333	-0.51	0.122206
EYIPGQPPLSQSSDSSPTR	P07814	EPRS	Bifunctional glutamate/proline--tRNA ligase	P07814 [871-889]	Y(2): 0.0; S(10): 99.0; S(12): 1.0; S(13): 0.0; S(15): 8.0; S(16): 84.0; T(18): 8.0	P07814 2xPhospho [S880(99.8); S/T/Y]	7	-0.52	0.0388586	0.02	0.962904	-0.55	0.122277
SILSPGGSCGPIK	P78347	GTF2I	General transcription factor II-I	P78347 [207-219]	S(1): 0.0; S(4): 100.0; S(8): 0.0	P78347 1xPhospho [S210(99.8)]	7	0.61	0.00819588	0.19	0.510318	0.43	0.122545
GKASPFEEDQNR	Q8TB72	PUM2	Pumilio homolog 2	Q8TB72 [133-144]	S(4): 100.0	Q8TB72 1xPhospho [S136(100)]	3	0.36	0.121788	0.78	0.016063	-0.41	0.122545
RLSSFVTK	P27708	CAD	CAD protein	P27708 [1404-1411]	S(3): 94.3; S(4): 5.7; T(7): 0.0	P27708 1xPhospho [S1406(94.9)]	3	0.1	0.687989	-0.65	0.152302	0.76	0.122545
AITGASLADIMAK	P83731	RPL24	60S ribosomal protein L24	P83731 [81-93]	T(3): 50.0; S(6): 50.0	P83731 1xPhospho [S86(92.8)]	2	0.79	0.0596766	-0.2	0.830889	0.98	0.122997
SPGSPPGPELPIETALDDRER	Q8TEW0	PARD3	Partitioning defective 3 homolog	Q8TEW0 [692-712]	S(1): 0.2; S(4): 98.4; T(14): 1.4	Q8TEW0 1xPhospho [S695(98.4)]	1	0.17	0.466547	0.63	0.039463	-0.46	0.123257
RADLNQGIGEPQSPSRR	Q96C19	EFHD2	EF-hand domain-containing protein D2	Q96C19 [62-78]	S(13): 100.0; S(15): 0.0	Q96C19 1xPhospho [S74(100)]	4	1.34	0.000549953	0.94	0.029017	0.4	0.123444
LSLSEGGLVPSSKSPKR	Q8WUX9	CHMP7	Charged multivesicular body protein 7	Q8WUX9 [428-444]	S(2): 0.0; S(4): 0.0; S(11): 86.5; S(12): 6.7; S(14): 6.7	Q8WUX9 1xPhospho [S438(86.5)]	3	1.23	0.00245311	0.65	0.173482	0.57	0.123444
ELPSLSPAPDTGLSPSK	Q9UBF8	PI4KB	Phosphatidylinositol 4-kinase beta	Q9UBF8 [253-269]	S(4): 0.0; S(6): 0.0; T(11): 0.0; S(14): 100.0; S(16): 0.0	Q9UBF8 1xPhospho [S258(97.8)]	2	0.66	0.0167283	0.14	0.765444	0.5	0.123444
APVASPAALGSTATASPAAPAR	Q6ZN55	ZNF574	Zinc finger protein 574	Q6ZN55 [713-734]	S(5): 0.0; S(11): 0.0; T(12): 0.0; T(14): 1.8; S(16): 98.2	Q6ZN55 1xPhospho [S728(98.2)]	2	0.61	0.0245273	0.11	0.900854	0.51	0.123444
AAGMSSPGAQSHPEELPR	Q13459	MYO9B	Unconventional myosin-IXb	Q13459 [712-729]	S(5): 50.0; S(6): 50.0; S(11): 0.0		1	0.59	0.0295101	0.03	0.958038	0.56	0.123444
ILSQSTDSLNMR	Q92974	ARHGEF2	Rho guanine nucleotide exchange factor 2	Q92974 [170-181]	S(3): 0.3; S(5): 49.8; T(6): 49.8; S(8): 0.0	Q92974 1xPhospho [S174(92.2)]	4	0.57	0.0165147	0.1	0.760809	0.46	0.123444
VSPPAPGSAPETPEDK	Q13459	MYO9B	Unconventional myosin-IXb	Q13459 [1260-1275]	S(2): 0.0; S(8): 0.0; T(12): 100.0		4	0.39	0.137314	0.85	0.0176892	-0.46	0.123444
GNDTPLALESTNTEKETSLEETK	Q7Z6Z7	HUWE1	E3 ubiquitin-protein ligase HUWE1	Q7Z6Z7 [1719-1741]	T(4): 100.0; S(10): 0.0; T(11): 0.0; T(13): 0.0; T(17): 0.0; S(18): 0.0; T(22): 0.0	Q7Z6Z7 1xPhospho [T1722(100)]	1	0.31	0.0743972	-0.09	0.759607	0.4	0.123444
ASLELKSSIIGK	Q8N6H7	ARFGAP2	ADP-ribosylation factor GTPase-activating protein 2	Q8N6H7 [204-215]	S(2): 0.1; S(7): 9.0; S(8): 90.9	Q8N6H7 1xPhospho [S211(90.9)]	1	0.21	0.440148	-0.51	0.232982	0.71	0.123444
QNGSNDSDRYSDNEEDSKIELK	P42167	TMPO	Lamina-associated polypeptide 2, isoforms beta/gamma	P42167 [174-195]	S(4): 0.0; S(7): 0.0; Y(10): 93.3; S(11): 6.7; S(17): 0.0	P42167 1xPhospho [Y183(88.5)]	2	0.05	0.886593	0.61	0.0774602	-0.55	0.123444
PIMHHPPNQIDDLETQWGVGSSPQRDDLK	O00139	KIF2A	Kinesin-like protein KIF2A	O00139 [565-593]	T(15): 0.0; S(21): 12.8; S(22): 87.2	O00139 1xPhospho [S586(87.2)]	2	-0.08	0.706715	0.37	0.149897	-0.45	0.123444
SLQTLPTDSSTFDTDTFCPPRPKPVAR	Q9NQG6	SMCR7L; MIEF1	Mitochondrial dynamics protein MID51	Q9NQG6 [94-120]	S(1): 85.7; T(4): 14.3; T(7): 0.0; S(9): 0.0; S(10): 0.0; T(11): 0.0; T(14): 0.0; T(16): 0.0	Q9NQG6 1xPhospho [S94(85.7)]	2	-0.18	0.364487	0.25	0.276317	-0.42	0.123444
DSFDDRGPSLNPVLDYDHGSR	P43243	MATR3	Matrin-3	P43243 [187-207]	S(2): 0.0; S(9): 0.0; Y(16): 0.4; S(20): 99.6	P43243 1xPhospho [S206(99.6)]	1	-0.52	0.0403797	0.01	0.954222	-0.53	0.123444
SELTDSASVLDNFK	O43815	STRN	Striatin	O43815 [222-235]	S(1): 93.8; T(4): 5.5; S(6): 0.4; S(8): 0.4	O43815 1xPhospho [S222(93.8)]	2	-0.64	0.00985751	-0.13	0.566872	-0.5	0.123444
QENCGAQQVPAGPGTSTPPSSPVR	Q96G46	DUS3L	tRNA-dihydrouridine(47) synthase [NAD(P)(+)]-like	Q96G46 [257-280]	T(15): 0.0; S(16): 0.0; T(17): 99.9; S(20): 6.0; S(21): 94.1		8	-0.19	0.36349	0.27	0.277926	-0.45	0.123447
VVPGQFDDADSSDSENR	Q9BRS2	RIOK1	Serine/threonine-protein kinase RIO1	Q9BRS2 [11-27]	S(11): 7.0; S(12): 86.0; S(14): 7.0	Q9BRS2 1xPhospho [S22(86)]	1	-0.19	0.609398	0.58	0.17381	-0.77	0.123447
LRLESEGSPETLTNLR	Q9P035	PTPLAD1; HACD3	Very-long-chain (3R)-3-hydroxyacyl-CoA dehydratase 3	Q9P035 [131-146]	S(5): 100.0; S(8): 0.1; T(11): 0.0; T(13): 0.0	Q9P035 1xPhospho [S135(100)]	1	0.57	0.0261629	0.03	0.919366	0.54	0.123674
SMSDVSAEDVQNLR	Q8WWI1	LMO7	LIM domain only protein 7	Q8WWI1 [704-717]	S(1): 50.0; S(3): 50.0; S(6): 0.0		1	-0.02	0.979872	0.87	0.092374	-0.88	0.123674
QSSPSTNAALPGPPAQLMDSSAVPGTALGTEPR	Q9Y4B4	RAD54L2	Helicase ARIP4	Q9Y4B4 [1193-1225]	S(2): 56.7; S(3): 14.4; S(5): 14.4; T(6): 14.4; S(20): 0.0; S(21): 0.0; T(26): 0.0; T(30): 0.0		2	-0.62	0.0482303	0.03	0.905052	-0.65	0.123674
ACIANVEPNQTVEINEQEALEEK	Q9BU64	CENPO	Centromere protein O	Q9BU64 [75-97]	T(11): 100.0	Q9BU64 1xPhospho [T85(100)]	2	-0.07	0.85371	0.45	0.120186	-0.52	0.124041
VPFSPGPAPPPHMGELDQER	Q6Y7W6	GIGYF2	PERQ amino acid-rich with GYF domain-containing protein 2	Q6Y7W6 [590-609]	S(4): 100.0	Q6Y7W6 1xPhospho [S593(100)]	1	0.71	0.0069194	0.26	0.429049	0.46	0.124109
LSSQISAGEEKWNSVSPASAGK	Q86UE4	MTDH	Protein LYRIC	Q86UE4 [293-314]	S(2): 8.4; S(3): 8.4; S(6): 83.3; S(14): 0.0; S(16): 0.0; S(19): 0.0	Q86UE4 1xPhospho [S298(83.3)]	1	0.51	0.0347792	0	0.998898	0.51	0.124109
MSLPLLAGGVADDINTNK	Q15398	DLGAP5	Disks large-associated protein 5	Q15398 [724-741]	S(2): 100.0; T(16): 0.0	Q15398 1xPhospho [S725(100)]	2	0.47	0.0243523	0.06	0.895027	0.42	0.124109
SSSQENLLDEVMK	Q3V6T2	CCDC88A	Girdin	Q3V6T2 [1700-1712]	S(1): 0.2; S(2): 0.2; S(3): 99.7		9	-0.08	0.696862	0.37	0.153504	-0.44	0.124109
SGTNSPPPPFSDWGR	Q9UKT5	FBXO4	F-box only protein 4	Q9UKT5 [8-22]	S(1): 0.0; T(3): 0.9; S(5): 49.6; S(11): 49.6		3	-0.42	0.073839	0.08	0.765788	-0.5	0.124109
VIVGSLSVQDLQASQSACYWLK	Q15043	SLC39A14	Zinc transporter ZIP14	Q15043 [305-326]	S(5): 0.1; S(7): 99.9; S(14): 0.0; S(16): 0.0; Y(19): 0.0	Q15043 1xPhospho [S311(99.9)]	3	-0.63	0.0267447	-0.03	0.922772	-0.6	0.124442
TSGSDDPGICSNTDSTQAQVLLGK	Q8NDI1	EHBP1	EH domain-binding protein 1	Q8NDI1 [663-686]	T(1): 78.6; S(2): 10.7; S(4): 10.7; S(11): 0.0; T(13): 0.0; S(15): 0.0; T(16): 0.0	Q8NDI1 1xPhospho [T663(78.6)]	3	1.88	0.00142196	1.27	0.0937778	0.6	0.124739
ISDAHLADTMIGK	Q9Y657	SPIN1	Spindlin-1	Q9Y657 [123-135]	S(2): 100.0; T(9): 0.0	Q9Y657 1xPhospho [S124(100)]	1	0.46	0.134064	-0.31	0.565577	0.77	0.124739
SLVESVSSSPNK	Q9H2U2	PPA2	Inorganic pyrophosphatase 2, mitochondrial	Q9H2U2 [309-320]	S(1): 0.0; S(5): 0.0; S(7): 0.0; S(8): 0.6; S(9): 99.4	Q9H2U2 1xPhospho [S317(99.4)]	1	-0.25	0.281237	0.26	0.346165	-0.51	0.124739
RVPDPSPVTK	Q9Y4K1	AIM1	Absent in melanoma 1 protein	Q9Y4K1 [136-145]	S(6): 100.0; T(9): 0.0	Q9Y4K1 1xPhospho [S141(100)]	1	0.09	0.722903	-0.58	0.148738	0.67	0.124762
TSNTLEKDLDLLASVPSPSSSGSR	Q8WU79	SMAP2	Stromal membrane-associated protein 2	Q8WU79 [203-226]	T(1): 0.0; S(2): 0.0; T(4): 0.0; S(14): 0.0; S(17): 88.3; S(19): 10.2; S(20): 1.2; S(21): 0.2; S(23): 0.2	Q8WU79 1xPhospho [S219(88.3)]	1	0.39	0.157145	-0.32	0.517474	0.71	0.125235
FGINIPSPEHSNTIDVCNTVDIK	Q9HCI7	MSL2	E3 ubiquitin-protein ligase MSL2	Q9HCI7 [205-227]	S(7): 98.9; S(11): 1.0; T(13): 0.1; T(19): 0.0	Q9HCI7 1xPhospho [S211(98.9)]	3	-0.57	0.162016	0.18	0.509653	-0.75	0.125235
STGVSFWTQDSDENEQEQQSDTEEGSNKK	O14974	PPP1R12A	Protein phosphatase 1 regulatory subunit 12A	O14974 [852-880]	S(1): 0.0; T(2): 0.0; S(5): 0.0; T(8): 0.0; S(11): 0.0; S(20): 99.9; T(22): 0.1; S(26): 0.0		3	-0.65	0.0509103	0.07	0.89596	-0.72	0.125235
TPSEADRWLEEVSK	P49757	NUMB	Protein numb homolog	P49757 [436-449]	T(1): 7.7; S(3): 92.3; S(13): 0.0	P49757 1xPhospho [S438(92.3)]	1	-0.38	0.109739	-1.18	0.0154784	0.81	0.125361
HRGSEEDPLLSPVETWK	Q13017	ARHGAP5	Rho GTPase-activating protein 5	Q13017 [1192-1208]	S(4): 100.0; S(11): 0.0; T(15): 0.0	Q13017 1xPhospho [S1195(100)]	1	0.87	0.00343772	0.43	0.230192	0.44	0.125743
SQGSPMDPMVMK	Q8NFD5	ARID1B	AT-rich interactive domain-containing protein 1B	Q8NFD5 [513-524]	S(1): 50.0; S(4): 50.0		2	0.62	0.0390997	-0.03	0.973594	0.65	0.125743
LFAPQQILQCSPAN	P04183	TK1	Thymidine kinase, cytosolic	P04183 [221-234]	S(11): 100.0	P04183 1xPhospho [S231(100)]	4	0.84	0.00755663	0.31	0.453078	0.54	0.127479
RVLSAPPK	Q86YV0	RASAL3	RAS protein activator like-3	Q86YV0 [69-76]	S(4): 100.0	Q86YV0 1xPhospho [S72(100)]	2	0.75	0.0382641	-0.02	0.983825	0.77	0.127479
GQPEGPLPSSSPRSPSGLRPR	P49815	TSC2	Tuberin	P49815 [1439-1459]	S(9): 56.0; S(10): 56.0; S(11): 40.2; S(14): 43.3; S(16): 4.5		2	0.6	0.0251012	0.06	0.89596	0.53	0.127479
ANTLSPVR	Q9H792	PEAK1	Pseudopodium-enriched atypical kinase 1	Q9H792 [277-284]	T(3): 7.7; S(5): 92.3	Q9H792 1xPhospho [S281(92.3)]	1	0.61	0.00939362	0.2	0.535878	0.41	0.127692
ALLHEGPESPHRPSLIPPVTFEVK	Q92835	INPP5D	Phosphatidylinositol 3,4,5-trisphosphate 5-phosphatase 1	Q92835 [281-304]	S(9): 99.8; S(14): 0.2; T(20): 0.0	Q92835 1xPhospho [S289(99.8)]	1	0.31	0.14622	-0.22	0.548417	0.53	0.127692
APQTSSSPPPVR	Q8IYB3	SRRM1	Serine/arginine repetitive matrix protein 1	Q8IYB3 [690-701]	T(4): 0.0; S(5): 100.0; S(6): 0.1; S(7): 100.0	Q8IYB3 2xPhospho [S696(98.9); S/T]	3	-0.12	0.634169	0.4	0.173508	-0.51	0.127692
RKSELPQDVYTIK	Q14738	PPP2R5D	Serine/threonine-protein phosphatase 2A 56 kDa regulatory subunit delta isoform	Q14738 [571-583]	S(3): 100.0; Y(10): 0.0; T(11): 0.0	Q14738 1xPhospho [S573(100)]	2	-0.27	0.417029	0.4	0.254001	-0.68	0.127692
SSGTNFQGLPSK	Q68EM7	ARHGAP17	Rho GTPase-activating protein 17	Q68EM7 [161-172]	S(1): 0.2; S(2): 0.2; T(4): 99.6; S(11): 0.0	Q68EM7 1xPhospho [T164(99.6)]	3	-0.39	0.183617	0.23	0.477784	-0.62	0.128092
INRLSTPIAGLDNINVFLK	Q8WWI1	LMO7	LIM domain only protein 7	Q8WWI1 [112-130]	S(5): 50.0; T(6): 50.0		4	1.68	0.00142716	2.04	0.00208702	-0.36	0.129056
KIIPTLEEGLQLPSPTATSQLPLESDAVECLNYQHYK	P61978	HNRNPK	Heterogeneous nuclear ribonucleoprotein K	P61978 [103-139]	T(5): 0.0; S(14): 85.0; T(16): 9.7; T(18): 3.6; S(19): 1.4; S(25): 0.1; Y(33): 0.1; Y(36): 0.1	P61978 1xPhospho [S116(85)]	1	0.96	0.00382649	0.48	0.250828	0.49	0.129056
DTCYSPKPSVYLSTPSSASK	Q9Y5K6	CD2AP	CD2-associated protein	Q9Y5K6 [538-557]	T(2): 31.3; Y(4): 31.3; S(5): 31.3; S(9): 5.1; Y(11): 0.9; S(13): 0.0; T(14): 0.0; S(16): 0.0; S(17): 0.0; S(19): 0.0		1	0.68	0.0272404	0.07	0.915803	0.61	0.129056
IIPTLEEGLQLPSPTATSQLPLESDAVECLNYQHYK	P61978	HNRNPK	Heterogeneous nuclear ribonucleoprotein K	P61978 [104-139]	T(4): 0.0; S(13): 84.3; T(15): 13.2; T(17): 2.1; S(18): 0.4; S(24): 0.0; Y(32): 0.0; Y(35): 0.0		17	0.65	0.0160335	0.16	0.730121	0.49	0.129056
SIPQPHQVLGR	Q96DR7	ARHGEF26	Rho guanine nucleotide exchange factor 26	Q96DR7 [22-32]	S(1): 100.0	Q96DR7 1xPhospho [S22(100)]	2	0.35	0.0991514	-0.16	0.684962	0.5	0.129056
RVSGPDPKPGSNCSPAQSVLSEVPSVPTNGMAK	P22314	UBA1	Ubiquitin-like modifier-activating enzyme 1	P22314 [11-43]	S(3): 99.9; S(11): 0.0; S(14): 0.0; S(18): 0.0; S(21): 0.0; S(25): 0.0; T(28): 0.0	P22314 1xPhospho [S13(99.9)]	1	0.01	0.955258	-0.54	0.106049	0.55	0.129208
NLIDSMDQSAFAGFSFVNPK	Q05655	PRKCD	Protein kinase C delta type	Q05655 [650-669]	S(5): 0.0; S(9): 0.0; S(15): 100.0	Q05655 1xPhospho [S664(100)]	1	-0.65	0.0497581	0.13	0.914117	-0.78	0.129607
KSSFANVAAATPAIK	Q9BTC0	DIDO1	Death-inducer obliterator 1	Q9BTC0 [570-584]	S(2): 88.4; S(3): 11.6; T(11): 0.0	Q9BTC0 1xPhospho [S571(88.4)]	1	1.52	0.000190508	1.18	0.00656717	0.33	0.129664
RRPSLLSEFQPGNER	Q9Y618	NCOR2	Nuclear receptor corepressor 2	Q9Y618 [64-78]	S(4): 99.9; S(7): 0.1	Q9Y618 1xPhospho [S67(99.9)]	1	0.96	0.00404561	0.46	0.262095	0.5	0.129664
TASPLPLRPDAPVEKSPEETATQVPSLESLTLK	Q9HCK8	CHD8	Chromodomain-helicase-DNA-binding protein 8	Q9HCK8 [1993-2025]	T(1): 3.9; S(3): 96.1; S(16): 95.3; T(20): 3.9; T(22): 0.8; S(26): 0.0; S(29): 0.0; T(31): 0.0	Q9HCK8 2xPhospho [S1995(96.1); S2008(95.3)]	1	-0.66	0.00650706	-0.17	0.39463	-0.49	0.129753
VIGIECSSISDYAVK	Q99873	PRMT1	Protein arginine N-methyltransferase 1	Q99873 [104-118]	S(7): 50.0; S(8): 50.0; S(10): 0.1; Y(12): 0.0		2	0.2	0.303115	-0.3	0.340221	0.49	0.130291
SPQPPAEEDEDDFDDTLVAIDTYNCDLHFK	Q9BUJ2	HNRNPUL1	Heterogeneous nuclear ribonucleoprotein U-like protein 1	Q9BUJ2 [194-223]	S(1): 100.0; T(16): 0.0; T(22): 0.0; Y(23): 0.0	Q9BUJ2 1xPhospho [S194(100)]	5	-0.39	0.120136	0.17	0.621757	-0.55	0.130291
DGGEALVSPDGTVTEAPR	Q96HN2	AHCYL2	Putative adenosylhomocysteinase 3	Q96HN2 [100-117]	S(8): 100.0; T(12): 0.0; T(14): 0.0	Q96HN2 1xPhospho [S107(100)]	2	0.23	0.573546	-0.93	0.193361	1.16	0.13052
ANLSLLR	P23246	SFPQ	Splicing factor, proline- and glutamine-rich	P23246 [280-286]	S(4): 100.0	P23246 1xPhospho [S283(100)]	1	1.71	0.000116339	1.38	0.00370472	0.33	0.131051
VMVTDADRSILSPGGSCGPIK	P78347	GTF2I	General transcription factor II-I	P78347 [199-219]	T(4): 99.9; S(9): 90.1; S(12): 10.0; S(16): 0.0	P78347 2xPhospho [T202(99.8); S207(90.1)]	1	1.05	0.00968103	0.37	0.534342	0.7	0.131267
TVSFEALPIMR	O15084	ANKRD28	Serine/threonine-protein phosphatase 6 regulatory ankyrin repeat subunit A	O15084 [1009-1019]	T(1): 0.6; S(3): 99.4	O15084 1xPhospho [S1011(99.4)]	1	0.32	0.214595	-0.33	0.439138	0.65	0.131267
TPLSQSMSVLPTSKPEK	Q6WKZ4	RAB11FIP1	Rab11 family-interacting protein 1	Q6WKZ4 [229-245]	T(1): 0.1; S(4): 9.5; S(6): 90.3; S(8): 0.0; T(12): 0.0; S(13): 0.0	Q6WKZ4 1xPhospho [S234(90.3)]	1	0.15	0.453259	0.54	0.0408405	-0.39	0.131267
GAQASPPPIAPYPSPTR	Q14164	IKBKE	Inhibitor of nuclear factor kappa-B kinase subunit epsilon	Q14164 [660-676]	S(5): 100.0; Y(12): 0.0; S(14): 0.0; T(16): 0.0	Q14164 1xPhospho [S664(100)]	1	-0.82	0.0277076	-0.05	0.914603	-0.78	0.131267
LFDTPHTPK	P30291	WEE1	Wee1-like protein kinase	P30291 [184-192]	T(4): 0.0; T(7): 100.0	P30291 1xPhospho [T190(100)]	1	0.8	0.0556788	1.33	0.0107341	-0.54	0.131307
RPTPNDDTLDEGVGLVHSNIATEHIPSPAKK	Q01581	HMGCS1	Hydroxymethylglutaryl-CoA synthase, cytoplasmic	Q01581 [469-499]	T(3): 0.0; T(8): 0.0; S(18): 0.0; T(22): 0.0; S(27): 100.0	Q01581 1xPhospho [S495(99.3)]	3	0.65	0.0162538	0.16	0.72773	0.5	0.131307
RWWAASPAPAR	Q8NC56	LEMD2	LEM domain-containing protein 2	Q8NC56 [161-171]	S(6): 100.0	Q8NC56 1xPhospho [S166(100)]	1	0.47	0.133048	-0.32	0.590261	0.78	0.131307
KTVEDEDQDSEEEKDNDSYIK	Q9Y5T5	USP16	Ubiquitin carboxyl-terminal hydrolase 16	Q9Y5T5 [406-426]	T(2): 0.0; S(10): 47.0; S(18): 47.0; Y(19): 6.0		1	0.35	0.135294	0.76	0.0184983	-0.39	0.131307
VQAYEEPSVASSPNGK	Q99575	POP1	Ribonucleases P/MRP protein subunit POP1	Q99575 [719-734]	Y(4): 0.0; S(8): 0.0; S(11): 50.0; S(12): 50.0		2	0	0.978618	0.5	0.0975935	-0.49	0.131307
ISLCMPESQQQNTPPKSEK	Q15652	JMJD1C	Probable JmjC domain-containing histone demethylation protein 2C	Q15652 [1966-1984]	S(2): 0.0; S(8): 0.2; T(13): 99.6; S(17): 0.2	Q15652 1xPhospho [T1978(99.6)]	1	-0.06	0.78785	0.34	0.140787	-0.4	0.131307
LLGPNASPDGLIPWTR	P42224	STAT1	Signal transducer and activator of transcription 1-alpha/beta	P42224 [526-541]	S(7): 100.0; T(15): 0.0	P42224 1xPhospho [S532(100)]	1	-0.56	0.0852153	0.12	0.745606	-0.67	0.131307
GGITQPNINDSLEITK	P30260	CDC27	Cell division cycle protein 27 homolog	P30260 [416-431]	T(4): 0.0; S(11): 100.0; T(15): 0.0	P30260 1xPhospho [S426(100)]	1	1.03	0.0137311	0.31	0.660665	0.73	0.131841
IVTVAAISQDSNPATPNVSTNMEEF	Q02446	SP4	Transcription factor Sp4	Q02446 [760-784]	T(3): 0.0; S(8): 0.4; S(11): 2.1; T(15): 96.8; S(19): 0.4; T(20): 0.4	Q02446 1xPhospho [S770(96.2)]	3	-0.49	0.0610753	0.02	0.858157	-0.53	0.131916
ITESSLVEITEHK	Q99590	SCAF11	Protein SCAF11	Q99590 [584-596]	T(2): 3.0; S(4): 48.5; S(5): 48.5; T(10): 0.0	Q99590 1xPhospho [S588(93.2)]	4	1.17	0.000403838	0.84	0.0183247	0.33	0.131963
TTNPFYNTM	Q76I76	SSH2	Protein phosphatase Slingshot homolog 2	Q76I76 [1415-1423]	T(1): 0.0; T(2): 0.0; Y(6): 0.0; T(8): 100.0	Q76I76 1xPhospho [T1422(100)]	2	-0.56	0.0302771	-0.06	0.937188	-0.5	0.132379
SLLFGAMSEMISPSEK	Q7Z2Z1	TICRR	Treslin	Q7Z2Z1 [1067-1082]	S(1): 0.0; S(8): 0.0; S(12): 100.0; S(14): 0.0	Q7Z2Z1 1xPhospho [S1078(100)]	2	0.62	0.00841235	0.28	0.481227	0.33	0.132494
TNSMSSSGLGSPNR	Q9NZN8	CNOT2	CCR4-NOT transcription complex subunit 2	Q9NZN8 [155-168]	T(1): 0.0; S(3): 0.0; S(5): 0.2; S(6): 0.2; S(7): 0.2; S(11): 99.4	Q9NZN8 1xPhospho [S165(99.4)]	1	-0.27	0.280925	0.24	0.366394	-0.51	0.132494
TTPPTQKPPSPPMSGK	Q9NYB9	ABI2	Abl interactor 2	Q9NYB9 [174-189]	T(1): 0.0; T(2): 0.0; T(5): 0.0; S(10): 100.0; S(14): 0.0	Q9NYB9 1xPhospho [S183(100)]	2	-0.57	0.0345897	-0.01	0.973775	-0.55	0.132494
RKSDGIYIINLK	P08865	RPSA	40S ribosomal protein SA	P08865 [41-52]	S(3): 100.0; Y(7): 0.0	P08865 1xPhospho [S43(100)]	1	1.05	0.0168293	0.24	0.735904	0.8	0.132638
TSPASLDFPESQK	Q96JM3	CHAMP1	Chromosome alignment-maintaining phosphoprotein 1	Q96JM3 [458-470]	T(1): 4.4; S(2): 95.3; S(5): 0.2; S(11): 0.0	Q96JM3 1xPhospho [S459(95.3)]	3	0.49	0.120228	1	0.0174817	-0.51	0.132638
NMFLVGEGDSVITQVLNKSLAEQR	O75475	PSIP1	PC4 and SFRS1-interacting protein	O75475 [425-448]	S(10): 0.0; T(13): 0.0; S(19): 100.0	O75475 1xPhospho [S443(100)]	3	1.81	0.00122804	1.19	0.0738648	0.6	0.132928
NCPHVVVGTPGR	O00148	DDX39A	ATP-dependent RNA helicase DDX39A	O00148 [163-174]	T(9): 100.0	O00148 1xPhospho [T171(100)]	2	0.25	0.24724	-0.28	0.404549	0.53	0.133008
VMTIPYQPMPASSPVICAGGQDR	Q15365	PCBP1	Poly(rC)-binding protein 1	Q15365 [178-200]	T(3): 0.0; Y(6): 0.0; S(12): 8.8; S(13): 91.2	Q15365 1xPhospho [S190(91.2)]	5	0.29	0.124617	-0.17	0.621263	0.46	0.133248
TRSLHGPCPVTTFGPK	O95544	NADK	NAD kinase	O95544 [62-77]	T(1): 1.3; S(3): 98.6; T(11): 0.0; T(12): 0.0	O95544 1xPhospho [S64(98.6)]	2	0.24	0.449293	-0.63	0.249074	0.87	0.13346
SGSPSDNSGAEEMEVSLAKPK	P31749	AKT1	RAC-alpha serine/threonine-protein kinase	P31749 [122-142]	S(1): 15.3; S(3): 91.3; S(5): 84.8; S(8): 8.7; S(16): 0.0	P31749 2xPhospho [S124(91.3); S126(84.8)]	4	-0.22	0.387807	0.31	0.285385	-0.52	0.133819
QSIINPDWNFEK	P46459	NSF	Vesicle-fusing ATPase	P46459 [206-217]	S(2): 100.0	P46459 1xPhospho [S207(100)]	1	0.87	0.110199	1.59	0.0164594	-0.71	0.134814
TNPPGGKGSGIFDESTPVQTR	Q9H910	HN1L	Hematological and neurological expressed 1-like protein	Q9H910 [61-81]	T(1): 0.0; S(9): 100.0; S(15): 0.0; T(16): 0.0; T(20): 0.0	Q9H910 1xPhospho [S69(100)]	1	-0.76	0.0396537	0.01	0.992784	-0.76	0.134814
DNTRPGANSPEMWSEAIK	Q92499	DDX1	ATP-dependent RNA helicase DDX1	Q92499 [473-490]	T(3): 0.0; S(9): 100.0; S(14): 0.0	Q92499 1xPhospho [S481(100)]	1	-0.34	0.118013	0.14	0.643308	-0.48	0.135043
LQQQAALSPTTAPAVSSVSK	Q8WXI9	GATAD2B	Transcriptional repressor p66-beta	Q8WXI9 [479-498]	S(8): 99.8; T(10): 0.2; T(11): 0.0; S(16): 0.0; S(17): 0.0; S(19): 0.0	Q8WXI9 1xPhospho [S486(99.8)]	1	0.37	0.0446358	0.01	0.962686	0.37	0.135098
RRTPSPPPR	Q8IYB3	SRRM1	Serine/arginine repetitive matrix protein 1	Q8IYB3 [579-587]	T(3): 100.0; S(5): 100.0	Q8IYB3 2xPhospho [T581(100); S583(100)]	2	0.08	0.750422	0.51	0.0690699	-0.43	0.135416
DISPEKSELDLGEPGPPGVEPPPQLLDIQCK	Q5VUA4	ZNF318	Zinc finger protein 318	Q5VUA4 [1711-1741]	S(3): 50.0; S(7): 50.0		1	-0.14	0.512603	0.29	0.224256	-0.42	0.135626
TTTSPFFSEDTFR	Q17R98	ZNF827	Zinc finger protein 827	Q17R98 [757-769]	T(1): 82.8; T(2): 5.8; T(3): 5.8; S(4): 5.8; S(8): 0.0; T(11): 0.0	Q17R98 1xPhospho [T757(82.8)]	2	-0.39	0.0531566	0	0.913497	-0.41	0.135644
SEPVINNDNPLESNDEKEGQEATCSRPQIVPEPMDFR	P23497	SP100	Nuclear autoantigen Sp-100	P23497 [350-386]	S(1): 0.0; S(13): 100.0; T(23): 0.0; S(25): 0.0	P23497 1xPhospho [S362(100)]	1	0.25	0.257472	0.68	0.0276198	-0.43	0.135772
EVSSRPSTPGLSVVSGISATSEDIPNKIEDLR	Q14C86	GAPVD1	GTPase-activating protein and VPS9 domain-containing protein 1	Q14C86 [755-786]	S(3): 2.2; S(4): 9.5; S(7): 43.0; T(8): 43.0; S(12): 2.2; S(15): 0.0; S(18): 0.0; T(20): 0.0; S(21): 0.0		1	-0.09	0.606467	-0.55	0.0550163	0.46	0.136185
RQDSDLVQCGVTSPSSAEATGK	Q9HC52	CBX8	Chromobox protein homolog 8	Q9HC52 [253-274]	S(4): 100.0; T(12): 0.0; S(13): 0.0; S(15): 0.0; S(16): 0.0; T(20): 0.0		2	1.31	0.00135866	0.8	0.0811722	0.5	0.136361
ALAAGADSPKTEEARPSPAPGPGTPTGTPTR	Q4KMP7	TBC1D10B	TBC1 domain family member 10B	Q4KMP7 [125-155]	S(8): 1.2; T(11): 0.3; S(17): 98.6; T(24): 93.5; T(26): 4.4; T(28): 1.1; T(30): 1.1	Q4KMP7 2xPhospho [S141(83.8); T/S]	2	-0.29	0.160122	0.12	0.54608	-0.4	0.136411
AALDGGVASAASPESKPSPGTK	Q9Y4K1	AIM1	Absent in melanoma 1 protein	Q9Y4K1 [64-85]	S(9): 0.0; S(12): 99.9; S(15): 0.1; S(18): 99.0; T(21): 1.1	Q9Y4K1 2xPhospho [S75(97.6); T84(87)]	3	1.27	0.00307777	0.7	0.191959	0.57	0.136665
FKNEDLTDELSLNK	P33981	TTK	Dual specificity protein kinase TTK	P33981 [27-40]	T(7): 100.0; S(11): 0.0	P33981 1xPhospho [T33(100)]	2	0.79	0.0505318	-0.07	0.930269	0.86	0.136665
LRLPSPSMDK	Q9NQ86	TRIM36	E3 ubiquitin-protein ligase TRIM36	Q9NQ86 [83-92]	S(5): 100.0; S(7): 0.0	Q9NQ86 1xPhospho [S87(100)]	1	0.53	0.0184446	0.1	0.756021	0.43	0.136665
QLGDFFGMSNSYAECYPATMDDMAVDSDEEVDYSK	Q13123	IK	Protein Red	Q13123 [434-468]	S(9): 0.0; S(11): 0.0; Y(12): 0.0; Y(16): 0.0; T(19): 0.1; S(27): 99.9; Y(33): 0.0; S(34): 0.0	Q13123 1xPhospho [S460(99.4)]	2	0.15	0.52523	0.61	0.0484416	-0.46	0.136665
IPMTPTSSFVSPPPPTASPHSNR	Q7Z5L9	IRF2BP2	Interferon regulatory factor 2-binding protein 2	Q7Z5L9 [389-411]	T(4): 0.0; T(6): 0.0; S(7): 0.0; S(8): 0.0; S(11): 0.0; T(16): 12.2; S(18): 86.0; S(21): 1.8	Q7Z5L9 1xPhospho [S406(86)]	1	-0.08	0.836983	0.6	0.135488	-0.67	0.136665
RTDALTSSPGR	P49736	MCM2	DNA replication licensing factor MCM2	P49736 [34-44]	T(2): 0.0; T(6): 0.1; S(7): 0.7; S(8): 99.3	P49736 1xPhospho [S41(99.3)]	1	-0.13	0.639669	0.41	0.18304	-0.54	0.136665
SPGYESESSRYESQNTELK	Q9H5H4	ZNF768	Zinc finger protein 768	Q9H5H4 [139-157]	S(1): 100.0; Y(4): 0.1; S(6): 8.0; S(8): 8.0; S(9): 75.8; Y(11): 8.0; S(13): 0.0; T(16): 0.0	Q9H5H4 2xPhospho [S139(100); S147(75.8)]	1	-0.08	0.857988	0.58	0.131486	-0.66	0.136994
KNLSPGAVESDVR	P53621	COPA	Coatomer subunit alpha	P53621 [170-182]	S(4): 100.0; S(10): 0.0	P53621 1xPhospho [S173(100)]	1	0.99	0.0213534	0.21	0.807008	0.77	0.137079
YKENPDIVNQSQQAQAR	O95376	ARIH2	E3 ubiquitin-protein ligase ARIH2	O95376 [343-359]	Y(1): 0.0; S(11): 100.0	O95376 1xPhospho [S353(100)]	1	1.4	0.00040731	1.69	0.00105352	-0.29	0.137214
RKSLSDSESDDSK	Q13185	CBX3; C15orf57	Chromobox protein homolog 3	Q13185 [91-103]	S(3): 99.3; S(5): 0.7; S(7): 0.1; S(9): 0.0; S(12): 0.0	Q13185 1xPhospho [S93(99.3)]	1	1.23	0.000912482	0.81	0.0501665	0.41	0.137214
GSPLNAAPYGIESMSQDTEVR	P18031	PTPN1	Tyrosine-protein phosphatase non-receptor type 1	P18031 [351-371]	S(2): 99.1; Y(9): 0.9; S(13): 0.0; S(15): 0.0; T(18): 0.0	P18031 1xPhospho [S352(99.1)]	1	0.56	0.0590833	-0.09	0.884984	0.64	0.137214
VNQSALEAVTPSPSFQQR	Q9UKG1	APPL1	DCC-interacting protein 13-alpha	Q9UKG1 [390-407]	S(4): 0.0; T(10): 0.0; S(12): 0.3; S(14): 99.7	Q9UKG1 1xPhospho [S403(99.7)]	2	0.25	0.302685	-0.39	0.358587	0.63	0.137214
YETPSDAIEVISPASSPAPPQEK	O75376	NCOR1	Nuclear receptor corepressor 1	O75376 [1966-1988]	Y(1): 0.0; T(3): 0.0; S(5): 0.0; S(12): 100.0; S(15): 6.2; S(16): 93.9	O75376 2xPhospho [S1977(100); S1981(99)]	6	-0.28	0.160986	0.17	0.548842	-0.45	0.137214
RSDSMTFLGCIPPNPFEVPLAEAIPLADQPHLLQPNAR	O95071	UBR5	E3 ubiquitin-protein ligase UBR5	O95071 [2025-2062]	S(2): 2.6; S(4): 14.5; T(6): 82.9	O95071 1xPhospho [T2030(82.9)]	4	-0.45	0.0555135	-1.19	0.0111258	0.75	0.137214
YSPPAISPLVSEK	Q14694	USP10	Ubiquitin carboxyl-terminal hydrolase 10	Q14694 [364-376]	Y(1): 0.0; S(2): 0.0; S(7): 100.0; S(11): 0.0	Q14694 1xPhospho [S370(99.5)]	7	0.35	0.0781262	-0.09	0.793229	0.45	0.137259
SPQTLAPVGEDAMK	Q92797	SYMPK	Symplekin	Q92797 [1243-1256]	S(1): 97.0; T(4): 3.1	Q92797 1xPhospho [S1243(97)]	2	-0.33	0.182073	0.18	0.511666	-0.5	0.137259
ENSREALAEAALESPR	O14745	SLC9A3R1	Na(+)/H(+) exchange regulatory cofactor NHE-RF1	O14745 [267-282]	S(3): 100.0; S(14): 0.0	O14745 1xPhospho [S269(100)]	1	-0.45	0.119373	0.14	0.650151	-0.6	0.137259
ATSTSDMLLK	Q9NW64	RBM22	Pre-mRNA-splicing factor RBM22	Q9NW64 [140-149]	T(2): 0.0; S(3): 0.0; T(4): 99.9; S(5): 0.1	Q9NW64 1xPhospho [T143(99.8)]	2	1.14	0.0110303	0.41	0.55659	0.72	0.137559
ILVSIGESFGTSEK	P06400	RB1	Retinoblastoma-associated protein	P06400 [831-844]	S(4): 0.0; S(8): 0.0; T(11): 99.4; S(12): 0.6	P06400 1xPhospho [T841(99.5)]	9	0.97	0.00174961	0.57	0.107059	0.4	0.137559
KTSIDPSPESHEVMER	Q562F6	SGOL2	Shugoshin-like 2	Q562F6 [1083-1098]	T(2): 6.1; S(3): 93.9; S(7): 0.0; S(10): 0.0	Q562F6 1xPhospho [S1085(93.9)]	2	0.94	0.0846234	-0.4	0.766982	1.32	0.137559
IFYPEIEEVQALDDTERGSGGFGSTGKN	P33316	DUT	Deoxyuridine 5'-triphosphate nucleotidohydrolase, mitochondrial	P33316 [225-252]	Y(3): 0.0; T(15): 0.3; S(19): 99.7; S(24): 0.0; T(25): 0.0	P33316 1xPhospho [S243(99.7)]	1	0.93	0.00788559	0.35	0.437659	0.59	0.137559
NIEEHASADVEK	P61006	RAB8A	Ras-related protein Rab-8A	P61006 [105-116]	S(7): 100.0	P61006 1xPhospho [S111(100)]	1	0.17	0.359921	0.53	0.0355148	-0.36	0.137559
SPGNTSQPPAFFSK	Q9Y618	NCOR2	Nuclear receptor corepressor 2	Q9Y618 [2269-2282]	S(1): 0.3; T(5): 94.3; S(6): 5.3; S(13): 0.0	Q9Y618 1xPhospho [T2273(94.3)]	4	-0.25	0.173844	0.15	0.52657	-0.4	0.137559
MKPAGSVNDMALDAFDLDR	Q9UI08	EVL	Ena/VASP-like protein	Q9UI08 [364-382]	S(6): 100.0	Q9UI08 1xPhospho [S369(100)]	6	-0.45	0.0455344	0.01	0.965065	-0.45	0.137559
SLQTLPTDSSTFDTDTFCPPRPK	Q9NQG6	SMCR7L; MIEF1	Mitochondrial dynamics protein MID51	Q9NQG6 [94-116]	S(1): 98.5; T(4): 1.5; T(7): 0.0; S(9): 0.0; S(10): 0.0; T(11): 0.0; T(14): 0.0; T(16): 0.0	Q9NQG6 1xPhospho [S94(98.5)]	1	-0.24	0.378614	0.34	0.300192	-0.57	0.137655
VDVSCEPLEGVEK	Q12888	TP53BP1	Tumor suppressor p53-binding protein 1	Q12888 [768-780]	S(4): 100.0	Q12888 1xPhospho [S771(100)]	1	1.46	0.000343825	1.1	0.0141206	0.36	0.138197
VSPRPSPTQQPR	Q96BF3	TMIGD2	Transmembrane and immunoglobulin domain-containing protein 2	Q96BF3 [261-272]	S(2): 0.0; S(6): 99.0; T(8): 1.0	Q96BF3 1xPhospho [S266(99)]	1	-1.03	0.0153676	-0.11	0.677694	-0.93	0.138263
KNDMDEPPPLDYGSGEDDGK	Q12873	CHD3	Chromodomain-helicase-DNA-binding protein 3	Q12873 [584-603]	Y(12): 7.5; S(14): 92.5	Q12873 1xPhospho [S597(92.5)]	5	0	0.987059	0.48	0.104153	-0.47	0.138297
IYISNTFSPSK	Q92925	SMARCD2	SWI/SNF-related matrix-associated actin-dependent regulator of chromatin subfamily D member 2	Q92925 [196-206]	Y(2): 0.0; S(4): 0.0; T(6): 0.0; S(8): 100.0; S(10): 0.0	Q92925 1xPhospho [S203(100)]	1	-0.35	0.113833	0.13	0.674186	-0.49	0.138382
TTPPTQKPPSPPMSGK	Q9NYB9	ABI2	Abl interactor 2	Q9NYB9 [174-189]	T(1): 0.0; T(2): 0.0; T(5): 0.0; S(10): 100.0; S(14): 0.0	Q9NYB9 1xPhospho [S183(100)]	4	-0.57	0.0496385	0.03	0.942674	-0.6	0.138398
RHPTGTTPPVK	Q96ST3	SIN3A	Paired amphipathic helix protein Sin3a	Q96ST3 [429-439]	T(4): 1.3; T(6): 10.2; T(7): 88.5	Q96ST3 1xPhospho [T435(88.5)]	1	1.61	0.00163663	1.03	0.0982435	0.58	0.138501
KLESSEENLSSEDEELPCFQHLLFGK	P38398	BRCA1	Breast cancer type 1 susceptibility protein	P38398 [1208-1233]	S(4): 0.0; S(5): 0.0; S(10): 100.0; S(11): 100.0	P38398 2xPhospho [S1217(100); S1218(100)]	2	-0.68	0.00628468	-0.22	0.357123	-0.47	0.13853
YNVSTTPYLQSVK	Q8WWK9	CKAP2	Cytoskeleton-associated protein 2	Q8WWK9 [592-604]	Y(1): 99.1; S(4): 0.8; T(5): 0.0; T(6): 0.1; Y(8): 0.0; S(11): 100.0	Q8WWK9 2xPhospho [Y592(99.1); S602(100)]	1	-0.01	0.932668	-0.52	0.0961684	0.5	0.139116
SGELGLPGAPESSTASAPGEPSPPSPPCR	Q5QP82	DCAF10	DDB1- and CUL4-associated factor 10	Q5QP82 [68-96]	S(1): 0.0; S(12): 0.0; S(13): 0.0; T(14): 0.0; S(16): 0.0; S(22): 1.4; S(25): 98.6	Q5QP82 1xPhospho [S92(98.6)]	3	-0.32	0.142883	0.15	0.597665	-0.47	0.139116
RVALSDDETK	Q15054	POLD3	DNA polymerase delta subunit 3	Q15054 [303-312]	S(5): 94.4; T(9): 5.6	Q15054 1xPhospho [S307(94.4)]	1	-0.16	0.382152	0.22	0.301251	-0.38	0.139336
SVSDQFYR	P55010	EIF5	Eukaryotic translation initiation factor 5	P55010 [8-15]	S(1): 8.4; S(3): 91.6; Y(7): 0.0	P55010 1xPhospho [S10(91.6)]	1	1.34	0.00788559	0.59	0.431642	0.75	0.139399
LDQPGNLPGSNRR	P46013	MKI67	Antigen KI-67	P46013 [1806-1818]	S(10): 100.0	P46013 1xPhospho [S1815(100)]	2	1.06	0.0159765	0.34	0.690801	0.72	0.139399
SKAPGSPLSSEGAAGEGVR	Q6JBY9	RCSD1	CapZ-interacting protein	Q6JBY9 [211-229]	S(1): 0.0; S(6): 100.0; S(9): 0.0; S(10): 0.0	Q6JBY9 1xPhospho [S216(100)]	7	-0.01	0.966548	0.38	0.113479	-0.39	0.139399
CALSSPSLAFTPPIK	Q8NFH5	NUP35	Nucleoporin NUP53	Q8NFH5 [255-269]	S(4): 33.3; S(5): 33.3; S(7): 33.3; T(11): 100.0	Q8NFH5 2xPhospho [T265(100); S]	7	1.4	0.00121481	0.95	0.0683187	0.45	0.140234
RQPSMSETMPLYTLCK	Q9Y5B0	CTDP1	RNA polymerase II subunit A C-terminal domain phosphatase	Q9Y5B0 [836-851]	S(4): 98.9; S(6): 1.0; T(8): 0.1; Y(12): 0.0; T(13): 0.0	Q9Y5B0 1xPhospho [S839(98.9)]	1	0.95	0.0188816	0.2	0.750701	0.75	0.140234
SLPGPAPCLK	Q01433	AMPD2	AMP deaminase 2	Q01433 [100-109]	S(1): 100.0	Q01433 1xPhospho [S100(100)]	3	1.17	0.0505492	-0.12	0.944299	1.28	0.140494
AFMESPKQILDSAASLTGSK	P46013	MKI67	Antigen KI-67	P46013 [1675-1694]	S(5): 100.0; S(12): 0.0; S(15): 0.0; T(17): 0.0; S(19): 0.0	P46013 1xPhospho [S1679(100)]	1	0.79	0.0488496	-0.03	0.953839	0.83	0.140494
IVAHAVEVPAVQSPR	Q96FF9	CDCA5	Sororin	Q96FF9 [63-77]	S(13): 100.0	Q96FF9 1xPhospho [S75(100)]	1	0.41	0.0666815	-0.07	0.861364	0.48	0.140494
SISVDLAESK	Q9H410	DSN1	Kinetochore-associated protein DSN1 homolog	Q9H410 [123-132]	S(1): 94.5; S(3): 5.5; S(9): 0.0	Q9H410 1xPhospho [S123(94.5)]	2	0.36	0.19993	-0.36	0.492624	0.7	0.140494
RGLGAGAGAGEESPATSLPR	O15173	PGRMC2	Membrane-associated progesterone receptor component 2	O15173 [78-97]	S(13): 99.4; T(16): 0.6; S(17): 0.1	O15173 1xPhospho [S90(99.4)]	1	0.11	0.564114	-0.41	0.214139	0.52	0.140494
SPVVELSK	P25098	ADRBK1	Beta-adrenergic receptor kinase 1	P25098 [670-677]	S(1): 100.0; S(7): 0.0	P25098 1xPhospho [S670(100)]	1	-0.15	0.487479	0.29	0.245877	-0.44	0.140494
SPFEIISPPASPPEMVGQR	P78559	MAP1A	Microtubule-associated protein 1A	P78559 [1791-1809]	S(1): 0.0; S(7): 100.0; S(11): 100.0	P78559 2xPhospho [S1797(99.8); S1801(100)]	10	-0.51	0.0231001	-0.05	0.820067	-0.47	0.140494
MESSFGSPSKQESSESLPK	Q6VMQ6	ATF7IP	Activating transcription factor 7-interacting protein 1	Q6VMQ6 [471-489]	S(3): 47.0; S(4): 0.6; S(7): 47.0; S(9): 5.3; S(13): 0.0; S(14): 0.0; S(16): 0.0		2	-1.19	0.00175408	-0.47	0.104786	-0.73	0.140494
LLESPGVEAGEGEAEKEEAGAQGRPLR	Q6NYC8	PPP1R18	Phostensin	Q6NYC8 [365-391]	S(4): 100.0	Q6NYC8 1xPhospho [S368(100)]	1	0.63	0.0392668	-0.05	0.9848	0.68	0.140672
KTVFSPTLPAAR	Q7Z2W4	ZC3HAV1	Zinc finger CCCH-type antiviral protein 1	Q7Z2W4 [374-385]	T(2): 0.0; S(5): 0.6; T(7): 99.4	Q7Z2W4 1xPhospho [T380(99.4)]	1	0.12	0.558522	-0.44	0.217091	0.56	0.140672
TSSAFVGKTPEASPEPK	Q99460	PSMD1	26S proteasome non-ATPase regulatory subunit 1	Q99460 [303-319]	T(1): 0.0; S(2): 0.0; S(3): 0.0; T(9): 100.0; S(13): 100.0	Q99460 2xPhospho [T311(100); S315(100)]	1	-0.42	0.115223	0.15	0.678434	-0.57	0.140672
NHLSPQQGGATPQVPSPCCR	Q9H4L4	SENP3	Sentrin-specific protease 3	Q9H4L4 [166-185]	S(4): 100.0; T(11): 0.0; S(16): 0.0	Q9H4L4 1xPhospho [S169(100)]	5	-0.52	0.069098	0.08	0.850988	-0.6	0.140672
TSEIEPKNSPEDLGLSLTGDSCK	Q12888	TP53BP1	Tumor suppressor p53-binding protein 1	Q12888 [492-514]	T(1): 0.0; S(2): 0.0; S(9): 100.0; S(16): 0.0; T(18): 0.0; S(21): 0.0	Q12888 1xPhospho [S500(100)]	1	-0.82	0.0026904	-0.31	0.164725	-0.51	0.140672
RSSLYGIAK	Q5VZ89	DENND4C	DENN domain-containing protein 4C	Q5VZ89 [946-954]	S(2): 0.2; S(3): 96.1; Y(5): 3.7	Q5VZ89 1xPhospho [S948(96.1)]	1	1.15	0.000602026	0.75	0.0284121	0.4	0.141095
SGLEELVLSEMNSPSR	Q4V328	GRIPAP1	GRIP1-associated protein 1	Q4V328 [643-658]	S(1): 0.0; S(9): 0.0; S(13): 50.0; S(15): 50.0		1	1.37	0.0101028	0.54	0.512866	0.83	0.14129
SFAGNLNTYK	Q01813	PFKP	ATP-dependent 6-phosphofructokinase, platelet type	Q01813 [386-395]	S(1): 100.0; T(8): 0.0; Y(9): 0.0	Q01813 1xPhospho [S386(100)]	2	-0.22	0.308401	0.19	0.365911	-0.41	0.14129
ESLPVSGEESQLTPEKSPK	Q9UKA4	AKAP11	A-kinase anchor protein 11	Q9UKA4 [969-987]	S(2): 0.0; S(6): 0.0; S(10): 0.0; T(13): 100.0; S(17): 0.0	Q9UKA4 1xPhospho [T981(100)]	2	0.33	0.160858	0.75	0.021862	-0.42	0.141398
KLSVPTSDEEDEVPAPKPR	Q8NE71	ABCF1	ATP-binding cassette sub-family F member 1	Q8NE71 [103-121]	S(3): 0.0; T(6): 50.0; S(7): 50.0		3	-0.2	0.369766	0.26	0.315962	-0.45	0.141398
RASGQAFELILSPR	P16949	STMN1	Stathmin	P16949 [14-27]	S(3): 100.0; S(12): 0.0	P16949 1xPhospho [S16(100)]	46	1.7	0.000113007	1.38	0.00335394	0.31	0.141517
LWTSASDQQMTEFSNPSPSTSISAEGK	Q9BTX1	NDC1; TMEM48	Nucleoporin NDC1	Q9BTX1 [484-510]	T(3): 0.0; S(4): 0.0; S(6): 0.0; T(11): 0.0; S(14): 0.0; S(17): 9.6; S(19): 79.5; T(20): 9.6; S(21): 1.2; S(23): 0.2	Q9BTX1 1xPhospho [S502(90.7)]	5	0.24	0.533588	0.86	0.0512994	-0.63	0.141925
ALQSPALGLR	P46940	IQGAP1	Ras GTPase-activating-like protein IQGAP1	P46940 [327-336]	S(4): 100.0	P46940 1xPhospho [S330(100)]	1	0.39	0.0374276	0.02	0.965433	0.36	0.142465
SGTAETEPVEQDSSQPSLPLVR	Q12888	TP53BP1	Tumor suppressor p53-binding protein 1	Q12888 [818-839]	S(1): 0.0; T(3): 0.0; T(6): 0.0; S(13): 0.1; S(14): 99.9; S(17): 0.0	Q12888 1xPhospho [S831(99.9)]	1	0.18	0.390857	0.58	0.0396485	-0.4	0.142465
ATHPPPASPSSLVK	O43566	RGS14	Regulator of G-protein signaling 14	O43566 [471-484]	T(2): 0.0; S(8): 100.0; S(10): 0.0; S(11): 0.0	O43566 1xPhospho [S478(100)]	2	-0.17	0.340985	-0.62	0.0353728	0.46	0.142465
HGSGPNIILTGDSSPGFSK	Q53ET0	CRTC2	CREB-regulated transcription coactivator 2	Q53ET0 [611-629]	S(3): 100.0; T(10): 0.0; S(13): 0.0; S(14): 0.0; S(18): 0.0	Q53ET0 1xPhospho [S613(100)]	1	-0.87	0.0101739	-0.19	0.511688	-0.68	0.142465
KFVDKYSISLSPPEQQK	Q15057	ACAP2	Arf-GAP with coiled-coil, ANK repeat and PH domain-containing protein 2	Q15057 [511-527]	Y(6): 0.0; S(7): 0.0; S(9): 1.0; S(11): 99.0	Q15057 1xPhospho [S521(99)]	1	-1.24	0.00050691	-0.64	0.0234811	-0.6	0.142465
GLPAPGPSPADKK	P42768	WAS	Wiskott-Aldrich syndrome protein	P42768 [214-226]	S(8): 100.0	P42768 1xPhospho [S221(100)]	1	1.61	0.00222658	1	0.132281	0.62	0.143086
LPDLSPVENK	Q9Y520	PRRC2C	Protein PRRC2C	Q9Y520 [2101-2110]	S(5): 100.0	Q9Y520 1xPhospho [S2105(100)]	1	0.67	0.00719322	0.27	0.385941	0.4	0.143086
EELSHSPEPCTK	P41229	KDM5C	Lysine-specific demethylase 5C	P41229 [296-307]	S(4): 0.0; S(6): 100.0; T(11): 0.0	P41229 1xPhospho [S301(100)]	2	0.25	0.295311	0.66	0.032039	-0.41	0.143086
IQALQTACPDLQLSAASVGNCPTK	Q15154	PCM1	Pericentriolar material 1 protein	Q15154 [763-786]	T(6): 0.0; S(14): 0.0; S(17): 100.0; T(23): 0.0	Q15154 1xPhospho [S779(100)]	1	-0.11	0.757427	0.53	0.163349	-0.64	0.143086
KTPESFLGPNAALVDLDSLVSR	Q9Y6I3	EPN1	Epsin-1	Q9Y6I3 [469-490]	T(2): 89.1; S(5): 10.9; S(18): 0.0; S(21): 0.0	Q9Y6I3 1xPhospho [T470(89.1)]	1	-0.27	0.310606	0.22	0.369681	-0.49	0.144002
WRLSPGETPER	Q6NYC8	PPP1R18	Phostensin	Q6NYC8 [192-202]	S(4): 100.0; T(8): 0.0	Q6NYC8 1xPhospho [S195(100)]	1	1.11	0.00165928	0.61	0.095111	0.5	0.145252
YETSLLDLVQSLSPNSAPKPQR	Q86T90	KIAA1328	Uncharacterized protein KIAA1328	Q86T90 [509-530]	Y(1): 0.0; T(3): 0.0; S(4): 0.0; S(11): 0.1; S(13): 98.9; S(16): 1.0	Q86T90 1xPhospho [S521(98.9)]	1	-0.78	0.0339462	-0.09	0.930465	-0.69	0.145252
SQPDKLQTLSPALKAPEK	Q13415	ORC1	Origin recognition complex subunit 1	Q13415 [278-295]	S(1): 0.0; T(8): 2.0; S(10): 98.0	Q13415 1xPhospho [S287(98)]	1	1.35	0.00151794	0.83	0.0864453	0.53	0.145796
KVPTVSRPYSFIEFDTFIQK	O75396	SEC22B	Vesicle-trafficking protein SEC22b	O75396 [102-121]	T(4): 47.2; S(6): 47.2; Y(9): 0.6; S(10): 5.1; T(16): 0.0		2	1.59	0.00109436	1.06	0.0581634	0.53	0.146068
TPAAAAAMNLASPR	Q9UQ35	SRRM2	Serine/arginine repetitive matrix protein 2	Q9UQ35 [2261-2274]	T(1): 0.0; S(12): 100.0	Q9UQ35 1xPhospho [S2272(100)]	3	0.75	0.00352199	0.38	0.202607	0.37	0.146068
IKDLSTVEALQNLK	Q9BTT0	ANP32E	Acidic leucine-rich nuclear phosphoprotein 32 family member E	Q9BTT0 [100-113]	S(5): 50.0; T(6): 50.0		1	0.58	0.0832777	-0.16	0.802509	0.73	0.146068
SSLGQSASETEEDTVSVSK	Q13435	SF3B2	Splicing factor 3B subunit 2	Q13435 [302-320]	S(1): 0.0; S(2): 0.0; S(6): 0.1; S(8): 7.8; T(10): 92.2; T(14): 0.0; S(16): 0.0; S(18): 0.0		21	-0.27	0.212488	0.19	0.490178	-0.45	0.146089
NLLLSTSEEQIEK	P17181	IFNAR1	Interferon alpha/beta receptor 1	P17181 [489-501]	S(5): 0.1; T(6): 0.6; S(7): 99.4	P17181 1xPhospho [S495(99.4)]	2	-0.42	0.155524	0.2	0.588789	-0.62	0.146179
FLPSPVVIKK	Q13618	CUL3	Cullin-3	Q13618 [734-743]	S(4): 100.0	Q13618 1xPhospho [S737(100)]	2	-0.34	0.107936	-0.99	0.0176892	0.64	0.14677
RIDTLNSDGYTPEPAR	P43403	ZAP70	Tyrosine-protein kinase ZAP-70	P43403 [283-298]	T(4): 0.0; S(7): 0.0; Y(10): 7.3; T(11): 92.7	P43403 1xPhospho [T293(92.7)]	1	0.14	0.541333	-0.43	0.231969	0.57	0.146914
HRPSPPATPPPK	Q8IYB3	SRRM1	Serine/arginine repetitive matrix protein 1	Q8IYB3 [399-410]	S(4): 100.0; T(8): 0.0	Q8IYB3 1xPhospho [S402(100)]	3	-0.79	0.00989881	-0.18	0.491306	-0.6	0.146951
VNFPENGFLSPDK	P31689	DNAJA1	DnaJ homolog subfamily A member 1	P31689 [326-338]	S(10): 100.0	P31689 1xPhospho [S335(100)]	1	1.07	0.00489082	0.56	0.273325	0.51	0.14705
TASESISNLSEAGSIKK	P30622	CLIP1	CAP-Gly domain-containing linker protein 1	P30622 [191-207]	T(1): 0.0; S(3): 0.0; S(5): 0.0; S(7): 0.0; S(10): 100.0; S(14): 100.0	P30622 2xPhospho [S200(100); S204(100)]	1	-0.19	0.429659	0.28	0.288485	-0.48	0.147504
RPLPCTPGDCPSR	P22681	CBL	E3 ubiquitin-protein ligase CBL	P22681 [563-575]	T(6): 50.0; S(12): 50.0		1	2.19	0.00771216	1.13	0.402555	1.06	0.147796
ILESITVSSLMATPQDPK	Q9NQS7	INCENP	Inner centromere protein	Q9NQS7 [227-244]	S(4): 0.0; T(6): 0.0; S(8): 0.0; S(9): 0.0; T(13): 100.0	Q9NQS7 1xPhospho [T239(100)]	1	0.53	0.135108	-0.33	0.6419	0.86	0.147796
AKYPSLGQKPGGSDFLMK	O43768	ENSA	Alpha-endosulfine	O43768 [39-56]	Y(3): 0.0; S(5): 100.0; S(13): 0.0	O43768 1xPhospho [S43(100)]	1	0.16	0.674439	-0.87	0.188455	1.03	0.148108
VSIAAEDDTLDNTFSEELEK	Q5VT06	CEP350	Centrosome-associated protein 350	Q5VT06 [2677-2696]	S(2): 0.0; T(9): 0.0; T(13): 98.2; S(15): 1.8	Q5VT06 1xPhospho [T2689(98.2)]	1	0.68	0.0938909	1.25	0.0162519	-0.57	0.148464
ESSPEKEAEEGCPEK	O43719	HTATSF1	HIV Tat-specific factor 1	O43719 [451-465]	S(2): 8.3; S(3): 91.7	O43719 1xPhospho [S453(91.7)]	2	-0.05	0.84109	0.39	0.147414	-0.44	0.148464
QSTDPFATSSTDPFSAANNSSITSVETLK	P42566	EPS15	Epidermal growth factor receptor substrate 15	P42566 [661-689]	S(2): 0.0; T(3): 0.0; T(8): 0.0; S(9): 0.0; S(10): 0.0; T(11): 0.0; S(15): 0.0; S(20): 2.7; S(21): 10.4; T(23): 43.1; S(24): 43.1; T(27): 0.7		2	-0.88	0.0146349	-0.16	0.625715	-0.71	0.148464
RSSAIGIENIQEVQEK	P47736	RAP1GAP	Rap1 GTPase-activating protein 1	P47736 [497-512]	S(2): 4.3; S(3): 95.7	P47736 1xPhospho [S499(95.7)]	2	0.71	0.0185363	0.19	0.717939	0.52	0.1485
SRSLGPGAGPR	P78549	NTHL1	Endonuclease III-like protein 1	P78549 [20-30]	S(1): 0.4; S(3): 99.6	P78549 1xPhospho [S22(97.4)]	2	1.13	0.0125794	0.38	0.56644	0.75	0.149062
EMFPYEASTPTGISASCR	P42167	TMPO	Lamina-associated polypeptide 2, isoforms beta/gamma	P42167 [347-364]	Y(5): 0.0; S(8): 0.0; T(9): 0.0; T(11): 0.0; S(14): 5.6; S(16): 94.4	P42167 1xPhospho [T357(89.3)]	5	0.4	0.0804904	-0.12	0.822971	0.54	0.149062
NKPGPNIESGNEDDDASFK	O60841	EIF5B	Eukaryotic translation initiation factor 5B	O60841 [206-224]	S(9): 100.0; S(17): 0.0	O60841 1xPhospho [S214(100)]	7	-0.5	0.0274432	-0.04	0.855951	-0.46	0.149062
STTELLPR	Q9BZL6	PRKD2	Serine/threonine-protein kinase D2	Q9BZL6 [225-232]	S(1): 99.7; T(2): 0.3; T(3): 0.0	Q9BZL6 1xPhospho [S225(99.8)]	2	-0.54	0.022359	-0.09	0.779927	-0.46	0.149062
TDSDSDLQLYK	Q01433	AMPD2	AMP deaminase 2	Q01433 [188-198]	T(1): 3.5; S(3): 93.0; S(5): 3.5; Y(10): 0.0		5	-0.63	0.0219616	-0.1	0.773599	-0.54	0.149062
NLNDSSLFVSAEEFGHLLDENMGSK	Q03701	CEBPZ	CCAAT/enhancer-binding protein zeta	Q03701 [969-993]	S(5): 50.0; S(6): 50.0; S(10): 0.0; S(24): 0.0		3	1.2	0.00239959	0.71	0.138259	0.5	0.149323
IDAGTMAEPSASPSKR	Q8IXQ3	C9orf40	Uncharacterized protein C9orf40	Q8IXQ3 [58-73]	T(5): 0.0; S(10): 47.2; S(12): 47.2; S(14): 5.6		1	0.39	0.106852	-0.17	0.729309	0.57	0.149323
HGAGSGCLGTMEVK	Q9BYG5	PARD6B	Partitioning defective 6 homolog beta	Q9BYG5 [7-20]	S(5): 100.0; T(10): 0.0	Q9BYG5 1xPhospho [S11(100)]	1	-1.2	0.00796386	-0.32	0.409652	-0.88	0.149588
IHSPIPDMSK	Q6NZY4	ZCCHC8	Zinc finger CCHC domain-containing protein 8	Q6NZY4 [656-665]	S(3): 100.0; S(9): 0.0	Q6NZY4 1xPhospho [S658(100)]	2	0.13	0.507138	-0.42	0.252068	0.56	0.14964
ASQSRPNSSALETLGGEK	O94804	STK10	Serine/threonine-protein kinase 10	O94804 [447-464]	S(2): 0.8; S(4): 99.3; S(8): 92.2; S(9): 7.8; T(13): 0.0	O94804 2xPhospho [S450(99.2); S454(92.2)]	5	0.43	0.0982618	0.84	0.0170531	-0.41	0.149823
SLTSSLENIFSR	O60343	TBC1D4	TBC1 domain family member 4	O60343 [566-577]	S(1): 0.4; T(3): 99.3; S(4): 0.7; S(5): 99.6; S(11): 0.0	O60343 2xPhospho [T568(99.3); S570(99.6)]	1	0.63	0.080609	-0.14	0.825193	0.77	0.149991
RSSCVSLGETAASYYGSCK	Q13370	PDE3B	cGMP-inhibited 3',5'-cyclic phosphodiesterase B	Q13370 [294-312]	S(2): 8.4; S(3): 90.8; S(6): 0.8; T(10): 0.0; S(13): 0.0; Y(14): 0.0; Y(15): 0.0; S(17): 0.0	Q13370 1xPhospho [S296(90.8)]	1	-0.3	0.206485	0.22	0.511627	-0.53	0.150089
ILGLAIESQDAGIK	O00161	SNAP23	Synaptosomal-associated protein 23	O00161 [27-40]	S(8): 100.0	O00161 1xPhospho [S34(100)]	1	1.95	0.000845044	1.38	0.0413925	0.56	0.150277
HVIADQEVMETNRVESVEPSENEASK	Q9H307	PNN	Pinin	Q9H307 [398-423]	T(11): 0.0; S(16): 100.0; S(20): 0.0; S(25): 0.0	Q9H307 1xPhospho [S413(100)]	1	-0.39	0.0555132	0.01	0.942674	-0.39	0.150422
SGEVDATSDQEESVAWALAPAVPQSPLK	Q8NCD3	HJURP	Holliday junction recognition protein	Q8NCD3 [116-143]	S(1): 0.0; T(7): 0.0; S(8): 0.0; S(13): 0.0; S(25): 100.0	Q8NCD3 1xPhospho [S140(100)]	1	-0.57	0.0465438	0.01	0.992158	-0.58	0.150422
SPGASNFSTLPK	Q9Y4E8	USP15	Ubiquitin carboxyl-terminal hydrolase 15	Q9Y4E8 [229-240]	S(1): 94.6; S(5): 5.4; S(8): 0.0; T(9): 0.0	Q9Y4E8 1xPhospho [S229(94.6)]	4	0.19	0.346336	0.54	0.0377075	-0.35	0.150577
GEGDIHENVDTDLPGSLGQSEEKPVPAAPVPSPVAPAPVPSR	Q9UK76	HN1	Hematological and neurological expressed 1 protein	Q9UK76 [100-141]	T(11): 0.0; S(16): 0.0; S(20): 0.0; S(32): 100.0; S(41): 0.0	Q9UK76 1xPhospho [S131(99.9)]	2	0.98	0.0125167	0.33	0.559687	0.65	0.150822
YSDVEVPASVTGYSFASDGDSGTCSPLR	P35611	ADD1	Alpha-adducin	P35611 [407-434]	Y(1): 0.0; S(2): 0.0; S(9): 0.0; T(11): 0.3; Y(13): 0.3; S(14): 1.2; S(17): 96.8; S(21): 1.2; T(23): 0.1; S(25): 0.0	P35611 1xPhospho [S423(96.8)]	1	-0.85	0.00456625	-0.29	0.249025	-0.57	0.150822
SAQGSSSPVPSMVQKSPR	P35658	NUP214	Nuclear pore complex protein Nup214	P35658 [651-668]	S(1): 0.0; S(5): 0.0; S(6): 0.0; S(7): 0.0; S(11): 0.0; S(16): 100.0	P35658 1xPhospho [S666(100)]	1	0.81	0.0261316	1.29	0.00801574	-0.47	0.150973
ISAPELLLHSPAR	Q5VUA4	ZNF318	Zinc finger protein 318	Q5VUA4 [1887-1899]	S(2): 0.0; S(10): 100.0	Q5VUA4 1xPhospho [S1896(100)]	2	1.16	0.0013873	0.74	0.0738648	0.44	0.151209
RSDSQQAVKSPPLLESPDATR	Q15036	SNX17	Sorting nexin-17	Q15036 [406-426]	S(2): 0.2; S(4): 99.8; S(10): 100.0; S(16): 0.0; T(20): 0.0	Q15036 2xPhospho [S409(99.8); S415(100)]	1	-0.1	0.745504	0.4	0.17381	-0.5	0.151588
LFIIRGSPQQIDHAK	Q92945	KHSRP	Far upstream element-binding protein 2	Q92945 [474-488]	S(7): 100.0	Q92945 1xPhospho [S480(100)]	1	0.15	0.447462	-0.34	0.286906	0.49	0.151648
AMNKSFMESGGTVLSTNWSDVGK	Q9Y2Z0	SUGT1	Suppressor of G2 allele of SKP1 homolog	Q9Y2Z0 [327-349]	S(5): 100.0; S(9): 0.0; T(12): 0.0; S(15): 0.0; T(16): 0.0; S(19): 0.0	Q9Y2Z0 1xPhospho [S331(100)]	4	1.36	0.000390768	1.02	0.0154255	0.34	0.152131
NLSESPVITK	Q12830	BPTF	Nucleosome-remodeling factor subunit BPTF	Q12830 [1227-1236]	S(3): 0.1; S(5): 99.9; T(9): 0.0	Q12830 1xPhospho [S1231(99.9)]	1	0.58	0.0258479	0.11	0.824259	0.46	0.152131
RMSGEPIQTVESIR	Q5VT52	RPRD2	Regulation of nuclear pre-mRNA domain-containing protein 2	Q5VT52 [1097-1110]	S(3): 100.0; T(9): 0.0; S(12): 0.0	Q5VT52 1xPhospho [S1099(100)]	2	0.32	0.113978	-0.15	0.716823	0.48	0.152131
SPGVAAAVAEDGGLK	Q9BTE7	DCUN1D5	DCN1-like protein 5	Q9BTE7 [9-23]	S(1): 100.0	Q9BTE7 1xPhospho [S9(100)]	4	0.34	0.148332	-0.23	0.625768	0.58	0.152419
RESEVLDLK	O95613	PCNT	Pericentrin	O95613 [1651-1659]	S(3): 100.0	O95613 1xPhospho [S1653(100)]	2	0	0.967447	-0.5	0.12428	0.51	0.152419
GVEPSPSPIKPGDIK	Q92890	UFD1L	Ubiquitin fusion degradation protein 1 homolog	Q92890 [241-255]	S(5): 91.8; S(7): 8.2	Q92890 1xPhospho [S245(91.8)]	3	0.35	0.113395	-0.14	0.720087	0.49	0.152464
ECINAAPDSPSK	Q7Z569	BRAP	BRCA1-associated protein	Q7Z569 [109-120]	S(9): 100.0; S(11): 0.0	Q7Z569 1xPhospho [S117(100)]	1	0.1	0.706463	0.51	0.0735757	-0.42	0.152537
SGESVEEVPLYGNLHYLQTGRLSQDPEPDQQDPTLGGPAR	Q9Y3P8	SIT1	Signaling threshold-regulating transmembrane adapter 1	Q9Y3P8 [80-119]	S(1): 0.0; S(4): 0.0; Y(11): 0.0; Y(16): 0.1; T(19): 3.2; S(23): 96.7; T(34): 0.0	Q9Y3P8 1xPhospho [S102(96.7)]	2	0.4	0.230731	0.94	0.0286478	-0.55	0.153145
LDGLVETPTGYIESLPR	P55209	NAP1L1	Nucleosome assembly protein 1-like 1	P55209 [56-72]	T(7): 100.0; T(9): 0.0; Y(11): 0.0; S(14): 0.0	P55209 1xPhospho [S69(100)]	6	0.34	0.121788	-0.17	0.696978	0.5	0.153145
TPSSEELGGDIPGK	Q9NQ66	PLCB1	1-phosphatidylinositol 4,5-bisphosphate phosphodiesterase beta-1	Q9NQ66 [1197-1210]	T(1): 0.3; S(3): 49.8; S(4): 49.8		3	-0.27	0.219472	0.16	0.500439	-0.41	0.153145
RPGGSSPLNAVPCEGPPGSEPPR	P48634	PRRC2A	Protein PRRC2A	P48634 [1686-1708]	S(5): 9.2; S(6): 90.8; S(19): 0.0	P48634 1xPhospho [S1691(90.8)]	2	0.23	0.240331	0.6	0.0294693	-0.37	0.15337
RGSSPGSLEIPK	Q6GYQ0	RALGAPA1	Ral GTPase-activating protein subunit alpha-1	Q6GYQ0 [858-869]	S(3): 99.8; S(4): 0.2; S(7): 0.0	Q6GYQ0 1xPhospho [S860(99.8)]	4	-0.52	0.0163564	-0.08	0.653939	-0.44	0.15337
IEEAMDGSETPQLFTVLPEK	Q13435	SF3B2	Splicing factor 3B subunit 2	Q13435 [771-790]	S(8): 50.0; T(10): 50.0; T(15): 0.0		3	-0.61	0.0162771	-0.11	0.651495	-0.49	0.153519
AMSTTSISSPQPGK	Q9UJU6	DBNL	Drebrin-like protein	Q9UJU6 [267-280]	S(3): 47.9; T(4): 47.9; T(5): 4.2; S(6): 0.0; S(8): 0.0; S(9): 0.0		4	1.36	0.0269355	0.3	0.833831	1.06	0.153721
RWSWGGSAMANSESK	Q8IWC1	MAP7D3	MAP7 domain-containing protein 3	Q8IWC1 [163-177]	S(3): 100.0; S(7): 0.0; S(12): 0.0; S(14): 0.0	Q8IWC1 1xPhospho [S165(100)]	1	1.16	0.00381011	1.52	0.00334076	-0.36	0.154061
SEDDSAKFDSNEEDSASVFSPSFGLK	Q02880	TOP2B	DNA topoisomerase 2-beta	Q02880 [1457-1482]	S(1): 0.0; S(5): 0.0; S(10): 100.0; S(15): 0.0; S(17): 0.0; S(20): 0.0; S(22): 0.0	Q02880 1xPhospho [S1466(99.9)]	3	-0.87	0.00171452	-0.39	0.0939683	-0.48	0.15414
VDAAPGIPPAVESIQDSPLPK	Q15814	TBCC	Tubulin-specific chaperone C	Q15814 [152-172]	S(13): 88.5; S(17): 11.6	Q15814 1xPhospho [S164(88.4)]	2	1.02	0.0458005	0.02	0.994604	1.01	0.154263
SLSPEDAESLSVLSVPSPDTANQEPTPK	P78559	MAP1A	Microtubule-associated protein 1A	P78559 [1144-1171]	S(1): 50.0; S(3): 50.0; S(9): 0.0; S(11): 0.0; S(14): 0.0; S(17): 0.0; T(20): 0.0; T(26): 0.0	P78559 1xPhospho [S1146(80.9)]	6	-0.2	0.347471	0.24	0.360911	-0.45	0.154263
EVTGSSQQTLWRPEGTQSTATLR	Q7Z403	TMC6	Transmembrane channel-like protein 6	Q7Z403 [58-80]	T(3): 1.8; S(5): 32.7; S(6): 32.7; T(9): 32.7; T(16): 0.0; S(18): 0.0; T(19): 0.0; T(21): 0.0		1	-0.35	0.299456	0.3	0.406452	-0.64	0.15453
SKEPHELVGSSPHR	Q3T8J9	GON4L	GON-4-like protein	Q3T8J9 [1886-1899]	S(1): 0.0; S(10): 90.5; S(11): 9.5	Q3T8J9 1xPhospho [S1895(90.5)]	1	2.3	0.015798	0.98	0.633826	1.34	0.154738
QNEQQNQGPPALNSTIQLPFIIINTSRK	Q14188	TFDP2	Transcription factor Dp-2	Q14188 [257-284]	S(14): 100.0; T(15): 100.0; T(25): 0.0; S(26): 0.0	Q14188 2xPhospho [S270(100); T271(100)]	1	0.4	0.294021	0.99	0.0341438	-0.59	0.154738
NSSTDQGSDEEGSLQKEQESAMDK	Q12789	GTF3C1	General transcription factor 3C polypeptide 1	Q12789 [1061-1084]	S(2): 25.0; S(3): 25.0; T(4): 25.0; S(8): 25.0; S(13): 0.0; S(20): 0.0		1	-0.58	0.0144203	-0.14	0.600183	-0.44	0.154881
GLSHSPWAVK	Q96KB5	PBK	Lymphokine-activated killer T-cell-originated protein kinase	Q96KB5 [55-64]	S(3): 50.0; S(5): 50.0		2	1.6	0.0225421	0.46	0.76423	1.14	0.154898
LKLSPNKYQPIQPIQTSK	Q9C0D2	KIAA1731; CEP295	Centrosomal protein KIAA1731	Q9C0D2 [651-668]	S(4): 1.3; Y(8): 98.7; T(16): 0.0; S(17): 0.0	Q9C0D2 1xPhospho [Y658(98.7)]	1	0.5	0.0842249	-0.04	0.827054	0.54	0.154898
AGGAGVPAFYTPTGYGTLVQEGGSPIKYNK	P55809	OXCT1	Succinyl-CoA:3-ketoacid coenzyme A transferase 1, mitochondrial	P55809 [147-176]	Y(10): 0.0; T(11): 0.0; T(13): 0.0; Y(15): 0.0; T(17): 0.0; S(24): 99.8; Y(28): 0.2	P55809 1xPhospho [S170(99.8)]	1	0.11	0.587179	0.5	0.0615759	-0.39	0.154898
SGTLKSPPKGFDTTAINK	Q14155	ARHGEF7	Rho guanine nucleotide exchange factor 7	Q14155 [252-269]	S(1): 2.6; T(3): 2.6; S(6): 94.5; T(13): 0.1; T(14): 0.1	Q14155 1xPhospho [S257(94.5)]	1	0.53	0.0374276	0.89	0.00974825	-0.37	0.155265
SDTDTGVCSGTDEDPDDKNAPFR	Q5JSH3	WDR44	WD repeat-containing protein 44	Q5JSH3 [574-596]	S(1): 0.0; T(3): 0.0; T(5): 0.0; S(9): 99.9; T(11): 0.1	Q5JSH3 1xPhospho [S582(99.6)]	2	0.07	0.724945	0.43	0.0763713	-0.36	0.155265
NQAAIQGRPPYAASAEEVAK	Q9NZB2	FAM120A	Constitutive coactivator of PPAR-gamma-like protein 1	Q9NZB2 [1010-1029]	Y(11): 0.0; S(14): 100.0	Q9NZB2 1xPhospho [S1023(100)]	1	-0.64	0.0227295	-0.09	0.765444	-0.55	0.155265
SLSEINKPNFYNNDFDDDFSHR	Q5QJE6	DNTTIP2	Deoxynucleotidyltransferase terminal-interacting protein 2	Q5QJE6 [251-272]	S(1): 50.0; S(3): 50.0; Y(11): 0.0; S(20): 0.0		2	0.24	0.20049	-0.19	0.535619	0.44	0.155436
TNPPTQKPPSPPMSGR	Q8IZP0	ABI1	Abl interactor 1	Q8IZP0 [174-189]	T(1): 0.0; T(5): 0.0; S(10): 99.9; S(14): 0.1	Q8IZP0 1xPhospho [S183(99.9)]	1	-0.51	0.0827434	0.11	0.836567	-0.63	0.155756
VPSPLEGSEGDGDTD	Q9Y606	PUS1	tRNA pseudouridine synthase A, mitochondrial	Q9Y606 [413-427]	S(3): 0.0; S(8): 0.0; T(14): 100.0	Q9Y606 1xPhospho [T426(100)]	1	-0.44	0.0406487	0	0.956372	-0.44	0.155947
QINIHNLSAFYDSELFR	P49736	MCM2	DNA replication licensing factor MCM2	P49736 [871-887]	S(8): 100.0; Y(11): 0.0; S(13): 0.0	P49736 1xPhospho [S878(100)]	1	0.35	0.0927138	-0.1	0.797254	0.45	0.156055
AMPVPTTPEFQSPVTTDQPISPEPITQPSCIK	Q14676	MDC1	Mediator of DNA damage checkpoint protein 1	Q14676 [1691-1722]	T(6): 49.9; T(7): 49.9; S(12): 0.1; T(15): 0.0; T(16): 0.0; S(21): 0.0; T(26): 0.0; S(29): 0.0	Q14676 1xPhospho [T1697(75.5)]	3	-0.37	0.103866	0.07	0.759502	-0.44	0.156055
TTNPFYNTM	Q76I76	SSH2	Protein phosphatase Slingshot homolog 2	Q76I76 [1415-1423]	T(1): 0.0; T(2): 0.0; Y(6): 0.0; T(8): 100.0	Q76I76 1xPhospho [T1422(100)]	1	-0.44	0.18131	0.18	0.570269	-0.62	0.156067
NMTVEQLLTGSPTSPTVEPEKPTR	Q9C0C9	UBE2O	E2/E3 hybrid ubiquitin-protein ligase UBE2O	Q9C0C9 [826-849]	T(3): 0.0; T(9): 0.3; S(11): 75.9; T(13): 11.1; S(14): 11.1; T(16): 1.7; T(23): 0.1		7	-0.36	0.0998817	0.09	0.770994	-0.46	0.156257
SPGHMVILDQTK	Q9NWH9	SLTM	SAFB-like transcription modulator	Q9NWH9 [553-564]	S(1): 100.0; T(11): 0.0	Q9NWH9 1xPhospho [S553(100)]	7	-0.29	0.135646	0.12	0.670616	-0.4	0.156329
FLESYATDNEK	Q9BZI7	UPF3B	Regulator of nonsense transcripts 3B	Q9BZI7 [163-173]	S(4): 0.0; Y(5): 0.0; T(7): 100.0	Q9BZI7 1xPhospho [T169(100)]	1	-0.44	0.0367528	-0.04	0.923989	-0.4	0.156329
SILKPSTPIPPQEGEEVGESSEEQDNAPK	Q9UDY2	TJP2	Tight junction protein ZO-2	Q9UDY2 [1048-1076]	S(1): 0.0; S(6): 0.0; T(7): 0.0; S(20): 50.0; S(21): 50.0		6	-0.26	0.167117	0.12	0.59954	-0.38	0.156591
ITSLCLLK	Q8TEP8	CEP192	Centrosomal protein of 192 kDa	Q8TEP8 [319-326]	T(2): 5.5; S(3): 94.5	Q8TEP8 1xPhospho [S321(94.5)]	1	1.46	0.00700037	0.73	0.346562	0.72	0.156602
SLVGSWLK	Q6ICG6	KIAA0930	Uncharacterized protein KIAA0930	Q6ICG6 [358-365]	S(1): 0.0; S(5): 100.0	Q6ICG6 1xPhospho [S362(100)]	2	-0.34	0.152393	0.1	0.630642	-0.44	0.156984
SGSIGAADSPENWEK	Q96FZ2	C3orf37; HMCES	Embryonic stem cell-specific 5-hydroxymethylcytosine-binding protein	Q96FZ2 [152-166]	S(1): 0.0; S(3): 0.0; S(9): 100.0	Q96FZ2 1xPhospho [S160(100)]	1	-0.23	0.221527	0.16	0.51088	-0.41	0.15712
TSIDPSPESHEVMER	Q562F6	SGOL2	Shugoshin-like 2	Q562F6 [1084-1098]	T(1): 0.0; S(2): 0.2; S(6): 98.5; S(9): 1.3	Q562F6 1xPhospho [S1089(98.5)]	1	-0.75	0.00636135	-0.26	0.318336	-0.49	0.15712
VTYLSPDAIEDTESQK	Q9UGK8	SERGEF	Secretion-regulating guanine nucleotide exchange factor	Q9UGK8 [414-429]	T(2): 0.7; Y(3): 7.5; S(5): 91.9; T(12): 0.0; S(14): 0.0	Q9UGK8 1xPhospho [S418(91.9)]	1	0.62	0.0373362	0.1	0.926499	0.52	0.157434
MLENQNSLLSSSSGMFK	Q8TF71	SLC16A10	Monocarboxylate transporter 10	Q8TF71 [492-508]	S(7): 0.0; S(10): 0.0; S(11): 0.1; S(12): 0.7; S(13): 99.2	Q8TF71 1xPhospho [S504(99.2)]	1	-0.69	0.076001	0.06	0.868715	-0.75	0.157548
DVATSPISPTENNTTPPDALTR	Q13153	PAK1	Serine/threonine-protein kinase PAK 1	Q13153 [216-237]	T(4): 0.0; S(5): 0.0; S(8): 0.0; T(10): 0.0; T(14): 6.0; T(15): 94.0; T(21): 0.0	Q13153 1xPhospho [T230(85.8)]	3	-1.26	0.000537992	-0.66	0.0232779	-0.59	0.157732
YSDFEWLK	Q9UMY4	SNX12	Sorting nexin-12	Q9UMY4 [72-79]	Y(1): 96.1; S(2): 3.9	Q9UMY4 1xPhospho [Y72(96.1)]	1	1.09	0.177104	1.95	0.0252599	-0.86	0.158154
FTVQMPTSQSPAVK	Q16594	TAF9	Transcription initiation factor TFIID subunit 9	Q16594 [187-200]	T(2): 0.0; T(7): 0.0; S(8): 0.0; S(10): 100.0	Q16594 1xPhospho [S196(100)]	2	1.19	0.0248319	0.27	0.789099	0.92	0.158194
LQDSFASETNLDFR	Q92621	NUP205	Nuclear pore complex protein Nup205	Q92621 [1936-1949]	S(4): 0.1; S(7): 99.4; T(9): 0.6	Q92621 1xPhospho [S1939(100)]	3	0.72	0.0166482	1.11	0.00656717	-0.38	0.158194
VSVDSNLFVYSKSDALLSK	Q8TDJ6	DMXL2	DmX-like protein 2	Q8TDJ6 [1139-1157]	S(2): 0.0; S(5): 0.0; Y(10): 46.7; S(11): 46.7; S(13): 6.5; S(18): 0.0		3	0.33	0.206343	0.77	0.0274253	-0.43	0.158194
GGNLPPVSPNDSGAK	Q9UK61	FAM208A	Protein FAM208A	Q9UK61 [1096-1110]	S(8): 100.0; S(12): 0.0	Q9UK61 1xPhospho [S1103(100)]	2	-0.18	0.331012	0.21	0.383421	-0.38	0.158194
LTALNDSSLDLSMDSDNSMSVPSPTSATK	P51003	PAPOLA	Poly(A) polymerase alpha	P51003 [515-543]	T(2): 0.0; S(7): 0.0; S(8): 0.0; S(12): 0.0; S(15): 0.0; S(18): 0.0; S(20): 0.0; S(23): 13.0; T(25): 71.6; S(26): 13.0; T(28): 2.5	P51003 1xPhospho [S532(75.9)]	4	-0.65	0.0107206	-0.18	0.484648	-0.48	0.158194
RHCAPSPDRSPELSSSR	Q96T37	RBM15	Putative RNA-binding protein 15	Q96T37 [665-681]	S(6): 100.0; S(10): 77.9; S(14): 7.4; S(15): 7.4; S(16): 7.4	Q96T37 2xPhospho [S670(100); S674(77.9)]	1	0.74	0.0629545	1.22	0.0134862	-0.49	0.158442
VENMDISDEEEGGAPPPGSPQVLEEDEAELELQK	O43290	SART1	U4/U6.U5 tri-snRNP-associated protein 1	O43290 [468-501]	S(7): 100.0; S(19): 100.0	O43290 2xPhospho [S474(100); S486(100)]	4	-0.39	0.113026	0.07	0.740991	-0.47	0.158442
AVSFHLVHR	Q96GA3	LTV1	Protein LTV1 homolog	Q96GA3 [15-23]	S(3): 100.0	Q96GA3 1xPhospho [S17(100)]	1	1.46	0.0395944	0.16	0.941744	1.31	0.158445
TSESITSNEDVSPDVCDEFTGIEPLSEDAIITGFR	O60566	BUB1B	Mitotic checkpoint serine/threonine-protein kinase BUB1 beta	O60566 [563-597]	T(1): 0.0; S(2): 0.0; S(4): 0.0; T(6): 0.0; S(7): 0.0; S(12): 100.0; T(20): 0.0; S(26): 0.0; T(32): 0.0	O60566 1xPhospho [S574(100)]	3	0.15	0.694487	0.75	0.0747055	-0.6	0.158445
QTHLRATPTKAPAPVVLGSPVVLGPPVGQAR	Q6ZN55	ZNF574	Zinc finger protein 574	Q6ZN55 [146-176]	T(2): 83.4; T(7): 15.9; T(9): 0.7; S(19): 0.0	Q6ZN55 1xPhospho [T147(83.4)]	1	0.3	0.128096	-0.11	0.697853	0.41	0.15851
SQSFAGVLGSHER	Q6ZS17	FAM65A	Protein FAM65A	Q6ZS17 [20-32]	S(1): 0.2; S(3): 99.8; S(10): 0.0	Q6ZS17 1xPhospho [S22(99.8)]	2	0.58	0.0343181	0.81	0.00956544	-0.23	0.158685
SAASNTGTPDGPEAPPGPDASPDASFGK	O00562	PITPNM1	Membrane-associated phosphatidylinositol transfer protein 1	O00562 [280-307]	S(1): 0.0; S(4): 0.0; T(6): 0.0; T(8): 0.0; S(21): 50.0; S(25): 50.0		2	-0.58	0.0118652	-0.19	0.516981	-0.4	0.158685
DAVFDGSSCISPTIVQQFGYQR	P04049	RAF1	RAF proto-oncogene serine/threonine-protein kinase	P04049 [19-40]	S(7): 0.0; S(8): 0.0; S(11): 98.6; T(13): 1.4; Y(20): 0.0	P04049 1xPhospho [S29(98.6)]	1	0.17	0.461749	-0.4	0.29384	0.57	0.159031
SLESLDTSLFAK	Q12874	SF3A3	Splicing factor 3A subunit 3	Q12874 [292-303]	S(1): 5.2; S(4): 94.8; T(7): 0.0; S(8): 0.0	Q12874 1xPhospho [S295(94.8)]	2	1.73	0.00716652	0.9	0.348441	0.81	0.159065
QQSHFAMMHGGTGFAGIDSSSPEVK	Q15365	PCBP1	Poly(rC)-binding protein 1	Q15365 [244-268]	S(3): 0.0; T(12): 0.0; S(19): 0.0; S(20): 10.5; S(21): 89.5	Q15365 1xPhospho [S264(94.2)]	2	0.68	0.0286443	0.11	0.838678	0.58	0.159178
ILRLSTFEK	O94804	STK10	Serine/threonine-protein kinase 10	O94804 [9-17]	S(5): 100.0; T(6): 100.0	O94804 2xPhospho [S13(100); T14(100)]	1	0.13	0.746128	-0.98	0.18304	1.11	0.159178
VIGQDHDFSESSEEEAPAEASSGALR	P23497	SP100	Nuclear autoantigen Sp-100	P23497 [399-424]	S(9): 0.0; S(11): 50.0; S(12): 50.0; S(21): 0.0; S(22): 0.0		1	0.34	0.308401	0.87	0.0362546	-0.53	0.159283
LSAFPEPPEDGTLLSEAK	Q9UPN4	AZI1; CEP131	Centrosomal protein of 131 kDa	Q9UPN4 [511-528]	S(2): 0.0; T(12): 0.0; S(15): 100.0	Q9UPN4 1xPhospho [S525(100)]	2	0.31	0.214595	0.72	0.0284121	-0.41	0.159283
RLSQSSLESATSPSCS	Q9UJD0	RIMS3	Regulating synaptic membrane exocytosis protein 3	Q9UJD0 [293-308]	S(3): 99.9; S(5): 49.6; S(6): 49.7; S(9): 0.8; T(11): 0.0; S(12): 0.0; S(14): 0.0; S(16): 0.0	Q9UJD0 2xPhospho [S295(99.9); S/T]	1	-0.66	0.00965981	-0.24	0.444716	-0.42	0.159283
KLPFTAGANGEQKDSDTEK	Q6UB99	ANKRD11	Ankyrin repeat domain-containing protein 11	Q6UB99 [59-77]	T(5): 0.0; S(15): 1.8; T(17): 98.3	Q6UB99 1xPhospho [S73(86.6)]	2	-0.75	0.0152185	-0.16	0.603152	-0.6	0.159283
NLSDIGWPVFEIPSPR	Q9Y6R4	MAP3K4	Mitogen-activated protein kinase kinase kinase 4	Q9Y6R4 [418-433]	S(3): 0.0; S(14): 100.0	Q9Y6R4 1xPhospho [S431(100)]	1	-0.79	0.0178855	-0.16	0.666451	-0.64	0.159656
HSEIQQLER	Q12846	STX4	Syntaxin-4	Q12846 [207-215]	S(2): 100.0	Q12846 1xPhospho [S208(100)]	1	1.07	0.0254166	1.57	0.00818774	-0.5	0.159815
SPSSSVGSPPVLYMQPSPL	Q9NYV6	RRN3	RNA polymerase I-specific transcription initiation factor RRN3	Q9NYV6 [633-651]	S(1): 0.0; S(3): 8.0; S(4): 0.8; S(5): 8.0; S(8): 83.2; Y(13): 0.0; S(17): 0.0	Q9NYV6 1xPhospho [S640(83.2)]	1	-0.53	0.0280063	-0.13	0.828575	-0.4	0.159815
VSGEEELHTGPPAPQGPLSVPQGLPTQSLASPPAR	Q9UPN7	PPP6R1	Serine/threonine-protein phosphatase 6 regulatory subunit 1	Q9UPN7 [729-763]	S(2): 0.0; T(9): 0.0; S(19): 0.0; T(26): 0.0; S(28): 0.0; S(31): 99.9	Q9UPN7 1xPhospho [S759(99.9)]	1	1.3	0.0179326	0.39	0.666794	0.91	0.159823
WNSVSPASAGK	Q86UE4	MTDH	Protein LYRIC	Q86UE4 [304-314]	S(3): 0.3; S(5): 99.7; S(8): 0.0	Q86UE4 1xPhospho [S308(99.7)]	1	1.39	0.00189578	0.87	0.10061	0.51	0.160589
NVFSSSGTSFSGRK	P49790	NUP153	Nuclear pore complex protein Nup153	P49790 [1453-1466]	S(4): 0.0; S(5): 0.0; S(6): 0.0; T(8): 0.0; S(9): 1.1; S(11): 98.9	P49790 1xPhospho [S1463(98.9)]	1	2.35	0.00679166	1.36	0.327979	0.98	0.1612
LQLQGLDLSSR	P49454	CENPF	Centromere protein F	P49454 [1739-1749]	S(9): 91.1; S(10): 8.9	P49454 1xPhospho [S1747(91.1)]	1	0.3	0.24724	-0.29	0.485834	0.6	0.161379
TTTPNMNPAINYQPQSSSSVPCQR	Q8WXI9	GATAD2B	Transcriptional repressor p66-beta	Q8WXI9 [287-310]	T(1): 7.8; T(2): 46.0; T(3): 46.0; Y(12): 0.3; S(16): 0.0; S(17): 0.0; S(18): 0.0; S(19): 0.0		2	0.79	0.00639919	0.38	0.311317	0.41	0.161772
QIFEDHVFCHSL	Q13137	CALCOCO2	Calcium-binding and coiled-coil domain-containing protein 2	Q13137 [435-446]	S(11): 100.0	Q13137 1xPhospho [S445(100)]	1	0.2	0.280635	-0.19	0.445003	0.39	0.161772
GILFVGSGVSGGEEGAR	P52209	PGD	6-phosphogluconate dehydrogenase, decarboxylating	P52209 [120-136]	S(7): 0.0; S(10): 100.0	P52209 1xPhospho [S129(100)]	1	-0.64	0.00816075	-0.2	0.387199	-0.44	0.161772
KEGISDVVEGMELNSSITSQDVLMSSPEK	Q15398	DLGAP5	Disks large-associated protein 5	Q15398 [742-770]	S(5): 0.0; S(15): 0.0; S(16): 0.0; T(18): 0.0; S(19): 0.0; S(25): 50.0; S(26): 50.0		3	-0.84	0.00467148	-0.29	0.234631	-0.54	0.161786
RDGPGLERSPGEPGGAAPER	Q96EB6	SIRT1	NAD-dependent protein deacetylase sirtuin-1	Q96EB6 [39-58]	S(9): 100.0	Q96EB6 1xPhospho [S47(100)]	1	-0.14	0.589905	0.36	0.236653	-0.5	0.16182
FITSSASDFSDPVYK	Q8IV48	ERI1	3'-5' exoribonuclease 1	Q8IV48 [53-67]	T(3): 0.0; S(4): 0.0; S(5): 0.0; S(7): 0.0; S(10): 100.0; Y(14): 0.0	Q8IV48 1xPhospho [S62(100)]	1	-0.09	0.665928	0.31	0.21049	-0.4	0.162024
NYQQNYQNSESGEKNEGSESAPEGQAQQR	P67809	YBX1	Nuclease-sensitive element-binding protein 1	P67809 [157-185]	Y(2): 0.0; Y(6): 0.0; S(9): 99.2; S(11): 0.8; S(18): 0.0; S(20): 0.0		5	-0.29	0.357002	0.32	0.370504	-0.62	0.162024
SPGQMTVPLCIGVSTDK	Q8NCD3	HJURP	Holliday junction recognition protein	Q8NCD3 [595-611]	S(1): 100.0; T(6): 0.0; S(14): 0.0; T(15): 0.0	Q8NCD3 1xPhospho [S595(100)]	1	0.78	0.00743014	0.36	0.352584	0.42	0.162185
SFLVASVLPGPDGNINSPTR	Q7Z3K3	POGZ	Pogo transposable element with ZNF domain	Q7Z3K3 [1322-1341]	S(1): 0.0; S(6): 0.0; S(17): 50.0; T(19): 50.0	Q7Z3K3 1xPhospho [S1338(89.5)]	6	-0.82	0.00413477	-0.31	0.21031	-0.49	0.162185
SPVTTLLECMHK	P55265	ADAR	Double-stranded RNA-specific adenosine deaminase	P55265 [614-625]	S(1): 95.7; T(4): 4.1; T(5): 0.2	P55265 1xPhospho [S614(94.7)]	4	1.23	0.00082244	0.85	0.0363278	0.37	0.162427
VLGSEGEEEDEALSPAK	P18858	LIG1	DNA ligase 1	P18858 [63-79]	S(4): 0.0; S(14): 100.0	P18858 1xPhospho [S76(100)]	10	-0.46	0.0476115	-0.01	0.984511	-0.45	0.162427
LSQSSQDSSPVR	O95251	KAT7	Histone acetyltransferase KAT7	O95251 [49-60]	S(2): 0.0; S(4): 0.0; S(5): 0.0; S(8): 7.6; S(9): 92.4	O95251 1xPhospho [S57(92.4)]	1	-0.27	0.167448	0.13	0.617207	-0.41	0.162526
RAVSVHEDQLQAPAERPLR	Q6F5E8	RLTPR	Leucine-rich repeat-containing protein 16C	Q6F5E8 [1359-1377]	S(4): 100.0	Q6F5E8 1xPhospho [S1362(100)]	1	0.54	0.0220375	0.14	0.734493	0.39	0.162546
PSPAPPAVPPAASPVMPPQTQSPGQPAQPAPMVPLHQK	P51532	SMARCA4	Transcription activator BRG1	P51532 [311-348]	S(2): 0.0; S(13): 0.1; T(20): 81.6; S(22): 18.4	P51532 1xPhospho [T330(81.6)]	2	-0.82	0.0691512	0.05	0.913207	-0.86	0.162546
DMSPLSETEMALGKDVTPPPETEVVLIK	P27816	MAP4	Microtubule-associated protein 4	P27816 [505-532]	S(3): 3.4; S(6): 79.3; T(8): 17.3; T(17): 84.4; T(22): 15.6	P27816 2xPhospho [T512(82.7); T521(100)]	2	0.54	0.0837151	-0.1	0.854957	0.65	0.16259
SLKESEQESEEEILAQK	Q9BW71	HIRIP3	HIRA-interacting protein 3	Q9BW71 [219-235]	S(1): 0.0; S(5): 100.0; S(9): 100.0	Q9BW71 2xPhospho [S223(100); S227(100)]	3	-0.1	0.612826	0.28	0.228839	-0.39	0.16259
YPLCSADAAVSTTPPGSPPPPPPLPEPPVLK	Q9BTC0	DIDO1	Death-inducer obliterator 1	Q9BTC0 [1244-1274]	Y(1): 0.0; S(5): 0.0; S(11): 0.4; T(12): 13.2; T(13): 86.5; S(17): 100.0	Q9BTC0 2xPhospho [T1256(97.3); S1260(99.9)]	5	-0.15	0.46365	0.26	0.299849	-0.41	0.16259
NASASFQELEDK	Q99543	DNAJC2	DnaJ homolog subfamily C member 2	Q99543 [45-56]	S(3): 4.4; S(5): 95.6	Q99543 1xPhospho [S49(95.6)]	1	-0.59	0.0763186	0.03	0.8835	-0.62	0.162675
TPPCCLPQIPGVTTPPTAPLSK	O60516	EIF4EBP3	Eukaryotic translation initiation factor 4E-binding protein 3	O60516 [56-77]	T(1): 0.0; T(13): 10.9; T(14): 87.6; T(17): 1.4; S(21): 0.0	O60516 1xPhospho [T56(100)]	4	1.17	0.00369084	0.59	0.188634	0.58	0.162976
ELSSEPQTPPAQK	P78559	MAP1A	Microtubule-associated protein 1A	P78559 [497-509]	S(3): 0.0; S(4): 0.0; T(8): 100.0	P78559 1xPhospho [T504(100)]	1	1.37	0.00129219	0.92	0.0624111	0.44	0.163146
KLLSPSNEK	Q14694	USP10	Ubiquitin carboxyl-terminal hydrolase 10	Q14694 [544-552]	S(4): 90.2; S(6): 9.8	Q14694 1xPhospho [S547(90.2)]	1	0.5	0.0458106	0.02	0.970116	0.49	0.16336
HELSPPQK	Q9BXP5	SRRT	Serrate RNA effector molecule homolog	Q9BXP5 [71-78]	S(4): 100.0	Q9BXP5 1xPhospho [S74(100)]	1	0.02	0.949169	0.53	0.117226	-0.51	0.16336
YVLGQLVGLNSPNSILK	P33981	TTK	Dual specificity protein kinase TTK	P33981 [811-827]	Y(1): 0.0; S(11): 8.9; S(14): 91.1	P33981 1xPhospho [S824(99.9)]	3	1.27	0.0045281	0.69	0.224632	0.57	0.163467
AASAPAKGTPGKGATPAPPGK	Q13428	TCOF1	Treacle protein	Q13428 [302-322]	S(3): 0.0; T(9): 100.0; T(15): 0.0	Q13428 1xPhospho [T310(100)]	1	2.07	0.0167599	0.85	0.626487	1.22	0.163821
SNELGDVGVHCVLQGLQTPSCK	P13489	RNH1	Ribonuclease inhibitor	P13489 [65-86]	S(1): 0.0; T(18): 85.6; S(20): 14.4	P13489 1xPhospho [T82(85.6)]	1	0.43	0.061399	-0.02	0.949619	0.46	0.163821
DDKHGSYEDAVHSGALND	P17987	TCP1	T-complex protein 1 subunit alpha	P17987 [539-556]	S(6): 49.9; Y(7): 49.9; S(13): 0.2		2	0.27	0.281237	0.69	0.0351115	-0.42	0.163821
NFSSATEDEIDQCVK	P29374	ARID4A	AT-rich interactive domain-containing protein 4A	P29374 [837-851]	S(3): 94.2; S(4): 5.5; T(6): 0.3	P29374 1xPhospho [S839(94.2)]	2	-0.17	0.503731	0.28	0.281744	-0.45	0.163821
TLTDEVNSPDSDRR	Q8TAQ2	SMARCC2	SWI/SNF complex subunit SMARCC2	Q8TAQ2 [276-289]	T(1): 0.0; T(3): 0.0; S(8): 0.0; S(11): 100.0	Q8TAQ2 1xPhospho [S283(100)]	8	-0.18	0.44884	0.27	0.311838	-0.44	0.163821
ISREPEPAAGPQAEESATVSAPAPMSPTR	Q9BWG6	SCNM1	Sodium channel modifier 1	Q9BWG6 [158-186]	S(2): 0.0; S(16): 0.0; T(18): 0.0; S(20): 0.0; S(26): 86.8; T(28): 13.3		3	-0.38	0.0875118	0.03	0.844237	-0.41	0.163821
PSLDFPASAFGFSSLQPAPPQLPSPAEPR	P78559	MAP1A	Microtubule-associated protein 1A	P78559 [2159-2187]	S(2): 0.0; S(8): 0.0; S(13): 0.0; S(14): 0.0; S(24): 100.0	P78559 1xPhospho [S2182(100)]	1	1.05	0.0112977	1.48	0.00595341	-0.45	0.163932
TSDFNTFLAQEGCTK	Q9UHD1	CHORDC1	Cysteine and histidine-rich domain-containing protein 1	Q9UHD1 [199-213]	T(1): 50.0; S(2): 50.0; T(6): 0.0; T(14): 0.0		1	0.62	0.0997552	1.14	0.0187476	-0.5	0.163932
ESDQTLAALLSPKESSGGEK	P18583	SON	Protein SON	P18583 [1687-1706]	S(2): 0.0; T(5): 0.0; S(11): 47.8; S(15): 47.8; S(16): 4.5		2	0.37	0.115394	-0.14	0.752616	0.5	0.163932
KLSNSSSSVSPLILSSNLPVNNK	Q9BVC5	C2orf49	Ashwin	Q9BVC5 [141-163]	S(3): 0.4; S(5): 0.1; S(6): 0.1; S(7): 0.4; S(8): 2.4; S(10): 91.9; S(15): 2.4; S(16): 2.4	Q9BVC5 1xPhospho [S150(91.9)]	2	-0.01	0.948558	-0.53	0.117604	0.53	0.163932
LMHNASDSEVDQDDVVEWK	Q9H2P0	ADNP	Activity-dependent neuroprotector homeobox protein	Q9H2P0 [948-966]	S(6): 100.0; S(8): 100.0	Q9H2P0 2xPhospho [S953(100); S955(100)]	6	-0.24	0.251524	0.18	0.48974	-0.42	0.163936
KPRPSEGDEDCLPASK	P78346	RPP30	Ribonuclease P protein subunit p30	P78346 [247-262]	S(5): 100.0; S(15): 0.0	P78346 1xPhospho [S251(100)]	1	1.67	0.00494597	0.94	0.24331	0.72	0.163951
KLSPIIEDSR	O60566	BUB1B	Mitotic checkpoint serine/threonine-protein kinase BUB1 beta	O60566 [668-677]	S(3): 100.0; S(9): 0.0	O60566 1xPhospho [S670(100)]	2	-0.34	0.117574	0.09	0.746552	-0.43	0.163951
RCSDNTEVEVSNLENKQPVESTSAK	Q9NQW6	ANLN	Actin-binding protein anillin	Q9NQW6 [70-94]	S(3): 98.9; T(6): 1.1; S(11): 0.0; S(21): 0.0; T(22): 0.0; S(23): 0.0	Q9NQW6 1xPhospho [S72(98.9)]	2	0.01	0.946675	-0.55	0.139311	0.57	0.164056
TASESISNLSEAGSIK	P30622	CLIP1	CAP-Gly domain-containing linker protein 1	P30622 [191-206]	T(1): 0.0; S(3): 0.0; S(5): 0.0; S(7): 0.0; S(10): 0.0; S(14): 100.0	P30622 1xPhospho [S204(100)]	4	-0.21	0.474898	0.3	0.297892	-0.5	0.164056
QNSPVTSPGSSPLAQR	Q13191	CBLB	E3 ubiquitin-protein ligase CBL-B	Q13191 [474-489]	S(3): 0.0; T(6): 0.0; S(7): 100.0; S(10): 0.0; S(11): 0.0	Q13191 1xPhospho [S480(100)]	1	-0.01	0.95693	0.47	0.137353	-0.48	0.164328
TRTPASINATPANINLADLTR	Q7KZ85	SUPT6H	Transcription elongation factor SPT6	Q7KZ85 [1530-1550]	T(1): 50.1; T(3): 50.1; S(6): 49.9; T(10): 49.9; T(20): 0.0		2	-1.29	0.000831795	-0.62	0.0363278	-0.66	0.164328
QPPVSPGTALVGSQK	P17096	HMGA1	High mobility group protein HMG-I/HMG-Y	P17096 [32-46]	S(5): 50.0; T(8): 50.0; S(13): 0.0		2	0.87	0.00228146	0.48	0.117369	0.39	0.164759
KSFDHLISDTK	P21359	NF1	Neurofibromin	P21359 [2542-2552]	S(2): 100.0; S(8): 0.0; T(10): 0.0	P21359 1xPhospho [S2543(100)]	2	0.56	0.0887345	-0.13	0.843779	0.69	0.164759
LHCPPSPHLENPPK	Q8IZD2	KMT2E; MLL5	Histone-lysine N-methyltransferase 2E	Q8IZD2 [1439-1452]	S(6): 100.0	Q8IZD2 1xPhospho [S1444(100)]	2	0.3	0.174375	-0.36	0.61324	0.66	0.164759
SKGPSAAGEQEPDKESGASVDEVAR	P50579	METAP2	Methionine aminopeptidase 2	P50579 [45-69]	S(1): 0.0; S(5): 0.0; S(16): 50.0; S(19): 50.0	P50579 1xPhospho [S63(86.2)]	3	-0.34	0.133204	0.09	0.707563	-0.43	0.164759
TPQMPPTTPSSSFFTK	Q16666	IFI16	Gamma-interferon-inducible protein 16	Q16666 [428-443]	T(1): 0.0; T(7): 84.4; T(8): 12.7; S(10): 2.1; S(11): 0.4; S(12): 0.4; T(15): 0.1	Q16666 1xPhospho [T434(84.4)]	1	1.2	0.0123358	0.49	0.511077	0.7	0.16516
MDKSAVGHEYVAEVEK	P14317	HCLS1	Hematopoietic lineage cell-specific protein	P14317 [94-109]	S(4): 98.2; Y(10): 1.8	P14317 1xPhospho [S97(98.2)]	1	1.04	0.0031376	0.58	0.160366	0.45	0.16516
KLEKEEEEGISQESSEEEQ	P17096	HMGA1	High mobility group protein HMG-I/HMG-Y	P17096 [89-107]	S(11): 1.4; S(14): 99.3; S(15): 99.3	P17096 2xPhospho [S102(99.8); S103(99.8)]	9	-0.02	0.930932	0.4	0.144083	-0.42	0.16516
EVLRLSLSSESELPSLPLFSEK	Q7Z591	AKNA	AT-hook-containing transcription factor	Q7Z591 [1165-1186]	S(6): 0.3; S(8): 1.8; S(9): 11.2; S(11): 75.6; S(15): 11.2; S(20): 0.0	Q7Z591 1xPhospho [S1175(75.6)]	2	1.05	0.00586615	0.53	0.280496	0.52	0.165228
ASPSVSTAGQPNWNLDEQLK	Q8IVW6	ARID3B	AT-rich interactive domain-containing protein 3B	Q8IVW6 [164-183]	S(2): 50.0; S(4): 50.0; S(6): 0.0; T(7): 0.0		4	-0.37	0.0882303	0.06	0.849312	-0.41	0.165763
TDPASLETGQDSEDDSGEPEDWVPDPVDADPGK	Q9UJX6	ANAPC2	Anaphase-promoting complex subunit 2	Q9UJX6 [459-491]	T(1): 0.0; S(5): 0.0; T(8): 0.0; S(12): 99.9; S(16): 0.0		7	0.04	0.893791	0.56	0.10865	-0.51	0.165778
QERLSPEVAPPAHR	Q8TAD8	SNIP1	Smad nuclear-interacting protein 1	Q8TAD8 [31-44]	S(5): 100.0	Q8TAD8 1xPhospho [S35(100)]	1	-0.38	0.122075	0.09	0.740163	-0.49	0.165869
SKAPGSPLSSEGAAGEGVR	Q6JBY9	RCSD1	CapZ-interacting protein	Q6JBY9 [211-229]	S(1): 0.0; S(6): 100.0; S(9): 90.5; S(10): 9.5	Q6JBY9 2xPhospho [S216(100); S219(90.5)]	1	-0.02	0.90617	0.35	0.150522	-0.38	0.165879
LTRYSQGDDDGSSSSGGSSVAGSQSTLFK	Q9UH99	SUN2	SUN domain-containing protein 2	Q9UH99 [8-36]	T(2): 80.8; Y(4): 15.9; S(5): 3.3; S(12): 0.0; S(13): 0.0; S(14): 0.0; S(15): 0.0; S(18): 0.0; S(19): 0.0; S(23): 0.0; S(25): 0.0; T(26): 0.0	Q9UH99 1xPhospho [T9(80.8)]	3	0.5	0.0435295	0.02	0.946316	0.47	0.166189
RGSLLGSMK	Q9HDC5	JPH1	Junctophilin-1	Q9HDC5 [214-222]	S(3): 100.0; S(7): 0.0	Q9HDC5 1xPhospho [S216(100)]	1	-0.14	0.509341	-0.69	0.0581082	0.55	0.166189
QNPQSPPQDSSVTSK	Q9UBN7	HDAC6	Histone deacetylase 6	Q9UBN7 [18-32]	S(5): 100.0; S(10): 0.0; S(11): 0.0; T(13): 0.0; S(14): 0.0	Q9UBN7 1xPhospho [S22(100)]	1	0.86	0.00788559	1.18	0.00500778	-0.32	0.166458
TQVSVTAAIPHLK	Q9NYV4	CDK12	Cyclin-dependent kinase 12	Q9NYV4 [611-623]	T(1): 50.0; S(4): 50.0; T(6): 0.0		1	0.39	0.105605	-0.12	0.790031	0.5	0.166458
SDSIRPALNSPVERPSSDQEEGETSAQTER	Q9UKV5	AMFR	E3 ubiquitin-protein ligase AMFR	Q9UKV5 [507-536]	S(1): 0.0; S(3): 0.0; S(10): 0.0; S(16): 87.7; S(17): 12.3; T(24): 0.0; S(25): 0.0; T(28): 0.0	Q9UKV5 1xPhospho [S523(84.7)]	3	-0.58	0.0392668	-0.03	0.916302	-0.55	0.166458
NQSPTEAEKPASSSLPSSPPPQLLTR	Q99567	NUP88	Nuclear pore complex protein Nup88	Q99567 [33-58]	S(3): 85.9; T(5): 14.1; S(12): 0.0; S(13): 0.0; S(14): 0.0; S(17): 0.0; S(18): 0.0; T(25): 0.0	Q99567 1xPhospho [S35(85.9)]	2	-0.14	0.609919	0.36	0.238095	-0.5	0.166678
NLFNQELLSPSK	Q7Z2Z1	TICRR	Treslin	Q7Z2Z1 [915-926]	S(9): 100.0; S(11): 0.0	Q7Z2Z1 1xPhospho [S923(100)]	1	1.35	0.00580993	0.77	0.275276	0.58	0.166798
RQPSMSETMPLYTLCK	Q9Y5B0	CTDP1	RNA polymerase II subunit A C-terminal domain phosphatase	Q9Y5B0 [836-851]	S(4): 99.4; S(6): 0.6; T(8): 0.0; Y(12): 0.0; T(13): 0.0	Q9Y5B0 1xPhospho [S839(99.4)]	1	0.53	0.0174646	0.13	0.631438	0.4	0.166798
QDKPLSPAGSSQEAADTPDTR	P13994	CCDC130	Coiled-coil domain-containing protein 130	P13994 [357-377]	S(6): 100.0; S(10): 0.0; S(11): 0.0; T(17): 0.0; T(20): 0.0	P13994 1xPhospho [S362(100)]	1	-0.32	0.439185	0.58	0.326763	-0.89	0.167307
EEEQEDLTKDMDEPSPVPNVEEVTLPK	Q8TAQ2	SMARCC2	SWI/SNF complex subunit SMARCC2	Q8TAQ2 [333-359]	T(8): 0.0; S(15): 100.0; T(24): 0.0	Q8TAQ2 1xPhospho [S347(100)]	1	-0.55	0.0196152	-0.12	0.674186	-0.44	0.167307
NFSFMNPGMER	Q04759	PRKCQ	Protein kinase C theta type	Q04759 [693-703]	S(3): 100.0	Q04759 1xPhospho [S695(100)]	1	-0.71	0.0424733	-0.04	0.936691	-0.67	0.167307
AKDQNESLDEEMFYK	Q96AC1	FERMT2	Fermitin family homolog 2	Q96AC1 [660-674]	S(7): 100.0; Y(14): 0.0	Q96AC1 1xPhospho [S666(100)]	1	1.83	0.000225464	1.49	0.00659077	0.34	0.16767
GTEFAESADAALQGDPALQDAGDSSRK	P04921	GYPC	Glycophorin-C	P04921 [98-124]	T(2): 0.0; S(7): 0.0; S(24): 50.0; S(25): 50.0		4	-0.59	0.0726682	-0.07	0.914117	-0.52	0.16767
YYLKNSPDLGPIGGPPNGML	Q8TB72	PUM2	Pumilio homolog 2	Q8TB72 [1047-1066]	Y(1): 96.5; Y(2): 1.8; S(6): 1.8	Q8TB72 1xPhospho [Y1047(96.5)]	1	0.49	0.0678924	-0.04	0.933275	0.53	0.167963
TPMYGSQTPLQDGSRTPHYGSQTPLHDGSR	O00267	SUPT5H	Transcription elongation factor SPT5	O00267 [784-813]	T(1): 0.0; Y(4): 0.0; S(6): 0.1; T(8): 0.1; S(14): 19.4; T(16): 79.8; Y(19): 0.4; S(21): 0.0; T(23): 0.0; S(29): 0.0	O00267 1xPhospho [T799(79.8)]	1	-0.73	0.102628	0.12	0.80456	-0.85	0.167963
QGSITSPQANEQSVTPQRR	Q9UQ35	SRRM2	Serine/arginine repetitive matrix protein 2	Q9UQ35 [852-870]	S(3): 9.4; T(5): 9.4; S(6): 81.3; S(13): 0.0; T(15): 100.0	Q9UQ35 2xPhospho [S857(91.7); T866(99.9)]	4	0.02	0.970923	0.46	0.125891	-0.45	0.168283
VRPASTGGLSLLPPPPGGK	Q9NVZ3	NECAP2	Adaptin ear-binding coat-associated protein 2	Q9NVZ3 [177-195]	S(5): 50.0; T(6): 50.0; S(10): 0.0		3	1.41	0.00143783	0.91	0.0686185	0.49	0.168746
GLSDTPYDSSASYEK	Q13422	IKZF1	DNA-binding protein Ikaros	Q13422 [287-301]	S(3): 0.0; T(5): 0.0; Y(7): 0.0; S(9): 7.5; S(10): 92.5; S(12): 0.1; Y(13): 0.0	Q13422 1xPhospho [S296(92.4)]	1	1.29	0.00480672	1.78	0.00393924	-0.47	0.168746
YEPQSPGYEPR	Q9H5H4	ZNF768	Zinc finger protein 768	Q9H5H4 [121-131]	Y(1): 7.1; S(5): 92.9; Y(8): 0.0	Q9H5H4 1xPhospho [S125(92.9)]	2	-0.27	0.44884	0.26	0.322808	-0.53	0.168746
YGPADVEDTTGSGATDSKDDDDIDLFGSDDEEESEEAK	P24534	EEF1B2	Elongation factor 1-beta	P24534 [79-116]	Y(1): 0.0; T(9): 0.0; T(10): 0.0; S(12): 0.0; T(15): 0.0; S(17): 0.0; S(28): 100.0; S(34): 0.1	P24534 1xPhospho [S106(99.8)]	15	-0.19	0.300877	0.21	0.444749	-0.41	0.16898
EDASPLPHVCCCK	Q8NCE0	TSEN2	tRNA-splicing endonuclease subunit Sen2	Q8NCE0 [212-224]	S(4): 100.0	Q8NCE0 1xPhospho [S215(100)]	1	-0.1	0.726471	0.36	0.201491	-0.46	0.169059
ANSPSLFGTEGKPK	Q96B97	SH3KBP1	SH3 domain-containing kinase-binding protein 1	Q96B97 [585-598]	S(3): 99.5; S(5): 0.5; T(9): 0.0	Q96B97 1xPhospho [S587(99.5)]	4	0.35	0.0676323	-0.02	0.937188	0.37	0.16915
KIPDPDSDDVSEVDAR	P51532	SMARCA4	Transcription activator BRG1	P51532 [689-704]	S(7): 100.0; S(11): 0.0	P51532 1xPhospho [S695(100)]	7	-0.44	0.0543095	0	0.999171	-0.44	0.169376
SELNEIKENQRSPVR	Q13427	PPIG	Peptidyl-prolyl cis-trans isomerase G	Q13427 [386-400]	S(1): 0.0; S(12): 100.0	Q13427 1xPhospho [S397(100)]	1	-0.11	0.60324	0.25	0.245797	-0.36	0.16965
ERSPALKSPLQSVVVR	Q9Y2W1	THRAP3	Thyroid hormone receptor-associated protein 3	Q9Y2W1 [246-261]	S(3): 100.0; S(8): 0.0; S(12): 0.0	Q9Y2W1 1xPhospho [S248(100)]	1	0.1	0.604519	-0.39	0.245609	0.49	0.169993
SAEPSANTTLVSETEEEGSVPAFGAAAK	Q13428	TCOF1	Treacle protein	Q13428 [160-187]	S(1): 0.0; S(5): 0.0; T(8): 0.1; T(9): 0.3; S(12): 87.1; T(14): 12.5; S(19): 0.1		4	-0.32	0.145042	0.12	0.693001	-0.44	0.169993
IDSTEVIYQPR	Q15831	STK11	Serine/threonine-protein kinase STK11	Q15831 [29-39]	S(3): 3.1; T(4): 96.9; Y(8): 0.0	Q15831 1xPhospho [T32(96.9)]	2	-0.41	0.0785949	0	0.89596	-0.42	0.170283
LEGQATAVTPNKNSSCGGGISSSSSSR	Q9BXB4	OSBPL11	Oxysterol-binding protein-related protein 11	Q9BXB4 [19-45]	T(6): 3.2; T(9): 96.0; S(14): 0.6; S(15): 0.1; S(21): 0.0; S(22): 0.0; S(23): 0.0; S(24): 0.0; S(25): 0.0; S(26): 0.0	Q9BXB4 1xPhospho [T27(96)]	1	1.99	0.00104186	1.43	0.0467365	0.56	0.170492
LFQGYETEEREETELSEK	Q68DK7	MSL1	Male-specific lethal 1 homolog	Q68DK7 [282-299]	Y(5): 49.9; T(7): 49.9; T(13): 0.2; S(16): 0.0		1	0.35	0.117006	-0.14	0.765211	0.49	0.170492
TPSPLVLEGTIEQSSPPLSPTTK	P33241	LSP1	Lymphocyte-specific protein 1	P33241 [175-197]	T(1): 1.6; S(3): 98.4; T(10): 0.0; S(14): 0.2; S(15): 99.7; S(19): 0.0; T(21): 0.0; T(22): 0.0	P33241 2xPhospho [S177(98.4); S189(99.7)]	1	-0.14	0.598258	0.39	0.249074	-0.53	0.170644
LAALALASSENSSSTPEECEEMSEKPK	O00567	NOP56	Nucleolar protein 56	O00567 [454-480]	S(8): 0.0; S(9): 0.0; S(12): 0.0; S(13): 1.3; S(14): 10.3; T(15): 87.2; S(23): 1.3	O00567 1xPhospho [T468(87.2)]	1	-0.63	0.0223262	-0.13	0.71241	-0.5	0.170644
EKPAWLQAELEQSHPR	O95613	PCNT	Pericentrin	O95613 [2866-2881]	S(13): 100.0	O95613 1xPhospho [S2878(100)]	1	0.71	0.0157075	0.23	0.578968	0.48	0.170711
NLEQILNGGESPK	Q13033	STRN3	Striatin-3	Q13033 [219-231]	S(11): 100.0	Q13033 1xPhospho [S229(100)]	3	-0.19	0.420918	0.25	0.346255	-0.44	0.171119
SPESRPSVVYPSTK	P42694	HELZ	Probable helicase with zinc finger domain	P42694 [1317-1330]	S(1): 100.0; S(4): 0.1; S(7): 0.0; Y(10): 0.0; S(12): 0.0; T(13): 0.0	P42694 1xPhospho [S1317(100)]	1	0.01	0.970591	0.39	0.127829	-0.37	0.171198
MPQDGSDDEDEEWPTLEK	Q13895	BYSL	Bystin	Q13895 [93-110]	S(6): 100.0; T(15): 0.0	Q13895 1xPhospho [S98(100)]	9	0.11	0.518025	-0.27	0.289046	0.37	0.171543
WSPIASTLPELVQR	Q13561	DCTN2	Dynactin subunit 2	Q13561 [319-332]	S(2): 100.0; S(6): 0.0; T(7): 0.0	Q13561 1xPhospho [S320(100)]	2	-0.2	0.334304	0.21	0.415156	-0.4	0.171844
TKSQGPSLDLSALK	O95466	FMNL1	Formin-like protein 1	O95466 [683-696]	T(1): 8.2; S(3): 91.8; S(7): 0.0; S(11): 0.0	O95466 1xPhospho [S685(91.8)]	2	-0.02	0.939193	0.43	0.148531	-0.46	0.172079
SGSPRPTEPTDFLMLFEGSPSGK	Q9UPN4	AZI1; CEP131	Centrosomal protein of 131 kDa	Q9UPN4 [87-109]	S(1): 0.0; S(3): 0.0; T(7): 0.0; T(10): 0.0; S(19): 91.4; S(21): 8.6	Q9UPN4 1xPhospho [S89(92.1)]	9	-0.43	0.0424116	-0.03	0.924199	-0.39	0.172289
TGDLGIPPNPEDRSPSPEPIYNSEGK	Q15637	SF1	Splicing factor 1	Q15637 [67-92]	T(1): 0.0; S(14): 100.0; S(16): 99.9; Y(21): 0.1; S(23): 0.0	Q15637 2xPhospho [S80(99.6); S82(84.8)]	28	-0.59	0.0415515	-0.04	0.919025	-0.55	0.172289
NVAKPSPVVGQLIDLSSPLIQLSPEADKENVDSPLLK	Q9NYZ3	GTSE1	G2 and S phase-expressed protein 1	Q9NYZ3 [683-719]	S(6): 0.0; S(16): 0.0; S(17): 0.0; S(23): 97.6; S(33): 2.4	Q9NYZ3 1xPhospho [S705(97.6)]	1	-1.17	0.000301496	-0.73	0.00978126	-0.44	0.172289
NLSRTPSSCSSSLDSIK	Q8NG31	CASC5	Protein CASC5	Q8NG31 [1839-1855]	S(3): 91.3; T(5): 8.7; S(7): 33.1; S(8): 33.1; S(10): 33.1; S(11): 0.3; S(12): 0.3; S(15): 0.0	Q8NG31 2xPhospho [S1841(91.3); S/T]	1	0.82	0.0389206	0.08	0.900188	0.74	0.172402
DGLNDDDFEPYLSPQAR	Q9Y5A9	YTHDF2	YTH domain-containing family protein 2	Q9Y5A9 [27-43]	Y(11): 0.0; S(13): 100.0	Q9Y5A9 1xPhospho [S39(100)]	3	0.56	0.0236743	0.17	0.726815	0.39	0.172402
GQGAILALAGDLAYQTLPLR	Q9H400	LIME1	Lck-interacting transmembrane adapter 1	Q9H400 [222-241]	Y(14): 8.0; T(16): 92.0	Q9H400 1xPhospho [T237(92)]	1	-0.34	0.217494	0.23	0.560803	-0.57	0.17274
SRSPHEAGFCVYLK	Q9NTZ6	RBM12	RNA-binding protein 12	Q9NTZ6 [422-435]	S(1): 100.0; S(3): 100.0; Y(12): 0.0	Q9NTZ6 2xPhospho [S422(100); S424(100)]	4	-0.36	0.0812899	0.03	0.893184	-0.39	0.172894
AASPSPQSVR	Q8IYB3	SRRM1	Serine/arginine repetitive matrix protein 1	Q8IYB3 [736-745]	S(3): 89.3; S(5): 9.6; S(8): 1.2	Q8IYB3 1xPhospho [S738(89.2)]	4	0.08	0.780081	0.55	0.0955059	-0.47	0.173003
LSSDATVLTPNTESSCDLMTK	Q63HQ0	AP1AR	AP-1 complex-associated regulatory protein	Q63HQ0 [173-193]	S(2): 0.0; S(3): 0.0; T(6): 0.0; T(9): 0.0; T(12): 0.6; S(14): 49.7; S(15): 49.7; T(20): 0.0		2	-0.73	0.0129294	-0.22	0.505902	-0.5	0.173038
LFSQGQDVSNK	P55196	MLLT4	Afadin	P55196 [1797-1807]	S(3): 100.0; S(9): 0.0	P55196 1xPhospho [S1799(100)]	1	1	0.0523694	1.6	0.0130295	-0.6	0.173112
SALTVQFVTGSFIEK	P61225	RAP2B	Ras-related protein Rap-2b	P61225 [17-31]	S(1): 0.0; T(4): 0.0; T(9): 0.0; S(11): 100.0	P61225 1xPhospho [S27(100)]	1	0.71	0.0370459	1.13	0.0106651	-0.42	0.173112
GWDLVDAVTPGPQPTLEQLEEGGPRPLER	Q27J81	INF2	Inverted formin-2	Q27J81 [1046-1074]	T(9): 99.9; T(15): 0.1	Q27J81 1xPhospho [T1054(99.9)]	1	0.65	0.0357794	0.1	0.869253	0.54	0.173112
KQSSSEISLAVER	P48634	PRRC2A	Protein PRRC2A	P48634 [454-466]	S(3): 47.2; S(4): 47.2; S(5): 5.6; S(8): 0.0		2	0.14	0.445143	-0.28	0.335164	0.41	0.173112
DGLNQTTIPVSPPSTTKPSR	Q71RC2	LARP4	La-related protein 4	Q71RC2 [573-592]	T(6): 0.0; T(7): 0.0; S(11): 100.0; S(14): 0.0; T(15): 0.0; T(16): 0.0; S(19): 0.0	Q71RC2 1xPhospho [S583(100)]	4	-0.18	0.332965	0.2	0.421129	-0.38	0.173112
VVEAVNSDSDSEFGIPK	Q02880	TOP2B	DNA topoisomerase 2-beta	Q02880 [1516-1532]	S(7): 94.8; S(9): 52.6; S(11): 52.6	Q02880 2xPhospho [S1522(94.8); S]	1	-0.37	0.33434	0.34	0.418968	-0.71	0.173112
TLSVAAAFNEDEDSEPEEMPPEAK	Q8WW12	PCNP	PEST proteolytic signal-containing nuclear protein	Q8WW12 [106-129]	T(1): 0.0; S(3): 0.0; S(14): 100.0	Q8WW12 1xPhospho [S119(100)]	10	-0.44	0.0458459	-0.03	0.945136	-0.42	0.173112
TPEGDASPSTPEENETTTTSAFTIQEYFAK	Q96BK5	PINX1	PIN2/TERF1-interacting telomerase inhibitor 1	Q96BK5 [155-184]	T(1): 0.0; S(7): 2.1; S(9): 61.1; T(10): 10.9; T(16): 10.9; T(17): 10.9; T(18): 2.1; T(19): 2.1; S(20): 0.1; T(23): 0.0; Y(27): 0.0		2	-0.76	0.0129347	-0.22	0.505672	-0.53	0.173112
AEPSPQSWSSLWK	Q8WXH0	SYNE2	Nesprin-2	Q8WXH0 [4133-4145]	S(4): 99.6; S(7): 0.4; S(9): 0.0; S(10): 0.0	Q8WXH0 1xPhospho [S4136(99.6)]	1	0.68	0.0253468	0.17	0.7496	0.51	0.173351
TVSDNSLSNSR	Q96RU3	FNBP1	Formin-binding protein 1	Q96RU3 [294-304]	T(1): 1.1; S(3): 98.7; S(6): 0.1; S(8): 0.0; S(10): 0.0	Q96RU3 1xPhospho [S296(98.7)]	2	-0.38	0.058042	0.02	0.990771	-0.41	0.173351
RRSIQDLTVTGTEPGQVSSR	O43318	MAP3K7	Mitogen-activated protein kinase kinase kinase 7	O43318 [437-456]	S(3): 99.7; T(8): 0.3; T(10): 0.0; T(12): 0.2; S(18): 11.5; S(19): 88.2	O43318 2xPhospho [S439(99.7); S455(88.2)]	2	0.84	0.00356127	0.45	0.170571	0.39	0.17381
NSYNNSQAPSPGLGSK	Q9UHB7	AFF4	AF4/FMR2 family member 4	Q9UHB7 [1034-1049]	S(2): 0.0; Y(3): 0.0; S(6): 0.0; S(10): 100.0; S(15): 0.0	Q9UHB7 1xPhospho [S1043(99.9)]	3	0.8	0.0431866	1.33	0.0116493	-0.52	0.17381
VIDLTHDNKDDLQAAIALSLLESPKIQADGR	Q96RU2	USP28	Ubiquitin carboxyl-terminal hydrolase 28	Q96RU2 [91-121]	T(5): 0.0; S(19): 0.0; S(23): 100.0	Q96RU2 1xPhospho [S113(100)]	1	0.76	0.0155069	0.24	0.564586	0.52	0.17381
AEGAGRPPPATPPRPPPSTSAVR	Q9BQ89	FAM110A	Protein FAM110A	Q9BQ89 [130-152]	T(11): 100.0; S(18): 0.0; T(19): 0.0; S(20): 0.0	Q9BQ89 1xPhospho [T140(100)]	2	0.76	0.0023818	0.38	0.115793	0.37	0.17381
KQEDSVTELTVEDSGESLEDLMAK	Q9GZZ9	UBA5	Ubiquitin-like modifier-activating enzyme 5	Q9GZZ9 [377-400]	S(5): 97.5; T(7): 2.4; T(10): 0.1; S(14): 0.0; S(17): 0.0		2	0.48	0.057433	0	0.994547	0.49	0.17381
EWSLESSPAQNWTPPQPR	Q8N6T3	ARFGAP1	ADP-ribosylation factor GTPase-activating protein 1	Q8N6T3 [123-140]	S(3): 0.0; S(6): 0.0; S(7): 0.0; T(13): 100.0	Q8N6T3 1xPhospho [T135(100)]	3	0.2	0.556905	-0.69	0.275081	0.9	0.17381
SSSPIPLTPSKEGSAVFAGFEGR	Q8N5Y2	MSL3	Male-specific lethal 3 homolog	Q8N5Y2 [398-420]	S(1): 7.8; S(2): 46.1; S(3): 46.1; T(8): 99.4; S(10): 0.6; S(14): 0.0	Q8N5Y2 2xPhospho [T405(99.4); S]	2	-0.48	0.0299576	-0.12	0.807001	-0.35	0.17381
AQSLVISPPAPSPR	P46013	MKI67	Antigen KI-67	P46013 [573-586]	S(3): 0.0; S(7): 100.0; S(12): 0.0	P46013 1xPhospho [S579(100)]	1	-0.67	0.00658312	-0.21	0.292499	-0.44	0.17381
SAEPRPELGPGQETGTNSR	Q9Y4B5	SOGA2; MTCL1	Microtubule cross-linking factor 1	Q9Y4B5 [1791-1809]	S(1): 0.0; T(14): 0.2; T(16): 1.5; S(18): 98.4	Q9Y4B5 1xPhospho [S1808(98.4)]	1	0.1	0.795836	0.71	0.0987731	-0.61	0.173958
NLAQIFLEDFCSPR	Q9H6L4	ARMC7	Armadillo repeat-containing protein 7	Q9H6L4 [158-171]	S(12): 100.0	Q9H6L4 1xPhospho [S169(100)]	1	1.02	0.010968	0.43	0.444534	0.6	0.174064
AVAGVMITASHNR	Q6PCE3	PGM2L1	Glucose 1,6-bisphosphate synthase	Q6PCE3 [166-178]	T(8): 0.0; S(10): 100.0	Q6PCE3 1xPhospho [S175(100)]	6	0.16	0.363665	0.46	0.0457729	-0.31	0.174064
TVEDLKNNESQWKDSPLATR	O95155	UBE4B	Ubiquitin conjugation factor E4 B	O95155 [789-808]	T(1): 0.0; S(10): 1.5; S(15): 98.3; T(19): 0.2	O95155 1xPhospho [S803(98.3)]	1	0.14	0.389515	-0.26	0.374962	0.41	0.174064
AGGGPTLQCPPPSSPEK	Q96N66	MBOAT7	Lysophospholipid acyltransferase 7	Q96N66 [272-288]	T(6): 0.0; S(13): 50.0; S(14): 50.0		4	-0.03	0.908382	0.39	0.15891	-0.41	0.174071
SEVQQPVHPKPLSPDSR	Q9UHB6	LIMA1	LIM domain and actin-binding protein 1	Q9UHB6 [350-366]	S(1): 0.0; S(13): 50.0; S(16): 50.0		1	-0.01	0.952622	0.32	0.148311	-0.33	0.174241
LFGHAQLIQSDDDIGDHQPFANAHDVLAR	Q9NQ34	TMEM9B	Transmembrane protein 9B	Q9NQ34 [133-161]	S(10): 100.0	Q9NQ34 1xPhospho [S142(100)]	1	-0.22	0.53611	0.3	0.286916	-0.53	0.174241
SSCVSLGETAASYYGSCK	Q13370	PDE3B	cGMP-inhibited 3',5'-cyclic phosphodiesterase B	Q13370 [295-312]	S(1): 0.0; S(2): 0.5; S(5): 98.9; T(9): 0.5; S(12): 0.0; Y(13): 0.0; Y(14): 0.0; S(16): 0.0	Q13370 1xPhospho [S299(98.9)]	3	-0.32	0.120621	0.12	0.767306	-0.43	0.174241
TSPSSPAPLPHQEATPR	P04920	SLC4A2	Anion exchange protein 2	P04920 [169-185]	T(1): 6.0; S(2): 93.6; S(4): 0.4; S(5): 0.0; T(15): 0.0	P04920 1xPhospho [S170(93.6)]	6	-0.54	0.07409	0.06	0.925584	-0.61	0.174241
NSDDAPWSPK	Q9UPP1	PHF8	Histone lysine demethylase PHF8	Q9UPP1 [873-882]	S(2): 0.0; S(8): 100.0	Q9UPP1 1xPhospho [S880(100)]	1	0.06	0.812116	0.44	0.101711	-0.37	0.174255
RPKEEEWDPEYTPK	Q9NYF8	BCLAF1	Bcl-2-associated transcription factor 1	Q9NYF8 [829-842]	Y(11): 50.0; T(12): 50.0		1	2.7	0.0104019	1.54	0.425318	1.16	0.174642
RASPPDPSPSPSAASASER	Q9Y2F5	KIAA0947; ICE1	Little elongation complex subunit 1	Q9Y2F5 [1690-1708]	S(3): 100.0; S(8): 0.0; S(10): 0.0; S(12): 0.0; S(15): 0.0; S(17): 0.0	Q9Y2F5 1xPhospho [S1692(100)]	1	-0.22	0.361497	0.16	0.40245	-0.38	0.174642
DSSGQEDETQSSNDDPSQSVASQDAQEIIRPR	Q8N108	MIER1	Mesoderm induction early response protein 1	Q8N108 [120-151]	S(2): 0.0; S(3): 0.0; T(9): 0.0; S(11): 84.6; S(12): 15.3; S(17): 0.1; S(19): 0.0; S(22): 0.0	Q8N108 1xPhospho [S130(84.6)]	1	-0.46	0.114645	0.11	0.788505	-0.56	0.174642
EREDSGDAEAHAFK	Q9NPI1	BRD7	Bromodomain-containing protein 7	Q9NPI1 [275-288]	S(5): 100.0	Q9NPI1 1xPhospho [S279(100)]	2	-0.26	0.370216	0.27	0.39393	-0.54	0.174893
EAKPGAAEPEVGVPSSLSPSSPSSSWTETDVEER	Q6L8Q7	PDE12	2',5'-phosphodiesterase 12	Q6L8Q7 [200-233]	S(15): 16.9; S(16): 73.0; S(18): 73.0; S(20): 16.9; S(21): 16.9; S(23): 2.8; S(24): 0.5; S(25): 0.1; T(27): 0.0; T(29): 0.0		3	-0.21	0.328957	0.2	0.431928	-0.41	0.174963
KNSLYSTDFIVFNDNDGSDDENDDKDK	O60281	ZNF292	Zinc finger protein 292	O60281 [637-663]	S(3): 0.0; Y(5): 0.0; S(6): 0.0; T(7): 0.0; S(18): 100.0	O60281 1xPhospho [S654(100)]	1	-0.47	0.100654	0.08	0.833831	-0.56	0.174963
DSSSQENMVEDCLYETVK	Q9NWQ8	PAG1	Phosphoprotein associated with glycosphingolipid-enriched microdomains 1	Q9NWQ8 [168-185]	S(2): 3.4; S(3): 48.3; S(4): 48.3; Y(14): 0.0; T(16): 0.0		6	-0.55	0.0257565	-0.09	0.747242	-0.46	0.17544
IDSVAAQPTATSPVVYTRPAISSFSSSGIGFGESLK	P49790	NUP153	Nuclear pore complex protein Nup153	P49790 [622-657]	S(3): 0.3; T(9): 4.6; T(11): 4.6; S(12): 4.6; Y(16): 4.6; T(17): 18.1; S(22): 18.1; S(23): 18.1; S(25): 4.6; S(26): 4.6; S(27): 18.1; S(34): 0.0		1	0.75	0.00429865	0.39	0.197521	0.36	0.175648
PTSAPAITQGQVAEGGVLDASAK	P11171	EPB41	Protein 4.1	P11171 [558-580]	T(2): 50.0; S(3): 50.0; T(8): 0.1; S(21): 0.0		1	0.42	0.237342	0.96	0.0336994	-0.54	0.175648
RRLSEQLAHTPTAFK	Q9UBF8	PI4KB	Phosphatidylinositol 4-kinase beta	Q9UBF8 [508-522]	S(4): 99.0; T(10): 1.0; T(12): 0.0	Q9UBF8 1xPhospho [S511(99)]	2	-0.21	0.302541	-0.74	0.0401063	0.52	0.176083
RQQPPLGPSSSLLSLPGLK	Q4KMP7	TBC1D10B	TBC1 domain family member 10B	Q4KMP7 [648-666]	S(9): 4.1; S(10): 48.2; S(11): 48.2; S(14): 99.6	Q4KMP7 2xPhospho [S661(99.6); S]	2	-0.38	0.0830442	0	0.897881	-0.38	0.176083
QDQISGLSQSEVK	Q99590	SCAF11	Protein SCAF11	Q99590 [526-538]	S(5): 0.0; S(8): 95.6; S(10): 4.4	Q99590 1xPhospho [S533(95.6)]	2	0.75	0.00764995	1.08	0.0050579	-0.33	0.176089
DGDGVPGGGPLSPAR	Q92888	ARHGEF1	Rho guanine nucleotide exchange factor 1	Q92888 [852-866]	S(12): 100.0	Q92888 1xPhospho [S863(100)]	1	1.17	0.000549953	0.86	0.0213426	0.31	0.176366
AVAAAAAAAVTPAAIAAATTTLAQEEPVAAPEPK	Q8IYB3	SRRM1	Serine/arginine repetitive matrix protein 1	Q8IYB3 [836-869]	T(11): 99.7; T(19): 0.1; T(20): 0.1; T(21): 0.1	Q8IYB3 1xPhospho [T846(85.1)]	7	0.6	0.040303	0.08	0.898097	0.52	0.176366
ASLGTGTASPR	Q9UBW5	BIN2	Bridging integrator 2	Q9UBW5 [450-460]	S(2): 0.0; T(5): 0.0; T(7): 0.0; S(9): 100.0	Q9UBW5 1xPhospho [S458(100)]	2	0.29	0.323038	0.73	0.0422436	-0.43	0.176366
LNSPPSSIYK	Q53EP0	FNDC3B	Fibronectin type III domain-containing protein 3B	Q53EP0 [206-215]	S(3): 0.4; S(6): 99.6; S(7): 0.0; Y(9): 0.0	Q53EP0 1xPhospho [S211(99.6)]	1	0.28	0.307706	0.86	0.0407233	-0.58	0.176366
KEIEESKEPGVEDTEWSNTQTEEAIQTR	Q99986	VRK1	Serine/threonine-protein kinase VRK1	Q99986 [360-387]	S(6): 0.0; T(14): 0.2; S(17): 88.9; T(19): 10.7; T(21): 0.2; T(27): 0.0	Q99986 1xPhospho [S376(97.5)]	4	-0.17	0.366947	0.19	0.402217	-0.36	0.176753
SPGNVNNTIVVPLLEDGR	Q9Y4X4	KLF12	Krueppel-like factor 12	Q9Y4X4 [202-219]	S(1): 100.0; T(8): 0.0	Q9Y4X4 1xPhospho [S202(100)]	5	-0.05	0.782716	0.2	0.194276	-0.24	0.176905
SKSLGDLTSEDIACNFESK	Q4KWH8	PLCH1	1-phosphatidylinositol 4,5-bisphosphate phosphodiesterase eta-1	Q4KWH8 [1492-1510]	S(1): 88.5; S(3): 11.1; T(8): 0.2; S(9): 0.2; S(18): 0.0	Q4KWH8 1xPhospho [S1492(88.5)]	1	0.14	0.741788	0.72	0.0929802	-0.59	0.177202
SPSPPLPTHIPPEPPRTPPFPAK	Q8IZ21	PHACTR4	Phosphatase and actin regulator 4	Q8IZ21 [342-364]	S(1): 97.9; S(3): 15.2; T(8): 86.9; T(17): 100.0	Q8IZ21 3xPhospho [S342(87.9); T349(86.9); T358(100)]	2	0.31	0.123021	-0.08	0.768625	0.39	0.177497
AENAEGQTPAIGPDGEPLDETSQMSDLPVK	P51532	SMARCA4	Transcription activator BRG1	P51532 [589-618]	T(8): 0.0; T(21): 54.1; S(22): 54.1; S(25): 91.8		3	-1.18	0.00227304	-0.51	0.106956	-0.67	0.177538
NDVGGGGSESQELVPRPGGNNK	Q8TAD8	SNIP1	Smad nuclear-interacting protein 1	Q8TAD8 [193-214]	S(8): 9.1; S(10): 90.9	Q8TAD8 1xPhospho [S200(98.6)]	2	0.47	0.13397	0.91	0.0241889	-0.45	0.177622
EKDSPHMQDPNQADEEAMTQIIR	P23511	NFYA	Nuclear transcription factor Y subunit alpha	P23511 [323-345]	S(4): 100.0; T(19): 0.0	P23511 1xPhospho [S326(100)]	2	-0.31	0.128096	0.02	0.757807	-0.33	0.177944
NSPGLLVSPGNLNK	Q06413	MEF2C	Myocyte-specific enhancer factor 2C	Q06413 [221-234]	S(2): 100.0; S(8): 100.0	Q06413 2xPhospho [S222(100); S228(100)]	1	1.54	0.00892544	0.73	0.372996	0.81	0.178219
RSLEQNIQLPAALLSR	P33993	MCM7	DNA replication licensing factor MCM7	P33993 [499-514]	S(2): 100.0; S(15): 0.0	P33993 1xPhospho [S500(100)]	1	0.5	0.0385923	0.07	0.87903	0.42	0.17829
YGGISTASVDFEQPTR	P98175	RBM10	RNA-binding protein 10	P98175 [838-853]	Y(1): 7.1; S(5): 0.6; T(6): 0.6; S(8): 91.7; T(15): 0.0	P98175 1xPhospho [S845(91.7)]	1	0.38	0.0770339	-0.05	0.922772	0.43	0.17829
RLSLPGLLSQVSPR	Q96Q42	ALS2	Alsin	Q96Q42 [481-494]	S(3): 100.0; S(9): 0.0; S(12): 100.0	Q96Q42 2xPhospho [S483(100); S492(100)]	2	-0.63	0.0338472	-0.1	0.833831	-0.54	0.178736
SPLAQMEEERR	Q16181	SEPT7	Septin-7	Q16181 [334-344]	S(1): 100.0	Q16181 1xPhospho [S334(100)]	1	0.79	0.0923238	-0.18	0.869951	0.97	0.178778
ATSPGPTDLETR	Q5VT06	CEP350	Centrosome-associated protein 350	Q5VT06 [1816-1827]	T(2): 46.7; S(3): 46.7; T(7): 6.5; T(11): 0.0		1	0.05	0.857835	0.44	0.112258	-0.39	0.178837
SETAPAETATPAPVEKSPAK	P16401	HIST1H1B	Histone H1.5	P16401 [2-21]	S(1): 0.0; T(3): 0.0; T(8): 0.0; T(10): 100.0; S(17): 100.0	P16401 2xPhospho [T11(100); S18(100)]	1	1.28	0.0068212	0.6	0.290798	0.69	0.178901
GVHDLEKDNFFSLTPK	Q562F6	SGOL2	Shugoshin-like 2	Q562F6 [832-847]	S(12): 0.1; T(14): 99.9	Q562F6 1xPhospho [T845(99.9)]	1	0.52	0.0552507	0	0.982872	0.51	0.178901
ESRQEEEDRDSPGPQVPDPK	Q6NSJ2	PHLDB3	Pleckstrin homology-like domain family B member 3	Q6NSJ2 [244-263]	S(2): 0.0; S(11): 100.0	Q6NSJ2 1xPhospho [S254(100)]	1	0.43	0.221549	0.93	0.0328435	-0.5	0.178901
LNDPFQPFPGNDSPK	P42566	EPS15	Epidermal growth factor receptor substrate 15	P42566 [802-816]	S(13): 100.0	P42566 1xPhospho [S814(100)]	1	-0.68	0.0272404	-0.1	0.755831	-0.56	0.178901
TPQSPTLPPAK	P78310	CXADR	Coxsackievirus and adenovirus receptor	P78310 [329-339]	T(1): 0.6; S(4): 0.6; T(6): 98.8	P78310 1xPhospho [T334(98.8)]	1	-1.24	0.000657664	-0.66	0.025433	-0.58	0.178901
ALSSAGPIPIRPPIVPVK	Q765P7	MTSS1L	MTSS1-like protein	Q765P7 [577-594]	S(3): 90.7; S(4): 9.3	Q765P7 1xPhospho [S579(90.3)]	2	0.28	0.439185	-0.26	0.352482	0.53	0.179058
SPGSPVGEGTGSPPK	P35611	ADD1	Alpha-adducin	P35611 [355-369]	S(1): 50.0; S(4): 50.0; T(10): 0.0; S(12): 0.0		4	-0.23	0.219299	0.14	0.578618	-0.39	0.179058
FISTYSWADAEEEKCELK	Q12912	LRMP	Lymphoid-restricted membrane protein	Q12912 [422-439]	S(3): 0.0; T(4): 4.2; Y(5): 47.9; S(6): 47.9		1	-0.58	0.0442334	-1.43	0.0121482	0.86	0.179058
GIQNIDPESDPYVTPGSVLGGTATSPIVDTDHQLLR	Q9UPQ9	TNRC6B	Trinucleotide repeat-containing gene 6B protein	Q9UPQ9 [1488-1523]	S(9): 0.0; Y(12): 0.0; T(14): 0.1; S(17): 2.8; T(22): 13.6; T(24): 13.6; S(25): 69.4; T(30): 0.6		3	0.56	0.0634399	0.01	0.982872	0.55	0.179119
VPLAPITDPQQLQLSPLK	P31350	RRM2	Ribonucleoside-diphosphate reductase subunit M2	P31350 [6-23]	T(7): 0.0; S(15): 100.0	P31350 1xPhospho [S20(100)]	4	-0.32	0.186164	0.15	0.635518	-0.46	0.17938
IDYQGRPSGGFVISGVLSPDTISSK	Q03188	CENPC; CENPC1	Centromere protein C	Q03188 [756-780]	Y(3): 2.3; S(8): 97.7; S(14): 0.0; S(18): 2.2; T(21): 93.4; S(23): 2.2; S(24): 2.2	Q03188 2xPhospho [S763(97.7); T776(93.4)]	1	0.83	0.0243523	0.24	0.712962	0.6	0.179831
SSLGDMFSPIRDDAVVNK	Q8NHV4	NEDD1	Protein NEDD1	Q8NHV4 [404-421]	S(1): 0.0; S(2): 0.1; S(8): 99.9	Q8NHV4 1xPhospho [S411(99.8)]	1	0.67	0.00879319	0.27	0.365423	0.39	0.179832
DAPTSPASVASSSSTPSSK	Q04726	TLE3	Transducin-like enhancer protein 3	Q04726 [282-300]	T(4): 49.9; S(5): 49.9; S(8): 0.3; S(11): 0.0; S(12): 0.0; S(13): 0.0; S(14): 0.0; T(15): 0.0; S(17): 0.0; S(18): 0.0	Q04726 1xPhospho [S289(87)]	3	0.26	0.347614	0.64	0.0457729	-0.39	0.179832
SPSPPLPTHIPPEPPRTPPFPAK	Q8IZ21	PHACTR4	Phosphatase and actin regulator 4	Q8IZ21 [342-364]	S(1): 11.5; S(3): 88.7; T(8): 88.5; T(17): 11.3	Q8IZ21 2xPhospho [S344(86.4); T349(97)]	5	-0.5	0.0383376	-0.03	0.872023	-0.47	0.179832
TAATAAAAAAEPPAPPPPPPPEEDPEQDSGPEDLPLVR	P06400	RB1	Retinoblastoma-associated protein	P06400 [9-46]	T(1): 0.0; T(4): 0.0; S(29): 100.0	P06400 1xPhospho [S37(100)]	12	-0.63	0.0306212	-0.08	0.796334	-0.55	0.179832
RIPSIVSSPLNSPLDRSGIDITDFQAK	P49790	NUP153	Nuclear pore complex protein Nup153	P49790 [327-353]	S(4): 0.2; S(7): 16.0; S(8): 83.2; S(12): 4.4; S(17): 95.5; T(22): 0.8	P49790 2xPhospho [S334(83.2); S343(95.4)]	1	2.06	0.00114907	2.46	0.00214882	-0.4	0.180119
SSVKTPETVVPAAPELQPSTSTDQPVTPEPTSR	Q14676	MDC1	Mediator of DNA damage checkpoint protein 1	Q14676 [1522-1554]	S(1): 33.3; S(2): 33.3; T(5): 33.3; T(8): 0.0; S(19): 0.0; T(20): 0.0; S(21): 0.0; T(22): 0.0; T(27): 94.0; T(31): 3.0; S(32): 3.0	Q14676 2xPhospho [T1548(94); S/T]	1	0.46	0.0629736	-0.03	0.986344	0.49	0.180294
SSSVSPSASFR	Q04727	TLE4	Transducin-like enhancer protein 4	Q04727 [204-214]	S(1): 0.0; S(2): 0.1; S(3): 0.3; S(5): 1.7; S(7): 97.7; S(9): 0.3	Q04727 1xPhospho [S210(97.7)]	3	-0.13	0.516981	0.24	0.307978	-0.37	0.180311
TSSEEEDSRREEPSLLLVLK	O43314	PPIP5K2	Inositol hexakisphosphate and diphosphoinositol-pentakisphosphate kinase 2	O43314 [491-510]	T(1): 5.5; S(2): 47.2; S(3): 47.2; S(8): 0.1; S(14): 0.0		2	-0.78	0.00222096	-0.37	0.102641	-0.41	0.180502
AKDQNESLDEEMFYK	Q96AC1	FERMT2	Fermitin family homolog 2	Q96AC1 [660-674]	S(7): 100.0; Y(14): 0.0	Q96AC1 1xPhospho [S666(100)]	2	1.88	0.00148897	1.34	0.0658484	0.53	0.180666
ASTFPPAPVPGEPVTPPSK	Q5T011	SZT2	Protein SZT2	Q5T011 [2420-2438]	S(2): 0.0; T(3): 0.0; T(15): 99.9; S(18): 0.1	Q5T011 1xPhospho [T2434(99.9)]	1	1.18	0.000812522	0.81	0.032039	0.37	0.180666
SLSNPTPDYCHDK	Q8NG31	CASC5	Protein CASC5	Q8NG31 [765-777]	S(1): 6.0; S(3): 94.0; T(6): 0.0; Y(9): 0.0		4	1.02	0.0123677	0.41	0.467202	0.6	0.180666
VVPGQFDDADSSDSENRDLK	Q9BRS2	RIOK1	Serine/threonine-protein kinase RIO1	Q9BRS2 [11-30]	S(11): 99.2; S(12): 91.8; S(14): 9.0	Q9BRS2 2xPhospho [S21(99.2); S22(91.8)]	1	0.02	0.977526	0.66	0.137933	-0.64	0.180666
RVVEDEGSSVEMEQK	Q8N4S0	CCDC82	Coiled-coil domain-containing protein 82	Q8N4S0 [212-226]	S(8): 89.8; S(9): 10.2	Q8N4S0 1xPhospho [S219(89.8)]	1	-0.41	0.087482	0.03	0.895363	-0.44	0.180666
QASASYDSEEEEEGLPMSYDEK	Q15059	BRD3	Bromodomain-containing protein 3	Q15059 [556-577]	S(3): 10.7; S(5): 10.7; Y(6): 10.7; S(8): 67.8; S(18): 0.0; Y(19): 0.0		3	-0.55	0.0866166	0.04	0.898097	-0.59	0.180666
REESPMDVDQPSPSAQDTQSIASDGTPQGEK	Q7Z6Z7	HUWE1	E3 ubiquitin-protein ligase HUWE1	Q7Z6Z7 [3805-3835]	S(4): 0.0; S(12): 97.9; S(14): 2.1; T(18): 0.0; S(20): 0.0; S(23): 0.0; T(26): 0.0		2	-0.59	0.0611291	0.01	0.994547	-0.59	0.180666
KAVPVESPVQKV	Q8TB61	SLC35B2	Adenosine 3'-phospho 5'-phosphosulfate transporter 1	Q8TB61 [421-432]	S(7): 100.0	Q8TB61 1xPhospho [S427(100)]	1	0.5	0.0245617	0.14	0.712558	0.35	0.180807
AGLESGAEPGDGDSDTTKK	O60832	DKC1	H/ACA ribonucleoprotein complex subunit 4	O60832 [481-499]	S(5): 0.0; S(14): 100.0; T(16): 0.0; T(17): 0.0	O60832 1xPhospho [S494(100)]	3	0.03	0.921613	0.46	0.126785	-0.42	0.180936
LSQTFLQLSDGDK	Q92608	DOCK2	Dedicator of cytokinesis protein 2	Q92608 [1783-1795]	S(2): 3.8; T(4): 96.2; S(9): 0.0	Q92608 1xPhospho [T1786(96.2)]	9	1.74	0.000530395	2.06	0.00132178	-0.32	0.18104
SLLGDSAPTLHLNKGTPSQSPVVGR	P52594	AGFG1	Arf-GAP domain and FG repeat-containing protein 1	P52594 [162-186]	S(1): 0.0; S(6): 0.0; T(9): 0.0; T(16): 87.7; S(18): 24.6; S(20): 87.7	P52594 2xPhospho [T177(87.7); S181(87.7)]	1	0.48	0.230889	-0.43	0.570254	0.91	0.181537
YVASYLLAALGGNSSPSAK	P05387	RPLP2	60S acidic ribosomal protein P2	P05387 [3-21]	Y(1): 0.0; S(4): 0.0; Y(5): 0.0; S(14): 8.1; S(15): 83.9; S(17): 8.1		25	0.48	0.0713716	-0.02	0.954222	0.5	0.181537
AIEPQKEEADENYNSVNTR	Q12846	STX4	Syntaxin-4	Q12846 [103-121]	Y(13): 0.1; S(15): 99.8; T(18): 0.1	Q12846 1xPhospho [S117(100)]	2	0.42	0.100578	0.78	0.0207131	-0.37	0.181537
KGSSSSVCSVASSSDISLGSTK	Q9ULT8	HECTD1	E3 ubiquitin-protein ligase HECTD1	Q9ULT8 [1382-1403]	S(3): 4.1; S(4): 31.8; S(5): 31.8; S(6): 31.8; S(9): 0.6; S(12): 0.0; S(13): 0.0; S(14): 0.0; S(17): 0.0; S(20): 0.0; T(21): 0.0		4	1	0.016191	0.35	0.558156	0.64	0.181622
DTIIDVVGAPLTPNSRK	Q9NPF5	DMAP1	DNA methyltransferase 1-associated protein 1	Q9NPF5 [434-450]	T(2): 0.1; T(12): 85.3; S(15): 14.6	Q9NPF5 1xPhospho [T445(85.3)]	1	0.01	0.985013	0.44	0.147434	-0.45	0.181622
EEPVSSGPEEAVGKSSSK	O00567	NOP56	Nucleolar protein 56	O00567 [565-582]	S(5): 0.0; S(6): 0.0; S(15): 33.3; S(16): 33.3; S(17): 33.3		1	1.22	0.000956824	0.84	0.0390426	0.38	0.181708
MGLAMGGGGGASFDR	P52272	HNRNPM	Heterogeneous nuclear ribonucleoprotein M	P52272 [607-621]	S(12): 100.0	P52272 1xPhospho [S618(100)]	4	0.48	0.210721	-0.41	0.602197	0.89	0.181824
SESQESLVTSPSKPK	Q76L83	ASXL2	Putative Polycomb group protein ASXL2	Q76L83 [515-529]	S(1): 0.0; S(3): 0.0; S(6): 0.0; T(9): 0.4; S(10): 93.4; S(12): 6.2	Q76L83 1xPhospho [S524(93.4)]	1	0.17	0.634375	0.73	0.0806982	-0.54	0.181824
NSFSSYAQLPKPTSTYSLSSFFR	Q9H9C1	VIPAS39	Spermatogenesis-defective protein 39 homolog	Q9H9C1 [92-114]	S(2): 0.0; S(4): 0.0; S(5): 0.0; Y(6): 0.0; T(13): 3.9; S(14): 30.7; T(15): 30.7; Y(16): 30.7; S(17): 3.9; S(19): 0.1; S(20): 0.1		3	-0.1	0.637217	0.28	0.253188	-0.38	0.182376
RSVQEGENPDDGVRGSPPEDYR	P42696	RBM34	RNA-binding protein 34	P42696 [13-34]	S(2): 0.0; S(16): 99.8; Y(21): 0.2	P42696 1xPhospho [S28(99.8)]	1	-0.14	0.700361	0.48	0.229442	-0.62	0.182726
QGDETPSTNNGSDDEKTGLK	Q9Y3P9	RABGAP1	Rab GTPase-activating protein 1	Q9Y3P9 [31-50]	T(5): 0.0; S(7): 1.6; T(8): 11.4; S(12): 87.0; T(17): 0.0	Q9Y3P9 1xPhospho [S42(87)]	1	-0.21	0.382969	0.23	0.403586	-0.44	0.182753
ASPTSTEEEQVMLR	Q96PE3	INPP4A	Type I inositol 3,4-bisphosphate 4-phosphatase	Q96PE3 [486-499]	S(2): 49.8; T(4): 49.8; S(5): 0.3; T(6): 0.0		1	0.03	0.908382	0.43	0.125465	-0.4	0.183299
ACRPPGSPGRAPPPTPAPSGCDPR	O95685	PPP1R3D	Protein phosphatase 1 regulatory subunit 3D	O95685 [40-63]	S(7): 100.0; T(15): 0.0; S(19): 0.0	O95685 1xPhospho [S46(100)]	1	1.06	0.00110386	0.71	0.0454506	0.34	0.183687
AQQQEEQGSVNDVKEEEKEEK	Q9Y4W2	LAS1L	Ribosomal biogenesis protein LAS1L	Q9Y4W2 [552-572]	S(9): 100.0	Q9Y4W2 1xPhospho [S560(100)]	1	-0.03	0.93083	0.42	0.163185	-0.45	0.183802
MDSFDEDLARPSGLLAQER	Q9Y2W1	THRAP3	Thyroid hormone receptor-associated protein 3	Q9Y2W1 [573-591]	S(3): 100.0; S(12): 0.0	Q9Y2W1 1xPhospho [S575(100)]	1	0.49	0.0450943	0.03	0.911523	0.46	0.18472
SSPQSTDTAMDLLK	Q9UGU5	HMGXB4	HMG domain-containing protein 4	Q9UGU5 [101-114]	S(1): 0.0; S(2): 0.0; S(5): 0.0; T(6): 99.6; T(8): 0.3	Q9UGU5 1xPhospho [T106(99.6)]	1	-0.18	0.460479	0.27	0.348513	-0.45	0.18472
TSDIFGSPVTATSR	Q9H910	HN1L	Hematological and neurological expressed 1-like protein	Q9H910 [91-104]	T(1): 0.0; S(2): 0.0; S(7): 100.0; T(10): 0.0; T(12): 0.0; S(13): 0.0	Q9H910 1xPhospho [S97(99.9)]	3	1.38	0.00118602	0.97	0.0488906	0.42	0.184799
SSAFSPLGGCTPAECFCQTDIGGDR	Q9UKA4	AKAP11	A-kinase anchor protein 11	Q9UKA4 [452-476]	S(1): 0.0; S(2): 0.0; S(5): 100.0; T(11): 0.0; T(19): 0.0	Q9UKA4 1xPhospho [S456(100)]	4	-0.14	0.613606	0.37	0.26637	-0.5	0.184799
SGSPSDNSGAEEMEVSLAK	P31749	AKT1	RAC-alpha serine/threonine-protein kinase	P31749 [122-140]	S(1): 1.2; S(3): 9.5; S(5): 9.5; S(8): 79.7; S(16): 0.0	P31749 1xPhospho [S129(79.7)]	3	-0.27	0.155658	0.1	0.712737	-0.37	0.185543
NIYAFMGTPVQK	P46013	MKI67	Antigen KI-67	P46013 [1550-1561]	Y(3): 0.0; T(8): 100.0	P46013 1xPhospho [T1557(100)]	2	1.12	0.0550282	0.09	0.966726	1.04	0.185575
DPAQPMSPGEATQSGARPADR	Q9BQG0	MYBBP1A	Myb-binding protein 1A	Q9BQG0 [5-25]	S(7): 90.1; T(12): 9.8; S(14): 0.1	Q9BQG0 1xPhospho [S11(90.1)]	2	0.35	0.119512	-0.09	0.804091	0.43	0.185575
SASVPDELGACGHSR	Q5T8I3	FAM102B	Protein FAM102B	Q5T8I3 [191-205]	S(1): 8.0; S(3): 92.1; S(14): 0.0	Q5T8I3 1xPhospho [S193(92)]	2	-0.03	0.803069	0.43	0.198022	-0.46	0.185575
TSSLTQFPPSQSEER	Q9H6Z4	RANBP3	Ran-binding protein 3	Q9H6Z4 [124-138]	T(1): 0.1; S(2): 9.3; S(3): 89.5; T(5): 1.1; S(10): 0.0; S(12): 0.0	Q9H6Z4 1xPhospho [S126(82.7)]	18	-0.09	0.770576	0.4	0.209224	-0.49	0.185575
STGVSFWTQDSDENEQEQQSDTEEGSNK	O14974	PPP1R12A	Protein phosphatase 1 regulatory subunit 12A	O14974 [852-879]	S(1): 0.0; T(2): 0.0; S(5): 0.0; T(8): 0.0; S(11): 0.0; S(20): 91.5; T(22): 8.5; S(26): 0.0	O14974 1xPhospho [S871(99.9)]	4	-0.52	0.0586527	0.01	0.984964	-0.53	0.185575
TVIRGSQAELK	Q9P0P0	RNF181	E3 ubiquitin-protein ligase RNF181	Q9P0P0 [65-75]	T(1): 0.0; S(6): 100.0	Q9P0P0 1xPhospho [S70(100)]	1	0.4	0.428168	1.12	0.0564273	-0.72	0.185961
TSPVTASDPAGPSYAAATLQASSAASSASPVSR	P18887	XRCC1	DNA repair protein XRCC1	P18887 [198-230]	T(1): 46.9; S(2): 46.9; T(5): 6.2; S(7): 0.0; S(13): 0.0; Y(14): 0.0; T(18): 0.0; S(22): 0.0; S(23): 0.0; S(26): 0.0; S(27): 0.2; S(29): 88.2; S(32): 11.6	P18887 2xPhospho [S226(88.2); T/S/Y]	2	0.27	0.246192	0.65	0.0362307	-0.38	0.186066
SGMNSPLR	Q9UQR1	ZNF148	Zinc finger protein 148	Q9UQR1 [661-668]	S(1): 0.0; S(5): 100.0	Q9UQR1 1xPhospho [S665(100)]	1	-0.52	0.0249051	-0.12	0.705879	-0.4	0.186736
NKPLEQSVEDLSK	O95466	FMNL1	Formin-like protein 1	O95466 [178-190]	S(7): 100.0; S(12): 0.0	O95466 1xPhospho [S184(100)]	3	-0.7	0.0772995	0.02	0.941414	-0.73	0.18677
VSDQNSPVLPK	Q9UPU5	USP24	Ubiquitin carboxyl-terminal hydrolase 24	Q9UPU5 [2042-2052]	S(2): 50.0; S(6): 50.0		3	-0.6	0.0669542	0	0.983339	-0.6	0.187131
GDKEEQEVSWTQYTQR	P98171	ARHGAP4	Rho GTPase-activating protein 4	P98171 [471-486]	S(9): 49.2; T(11): 49.2; Y(13): 1.4; T(14): 0.3		1	0.66	0.0135837	0.26	0.483387	0.4	0.187335
DASVAEAWLLGQEPYLSSR	Q01082	SPTBN1	Spectrin beta chain, non-erythrocytic 1	Q01082 [2025-2043]	S(3): 0.0; Y(15): 0.0; S(17): 94.8; S(18): 5.2	Q01082 1xPhospho [S2041(94.8)]	1	-1.35	0.000743581	-0.71	0.0281334	-0.64	0.187387
KPGGSGLLASPAAAPSPSSSSVSSSSATAPSSVVAATSGGGR	Q99700	ATXN2	Ataxin-2	Q99700 [198-239]	S(5): 0.0; S(10): 1.2; S(16): 1.2; S(18): 3.0; S(19): 2.6; S(20): 31.0; S(21): 31.0; S(23): 27.8; S(24): 17.0; S(25): 17.0; S(26): 54.3; T(28): 13.6; S(31): 0.3; S(32): 0.3; T(37): 0.0; S(38): 0.0		1	0.42	0.197053	-0.29	0.63655	0.71	0.187679
EEPLSEEEPCTSTAIASPEKK	Q9Y2X3	NOP58	Nucleolar protein 58	Q9Y2X3 [498-518]	S(5): 100.0; T(11): 0.0; S(12): 0.0; T(13): 0.1; S(17): 100.0	Q9Y2X3 2xPhospho [S502(100); S514(100)]	1	-0.09	0.664895	0.27	0.249693	-0.35	0.187679
SDSIRPALNSPVERPSSDQEEGETSAQTER	Q9UKV5	AMFR	E3 ubiquitin-protein ligase AMFR	Q9UKV5 [507-536]	S(1): 2.4; S(3): 13.8; S(10): 83.9; S(16): 85.9; S(17): 14.1; T(24): 0.0; S(25): 0.0; T(28): 0.0	Q9UKV5 2xPhospho [S516(83.9); S522(85.9)]	1	1.08	0.0155069	0.44	0.528981	0.64	0.187707
VDSPGRTEPCTAALDLGVQLTPETLVEAK	O15417	TNRC18	Trinucleotide repeat-containing gene 18 protein	O15417 [1230-1258]	S(3): 70.9; T(7): 14.6; T(11): 14.6; T(21): 0.0; T(24): 0.0		3	-0.41	0.102531	0.06	0.862022	-0.46	0.187773
CSSVADSGDTAIGTSCSDIAEDFCSSSGSPPFQPIK	Q6P2H3	CEP85	Centrosomal protein of 85 kDa	Q6P2H3 [49-84]	S(2): 0.0; S(3): 0.0; S(7): 0.0; T(10): 0.0; T(14): 0.0; S(15): 0.0; S(17): 0.0; S(25): 2.6; S(26): 0.5; S(27): 2.6; S(29): 94.3	Q6P2H3 1xPhospho [S77(94.3)]	1	-0.52	0.170132	0.22	0.690879	-0.73	0.187773
GAGDGSDEEVDGKADGAEAKPAE	P35579	MYH9	Myosin-9	P35579 [1938-1960]	S(6): 100.0	P35579 1xPhospho [S1943(100)]	2	0.11	0.728464	0.55	0.0968092	-0.45	0.187913
RYSGNMEYVISR	O95835	LATS1	Serine/threonine-protein kinase LATS1	O95835 [276-287]	Y(2): 50.0; S(3): 50.0; Y(8): 0.0; S(11): 0.0		1	1.54	0.00040731	1.2	0.0136609	0.34	0.188355
HFPLDLRTSMDGK	Q01433	AMPD2	AMP deaminase 2	Q01433 [110-122]	T(8): 50.0; S(9): 50.0		2	0.11	0.726347	-0.66	0.227177	0.76	0.189076
EAPATQASSTTQLTDTQVLAAENK	Q9UNF1	MAGED2	Melanoma-associated antigen D2	Q9UNF1 [77-100]	T(5): 6.1; S(8): 6.1; S(9): 40.8; T(10): 40.8; T(11): 6.1; T(14): 0.0; T(16): 0.0		2	0.53	0.0343949	0.08	0.812179	0.45	0.189342
KSSLDSNSSEMAIMMGADAK	Q5VZ89	DENND4C	DENN domain-containing protein 4C	Q5VZ89 [823-842]	S(2): 94.4; S(3): 75.4; S(6): 14.1; S(8): 13.9; S(9): 2.3	Q5VZ89 2xPhospho [S824(94.4); S825(75.4)]	5	0.19	0.620349	-0.72	0.270686	0.9	0.189342
DNTFFRESPVGR	Q8NEY8	PPHLN1	Periphilin-1	Q8NEY8 [126-137]	T(3): 0.0; S(8): 100.0	Q8NEY8 1xPhospho [S133(100)]	6	-0.62	0.00985751	-0.2	0.377929	-0.41	0.189342
TDGSISGDRQPVTVADYISR	P51116	FXR2	Fragile X mental retardation syndrome-related protein 2	P51116 [598-617]	T(1): 0.0; S(4): 1.4; S(6): 48.6; T(13): 48.6; Y(17): 1.4; S(19): 0.1		2	0	0.971441	0.39	0.156068	-0.4	0.189482
CVSMPGDISGLQGGPR	Q8IY17	PNPLA6	Neuropathy target esterase	Q8IY17 [409-424]	S(3): 100.0; S(9): 0.0	Q8IY17 1xPhospho [S411(100)]	1	-0.21	0.534323	0.35	0.314085	-0.56	0.18959
SSDQPLTVPVSPK	Q9ULW0	TPX2	Targeting protein for Xklp2	Q9ULW0 [728-740]	S(1): 0.0; S(2): 0.0; T(7): 0.0; S(11): 100.0	Q9ULW0 1xPhospho [S738(100)]	5	0.42	0.0262181	0.11	0.716319	0.3	0.189718
RYEDDGISDDEIEGKR	Q9Y2K7	KDM2A	Lysine-specific demethylase 2A	Q9Y2K7 [21-36]	Y(2): 1.0; S(8): 99.0	Q9Y2K7 1xPhospho [S28(99.9)]	2	0.1	0.692786	0.49	0.0926049	-0.4	0.190008
EESPMDVDQPSPSAQDTQSIASDGTPQGEK	Q7Z6Z7	HUWE1	E3 ubiquitin-protein ligase HUWE1	Q7Z6Z7 [3806-3835]	S(3): 0.0; S(11): 44.7; S(13): 44.7; T(17): 8.8; S(19): 1.8; S(22): 0.0; T(25): 0.0		1	-0.87	0.00796489	-0.29	0.318057	-0.58	0.190152
VAVVTGSTSGIGFAIAR	Q13268	DHRS2	Dehydrogenase/reductase SDR family member 2, mitochondrial	Q13268 [38-54]	T(5): 0.0; S(7): 0.0; T(8): 0.6; S(9): 99.4		3	-0.95	0.00454419	-0.4	0.190914	-0.54	0.190199
TYSAPAINAIQGGSFESPKK	Q9H4L5	OSBPL3	Oxysterol-binding protein-related protein 3	Q9H4L5 [249-268]	T(1): 5.5; Y(2): 5.5; S(3): 89.1; S(14): 0.0; S(17): 0.0	Q9H4L5 1xPhospho [S251(89.1)]	5	-1.42	0.000286316	-0.84	0.0085569	-0.57	0.190199
YSISLSPPEQQK	Q15057	ACAP2	Arf-GAP with coiled-coil, ANK repeat and PH domain-containing protein 2	Q15057 [516-527]	Y(1): 0.0; S(2): 0.0; S(4): 6.5; S(6): 93.5	Q15057 1xPhospho [S521(93.5)]	1	-1.68	0.00516325	-0.55	0.214192	-1.12	0.190401
KDSEEEVSLLGSQDIEEGNHQVEDGCR	Q9Y487	ATP6V0A2	V-type proton ATPase 116 kDa subunit a isoform 2	Q9Y487 [693-719]	S(3): 100.0; S(8): 0.0; S(12): 0.0	Q9Y487 1xPhospho [S695(100)]	1	-0.54	0.0172226	-0.14	0.560004	-0.4	0.190554
IIEQLSPQAATSR	Q03468	ERCC6	DNA excision repair protein ERCC-6	Q03468 [153-165]	S(6): 98.3; T(11): 0.2; S(12): 1.5	Q03468 1xPhospho [S158(98.3)]	1	0.57	0.0105747	0.22	0.39653	0.35	0.190685
KSPIINESR	Q13523	PRPF4B	Serine/threonine-protein kinase PRP4 homolog	Q13523 [276-284]	S(2): 100.0; S(8): 0.0	Q13523 1xPhospho [S277(100)]	1	0.31	0.328593	0.78	0.0463913	-0.47	0.190771
DKPTYDEIFYTLSPVNGK	Q9H4M9	EHD1	EH domain-containing protein 1	Q9H4M9 [444-461]	T(4): 0.0; Y(5): 0.0; Y(10): 0.0; T(11): 1.2; S(13): 98.8	Q9H4M9 1xPhospho [S456(98.8)]	2	1.17	0.00264167	0.74	0.116908	0.43	0.19078
DSPAFPDSPWRER	Q9NQS7	INCENP	Inner centromere protein	Q9NQS7 [268-280]	S(2): 0.0; S(8): 100.0	Q9NQS7 1xPhospho [S275(100)]	1	0.39	0.0952234	-0.06	0.891589	0.46	0.19078
FTASAGIQVVGDDLTVTNPK	P06733	ENO1	Alpha-enolase	P06733 [307-326]	T(2): 11.3; S(4): 88.7; T(15): 0.0; T(17): 0.0	P06733 1xPhospho [S310(88.7)]	2	-0.56	0.0244015	-0.12	0.686335	-0.44	0.19078
RDFTNEAPPAPLPDASASPLSPHRR	Q6WCQ1	MPRIP	Myosin phosphatase Rho-interacting protein	Q6WCQ1 [345-369]	T(4): 0.0; S(16): 0.2; S(18): 0.2; S(21): 99.7	Q6WCQ1 1xPhospho [S365(99.7)]	1	0.46	0.0548272	0.77	0.0148695	-0.32	0.191233
KPSEEEYVIR	Q15052	ARHGEF6	Rho guanine nucleotide exchange factor 6	Q15052 [638-647]	S(3): 50.0; Y(7): 50.0		2	0.89	0.0588037	0.06	0.973853	0.83	0.191524
AGPNASIISLK	Q9H0A0	NAT10	N-acetyltransferase 10	Q9H0A0 [979-989]	S(6): 99.8; S(9): 0.2	Q9H0A0 1xPhospho [S984(99.8)]	1	0.81	0.0118813	0.36	0.428674	0.45	0.191607
GIAIAYEDEGSG	Q9BQC3	DPH2	Diphthamide biosynthesis protein 2	Q9BQC3 [478-489]	Y(6): 0.0; S(11): 100.0	Q9BQC3 1xPhospho [S488(100)]	2	-0.52	0.0297086	-0.11	0.754997	-0.41	0.191797
LNDPFQPFPGNDSPKEKDPEIFCDPFTSATTTTNK	P42566	EPS15	Epidermal growth factor receptor substrate 15	P42566 [802-836]	S(13): 86.9; T(27): 5.5; S(28): 5.5; T(30): 1.5; T(31): 0.4; T(32): 0.0; T(33): 0.0	P42566 1xPhospho [S814(94.1)]	3	-0.37	0.100468	0.06	0.877183	-0.41	0.192319
EAEEEELEIPPQYQAGGSGIHRPVAK	Q5JTH9	RRP12	RRP12-like protein	Q5JTH9 [1200-1225]	Y(13): 50.0; S(18): 50.0		1	0.02	0.908286	0.38	0.131113	-0.35	0.192552
ETAVPGPLGIEDISPNLSPDDKSFSR	Q12888	TP53BP1	Tumor suppressor p53-binding protein 1	Q12888 [1413-1438]	T(2): 0.0; S(14): 100.0; S(18): 100.0; S(23): 0.0; S(25): 0.0	Q12888 2xPhospho [S1426(100); S1430(99.6)]	2	0.57	0.0300528	0.14	0.756863	0.43	0.192643
YPSLGQKPGGSDFLMK	O43768	ENSA	Alpha-endosulfine	O43768 [41-56]	Y(1): 1.6; S(3): 98.4; S(11): 0.0	O43768 1xPhospho [S43(98.4)]	1	0.13	0.734878	-0.68	0.228949	0.81	0.192643
RDHANYEEDENGDITPIK	Q99547	MPHOSPH6	M-phase phosphoprotein 6	Q99547 [133-150]	Y(6): 0.0; T(15): 100.0	Q99547 1xPhospho [T147(100)]	1	0.93	0.00228146	0.6	0.0989256	0.33	0.192724
RFIQELSGSSPK	Q01664	TFAP4	Transcription factor AP-4	Q01664 [115-126]	S(7): 5.4; S(9): 5.4; S(10): 89.2		3	-0.51	0.0393702	-0.07	0.850522	-0.44	0.192724
EATAQKPTGSVGSTVTTPPPLVR	Q86YP4	GATAD2A	Transcriptional repressor p66-alpha	Q86YP4 [173-195]	T(3): 0.0; T(8): 0.0; S(10): 0.0; S(13): 0.0; T(14): 0.0; T(16): 1.1; T(17): 98.9	Q86YP4 1xPhospho [T189(88)]	3	0.75	0.00267411	0.44	0.117206	0.31	0.192771
QLVTSPSPMSSSDGK	Q2KHR2	RFX7	DNA-binding protein RFX7	Q2KHR2 [278-292]	T(4): 91.5; S(5): 8.4; S(7): 0.1; S(10): 0.0; S(11): 0.0; S(12): 0.0	Q2KHR2 1xPhospho [T281(91.5)]	2	0.09	0.720079	0.51	0.0979265	-0.43	0.192771
EQDNSESPNGRTSPLVSQNNEQGSTLR	Q15652	JMJD1C	Probable JmjC domain-containing histone demethylation protein 2C	Q15652 [2041-2067]	S(5): 0.0; S(7): 0.0; T(12): 0.2; S(13): 99.8; S(17): 0.0; S(24): 0.0; T(25): 0.0	Q15652 1xPhospho [S2053(99.8)]	2	-0.2	0.465634	0.27	0.36078	-0.47	0.192771
NEMGIPQQTTSPENAGPQNTK	Q15398	DLGAP5	Disks large-associated protein 5	Q15398 [652-672]	T(9): 0.0; T(10): 0.0; S(11): 100.0; T(20): 0.0		2	-0.08	0.807265	0.43	0.205807	-0.5	0.192882
NPRESTGNMVTGQTVCK	Q15021	NCAPD2	Condensin complex subunit 1	Q15021 [581-597]	S(5): 89.6; T(6): 10.3; T(11): 0.0; T(14): 0.0	Q15021 1xPhospho [S585(89.6)]	1	1.22	0.00303489	0.75	0.131249	0.47	0.192888
LKPGGVGAPSSSSPSPSPSAR	Q92797	SYMPK	Symplekin	Q92797 [1159-1179]	S(10): 0.0; S(11): 0.0; S(12): 0.1; S(13): 1.0; S(15): 98.0; S(17): 91.2; S(19): 9.6	Q92797 2xPhospho [S1173(98); S1175(91.2)]	1	0.35	0.123205	0.68	0.0244839	-0.33	0.193117
NRVPSAGDVEK	Q15785	TOMM34	Mitochondrial import receptor subunit TOM34	Q15785 [182-192]	S(5): 100.0	Q15785 1xPhospho [S186(100)]	2	0.92	0.043434	1.45	0.0127958	-0.53	0.193117
SSGEIVYCGQVFEKSPLR	Q02543	RPL18A	60S ribosomal protein L18a	Q02543 [57-74]	S(1): 0.0; S(2): 0.0; Y(7): 0.0; S(15): 100.0	Q02543 1xPhospho [S71(100)]	2	-0.43	0.049496	-0.04	0.919598	-0.39	0.193117
SVELDLNQAHMEETPK	Q14680	MELK	Maternal embryonic leucine zipper kinase	Q14680 [505-520]	S(1): 100.0; T(14): 0.0	Q14680 1xPhospho [S505(100)]	1	-0.06	0.803724	0.32	0.207516	-0.36	0.193125
MDRDPLGGLADMFGQMPGSGIGTGPGVIQDRFSPTMGR	P78344	EIF4G2	Eukaryotic translation initiation factor 4 gamma 2	P78344 [363-400]	S(19): 0.2; T(23): 16.5; S(33): 79.8; T(35): 3.6	P78344 1xPhospho [S395(79.8)]	3	-0.63	0.00891693	-1.18	0.00592244	0.56	0.193125
APSQLPLSGSR	Q9BW19	KIFC1	Kinesin-like protein KIFC1	Q9BW19 [24-34]	S(3): 97.2; S(8): 0.5; S(10): 2.3	Q9BW19 1xPhospho [S26(97.2)]	1	1.19	0.0757324	-0.08	0.963092	1.27	0.193237
EMPQDLRSPAR	O43765	SGTA	Small glutamine-rich tetratricopeptide repeat-containing protein alpha	O43765 [70-80]	S(8): 100.0	O43765 1xPhospho [S77(100)]	1	0.37	0.121788	0.71	0.0244839	-0.34	0.193283
VLSTSTDLEAAVADALKKPVR	Q7Z460	CLASP1	CLIP-associating protein 1	Q7Z460 [793-813]	S(3): 32.5; T(4): 32.5; S(5): 32.5; T(6): 2.5	Q7Z460 1xPhospho [S797(89.2)]	3	0.02	0.920392	-0.41	0.173508	0.43	0.193283
RGESLDNLDSPR	Q8WWI1	LMO7	LIM domain only protein 7	Q8WWI1 [1507-1518]	S(4): 100.0; S(10): 0.0	Q8WWI1 1xPhospho [S1510(100)]	2	-0.03	0.964831	0.4	0.163185	-0.43	0.193684
NRPTSISWDGLDSGK	P30086	PEBP1	Phosphatidylethanolamine-binding protein 1	P30086 [48-62]	T(4): 0.4; S(5): 99.6; S(7): 0.0; S(13): 0.0	P30086 1xPhospho [S52(99.6)]	2	0.57	0.0825541	1.03	0.0193247	-0.46	0.193951
GPEEEEIGSPEPMAAPASASQK	Q14807	KIF22	Kinesin-like protein KIF22	Q14807 [404-425]	S(9): 100.0; S(18): 0.0; S(20): 0.0	Q14807 1xPhospho [S412(100)]	1	0.24	0.411677	-0.45	0.403514	0.69	0.193951
TRKSPSSDSWTCADTSTER	Q8N6T3	ARFGAP1	ADP-ribosylation factor GTPase-activating protein 1	Q8N6T3 [340-358]	T(1): 0.0; S(4): 10.3; S(6): 79.3; S(7): 10.3; S(9): 0.0; T(11): 0.0; T(15): 0.0; S(16): 0.0; T(17): 0.0	Q8N6T3 1xPhospho [S343(98)]	3	-0.36	0.335595	0.31	0.47045	-0.66	0.193951
MGLSMER	P52272	HNRNPM	Heterogeneous nuclear ribonucleoprotein M	P52272 [525-531]	S(4): 100.0	P52272 1xPhospho [S528(100)]	2	0.28	0.494711	-0.79	0.346486	1.08	0.194892
QEEIDESDDDLDDKPSPIK	Q9ULH1	ASAP1	Arf-GAP with SH3 domain, ANK repeat and PH domain-containing protein 1	Q9ULH1 [711-729]	S(7): 100.0; S(16): 0.0	Q9ULH1 1xPhospho [S717(100)]	2	-0.52	0.0289792	-0.11	0.738252	-0.41	0.195011
NMPGLSAATLASLGGTSSR	Q32MZ4	LRRFIP1	Leucine-rich repeat flightless-interacting protein 1	Q32MZ4 [99-117]	S(6): 0.0; T(9): 0.0; S(12): 0.0; T(16): 0.7; S(17): 7.6; S(18): 91.8	Q32MZ4 1xPhospho [S116(91.8)]	4	-0.81	0.0353334	-0.1	0.80592	-0.72	0.195011
LAGGQTSQPTTPLTSPQR	O95155	UBE4B	Ubiquitin conjugation factor E4 B	O95155 [17-34]	T(6): 0.0; S(7): 0.0; T(10): 0.0; T(11): 0.0; T(14): 10.6; S(15): 89.4	O95155 1xPhospho [S31(89.4)]	1	0.78	0.0076803	0.36	0.295639	0.43	0.196071
MQAGQISVQSSEPSSPEPGK	P37275	ZEB1	Zinc finger E-box-binding homeobox 1	P37275 [632-651]	S(7): 0.0; S(10): 0.0; S(11): 0.1; S(14): 50.0; S(15): 50.0		2	-0.24	0.328604	0.21	0.482679	-0.46	0.196118
VFDLQFSTDSPR	Q15003	NCAPH	Condensin complex subunit 2	Q15003 [72-83]	S(7): 47.6; T(8): 4.7; S(10): 47.6		1	1.94	0.0345625	0.6	0.795174	1.34	0.196413
SGTPTQDEMMDKPTSSSVDTMSLLSK	Q5VT52	RPRD2	Regulation of nuclear pre-mRNA domain-containing protein 2	Q5VT52 [730-755]	S(1): 16.0; T(3): 16.0; T(5): 66.4; T(14): 1.2; S(15): 0.1; S(16): 0.1; S(17): 0.1; T(20): 0.0; S(22): 0.0; S(25): 0.0		8	-0.34	0.0754476	-0.01	0.968456	-0.32	0.196413
TIAATPIQTLPQSQSTPK	P14859	POU2F1	POU domain, class 2, transcription factor 1	P14859 [255-272]	T(1): 0.0; T(5): 0.0; T(9): 0.0; S(13): 0.0; S(15): 50.0; T(16): 50.0		2	1.02	0.0504873	0.09	0.919025	0.91	0.196551
SRSDIDVNAAAGAK	O75122	CLASP2	CLIP-associating protein 2	O75122 [368-381]	S(1): 0.2; S(3): 99.8	O75122 1xPhospho [S370(99.6)]	6	-0.05	0.843257	0.32	0.197521	-0.37	0.196551
KPSVPDSASPADDSFVDPGER	P16333	NCK1	Cytoplasmic protein NCK1	P16333 [83-103]	S(3): 0.0; S(7): 0.1; S(9): 99.7; S(14): 0.1	P16333 1xPhospho [S91(99.7)]	2	-0.12	0.528491	-0.54	0.0728867	0.41	0.196551
ESTQLSPADLTEGKPTDPSK	Q08J23	NSUN2	tRNA (cytosine(34)-C(5))-methyltransferase	Q08J23 [451-470]	S(2): 49.7; T(3): 49.7; S(6): 0.5; T(11): 0.0; T(16): 0.0; S(19): 0.0		5	-0.02	0.952622	0.35	0.167603	-0.37	0.196835
KSSPSVKPAVDPAAAK	Q6FI81	CIAPIN1	Anamorsin	Q6FI81 [181-196]	S(2): 49.7; S(3): 49.7; S(5): 0.5		3	0.23	0.151854	-0.09	0.750881	0.33	0.196842
GGQGDPAVPAQQPADPSTPER	O15231	ZNF185	Zinc finger protein 185	O15231 [430-450]	S(17): 91.7; T(18): 8.3	O15231 1xPhospho [S446(91.7)]	2	0.62	0.0271529	0.99	0.00991533	-0.36	0.197401
RSSLLNAK	Q8TEU7	RAPGEF6	Rap guanine nucleotide exchange factor 6	Q8TEU7 [1092-1099]	S(2): 4.2; S(3): 95.8	Q8TEU7 1xPhospho [S1094(95.8)]	1	0.38	0.0911625	0.73	0.0209424	-0.35	0.197413
RDSWSYINSK	P13612	ITGA4	Integrin alpha-4	P13612 [1019-1028]	S(3): 100.0; S(5): 0.0; Y(6): 0.0; S(9): 0.0	P13612 1xPhospho [S1021(100)]	5	-0.11	0.639985	0.29	0.275673	-0.4	0.198611
TDSLFVLPSRDDATPVRDEPMDAESITFK	Q7Z6E9	RBBP6	E3 ubiquitin-protein ligase RBBP6	Q7Z6E9 [971-999]	T(1): 0.0; S(3): 0.0; S(9): 0.1; T(14): 99.9; S(25): 0.0; T(27): 0.0	Q7Z6E9 1xPhospho [T984(99.9)]	1	-1.01	0.0141164	-0.26	0.472595	-0.75	0.198611
SLSKSDSDLLTCSPTEDATMGSR	Q92625	ANKS1A	Ankyrin repeat and SAM domain-containing protein 1A	Q92625 [622-644]	S(1): 0.0; S(3): 1.2; S(5): 88.6; S(7): 10.1; T(11): 0.0; S(13): 0.0; T(15): 0.0; T(19): 0.0; S(22): 0.0	Q92625 1xPhospho [S626(88.6)]	8	0.01	0.962577	0.52	0.148239	-0.51	0.199092
RADLNQGIGEPQSPSR	Q96C19	EFHD2	EF-hand domain-containing protein D2	Q96C19 [62-77]	S(13): 50.0; S(15): 50.0		4	1.14	0.000866702	0.82	0.0323084	0.32	0.199294
HFNDPGSPCFNR	Q9UBS8	RNF14	E3 ubiquitin-protein ligase RNF14	Q9UBS8 [445-456]	S(7): 100.0	Q9UBS8 1xPhospho [S451(100)]	1	0.65	0.00540651	0.31	0.21228	0.34	0.199294
VSESEGKLEGQATAVTPNK	Q9BXB4	OSBPL11	Oxysterol-binding protein-related protein 11	Q9BXB4 [12-30]	S(2): 0.0; S(4): 0.0; T(13): 0.2; T(16): 99.9	Q9BXB4 1xPhospho [T27(99.8)]	1	2.04	0.000264853	1.66	0.00761065	0.38	0.199355
SSLQVDWHEEEWEK	Q96PE3	INPP4A	Type I inositol 3,4-bisphosphate 4-phosphatase	Q96PE3 [516-529]	S(1): 50.0; S(2): 50.0		3	0.85	0.00389401	1.15	0.00393924	-0.3	0.199788
LGSYSGPTSVSR	Q9BZ23	PANK2	Pantothenate kinase 2, mitochondrial	Q9BZ23 [187-198]	S(3): 9.4; Y(4): 80.9; S(5): 9.4; T(8): 0.2; S(9): 0.0; S(11): 0.0	Q9BZ23 1xPhospho [Y190(80.9)]	1	0.34	0.164467	0.68	0.0296933	-0.35	0.199788
KQPPVSPGTALVGSQKEPSEVPTPK	P17096	HMGA1	High mobility group protein HMG-I/HMG-Y	P17096 [31-55]	S(6): 0.0; T(9): 0.0; S(14): 47.1; S(19): 47.1; T(23): 5.9		5	1.17	0.000694254	0.83	0.0249092	0.35	0.200351
YKDIIRQPSEEEIIK	Q15121	PEA15	Astrocytic phosphoprotein PEA-15	Q15121 [108-122]	Y(1): 0.0; S(9): 100.0	Q15121 1xPhospho [S116(100)]	1	-0.24	0.542522	-1.36	0.0752554	1.11	0.200351
MAPALSGANLTSPR	Q9UQ35	SRRM2	Serine/arginine repetitive matrix protein 2	Q9UQ35 [2371-2384]	S(6): 0.0; T(11): 0.1; S(12): 99.9	Q9UQ35 1xPhospho [S2382(99.9)]	2	0.57	0.0546837	0.06	0.935642	0.51	0.20039
WSDSSKQDDSPSGASYGQDYDLSPSR	Q9NYV4	CDK12	Cyclin-dependent kinase 12	Q9NYV4 [227-252]	S(2): 0.0; S(4): 0.0; S(5): 0.0; S(10): 100.0; S(12): 0.0; S(15): 0.0; Y(16): 0.0; Y(20): 0.0; S(23): 97.7; S(25): 2.3	Q9NYV4 2xPhospho [S236(100); S249(97.6)]	1	0.61	0.141115	1.13	0.027226	-0.52	0.200775
GLGPPSPPAPPR	Q13425	SNTB2	Beta-2-syntrophin	Q13425 [90-101]	S(6): 100.0	Q13425 1xPhospho [S95(100)]	3	-1.21	0.000154426	-0.86	0.00403346	-0.36	0.200844
TAQIINTQDLEKSHTK	Q02224	CENPE	Centromere-associated protein E	Q02224 [1262-1277]	T(1): 0.0; T(7): 0.0; S(13): 50.0; T(15): 50.0		1	0.03	0.94103	-0.73	0.17381	0.74	0.201371
DHTDQTSETAPDASVPPSVKPK	Q9C0C9	UBE2O	E2/E3 hybrid ubiquitin-protein ligase UBE2O	Q9C0C9 [1214-1235]	T(3): 0.5; T(6): 47.3; S(7): 47.3; T(9): 4.9; S(14): 0.0; S(18): 0.0		1	-0.21	0.319996	0.19	0.504004	-0.42	0.201394
VLGRSPLTILQDDNSPGTLTLR	Q99618	CDCA3	Cell division cycle-associated protein 3	Q99618 [195-216]	S(5): 87.5; T(8): 12.5; S(15): 0.0; T(18): 0.0; T(20): 0.0	Q99618 1xPhospho [S199(87.5)]	1	-0.25	0.241875	-0.79	0.0388878	0.54	0.201394
DTYSDRSGSSSPDSEITELK	P17812	CTPS1	CTP synthase 1	P17812 [565-584]	T(2): 0.1; Y(3): 0.7; S(4): 0.1; S(7): 99.2; S(9): 98.7; S(10): 0.7; S(11): 0.7; S(14): 0.0; T(17): 0.0	P17812 2xPhospho [S571(99.2); S573(98.7)]	2	-0.37	0.0754751	0.01	0.977754	-0.38	0.201394
AEEEDLAAVPFLASDNEEEEDEKGNSGSLIR	O95714	HERC2	E3 ubiquitin-protein ligase HERC2	O95714 [2915-2945]	S(14): 97.8; S(26): 1.1; S(28): 1.1	O95714 1xPhospho [S2928(97.8)]	2	-0.51	0.0585685	0	0.954222	-0.5	0.201394
LRVSCEAPGDGDPFQGLLSGVAQMK	Q9BXV9	C14orf142	Uncharacterized protein C14orf142	Q9BXV9 [17-41]	S(4): 100.0; S(19): 0.0	Q9BXV9 1xPhospho [S20(100)]	1	1.57	0.000314882	1.21	0.00919971	0.35	0.201436
DLVAQAPLKPKTPR	O94776	MTA2	Metastasis-associated protein MTA2	O94776 [523-536]	T(12): 100.0	O94776 1xPhospho [T534(100)]	1	1.6	0.0307112	0.51	0.744964	1.09	0.201874
AMDNHSDSEEELAAFCPQLDDSTVAR	Q86VR2	FAM134C	Protein FAM134C	Q86VR2 [253-278]	S(6): 100.0; S(8): 100.0; S(22): 0.0; T(23): 0.0	Q86VR2 2xPhospho [S258(100); S260(100)]	10	-0.02	0.964438	0.41	0.168508	-0.43	0.201874
FLSSVELEAAELPGSDDLSDEC	Q8N5W9	FAM101B	Protein FAM101B	Q8N5W9 [193-214]	S(3): 0.0; S(4): 0.0; S(15): 0.0; S(19): 100.0		14	-0.14	0.616417	0.29	0.290002	-0.43	0.201874
KQLGDFFGMSNSYAECYPATMDDMAVDSDEEVDYSK	Q13123	IK	Protein Red	Q13123 [433-468]	S(10): 0.0; S(12): 0.0; Y(13): 0.0; Y(17): 0.0; T(20): 0.0; S(28): 99.5; Y(34): 0.5; S(35): 0.1	Q13123 1xPhospho [S460(99.5)]	4	-0.07	0.735206	0.31	0.240616	-0.39	0.20194
ESPQEEEIDPFDVDSGREFGNPNRPVASTR	Q9UJK0	TSR3	Ribosome biogenesis protein TSR3 homolog	Q9UJK0 [227-256]	S(2): 0.0; S(15): 99.8; S(28): 0.1; T(29): 0.1	Q9UJK0 1xPhospho [S241(99.8)]	1	-0.21	0.306362	0.18	0.520124	-0.39	0.2025
RFPEAEALSPEQAAHYLR	Q2NKX8	ERCC6L	DNA excision repair protein ERCC-6-like	Q2NKX8 [6-23]	S(9): 100.0; Y(16): 0.0	Q2NKX8 1xPhospho [S14(100)]	2	-0.32	0.0673379	-0.73	0.0177639	0.41	0.2025
SASSNSAEAGGDTVTLDDILSLK	Q9UGU0	TCF20	Transcription factor 20	Q9UGU0 [1367-1389]	S(1): 1.6; S(3): 10.8; S(4): 10.8; S(6): 75.2; T(13): 1.6; T(15): 0.0; S(21): 0.0	Q9UGU0 1xPhospho [S1372(75.2)]	3	0.77	0.00758121	0.4	0.28341	0.38	0.202608
LPLVPESPRR	Q86WB0	ZC3HC1	Nuclear-interacting partner of ALK	Q86WB0 [315-324]	S(7): 100.0	Q86WB0 1xPhospho [S321(100)]	3	0.41	0.0675909	0.01	0.989993	0.4	0.203456
VVGSMPTAGSAGSVPENLNLFPEPGSK	Q8WU79	SMAP2	Stromal membrane-associated protein 2	Q8WU79 [228-254]	S(4): 0.0; T(7): 0.0; S(10): 0.1; S(13): 99.9; S(26): 0.0	Q8WU79 1xPhospho [S240(95)]	4	-0.55	0.0654357	0.01	0.981694	-0.55	0.203456
LSPQDPRPLSPGALQLAGEK	Q8TEK3	DOT1L	Histone-lysine N-methyltransferase, H3 lysine-79 specific	Q8TEK3 [825-844]	S(2): 100.0; S(10): 100.0	Q8TEK3 2xPhospho [S826(100); S834(100)]	1	-0.62	0.0423439	-0.09	0.850801	-0.54	0.203456
SFLHEQEENVVK	Q13576	IQGAP2	Ras GTPase-activating-like protein IQGAP2	Q13576 [685-696]	S(1): 100.0	Q13576 1xPhospho [S685(100)]	1	0.87	0.00696656	1.19	0.00528162	-0.32	0.203481
NLIDSMDQSAFAGFSFVNPK	Q05655	PRKCD	Protein kinase C delta type	Q05655 [650-669]	S(5): 0.0; S(9): 0.0; S(15): 100.0	Q05655 1xPhospho [S664(100)]	3	-0.75	0.0579704	0.05	0.945355	-0.81	0.203505
HIKEEPLSEEEPCTSTAIASPEK	Q9Y2X3	NOP58	Nucleolar protein 58	Q9Y2X3 [495-517]	S(8): 99.9; T(14): 0.0; S(15): 0.0; T(16): 0.1; S(20): 100.0	Q9Y2X3 2xPhospho [S502(99.8); S514(100)]	4	-0.72	0.00574299	-0.3	0.219341	-0.41	0.203518
VSSSSGTTPFSSAAALPPGSYASLGR	Q7Z460	CLASP1	CLIP-associating protein 1	Q7Z460 [614-639]	S(2): 0.0; S(3): 0.0; S(4): 0.0; S(5): 0.0; T(7): 0.0; T(8): 0.0; S(11): 0.0; S(12): 0.0; S(20): 10.3; Y(21): 79.4; S(23): 10.3	Q7Z460 1xPhospho [Y634(79.4)]	6	-0.11	0.704691	0.37	0.254049	-0.49	0.20353
RPESPSEISPIK	Q7Z5K2	WAPAL	Wings apart-like protein homolog	Q7Z5K2 [218-229]	S(4): 100.0; S(6): 0.0; S(9): 0.0	Q7Z5K2 1xPhospho [S226(100)]	5	-0.74	0.00248287	-0.37	0.102641	-0.37	0.203563
RKELSQNTDESGLNDEAIAK	P35251	RFC1	Replication factor C subunit 1	P35251 [186-205]	S(5): 89.2; T(8): 10.8; S(11): 0.0	P35251 1xPhospho [S190(89.2)]	2	1.81	0.000149766	1.5	0.00393924	0.31	0.203645
GGPLQALTRESTR	P42167	TMPO	Lamina-associated polypeptide 2, isoforms beta/gamma	P42167 [240-252]	T(8): 0.6; S(11): 92.1; T(12): 7.3	P42167 1xPhospho [S250(92.1)]	2	0.6	0.0380178	0.09	0.812179	0.52	0.203645
KPDSWDGNREPGPGHEHFR	Q9C0J8	WDR33	pre-mRNA 3' end processing protein WDR33	Q9C0J8 [1178-1196]	S(4): 100.0	Q9C0J8 1xPhospho [S1181(100)]	1	0.34	0.145787	-0.12	0.779026	0.46	0.203645
KASSPSPLTIGTPESQR	Q9NPI6	DCP1A	mRNA-decapping enzyme 1A	Q9NPI6 [520-536]	S(3): 0.7; S(4): 98.6; S(6): 0.7; T(9): 0.1; T(12): 99.9; S(15): 0.0	Q9NPI6 2xPhospho [S525(98.2); S/T]	4	0.33	0.0969208	-0.02	0.913207	0.35	0.203645
SRSPGSPVGEGTGSPPK	P35611	ADD1	Alpha-adducin	P35611 [353-369]	S(1): 1.1; S(3): 97.8; S(6): 1.1; T(12): 0.0; S(14): 0.0	P35611 1xPhospho [S355(97.8)]	2	-0.17	0.567535	0.36	0.31802	-0.55	0.203645
WCNVQSTQDEFEELTMSQK	P27707	DCK	Deoxycytidine kinase	P27707 [58-76]	S(6): 0.0; T(7): 0.0; T(15): 0.3; S(17): 99.7	P27707 1xPhospho [S74(99.7)]	15	-0.23	0.310265	0.19	0.518704	-0.42	0.203645
MLPHAPGVQMQAIPEDAVHEDSGDEDGEDPDKR	Q92769	HDAC2	Histone deacetylase 2	Q92769 [373-405]	S(22): 100.0	Q92769 1xPhospho [S394(100)]	14	-0.37	0.0578509	-0.03	0.943822	-0.35	0.203645
TSSTCSNESLSVGGTSVTPR	O60343	TBC1D4	TBC1 domain family member 4	O60343 [749-768]	T(1): 31.9; S(2): 31.9; S(3): 31.9; T(4): 3.9; S(6): 0.5; S(9): 0.0; S(11): 0.0; T(15): 0.0; S(16): 0.0; T(18): 0.0		3	-0.54	0.115394	0.1	0.861171	-0.65	0.203645
FSPFLQTAEDNTQDEVAGAPADHHGPSDEEQGSPPEDK	Q92766	RREB1	Ras-responsive element-binding protein 1	Q92766 [1193-1230]	S(2): 0.0; T(7): 0.0; T(12): 0.0; S(27): 100.0; S(33): 100.0	Q92766 2xPhospho [S1219(98.8); S1225(100)]	2	-0.54	0.0383142	-0.09	0.813481	-0.45	0.203645
RPPSSSSSSSASSYTGRPIELDK	Q9BZL6	PRKD2	Serine/threonine-protein kinase D2	Q9BZL6 [233-255]	S(4): 87.1; S(5): 11.1; S(6): 1.5; S(7): 0.2; S(8): 0.0; S(9): 0.0; S(10): 0.0; S(12): 0.0; S(13): 0.0; Y(14): 0.0; T(15): 0.0	Q9BZL6 1xPhospho [S236(87.1)]	2	0.6	0.0341098	0.13	0.769342	0.46	0.203831
GDLPSDSGFSDPESEAK	Q8TEK3	DOT1L	Histone-lysine N-methyltransferase, H3 lysine-79 specific	Q8TEK3 [1026-1042]	S(5): 9.4; S(7): 81.2; S(10): 9.4; S(14): 0.0	Q8TEK3 1xPhospho [S1035(100)]	2	0.07	0.784171	0.51	0.11483	-0.45	0.203831
YSQSAPGSPVSAQPVIMAVPPR	P85037	FOXK1	Forkhead box protein K1	P85037 [465-486]	Y(1): 33.3; S(2): 33.3; S(4): 33.3; S(8): 99.9; S(11): 0.1	P85037 2xPhospho [S472(99.8); Y/S]	1	-0.37	0.288513	0.27	0.544797	-0.63	0.204089
SGGGGSSVSGGGGGGGAGAGGCGGPGGALTRRAVTLR	Q8N594	MPND	MPN domain-containing protein	Q8N594 [42-78]	S(1): 0.1; S(6): 0.1; S(7): 0.1; S(9): 0.2; T(30): 99.8; T(35): 99.8	Q8N594 2xPhospho [T71(99.8); T76(99.8)]	1	0.98	0.034158	0.26	0.768195	0.71	0.204626
RWDQTADQTPGATPK	O75533	SF3B1	Splicing factor 3B subunit 1	O75533 [199-213]	T(5): 0.0; T(9): 0.0; T(13): 100.0	O75533 1xPhospho [T211(100)]	2	0.43	0.0552507	0.05	0.929003	0.37	0.204626
KLSMGSDDAAYTQALLVHQK	Q9NYJ8	TAB2	TGF-beta-activated kinase 1 and MAP3K7-binding protein 2	Q9NYJ8 [522-541]	S(3): 50.0; S(6): 50.0; Y(11): 0.0; T(12): 0.0		2	0.39	0.271437	-0.31	0.566308	0.7	0.204626
YPSCESVTDEYAGHLIQILK	Q9UKA4	AKAP11	A-kinase anchor protein 11	Q9UKA4 [1335-1354]	Y(1): 0.2; S(3): 92.0; S(6): 92.0; T(8): 15.8; Y(11): 0.0	Q9UKA4 2xPhospho [S1340(98.8); T1342(90.1)]	12	-0.43	0.0728389	0.02	0.994678	-0.45	0.204755
QTDVEEWTSWDEDAPTSVK	O00559	EBAG9	Receptor-binding cancer antigen expressed on SiSo cells	O00559 [54-72]	T(2): 0.1; T(8): 50.0; S(9): 50.0; T(16): 0.0; S(17): 0.0		2	0.91	0.0307673	0.19	0.736701	0.72	0.204797
KQSFDDNDSEELEDKDSK	O60841	EIF5B	Eukaryotic translation initiation factor 5B	O60841 [105-122]	S(3): 0.0; S(9): 100.0; S(17): 0.0	O60841 1xPhospho [S113(100)]	3	-0.09	0.853505	0.6	0.203323	-0.69	0.204797
LQEKLSPPYSSPQEFAQDVGR	Q13263	TRIM28	Transcription intermediary factor 1-beta	Q13263 [747-767]	S(6): 100.0; Y(9): 0.0; S(10): 0.0; S(11): 0.0	Q13263 1xPhospho [S752(99.9)]	3	0.41	0.102168	-0.08	0.902062	0.49	0.20487
REPGYTPPGAGNQNPPGMYPVTGPK	Q93052	LPP	Lipoma-preferred partner	Q93052 [328-352]	Y(5): 50.0; T(6): 50.0; Y(19): 0.0; T(22): 0.0		2	0.23	0.342668	-0.26	0.486967	0.49	0.20487
KETESEAEDNLDDLEK	Q8IYB3	SRRM1	Serine/arginine repetitive matrix protein 1	Q8IYB3 [870-885]	T(3): 0.0; S(5): 100.0	Q8IYB3 1xPhospho [T872(100)]	10	-0.37	0.0757324	0.01	0.984669	-0.38	0.20487
SATDADVVNSGWLVVGK	Q92538	GBF1	Golgi-specific brefeldin A-resistance guanine nucleotide exchange factor 1	Q92538 [1335-1351]	S(1): 6.1; T(3): 93.9; S(10): 0.0	Q92538 1xPhospho [T1337(85)]	5	-0.44	0.0953406	0.05	0.919598	-0.49	0.20487
IPGPGTPVKYSEVVLDSEPK	Q9Y3P8	SIT1	Signaling threshold-regulating transmembrane adapter 1	Q9Y3P8 [139-158]	T(6): 46.7; Y(10): 46.7; S(11): 6.6; S(17): 0.0		1	1.25	0.0277342	0.41	0.696978	0.83	0.205012
DLSTSPKPSPIPSPVLGR	Q8NDI1	EHBP1	EH domain-binding protein 1	Q8NDI1 [424-441]	S(3): 9.0; T(4): 82.1; S(5): 9.0; S(9): 0.0; S(13): 0.0	Q8NDI1 1xPhospho [T427(82.1)]	1	0.64	0.00773647	0.34	0.284032	0.3	0.205012
KADTEEEFLAFR	P46013	MKI67	Antigen KI-67	P46013 [1761-1772]	T(4): 100.0	P46013 1xPhospho [T1764(100)]	1	0.75	0.0737862	-0.01	0.993616	0.77	0.205554
ASSPAQCVTPVQTVV	Q13614	MTMR2	Myotubularin-related protein 2	Q13614 [629-643]	S(2): 7.3; S(3): 92.7; T(9): 0.0; T(13): 0.0		3	0.27	0.296791	-0.25	0.539473	0.53	0.205554
GISPVVSEHR	Q99700	ATXN2	Ataxin-2	Q99700 [782-791]	S(3): 100.0; S(7): 0.0	Q99700 1xPhospho [S784(100)]	1	1.12	0.0306552	0.33	0.732872	0.8	0.205633
SCSLLSTEAGALHVLLPAR	P52333	JAK3	Tyrosine-protein kinase JAK3	P52333 [15-33]	S(1): 50.0; S(3): 50.0; S(6): 50.0; T(7): 50.0		1	0.87	0.00984262	1.18	0.0063497	-0.31	0.206087
AAAAGLGHPASPGGSEDGPPGSEEEDAAR	Q99856	ARID3A	AT-rich interactive domain-containing protein 3A	Q99856 [67-95]	S(11): 100.0; S(15): 0.0; S(22): 0.0	Q99856 1xPhospho [S77(100)]	9	0.07	0.737056	0.45	0.107439	-0.37	0.206087
APGGESLLGPGPSPPSALTPGLGAEAGGGFPGGAEPGNGLKPR	Q9Y5B6	GCFC1; PAXBP1	PAX3- and PAX7-binding protein 1	Q9Y5B6 [50-92]	S(6): 0.1; S(13): 17.2; S(16): 65.5; T(19): 17.2		1	-0.35	0.13053	0.07	0.824715	-0.42	0.206087
RSSQPSPTAVPASDSPPTKQEVK	Q3KQU3	MAP7D1	MAP7 domain-containing protein 1	Q3KQU3 [111-133]	S(2): 0.0; S(3): 0.0; S(6): 0.0; T(8): 0.0; S(13): 1.4; S(15): 98.6; T(18): 0.0	Q3KQU3 1xPhospho [S125(98.6)]	1	-1.12	0.00115871	-0.6	0.0426539	-0.53	0.206087
VASGVLSPPPAAPPPSSSSVPEAGGPPIKK	Q8IXM2	C17orf49; RNASEK-C17orf49	Chromatin complexes subunit BAP18	Q8IXM2 [104-133]	S(3): 50.0; S(7): 50.0; S(16): 0.0; S(17): 0.0; S(18): 0.0; S(19): 0.0		1	-0.95	0.00637611	-0.36	0.234631	-0.59	0.206937
QDKPMDTSVLSEEGGEPFQK	Q12888	TP53BP1	Tumor suppressor p53-binding protein 1	Q12888 [388-407]	T(7): 50.0; S(8): 50.0; S(11): 0.0	Q12888 1xPhospho [S398(88.4)]	2	0	0.995277	0.38	0.163799	-0.38	0.207657
RPGNSTVTSSPPVTPK	Q7Z2Z1	TICRR	Treslin	Q7Z2Z1 [1294-1309]	S(5): 20.0; T(6): 20.0; T(8): 20.0; S(9): 20.0; S(10): 20.0; T(14): 100.0	Q7Z2Z1 2xPhospho [S1303(99.5); T1307(100)]	5	0.91	0.00975755	0.51	0.342924	0.39	0.207812
STSTLEIQPSRASPTSDIESVER	Q96JK2	DCAF5	DDB1- and CUL4-associated factor 5	Q96JK2 [636-658]	S(1): 0.0; T(2): 0.0; S(3): 0.0; T(4): 0.0; S(10): 0.0; S(13): 46.9; T(15): 6.2; S(16): 46.9; S(20): 0.0		1	-0.53	0.0210365	-0.12	0.590261	-0.41	0.207966
SRVFDLQFSTDSPR	Q15003	NCAPH	Condensin complex subunit 2	Q15003 [70-83]	S(1): 100.0; S(9): 0.9; T(10): 8.4; S(12): 90.8	Q15003 2xPhospho [S70(100); S81(90.8)]	1	2.15	0.0348806	0.75	0.767563	1.39	0.20813
DTLLSPDSSFEYVPPKPK	O95239	KIF4A	Chromosome-associated kinesin KIF4A	O95239 [1009-1026]	T(2): 0.5; S(5): 6.2; S(8): 87.0; S(9): 6.2; Y(12): 0.0	O95239 1xPhospho [S1016(87)]	3	1.41	0.0092644	1.85	0.00624544	-0.44	0.20813
GPEAAGLSSPLSFPSQR	Q8TEK3	DOT1L	Histone-lysine N-methyltransferase, H3 lysine-79 specific	Q8TEK3 [1341-1357]	S(8): 2.0; S(9): 98.0; S(12): 0.0; S(15): 0.0	Q8TEK3 1xPhospho [S1349(98)]	1	0.17	0.383087	0.51	0.057717	-0.34	0.20813
VQRPEDASGGSSPSGTSK	Q9UI08	EVL	Ena/VASP-like protein	Q9UI08 [235-252]	S(8): 0.0; S(11): 6.7; S(12): 93.3; S(14): 0.0; T(16): 0.0; S(17): 0.0	Q9UI08 1xPhospho [S248(89.5)]	3	1.14	0.00129515	0.79	0.0483637	0.36	0.208339
STDSEVSQSPAK	O75175	CNOT3	CCR4-NOT transcription complex subunit 3	O75175 [291-302]	S(1): 0.0; T(2): 0.0; S(4): 0.0; S(7): 0.0; S(9): 100.0	O75175 1xPhospho [S299(100)]	1	0.3	0.169589	0.65	0.0316878	-0.35	0.208339
IEIIQPLLDMAAGTSNAAPVAENVTNNEGSPPPPVK	O95104	SCAF4	Splicing factor, arginine/serine-rich 15	O95104 [125-160]	T(14): 0.0; S(15): 0.0; T(25): 99.8; S(30): 0.2		15	-0.39	0.138186	0.1	0.809888	-0.49	0.208339
SESGGLGVSMVEYVLSSSPADKLDSR	Q8TB72	PUM2	Pumilio homolog 2	Q8TB72 [85-110]	S(1): 0.0; S(3): 0.0; S(9): 0.0; Y(13): 0.0; S(16): 0.2; S(17): 10.5; S(18): 88.0; S(25): 1.3	Q8TB72 1xPhospho [S102(88)]	2	-0.31	0.318002	-1.25	0.0496037	0.93	0.208718
QSLGELIGTLNAAK	P60174	TPI1	Triosephosphate isomerase	P60174 [57-70]	S(2): 100.0; T(9): 0.0	P60174 1xPhospho [S58(100)]	11	-0.62	0.0213075	-0.17	0.591947	-0.44	0.208789
KGAILSEEELAAMSPTAAAVAK	P12270	TPR	Nucleoprotein TPR	P12270 [366-387]	S(6): 0.0; S(14): 99.6; T(16): 0.5	P12270 1xPhospho [S379(99.6)]	2	0.61	0.0202956	0.21	0.574016	0.4	0.208927
YGSKNTDQGVYLGLSK	Q13190	STX5	Syntaxin-5	Q13190 [7-22]	Y(1): 98.7; S(3): 1.1; T(6): 0.1; Y(11): 0.0; S(15): 0.0	Q13190 1xPhospho [Y7(98.7)]	1	0.19	0.440148	-0.33	0.408692	0.52	0.208927
LSPPAGLFTSAR	P42229	STAT5A	Signal transducer and activator of transcription 5A	P42229 [779-790]	S(2): 100.0; T(9): 0.0; S(10): 0.0	P42229 1xPhospho [S780(100)]	2	-0.28	0.220264	0.13	0.652485	-0.41	0.208927
HTVVEHLVSHHSPQR	Q5T0B9	ZNF362	Zinc finger protein 362	Q5T0B9 [393-407]	T(2): 0.0; S(9): 0.0; S(12): 100.0	Q5T0B9 1xPhospho [S404(100)]	2	-0.89	0.0291842	-0.26	0.708145	-0.63	0.208927
SRPTSEGSDIESTEPQK	Q4G0J3	LARP7	La-related protein 7	Q4G0J3 [254-270]	S(1): 0.1; T(4): 8.7; S(5): 8.7; S(8): 82.4; S(12): 0.0; T(13): 0.0	Q4G0J3 1xPhospho [S261(82.4)]	2	-0.44	0.104047	0.04	0.903755	-0.49	0.208942
ASGLLKSPASLK	P51957	NEK4	Serine/threonine-protein kinase Nek4	P51957 [334-345]	S(2): 0.0; S(7): 100.0; S(10): 0.0	P51957 1xPhospho [S340(100)]	1	0.92	0.000942098	0.63	0.033514	0.29	0.210038
NENTEGSPQEDGVELEGLK	P11388	TOP2A	DNA topoisomerase 2-alpha	P11388 [1241-1259]	T(4): 0.1; S(7): 99.9		13	-0.51	0.0378659	-0.07	0.794158	-0.44	0.210276
GILSLPHQASPVSR	O75925	PIAS1	E3 SUMO-protein ligase PIAS1	O75925 [494-507]	S(4): 0.0; S(10): 92.6; S(13): 7.4	O75925 1xPhospho [S503(92.6)]	1	0.92	0.0231688	0.33	0.618453	0.59	0.210656
AQDEIPALSVSRPQTGLSFLGPEPEDLEDLYSR	P43686	PSMC4	26S protease regulatory subunit 6B	P43686 [11-43]	S(9): 49.3; S(11): 49.3; T(15): 0.7; S(18): 0.7; Y(31): 0.0; S(32): 0.0		2	0.68	0.0520717	0.08	0.900188	0.6	0.210844
METVSNASSSSNPSSPGR	Q9NTI5	PDS5B	Sister chromatid cohesion protein PDS5 homolog B	Q9NTI5 [1152-1169]	T(3): 0.0; S(5): 0.0; S(8): 0.0; S(9): 0.0; S(10): 0.0; S(11): 0.0; S(14): 0.1; S(15): 100.0	Q9NTI5 1xPhospho [S1166(100)]	2	0.59	0.060158	0.98	0.0173351	-0.4	0.210899
NKVSEEHDVLR	P14317	HCLS1	Hematopoietic lineage cell-specific protein	P14317 [59-69]	S(4): 100.0	P14317 1xPhospho [S62(100)]	1	0.37	0.117239	-0.08	0.870004	0.44	0.210899
FFAGSQEPMATFPVPYDLPPELYGSK	Q9NUW8	TDP1	Tyrosyl-DNA phosphodiesterase 1	Q9NUW8 [559-584]	S(5): 99.7; T(11): 0.3; Y(16): 0.0; Y(23): 0.0; S(25): 0.0	Q9NUW8 1xPhospho [S563(99.7)]	1	1.7	0.00175624	2.07	0.00283956	-0.38	0.211203
QICVVMLETLSQSPPK	Q15366	PCBP2	Poly(rC)-binding protein 2	Q15366 [161-176]	T(9): 0.0; S(11): 0.0; S(13): 100.0	Q15366 1xPhospho [S173(91.5)]	5	0.1	0.64316	0.43	0.0956416	-0.33	0.211203
KPMKTSPEMDIQNPDDGAR	P46013	MKI67	Antigen KI-67	P46013 [3123-3141]	T(5): 89.9; S(6): 10.1	P46013 1xPhospho [T3127(89.9)]	1	0.71	0.00850244	0.37	0.301251	0.35	0.211359
GSSPSIRPIQGSQGSSSPVEK	Q92560	BAP1	Ubiquitin carboxyl-terminal hydrolase BAP1	Q92560 [581-601]	S(2): 11.5; S(3): 86.9; S(5): 1.6; S(12): 0.6; S(15): 33.1; S(16): 33.1; S(17): 33.1	Q92560 2xPhospho [S583(86.9); S]	1	-0.12	0.560303	0.27	0.336091	-0.4	0.211406
PQCPVGLNTLAFPSINRK	Q9HAT8	PELI2	E3 ubiquitin-protein ligase pellino homolog 2	Q9HAT8 [282-299]	T(9): 0.0; S(14): 100.0	Q9HAT8 1xPhospho [S295(100)]	1	-1.08	0.00376559	-0.42	0.146998	-0.65	0.211484
ANSNLVLQADRSLIDR	O75643	SNRNP200	U5 small nuclear ribonucleoprotein 200 kDa helicase	O75643 [15-30]	S(3): 0.0; S(12): 100.0	O75643 1xPhospho [S26(100)]	1	1.03	0.026673	0.34	0.668493	0.69	0.21161
LYLDELEGGGNPGASCKDTSGEIK	Q9HD26	GOPC	Golgi-associated PDZ and coiled-coil motif-containing protein	Q9HD26 [393-416]	Y(2): 0.0; S(15): 96.0; T(19): 2.0; S(20): 2.0	Q9HD26 1xPhospho [S407(96)]	2	1.44	0.000343825	1.15	0.00973878	0.28	0.211719
SVLCSTPTINIPASPFMQK	Q96KB5	PBK	Lymphokine-activated killer T-cell-originated protein kinase	Q96KB5 [19-37]	S(1): 6.1; S(5): 87.7; T(6): 6.1; T(8): 0.0; S(14): 100.0	Q96KB5 2xPhospho [S23(87.7); S32(100)]	2	1.16	0.0222649	0.45	0.601549	0.72	0.212009
LDIPTGTTPQR	P52732	KIF11	Kinesin-like protein KIF11	P52732 [919-929]	T(5): 0.7; T(7): 7.6; T(8): 91.7	P52732 1xPhospho [T926(91.7)]	3	1.02	0.00168771	1.3	0.00279238	-0.28	0.212385
AETPTESVSEPEVATKQELQEEEEQTKPPR	P18858	LIG1	DNA ligase 1	P18858 [193-222]	T(3): 87.1; T(5): 6.3; S(7): 6.3; S(9): 0.2; T(15): 0.2; T(26): 0.0	P18858 1xPhospho [T195(87.1)]	1	0.74	0.00380043	0.43	0.147521	0.32	0.212385
IVAHAVEVPAVQSPRRSPR	Q96FF9	CDCA5	Sororin	Q96FF9 [63-81]	S(13): 100.0; S(17): 100.0	Q96FF9 2xPhospho [S75(100); S79(100)]	1	0.71	0.0161106	1.06	0.00801574	-0.35	0.212385
AQSPGAVEEILDRENKR	Q9NYM9	BET1L	BET1-like protein	Q9NYM9 [7-23]	S(3): 100.0	Q9NYM9 1xPhospho [S9(100)]	1	0.21	0.386669	-0.36	0.460373	0.58	0.212385
YQQITPVNQSR	Q9NYL2	ZAK	Mitogen-activated protein kinase kinase kinase MLT	Q9NYL2 [624-634]	Y(1): 0.0; T(5): 0.0; S(10): 100.0	Q9NYL2 1xPhospho [S633(100)]	1	-0.1	0.739061	0.33	0.25294	-0.42	0.212385
SESGGLGVSMVEYVLSSSPADK	Q8TB72	PUM2	Pumilio homolog 2	Q8TB72 [85-106]	S(1): 0.0; S(3): 0.0; S(9): 0.0; Y(13): 0.0; S(16): 0.0; S(17): 1.8; S(18): 98.1	Q8TB72 1xPhospho [S102(98.1)]	1	0.36	0.0803327	-0.01	0.982872	0.37	0.212398
SGSSSPDSEITELK	P17812	CTPS1	CTP synthase 1	P17812 [571-584]	S(1): 99.6; S(3): 94.4; S(4): 5.6; S(5): 0.4; S(8): 0.0; T(11): 0.0	P17812 2xPhospho [S571(99.6); S/T]	8	-0.07	0.810188	0.39	0.225246	-0.46	0.212431
LGSVDSFER	O60343	TBC1D4	TBC1 domain family member 4	O60343 [586-594]	S(3): 99.9; S(6): 0.1		3	0.05	0.737056	-0.26	0.254024	0.31	0.212592
AETEEAAHSVSQEMSVNSPTAQESQR	Q9NUA8	ZBTB40	Zinc finger and BTB domain-containing protein 40	Q9NUA8 [173-198]	T(3): 0.0; S(9): 0.0; S(11): 0.0; S(15): 0.0; S(18): 87.9; T(20): 12.1; S(24): 0.0	Q9NUA8 1xPhospho [S190(87.9)]	1	0.64	0.143228	-0.19	0.809219	0.82	0.212731
ESQLAHIKDEPPPLSPAPLTPATPSSLDPFFSR	Q7Z6Z7	HUWE1	E3 ubiquitin-protein ligase HUWE1	Q7Z6Z7 [3905-3937]	S(2): 0.6; S(15): 99.4; T(20): 0.0; T(23): 0.0; S(25): 0.0; S(26): 0.0; S(32): 0.0	Q7Z6Z7 1xPhospho [S3919(99.4)]	2	0.44	0.206339	-0.27	0.686335	0.72	0.212731
SSPATSLFVELDEEEVK	Q9BXK5	BCL2L13	Bcl-2-like protein 13	Q9BXK5 [370-386]	S(1): 4.6; S(2): 95.1; T(5): 0.2; S(6): 0.0		11	-0.29	0.190382	0.09	0.712485	-0.38	0.212731
SESVVSGLDSPAK	O14578	CIT	Citron Rho-interacting kinase	O14578 [431-443]	S(1): 0.0; S(3): 0.0; S(6): 6.5; S(10): 93.5	O14578 1xPhospho [S440(93.5)]	6	-0.31	0.119948	0.04	0.86864	-0.35	0.212731
NTPSPDVTLGTNPGTEDIQFPIQK	Q8IX01	SUGP2	SURP and G-patch domain-containing protein 2	Q8IX01 [274-297]	T(2): 89.7; S(4): 10.2; T(8): 0.2; T(11): 0.0; T(15): 0.0	Q8IX01 1xPhospho [T275(89.7)]	3	-0.61	0.0971055	0.15	0.929749	-0.76	0.212731
IASKYHDLECQLIQEFTSAQR	O00471	EXOC5	Exocyst complex component 5	O00471 [185-205]	S(3): 12.2; Y(5): 87.8; T(17): 0.0; S(18): 0.0	O00471 1xPhospho [Y189(87.8)]	2	2.78	0.00597095	3.33	0.00500778	-0.57	0.213045
GGKDPLSSPGGPGSR	Q32P44	EML3	Echinoderm microtubule-associated protein-like 3	Q32P44 [191-205]	S(7): 11.8; S(8): 88.1; S(14): 0.1	Q32P44 1xPhospho [S198(88.1)]	1	1.75	0.00624161	1.05	0.22249	0.7	0.213045
GKSESQMDITDINTPKPK	P08473	MME	Neprilysin	P08473 [2-19]	S(3): 50.0; S(5): 50.0; T(10): 0.0; T(14): 0.0	P08473 1xPhospho [S6(99.7)]	3	0.02	0.901815	0.49	0.14504	-0.46	0.213045
RQSSIFGGADVGFSGGIPSPDKGHR	Q9P2Y5	UVRAG	UV radiation resistance-associated gene protein	Q9P2Y5 [480-504]	S(3): 0.0; S(4): 0.0; S(14): 0.0; S(19): 100.0	Q9P2Y5 1xPhospho [S498(100)]	1	-0.07	0.767596	0.26	0.24331	-0.33	0.213045
ISLGSSIDSVSEGPLLSEGSLSEEEGDQDGQPLLK	Q5VT06	CEP350	Centrosome-associated protein 350	Q5VT06 [973-1007]	S(2): 0.0; S(5): 0.0; S(6): 0.0; S(9): 0.2; S(11): 1.7; S(17): 1.7; S(20): 1.7; S(22): 94.8	Q5VT06 1xPhospho [S994(94.8)]	3	-0.53	0.016179	-0.16	0.486945	-0.37	0.213045
VQSVPLAATTFTSPSNTPASISPK	Q63HK5	TSHZ3	Teashirt homolog 3	Q63HK5 [442-465]	S(3): 0.0; T(9): 0.0; T(10): 0.0; T(12): 0.0; S(13): 0.0; S(15): 0.0; T(17): 0.0; S(20): 0.2; S(22): 99.8	Q63HK5 1xPhospho [S463(99.8)]	2	-0.9	0.00368492	-0.43	0.141841	-0.47	0.213045
DLKPENILCESPEK	Q9BUB5	MKNK1	MAP kinase-interacting serine/threonine-protein kinase 1	Q9BUB5 [211-224]	S(11): 100.0	Q9BUB5 1xPhospho [S221(100)]	1	-0.15	0.550304	0.26	0.345473	-0.41	0.213311
ALIQTCLNSPDSPPR	P11831	SRF	Serum response factor	P11831 [213-227]	T(5): 0.0; S(9): 0.5; S(12): 99.5	P11831 1xPhospho [S224(100)]	2	-0.43	0.101289	0.06	0.920115	-0.49	0.213403
SAAKSPVDIVTGGISPVR	P50851	LRBA	Lipopolysaccharide-responsive and beige-like anchor protein	P50851 [1484-1501]	S(1): 0.0; S(5): 100.0; T(11): 0.0; S(15): 0.0	P50851 1xPhospho [S1488(100)]	1	1.44	0.00251002	0.97	0.098489	0.47	0.214306
EVHDELEDLPSPPPPLSPPPTTSPHK	Q9NQX3	GPHN	Gephyrin	Q9NQX3 [178-203]	S(11): 100.0; S(17): 99.9; T(21): 33.4; T(22): 33.4; S(23): 33.4	Q9NQX3 3xPhospho [S188(100); S194(99.9); T/S]	2	-0.08	0.762488	0.33	0.246992	-0.41	0.214306
ATLGPTPTTPPQPPDPSQPPPGPMQH	O60927	PPP1R11	Protein phosphatase 1 regulatory subunit 11	O60927 [101-126]	T(2): 0.0; T(6): 1.5; T(8): 87.1; T(9): 11.3; S(17): 0.0	O60927 1xPhospho [T108(81.5)]	3	1.01	0.00517175	0.57	0.189148	0.44	0.214307
LKSPSQKQDGGTAPVASASPK	Q96T37	RBM15	Putative RNA-binding protein 15	Q96T37 [763-783]	S(3): 49.5; S(5): 1.1; T(12): 49.5; S(17): 0.0; S(19): 0.0		1	0.9	0.00293231	0.53	0.113479	0.37	0.214307
DVDELPSLQPSVGSPSRPSSSR	O43815	STRN	Striatin	O43815 [363-384]	S(7): 0.0; S(11): 0.0; S(14): 8.7; S(16): 91.0; S(19): 0.1; S(20): 0.1; S(21): 0.1	O43815 1xPhospho [S378(91)]	2	0.88	0.00340436	0.54	0.131113	0.35	0.214307
DLKEELCPGNLSLVDTR	Q6PCB5	RSBN1L	Round spermatid basic protein 1-like protein	Q6PCB5 [812-828]	S(12): 100.0; T(16): 0.0	Q6PCB5 1xPhospho [S823(100)]	2	1.43	0.000394576	1.13	0.0113306	0.3	0.214391
SWIEEQAMGSFLSVAK	P28838	LAP3	Cytosol aminopeptidase	P28838 [238-253]	S(1): 100.0; S(10): 0.0; S(13): 0.0	P28838 1xPhospho [S238(100)]	1	0.31	0.244334	0.73	0.0417809	-0.41	0.214391
AAPPPPALTPDSQTVDSSCK	Q9H7N4	SCAF1	Splicing factor, arginine/serine-rich 19	Q9H7N4 [981-1000]	T(9): 100.0; S(12): 0.0; T(14): 0.0; S(17): 0.0; S(18): 0.0	Q9H7N4 1xPhospho [T989(100)]	2	-0.52	0.112448	0.01	0.893957	-0.54	0.214391
ILVSIGESFGTSEK	P06400	RB1	Retinoblastoma-associated protein	P06400 [831-844]	S(4): 0.1; S(8): 99.9; T(11): 99.2; S(12): 0.8	P06400 2xPhospho [S838(99.9); T841(99.2)]	1	0.94	0.011516	0.45	0.374179	0.49	0.214825
NGDECAYHHPISPCK	Q6PJT7	ZC3H14	Zinc finger CCCH domain-containing protein 14	Q6PJT7 [609-623]	Y(7): 0.0; S(12): 100.0	Q6PJT7 1xPhospho [S620(100)]	3	-0.04	0.917169	0.48	0.193195	-0.51	0.214825
GLAAGSAETLPANFR	Q13136	PPFIA1	Liprin-alpha-1	Q13136 [1151-1165]	S(6): 0.0; T(9): 100.0	Q13136 1xPhospho [T1159(100)]	1	0.28	0.244376	-0.2	0.631438	0.48	0.2156
PQALDATQVPSPLPLAQPSTPPVR	O95402	MED26	Mediator of RNA polymerase II transcription subunit 26	O95402 [304-327]	T(7): 0.0; S(11): 100.0; S(19): 50.0; T(20): 50.0	O95402 2xPhospho [S314(100); S/T]	2	-0.42	0.109258	0.07	0.903419	-0.5	0.2156
TTLVDSFSPESQAVEENIHDDPIR	Q6PIZ9	TRAT1	T-cell receptor-associated transmembrane adapter 1	Q6PIZ9 [150-173]	T(1): 0.0; T(2): 0.0; S(6): 3.3; S(8): 96.0; S(11): 0.7	Q6PIZ9 1xPhospho [S157(96)]	1	-0.06	0.801495	-1.01	0.125524	0.95	0.216049
CQTLFGFDSDDESA	Q8IZM8	ZNF654	Zinc finger protein 654	Q8IZM8 [568-581]	T(3): 0.0; S(9): 99.5; S(13): 0.5		2	-1.29	0.00247277	-0.53	0.0957637	-0.76	0.216474
SKGESDDFHMDFDSAVAPR	P11388	TOP2A	DNA topoisomerase 2-alpha	P11388 [1491-1509]	S(1): 0.0; S(5): 100.0; S(14): 0.0	P11388 1xPhospho [S1495(100)]	1	0.76	0.0519297	0.12	0.885721	0.64	0.216903
WDQTADQTPGATPK	O75533	SF3B1	Splicing factor 3B subunit 1	O75533 [200-213]	T(4): 0.0; T(8): 100.0; T(12): 100.0	O75533 2xPhospho [T207(100); T211(100)]	1	0.17	0.584612	0.62	0.0900828	-0.47	0.217224
RRTASPPPPPK	Q8IYB3	SRRM1	Serine/arginine repetitive matrix protein 1	Q8IYB3 [612-622]	T(3): 100.0; S(5): 100.0	Q8IYB3 2xPhospho [T614(100); S616(100)]	4	0	0.987049	0.39	0.175316	-0.39	0.217471
LRSPAQYQVVLSER	Q6XQN6	NAPRT1; NAPRT	Nicotinate phosphoribosyltransferase	Q6XQN6 [511-524]	S(3): 100.0; Y(7): 0.0; S(12): 0.0	Q6XQN6 1xPhospho [S513(100)]	1	-0.66	0.280925	0.36	0.584241	-1.03	0.217471
SPTMEQAVQTASAHLPAPAAVGR	Q8ND56	LSM14A	Protein LSM14 homolog A	Q8ND56 [192-214]	S(1): 98.7; T(3): 1.3; T(10): 0.0; S(12): 0.0	Q8ND56 1xPhospho [S192(99.8)]	2	1.44	0.00512513	0.86	0.185226	0.57	0.217589
TPSGEVQTVLVQDSPPATAAATSNTTCSSPASR	Q02086	SP2	Transcription factor Sp2	Q02086 [358-390]	T(1): 0.0; S(3): 0.0; T(8): 0.0; S(14): 4.7; T(18): 93.4; T(22): 1.1; S(23): 0.3; T(25): 0.3; T(26): 0.1; S(28): 0.1; S(29): 0.0; S(32): 0.0	Q02086 1xPhospho [T375(93.4)]	1	0.43	0.487479	-1.19	0.390835	1.62	0.217906
GPVQEDKGEQLSPGGLLCGVGVEGEAVQNGPASHSR	Q14699	RFTN1	Raftlin	Q14699 [510-545]	S(12): 100.0; S(33): 0.0; S(35): 0.0	Q14699 1xPhospho [S521(100)]	1	0.34	0.227788	-0.23	0.662555	0.56	0.217906
LQIGPPSPGEAQGPLLPSPAR	Q9HCH0	NCKAP5L	Nck-associated protein 5-like	Q9HCH0 [430-450]	S(7): 100.0; S(18): 0.0	Q9HCH0 1xPhospho [S436(100)]	1	0.51	0.0539013	0.13	0.895764	0.38	0.217953
SGSPSDNSGAEEMEVSLAKPK	P31749	AKT1	RAC-alpha serine/threonine-protein kinase	P31749 [122-142]	S(1): 4.3; S(3): 45.7; S(5): 45.7; S(8): 4.3; S(16): 0.0		2	-0.18	0.465023	0.25	0.407395	-0.43	0.217953
NSSSGVSPLYSPVSFCGIPVGVLQNK	Q9BZH6	WDR11	WD repeat-containing protein 11	Q9BZH6 [396-421]	S(2): 9.0; S(3): 9.0; S(4): 9.0; S(7): 73.0; Y(10): 0.0; S(11): 0.0; S(14): 0.0		4	-0.68	0.0123132	-0.25	0.387625	-0.43	0.218111
TGSNISGASSDISLDEQYK	P22059	OSBP	Oxysterol-binding protein 1	P22059 [377-395]	T(1): 7.7; S(3): 0.7; S(6): 0.7; S(9): 0.7; S(10): 90.2; S(13): 0.0; Y(18): 0.0	P22059 1xPhospho [T377(93)]	10	-0.69	0.0245532	-0.15	0.621632	-0.53	0.218111
MDTVDIANNSTLGKPK	Q9H930	SP140L	Nuclear body protein SP140-like protein	Q9H930 [194-209]	T(3): 0.0; S(10): 91.6; T(11): 8.4	Q9H930 1xPhospho [S203(91.6)]	1	1.44	0.00166929	1.02	0.0610206	0.41	0.218293
AAVATFLQSVQVPEFTPK	P22314	UBA1	Ubiquitin-like modifier-activating enzyme 1	P22314 [785-802]	T(5): 0.0; S(9): 0.0; T(16): 100.0	P22314 1xPhospho [T800(100)]	2	-0.06	0.861616	-0.84	0.138876	0.78	0.218293
FSPPRHELSPPQK	Q9BXP5	SRRT	Serrate RNA effector molecule homolog	Q9BXP5 [66-78]	S(2): 100.0; S(9): 100.0	Q9BXP5 2xPhospho [S67(100); S74(100)]	1	-0.23	0.264147	0.14	0.609752	-0.38	0.218293
KSFSEDVFQSVK	Q9UKA4	AKAP11	A-kinase anchor protein 11	Q9UKA4 [17-28]	S(2): 100.0; S(4): 0.0; S(10): 0.0	Q9UKA4 1xPhospho [S18(100)]	1	0.71	0.0147374	0.32	0.44253	0.39	0.218519
GERDSQTQAILTK	Q13098	GPS1	COP9 signalosome complex subunit 1	Q13098 [236-248]	S(5): 0.4; T(7): 99.6; T(12): 0.0	Q13098 1xPhospho [T242(99.6)]	1	0.45	0.362717	1.09	0.0581113	-0.65	0.218519
KPPAPPSPVQSQSPSTNWSPAVPVK	Q8IYB3	SRRM1	Serine/arginine repetitive matrix protein 1	Q8IYB3 [763-787]	S(7): 99.1; S(11): 1.7; S(13): 89.9; S(15): 8.4; T(16): 0.8; S(19): 0.0	Q8IYB3 2xPhospho [S769(99.1); S/T]	7	0.05	0.857702	0.47	0.138259	-0.42	0.218519
TAAALAPASLTSAR	Q9UQ35	SRRM2	Serine/arginine repetitive matrix protein 2	Q9UQ35 [2357-2370]	T(1): 0.0; S(9): 6.0; T(11): 47.0; S(12): 47.0		1	0.92	0.0971055	-0.1	0.942239	1	0.218781
KLTSDEEGEPSGK	Q8WVC0	LEO1	RNA polymerase-associated protein LEO1	Q8WVC0 [627-639]	T(3): 0.4; S(4): 99.6; S(11): 0.0		2	0.07	0.763935	0.37	0.120094	-0.31	0.218827
NAFDLFKLTPEEK	Q99549	MPHOSPH8	M-phase phosphoprotein 8	Q99549 [446-458]	T(9): 100.0	Q99549 1xPhospho [T454(100)]	1	1.76	0.0323563	0.64	0.719232	1.13	0.219704
ATLGPTPTTPPQPPDPSQPPPGPMQH	O60927	PPP1R11	Protein phosphatase 1 regulatory subunit 11	O60927 [101-126]	T(2): 0.4; T(6): 0.4; T(8): 85.2; T(9): 13.9; S(17): 0.0	O60927 1xPhospho [T109(84.8)]	5	0.68	0.0119535	0.28	0.375905	0.4	0.219704
ASPSPQPSSQPLQIHRQTPESK	Q9HC35	EML4	Echinoderm microtubule-associated protein-like 4	Q9HC35 [143-164]	S(2): 99.7; S(4): 0.3; S(8): 0.0; S(9): 0.0; T(18): 99.7; S(21): 0.3	Q9HC35 2xPhospho [T160(100); S]	2	1.22	0.021759	0.48	0.574177	0.73	0.220148
TSSVVTLEVAK	P55196	MLLT4	Afadin	P55196 [1081-1091]	T(1): 33.3; S(2): 33.3; S(3): 33.3; T(6): 0.0		3	0.07	0.783967	0.47	0.124907	-0.4	0.220148
TKVGDGDLSAEEIPENEVSLRR	Q14684	RRP1B	Ribosomal RNA processing protein 1 homolog B	Q14684 [237-258]	T(1): 0.0; S(9): 100.0; S(19): 0.0	Q14684 1xPhospho [S245(100)]	1	0.74	0.0150001	0.34	0.445003	0.4	0.220326
AYSVLQATVAAATTTPTAK	Q5PRF9	SAMD4B	Protein Smaug homolog 2	Q5PRF9 [393-411]	Y(2): 0.0; S(3): 0.0; T(8): 0.0; T(13): 0.2; T(14): 9.4; T(15): 81.1; T(17): 9.4	Q5PRF9 1xPhospho [T407(81)]	2	-0.19	0.333189	-0.67	0.0545458	0.48	0.220326
PGVPVEGSPGRNPGV	Q8NE01	CNNM3	Metal transporter CNNM3	Q8NE01 [693-707]	S(8): 100.0	Q8NE01 1xPhospho [S700(100)]	1	-0.55	0.125494	0.1	0.869951	-0.65	0.220881
YRSQSGEDESMNQPGPIK	O43933	PEX1	Peroxisome biogenesis factor 1	O43933 [1207-1224]	Y(1): 98.9; S(3): 0.6; S(5): 0.6; S(10): 0.0	O43933 1xPhospho [Y1207(98.9)]	1	0.7	0.037127	0.19	0.761784	0.5	0.220961
APACSPEAAAAQLR	O14526	FCHO1	FCH domain only protein 1	O14526 [368-381]	S(5): 100.0	O14526 1xPhospho [S372(100)]	2	0.28	0.181535	0.6	0.0349511	-0.32	0.220961
GSGVAQSPQQPPPQQQQQQPPQQPTPPK	Q6VY07	PACS1	Phosphofurin acidic cluster sorting protein 1	Q6VY07 [22-49]	S(2): 0.0; S(7): 0.0; T(25): 100.0	Q6VY07 1xPhospho [T46(100)]	1	-0.07	0.772288	0.29	0.250482	-0.36	0.221393
DGDKSPMSSLQISNEK	Q9UER7	DAXX	Death domain-associated protein 6	Q9UER7 [491-506]	S(5): 99.9; S(8): 0.1; S(9): 0.0; S(13): 0.0	Q9UER7 1xPhospho [S495(99.9)]	1	-0.13	0.681537	0.32	0.290336	-0.45	0.221393
RIPVLSPKPAVAPPAPPSSSQLCR	Q6PJT7	ZC3H14	Zinc finger CCCH domain-containing protein 14	Q6PJT7 [660-683]	S(6): 100.0; S(18): 0.0; S(19): 0.0; S(20): 0.0	Q6PJT7 1xPhospho [S665(100)]	1	1.16	0.00238324	0.77	0.0900828	0.39	0.221668
VDGPRSPSYGR	Q07955	SRSF1	Serine/arginine-rich splicing factor 1	Q07955 [194-204]	S(6): 100.0; S(8): 99.3; Y(9): 0.7	Q07955 2xPhospho [S199(100); S201(99.3)]	1	0.01	0.968616	0.38	0.167603	-0.37	0.221801
LSAITMALQYGSESEEDAALAAAR	Q86U86	PBRM1	Protein polybromo-1	Q86U86 [342-365]	S(2): 0.0; T(5): 0.0; Y(10): 0.0; S(12): 100.0; S(14): 100.0	Q86U86 2xPhospho [S353(100); S355(100)]	8	-0.32	0.382932	0.27	0.483137	-0.59	0.221801
CGEASPPSAACGSPASQLVATPSLELGPIPAGEEK	Q66K74	MAP1S	Microtubule-associated protein 1S	Q66K74 [588-622]	S(5): 50.0; S(8): 50.0; S(13): 0.0; S(16): 0.0; T(21): 0.0; S(23): 0.0		2	-0.59	0.0781985	0.02	0.995085	-0.6	0.221801
NLEELNISSAQ	Q9Y2R5	MRPS17	28S ribosomal protein S17, mitochondrial	Q9Y2R5 [120-130]	S(8): 0.1; S(9): 99.9	Q9Y2R5 1xPhospho [S128(99.9)]	1	-0.66	0.014532	-0.22	0.432047	-0.44	0.221801
NVEINLESKENTPPVVISADQMVNEDSQVQITPNQK	Q5UIP0	RIF1	Telomere-associated protein RIF1	Q5UIP0 [1377-1412]	S(8): 99.3; T(12): 0.7; S(18): 0.0; S(27): 0.1; T(32): 99.9	Q5UIP0 2xPhospho [S1384(99.3); T1408(99.9)]	2	0.78	0.0275221	0.25	0.65502	0.53	0.221829
KFVEWLQNAEEESESEGEEN	Q9Y6E2	BZW2	Basic leucine zipper and W2 domain-containing protein 2	Q9Y6E2 [400-419]	S(13): 100.0; S(15): 100.0	Q9Y6E2 2xPhospho [S412(100); S414(100)]	16	-0.13	0.469089	0.2	0.410833	-0.33	0.221829
LMHNASDSEVDQDDVVEWK	Q9H2P0	ADNP	Activity-dependent neuroprotector homeobox protein	Q9H2P0 [948-966]	S(6): 100.0; S(8): 100.0	Q9H2P0 2xPhospho [S953(100); S955(100)]	4	-0.31	0.226234	0.15	0.67469	-0.45	0.221829
RLLSTDAEAVSTR	Q15545	TAF7	Transcription initiation factor TFIID subunit 7	Q15545 [168-180]	S(4): 91.5; T(5): 8.5; S(11): 0.0; T(12): 0.0	Q15545 1xPhospho [S171(91.5)]	2	0.57	0.0125382	0.26	0.384868	0.31	0.222171
TNRFPSCEELETTK	Q9BVV6	KIAA0586	Protein TALPID3	Q9BVV6 [401-414]	T(1): 0.0; S(6): 98.9; T(12): 1.1; T(13): 0.0	Q9BVV6 1xPhospho [S406(98.9)]	1	0.32	0.45802	1.05	0.0731078	-0.73	0.222171
MEIGDTLSTAEESSPPK	Q9BYW2	SETD2	Histone-lysine N-methyltransferase SETD2	Q9BYW2 [118-134]	T(6): 0.0; S(8): 0.0; T(9): 0.0; S(13): 50.0; S(14): 50.0		1	-0.2	0.466064	0.26	0.413315	-0.46	0.222171
MDKDLGSVQGFEETNK	Q5T200	ZC3H13	Zinc finger CCCH domain-containing protein 13	Q5T200 [1417-1432]	S(7): 100.0; T(14): 0.0	Q5T200 1xPhospho [S1423(100)]	1	-0.21	0.31665	0.15	0.553643	-0.35	0.222171
SFCPIELNINGSPGAESDLATFCTSK	Q9BYW2	SETD2	Histone-lysine N-methyltransferase SETD2	Q9BYW2 [665-690]	S(1): 0.0; S(12): 10.7; S(17): 78.5; T(21): 10.7; T(24): 0.0; S(25): 0.0	Q9BYW2 1xPhospho [S676(81.7)]	2	-0.39	0.153482	0.09	0.80592	-0.48	0.222171
LQQGAGLESPQGQPEPGAASPQR	Q9H6F5	CCDC86	Coiled-coil domain-containing protein 86	Q9H6F5 [72-94]	S(9): 0.0; S(20): 100.0	Q9H6F5 1xPhospho [S80(100)]	6	-0.53	0.0317968	-0.08	0.707469	-0.45	0.222171
LDLEDSYTLR	Q5VWN6	FAM208B	Protein FAM208B	Q5VWN6 [1843-1852]	S(6): 47.5; Y(7): 5.0; T(8): 47.5		1	1.42	0.000389685	1.11	0.0107837	0.3	0.222389
QGSPSQSLVACECEASK	Q4AC94	C2CD3	C2 domain-containing protein 3	Q4AC94 [2144-2160]	S(3): 48.3; S(5): 48.3; S(7): 3.5; S(16): 0.0		2	0.27	0.291705	0.68	0.0496544	-0.4	0.222389
LILTDSGSAPTFCSDDEDVAPLSAK	P78312	FAM193A	Protein FAM193A	P78312 [280-304]	T(4): 0.0; S(6): 0.0; S(8): 0.0; T(11): 1.7; S(14): 98.2; S(23): 0.0	P78312 1xPhospho [S293(98.2)]	2	-0.73	0.0130969	-0.53	0.398452	-0.19	0.222389
LLSTQAEESQGPVLK	Q14005	IL16	Pro-interleukin-16	Q14005 [944-958]	S(3): 50.0; T(4): 50.0; S(9): 0.0		2	0	0.993421	-0.45	0.174682	0.45	0.222409
YPSPPMGSVSAPNLPTAEDNLEYVR	P46109	CRKL	Crk-like protein	P46109 [105-129]	Y(1): 1.8; S(3): 48.2; S(8): 48.2; S(10): 1.8; T(16): 0.0; Y(23): 0.0		1	-0.21	0.391637	-0.77	0.0634123	0.56	0.222409
SLSQILMEQLQK	Q659A1	NARG2; ICE2	Little elongation complex subunit 2	Q659A1 [455-466]	S(1): 50.0; S(3): 50.0		6	0.9	0.00196898	0.67	0.0728641	0.24	0.222688
LLSPSNEK	Q14694	USP10	Ubiquitin carboxyl-terminal hydrolase 10	Q14694 [545-552]	S(3): 50.0; S(5): 50.0		1	0.33	0.100098	-0.02	0.941906	0.36	0.222725
SFLSEPSSPGR	Q69YN4	KIAA1429	Protein virilizer homolog	Q69YN4 [1572-1582]	S(1): 0.0; S(4): 0.0; S(7): 0.7; S(8): 99.3	Q69YN4 1xPhospho [S1579(99.3)]	4	-0.38	0.0461263	-0.06	0.83384	-0.32	0.22287
FTSSQTQSPTPPKPPSPSFELGLSSFPPLPGAAGNLK	Q92615	LARP4B	La-related protein 4B	Q92615 [509-545]	T(2): 0.0; S(3): 0.0; S(4): 0.0; T(6): 0.0; S(8): 0.0; T(10): 0.0; S(16): 14.1; S(18): 85.4; S(24): 0.4; S(25): 0.1		5	-0.42	0.0666221	-0.01	0.945176	-0.41	0.22287
GKGFSVVADTPELQR	Q14847	LASP1	LIM and SH3 domain protein 1	Q14847 [95-109]	S(5): 0.0; T(10): 100.0	Q14847 1xPhospho [T104(100)]	1	2.25	0.0446358	0.71	0.820485	1.54	0.223396
VSGSSDSVATMNSEEFVLVPQYADDNSTK	Q5R372	RABGAP1L	Rab GTPase-activating protein 1-like	Q5R372 [10-38]	S(2): 0.0; S(4): 0.0; S(5): 0.0; S(7): 0.0; T(10): 0.1; S(13): 99.8; Y(22): 0.0; S(27): 0.0; T(28): 0.0	Q5R372 1xPhospho [S22(99.8)]	1	-0.56	0.0591648	-0.1	0.913136	-0.47	0.223404
ESVPEFPLSPPKKK	P16949	STMN1	Stathmin	P16949 [30-43]	S(2): 0.0; S(9): 100.0	P16949 1xPhospho [S38(100)]	4	1.27	0.000843475	0.92	0.0277113	0.34	0.223522
GLLVRSPVSK	Q9NRI5	DISC1	Disrupted in schizophrenia 1 protein	Q9NRI5 [92-101]	S(6): 100.0; S(9): 0.1	Q9NRI5 1xPhospho [S97(100)]	1	1.02	0.00361845	0.59	0.131772	0.43	0.223522
APIIPHSGSIEK	Q96NB3	ZNF830	Zinc finger protein 830	Q96NB3 [217-228]	S(7): 8.4; S(9): 91.6	Q96NB3 1xPhospho [S225(91.6)]	1	0.7	0.0273585	0.24	0.646524	0.46	0.223522
EADDDEEVDDNIPEMPSPKK	P26358	DNMT1	DNA (cytosine-5)-methyltransferase 1	P26358 [698-717]	S(17): 100.0	P26358 1xPhospho [S714(100)]	4	0.13	0.52981	0.47	0.0839807	-0.35	0.223522
TEEARPSPAPGPGTPTGTPTR	Q4KMP7	TBC1D10B	TBC1 domain family member 10B	Q4KMP7 [135-155]	T(1): 0.0; S(7): 0.0; T(14): 100.0; T(16): 1.4; T(18): 88.0; T(20): 10.6	Q4KMP7 2xPhospho [T148(100); T152(88)]	2	0.13	0.745473	0.6	0.119427	-0.47	0.223522
WPPTASPPPAR	Q7Z591	AKNA	AT-hook-containing transcription factor	Q7Z591 [1372-1382]	T(4): 0.1; S(6): 99.9	Q7Z591 1xPhospho [S1377(99.9)]	5	-0.33	0.0949353	0.02	0.958748	-0.35	0.223522
RTSTPVIMEGVQEETDTR	Q8NFC6	BOD1L1	Biorientation of chromosomes in cell division protein 1-like 1	Q8NFC6 [657-674]	T(2): 33.3; S(3): 33.3; T(4): 33.3; T(15): 0.0; T(17): 0.0		3	-0.69	0.0158473	-0.2	0.457051	-0.48	0.223522
TVEVAEGEAVRTPQSVTAK	Q86UE4	MTDH	Protein LYRIC	Q86UE4 [132-150]	T(1): 0.0; T(12): 47.4; S(15): 5.3; T(17): 47.4		1	1.69	0.0452896	0.45	0.824148	1.23	0.223722
KVSSSSPQSGCPSPTIPAGK	Q76L83	ASXL2	Putative Polycomb group protein ASXL2	Q76L83 [134-153]	S(3): 0.0; S(4): 0.1; S(5): 1.0; S(6): 98.8; S(9): 0.1; S(13): 0.0; T(15): 0.0	Q76L83 1xPhospho [S139(98.8)]	1	-1.03	0.00125423	-0.51	0.0429545	-0.51	0.223755
[truncated: 6,662 more rows]
