# Supplementary material for: Temporal proteomic analysis of HIV infection reveals remodelling of the host phosphoproteome by lentiviral Vif variants
Source: eLife. 2016 Sep 30;5:e18296. doi: 10.7554/eLife.18296 (PMC5085607; doi:10.7554/eLife.18296)
Supplement: Figure 6—source data 2. — AURKA, AURKB and PLK1 targets were manually curated from the literature. Peptides listed overlap reported sites of phosphorylation by AURKA, AURAKB or PLK1, or are the only phosphopeptide identified from a protein known to be phosphorylated by one of these kinases, but at an unknown site. Peptides where the identified phosphorylation site explicitly matches the one reported are plotted in Figure 6E (blue shading; excluded peptides highlighted in red text). Studies cited: (Asano et al., 2013; Dephoure et al., 2008; Hengeveld et al., 2012; Kettenbach et al., 2011; Santamaria et al., 2011; Welburn et al., 2010; Yu et al., 2005). DOI: http://dx.doi.org/10.7554/eLife.18296.021 [file elife-18296-fig6-data2.xlsx]

## Sheet: Figure 6 - soure data 2
				Normalised phosphopeptide abundance
Peptide	Gene ID	Position in Protein	Modifications in Proteins	Mock	HIV WT	HIV ΔVif	Kinase in Literature	Dephoure et al, 2008	Hengeveld et al, 2012	Kettenbach et al, 2011	Other
RFSDFLGLYEK	SNX1	Q13596 [186-196]	Q13596 1xPhospho [S188(100)]	0.476882	2.17707	0.257345	AURKA	188
RLSTSPDVIQGHQPR	UBE2J1	Q9Y385 [264-278]	Q9Y385 2xPhospho [S266(95.3); T/S]	0.233138	1.6318	0.489849	AURKA	266
RISTLTIEEGNLDIQRPK	PPP1R8	Q12972 [176-193]	Q12972 1xPhospho [S178 (47.56); T179 (47.56)]	0.377025	1.75325	0.515531	AURKA	178
SLRLSAQK	TPX2	Q9ULW0 [121-128]	Q9ULW0 1xPhospho [S125(100)]	0.765134	1.23953	0.491167	AURKA	121
MSLPLLAGGVADDINTNKK	DLGAP5	Q15398 [724-742]	Q15398 1xPhospho [S725(100)]	0.831807	1.20641	0.483816	AURKA				Yu et al, 2005
VSLERLDLDLTADSQPPVFK	TRIM28	Q13263 [488-507]	Q13263 2xPhospho [S489(100); T498(100)]	0.620449	2.00591	0.70344	AURKA	489	S489
RNSPPNSLTPCLK	LEMD3	Q9Y2U8 [775-787]	Q9Y2U8 1xPhospho [S777(100)]	0.471163	1.56047	0.569631	AURKA	777
RQSMAFSILNTPK	NUMA1	Q14980 [2045-2057]	Q14980 1xPhospho [S2047(100)]	0.417323	1.75326	0.700251	AURKA		S2047:T2055
RPSPLSENVSELK	CDCA3	Q99618 [220-232]	Q99618 1xPhospho [S222(100)]	0.676938	1.22292	0.563464	AURKA	222
ASGQAFELILSPR	STMN1	P16949 [15-27]	P16949 2xPhospho [S16(100); S25(100)]	0.318068	1.78765	0.727185	AURKA	15 (15 is Alanine)
RRSLPAGDALYLSFNPPQPSR	ARHGEF2	Q92974 [884-904]	Q92974 1xPhospho [S886(100)]	0.477108	1.60212	0.720427	AURKA	886
RVSLEPHQGPGTPESK	NUMA1	Q14980 [1989-2004]	Q14980 2xPhospho [S1991(100); T2000(100)]	0.485827	1.63487	0.744353	AURKA		S1991:T2000
RRFSDFLGLHSK	SNX2	O60749 [182-193]	O60749 1xPhospho [S185(100)]	0.52474	1.40771	0.687814	AURKA	185
MSVDAVEIETLRK	GTF2I	P78347 [102-114]	P78347 1xPhospho [S103(100)]	0.459362	1.53786	0.801005	AURKA	103
RRYSDFEWLR	SNX3	O60493 [69-78]	O60493 1xPhospho [S72(93.5)]	0.421469	1.64414	0.871096	AURKA	72
LLEGEESRISLPLPNFSSLNLR	VIM	P08670 [403-424]	P08670 1xPhospho [S412(95.6)]	0.977273	1.88274	1.09623	AURKA	411 (411 is Isoleucine)
KCSLPAEEDSVLEK	MAP4	P27816 [634-647]	P27816 1xPhospho [S636(100)]	0.907643	1.38757	0.784394	AURKA	636	S636:S643
RTSFDDRLEDDDFDLIEENLGVK	SUPT6H	Q7KZ85 [89-111]	Q7KZ85 1xPhospho [S91(87.7)]	0.71772	1.19671	0.757308	AURKA	91
SFQDYTGQK	ZCCHC17	Q9NP64 [114-122]	Q9NP64 1xPhospho [S114(100)]	0.433279	1.36364	0.907219	AURKA	114
KQSSDYEELIQVLK	CDK5RAP2	Q96SN8 [545-558]	Q96SN8 1xPhospho [S547(95.9)]	0.404587	1.27251	1.11613	AURKA	547
KASGSENEGDYNPGR	TOP2B	Q02880 [1548-1562]	Q02880 1xPhospho [S1550(99.5)]	0.65874	1.1227	1.03439	AURKA	1550
VEMGTSSQNDVDMSWIPQETLNQINKASPR	SSR1	P43307 [241-270]	P43307 1xPhospho [S268(99.9)]	1.06569	1.21478	1.24182	AURKA	268
RMSPKPELTEEQK	CETN2	P41208 [18-30]	P41208 1xPhospho [S20(100)]	0.80566	0.92525	0.99276	AURKA	20
RSWDQQIK	SLBP	Q14493 [181-188]	Q14493 1xPhospho [S182(100)]	0.318809	1.73066	1.61255	AURKA	182
KLSPIIEDSR	BUB1B	O60566 [668-677]	O60566 1xPhospho [S670(100)]	0.990698	0.798048	1.04385	AURKA	670
RLSSFVTK	CAD	P27708 [1404-1411]	P27708 1xPhospho [S1406(94.9)]	0.973087	1.03607	0.615729	AURKA	1406
RFSEGVLQSPSQDQEK	TNKS1BP1	Q9C0C2 [427-442]	Q9C0C2 1xPhospho [S429(100)]	1.11581	0.98927	0.768203	AURKA	429
MIFEGPNKLSPR	PCF11	O94913 [768-779]	O94913 1xPhospho [S777(100)]	0.918299	0.941816	0.815838	AURKA	777
LGADESEEEGRRGSLSNAGDPEIVK	NRD1	O43847 [81-105]	O43847 1xPhospho [S94(97.4)]	1.31034	0.681261	0.684164	AURKA	94
RLSLDIQSPPNIGLR	BRWD1	Q9NSI6 [694-708]	Q9NSI6 1xPhospho [S696(100)]	1.12669	0.776273	0.801429	AURKA	696
NRTSFTQEQIEALEK	PAX6	P26367 [213-227]	P26367 1xPhospho [S216(91.2)]	1.26202	0.753678	0.815336	AURKA	216
RVSFADTIK	CASC5	Q8NG31 [58-66]	Q8NG31 1xPhospho [S60(100)]	0.286632	1.71051	0.348578	AURKB		60		Welburn et al, 2010
KISLPIEDYFNK	ORC3	Q9UBD5 [21-32]	Q9UBD5 1xPhospho [S23(100)]	0.299268	1.79126	0.455824	AURKB		23
TFSLTEVR	KIF4A	O95239 [799-806]	O95239 1xPhospho [S801(100)]	0.342391	1.53132	0.567946	AURKB		779/801, 803
SARLSAMLVPVTPEVKPK	HMGN5	P82970 [20-37]	P82970 2xPhospho [S20(100); S24(100)]	0.0611686	2.35219	0.122119	AURKB			20+24
SSRFSGGFGAR	DDX3X	O00571 [590-600]	O00571 1xPhospho [S594(95.6)]	0.565373	1.79724	0.897059	AURKB		594	594
RFSQGPTPAAAVPEGTAAEGAPR	DUS3L	Q96G46 [234-256]	Q96G46 1xPhospho [S236(92.5)]	0.412867	1.66951	0.497454	AURKB		236
SNFSNSADDIK	CBX5	P45973 [92-102]	P45973 1xPhospho [S92(100)]	0.58078	1.65402	0.534017	AURKB		92	92
LSLVIRSPSLLQSGAK	MYBBP1A	Q9BQG0 [1302-1317]	Q9BQG0 2xPhospho [S1303(100); S1308(100)]	0.210511	2.30118	0.456115	AURKB		1303+08, 1310	1303
RLSSSLNPSK	ATR	Q13535 [433-442]	Q13535 1xPhospho [S435(94.7)]	0.577673	1.19013	0.95581	AURKB		435/437
LRSSVPGVR	VIM	P08670 [70-78]	P08670 1xPhospho [S72(99.9)]	1.09943	1.8274	1.01109	AURKB			73
RLSELGITQADDNLMSQEMFVGIVGNQFK	SHCBP1	Q8NEM2 [632-660]	Q8NEM2 1xPhospho [S634(89.7)]	0.63427	1.30473	0.520174	AURKB				Asano et al, 2013
DLVVPGSKPSGNDSCELR	TTK	P33981 [308-325]	P33981 1xPhospho [S321(100)]	0.575328	1.3933	0.534187	AURKB		321
NQGGYDRYSGGNYRDNYDN	RBM3	P98179 [139-157]	P98179 1xPhospho [S147(88.8)]	0.326633	1.44705	0.911791	AURKB		147	147
RSLEQNIQLPAALLSR	MCM7	P33993 [499-514]	P33993 1xPhospho [S500(100)]	0.790265	1.10755	0.831793	AURKB		500
APSLTNDEVEEFR	DDX10	Q13206 [537-549]	Q13206 1xPhospho [S539(95.8)]	0.906922	0.921386	0.836004	AURKB		539
NFDFEGSLSPVIAPK	ANAPC1	Q9H1A4 [680-694]	Q9H1A4 1xPhospho [S688(92.1)]	1.12732	0.693289	0.886449	PLK1		S686:S688
LDSSIISEGK	CDC27	P30260 [432-441]	P30260 1xPhospho [S435(95.4)]	0.449285	1.13423	1.17073	PLK1	435	426:S434,S435
IEENSLKEEESIEGEKEVK	CHD4	Q14839 [1566-1584]	Q14839 1xPhospho [S1570(100)]	0.762976	1.04553	1.01423	PLK1	1570	S1570:S1576
KPVAGALDVSFNK	COPS8	Q99627 [166-178]	Q99627 1xPhospho [S175(100)]	0.458029	1.46961	0.989109	PLK1	175	175
NLSELQDTSLQQLVSQR	DNTTIP2	Q5QJE6 [322-338]	Q5QJE6 1xPhospho [S330(100)]	0.56676	1.24747	1.36658	PLK1	330	T329,S330
VMVTDADRSILSPGGSCGPIK	GTF2I	P78347 [199-219]	P78347 1xPhospho [S207(100)]	0.429404	1.28835	1.24121	PLK1	207	S207:S210
WISENQDSADVDPQEHSFTR	HERC1	Q15751 [1326-1345]	Q15751 1xPhospho [S1342(99.1)]	0.46601	1.13321	1.20342	PLK1	1342
RPTPNDDTLDEGVGLVHSNIATEHIPSPAKK	HMGCS1	Q01581 [469-499]	Q01581 2xPhospho [T476(93.6); S495(97.9)]	0.503348	1.24157	0.858534	PLK1	476	476:S495
DTLLSPDSSFEYVPPKPK	KIF4A	O95239 [1009-1026]	O95239 1xPhospho [S1016(87)]	0.367475	0.990899	1.32962	PLK1	1017	S1013:S1016,S1017
DKLDGNELDLSLSDLNEVPVK	LRRC59	Q96AG4 [13-33]	Q96AG4 1xPhospho [S23(99.9)]	0.681869	1.34576	1.11674	PLK1	23	S23,S25
KAGLSEEDDSLVDVYYR	PDCD11	Q14690 [1489-1505]	Q14690 1xPhospho [S1498(100)]	0.857615	1.00576	0.855599	PLK1	1498	S1493:S1498
TAHNSEADLEESFNEHELEPSSPK	PHF6	Q8IWS0 [134-157]	Q8IWS0 2xPhospho [S145(86.2); S155(78.6)]	0.590164	1.1687	1.03326	PLK1	145	S146:S155,S156
LSTIDESGSILSDISFDKTDESLDWDSSLVK	RACGAP1	Q9H0H5 [143-173]	Q9H0H5 1xPhospho [S157(95.8)]	0.929064	0.872138	0.953909	PLK1	157
EGSEFSFSDGEVAEK	RIOK2	Q9BVS4 [330-344]	Q9BVS4 1xPhospho [S335(93.2)]	0.738266	1.00072	1.04656	PLK1	335
AADISLDNLVEGK	TP53BP1	Q12888 [1614-1626]	Q12888 1xPhospho [S1618(100)]	0.493138	1.38747	0.820787	PLK1	1618
LVANDSQLTPLEEWSNNR	CASC5	Q8NG31 [1034-1051]	Q8NG31 1xPhospho [S1039(100)]	0.638298	1.09658	0.917309	PLK1				Santamaria et al, 2011
