# Supplementary figures and images for: Temporal proteomic analysis of HIV infection reveals remodelling of the host phosphoproteome by lentiviral Vif variants
Source: eLife journal article supplement (doi:10.7554/elife.18296), 2016-09-30

**Figure 1 – figure supplement 1**

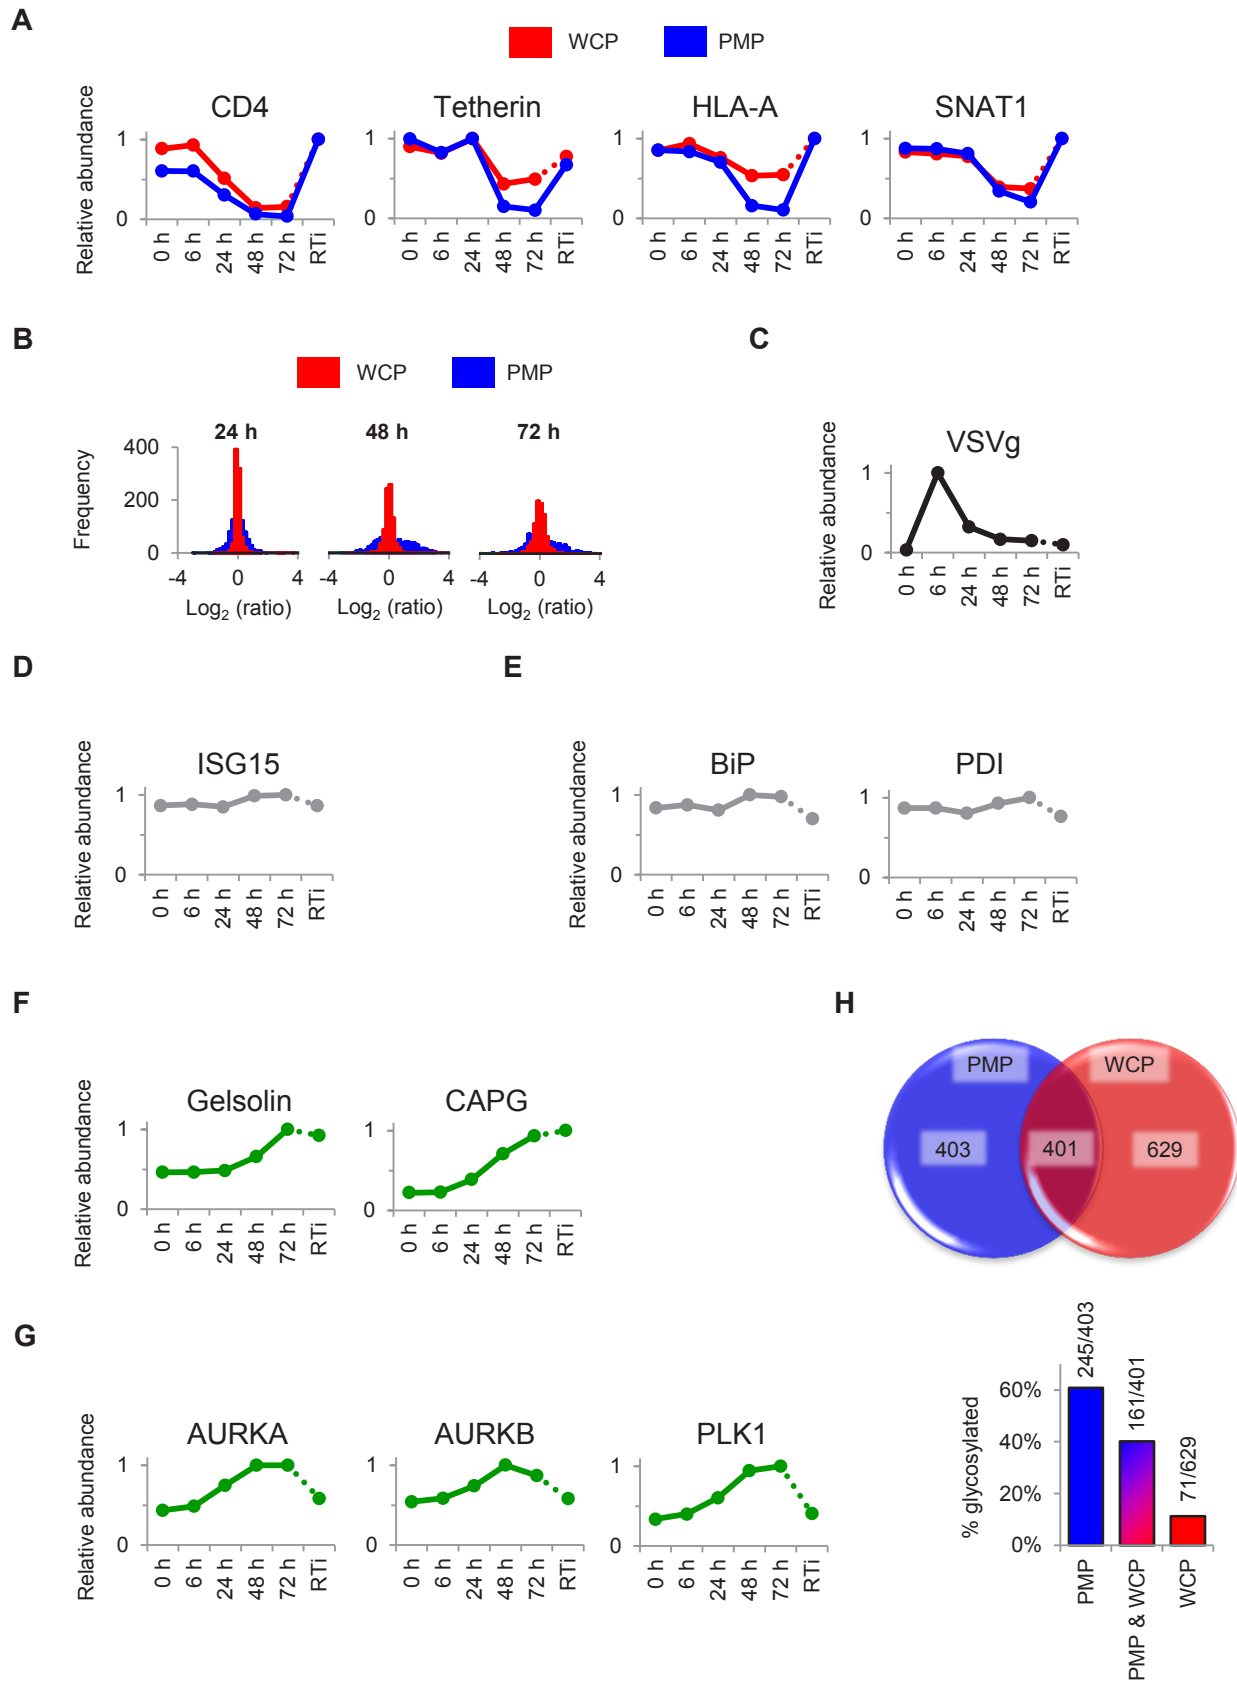

Supplement: supp [file elife_poa_e18296_Figure_1_figure_supplement_1.pdf › elife_poa_e18296_Figure_1_figure_supplement_1.pdf]

Figure 1 – figure supplement 2

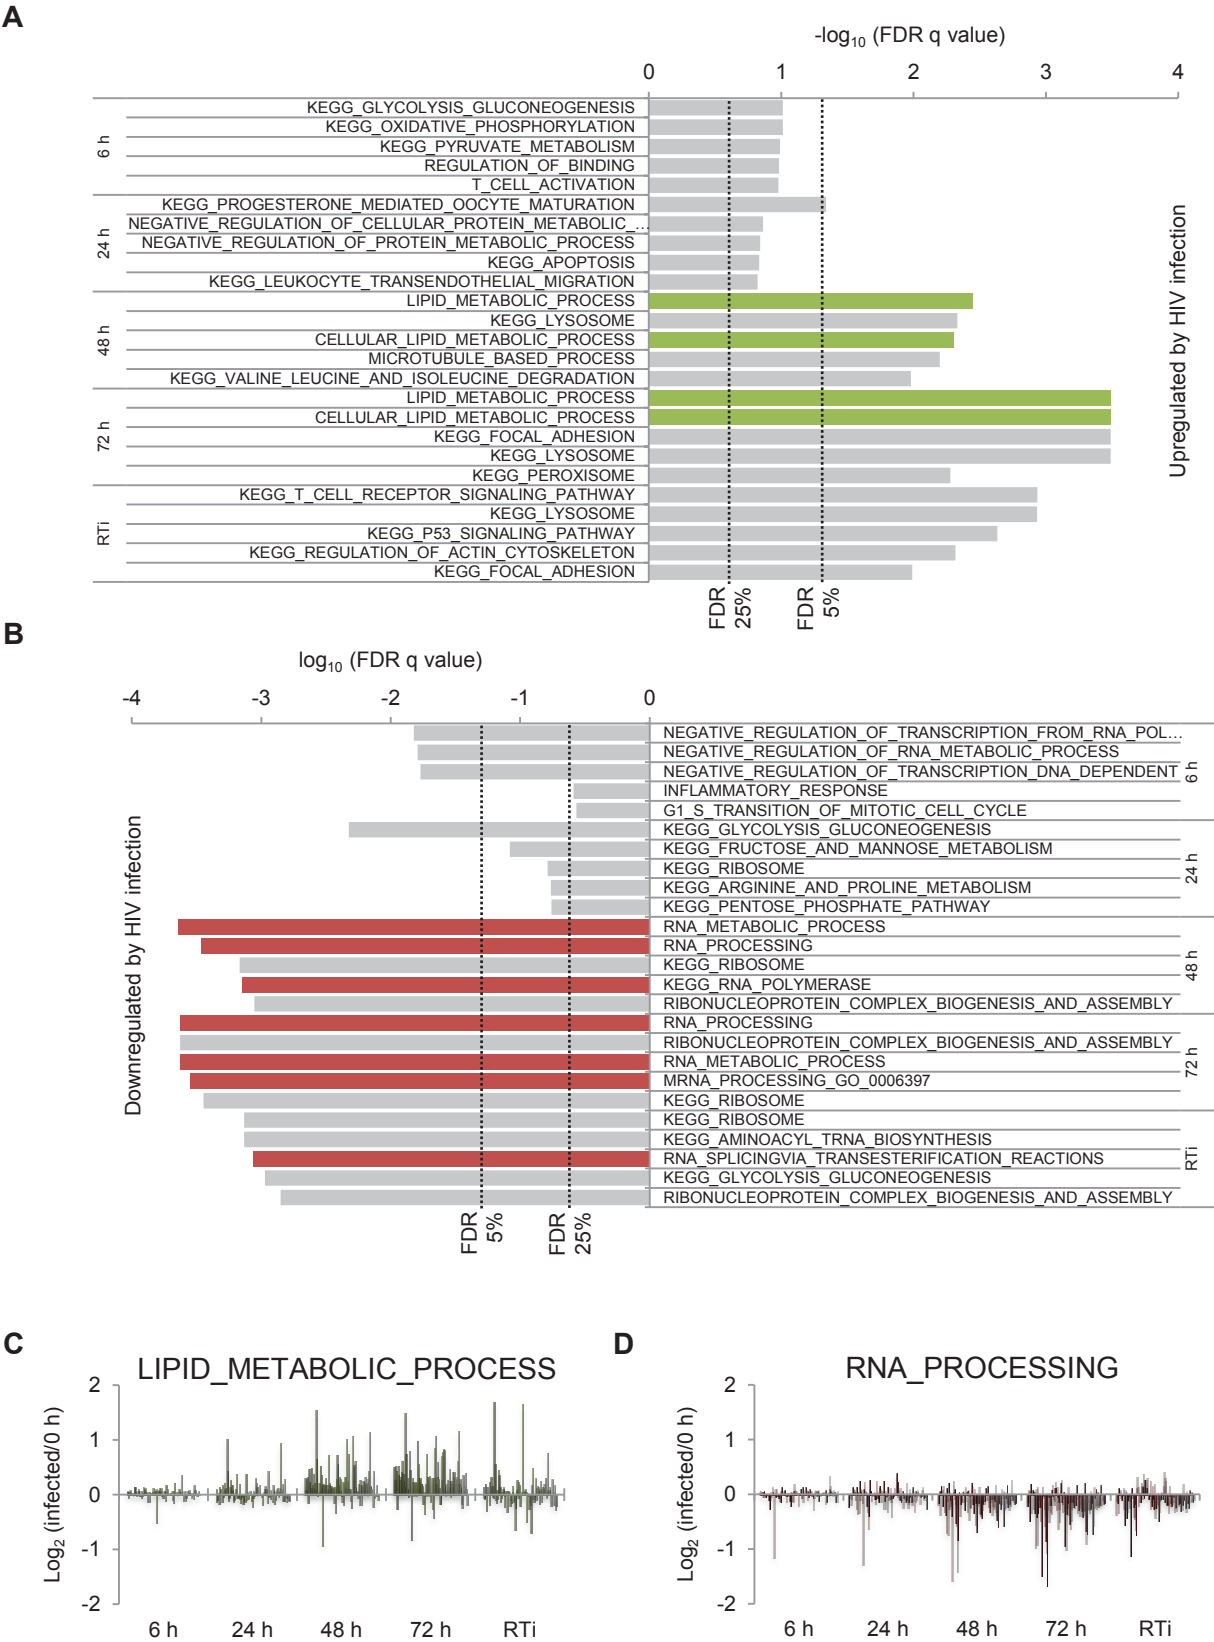

Supplement: supp [file elife_poa_e18296_Figure_1_figure_supplement_2.pdf › elife_poa_e18296_Figure_1_figure_supplement_2.pdf]

Figure 2 – figure supplement 1

A

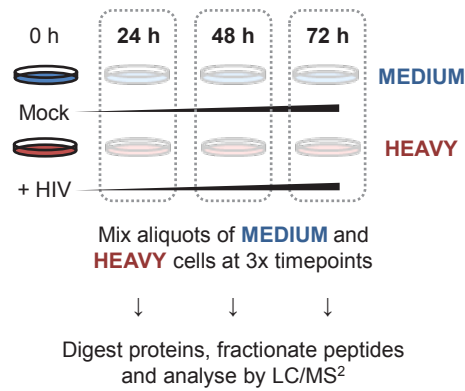

B

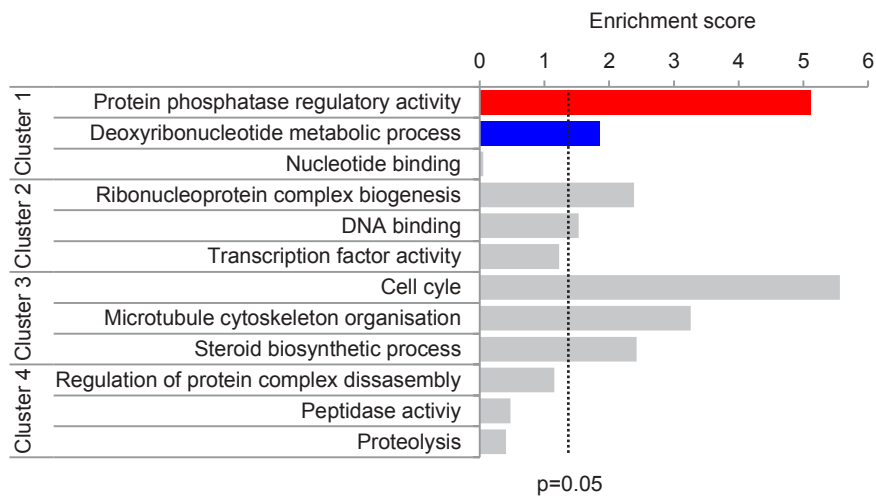

C

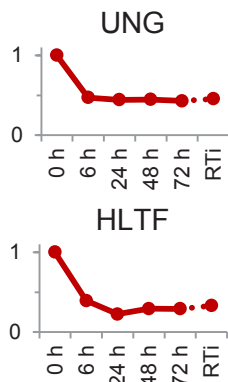

D

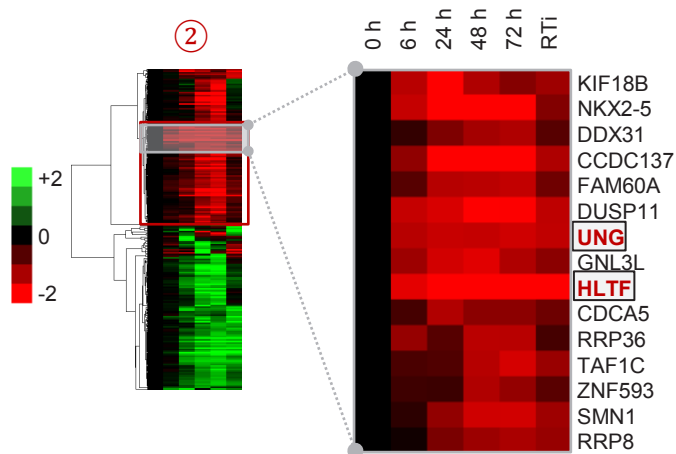

Supplement: supp [file elife_poa_e18296_Figure_2_figure_supplement_1.pdf › elife_poa_e18296_Figure_2_figure_supplement_1.pdf]

Figure 3 – figure supplement 1

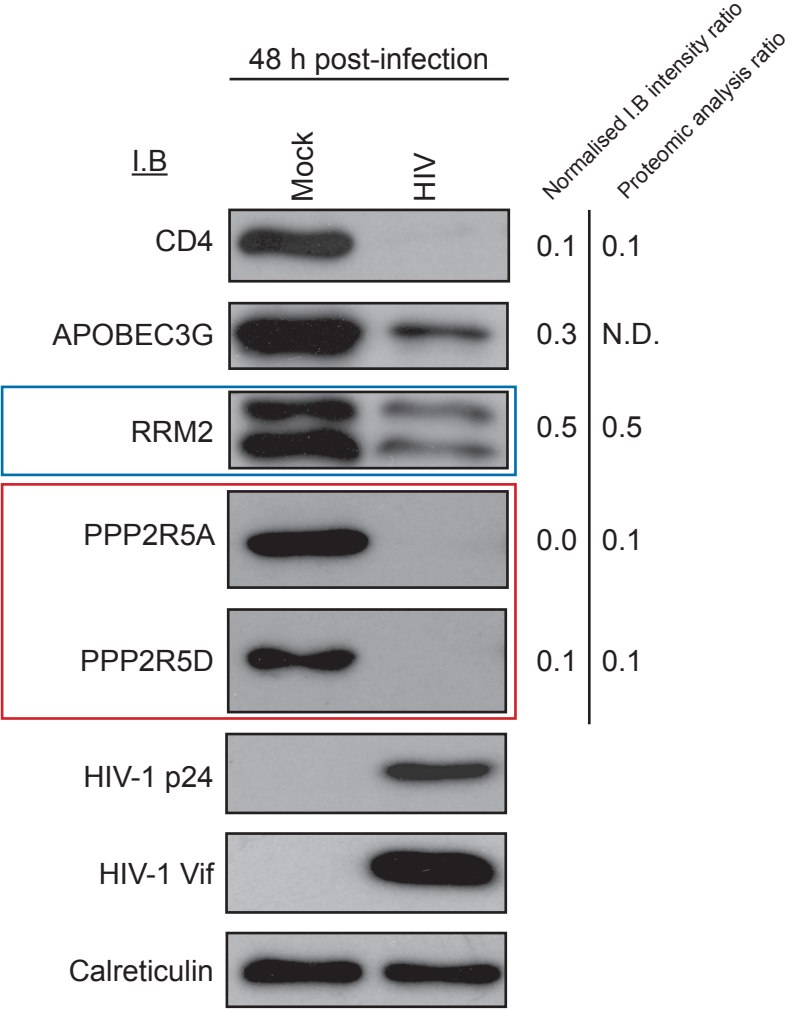

Supplement: supp [file elife_poa_e18296_Figure_3_figure_supplement_1.pdf › elife_poa_e18296_Figure_3_figure_supplement_1.pdf]

**Figure 4 – figure supplement 1**

**A**

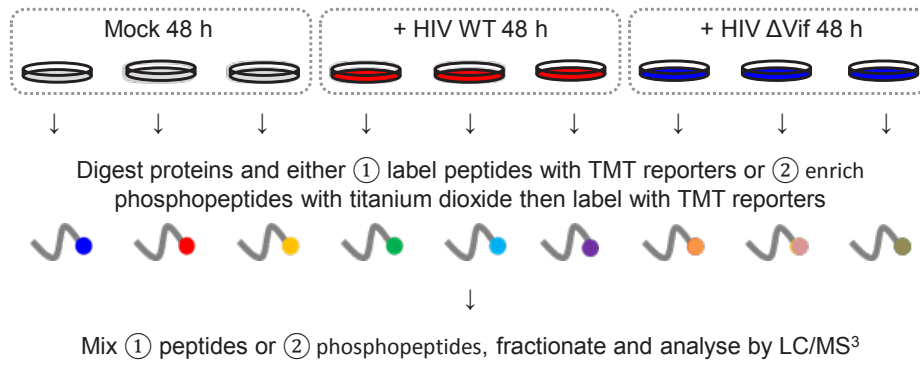

**B**

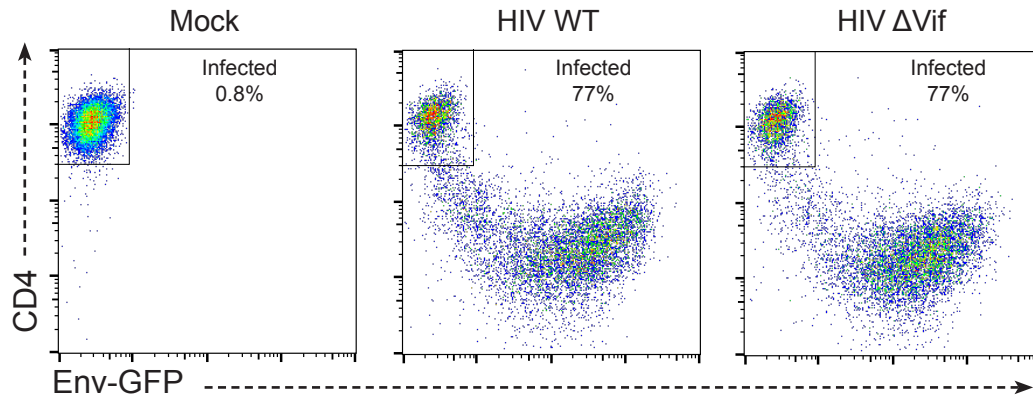

Supplement: supp [file elife_poa_e18296_Figure_4_figure_supplement_1.pdf › elife_poa_e18296_Figure_4_figure_supplement_1.pdf]

Figure 4 – figure supplement 2

**A**

**CEM-T4 T cells**

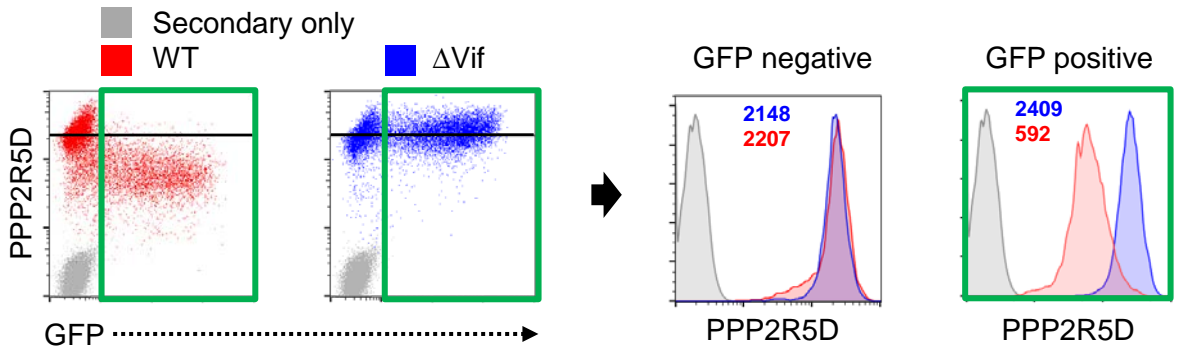

**B**

**Primary human CD4+ T cells**

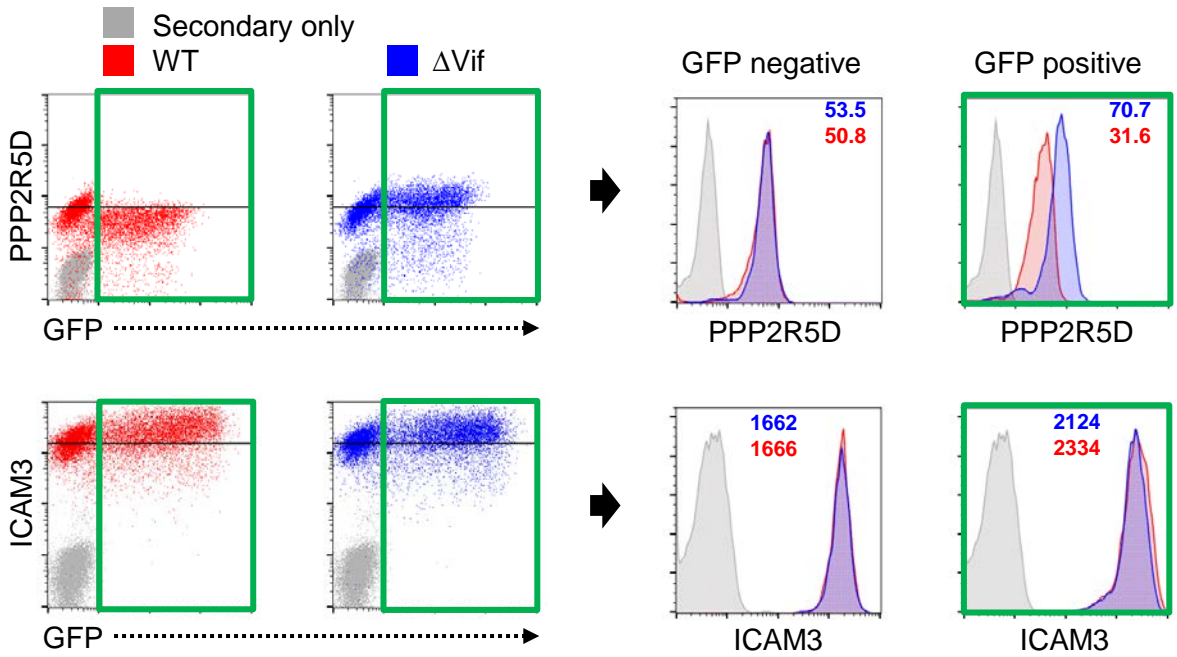

Supplement: supp [file elife_poa_e18296_Figure_4_figure_supplement_2.pdf › elife_poa_e18296_Figure_4_figure_supplement_2.pdf]

Figure 5 - figure supplement 1

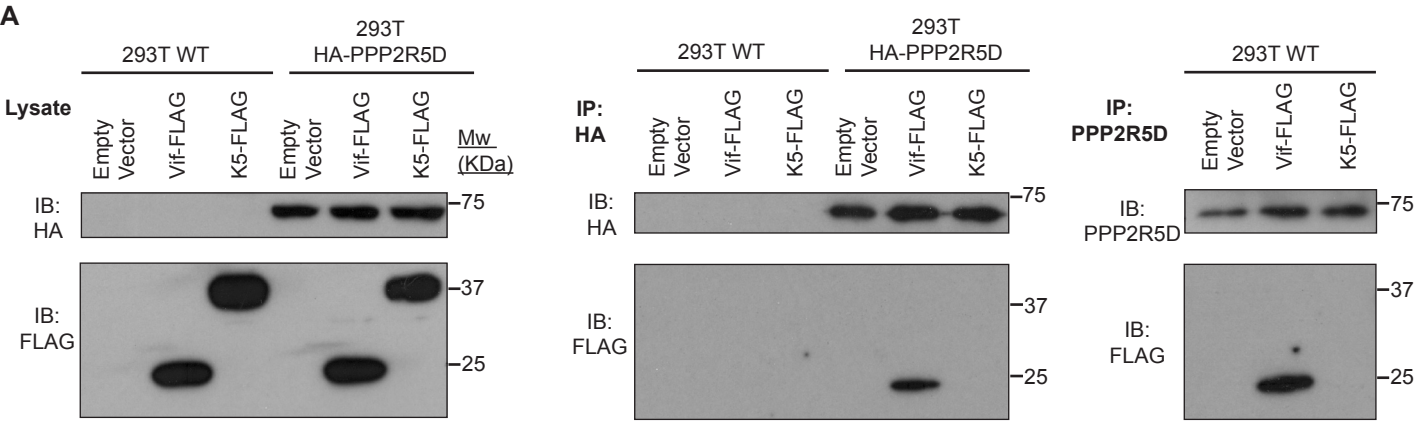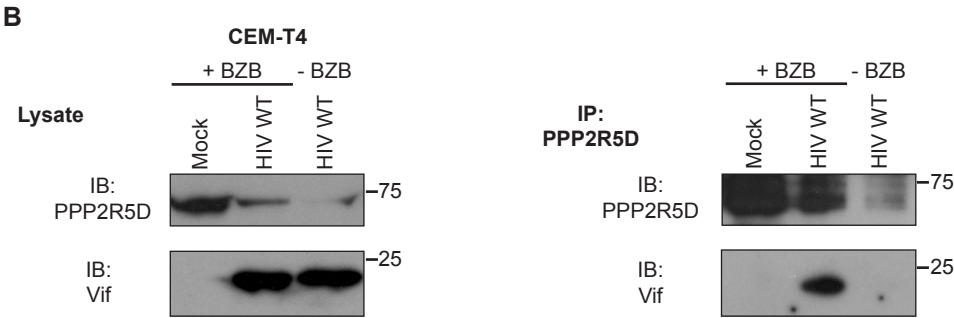

Supplement: supp [file elife_poa_e18296_Figure_5_figure_supplement_1.pdf › elife_poa_e18296_Figure_5_figure_supplement_1.pdf]

Figure 5 - figure supplement 2

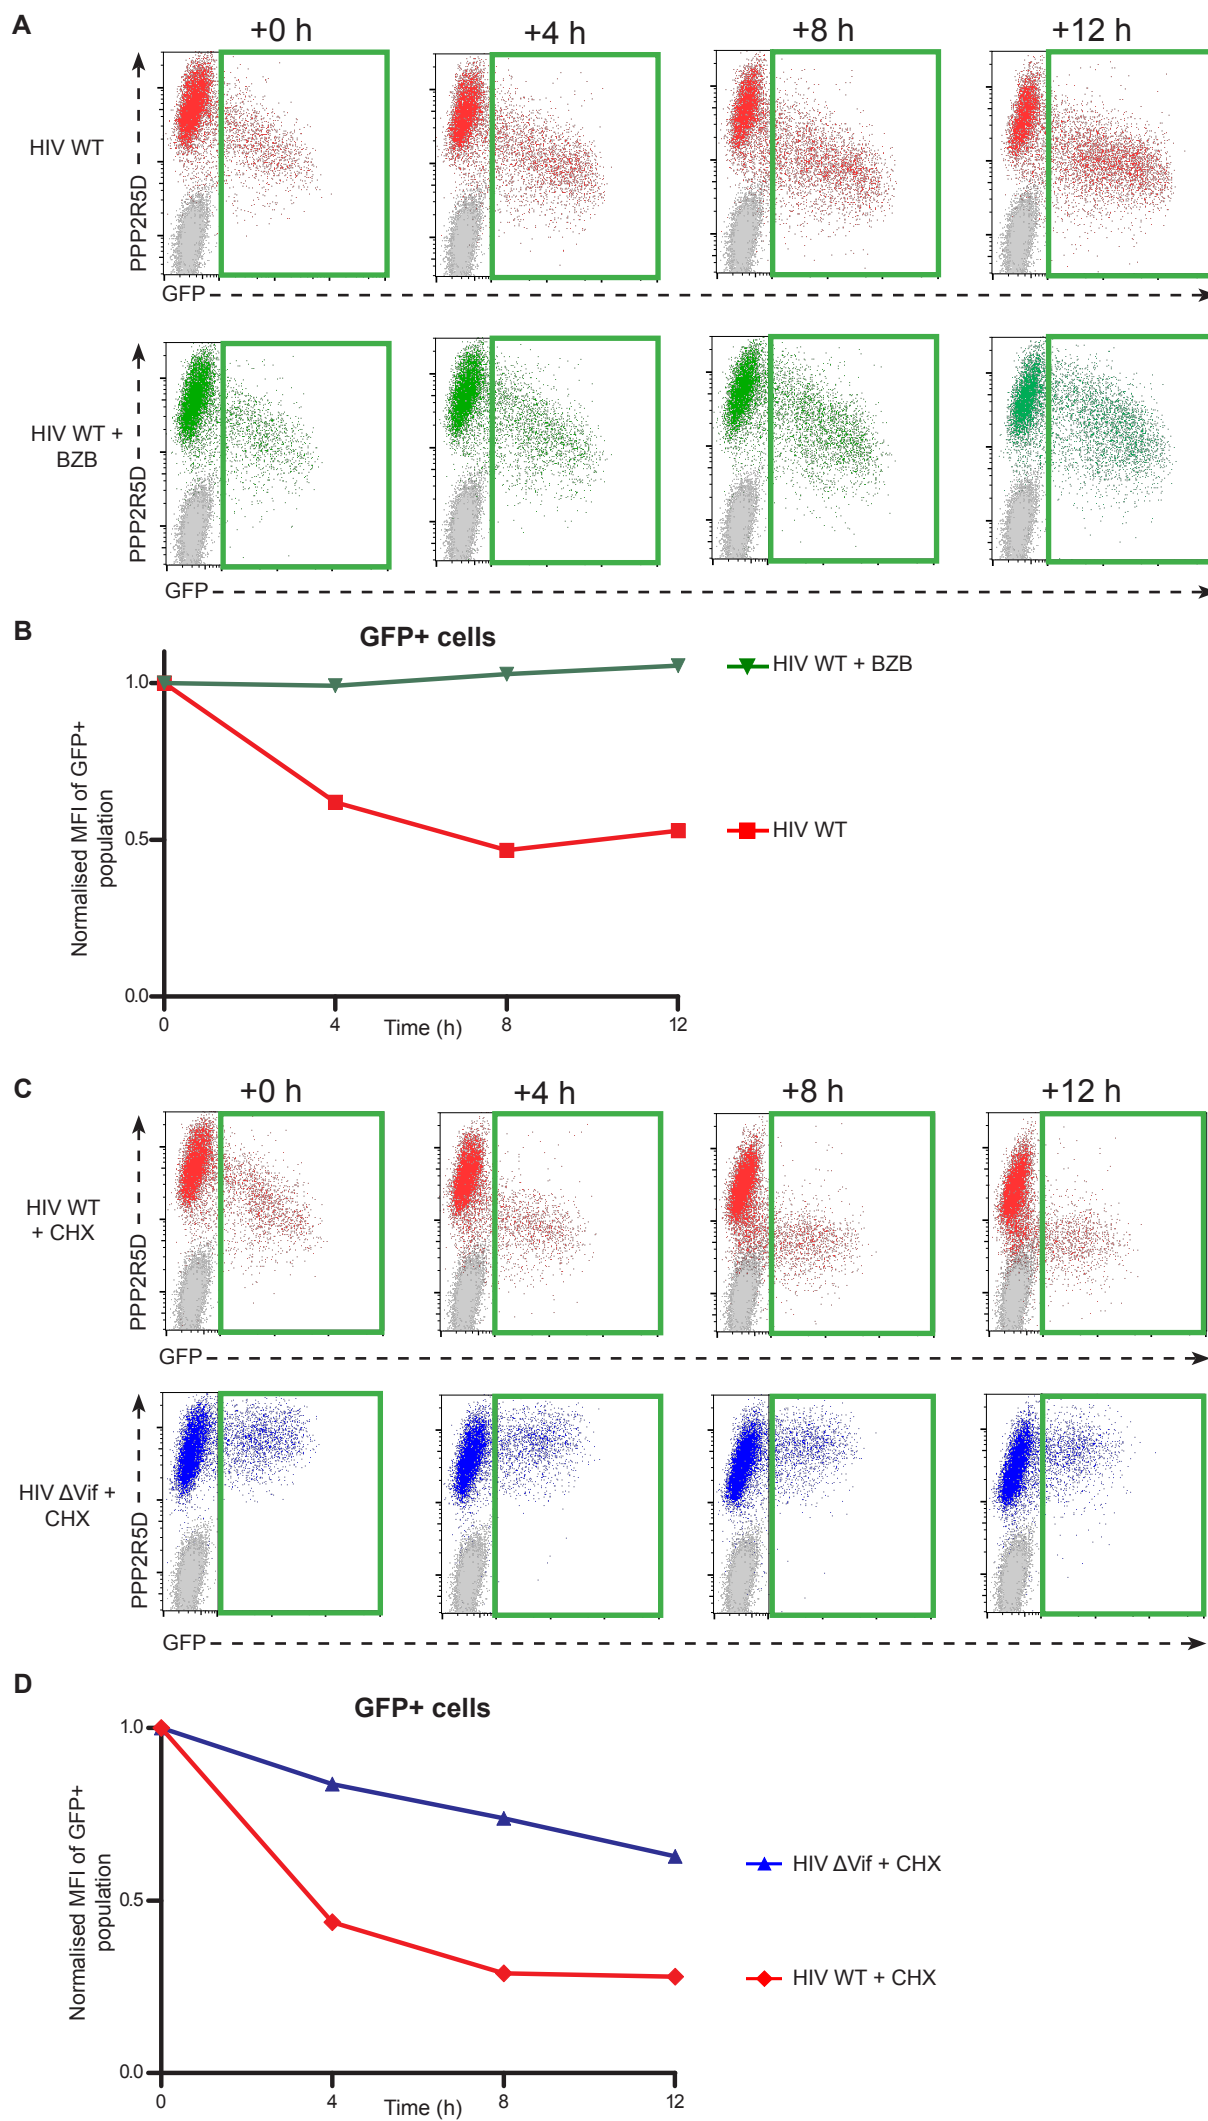

Supplement: supp [file elife_poa_e18296_Figure_5_figure_supplement_2.pdf › elife_poa_e18296_Figure_5_figure_supplement_2.pdf]

Figure 5 - figure supplement 3

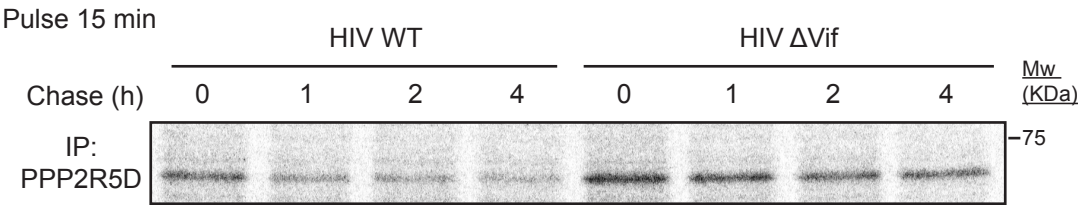

Supplement: supp [file elife_poa_e18296_Figure_5_figure_supplement_3.pdf › elife_poa_e18296_Figure_5_figure_supplement_3.pdf]

**Figure 6 – figure supplement 1**

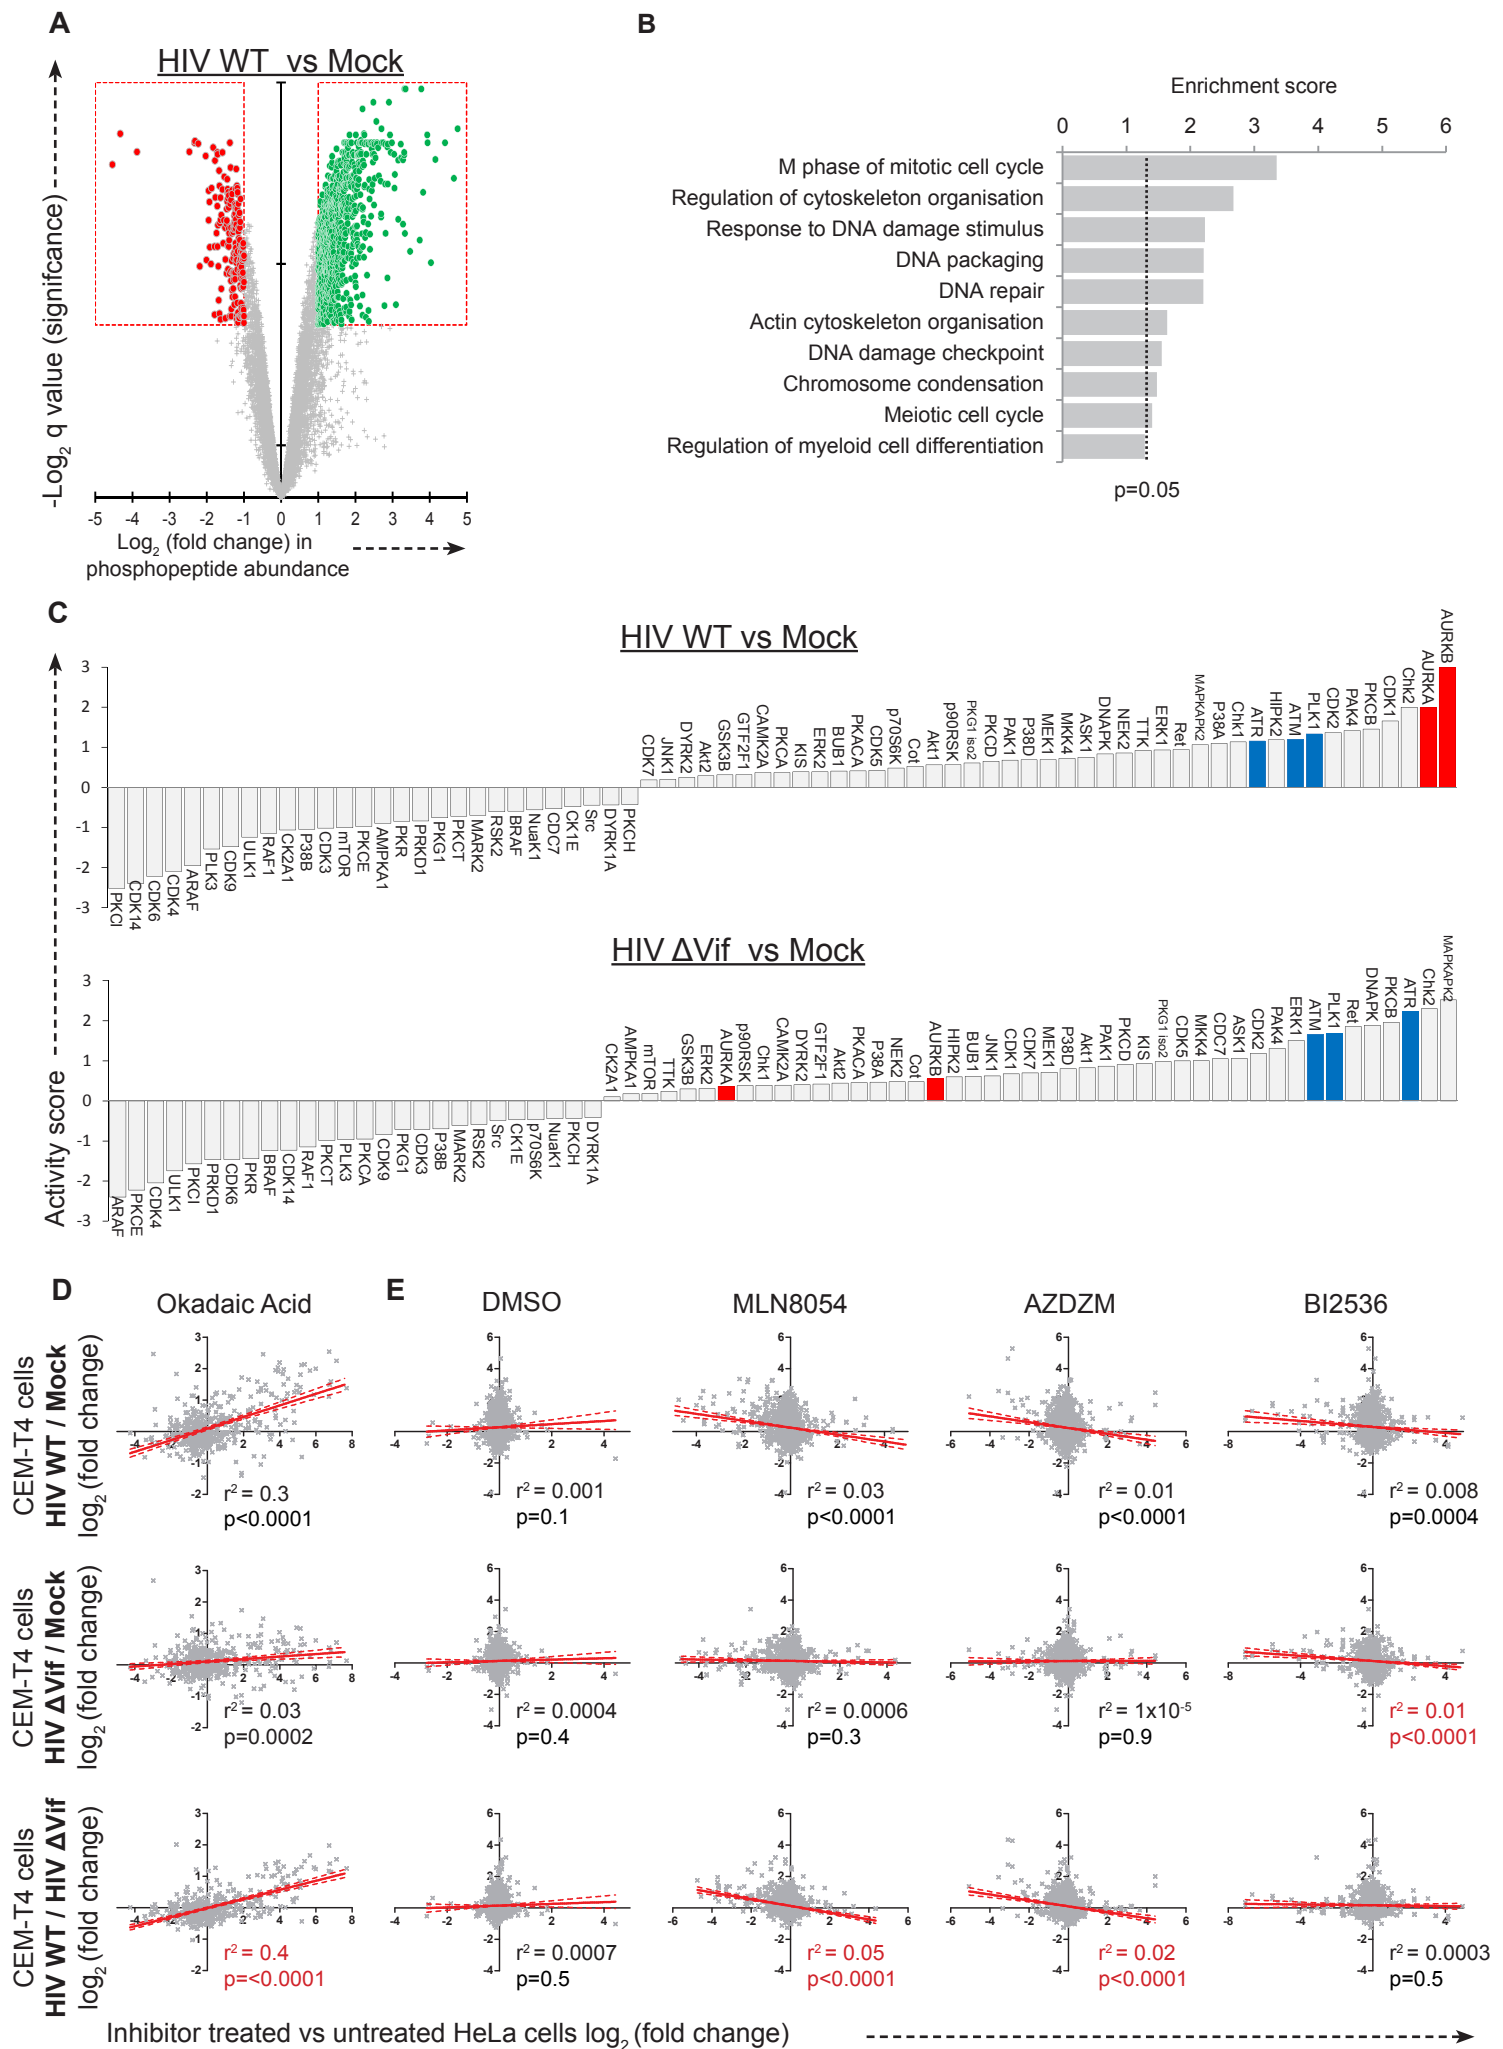

Supplement: supp [file elife_poa_e18296_Figure_6_figure_supplement_1.pdf › elife_poa_e18296_Figure_6_figure_supplement_1.pdf]

Figure 7 – figure supplement 1

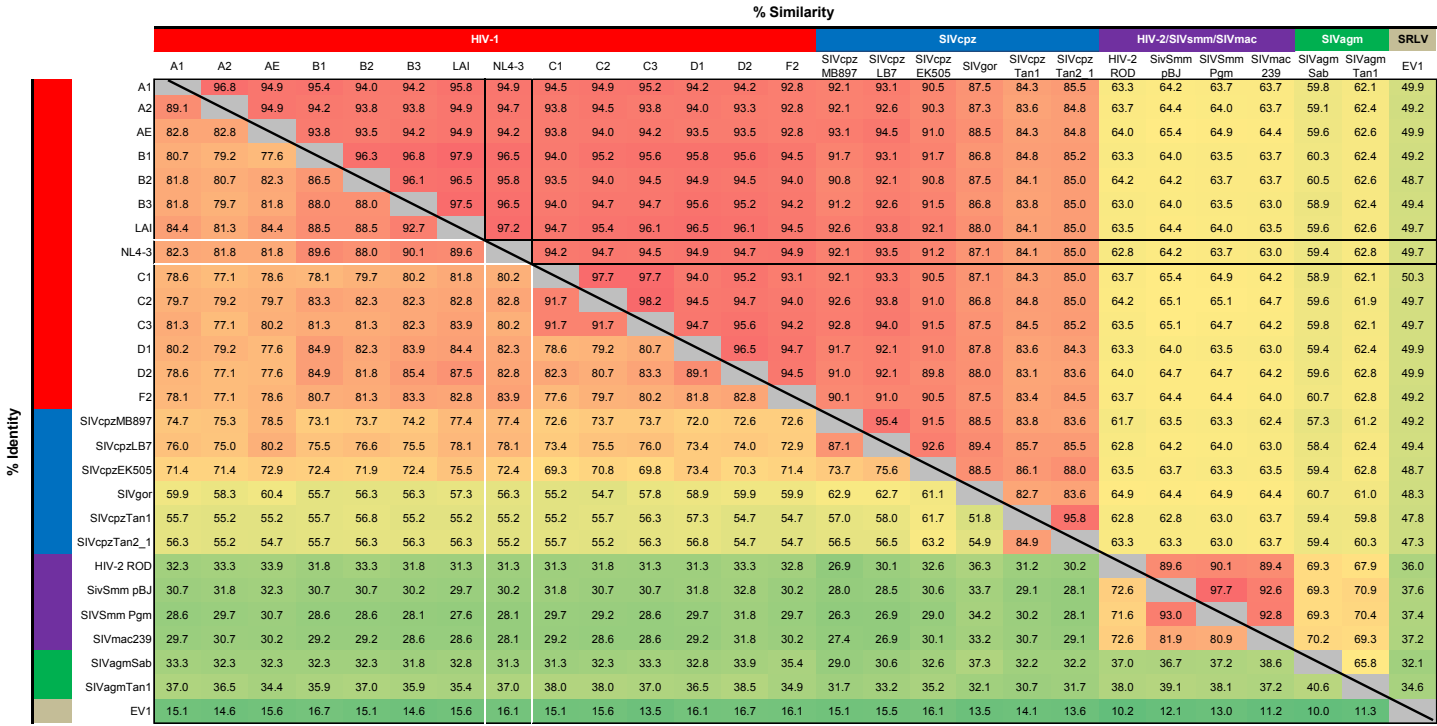

Supplement: supp [file elife_poa_e18296_Figure_7_figure_supplement_1.pdf › elife_poa_e18296_Figure_7_figure_supplement_1.pdf]

**Figure 7 – figure supplement 2**

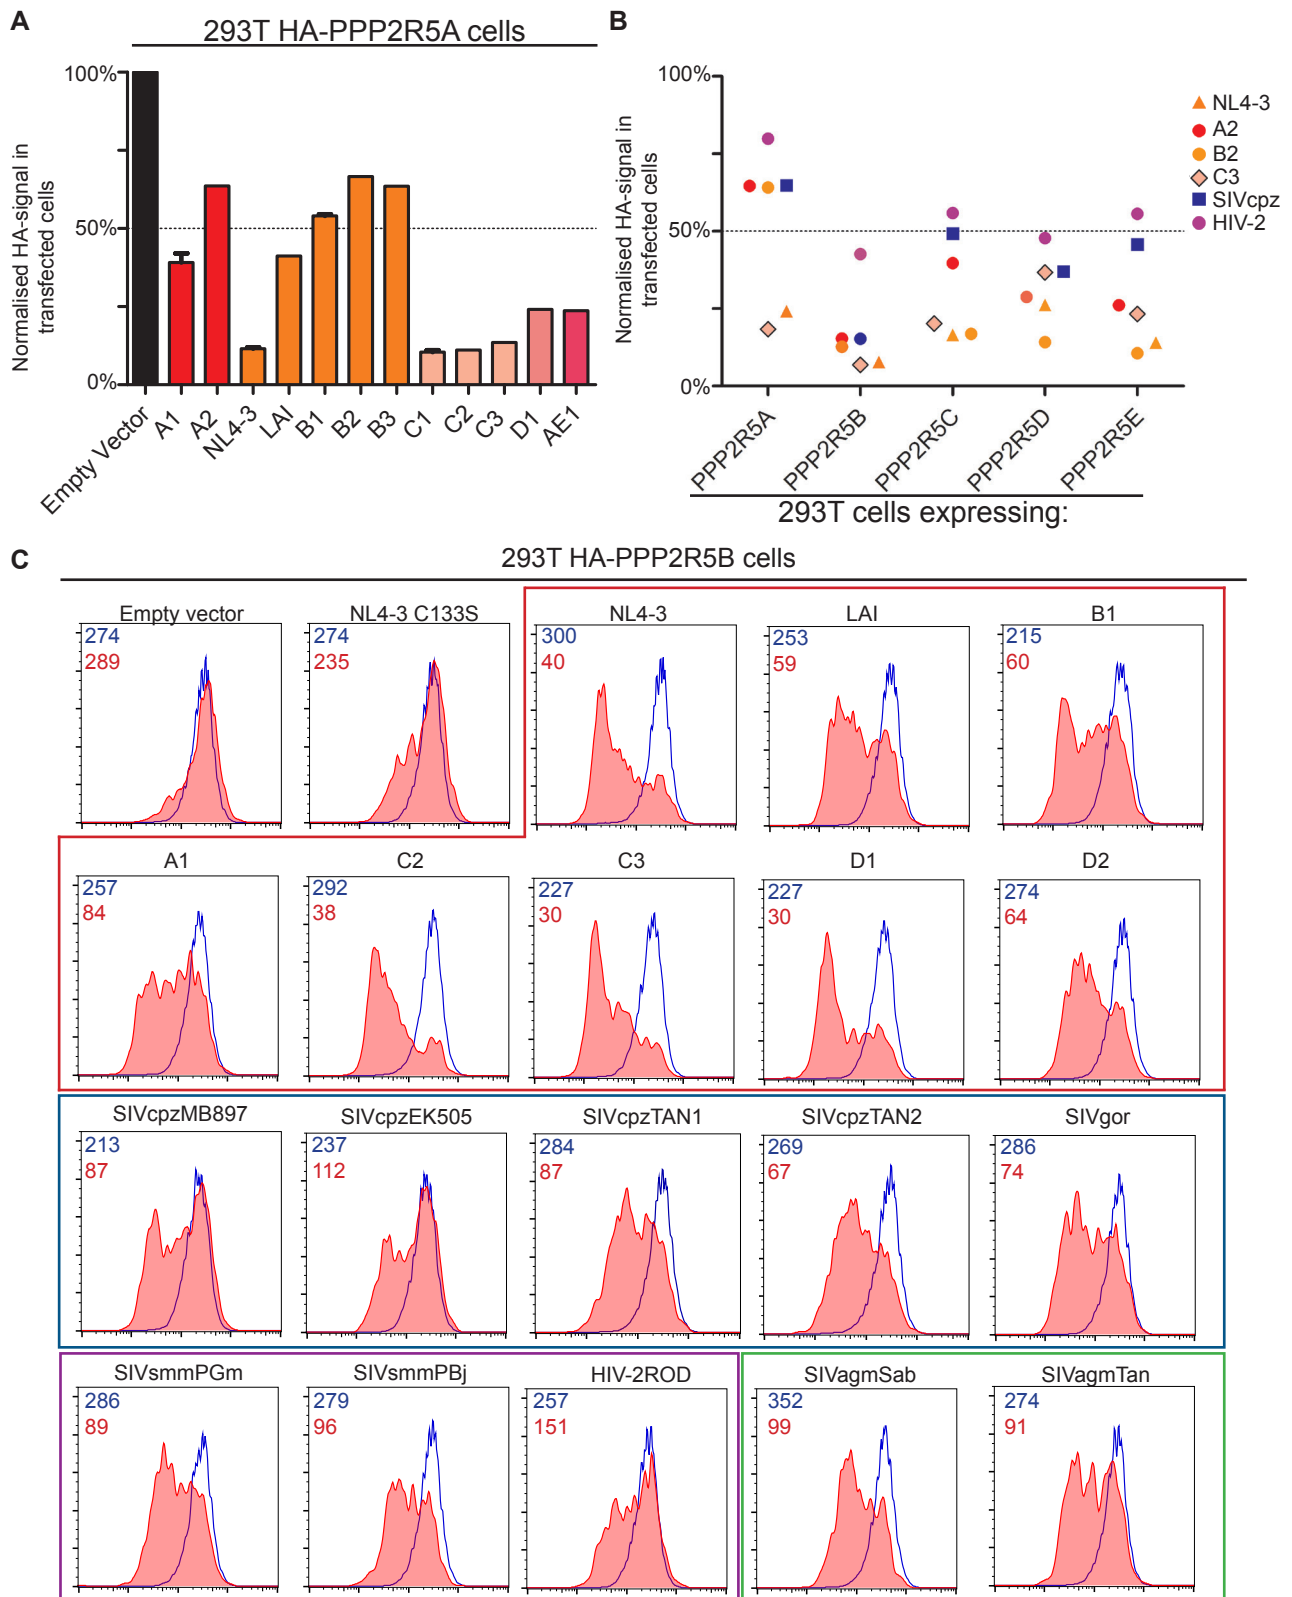

Supplement: supp [file elife_poa_e18296_Figure_7_figure_supplement_2.pdf › elife_poa_e18296_Figure_7_figure_supplement_2.pdf]

**Figure 7 - figure supplement 3**

**A**

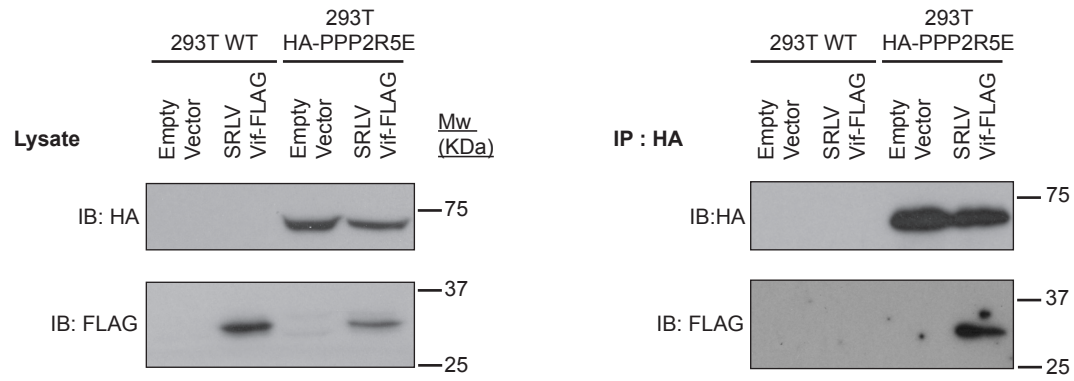

**B**

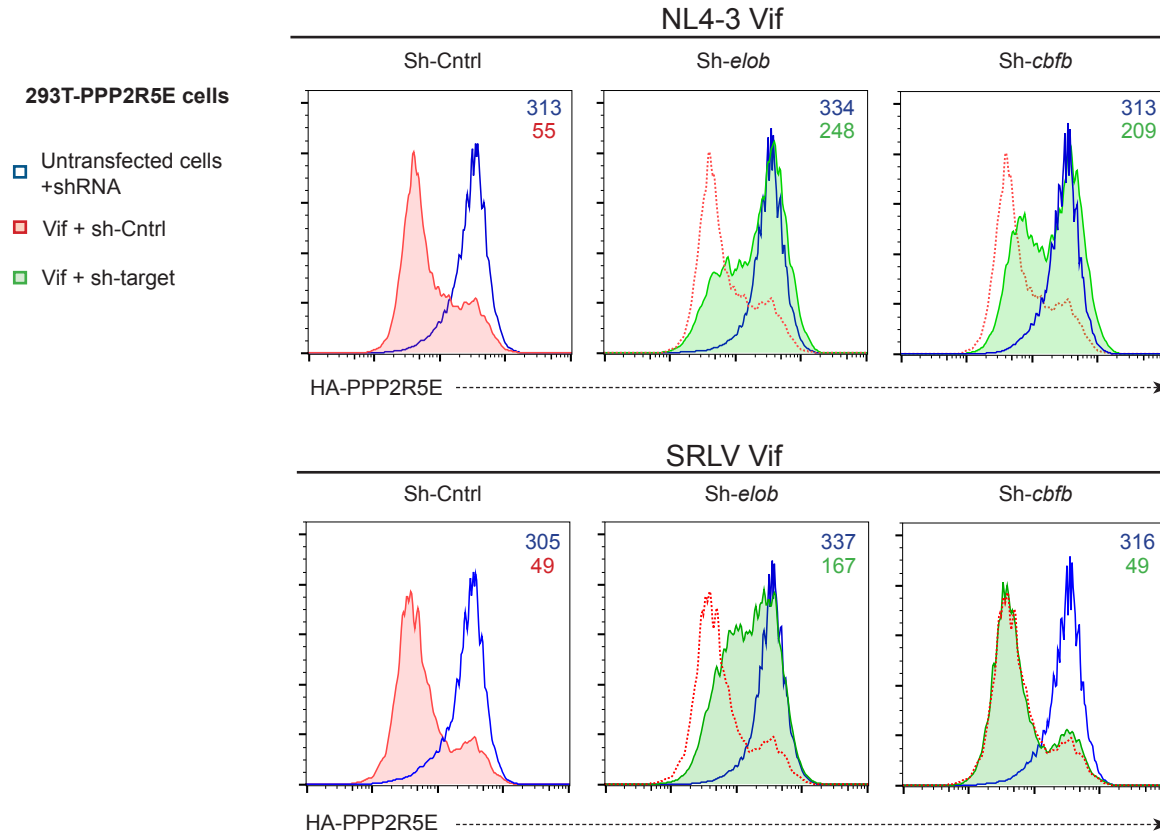

Supplement: supp [file elife_poa_e18296_Figure_7_figure_supplement_3.pdf › elife_poa_e18296_Figure_7_figure_supplement_3.pdf]
